# Supplementary material
Source: Research Square preprint supplement (doi:10.21203/rs.3.rs-9440532/v1)
Supplement: Supplementary file 1 [file 6355a258c7637d396dd699a8.xlsx]

## Sheet: Structural_zero_male_BKA_low
	Taxon	species	Low	High
1	Unclassified_Firmicutes_1_ASV3386	Unclassified_Firmicutes_1_ASV3386	Absence	Presence
2	Unclassified_LCP-89_2_ASV3746	Unclassified_LCP-89_2_ASV3746	Absence	Presence
3	Unclassified_MSB-3C8_ASV1412	Unclassified_MSB-3C8_ASV1412	Absence	Presence
4	Unclassified_Balneolaceae_52_ASV2804	Unclassified_Balneolaceae_52_ASV2804	Absence	Presence
5	Unclassified_Balneolaceae_64_ASV2817	Unclassified_Balneolaceae_64_ASV2817	Absence	Presence
6	Unclassified_Balneolaceae_77_ASV2831	Unclassified_Balneolaceae_77_ASV2831	Absence	Presence
7	Unclassified_Balneolaceae_41_ASV2792	Unclassified_Balneolaceae_41_ASV2792	Absence	Presence
8	Unclassified_Balneolaceae_30_ASV2780	Unclassified_Balneolaceae_30_ASV2780	Absence	Presence
9	Unclassified_Balneolaceae_21_ASV2770	Unclassified_Balneolaceae_21_ASV2770	Absence	Presence
10	Gracilimonas_ASV1026	Gracilimonas_ASV1026	Absence	Presence
11	Unclassified_Balneolaceae_78_ASV2832	Unclassified_Balneolaceae_78_ASV2832	Absence	Presence
12	Unclassified_Balneolaceae_71_ASV2825	Unclassified_Balneolaceae_71_ASV2825	Absence	Presence
13	Unclassified_Balneolaceae_9_ASV2838	Unclassified_Balneolaceae_9_ASV2838	Absence	Presence
14	Unclassified_Balneolaceae_20_ASV2769	Unclassified_Balneolaceae_20_ASV2769	Absence	Presence
15	Unclassified_Flavobacteriales_3_ASV3453	Unclassified_Flavobacteriales_3_ASV3453	Absence	Presence
16	Unclassified_Chitinophagales_2_ASV3035	Unclassified_Chitinophagales_2_ASV3035	Absence	Presence
17	Unclassified_Marinilabiliaceae_1_ASV3792	Unclassified_Marinilabiliaceae_1_ASV3792	Absence	Presence
18	Unclassified_Chitinophagales_8_ASV3041	Unclassified_Chitinophagales_8_ASV3041	Absence	Presence
19	Alistipes_ASV130	Alistipes_ASV130	Absence	Presence
20	Alistipes_ASV129	Alistipes_ASV129	Absence	Presence
21	Unclassified_Lentimicrobiaceae_14_ASV3756	Unclassified_Lentimicrobiaceae_14_ASV3756	Absence	Presence
22	Unclassified_Lentimicrobiaceae_4_ASV3761	Unclassified_Lentimicrobiaceae_4_ASV3761	Absence	Presence
23	Taibaiella_ASV2320	Taibaiella_ASV2320	Absence	Presence
24	Phaeodactylibacter_ASV1645	Phaeodactylibacter_ASV1645	Absence	Presence
25	Unclassified_Saprospiraceae_52_ASV4573	Unclassified_Saprospiraceae_52_ASV4573	Absence	Presence
26	Unclassified_Saprospiraceae_13_ASV4530	Unclassified_Saprospiraceae_13_ASV4530	Absence	Presence
27	Unclassified_Saprospiraceae_14_ASV4531	Unclassified_Saprospiraceae_14_ASV4531	Absence	Presence
28	Unclassified_Saprospiraceae_24_ASV4542	Unclassified_Saprospiraceae_24_ASV4542	Absence	Presence
29	Phaeodactylibacter_ASV1643	Phaeodactylibacter_ASV1643	Absence	Presence
30	Unclassified_Saprospiraceae_11_ASV4528	Unclassified_Saprospiraceae_11_ASV4528	Absence	Presence
31	Unclassified_Saprospiraceae_27_ASV4545	Unclassified_Saprospiraceae_27_ASV4545	Absence	Presence
32	Unclassified_Saprospiraceae_46_ASV4566	Unclassified_Saprospiraceae_46_ASV4566	Absence	Presence
33	Unclassified_Saprospiraceae_49_ASV4569	Unclassified_Saprospiraceae_49_ASV4569	Absence	Presence
34	Flavisolibacter_ASV945	Flavisolibacter_ASV945	Absence	Presence
35	Unclassified_Chitinophagaceae_12_ASV3013	Unclassified_Chitinophagaceae_12_ASV3013	Absence	Presence
36	Unclassified_Chitinophagaceae_18_ASV3019	Unclassified_Chitinophagaceae_18_ASV3019	Absence	Presence
37	Brumimicrobium_ASV376	Brumimicrobium_ASV376	Absence	Presence
38	Unclassified_Bacteroidia_5_ASV2755	Unclassified_Bacteroidia_5_ASV2755	Absence	Presence
39	Unclassified_Bacteroidetes_vadinHA17_2_ASV2750	Unclassified_Bacteroidetes_vadinHA17_2_ASV2750	Absence	Presence
40	Unclassified_Bacteroidetes_BD2-2_7_ASV2746	Unclassified_Bacteroidetes_BD2-2_7_ASV2746	Absence	Presence
41	Unclassified_Prolixibacteraceae_3_ASV4236	Unclassified_Prolixibacteraceae_3_ASV4236	Absence	Presence
42	Unclassified_Bacteroidetes_BD2-2_22_ASV2738	Unclassified_Bacteroidetes_BD2-2_22_ASV2738	Absence	Presence
43	Unclassified_Flavobacteriaceae_19_ASV3402	Unclassified_Flavobacteriaceae_19_ASV3402	Absence	Presence
44	Unclassified_Flavobacteriaceae_21_ASV3405	Unclassified_Flavobacteriaceae_21_ASV3405	Absence	Presence
45	Psychroflexus_ASV1792	Psychroflexus_ASV1792	Absence	Presence
46	Unclassified_Flavobacteriaceae_6_ASV3447	Unclassified_Flavobacteriaceae_6_ASV3447	Absence	Presence
47	Unclassified_Flavobacteriaceae_50_ASV3437	Unclassified_Flavobacteriaceae_50_ASV3437	Absence	Presence
48	Unclassified_Flavobacteriaceae_7_ASV3448	Unclassified_Flavobacteriaceae_7_ASV3448	Absence	Presence
49	Unclassified_Flavobacteriaceae_5_ASV3436	Unclassified_Flavobacteriaceae_5_ASV3436	Absence	Presence
50	Unclassified_Flavobacteriaceae_59_ASV3446	Unclassified_Flavobacteriaceae_59_ASV3446	Absence	Presence
51	Unclassified_Flavobacteriaceae_54_ASV3441	Unclassified_Flavobacteriaceae_54_ASV3441	Absence	Presence
52	Gramella_ASV1034	Gramella_ASV1034	Absence	Presence
53	Gramella_ASV1033	Gramella_ASV1033	Absence	Presence
54	Unclassified_Flavobacteriales_4_ASV3454	Unclassified_Flavobacteriales_4_ASV3454	Absence	Presence
55	Unclassified_Flavobacteriaceae_52_ASV3439	Unclassified_Flavobacteriaceae_52_ASV3439	Absence	Presence
56	Unclassified_Flavobacteriaceae_47_ASV3433	Unclassified_Flavobacteriaceae_47_ASV3433	Absence	Presence
57	Unclassified_Flavobacteriaceae_41_ASV3427	Unclassified_Flavobacteriaceae_41_ASV3427	Absence	Presence
58	Bergeyella_ASV310	Bergeyella_ASV310	Absence	Presence
59	Chryseobacterium_ASV550	Chryseobacterium_ASV550	Absence	Presence
60	Bergeyella_ASV314	Bergeyella_ASV314	Absence	Presence
61	Bergeyella_ASV311	Bergeyella_ASV311	Absence	Presence
62	Unclassified_Weeksellaceae_13_ASV4934	Unclassified_Weeksellaceae_13_ASV4934	Absence	Presence
63	Lutibacter_ASV1292	Lutibacter_ASV1292	Absence	Presence
64	Unclassified_Flavobacteriaceae_46_ASV3432	Unclassified_Flavobacteriaceae_46_ASV3432	Absence	Presence
65	Capnocytophaga_ASV492	Capnocytophaga_ASV492	Absence	Presence
66	Anaerophaga_ASV193	Anaerophaga_ASV193	Absence	Presence
67	Alloprevotella_ASV138	Alloprevotella_ASV138	Absence	Presence
68	Alloprevotella_ASV137	Alloprevotella_ASV137	Absence	Presence
69	Parabacteroides_ASV1587	Parabacteroides_ASV1587	Absence	Presence
70	Bacteroides_ASV273	Bacteroides_ASV273	Absence	Presence
71	Unclassified_Cytophagales_3_ASV3208	Unclassified_Cytophagales_3_ASV3208	Absence	Presence
72	Unclassified_Cytophagales_9_ASV3214	Unclassified_Cytophagales_9_ASV3214	Absence	Presence
73	Algoriphagus_ASV121	Algoriphagus_ASV121	Absence	Presence
74	Algoriphagus_ASV124	Algoriphagus_ASV124	Absence	Presence
75	Pseudarcicella_ASV1739	Pseudarcicella_ASV1739	Absence	Presence
76	Unclassified_Microscillaceae_3_ASV3873	Unclassified_Microscillaceae_3_ASV3873	Absence	Presence
77	Unclassified_Cyclobacteriaceae_13_ASV3176	Unclassified_Cyclobacteriaceae_13_ASV3176	Absence	Presence
78	Unclassified_Cyclobacteriaceae_12_ASV3175	Unclassified_Cyclobacteriaceae_12_ASV3175	Absence	Presence
79	Unclassified_Rhodothermaceae_11_ASV4461	Unclassified_Rhodothermaceae_11_ASV4461	Absence	Presence
80	Salinibacter_ASV1979	Salinibacter_ASV1979	Absence	Presence
81	Salinibacter_ASV1985	Salinibacter_ASV1985	Absence	Presence
82	Unclassified_Zixibacteria_17_ASV4981	Unclassified_Zixibacteria_17_ASV4981	Absence	Presence
83	Unclassified_Zixibacteria_8_ASV5000	Unclassified_Zixibacteria_8_ASV5000	Absence	Presence
84	Unclassified_Omnitrophales_1_ASV4015	Unclassified_Omnitrophales_1_ASV4015	Absence	Presence
85	Candidatus_Omnitrophus_ASV460	Candidatus_Omnitrophus_ASV460	Absence	Presence
86	Spirochaeta_2_ASV2205	Spirochaeta_2_ASV2205	Absence	Presence
87	Sediminispirochaeta_ASV2062	Sediminispirochaeta_ASV2062	Absence	Presence
88	Alkalispirochaeta_ASV134	Alkalispirochaeta_ASV134	Absence	Presence
89	Sediminispirochaeta_ASV2063	Sediminispirochaeta_ASV2063	Absence	Presence
90	Sediminispirochaeta_ASV2058	Sediminispirochaeta_ASV2058	Absence	Presence
91	Sediminispirochaeta_ASV2055	Sediminispirochaeta_ASV2055	Absence	Presence
92	GWE2-31-10_ASV1037	GWE2-31-10_ASV1037	Absence	Presence
93	Spirochaeta_2_ASV2183	Spirochaeta_2_ASV2183	Absence	Presence
94	Chlamydia_ASV510	Chlamydia_ASV510	Absence	Presence
95	Unclassified_Parachlamydiaceae_2_ASV4023	Unclassified_Parachlamydiaceae_2_ASV4023	Absence	Presence
96	Unclassified_OM190_6_ASV4011	Unclassified_OM190_6_ASV4011	Absence	Presence
97	Unclassified_Pla4_lineage_6_ASV4179	Unclassified_Pla4_lineage_6_ASV4179	Absence	Presence
98	Urania-1B-19_marine_sediment_group_ASV5023	Urania-1B-19_marine_sediment_group_ASV5023	Absence	Presence
99	Unclassified_Tepidisphaerales_1_ASV4843	Unclassified_Tepidisphaerales_1_ASV4843	Absence	Presence
100	Unclassified_Phycisphaeraceae_6_ASV4119	Unclassified_Phycisphaeraceae_6_ASV4119	Absence	Presence
101	Algisphaera_ASV119	Algisphaera_ASV119	Absence	Presence
102	Unclassified_Phycisphaeraceae_11_ASV4105	Unclassified_Phycisphaeraceae_11_ASV4105	Absence	Presence
103	Gemmata_ASV996	Gemmata_ASV996	Absence	Presence
104	Unclassified_Gemmataceae_4_ASV3565	Unclassified_Gemmataceae_4_ASV3565	Absence	Presence
105	Unclassified_Gemmataceae_7_ASV3568	Unclassified_Gemmataceae_7_ASV3568	Absence	Presence
106	Unclassified_Gemmataceae_2_ASV3563	Unclassified_Gemmataceae_2_ASV3563	Absence	Presence
107	Unclassified_Gemmataceae_6_ASV3567	Unclassified_Gemmataceae_6_ASV3567	Absence	Presence
108	Unclassified_Isosphaeraceae_4_ASV3646	Unclassified_Isosphaeraceae_4_ASV3646	Absence	Presence
109	Unclassified_Isosphaeraceae_8_ASV3650	Unclassified_Isosphaeraceae_8_ASV3650	Absence	Presence
110	Unclassified_Gemmataceae_10_ASV3556	Unclassified_Gemmataceae_10_ASV3556	Absence	Presence
111	Unclassified_Planctomycetales_8_ASV4200	Unclassified_Planctomycetales_8_ASV4200	Absence	Presence
112	Unclassified_Planctomycetales_3_ASV4195	Unclassified_Planctomycetales_3_ASV4195	Absence	Presence
113	Unclassified_Rubinisphaeraceae_1_ASV4484	Unclassified_Rubinisphaeraceae_1_ASV4484	Absence	Presence
114	Rubinisphaera_ASV1935	Rubinisphaera_ASV1935	Absence	Presence
115	Unclassified_Planctomycetales_9_ASV4201	Unclassified_Planctomycetales_9_ASV4201	Absence	Presence
116	Unclassified_Pirellulaceae_17_ASV4133	Unclassified_Pirellulaceae_17_ASV4133	Absence	Presence
117	Unclassified_Pirellulaceae_9_ASV4152	Unclassified_Pirellulaceae_9_ASV4152	Absence	Presence
118	Rhodopirellula_ASV1854	Rhodopirellula_ASV1854	Absence	Presence
119	Pirellula_ASV1693	Pirellula_ASV1693	Absence	Presence
120	Rhodopirellula_ASV1855	Rhodopirellula_ASV1855	Absence	Presence
121	Unclassified_Pirellulaceae_19_ASV4135	Unclassified_Pirellulaceae_19_ASV4135	Absence	Presence
122	Unclassified_Pirellulaceae_20_ASV4137	Unclassified_Pirellulaceae_20_ASV4137	Absence	Presence
123	Unclassified_Pirellulaceae_21_ASV4138	Unclassified_Pirellulaceae_21_ASV4138	Absence	Presence
124	Unclassified_OM190_1_ASV4000	Unclassified_OM190_1_ASV4000	Absence	Presence
125	Unclassified_OM190_4_ASV4009	Unclassified_OM190_4_ASV4009	Absence	Presence
126	Unclassified_BD7-11_1_ASV2871	Unclassified_BD7-11_1_ASV2871	Absence	Presence
127	Unclassified_Vicinamibacteraceae_3_ASV4899	Unclassified_Vicinamibacteraceae_3_ASV4899	Absence	Presence
128	Unclassified_Vicinamibacteraceae_4_ASV4900	Unclassified_Vicinamibacteraceae_4_ASV4900	Absence	Presence
129	Unclassified_Vicinamibacterales_2_ASV4905	Unclassified_Vicinamibacterales_2_ASV4905	Absence	Presence
130	Unclassified_SS1-B-02-17_7_ASV4792	Unclassified_SS1-B-02-17_7_ASV4792	Absence	Presence
131	Unclassified_Methylacidiphilaceae_2_ASV3828	Unclassified_Methylacidiphilaceae_2_ASV3828	Absence	Presence
132	Luteolibacter_ASV1284	Luteolibacter_ASV1284	Absence	Presence
133	Unclassified_DEV007_7_ASV3299	Unclassified_DEV007_7_ASV3299	Absence	Presence
134	Persicirhabdus_ASV1632	Persicirhabdus_ASV1632	Absence	Presence
135	Chthoniobacter_ASV553	Chthoniobacter_ASV553	Absence	Presence
136	Candidatus_Udaeobacter_ASV487	Candidatus_Udaeobacter_ASV487	Absence	Presence
137	Unclassified_DS-100_3_ASV3310	Unclassified_DS-100_3_ASV3310	Absence	Presence
138	Unclassified_Subgroup_7_2_ASV4816	Unclassified_Subgroup_7_2_ASV4816	Absence	Presence
139	Unclassified_SAR324_clade(Marine_group_B)_12_ASV4592	Unclassified_SAR324_clade(Marine_group_B)_12_ASV4592	Absence	Presence
140	RB41_ASV1807	RB41_ASV1807	Absence	Presence
141	Unclassified_Blastocatellaceae_4_ASV2915	Unclassified_Blastocatellaceae_4_ASV2915	Absence	Presence
142	Unclassified_Blastocatellaceae_3_ASV2914	Unclassified_Blastocatellaceae_3_ASV2914	Absence	Presence
143	Unclassified_Blastocatellaceae_7_ASV2918	Unclassified_Blastocatellaceae_7_ASV2918	Absence	Presence
144	Unclassified_C0119_2_ASV2962	Unclassified_C0119_2_ASV2962	Absence	Presence
145	Unclassified_Gitt-GS-136_2_ASV3590	Unclassified_Gitt-GS-136_2_ASV3590	Absence	Presence
146	Unclassified_JG30-KF-CM66_2_ASV3662	Unclassified_JG30-KF-CM66_2_ASV3662	Absence	Presence
147	Unclassified_S085_2_ASV4508	Unclassified_S085_2_ASV4508	Absence	Presence
148	Unclassified_JG30-KF-CM45_1_ASV3656	Unclassified_JG30-KF-CM45_1_ASV3656	Absence	Presence
149	Candidatus_Chlorothrix_ASV424	Candidatus_Chlorothrix_ASV424	Absence	Presence
150	Unclassified_SBR1031_3_ASV4648	Unclassified_SBR1031_3_ASV4648	Absence	Presence
151	Unclassified_SBR1031_35_ASV4654	Unclassified_SBR1031_35_ASV4654	Absence	Presence
152	Unclassified_A4b_15_ASV2436	Unclassified_A4b_15_ASV2436	Absence	Presence
153	Unclassified_A4b_18_ASV2439	Unclassified_A4b_18_ASV2439	Absence	Presence
154	Unclassified_A4b_24_ASV2446	Unclassified_A4b_24_ASV2446	Absence	Presence
155	Unclassified_SBR1031_16_ASV4633	Unclassified_SBR1031_16_ASV4633	Absence	Presence
156	Unclassified_SBR1031_49_ASV4669	Unclassified_SBR1031_49_ASV4669	Absence	Presence
157	Unclassified_SBR1031_70_ASV4693	Unclassified_SBR1031_70_ASV4693	Absence	Presence
158	Unclassified_SBR1031_53_ASV4674	Unclassified_SBR1031_53_ASV4674	Absence	Presence
159	Unclassified_Anaerolineaceae_25_ASV2602	Unclassified_Anaerolineaceae_25_ASV2602	Absence	Presence
160	Unclassified_Ardenticatenales_15_ASV2639	Unclassified_Ardenticatenales_15_ASV2639	Absence	Presence
161	Unclassified_Anaerolineaceae_13_ASV2589	Unclassified_Anaerolineaceae_13_ASV2589	Absence	Presence
162	Unclassified_Anaerolineaceae_36_ASV2614	Unclassified_Anaerolineaceae_36_ASV2614	Absence	Presence
163	Unclassified_C0119_1_ASV2961	Unclassified_C0119_1_ASV2961	Absence	Presence
164	Unclassified_Acidobacteriales_3_ASV2484	Unclassified_Acidobacteriales_3_ASV2484	Absence	Presence
165	Bryobacter_ASV380	Bryobacter_ASV380	Absence	Presence
166	Iamia_ASV1122	Iamia_ASV1122	Absence	Presence
167	Unclassified_Microtrichales_2_ASV3878	Unclassified_Microtrichales_2_ASV3878	Absence	Presence
168	Unclassified_Microtrichaceae_3_ASV3876	Unclassified_Microtrichaceae_3_ASV3876	Absence	Presence
169	Unclassified_Actinomarinales_7_ASV2510	Unclassified_Actinomarinales_7_ASV2510	Absence	Presence
170	Unclassified_Nocardioidaceae_2_ASV3978	Unclassified_Nocardioidaceae_2_ASV3978	Absence	Presence
171	Aeromicrobium_ASV100	Aeromicrobium_ASV100	Absence	Presence
172	Nocardioides_ASV1498	Nocardioides_ASV1498	Absence	Presence
173	Unclassified_PeM15_1_ASV4083	Unclassified_PeM15_1_ASV4083	Absence	Presence
174	Unclassified_Frankiales_2_ASV3457	Unclassified_Frankiales_2_ASV3457	Absence	Presence
175	Nakamurella_ASV1460	Nakamurella_ASV1460	Absence	Presence
176	Unclassified_Pseudonocardiaceae_6_ASV4263	Unclassified_Pseudonocardiaceae_6_ASV4263	Absence	Presence
177	Rhodococcus_ASV1832	Rhodococcus_ASV1832	Absence	Presence
178	Corynebacterium_ASV668	Corynebacterium_ASV668	Absence	Presence
179	Corynebacterium_ASV661	Corynebacterium_ASV661	Absence	Presence
180	Corynebacterium_ASV669	Corynebacterium_ASV669	Absence	Presence
181	Unclassified_Nocardiaceae_1_ASV3976	Unclassified_Nocardiaceae_1_ASV3976	Absence	Presence
182	Mycobacterium_ASV1433	Mycobacterium_ASV1433	Absence	Presence
183	Mycobacterium_ASV1435	Mycobacterium_ASV1435	Absence	Presence
184	Mycobacterium_ASV1420	Mycobacterium_ASV1420	Absence	Presence
185	Micromonospora_ASV1396	Micromonospora_ASV1396	Absence	Presence
186	Unclassified_Microbacteriaceae_8_ASV3853	Unclassified_Microbacteriaceae_8_ASV3853	Absence	Presence
187	Unclassified_Microbacteriaceae_1_ASV3843	Unclassified_Microbacteriaceae_1_ASV3843	Absence	Presence
188	Leucobacter_ASV1250	Leucobacter_ASV1250	Absence	Presence
189	Unclassified_Microbacteriaceae_12_ASV3846	Unclassified_Microbacteriaceae_12_ASV3846	Absence	Presence
190	Unclassified_Micrococcales_6_ASV3866	Unclassified_Micrococcales_6_ASV3866	Absence	Presence
191	Flaviflexus_ASV931	Flaviflexus_ASV931	Absence	Presence
192	Unclassified_Cellulomonadaceae_2_ASV3006	Unclassified_Cellulomonadaceae_2_ASV3006	Absence	Presence
193	Unclassified_Promicromonosporaceae_1_ASV4243	Unclassified_Promicromonosporaceae_1_ASV4243	Absence	Presence
194	Unclassified_Intrasporangiaceae_1_ASV3642	Unclassified_Intrasporangiaceae_1_ASV3642	Absence	Presence
195	Brachybacterium_ASV349	Brachybacterium_ASV349	Absence	Presence
196	Unclassified_Dermacoccaceae_1_ASV3231	Unclassified_Dermacoccaceae_1_ASV3231	Absence	Presence
197	Unclassified_Micrococcaceae_1_ASV3855	Unclassified_Micrococcaceae_1_ASV3855	Absence	Presence
198	Kocuria_ASV1139	Kocuria_ASV1139	Absence	Presence
199	Brevibacterium_ASV358	Brevibacterium_ASV358	Absence	Presence
200	Unclassified_Bogoriellaceae_1_ASV2919	Unclassified_Bogoriellaceae_1_ASV2919	Absence	Presence
201	Actinomadura_ASV74	Actinomadura_ASV74	Absence	Presence
202	Raoultibacter_ASV1800	Raoultibacter_ASV1800	Absence	Presence
203	Unclassified_Coriobacteriales_Incertae_Sedis_1_ASV3137	Unclassified_Coriobacteriales_Incertae_Sedis_1_ASV3137	Absence	Presence
204	YC-ZSS-LKJ147_ASV5113	YC-ZSS-LKJ147_ASV5113	Absence	Presence
205	Unclassified_Longimicrobiaceae_1_ASV3787	Unclassified_Longimicrobiaceae_1_ASV3787	Absence	Presence
206	Unclassified_BD2-11_terrestrial_group_16_ASV2846	Unclassified_BD2-11_terrestrial_group_16_ASV2846	Absence	Presence
207	Unclassified_BD2-11_terrestrial_group_14_ASV2844	Unclassified_BD2-11_terrestrial_group_14_ASV2844	Absence	Presence
208	Unclassified_Gemmatimonadaceae_6_ASV3578	Unclassified_Gemmatimonadaceae_6_ASV3578	Absence	Presence
209	Unclassified_S0134_terrestrial_group_ASV1955	Unclassified_S0134_terrestrial_group_ASV1955	Absence	Presence
210	Unclassified_Bacillales_4_ASV2697	Unclassified_Bacillales_4_ASV2697	Absence	Presence
211	Caldithrix_ASV388	Caldithrix_ASV388	Absence	Presence
212	Caldithrix_ASV390	Caldithrix_ASV390	Absence	Presence
213	Unclassified_Calditrichaceae_8_ASV2980	Unclassified_Calditrichaceae_8_ASV2980	Absence	Presence
214	Unclassified_Calditrichaceae_2_ASV2968	Unclassified_Calditrichaceae_2_ASV2968	Absence	Presence
215	Desulfatiglans_ASV742	Desulfatiglans_ASV742	Absence	Presence
216	Desulfatiglans_ASV745	Desulfatiglans_ASV745	Absence	Presence
217	Unclassified_Myxococcales_1_ASV3916	Unclassified_Myxococcales_1_ASV3916	Absence	Presence
218	Unclassified_PS-B29_1_ASV4245	Unclassified_PS-B29_1_ASV4245	Absence	Presence
219	P3OB-42_ASV1562	P3OB-42_ASV1562	Absence	Presence
220	Unclassified_Sandaracinaceae_12_ASV4515	Unclassified_Sandaracinaceae_12_ASV4515	Absence	Presence
221	Unclassified_NB1-j_9_ASV3944	Unclassified_NB1-j_9_ASV3944	Absence	Presence
222	Unclassified_NB1-j_12_ASV3926	Unclassified_NB1-j_12_ASV3926	Absence	Presence
223	Unclassified_BIrii41_3_ASV2907	Unclassified_BIrii41_3_ASV2907	Absence	Presence
224	Unclassified_BIrii41_7_ASV2911	Unclassified_BIrii41_7_ASV2911	Absence	Presence
225	Unclassified_BIrii41_6_ASV2910	Unclassified_BIrii41_6_ASV2910	Absence	Presence
226	Pajaroellobacter_ASV1579	Pajaroellobacter_ASV1579	Absence	Presence
227	Oceanicaulis_ASV1527	Oceanicaulis_ASV1527	Absence	Presence
228	SWB02_ASV2309	SWB02_ASV2309	Absence	Presence
229	Unclassified_Rhizobiales_3_ASV4325	Unclassified_Rhizobiales_3_ASV4325	Absence	Presence
230	SWB02_ASV2302	SWB02_ASV2302	Absence	Presence
231	SWB02_ASV2303	SWB02_ASV2303	Absence	Presence
232	SWB02_ASV2305	SWB02_ASV2305	Absence	Presence
233	Parvularcula_ASV1605	Parvularcula_ASV1605	Absence	Presence
234	Limibaculum_ASV1267	Limibaculum_ASV1267	Absence	Presence
235	Candidatus_Alysiosphaera_ASV406	Candidatus_Alysiosphaera_ASV406	Absence	Presence
236	Unclassified_Alphaproteobacteria_2_ASV2552	Unclassified_Alphaproteobacteria_2_ASV2552	Absence	Presence
237	Peredibacter_ASV1631	Peredibacter_ASV1631	Absence	Presence
238	Unclassified_Rhizobiaceae_28_ASV4313	Unclassified_Rhizobiaceae_28_ASV4313	Absence	Presence
239	Unclassified_Hyphomonadaceae_11_ASV3629	Unclassified_Hyphomonadaceae_11_ASV3629	Absence	Presence
240	Unclassified_Rhodobacteraceae_97_ASV4444	Unclassified_Rhodobacteraceae_97_ASV4444	Absence	Presence
241	Allorhizobium-Neorhizobium-Pararhizobium-Rhizobium_ASV150	Allorhizobium-Neorhizobium-Pararhizobium-Rhizobium_ASV150	Absence	Presence
242	Unclassified_Rhizobiaceae_18_ASV4302	Unclassified_Rhizobiaceae_18_ASV4302	Absence	Presence
243	Unclassified_Rhizobiaceae_23_ASV4308	Unclassified_Rhizobiaceae_23_ASV4308	Absence	Presence
244	Aureimonas_ASV245	Aureimonas_ASV245	Absence	Presence
245	Allorhizobium-Neorhizobium-Pararhizobium-Rhizobium_ASV147	Allorhizobium-Neorhizobium-Pararhizobium-Rhizobium_ASV147	Absence	Presence
246	Bartonella_ASV279	Bartonella_ASV279	Absence	Presence
247	Unclassified_Rhizobiales_9_ASV4331	Unclassified_Rhizobiales_9_ASV4331	Absence	Presence
248	Unclassified_Rhodobacteraceae_8_ASV4425	Unclassified_Rhodobacteraceae_8_ASV4425	Absence	Presence
249	Rhodomicrobium_ASV1845	Rhodomicrobium_ASV1845	Absence	Presence
250	Unclassified_Methyloligellaceae_1_ASV3833	Unclassified_Methyloligellaceae_1_ASV3833	Absence	Presence
251	Caulobacter_ASV498	Caulobacter_ASV498	Absence	Presence
252	Phreatobacter_ASV1674	Phreatobacter_ASV1674	Absence	Presence
253	Unclassified_Beijerinckiaceae_14_ASV2882	Unclassified_Beijerinckiaceae_14_ASV2882	Absence	Presence
254	Methylobacterium-Methylorubrum_ASV1366	Methylobacterium-Methylorubrum_ASV1366	Absence	Presence
255	Microvirga_ASV1399	Microvirga_ASV1399	Absence	Presence
256	Unclassified_Beijerinckiaceae_15_ASV2883	Unclassified_Beijerinckiaceae_15_ASV2883	Absence	Presence
257	Labrys_ASV1149	Labrys_ASV1149	Absence	Presence
258	Aureimonas_ASV243	Aureimonas_ASV243	Absence	Presence
259	1174-901-12_ASV17	1174-901-12_ASV17	Absence	Presence
260	Rhodomicrobium_ASV1844	Rhodomicrobium_ASV1844	Absence	Presence
261	Devosia_ASV833	Devosia_ASV833	Absence	Presence
262	Unclassified_Rhizobiales_7_ASV4329	Unclassified_Rhizobiales_7_ASV4329	Absence	Presence
263	Hyphomicrobium_ASV1114	Hyphomicrobium_ASV1114	Absence	Presence
264	Bauldia_ASV289	Bauldia_ASV289	Absence	Presence
265	Methylocystis_ASV1378	Methylocystis_ASV1378	Absence	Presence
266	Methylocystis_ASV1377	Methylocystis_ASV1377	Absence	Presence
267	Hyphomicrobium_ASV1117	Hyphomicrobium_ASV1117	Absence	Presence
268	Unclassified_Rhodobacteraceae_69_ASV4413	Unclassified_Rhodobacteraceae_69_ASV4413	Absence	Presence
269	Paracoccus_ASV1595	Paracoccus_ASV1595	Absence	Presence
270	Unclassified_Rhodobacteraceae_49_ASV4391	Unclassified_Rhodobacteraceae_49_ASV4391	Absence	Presence
271	Unclassified_Rhodobacteraceae_65_ASV4409	Unclassified_Rhodobacteraceae_65_ASV4409	Absence	Presence
272	Unclassified_Rhodobacteraceae_94_ASV4441	Unclassified_Rhodobacteraceae_94_ASV4441	Absence	Presence
273	Unclassified_Rhodobacteraceae_95_ASV4442	Unclassified_Rhodobacteraceae_95_ASV4442	Absence	Presence
274	Unclassified_Rhodobacteraceae_47_ASV4389	Unclassified_Rhodobacteraceae_47_ASV4389	Absence	Presence
275	Unclassified_Rhizobiaceae_12_ASV4296	Unclassified_Rhizobiaceae_12_ASV4296	Absence	Presence
276	Unclassified_Puniceispirillales_1_ASV4268	Unclassified_Puniceispirillales_1_ASV4268	Absence	Presence
277	Unclassified_Thalassobaculales_6_ASV4854	Unclassified_Thalassobaculales_6_ASV4854	Absence	Presence
278	Asaia_ASV224	Asaia_ASV224	Absence	Presence
279	Defluviicoccus_ASV723	Defluviicoccus_ASV723	Absence	Presence
280	Ellin6055_ASV859	Ellin6055_ASV859	Absence	Presence
281	Sphingomonas_ASV2140	Sphingomonas_ASV2140	Absence	Presence
282	Sphingomonas_ASV2134	Sphingomonas_ASV2134	Absence	Presence
283	Sphingomonas_ASV2141	Sphingomonas_ASV2141	Absence	Presence
284	Sphingomonas_ASV2136	Sphingomonas_ASV2136	Absence	Presence
285	Sphingoaurantiacus_ASV2112	Sphingoaurantiacus_ASV2112	Absence	Presence
286	Unclassified_Sphingomonadaceae_11_ASV4749	Unclassified_Sphingomonadaceae_11_ASV4749	Absence	Presence
287	Sphingopyxis_ASV2146	Sphingopyxis_ASV2146	Absence	Presence
288	Unclassified_Micavibrionaceae_5_ASV3841	Unclassified_Micavibrionaceae_5_ASV3841	Absence	Presence
289	Sphingobium_ASV2120	Sphingobium_ASV2120	Absence	Presence
290	Unclassified_Desulfuromonadaceae_1_ASV3292	Unclassified_Desulfuromonadaceae_1_ASV3292	Absence	Presence
291	P3OB-42_ASV1570	P3OB-42_ASV1570	Absence	Presence
292	Unclassified_Nannocystaceae_3_ASV3921	Unclassified_Nannocystaceae_3_ASV3921	Absence	Presence
293	Unclassified_Nannocystaceae_4_ASV3922	Unclassified_Nannocystaceae_4_ASV3922	Absence	Presence
294	SEEP-SRB1_ASV2064	SEEP-SRB1_ASV2064	Absence	Presence
295	Unclassified_Sva0485_6_ASV4830	Unclassified_Sva0485_6_ASV4830	Absence	Presence
296	Unclassified_Bradymonadaceae_18_ASV2929	Unclassified_Bradymonadaceae_18_ASV2929	Absence	Presence
297	Unclassified_Bradymonadaceae_13_ASV2924	Unclassified_Bradymonadaceae_13_ASV2924	Absence	Presence
298	Unclassified_Bradymonadaceae_6_ASV2935	Unclassified_Bradymonadaceae_6_ASV2935	Absence	Presence
299	Unclassified_Bradymonadales_9_ASV2954	Unclassified_Bradymonadales_9_ASV2954	Absence	Presence
300	Unclassified_Bradymonadales_4_ASV2949	Unclassified_Bradymonadales_4_ASV2949	Absence	Presence
301	Desulfovibrio_ASV804	Desulfovibrio_ASV804	Absence	Presence
302	Acanthopleuribacter_ASV33	Acanthopleuribacter_ASV33	Absence	Presence
303	Unclassified_Moraxellaceae_3_ASV3902	Unclassified_Moraxellaceae_3_ASV3902	Absence	Presence
304	Candidatus_Competibacter_ASV430	Candidatus_Competibacter_ASV430	Absence	Presence
305	Unclassified_B1-7BS_ASV248	Unclassified_B1-7BS_ASV248	Absence	Presence
306	Unclassified_Comamonadaceae_32_ASV3130	Unclassified_Comamonadaceae_32_ASV3130	Absence	Presence
307	Brachymonas_ASV351	Brachymonas_ASV351	Absence	Presence
308	Unclassified_Comamonadaceae_21_ASV3118	Unclassified_Comamonadaceae_21_ASV3118	Absence	Presence
309	Unclassified_Comamonadaceae_23_ASV3120	Unclassified_Comamonadaceae_23_ASV3120	Absence	Presence
310	Polaromonas_ASV1704	Polaromonas_ASV1704	Absence	Presence
311	Unclassified_Neisseriaceae_8_ASV3955	Unclassified_Neisseriaceae_8_ASV3955	Absence	Presence
312	Unclassified_Neisseriaceae_6_ASV3953	Unclassified_Neisseriaceae_6_ASV3953	Absence	Presence
313	Neisseria_ASV1466	Neisseria_ASV1466	Absence	Presence
314	Neisseria_ASV1467	Neisseria_ASV1467	Absence	Presence
315	Neisseria_ASV1468	Neisseria_ASV1468	Absence	Presence
316	Alysiella_ASV170	Alysiella_ASV170	Absence	Presence
317	Unclassified_Sutterellaceae_1_ASV4823	Unclassified_Sutterellaceae_1_ASV4823	Absence	Presence
318	Achromobacter_ASV42	Achromobacter_ASV42	Absence	Presence
319	Unclassified_Hydrogenophilaceae_5_ASV3625	Unclassified_Hydrogenophilaceae_5_ASV3625	Absence	Presence
320	Unclassified_Nitrosomonadaceae_1_ASV3974	Unclassified_Nitrosomonadaceae_1_ASV3974	Absence	Presence
321	Salinisphaera_ASV2005	Salinisphaera_ASV2005	Absence	Presence
322	Salinisphaera_ASV2004	Salinisphaera_ASV2004	Absence	Presence
323	Salinisphaera_ASV2023	Salinisphaera_ASV2023	Absence	Presence
324	Salinisphaera_ASV2013	Salinisphaera_ASV2013	Absence	Presence
325	Desulfosarcina_ASV796	Desulfosarcina_ASV796	Absence	Presence
326	Sva0081_sediment_group_ASV2297	Sva0081_sediment_group_ASV2297	Absence	Presence
327	Sva0081_sediment_group_ASV2287	Sva0081_sediment_group_ASV2287	Absence	Presence
328	Desulfocella_ASV782	Desulfocella_ASV782	Absence	Presence
329	Desulfocella_ASV778	Desulfocella_ASV778	Absence	Presence
330	Unclassified_Gammaproteobacteria_7_ASV3528	Unclassified_Gammaproteobacteria_7_ASV3528	Absence	Presence
331	Unclassified_Gammaproteobacteria_39_ASV3494	Unclassified_Gammaproteobacteria_39_ASV3494	Absence	Presence
332	Silanimonas_ASV2087	Silanimonas_ASV2087	Absence	Presence
333	Stenotrophomonas_ASV2224	Stenotrophomonas_ASV2224	Absence	Presence
334	Unclassified_Xanthomonadaceae_2_ASV4963	Unclassified_Xanthomonadaceae_2_ASV4963	Absence	Presence
335	Pseudoxanthomonas_ASV1782	Pseudoxanthomonas_ASV1782	Absence	Presence
336	Rhodanobacter_ASV1822	Rhodanobacter_ASV1822	Absence	Presence
337	Rhodanobacter_ASV1819	Rhodanobacter_ASV1819	Absence	Presence
338	Unclassified_Rhodanobacteraceae_5_ASV4344	Unclassified_Rhodanobacteraceae_5_ASV4344	Absence	Presence
339	Tahibacter_ASV2318	Tahibacter_ASV2318	Absence	Presence
340	Unclassified_Gammaproteobacteria_26_ASV3480	Unclassified_Gammaproteobacteria_26_ASV3480	Absence	Presence
341	Unclassified_Wohlfahrtiimonadaceae_3_ASV4949	Unclassified_Wohlfahrtiimonadaceae_3_ASV4949	Absence	Presence
342	Unclassified_Wohlfahrtiimonadaceae_2_ASV4948	Unclassified_Wohlfahrtiimonadaceae_2_ASV4948	Absence	Presence
343	Unclassified_Wohlfahrtiimonadaceae_1_ASV4947	Unclassified_Wohlfahrtiimonadaceae_1_ASV4947	Absence	Presence
344	Unclassified_Gammaproteobacteria_17_ASV3470	Unclassified_Gammaproteobacteria_17_ASV3470	Absence	Presence
345	Unclassified_UBA10353_marine_group_ASV2401	Unclassified_UBA10353_marine_group_ASV2401	Absence	Presence
346	Unclassified_Gammaproteobacteria_47_ASV3503	Unclassified_Gammaproteobacteria_47_ASV3503	Absence	Presence
347	Unclassified_Gammaproteobacteria_15_ASV3468	Unclassified_Gammaproteobacteria_15_ASV3468	Absence	Presence
348	Unclassified_Chromatiaceae_15_ASV3058	Unclassified_Chromatiaceae_15_ASV3058	Absence	Presence
349	Woeseia_ASV5102	Woeseia_ASV5102	Absence	Presence
350	Marinomonas_ASV1320	Marinomonas_ASV1320	Absence	Presence
351	Saccharospirillum_ASV1965	Saccharospirillum_ASV1965	Absence	Presence
352	Pseudomonas_ASV1758	Pseudomonas_ASV1758	Absence	Presence
353	Pseudomonas_ASV1770	Pseudomonas_ASV1770	Absence	Presence
354	Marinimicrobium_ASV1306	Marinimicrobium_ASV1306	Absence	Presence
355	Cellvibrio_ASV505	Cellvibrio_ASV505	Absence	Presence
356	Unclassified_Steroidobacteraceae_1_ASV4799	Unclassified_Steroidobacteraceae_1_ASV4799	Absence	Presence
357	Unclassified_Gammaproteobacteria_60_ASV3518	Unclassified_Gammaproteobacteria_60_ASV3518	Absence	Presence
358	Unclassified_Enterobacterales_4_ASV3323	Unclassified_Enterobacterales_4_ASV3323	Absence	Presence
359	Gilliamella_ASV1014	Gilliamella_ASV1014	Absence	Presence
360	Phocoenobacter_ASV1657	Phocoenobacter_ASV1657	Absence	Presence
361	Unclassified_Pasteurellaceae_8_ASV4053	Unclassified_Pasteurellaceae_8_ASV4053	Absence	Presence
362	Unclassified_Pasteurellaceae_2_ASV4047	Unclassified_Pasteurellaceae_2_ASV4047	Absence	Presence
363	Unclassified_Pasteurellaceae_9_ASV4054	Unclassified_Pasteurellaceae_9_ASV4054	Absence	Presence
364	Unclassified_Pasteurellaceae_11_ASV4046	Unclassified_Pasteurellaceae_11_ASV4046	Absence	Presence
365	Pasteurella_ASV1606	Pasteurella_ASV1606	Absence	Presence
366	Pasteurella_ASV1607	Pasteurella_ASV1607	Absence	Presence
367	Arsenophonus_ASV217	Arsenophonus_ASV217	Absence	Presence
368	Agarivorans_ASV104	Agarivorans_ASV104	Absence	Presence
369	Unclassified_Pectobacteriaceae_2_ASV4075	Unclassified_Pectobacteriaceae_2_ASV4075	Absence	Presence
370	Unclassified_Yersiniaceae_2_ASV4970	Unclassified_Yersiniaceae_2_ASV4970	Absence	Presence
371	Escherichia-Shigella_ASV900	Escherichia-Shigella_ASV900	Absence	Presence
372	Escherichia-Shigella_ASV899	Escherichia-Shigella_ASV899	Absence	Presence
373	Escherichia-Shigella_ASV906	Escherichia-Shigella_ASV906	Absence	Presence
374	Escherichia-Shigella_ASV905	Escherichia-Shigella_ASV905	Absence	Presence
375	Escherichia-Shigella_ASV904	Escherichia-Shigella_ASV904	Absence	Presence
376	Unclassified_Enterobacteriaceae_16_ASV3333	Unclassified_Enterobacteriaceae_16_ASV3333	Absence	Presence
377	Unclassified_Enterobacterales_2_ASV3321	Unclassified_Enterobacterales_2_ASV3321	Absence	Presence
378	Unclassified_Enterobacteriaceae_3_ASV3340	Unclassified_Enterobacteriaceae_3_ASV3340	Absence	Presence
379	Unclassified_Erwiniaceae_7_ASV3362	Unclassified_Erwiniaceae_7_ASV3362	Absence	Presence
380	Kosakonia_ASV1145	Kosakonia_ASV1145	Absence	Presence
381	Unclassified_Enterobacteriaceae_2_ASV3337	Unclassified_Enterobacteriaceae_2_ASV3337	Absence	Presence
382	Unclassified_Enterobacteriaceae_20_ASV3338	Unclassified_Enterobacteriaceae_20_ASV3338	Absence	Presence
383	Unclassified_Enterobacteriaceae_8_ASV3345	Unclassified_Enterobacteriaceae_8_ASV3345	Absence	Presence
384	Unclassified_Enterobacteriaceae_7_ASV3344	Unclassified_Enterobacteriaceae_7_ASV3344	Absence	Presence
385	Serratia_ASV2071	Serratia_ASV2071	Absence	Presence
386	Unclassified_Morganellaceae_2_ASV3904	Unclassified_Morganellaceae_2_ASV3904	Absence	Presence
387	9M32_ASV24	9M32_ASV24	Absence	Presence
388	Psychrobacter_ASV1784	Psychrobacter_ASV1784	Absence	Presence
389	Psychrobacter_ASV1783	Psychrobacter_ASV1783	Absence	Presence
390	Unclassified_Halieaceae_5_ASV3602	Unclassified_Halieaceae_5_ASV3602	Absence	Presence
391	BD1-7_clade_ASV291	BD1-7_clade_ASV291	Absence	Presence
392	BIyi10_ASV320	BIyi10_ASV320	Absence	Presence
393	Halomonas_ASV1078	Halomonas_ASV1078	Absence	Presence
394	Halomonas_ASV1074	Halomonas_ASV1074	Absence	Presence
395	Alcanivorax_ASV111	Alcanivorax_ASV111	Absence	Presence
396	Alcanivorax_ASV110	Alcanivorax_ASV110	Absence	Presence
397	Unclassified_Gammaproteobacteria_49_ASV3505	Unclassified_Gammaproteobacteria_49_ASV3505	Absence	Presence
398	Unclassified_EPR3968-O8a-Bc78_7_ASV3353	Unclassified_EPR3968-O8a-Bc78_7_ASV3353	Absence	Presence
399	Unclassified_EPR3968-O8a-Bc78_8_ASV3354	Unclassified_EPR3968-O8a-Bc78_8_ASV3354	Absence	Presence
400	Unclassified_Nitrosococcaceae_9_ASV3973	Unclassified_Nitrosococcaceae_9_ASV3973	Absence	Presence
401	Unclassified_Gammaproteobacteria_74_ASV3533	Unclassified_Gammaproteobacteria_74_ASV3533	Absence	Presence
402	Unclassified_Gammaproteobacteria_67_ASV3525	Unclassified_Gammaproteobacteria_67_ASV3525	Absence	Presence
403	Unclassified_Gammaproteobacteria_37_ASV3492	Unclassified_Gammaproteobacteria_37_ASV3492	Absence	Presence
404	Unknown_Family_Gammaproteobacteria_Incertae_Sedis_2_ASV5012	Unknown_Family_Gammaproteobacteria_Incertae_Sedis_2_ASV5012	Absence	Presence
405	Wenzhouxiangella_ASV5088	Wenzhouxiangella_ASV5088	Absence	Presence
406	AqS1_ASV200	AqS1_ASV200	Absence	Presence
407	Unclassified_Nitrosococcaceae_1_ASV3964	Unclassified_Nitrosococcaceae_1_ASV3964	Absence	Presence
408	Methylophaga_ASV1388	Methylophaga_ASV1388	Absence	Presence
409	Candidatus_Thiobios_ASV478	Candidatus_Thiobios_ASV478	Absence	Presence
410	Aquicella_ASV206	Aquicella_ASV206	Absence	Presence
411	Unclassified_Diplorickettsiaceae_1_ASV3304	Unclassified_Diplorickettsiaceae_1_ASV3304	Absence	Presence
412	Candidatus_Berkiella_ASV412	Candidatus_Berkiella_ASV412	Absence	Presence
413	Unknown_Family_Gammaproteobacteria_Incertae_Sedis_8_ASV5018	Unknown_Family_Gammaproteobacteria_Incertae_Sedis_8_ASV5018	Absence	Presence
414	Legionella_ASV1228	Legionella_ASV1228	Absence	Presence
415	Unclassified_Campylobacterales_4_ASV2988	Unclassified_Campylobacterales_4_ASV2988	Absence	Presence
416	Campylobacter_ASV403	Campylobacter_ASV403	Absence	Presence
417	Unclassified_Candidatus_Woesebacteria_2_ASV2993	Unclassified_Candidatus_Woesebacteria_2_ASV2993	Absence	Presence
418	Unclassified_Gracilibacteria_6_ASV3597	Unclassified_Gracilibacteria_6_ASV3597	Absence	Presence
419	Unclassified_Gracilibacteria_3_ASV3594	Unclassified_Gracilibacteria_3_ASV3594	Absence	Presence
420	Unclassified_Parcubacteria_1_ASV4027	Unclassified_Parcubacteria_1_ASV4027	Absence	Presence
421	Candidatus_Paceibacter_ASV461	Candidatus_Paceibacter_ASV461	Absence	Presence
422	Mycoplasma_ASV1443	Mycoplasma_ASV1443	Absence	Presence
423	Mycoplasma_ASV1437	Mycoplasma_ASV1437	Absence	Presence
424	Mycoplasma_ASV1448	Mycoplasma_ASV1448	Absence	Presence
425	Deinococcus_ASV731	Deinococcus_ASV731	Absence	Presence
426	Truepera_ASV2381	Truepera_ASV2381	Absence	Presence
427	Truepera_ASV2387	Truepera_ASV2387	Absence	Presence
428	Truepera_ASV2380	Truepera_ASV2380	Absence	Presence
429	Leptotrichia_ASV1244	Leptotrichia_ASV1244	Absence	Presence
430	Unclassified_Fusobacteriaceae_1_ASV3460	Unclassified_Fusobacteriaceae_1_ASV3460	Absence	Presence
431	Fusobacterium_ASV976	Fusobacterium_ASV976	Absence	Presence
432	Fusobacterium_ASV977	Fusobacterium_ASV977	Absence	Presence
433	Fusobacterium_ASV978	Fusobacterium_ASV978	Absence	Presence
434	Facklamia_ASV913	Facklamia_ASV913	Absence	Presence
435	Atopostipes_ASV230	Atopostipes_ASV230	Absence	Presence
436	Facklamia_ASV912	Facklamia_ASV912	Absence	Presence
437	Unclassified_Lactobacillales_2_ASV3722	Unclassified_Lactobacillales_2_ASV3722	Absence	Presence
438	Granulicatella_ASV1036	Granulicatella_ASV1036	Absence	Presence
439	Staphylococcus_ASV2219	Staphylococcus_ASV2219	Absence	Presence
440	Kurthia_ASV1147	Kurthia_ASV1147	Absence	Presence
441	Unclassified_Bacillales_1_ASV2694	Unclassified_Bacillales_1_ASV2694	Absence	Presence
442	Gemella_ASV989	Gemella_ASV989	Absence	Presence
443	Gemella_ASV994	Gemella_ASV994	Absence	Presence
444	Marinococcus_ASV1319	Marinococcus_ASV1319	Absence	Presence
445	Bacillus_ASV263	Bacillus_ASV263	Absence	Presence
446	Unclassified_Bacillaceae_16_ASV2684	Unclassified_Bacillaceae_16_ASV2684	Absence	Presence
447	Unclassified_Bacillaceae_6_ASV2690	Unclassified_Bacillaceae_6_ASV2690	Absence	Presence
448	Unclassified_Bacillaceae_5_ASV2689	Unclassified_Bacillaceae_5_ASV2689	Absence	Presence
449	Oceanobacillus_ASV1533	Oceanobacillus_ASV1533	Absence	Presence
450	Virgibacillus_ASV5073	Virgibacillus_ASV5073	Absence	Presence
451	Unclassified_Bacillaceae_9_ASV2693	Unclassified_Bacillaceae_9_ASV2693	Absence	Presence
452	Oceanobacillus_ASV1531	Oceanobacillus_ASV1531	Absence	Presence
453	Fructobacillus_ASV967	Fructobacillus_ASV967	Absence	Presence
454	Weissella_ASV5086	Weissella_ASV5086	Absence	Presence
455	Weissella_ASV5080	Weissella_ASV5080	Absence	Presence
456	Weissella_ASV5087	Weissella_ASV5087	Absence	Presence
457	Companilactobacillus_ASV642	Companilactobacillus_ASV642	Absence	Presence
458	Limosilactobacillus_ASV1271	Limosilactobacillus_ASV1271	Absence	Presence
459	Unclassified_Lactobacillaceae_7_ASV3720	Unclassified_Lactobacillaceae_7_ASV3720	Absence	Presence
460	Unclassified_Lactobacillaceae_3_ASV3716	Unclassified_Lactobacillaceae_3_ASV3716	Absence	Presence
461	Fructilactobacillus_ASV964	Fructilactobacillus_ASV964	Absence	Presence
462	Lactiplantibacillus_ASV1173	Lactiplantibacillus_ASV1173	Absence	Presence
463	Levilactobacillus_ASV1258	Levilactobacillus_ASV1258	Absence	Presence
464	Apilactobacillus_ASV196	Apilactobacillus_ASV196	Absence	Presence
465	Unclassified_Nodosilineaceae_3_ASV3981	Unclassified_Nodosilineaceae_3_ASV3981	Absence	Presence
466	Dactylococcopsis_PCC-8305_ASV716	Dactylococcopsis_PCC-8305_ASV716	Absence	Presence
467	Coleofasciculus_PCC-7420_ASV632	Coleofasciculus_PCC-7420_ASV632	Absence	Presence
468	Unclassified_Cyanobacteriales_9_ASV3167	Unclassified_Cyanobacteriales_9_ASV3167	Absence	Presence
469	Cyanobium_PCC-6307_ASV693	Cyanobium_PCC-6307_ASV693	Absence	Presence
470	Unclassified_Obscuribacteraceae_2_ASV3990	Unclassified_Obscuribacteraceae_2_ASV3990	Absence	Presence
471	Unclassified_Obscuribacteraceae_1_ASV3989	Unclassified_Obscuribacteraceae_1_ASV3989	Absence	Presence
472	Negativicoccus_ASV1464	Negativicoccus_ASV1464	Absence	Presence
473	Erysipelatoclostridium_ASV880	Erysipelatoclostridium_ASV880	Absence	Presence
474	Erysipelothrix_ASV883	Erysipelothrix_ASV883	Absence	Presence
475	Unclassified_Erysipelotrichaceae_2_ASV3366	Unclassified_Erysipelotrichaceae_2_ASV3366	Absence	Presence
476	Streptococcus_ASV2248	Streptococcus_ASV2248	Absence	Presence
477	Streptococcus_ASV2247	Streptococcus_ASV2247	Absence	Presence
478	Streptococcus_ASV2254	Streptococcus_ASV2254	Absence	Presence
479	Streptococcus_ASV2239	Streptococcus_ASV2239	Absence	Presence
480	Mycoplasma_ASV1444	Mycoplasma_ASV1444	Absence	Presence
481	Ureaplasma_ASV5032	Ureaplasma_ASV5032	Absence	Presence
482	Ureaplasma_ASV5031	Ureaplasma_ASV5031	Absence	Presence
483	Weissella_ASV5082	Weissella_ASV5082	Absence	Presence
484	Mesoplasma_ASV1351	Mesoplasma_ASV1351	Absence	Presence
485	Unclassified_RF39_15_ASV4276	Unclassified_RF39_15_ASV4276	Absence	Presence
486	Unclassified_RF39_14_ASV4275	Unclassified_RF39_14_ASV4275	Absence	Presence
487	Unclassified_Anaerovoracaceae_2_ASV2627	Unclassified_Anaerovoracaceae_2_ASV2627	Absence	Presence
488	Unclassified_Anaerovoracaceae_1_ASV2626	Unclassified_Anaerovoracaceae_1_ASV2626	Absence	Presence
489	Helcococcus_ASV1079	Helcococcus_ASV1079	Absence	Presence
490	Peptoniphilus_ASV1620	Peptoniphilus_ASV1620	Absence	Presence
491	Tissierella_ASV2365	Tissierella_ASV2365	Absence	Presence
492	Unclassified_Family_XI_1_ASV3377	Unclassified_Family_XI_1_ASV3377	Absence	Presence
493	ZOR0006_ASV5117	ZOR0006_ASV5117	Absence	Presence
494	Halanaerobium_ASV1048	Halanaerobium_ASV1048	Absence	Presence
495	Unclassified_Christensenellaceae_4_ASV3049	Unclassified_Christensenellaceae_4_ASV3049	Absence	Presence
496	Unclassified_Peptococcaceae_1_ASV4093	Unclassified_Peptococcaceae_1_ASV4093	Absence	Presence
497	Paenibacillus_ASV1576	Paenibacillus_ASV1576	Absence	Presence
498	Unclassified_Christensenellaceae_5_ASV3050	Unclassified_Christensenellaceae_5_ASV3050	Absence	Presence
499	Unclassified_Christensenellaceae_1_ASV3046	Unclassified_Christensenellaceae_1_ASV3046	Absence	Presence
500	Unclassified_Peptostreptococcales-Tissierellales_1_ASV4101	Unclassified_Peptostreptococcales-Tissierellales_1_ASV4101	Absence	Presence
501	Fusibacter_ASV973	Fusibacter_ASV973	Absence	Presence
502	Fusibacter_ASV970	Fusibacter_ASV970	Absence	Presence
503	Fusibacter_ASV974	Fusibacter_ASV974	Absence	Presence
504	Romboutsia_ASV1897	Romboutsia_ASV1897	Absence	Presence
505	Unclassified_Peptostreptococcaceae_2_ASV4098	Unclassified_Peptostreptococcaceae_2_ASV4098	Absence	Presence
506	Unclassified_Clostridia_UCG-014_8_ASV3096	Unclassified_Clostridia_UCG-014_8_ASV3096	Absence	Presence
507	Unclassified_Lachnospiraceae_25_ASV3699	Unclassified_Lachnospiraceae_25_ASV3699	Absence	Presence
508	Epulopiscium_ASV875	Epulopiscium_ASV875	Absence	Presence
509	Lachnospiraceae_NK4A136_group_ASV1165	Lachnospiraceae_NK4A136_group_ASV1165	Absence	Presence
510	Unclassified_Lachnospiraceae_15_ASV3688	Unclassified_Lachnospiraceae_15_ASV3688	Absence	Presence
511	Unclassified_Lachnospiraceae_9_ASV3712	Unclassified_Lachnospiraceae_9_ASV3712	Absence	Presence
512	Lachnoclostridium_ASV1159	Lachnoclostridium_ASV1159	Absence	Presence
513	Unclassified_Lachnospiraceae_22_ASV3696	Unclassified_Lachnospiraceae_22_ASV3696	Absence	Presence
514	Lachnoclostridium_ASV1154	Lachnoclostridium_ASV1154	Absence	Presence
515	Unclassified_Ruminococcaceae_16_ASV4496	Unclassified_Ruminococcaceae_16_ASV4496	Absence	Presence
516	Ruminiclostridium_ASV1950	Ruminiclostridium_ASV1950	Absence	Presence
517	Clostridium_sensu_stricto_1_ASV588	Clostridium_sensu_stricto_1_ASV588	Absence	Presence
518	Clostridium_sensu_stricto_1_ASV594	Clostridium_sensu_stricto_1_ASV594	Absence	Presence
519	Clostridium_sensu_stricto_1_ASV586	Clostridium_sensu_stricto_1_ASV586	Absence	Presence
520	Clostridium_sensu_stricto_1_ASV613	Clostridium_sensu_stricto_1_ASV613	Absence	Presence
521	Clostridium_sensu_stricto_1_ASV607	Clostridium_sensu_stricto_1_ASV607	Absence	Presence
522	Clostridium_sensu_stricto_1_ASV615	Clostridium_sensu_stricto_1_ASV615	Absence	Presence
523	Clostridium_sensu_stricto_1_ASV618	Clostridium_sensu_stricto_1_ASV618	Absence	Presence
524	Clostridium_sensu_stricto_1_ASV599	Clostridium_sensu_stricto_1_ASV599	Absence	Presence
525	Clostridium_sensu_stricto_1_ASV592	Clostridium_sensu_stricto_1_ASV592	Absence	Presence
526	Clostridium_sensu_stricto_1_ASV626	Clostridium_sensu_stricto_1_ASV626	Absence	Presence
527	Clostridium_sensu_stricto_1_ASV566	Clostridium_sensu_stricto_1_ASV566	Absence	Presence
528	Clostridium_sensu_stricto_1_ASV584	Clostridium_sensu_stricto_1_ASV584	Absence	Presence
529	Hirschia_ASV1093	Hirschia_ASV1093	Absence	Presence
530	Christensenellaceae_R-7_group_ASV528	Christensenellaceae_R-7_group_ASV528	Absence	Presence
531	Unclassified_Clostridia_6_ASV3084	Unclassified_Clostridia_6_ASV3084	Absence	Presence
532	Ruminococcus_ASV1951	Ruminococcus_ASV1951	Absence	Presence
533	Unclassified_Thiomicrospiraceae_1_ASV4858	Unclassified_Thiomicrospiraceae_1_ASV4858	Absence	Presence

## Sheet: Structural_zero_male_BKA_high
	Taxon	species	Low	High
1	Sumerlaea_ASV2278	Sumerlaea_ASV2278	Presence	Absence
2	Sumerlaea_ASV2280	Sumerlaea_ASV2280	Presence	Absence
3	Sumerlaea_ASV2282	Sumerlaea_ASV2282	Presence	Absence
4	Sumerlaea_ASV2279	Sumerlaea_ASV2279	Presence	Absence
5	Sumerlaea_ASV2277	Sumerlaea_ASV2277	Presence	Absence
6	Sumerlaea_ASV2276	Sumerlaea_ASV2276	Presence	Absence
7	Unclassified_Beijerinckiaceae_17_ASV2885	Unclassified_Beijerinckiaceae_17_ASV2885	Presence	Absence
8	Unclassified_MD2902-B12_ASV1341	Unclassified_MD2902-B12_ASV1341	Presence	Absence
9	Unclassified_LCP-89_3_ASV3747	Unclassified_LCP-89_3_ASV3747	Presence	Absence
10	Unclassified_LCP-89_1_ASV3745	Unclassified_LCP-89_1_ASV3745	Presence	Absence
11	Unclassified_LCP-89_6_ASV3750	Unclassified_LCP-89_6_ASV3750	Presence	Absence
12	Unclassified_Zixibacteria_23_ASV4988	Unclassified_Zixibacteria_23_ASV4988	Presence	Absence
13	Unclassified_CK-2C2-2_2_ASV3078	Unclassified_CK-2C2-2_2_ASV3078	Presence	Absence
14	Unclassified_Calditrichaceae_9_ASV2982	Unclassified_Calditrichaceae_9_ASV2982	Presence	Absence
15	Unclassified_Calditrichaceae_7_ASV2978	Unclassified_Calditrichaceae_7_ASV2978	Presence	Absence
16	Unclassified_Calditrichaceae_5_ASV2974	Unclassified_Calditrichaceae_5_ASV2974	Presence	Absence
17	Unclassified_Calditrichaceae_6_ASV2976	Unclassified_Calditrichaceae_6_ASV2976	Presence	Absence
18	Unclassified_Calditrichaceae_4_ASV2972	Unclassified_Calditrichaceae_4_ASV2972	Presence	Absence
19	Unclassified_Firmicutes_5_ASV3390	Unclassified_Firmicutes_5_ASV3390	Presence	Absence
20	Thermosinus_ASV2353	Thermosinus_ASV2353	Presence	Absence
21	Thermosinus_ASV2352	Thermosinus_ASV2352	Presence	Absence
22	Unclassified_Firmicutes_4_ASV3389	Unclassified_Firmicutes_4_ASV3389	Presence	Absence
23	Unclassified_Calditrichaceae_8_ASV2981	Unclassified_Calditrichaceae_8_ASV2981	Presence	Absence
24	Unclassified_Firmicutes_2_ASV3387	Unclassified_Firmicutes_2_ASV3387	Presence	Absence
25	Unclassified_Fibrobacterales_4_ASV3383	Unclassified_Fibrobacterales_4_ASV3383	Presence	Absence
26	Unclassified_MAT-CR-H6-H10_2_ASV3818	Unclassified_MAT-CR-H6-H10_2_ASV3818	Presence	Absence
27	Unclassified_09D2Z48_ASV14	Unclassified_09D2Z48_ASV14	Presence	Absence
28	Unclassified_Fibrobacterales_2_ASV3381	Unclassified_Fibrobacterales_2_ASV3381	Presence	Absence
29	Unclassified_Fibrobacterales_1_ASV3380	Unclassified_Fibrobacterales_1_ASV3380	Presence	Absence
30	Unclassified_MAT-CR-H6-H10_3_ASV3819	Unclassified_MAT-CR-H6-H10_3_ASV3819	Presence	Absence
31	Unclassified_MAT-CR-H6-H10_1_ASV3817	Unclassified_MAT-CR-H6-H10_1_ASV3817	Presence	Absence
32	SM23-31_ASV2100	SM23-31_ASV2100	Presence	Absence
33	Ignavibacterium_ASV1125	Ignavibacterium_ASV1125	Presence	Absence
34	Unclassified_Melioribacteraceae_1_ASV3826	Unclassified_Melioribacteraceae_1_ASV3826	Presence	Absence
35	Melioribacter_ASV1342	Melioribacter_ASV1342	Presence	Absence
36	IheB3-7_ASV1126	IheB3-7_ASV1126	Presence	Absence
37	Unclassified_Latescibacterota_8_ASV3743	Unclassified_Latescibacterota_8_ASV3743	Presence	Absence
38	Unclassified_Kapabacteriales_1_ASV3667	Unclassified_Kapabacteriales_1_ASV3667	Presence	Absence
39	Unclassified_Kapabacteriales_4_ASV3670	Unclassified_Kapabacteriales_4_ASV3670	Presence	Absence
40	Unclassified_Kapabacteriales_2_ASV3668	Unclassified_Kapabacteriales_2_ASV3668	Presence	Absence
41	Unclassified_Balneolaceae_82_ASV2837	Unclassified_Balneolaceae_82_ASV2837	Presence	Absence
42	Unclassified_Balneolaceae_18_ASV2766	Unclassified_Balneolaceae_18_ASV2766	Presence	Absence
43	Unclassified_Balneolaceae_58_ASV2810	Unclassified_Balneolaceae_58_ASV2810	Presence	Absence
44	Unclassified_Balneolaceae_68_ASV2821	Unclassified_Balneolaceae_68_ASV2821	Presence	Absence
45	Unclassified_Balneolaceae_53_ASV2805	Unclassified_Balneolaceae_53_ASV2805	Presence	Absence
46	Unclassified_Balneolaceae_79_ASV2833	Unclassified_Balneolaceae_79_ASV2833	Presence	Absence
47	Unclassified_Balneolaceae_43_ASV2794	Unclassified_Balneolaceae_43_ASV2794	Presence	Absence
48	Unclassified_Balneolaceae_27_ASV2776	Unclassified_Balneolaceae_27_ASV2776	Presence	Absence
49	Unclassified_Balneolaceae_75_ASV2829	Unclassified_Balneolaceae_75_ASV2829	Presence	Absence
50	Unclassified_Balneolaceae_7_ASV2823	Unclassified_Balneolaceae_7_ASV2823	Presence	Absence
51	Unclassified_Balneolaceae_57_ASV2809	Unclassified_Balneolaceae_57_ASV2809	Presence	Absence
52	Unclassified_Balneolaceae_72_ASV2826	Unclassified_Balneolaceae_72_ASV2826	Presence	Absence
53	Unclassified_Balneolaceae_42_ASV2793	Unclassified_Balneolaceae_42_ASV2793	Presence	Absence
54	Unclassified_Balneolaceae_74_ASV2828	Unclassified_Balneolaceae_74_ASV2828	Presence	Absence
55	Unclassified_Balneolaceae_11_ASV2759	Unclassified_Balneolaceae_11_ASV2759	Presence	Absence
56	Unclassified_Balneolaceae_80_ASV2835	Unclassified_Balneolaceae_80_ASV2835	Presence	Absence
57	Unclassified_Balneolaceae_15_ASV2763	Unclassified_Balneolaceae_15_ASV2763	Presence	Absence
58	Unclassified_Balneolaceae_26_ASV2775	Unclassified_Balneolaceae_26_ASV2775	Presence	Absence
59	Unclassified_Balneolaceae_33_ASV2783	Unclassified_Balneolaceae_33_ASV2783	Presence	Absence
60	Unclassified_Balneolaceae_51_ASV2803	Unclassified_Balneolaceae_51_ASV2803	Presence	Absence
61	Unclassified_Balneolaceae_66_ASV2819	Unclassified_Balneolaceae_66_ASV2819	Presence	Absence
62	Unclassified_Balneolaceae_28_ASV2777	Unclassified_Balneolaceae_28_ASV2777	Presence	Absence
63	Unclassified_Balneolaceae_56_ASV2808	Unclassified_Balneolaceae_56_ASV2808	Presence	Absence
64	Unclassified_Balneolaceae_39_ASV2789	Unclassified_Balneolaceae_39_ASV2789	Presence	Absence
65	Unclassified_Balneolaceae_17_ASV2765	Unclassified_Balneolaceae_17_ASV2765	Presence	Absence
66	Unclassified_Balneolaceae_44_ASV2795	Unclassified_Balneolaceae_44_ASV2795	Presence	Absence
67	Unclassified_Balneolaceae_63_ASV2816	Unclassified_Balneolaceae_63_ASV2816	Presence	Absence
68	Unclassified_Balneolaceae_22_ASV2771	Unclassified_Balneolaceae_22_ASV2771	Presence	Absence
69	Gracilimonas_ASV1027	Gracilimonas_ASV1027	Presence	Absence
70	Gracilimonas_ASV1030	Gracilimonas_ASV1030	Presence	Absence
71	Gracilimonas_ASV1029	Gracilimonas_ASV1029	Presence	Absence
72	Gracilimonas_ASV1028	Gracilimonas_ASV1028	Presence	Absence
73	Unclassified_Balneolaceae_29_ASV2778	Unclassified_Balneolaceae_29_ASV2778	Presence	Absence
74	Unclassified_Balneolaceae_36_ASV2786	Unclassified_Balneolaceae_36_ASV2786	Presence	Absence
75	Unclassified_Balneolaceae_23_ASV2772	Unclassified_Balneolaceae_23_ASV2772	Presence	Absence
76	Unclassified_Balneolaceae_19_ASV2767	Unclassified_Balneolaceae_19_ASV2767	Presence	Absence
77	Unclassified_Balneolaceae_5_ASV2801	Unclassified_Balneolaceae_5_ASV2801	Presence	Absence
78	Unclassified_Balneolaceae_38_ASV2788	Unclassified_Balneolaceae_38_ASV2788	Presence	Absence
79	Unclassified_Balneolaceae_73_ASV2827	Unclassified_Balneolaceae_73_ASV2827	Presence	Absence
80	Unclassified_Balneolaceae_67_ASV2820	Unclassified_Balneolaceae_67_ASV2820	Presence	Absence
81	Unclassified_Balneolaceae_10_ASV2758	Unclassified_Balneolaceae_10_ASV2758	Presence	Absence
82	Unclassified_Balneolaceae_1_ASV2757	Unclassified_Balneolaceae_1_ASV2757	Presence	Absence
83	MAT-CR-P4-C12_ASV1338	MAT-CR-P4-C12_ASV1338	Presence	Absence
84	MAT-CR-P4-C12_ASV1339	MAT-CR-P4-C12_ASV1339	Presence	Absence
85	Unclassified_Balneolaceae_12_ASV2760	Unclassified_Balneolaceae_12_ASV2760	Presence	Absence
86	Unclassified_Balneolaceae_48_ASV2799	Unclassified_Balneolaceae_48_ASV2799	Presence	Absence
87	Unclassified_Balneolaceae_3_ASV2779	Unclassified_Balneolaceae_3_ASV2779	Presence	Absence
88	Unclassified_Balneolaceae_40_ASV2791	Unclassified_Balneolaceae_40_ASV2791	Presence	Absence
89	Unclassified_Balneolaceae_70_ASV2824	Unclassified_Balneolaceae_70_ASV2824	Presence	Absence
90	Unclassified_Balneolaceae_8_ASV2834	Unclassified_Balneolaceae_8_ASV2834	Presence	Absence
91	Unclassified_Balneolaceae_2_ASV2768	Unclassified_Balneolaceae_2_ASV2768	Presence	Absence
92	Unclassified_Balneolaceae_60_ASV2813	Unclassified_Balneolaceae_60_ASV2813	Presence	Absence
93	Unclassified_Balneolaceae_47_ASV2798	Unclassified_Balneolaceae_47_ASV2798	Presence	Absence
94	Unclassified_Balneolaceae_59_ASV2811	Unclassified_Balneolaceae_59_ASV2811	Presence	Absence
95	Unclassified_Balneolaceae_45_ASV2796	Unclassified_Balneolaceae_45_ASV2796	Presence	Absence
96	Unclassified_Balneolaceae_24_ASV2773	Unclassified_Balneolaceae_24_ASV2773	Presence	Absence
97	Unclassified_Balneolaceae_32_ASV2782	Unclassified_Balneolaceae_32_ASV2782	Presence	Absence
98	Unclassified_Balneolaceae_31_ASV2781	Unclassified_Balneolaceae_31_ASV2781	Presence	Absence
99	Unclassified_Balneolaceae_46_ASV2797	Unclassified_Balneolaceae_46_ASV2797	Presence	Absence
100	Unclassified_Balneolaceae_65_ASV2818	Unclassified_Balneolaceae_65_ASV2818	Presence	Absence
101	Unclassified_Balneolaceae_81_ASV2836	Unclassified_Balneolaceae_81_ASV2836	Presence	Absence
102	Unclassified_Balneolaceae_54_ASV2806	Unclassified_Balneolaceae_54_ASV2806	Presence	Absence
103	Unclassified_Balneolaceae_37_ASV2787	Unclassified_Balneolaceae_37_ASV2787	Presence	Absence
104	Unclassified_Balneolaceae_25_ASV2774	Unclassified_Balneolaceae_25_ASV2774	Presence	Absence
105	Unclassified_vadinHA49_13_ASV4871	Unclassified_vadinHA49_13_ASV4871	Presence	Absence
106	Unclassified_vadinHA49_16_ASV4874	Unclassified_vadinHA49_16_ASV4874	Presence	Absence
107	Unclassified_vadinHA49_9_ASV4886	Unclassified_vadinHA49_9_ASV4886	Presence	Absence
108	Unclassified_vadinHA49_17_ASV4875	Unclassified_vadinHA49_17_ASV4875	Presence	Absence
109	Unclassified_vadinHA49_11_ASV4869	Unclassified_vadinHA49_11_ASV4869	Presence	Absence
110	Unclassified_vadinHA49_1_ASV4867	Unclassified_vadinHA49_1_ASV4867	Presence	Absence
111	Unclassified_vadinHA49_15_ASV4873	Unclassified_vadinHA49_15_ASV4873	Presence	Absence
112	Unclassified_SM1A07_1_ASV4729	Unclassified_SM1A07_1_ASV4729	Presence	Absence
113	Unclassified_SM1A07_4_ASV4732	Unclassified_SM1A07_4_ASV4732	Presence	Absence
114	Unclassified_SM1A07_2_ASV4730	Unclassified_SM1A07_2_ASV4730	Presence	Absence
115	Unclassified_SM1A07_3_ASV4731	Unclassified_SM1A07_3_ASV4731	Presence	Absence
116	Unclassified_Chitinophagales_7_ASV3040	Unclassified_Chitinophagales_7_ASV3040	Presence	Absence
117	Leadbetterella_ASV1205	Leadbetterella_ASV1205	Presence	Absence
118	Leadbetterella_ASV1204	Leadbetterella_ASV1204	Presence	Absence
119	Leadbetterella_ASV1206	Leadbetterella_ASV1206	Presence	Absence
120	Unclassified_Cryomorphaceae_2_ASV3146	Unclassified_Cryomorphaceae_2_ASV3146	Presence	Absence
121	Cryomorpha_ASV687	Cryomorpha_ASV687	Presence	Absence
122	Cryomorpha_ASV689	Cryomorpha_ASV689	Presence	Absence
123	Cryomorpha_ASV688	Cryomorpha_ASV688	Presence	Absence
124	Cryomorpha_ASV686	Cryomorpha_ASV686	Presence	Absence
125	Pedobacter_ASV1612	Pedobacter_ASV1612	Presence	Absence
126	Sphingobacterium_ASV2115	Sphingobacterium_ASV2115	Presence	Absence
127	Sphingobacterium_ASV2113	Sphingobacterium_ASV2113	Presence	Absence
128	Unclassified_Sphingobacteriaceae_3_ASV4744	Unclassified_Sphingobacteriaceae_3_ASV4744	Presence	Absence
129	Unclassified_Lentimicrobiaceae_6_ASV3763	Unclassified_Lentimicrobiaceae_6_ASV3763	Presence	Absence
130	Unclassified_Bacteroidales_12_ASV2712	Unclassified_Bacteroidales_12_ASV2712	Presence	Absence
131	Unclassified_SB-5_4_ASV4619	Unclassified_SB-5_4_ASV4619	Presence	Absence
132	Unclassified_Bacteroidales_11_ASV2711	Unclassified_Bacteroidales_11_ASV2711	Presence	Absence
133	Unclassified_Bacteroidales_5_ASV2719	Unclassified_Bacteroidales_5_ASV2719	Presence	Absence
134	Paludibacter_ASV1582	Paludibacter_ASV1582	Presence	Absence
135	Unclassified_Chitinophagales_4_ASV3037	Unclassified_Chitinophagales_4_ASV3037	Presence	Absence
136	Unclassified_Chitinophagales_10_ASV3034	Unclassified_Chitinophagales_10_ASV3034	Presence	Absence
137	Unclassified_E6aC02_ASV855	Unclassified_E6aC02_ASV855	Presence	Absence
138	Unclassified_NS9_marine_group_2_ASV3988	Unclassified_NS9_marine_group_2_ASV3988	Presence	Absence
139	Unclassified_Marinilabiliaceae_12_ASV3795	Unclassified_Marinilabiliaceae_12_ASV3795	Presence	Absence
140	Unclassified_Marinilabiliaceae_10_ASV3793	Unclassified_Marinilabiliaceae_10_ASV3793	Presence	Absence
141	Unclassified_Marinilabiliaceae_9_ASV3807	Unclassified_Marinilabiliaceae_9_ASV3807	Presence	Absence
142	Unclassified_Marinilabiliaceae_13_ASV3796	Unclassified_Marinilabiliaceae_13_ASV3796	Presence	Absence
143	Unclassified_Marinilabiliaceae_7_ASV3805	Unclassified_Marinilabiliaceae_7_ASV3805	Presence	Absence
144	Unclassified_Bacteroidetes_BD2-2_17_ASV2732	Unclassified_Bacteroidetes_BD2-2_17_ASV2732	Presence	Absence
145	Unclassified_AKYH767_3_ASV2535	Unclassified_AKYH767_3_ASV2535	Presence	Absence
146	Unclassified_ML635J-40_aquatic_group_ASV1401	Unclassified_ML635J-40_aquatic_group_ASV1401	Presence	Absence
147	Unclassified_ST-12K33_1_ASV4793	Unclassified_ST-12K33_1_ASV4793	Presence	Absence
148	Unclassified_Lentimicrobiaceae_7_ASV3764	Unclassified_Lentimicrobiaceae_7_ASV3764	Presence	Absence
149	Unclassified_Lentimicrobiaceae_16_ASV3758	Unclassified_Lentimicrobiaceae_16_ASV3758	Presence	Absence
150	Unclassified_Lentimicrobiaceae_8_ASV3765	Unclassified_Lentimicrobiaceae_8_ASV3765	Presence	Absence
151	Unclassified_Lentimicrobiaceae_15_ASV3757	Unclassified_Lentimicrobiaceae_15_ASV3757	Presence	Absence
152	Unclassified_Lentimicrobiaceae_9_ASV3766	Unclassified_Lentimicrobiaceae_9_ASV3766	Presence	Absence
153	Unclassified_Lentimicrobiaceae_2_ASV3759	Unclassified_Lentimicrobiaceae_2_ASV3759	Presence	Absence
154	Unclassified_Lentimicrobiaceae_1_ASV3751	Unclassified_Lentimicrobiaceae_1_ASV3751	Presence	Absence
155	Unclassified_Lentimicrobiaceae_12_ASV3754	Unclassified_Lentimicrobiaceae_12_ASV3754	Presence	Absence
156	Lentimicrobium_ASV1233	Lentimicrobium_ASV1233	Presence	Absence
157	Unclassified_Bacteroidales_9_ASV2723	Unclassified_Bacteroidales_9_ASV2723	Presence	Absence
158	Unclassified_AKYH767_2_ASV2534	Unclassified_AKYH767_2_ASV2534	Presence	Absence
159	Unclassified_env.OPS_17_ASV874	Unclassified_env.OPS_17_ASV874	Presence	Absence
160	Unclassified_Lentimicrobiaceae_13_ASV3755	Unclassified_Lentimicrobiaceae_13_ASV3755	Presence	Absence
161	Unclassified_Lentimicrobiaceae_10_ASV3752	Unclassified_Lentimicrobiaceae_10_ASV3752	Presence	Absence
162	Unclassified_Lentimicrobiaceae_11_ASV3753	Unclassified_Lentimicrobiaceae_11_ASV3753	Presence	Absence
163	Unclassified_Bacteroidia_2_ASV2752	Unclassified_Bacteroidia_2_ASV2752	Presence	Absence
164	Vicingus_ASV5066	Vicingus_ASV5066	Presence	Absence
165	Vicingus_ASV5064	Vicingus_ASV5064	Presence	Absence
166	Vicingus_ASV5065	Vicingus_ASV5065	Presence	Absence
167	Vicingus_ASV5067	Vicingus_ASV5067	Presence	Absence
168	Unclassified_Sphingobacteriaceae_1_ASV4742	Unclassified_Sphingobacteriaceae_1_ASV4742	Presence	Absence
169	Unclassified_Chitinophagales_5_ASV3038	Unclassified_Chitinophagales_5_ASV3038	Presence	Absence
170	Taibaiella_ASV2322	Taibaiella_ASV2322	Presence	Absence
171	Taibaiella_ASV2324	Taibaiella_ASV2324	Presence	Absence
172	Taibaiella_ASV2321	Taibaiella_ASV2321	Presence	Absence
173	Taibaiella_ASV2319	Taibaiella_ASV2319	Presence	Absence
174	Taibaiella_ASV2325	Taibaiella_ASV2325	Presence	Absence
175	Unclassified_Saprospiraceae_26_ASV4544	Unclassified_Saprospiraceae_26_ASV4544	Presence	Absence
176	Unclassified_Saprospiraceae_28_ASV4546	Unclassified_Saprospiraceae_28_ASV4546	Presence	Absence
177	Unclassified_Saprospiraceae_17_ASV4534	Unclassified_Saprospiraceae_17_ASV4534	Presence	Absence
178	Unclassified_Saprospiraceae_6_ASV4579	Unclassified_Saprospiraceae_6_ASV4579	Presence	Absence
179	Unclassified_Saprospiraceae_20_ASV4538	Unclassified_Saprospiraceae_20_ASV4538	Presence	Absence
180	Unclassified_Saprospiraceae_23_ASV4541	Unclassified_Saprospiraceae_23_ASV4541	Presence	Absence
181	Unclassified_Saprospiraceae_22_ASV4540	Unclassified_Saprospiraceae_22_ASV4540	Presence	Absence
182	Unclassified_Saprospiraceae_19_ASV4536	Unclassified_Saprospiraceae_19_ASV4536	Presence	Absence
183	Unclassified_Saprospiraceae_56_ASV4577	Unclassified_Saprospiraceae_56_ASV4577	Presence	Absence
184	Unclassified_Saprospiraceae_16_ASV4533	Unclassified_Saprospiraceae_16_ASV4533	Presence	Absence
185	Unclassified_Saprospiraceae_45_ASV4565	Unclassified_Saprospiraceae_45_ASV4565	Presence	Absence
186	Unclassified_Saprospiraceae_21_ASV4539	Unclassified_Saprospiraceae_21_ASV4539	Presence	Absence
187	Lewinella_ASV1259	Lewinella_ASV1259	Presence	Absence
188	Unclassified_Saprospiraceae_25_ASV4543	Unclassified_Saprospiraceae_25_ASV4543	Presence	Absence
189	Lewinella_ASV1261	Lewinella_ASV1261	Presence	Absence
190	Phaeodactylibacter_ASV1637	Phaeodactylibacter_ASV1637	Presence	Absence
191	Phaeodactylibacter_ASV1647	Phaeodactylibacter_ASV1647	Presence	Absence
192	Phaeodactylibacter_ASV1635	Phaeodactylibacter_ASV1635	Presence	Absence
193	Phaeodactylibacter_ASV1638	Phaeodactylibacter_ASV1638	Presence	Absence
194	Phaeodactylibacter_ASV1646	Phaeodactylibacter_ASV1646	Presence	Absence
195	Unclassified_Saprospiraceae_8_ASV4581	Unclassified_Saprospiraceae_8_ASV4581	Presence	Absence
196	Lewinella_ASV1262	Lewinella_ASV1262	Presence	Absence
197	Phaeodactylibacter_ASV1648	Phaeodactylibacter_ASV1648	Presence	Absence
198	Phaeodactylibacter_ASV1641	Phaeodactylibacter_ASV1641	Presence	Absence
199	Phaeodactylibacter_ASV1639	Phaeodactylibacter_ASV1639	Presence	Absence
200	Unclassified_Saprospiraceae_3_ASV4548	Unclassified_Saprospiraceae_3_ASV4548	Presence	Absence
201	Lewinella_ASV1260	Lewinella_ASV1260	Presence	Absence
202	Unclassified_Saprospiraceae_42_ASV4562	Unclassified_Saprospiraceae_42_ASV4562	Presence	Absence
203	Unclassified_Saprospiraceae_47_ASV4567	Unclassified_Saprospiraceae_47_ASV4567	Presence	Absence
204	Unclassified_Saprospiraceae_43_ASV4563	Unclassified_Saprospiraceae_43_ASV4563	Presence	Absence
205	Unclassified_Saprospiraceae_51_ASV4572	Unclassified_Saprospiraceae_51_ASV4572	Presence	Absence
206	Phaeodactylibacter_ASV1644	Phaeodactylibacter_ASV1644	Presence	Absence
207	Unclassified_Saprospiraceae_10_ASV4527	Unclassified_Saprospiraceae_10_ASV4527	Presence	Absence
208	Unclassified_Saprospiraceae_31_ASV4550	Unclassified_Saprospiraceae_31_ASV4550	Presence	Absence
209	Unclassified_Saprospiraceae_32_ASV4551	Unclassified_Saprospiraceae_32_ASV4551	Presence	Absence
210	Unclassified_Saprospiraceae_44_ASV4564	Unclassified_Saprospiraceae_44_ASV4564	Presence	Absence
211	Unclassified_Saprospiraceae_1_ASV4526	Unclassified_Saprospiraceae_1_ASV4526	Presence	Absence
212	Unclassified_Saprospiraceae_40_ASV4560	Unclassified_Saprospiraceae_40_ASV4560	Presence	Absence
213	Unclassified_Saprospiraceae_38_ASV4557	Unclassified_Saprospiraceae_38_ASV4557	Presence	Absence
214	Unclassified_Saprospiraceae_55_ASV4576	Unclassified_Saprospiraceae_55_ASV4576	Presence	Absence
215	Unclassified_Saprospiraceae_37_ASV4556	Unclassified_Saprospiraceae_37_ASV4556	Presence	Absence
216	Unclassified_Saprospiraceae_4_ASV4559	Unclassified_Saprospiraceae_4_ASV4559	Presence	Absence
217	Unclassified_Saprospiraceae_35_ASV4554	Unclassified_Saprospiraceae_35_ASV4554	Presence	Absence
218	Unclassified_Saprospiraceae_48_ASV4568	Unclassified_Saprospiraceae_48_ASV4568	Presence	Absence
219	Unclassified_Saprospiraceae_39_ASV4558	Unclassified_Saprospiraceae_39_ASV4558	Presence	Absence
220	Membranicola_ASV1347	Membranicola_ASV1347	Presence	Absence
221	Membranicola_ASV1349	Membranicola_ASV1349	Presence	Absence
222	Membranicola_ASV1348	Membranicola_ASV1348	Presence	Absence
223	Membranicola_ASV1346	Membranicola_ASV1346	Presence	Absence
224	Unclassified_Saprospiraceae_41_ASV4561	Unclassified_Saprospiraceae_41_ASV4561	Presence	Absence
225	Unclassified_Saprospiraceae_5_ASV4570	Unclassified_Saprospiraceae_5_ASV4570	Presence	Absence
226	Unclassified_Saprospiraceae_54_ASV4575	Unclassified_Saprospiraceae_54_ASV4575	Presence	Absence
227	Unclassified_Saprospiraceae_36_ASV4555	Unclassified_Saprospiraceae_36_ASV4555	Presence	Absence
228	OLB8_ASV1544	OLB8_ASV1544	Presence	Absence
229	Unclassified_Chitinophagaceae_8_ASV3031	Unclassified_Chitinophagaceae_8_ASV3031	Presence	Absence
230	Unclassified_Chitinophagaceae_19_ASV3020	Unclassified_Chitinophagaceae_19_ASV3020	Presence	Absence
231	Lacibacter_ASV1171	Lacibacter_ASV1171	Presence	Absence
232	Unclassified_Chitinophagaceae_9_ASV3032	Unclassified_Chitinophagaceae_9_ASV3032	Presence	Absence
233	Terrimonas_ASV2341	Terrimonas_ASV2341	Presence	Absence
234	Chitinophaga_ASV508	Chitinophaga_ASV508	Presence	Absence
235	Unclassified_Chitinophagaceae_10_ASV3011	Unclassified_Chitinophagaceae_10_ASV3011	Presence	Absence
236	Dinghuibacter_ASV843	Dinghuibacter_ASV843	Presence	Absence
237	Flavisolibacter_ASV935	Flavisolibacter_ASV935	Presence	Absence
238	Unclassified_Chitinophagaceae_16_ASV3017	Unclassified_Chitinophagaceae_16_ASV3017	Presence	Absence
239	Unclassified_Chitinophagaceae_23_ASV3025	Unclassified_Chitinophagaceae_23_ASV3025	Presence	Absence
240	Unclassified_Chitinophagaceae_13_ASV3014	Unclassified_Chitinophagaceae_13_ASV3014	Presence	Absence
241	Unclassified_Chitinophagaceae_15_ASV3016	Unclassified_Chitinophagaceae_15_ASV3016	Presence	Absence
242	Unclassified_Chitinophagaceae_14_ASV3015	Unclassified_Chitinophagaceae_14_ASV3015	Presence	Absence
243	Unclassified_Crocinitomicaceae_4_ASV3144	Unclassified_Crocinitomicaceae_4_ASV3144	Presence	Absence
244	Unclassified_Crocinitomicaceae_3_ASV3143	Unclassified_Crocinitomicaceae_3_ASV3143	Presence	Absence
245	Unclassified_Crocinitomicaceae_2_ASV3142	Unclassified_Crocinitomicaceae_2_ASV3142	Presence	Absence
246	Unclassified_Crocinitomicaceae_1_ASV3141	Unclassified_Crocinitomicaceae_1_ASV3141	Presence	Absence
247	Unclassified_NS11-12_marine_group_1_ASV3985	Unclassified_NS11-12_marine_group_1_ASV3985	Presence	Absence
248	Unclassified_Chitinophagales_9_ASV3042	Unclassified_Chitinophagales_9_ASV3042	Presence	Absence
249	Unclassified_Bacteroidia_4_ASV2754	Unclassified_Bacteroidia_4_ASV2754	Presence	Absence
250	Unclassified_Chitinophagales_6_ASV3039	Unclassified_Chitinophagales_6_ASV3039	Presence	Absence
251	Unclassified_Bacteroidia_3_ASV2753	Unclassified_Bacteroidia_3_ASV2753	Presence	Absence
252	Unclassified_Chitinophagales_3_ASV3036	Unclassified_Chitinophagales_3_ASV3036	Presence	Absence
253	Unclassified_SB-5_17_ASV4612	Unclassified_SB-5_17_ASV4612	Presence	Absence
254	Unclassified_SB-5_7_ASV4622	Unclassified_SB-5_7_ASV4622	Presence	Absence
255	Unclassified_SB-5_1_ASV4604	Unclassified_SB-5_1_ASV4604	Presence	Absence
256	Unclassified_Bacteroidetes_BD2-2_5_ASV2744	Unclassified_Bacteroidetes_BD2-2_5_ASV2744	Presence	Absence
257	Unclassified_SB-5_19_ASV4614	Unclassified_SB-5_19_ASV4614	Presence	Absence
258	Unclassified_Bacteroidales_8_ASV2722	Unclassified_Bacteroidales_8_ASV2722	Presence	Absence
259	Unclassified_Bacteroidetes_BD2-2_12_ASV2727	Unclassified_Bacteroidetes_BD2-2_12_ASV2727	Presence	Absence
260	Unclassified_Bacteroidales_14_ASV2714	Unclassified_Bacteroidales_14_ASV2714	Presence	Absence
261	Unclassified_Bacteroidetes_BD2-2_21_ASV2737	Unclassified_Bacteroidetes_BD2-2_21_ASV2737	Presence	Absence
262	Unclassified_Marinilabiliaceae_11_ASV3794	Unclassified_Marinilabiliaceae_11_ASV3794	Presence	Absence
263	Unclassified_Marinilabiliaceae_16_ASV3799	Unclassified_Marinilabiliaceae_16_ASV3799	Presence	Absence
264	Unclassified_Marinilabiliaceae_5_ASV3803	Unclassified_Marinilabiliaceae_5_ASV3803	Presence	Absence
265	Unclassified_Marinilabiliaceae_8_ASV3806	Unclassified_Marinilabiliaceae_8_ASV3806	Presence	Absence
266	Unclassified_Bacteroidetes_vadinHA17_1_ASV2749	Unclassified_Bacteroidetes_vadinHA17_1_ASV2749	Presence	Absence
267	Unclassified_Bacteroidales_7_ASV2721	Unclassified_Bacteroidales_7_ASV2721	Presence	Absence
268	Unclassified_Bacteroidales_10_ASV2710	Unclassified_Bacteroidales_10_ASV2710	Presence	Absence
269	Unclassified_SB-5_8_ASV4623	Unclassified_SB-5_8_ASV4623	Presence	Absence
270	Unclassified_SB-5_15_ASV4610	Unclassified_SB-5_15_ASV4610	Presence	Absence
271	Unclassified_SB-5_18_ASV4613	Unclassified_SB-5_18_ASV4613	Presence	Absence
272	Unclassified_SB-5_5_ASV4620	Unclassified_SB-5_5_ASV4620	Presence	Absence
273	Unclassified_SB-5_6_ASV4621	Unclassified_SB-5_6_ASV4621	Presence	Absence
274	Unclassified_SB-5_21_ASV4617	Unclassified_SB-5_21_ASV4617	Presence	Absence
275	Unclassified_SB-5_14_ASV4609	Unclassified_SB-5_14_ASV4609	Presence	Absence
276	Unclassified_SB-5_9_ASV4624	Unclassified_SB-5_9_ASV4624	Presence	Absence
277	Unclassified_SB-5_16_ASV4611	Unclassified_SB-5_16_ASV4611	Presence	Absence
278	Unclassified_SB-5_10_ASV4605	Unclassified_SB-5_10_ASV4605	Presence	Absence
279	Unclassified_Bacteroidales_3_ASV2717	Unclassified_Bacteroidales_3_ASV2717	Presence	Absence
280	Unclassified_Bacteroidetes_BD2-2_6_ASV2745	Unclassified_Bacteroidetes_BD2-2_6_ASV2745	Presence	Absence
281	Unclassified_Bacteroidetes_BD2-2_23_ASV2739	Unclassified_Bacteroidetes_BD2-2_23_ASV2739	Presence	Absence
282	Unclassified_Bacteroidetes_BD2-2_20_ASV2736	Unclassified_Bacteroidetes_BD2-2_20_ASV2736	Presence	Absence
283	Unclassified_Bacteroidetes_BD2-2_9_ASV2748	Unclassified_Bacteroidetes_BD2-2_9_ASV2748	Presence	Absence
284	Unclassified_Bacteroidetes_BD2-2_25_ASV2741	Unclassified_Bacteroidetes_BD2-2_25_ASV2741	Presence	Absence
285	Roseimarinus_ASV1904	Roseimarinus_ASV1904	Presence	Absence
286	Unclassified_Marinilabiliaceae_3_ASV3801	Unclassified_Marinilabiliaceae_3_ASV3801	Presence	Absence
287	Unclassified_Marinilabiliaceae_6_ASV3804	Unclassified_Marinilabiliaceae_6_ASV3804	Presence	Absence
288	Unclassified_Marinilabiliaceae_15_ASV3798	Unclassified_Marinilabiliaceae_15_ASV3798	Presence	Absence
289	Unclassified_SB-5_12_ASV4607	Unclassified_SB-5_12_ASV4607	Presence	Absence
290	Unclassified_SB-5_13_ASV4608	Unclassified_SB-5_13_ASV4608	Presence	Absence
291	Unclassified_SB-5_20_ASV4616	Unclassified_SB-5_20_ASV4616	Presence	Absence
292	Tangfeifania_ASV2326	Tangfeifania_ASV2326	Presence	Absence
293	Unclassified_Prolixibacteraceae_9_ASV4242	Unclassified_Prolixibacteraceae_9_ASV4242	Presence	Absence
294	Unclassified_Prolixibacteraceae_1_ASV4233	Unclassified_Prolixibacteraceae_1_ASV4233	Presence	Absence
295	Unclassified_Prolixibacteraceae_7_ASV4240	Unclassified_Prolixibacteraceae_7_ASV4240	Presence	Absence
296	Unclassified_Prolixibacteraceae_8_ASV4241	Unclassified_Prolixibacteraceae_8_ASV4241	Presence	Absence
297	Unclassified_Prolixibacteraceae_6_ASV4239	Unclassified_Prolixibacteraceae_6_ASV4239	Presence	Absence
298	Unclassified_Prolixibacteraceae_5_ASV4238	Unclassified_Prolixibacteraceae_5_ASV4238	Presence	Absence
299	Draconibacterium_ASV851	Draconibacterium_ASV851	Presence	Absence
300	Draconibacterium_ASV850	Draconibacterium_ASV850	Presence	Absence
301	Unclassified_Bacteroidales_4_ASV2718	Unclassified_Bacteroidales_4_ASV2718	Presence	Absence
302	Unclassified_Lentimicrobiaceae_5_ASV3762	Unclassified_Lentimicrobiaceae_5_ASV3762	Presence	Absence
303	Unclassified_Bacteroidetes_BD2-2_1_ASV2724	Unclassified_Bacteroidetes_BD2-2_1_ASV2724	Presence	Absence
304	Unclassified_SB-5_2_ASV4615	Unclassified_SB-5_2_ASV4615	Presence	Absence
305	Unclassified_Bacteroidales_13_ASV2713	Unclassified_Bacteroidales_13_ASV2713	Presence	Absence
306	Unclassified_Bacteroidetes_BD2-2_18_ASV2733	Unclassified_Bacteroidetes_BD2-2_18_ASV2733	Presence	Absence
307	Unclassified_Bacteroidetes_BD2-2_19_ASV2734	Unclassified_Bacteroidetes_BD2-2_19_ASV2734	Presence	Absence
308	Unclassified_Bacteroidetes_BD2-2_4_ASV2743	Unclassified_Bacteroidetes_BD2-2_4_ASV2743	Presence	Absence
309	Robiginitalea_ASV1890	Robiginitalea_ASV1890	Presence	Absence
310	Muricauda_ASV1415	Muricauda_ASV1415	Presence	Absence
311	Unclassified_Flavobacteriaceae_40_ASV3426	Unclassified_Flavobacteriaceae_40_ASV3426	Presence	Absence
312	Unclassified_Flavobacteriaceae_53_ASV3440	Unclassified_Flavobacteriaceae_53_ASV3440	Presence	Absence
313	Chryseobacterium_ASV549	Chryseobacterium_ASV549	Presence	Absence
314	Unclassified_Flavobacteriaceae_11_ASV3394	Unclassified_Flavobacteriaceae_11_ASV3394	Presence	Absence
315	Unclassified_Flavobacteriaceae_43_ASV3429	Unclassified_Flavobacteriaceae_43_ASV3429	Presence	Absence
316	Unclassified_Flavobacteriaceae_55_ASV3442	Unclassified_Flavobacteriaceae_55_ASV3442	Presence	Absence
317	Unclassified_Flavobacteriaceae_1_ASV3392	Unclassified_Flavobacteriaceae_1_ASV3392	Presence	Absence
318	Unclassified_Weeksellaceae_8_ASV4941	Unclassified_Weeksellaceae_8_ASV4941	Presence	Absence
319	Unclassified_Flavobacteriaceae_51_ASV3438	Unclassified_Flavobacteriaceae_51_ASV3438	Presence	Absence
320	Psychroflexus_ASV1790	Psychroflexus_ASV1790	Presence	Absence
321	Psychroflexus_ASV1789	Psychroflexus_ASV1789	Presence	Absence
322	Maribacter_ASV1302	Maribacter_ASV1302	Presence	Absence
323	Unclassified_Flavobacteriaceae_34_ASV3419	Unclassified_Flavobacteriaceae_34_ASV3419	Presence	Absence
324	Unclassified_Flavobacteriaceae_8_ASV3449	Unclassified_Flavobacteriaceae_8_ASV3449	Presence	Absence
325	Unclassified_Flavobacteriaceae_45_ASV3431	Unclassified_Flavobacteriaceae_45_ASV3431	Presence	Absence
326	Unclassified_Flavobacteriaceae_12_ASV3395	Unclassified_Flavobacteriaceae_12_ASV3395	Presence	Absence
327	Unclassified_Flavobacteriaceae_30_ASV3415	Unclassified_Flavobacteriaceae_30_ASV3415	Presence	Absence
328	Psychroflexus_ASV1793	Psychroflexus_ASV1793	Presence	Absence
329	NS5_marine_group_ASV1522	NS5_marine_group_ASV1522	Presence	Absence
330	NS5_marine_group_ASV1518	NS5_marine_group_ASV1518	Presence	Absence
331	NS5_marine_group_ASV1519	NS5_marine_group_ASV1519	Presence	Absence
332	NS5_marine_group_ASV1525	NS5_marine_group_ASV1525	Presence	Absence
333	Unclassified_Flavobacteriaceae_22_ASV3406	Unclassified_Flavobacteriaceae_22_ASV3406	Presence	Absence
334	Unclassified_Flavobacteriaceae_2_ASV3403	Unclassified_Flavobacteriaceae_2_ASV3403	Presence	Absence
335	Unclassified_Flavobacteriaceae_28_ASV3412	Unclassified_Flavobacteriaceae_28_ASV3412	Presence	Absence
336	Unclassified_Flavobacteriaceae_13_ASV3396	Unclassified_Flavobacteriaceae_13_ASV3396	Presence	Absence
337	Unclassified_Flavobacteriaceae_49_ASV3435	Unclassified_Flavobacteriaceae_49_ASV3435	Presence	Absence
338	Unclassified_Weeksellaceae_12_ASV4933	Unclassified_Weeksellaceae_12_ASV4933	Presence	Absence
339	Unclassified_Weeksellaceae_7_ASV4940	Unclassified_Weeksellaceae_7_ASV4940	Presence	Absence
340	Chryseobacterium_ASV548	Chryseobacterium_ASV548	Presence	Absence
341	Empedobacter_ASV861	Empedobacter_ASV861	Presence	Absence
342	Moheibacter_ASV1406	Moheibacter_ASV1406	Presence	Absence
343	Planktosalinus_ASV1700	Planktosalinus_ASV1700	Presence	Absence
344	Unclassified_Flavobacteriaceae_58_ASV3445	Unclassified_Flavobacteriaceae_58_ASV3445	Presence	Absence
345	Unclassified_Flavobacteriaceae_18_ASV3401	Unclassified_Flavobacteriaceae_18_ASV3401	Presence	Absence
346	Unclassified_Flavobacteriaceae_15_ASV3398	Unclassified_Flavobacteriaceae_15_ASV3398	Presence	Absence
347	Unclassified_Flavobacteriaceae_35_ASV3420	Unclassified_Flavobacteriaceae_35_ASV3420	Presence	Absence
348	Unclassified_Flavobacteriaceae_14_ASV3397	Unclassified_Flavobacteriaceae_14_ASV3397	Presence	Absence
349	Unclassified_Flavobacteriaceae_44_ASV3430	Unclassified_Flavobacteriaceae_44_ASV3430	Presence	Absence
350	Mesonia_ASV1350	Mesonia_ASV1350	Presence	Absence
351	Salegentibacter_ASV1966	Salegentibacter_ASV1966	Presence	Absence
352	Psychroflexus_ASV1788	Psychroflexus_ASV1788	Presence	Absence
353	Mangroviflexus_ASV1300	Mangroviflexus_ASV1300	Presence	Absence
354	Porphyromonas_ASV1710	Porphyromonas_ASV1710	Presence	Absence
355	Prevotellaceae_UCG-001_ASV1721	Prevotellaceae_UCG-001_ASV1721	Presence	Absence
356	Prevotella_ASV1711	Prevotella_ASV1711	Presence	Absence
357	Unclassified_Prevotellaceae_1_ASV4232	Unclassified_Prevotellaceae_1_ASV4232	Presence	Absence
358	Prevotella_ASV1712	Prevotella_ASV1712	Presence	Absence
359	Prevotella_9_ASV1718	Prevotella_9_ASV1718	Presence	Absence
360	Prevotella_7_ASV1715	Prevotella_7_ASV1715	Presence	Absence
361	Prevotella_9_ASV1719	Prevotella_9_ASV1719	Presence	Absence
362	Prevotellaceae_UCG-001_ASV1720	Prevotellaceae_UCG-001_ASV1720	Presence	Absence
363	Proteiniphilum_ASV1731	Proteiniphilum_ASV1731	Presence	Absence
364	Bacteroides_ASV269	Bacteroides_ASV269	Presence	Absence
365	Bacteroides_ASV272	Bacteroides_ASV272	Presence	Absence
366	Bacteroides_ASV275	Bacteroides_ASV275	Presence	Absence
367	Unclassified_Cytophagales_6_ASV3211	Unclassified_Cytophagales_6_ASV3211	Presence	Absence
368	Unclassified_Cyclobacteriaceae_5_ASV3199	Unclassified_Cyclobacteriaceae_5_ASV3199	Presence	Absence
369	Unclassified_Cyclobacteriaceae_9_ASV3203	Unclassified_Cyclobacteriaceae_9_ASV3203	Presence	Absence
370	Unclassified_Cytophagales_5_ASV3210	Unclassified_Cytophagales_5_ASV3210	Presence	Absence
371	Hymenobacter_ASV1105	Hymenobacter_ASV1105	Presence	Absence
372	Hymenobacter_ASV1104	Hymenobacter_ASV1104	Presence	Absence
373	Hymenobacter_ASV1101	Hymenobacter_ASV1101	Presence	Absence
374	Hymenobacter_ASV1103	Hymenobacter_ASV1103	Presence	Absence
375	Hymenobacter_ASV1107	Hymenobacter_ASV1107	Presence	Absence
376	Adhaeribacter_ASV89	Adhaeribacter_ASV89	Presence	Absence
377	Algoriphagus_ASV125	Algoriphagus_ASV125	Presence	Absence
378	Unclassified_Microscillaceae_1_ASV3871	Unclassified_Microscillaceae_1_ASV3871	Presence	Absence
379	Unclassified_Spirosomaceae_3_ASV4780	Unclassified_Spirosomaceae_3_ASV4780	Presence	Absence
380	Larkinella_ASV1186	Larkinella_ASV1186	Presence	Absence
381	Larkinella_ASV1185	Larkinella_ASV1185	Presence	Absence
382	Spirosoma_ASV2213	Spirosoma_ASV2213	Presence	Absence
383	OLB12_ASV1542	OLB12_ASV1542	Presence	Absence
384	Unclassified_Cyclobacteriaceae_22_ASV3186	Unclassified_Cyclobacteriaceae_22_ASV3186	Presence	Absence
385	Unclassified_Cyclobacteriaceae_21_ASV3185	Unclassified_Cyclobacteriaceae_21_ASV3185	Presence	Absence
386	Unclassified_Cyclobacteriaceae_32_ASV3197	Unclassified_Cyclobacteriaceae_32_ASV3197	Presence	Absence
387	Unclassified_Cyclobacteriaceae_14_ASV3177	Unclassified_Cyclobacteriaceae_14_ASV3177	Presence	Absence
388	Unclassified_Cyclobacteriaceae_27_ASV3191	Unclassified_Cyclobacteriaceae_27_ASV3191	Presence	Absence
389	Unclassified_Cyclobacteriaceae_7_ASV3201	Unclassified_Cyclobacteriaceae_7_ASV3201	Presence	Absence
390	Marinoscillum_ASV1323	Marinoscillum_ASV1323	Presence	Absence
391	Unclassified_Cytophagales_11_ASV3206	Unclassified_Cytophagales_11_ASV3206	Presence	Absence
392	Marinoscillum_ASV1322	Marinoscillum_ASV1322	Presence	Absence
393	Marinoscillum_ASV1326	Marinoscillum_ASV1326	Presence	Absence
394	Marinoscillum_ASV1325	Marinoscillum_ASV1325	Presence	Absence
395	Unclassified_Cyclobacteriaceae_19_ASV3182	Unclassified_Cyclobacteriaceae_19_ASV3182	Presence	Absence
396	Unclassified_Cyclobacteriaceae_4_ASV3198	Unclassified_Cyclobacteriaceae_4_ASV3198	Presence	Absence
397	Unclassified_Cyclobacteriaceae_10_ASV3173	Unclassified_Cyclobacteriaceae_10_ASV3173	Presence	Absence
398	Unclassified_Cyclobacteriaceae_1_ASV3172	Unclassified_Cyclobacteriaceae_1_ASV3172	Presence	Absence
399	Unclassified_Cyclobacteriaceae_3_ASV3194	Unclassified_Cyclobacteriaceae_3_ASV3194	Presence	Absence
400	Unclassified_Cyclobacteriaceae_26_ASV3190	Unclassified_Cyclobacteriaceae_26_ASV3190	Presence	Absence
401	Unclassified_Cyclobacteriaceae_8_ASV3202	Unclassified_Cyclobacteriaceae_8_ASV3202	Presence	Absence
402	Unclassified_Cytophagales_4_ASV3209	Unclassified_Cytophagales_4_ASV3209	Presence	Absence
403	Unclassified_Cyclobacteriaceae_30_ASV3195	Unclassified_Cyclobacteriaceae_30_ASV3195	Presence	Absence
404	Fulvivirga_ASV969	Fulvivirga_ASV969	Presence	Absence
405	Unclassified_Cyclobacteriaceae_29_ASV3193	Unclassified_Cyclobacteriaceae_29_ASV3193	Presence	Absence
406	Unclassified_Cyclobacteriaceae_16_ASV3179	Unclassified_Cyclobacteriaceae_16_ASV3179	Presence	Absence
407	Unclassified_Cyclobacteriaceae_18_ASV3181	Unclassified_Cyclobacteriaceae_18_ASV3181	Presence	Absence
408	Unclassified_Cyclobacteriaceae_28_ASV3192	Unclassified_Cyclobacteriaceae_28_ASV3192	Presence	Absence
409	Unclassified_Cyclobacteriaceae_20_ASV3184	Unclassified_Cyclobacteriaceae_20_ASV3184	Presence	Absence
410	Unclassified_Cytophagales_7_ASV3212	Unclassified_Cytophagales_7_ASV3212	Presence	Absence
411	Unclassified_Cyclobacteriaceae_25_ASV3189	Unclassified_Cyclobacteriaceae_25_ASV3189	Presence	Absence
412	Unclassified_Cyclobacteriaceae_17_ASV3180	Unclassified_Cyclobacteriaceae_17_ASV3180	Presence	Absence
413	Unclassified_Cyclobacteriaceae_31_ASV3196	Unclassified_Cyclobacteriaceae_31_ASV3196	Presence	Absence
414	Unclassified_Cyclobacteriaceae_6_ASV3200	Unclassified_Cyclobacteriaceae_6_ASV3200	Presence	Absence
415	Unclassified_Cyclobacteriaceae_11_ASV3174	Unclassified_Cyclobacteriaceae_11_ASV3174	Presence	Absence
416	Marinoscillum_ASV1324	Marinoscillum_ASV1324	Presence	Absence
417	Rubrivirga_ASV1944	Rubrivirga_ASV1944	Presence	Absence
418	Unclassified_Rhodothermaceae_18_ASV4468	Unclassified_Rhodothermaceae_18_ASV4468	Presence	Absence
419	Unclassified_Rhodothermaceae_14_ASV4464	Unclassified_Rhodothermaceae_14_ASV4464	Presence	Absence
420	Unclassified_Rhodothermaceae_19_ASV4469	Unclassified_Rhodothermaceae_19_ASV4469	Presence	Absence
421	Unclassified_Rhodothermaceae_20_ASV4471	Unclassified_Rhodothermaceae_20_ASV4471	Presence	Absence
422	Unclassified_Rhodothermaceae_1_ASV4459	Unclassified_Rhodothermaceae_1_ASV4459	Presence	Absence
423	Salinibacter_ASV1980	Salinibacter_ASV1980	Presence	Absence
424	Unclassified_Rhodothermaceae_4_ASV4476	Unclassified_Rhodothermaceae_4_ASV4476	Presence	Absence
425	Salinibacter_ASV1974	Salinibacter_ASV1974	Presence	Absence
426	Salinibacter_ASV1983	Salinibacter_ASV1983	Presence	Absence
427	Salinibacter_ASV1969	Salinibacter_ASV1969	Presence	Absence
428	Unclassified_Rhodothermaceae_15_ASV4465	Unclassified_Rhodothermaceae_15_ASV4465	Presence	Absence
429	Salinibacter_ASV1981	Salinibacter_ASV1981	Presence	Absence
430	Unclassified_Rhodothermaceae_6_ASV4478	Unclassified_Rhodothermaceae_6_ASV4478	Presence	Absence
431	Salinibacter_ASV1977	Salinibacter_ASV1977	Presence	Absence
432	Salinibacter_ASV1973	Salinibacter_ASV1973	Presence	Absence
433	Unclassified_Rhodothermaceae_3_ASV4475	Unclassified_Rhodothermaceae_3_ASV4475	Presence	Absence
434	Salinibacter_ASV1978	Salinibacter_ASV1978	Presence	Absence
435	Salinibacter_ASV1975	Salinibacter_ASV1975	Presence	Absence
436	Salinibacter_ASV1971	Salinibacter_ASV1971	Presence	Absence
437	Unclassified_Rhodothermaceae_2_ASV4470	Unclassified_Rhodothermaceae_2_ASV4470	Presence	Absence
438	Salinibacter_ASV1976	Salinibacter_ASV1976	Presence	Absence
439	Salisaeta_ASV2028	Salisaeta_ASV2028	Presence	Absence
440	Salinibacter_ASV1970	Salinibacter_ASV1970	Presence	Absence
441	Salinibacter_ASV1982	Salinibacter_ASV1982	Presence	Absence
442	Unclassified_Rhodothermaceae_16_ASV4466	Unclassified_Rhodothermaceae_16_ASV4466	Presence	Absence
443	Unclassified_Rhodothermaceae_8_ASV4480	Unclassified_Rhodothermaceae_8_ASV4480	Presence	Absence
444	Unclassified_Rhodothermaceae_23_ASV4474	Unclassified_Rhodothermaceae_23_ASV4474	Presence	Absence
445	Unclassified_Rhodothermaceae_9_ASV4481	Unclassified_Rhodothermaceae_9_ASV4481	Presence	Absence
446	Unclassified_Rhodothermaceae_17_ASV4467	Unclassified_Rhodothermaceae_17_ASV4467	Presence	Absence
447	Unclassified_Rhodothermaceae_21_ASV4472	Unclassified_Rhodothermaceae_21_ASV4472	Presence	Absence
448	Unclassified_Rhodothermaceae_10_ASV4460	Unclassified_Rhodothermaceae_10_ASV4460	Presence	Absence
449	Leptospira_ASV1243	Leptospira_ASV1243	Presence	Absence
450	Unclassified_Sumerlaeia_3_ASV4821	Unclassified_Sumerlaeia_3_ASV4821	Presence	Absence
451	Unclassified_Zixibacteria_12_ASV4976	Unclassified_Zixibacteria_12_ASV4976	Presence	Absence
452	Unclassified_Zixibacteria_2_ASV4984	Unclassified_Zixibacteria_2_ASV4984	Presence	Absence
453	Unclassified_Zixibacteria_28_ASV4993	Unclassified_Zixibacteria_28_ASV4993	Presence	Absence
454	Unclassified_Zixibacteria_4_ASV4996	Unclassified_Zixibacteria_4_ASV4996	Presence	Absence
455	Unclassified_Zixibacteria_21_ASV4986	Unclassified_Zixibacteria_21_ASV4986	Presence	Absence
456	Unclassified_Zixibacteria_9_ASV5001	Unclassified_Zixibacteria_9_ASV5001	Presence	Absence
457	Unclassified_Zixibacteria_15_ASV4979	Unclassified_Zixibacteria_15_ASV4979	Presence	Absence
458	Unclassified_WCHB1-41_4_ASV4916	Unclassified_WCHB1-41_4_ASV4916	Presence	Absence
459	Unclassified_Zixibacteria_27_ASV4992	Unclassified_Zixibacteria_27_ASV4992	Presence	Absence
460	Unclassified_Zixibacteria_14_ASV4978	Unclassified_Zixibacteria_14_ASV4978	Presence	Absence
461	Unclassified_Zixibacteria_1_ASV4973	Unclassified_Zixibacteria_1_ASV4973	Presence	Absence
462	Unclassified_Zixibacteria_19_ASV4983	Unclassified_Zixibacteria_19_ASV4983	Presence	Absence
463	Unclassified_Zixibacteria_26_ASV4991	Unclassified_Zixibacteria_26_ASV4991	Presence	Absence
464	Unclassified_Zixibacteria_24_ASV4989	Unclassified_Zixibacteria_24_ASV4989	Presence	Absence
465	Unclassified_Zixibacteria_25_ASV4990	Unclassified_Zixibacteria_25_ASV4990	Presence	Absence
466	Unclassified_Zixibacteria_18_ASV4982	Unclassified_Zixibacteria_18_ASV4982	Presence	Absence
467	Unclassified_Zixibacteria_10_ASV4974	Unclassified_Zixibacteria_10_ASV4974	Presence	Absence
468	Unclassified_Zixibacteria_22_ASV4987	Unclassified_Zixibacteria_22_ASV4987	Presence	Absence
469	Unclassified_Latescibacterota_2_ASV3736	Unclassified_Latescibacterota_2_ASV3736	Presence	Absence
470	Unclassified_Zixibacteria_5_ASV4997	Unclassified_Zixibacteria_5_ASV4997	Presence	Absence
471	Unclassified_Zixibacteria_16_ASV4980	Unclassified_Zixibacteria_16_ASV4980	Presence	Absence
472	Unclassified_Zixibacteria_11_ASV4975	Unclassified_Zixibacteria_11_ASV4975	Presence	Absence
473	Unclassified_Zixibacteria_13_ASV4977	Unclassified_Zixibacteria_13_ASV4977	Presence	Absence
474	Unclassified_Zixibacteria_20_ASV4985	Unclassified_Zixibacteria_20_ASV4985	Presence	Absence
475	Unclassified_Zixibacteria_3_ASV4995	Unclassified_Zixibacteria_3_ASV4995	Presence	Absence
476	Unclassified_Latescibacterota_7_ASV3742	Unclassified_Latescibacterota_7_ASV3742	Presence	Absence
477	Unclassified_Latescibacterota_9_ASV3744	Unclassified_Latescibacterota_9_ASV3744	Presence	Absence
478	Unclassified_WCHB1-41_3_ASV4915	Unclassified_WCHB1-41_3_ASV4915	Presence	Absence
479	Unclassified_WCHB1-41_8_ASV4920	Unclassified_WCHB1-41_8_ASV4920	Presence	Absence
480	Unclassified_WCHB1-41_5_ASV4917	Unclassified_WCHB1-41_5_ASV4917	Presence	Absence
481	Unclassified_WCHB1-41_9_ASV4921	Unclassified_WCHB1-41_9_ASV4921	Presence	Absence
482	Unclassified_WCHB1-41_2_ASV4914	Unclassified_WCHB1-41_2_ASV4914	Presence	Absence
483	Unclassified_WCHB1-41_7_ASV4919	Unclassified_WCHB1-41_7_ASV4919	Presence	Absence
484	Unclassified_Chitinivibrionia_1_ASV3009	Unclassified_Chitinivibrionia_1_ASV3009	Presence	Absence
485	Unclassified_Acidobacteriales_1_ASV2482	Unclassified_Acidobacteriales_1_ASV2482	Presence	Absence
486	Unclassified_Fermentibacteraceae_1_ASV3378	Unclassified_Fermentibacteraceae_1_ASV3378	Presence	Absence
487	Unclassified_Fermentibacteraceae_2_ASV3379	Unclassified_Fermentibacteraceae_2_ASV3379	Presence	Absence
488	RBG-16-49-21_ASV1810	RBG-16-49-21_ASV1810	Presence	Absence
489	Unclassified_LD1-PA32_ASV1195	Unclassified_LD1-PA32_ASV1195	Presence	Absence
490	Unclassified_0319-6G20_5_ASV2423	Unclassified_0319-6G20_5_ASV2423	Presence	Absence
491	Unclassified_CK-2C2-2_1_ASV3077	Unclassified_CK-2C2-2_1_ASV3077	Presence	Absence
492	Unclassified_Acidobacteriales_2_ASV2483	Unclassified_Acidobacteriales_2_ASV2483	Presence	Absence
493	Candidatus_Latescibacter_ASV438	Candidatus_Latescibacter_ASV438	Presence	Absence
494	Unclassified_Spirochaetaceae_8_ASV4776	Unclassified_Spirochaetaceae_8_ASV4776	Presence	Absence
495	Unclassified_Spirochaetaceae_15_ASV4767	Unclassified_Spirochaetaceae_15_ASV4767	Presence	Absence
496	Unclassified_Spirochaetaceae_10_ASV4762	Unclassified_Spirochaetaceae_10_ASV4762	Presence	Absence
497	Unclassified_Spirochaetaceae_9_ASV4777	Unclassified_Spirochaetaceae_9_ASV4777	Presence	Absence
498	Unclassified_Sva0485_3_ASV4827	Unclassified_Sva0485_3_ASV4827	Presence	Absence
499	Candidatus_Omnitrophus_ASV449	Candidatus_Omnitrophus_ASV449	Presence	Absence
500	Candidatus_Omnitrophus_ASV445	Candidatus_Omnitrophus_ASV445	Presence	Absence
501	Candidatus_Omnitrophus_ASV447	Candidatus_Omnitrophus_ASV447	Presence	Absence
502	Candidatus_Omnitrophus_ASV458	Candidatus_Omnitrophus_ASV458	Presence	Absence
503	Candidatus_Omnitrophus_ASV455	Candidatus_Omnitrophus_ASV455	Presence	Absence
504	Candidatus_Omnitrophus_ASV453	Candidatus_Omnitrophus_ASV453	Presence	Absence
505	Candidatus_Omnitrophus_ASV444	Candidatus_Omnitrophus_ASV444	Presence	Absence
506	Candidatus_Omnitrophus_ASV459	Candidatus_Omnitrophus_ASV459	Presence	Absence
507	Candidatus_Omnitrophus_ASV448	Candidatus_Omnitrophus_ASV448	Presence	Absence
508	Candidatus_Omnitrophus_ASV457	Candidatus_Omnitrophus_ASV457	Presence	Absence
509	Candidatus_Omnitrophus_ASV446	Candidatus_Omnitrophus_ASV446	Presence	Absence
510	Unclassified_Latescibacterota_5_ASV3740	Unclassified_Latescibacterota_5_ASV3740	Presence	Absence
511	Unclassified_Latescibacterota_10_ASV3734	Unclassified_Latescibacterota_10_ASV3734	Presence	Absence
512	Candidatus_Omnitrophus_ASV454	Candidatus_Omnitrophus_ASV454	Presence	Absence
513	Candidatus_Omnitrophus_ASV456	Candidatus_Omnitrophus_ASV456	Presence	Absence
514	Unclassified_Spirochaetaceae_14_ASV4766	Unclassified_Spirochaetaceae_14_ASV4766	Presence	Absence
515	Unclassified_Spirochaetaceae_16_ASV4768	Unclassified_Spirochaetaceae_16_ASV4768	Presence	Absence
516	Brachyspira_ASV353	Brachyspira_ASV353	Presence	Absence
517	Unclassified_Spirochaetaceae_5_ASV4773	Unclassified_Spirochaetaceae_5_ASV4773	Presence	Absence
518	Unclassified_Spirochaetaceae_12_ASV4764	Unclassified_Spirochaetaceae_12_ASV4764	Presence	Absence
519	Unclassified_Spirochaetaceae_7_ASV4775	Unclassified_Spirochaetaceae_7_ASV4775	Presence	Absence
520	Spirochaeta_ASV2159	Spirochaeta_ASV2159	Presence	Absence
521	Spirochaeta_ASV2162	Spirochaeta_ASV2162	Presence	Absence
522	Spirochaeta_ASV2147	Spirochaeta_ASV2147	Presence	Absence
523	Spirochaeta_ASV2168	Spirochaeta_ASV2168	Presence	Absence
524	Spirochaeta_ASV2169	Spirochaeta_ASV2169	Presence	Absence
525	Spirochaeta_ASV2151	Spirochaeta_ASV2151	Presence	Absence
526	Spirochaeta_ASV2161	Spirochaeta_ASV2161	Presence	Absence
527	Spirochaeta_ASV2163	Spirochaeta_ASV2163	Presence	Absence
528	Spirochaeta_ASV2156	Spirochaeta_ASV2156	Presence	Absence
529	Spirochaeta_ASV2170	Spirochaeta_ASV2170	Presence	Absence
530	Spirochaeta_ASV2153	Spirochaeta_ASV2153	Presence	Absence
531	Spirochaeta_ASV2148	Spirochaeta_ASV2148	Presence	Absence
532	Unclassified_Spirochaetaceae_6_ASV4774	Unclassified_Spirochaetaceae_6_ASV4774	Presence	Absence
533	Spirochaeta_2_ASV2180	Spirochaeta_2_ASV2180	Presence	Absence
534	Spirochaeta_ASV2165	Spirochaeta_ASV2165	Presence	Absence
535	Spirochaeta_ASV2150	Spirochaeta_ASV2150	Presence	Absence
536	Spirochaeta_ASV2164	Spirochaeta_ASV2164	Presence	Absence
537	Spirochaeta_ASV2172	Spirochaeta_ASV2172	Presence	Absence
538	Spirochaeta_ASV2171	Spirochaeta_ASV2171	Presence	Absence
539	Spirochaeta_2_ASV2188	Spirochaeta_2_ASV2188	Presence	Absence
540	Treponema_ASV2376	Treponema_ASV2376	Presence	Absence
541	Spirochaeta_2_ASV2187	Spirochaeta_2_ASV2187	Presence	Absence
542	Spirochaeta_2_ASV2204	Spirochaeta_2_ASV2204	Presence	Absence
543	Spirochaeta_2_ASV2189	Spirochaeta_2_ASV2189	Presence	Absence
544	Spirochaeta_2_ASV2182	Spirochaeta_2_ASV2182	Presence	Absence
545	Spirochaeta_2_ASV2174	Spirochaeta_2_ASV2174	Presence	Absence
546	Spirochaeta_ASV2167	Spirochaeta_ASV2167	Presence	Absence
547	Spirochaeta_ASV2166	Spirochaeta_ASV2166	Presence	Absence
548	Spirochaeta_ASV2149	Spirochaeta_ASV2149	Presence	Absence
549	Spirochaeta_ASV2157	Spirochaeta_ASV2157	Presence	Absence
550	Spirochaeta_ASV2160	Spirochaeta_ASV2160	Presence	Absence
551	Spirochaeta_2_ASV2194	Spirochaeta_2_ASV2194	Presence	Absence
552	Spirochaeta_2_ASV2210	Spirochaeta_2_ASV2210	Presence	Absence
553	Spirochaeta_2_ASV2178	Spirochaeta_2_ASV2178	Presence	Absence
554	Spirochaeta_2_ASV2199	Spirochaeta_2_ASV2199	Presence	Absence
555	Spirochaeta_2_ASV2186	Spirochaeta_2_ASV2186	Presence	Absence
556	Spirochaeta_2_ASV2173	Spirochaeta_2_ASV2173	Presence	Absence
557	Spirochaeta_2_ASV2179	Spirochaeta_2_ASV2179	Presence	Absence
558	Spirochaeta_2_ASV2176	Spirochaeta_2_ASV2176	Presence	Absence
559	Spirochaeta_2_ASV2201	Spirochaeta_2_ASV2201	Presence	Absence
560	Spirochaeta_2_ASV2195	Spirochaeta_2_ASV2195	Presence	Absence
561	Spirochaeta_2_ASV2200	Spirochaeta_2_ASV2200	Presence	Absence
562	Spirochaeta_2_ASV2184	Spirochaeta_2_ASV2184	Presence	Absence
563	Unclassified_Spirochaetaceae_1_ASV4761	Unclassified_Spirochaetaceae_1_ASV4761	Presence	Absence
564	Unclassified_Spirochaetaceae_2_ASV4770	Unclassified_Spirochaetaceae_2_ASV4770	Presence	Absence
565	Spirochaeta_2_ASV2191	Spirochaeta_2_ASV2191	Presence	Absence
566	Spirochaeta_2_ASV2206	Spirochaeta_2_ASV2206	Presence	Absence
567	Spirochaeta_2_ASV2203	Spirochaeta_2_ASV2203	Presence	Absence
568	Spirochaeta_2_ASV2196	Spirochaeta_2_ASV2196	Presence	Absence
569	Spirochaeta_2_ASV2197	Spirochaeta_2_ASV2197	Presence	Absence
570	Spirochaeta_2_ASV2208	Spirochaeta_2_ASV2208	Presence	Absence
571	Spirochaeta_2_ASV2211	Spirochaeta_2_ASV2211	Presence	Absence
572	Sediminispirochaeta_ASV2061	Sediminispirochaeta_ASV2061	Presence	Absence
573	Spirochaeta_2_ASV2190	Spirochaeta_2_ASV2190	Presence	Absence
574	Spirochaeta_ASV2154	Spirochaeta_ASV2154	Presence	Absence
575	Sediminispirochaeta_ASV2057	Sediminispirochaeta_ASV2057	Presence	Absence
576	Sphaerochaeta_ASV2111	Sphaerochaeta_ASV2111	Presence	Absence
577	Sediminispirochaeta_ASV2053	Sediminispirochaeta_ASV2053	Presence	Absence
578	Unclassified_Spirochaetaceae_3_ASV4771	Unclassified_Spirochaetaceae_3_ASV4771	Presence	Absence
579	Spirochaeta_2_ASV2192	Spirochaeta_2_ASV2192	Presence	Absence
580	Unclassified_Spirochaetaceae_4_ASV4772	Unclassified_Spirochaetaceae_4_ASV4772	Presence	Absence
581	Candidatus_Marispirochaeta_ASV442	Candidatus_Marispirochaeta_ASV442	Presence	Absence
582	Candidatus_Marispirochaeta_ASV441	Candidatus_Marispirochaeta_ASV441	Presence	Absence
583	Sediminispirochaeta_ASV2060	Sediminispirochaeta_ASV2060	Presence	Absence
584	Sediminispirochaeta_ASV2059	Sediminispirochaeta_ASV2059	Presence	Absence
585	Sediminispirochaeta_ASV2054	Sediminispirochaeta_ASV2054	Presence	Absence
586	GWE2-31-10_ASV1038	GWE2-31-10_ASV1038	Presence	Absence
587	GWE2-31-10_ASV1039	GWE2-31-10_ASV1039	Presence	Absence
588	Spirochaeta_2_ASV2185	Spirochaeta_2_ASV2185	Presence	Absence
589	Spirochaeta_2_ASV2193	Spirochaeta_2_ASV2193	Presence	Absence
590	Spirochaeta_2_ASV2181	Spirochaeta_2_ASV2181	Presence	Absence
591	Alkalispirochaeta_ASV133	Alkalispirochaeta_ASV133	Presence	Absence
592	Unclassified_Spirochaetaceae_13_ASV4765	Unclassified_Spirochaetaceae_13_ASV4765	Presence	Absence
593	Unclassified_cvE6_2_ASV3150	Unclassified_cvE6_2_ASV3150	Presence	Absence
594	Chlamydia_ASV511	Chlamydia_ASV511	Presence	Absence
595	Unclassified_Parachlamydiaceae_3_ASV4024	Unclassified_Parachlamydiaceae_3_ASV4024	Presence	Absence
596	Candidatus_Rhabdochlamydia_ASV465	Candidatus_Rhabdochlamydia_ASV465	Presence	Absence
597	Unclassified_Parachlamydiaceae_1_ASV4022	Unclassified_Parachlamydiaceae_1_ASV4022	Presence	Absence
598	Unclassified_Parachlamydiaceae_5_ASV4026	Unclassified_Parachlamydiaceae_5_ASV4026	Presence	Absence
599	Unclassified_Sumerlaeia_2_ASV4820	Unclassified_Sumerlaeia_2_ASV4820	Presence	Absence
600	Unclassified_Sumerlaeia_4_ASV4822	Unclassified_Sumerlaeia_4_ASV4822	Presence	Absence
601	Unclassified_Subgroup_22_7_ASV4810	Unclassified_Subgroup_22_7_ASV4810	Presence	Absence
602	Unclassified_Subgroup_22_8_ASV4811	Unclassified_Subgroup_22_8_ASV4811	Presence	Absence
603	Unclassified_Subgroup_22_3_ASV4806	Unclassified_Subgroup_22_3_ASV4806	Presence	Absence
604	Unclassified_Subgroup_22_6_ASV4809	Unclassified_Subgroup_22_6_ASV4809	Presence	Absence
605	Unclassified_vadinHA49_2_ASV4878	Unclassified_vadinHA49_2_ASV4878	Presence	Absence
606	Unclassified_vadinHA49_20_ASV4879	Unclassified_vadinHA49_20_ASV4879	Presence	Absence
607	Unclassified_vadinHA49_19_ASV4877	Unclassified_vadinHA49_19_ASV4877	Presence	Absence
608	Unclassified_Pla4_lineage_12_ASV4172	Unclassified_Pla4_lineage_12_ASV4172	Presence	Absence
609	Unclassified_Pla4_lineage_3_ASV4176	Unclassified_Pla4_lineage_3_ASV4176	Presence	Absence
610	Unclassified_Pla4_lineage_9_ASV4182	Unclassified_Pla4_lineage_9_ASV4182	Presence	Absence
611	Unclassified_Pla4_lineage_10_ASV4170	Unclassified_Pla4_lineage_10_ASV4170	Presence	Absence
612	Unclassified_Planctomycetota_9_ASV4220	Unclassified_Planctomycetota_9_ASV4220	Presence	Absence
613	Unclassified_Planctomycetota_2_ASV4213	Unclassified_Planctomycetota_2_ASV4213	Presence	Absence
614	Unclassified_Planctomycetota_14_ASV4209	Unclassified_Planctomycetota_14_ASV4209	Presence	Absence
615	Unclassified_Pla4_lineage_2_ASV4175	Unclassified_Pla4_lineage_2_ASV4175	Presence	Absence
616	Unclassified_OM190_12_ASV4003	Unclassified_OM190_12_ASV4003	Presence	Absence
617	Unclassified_Planctomycetota_6_ASV4217	Unclassified_Planctomycetota_6_ASV4217	Presence	Absence
618	Unclassified_Planctomycetota_16_ASV4211	Unclassified_Planctomycetota_16_ASV4211	Presence	Absence
619	Unclassified_Planctomycetota_13_ASV4208	Unclassified_Planctomycetota_13_ASV4208	Presence	Absence
620	Unclassified_Planctomycetota_8_ASV4219	Unclassified_Planctomycetota_8_ASV4219	Presence	Absence
621	Unclassified_Pla3_lineage_10_ASV4156	Unclassified_Pla3_lineage_10_ASV4156	Presence	Absence
622	Unclassified_Planctomycetota_1_ASV4204	Unclassified_Planctomycetota_1_ASV4204	Presence	Absence
623	Unclassified_Planctomycetota_17_ASV4212	Unclassified_Planctomycetota_17_ASV4212	Presence	Absence
624	Unclassified_Planctomycetota_7_ASV4218	Unclassified_Planctomycetota_7_ASV4218	Presence	Absence
625	Unclassified_Planctomycetota_10_ASV4205	Unclassified_Planctomycetota_10_ASV4205	Presence	Absence
626	Unclassified_Pla4_lineage_8_ASV4181	Unclassified_Pla4_lineage_8_ASV4181	Presence	Absence
627	Unclassified_Planctomycetota_5_ASV4216	Unclassified_Planctomycetota_5_ASV4216	Presence	Absence
628	Unclassified_DG-20_1_ASV3302	Unclassified_DG-20_1_ASV3302	Presence	Absence
629	Unclassified_DG-20_2_ASV3303	Unclassified_DG-20_2_ASV3303	Presence	Absence
630	Unclassified_ST-NAGAB-D1_ASV2235	Unclassified_ST-NAGAB-D1_ASV2235	Presence	Absence
631	Unclassified_SM23-30_1_ASV4733	Unclassified_SM23-30_1_ASV4733	Presence	Absence
632	Unclassified_SM23-30_2_ASV4734	Unclassified_SM23-30_2_ASV4734	Presence	Absence
633	Unclassified_SG8-4_1_ASV4715	Unclassified_SG8-4_1_ASV4715	Presence	Absence
634	Unclassified_SG8-4_3_ASV4717	Unclassified_SG8-4_3_ASV4717	Presence	Absence
635	Unclassified_SG8-4_5_ASV4719	Unclassified_SG8-4_5_ASV4719	Presence	Absence
636	Unclassified_SG8-4_7_ASV4721	Unclassified_SG8-4_7_ASV4721	Presence	Absence
637	Unclassified_SG8-4_8_ASV4722	Unclassified_SG8-4_8_ASV4722	Presence	Absence
638	Unclassified_SG8-4_4_ASV4718	Unclassified_SG8-4_4_ASV4718	Presence	Absence
639	Unclassified_4572-13_1_ASV2426	Unclassified_4572-13_1_ASV2426	Presence	Absence
640	SM1A02_ASV2099	SM1A02_ASV2099	Presence	Absence
641	SM1A02_ASV2097	SM1A02_ASV2097	Presence	Absence
642	Unclassified_Phycisphaeraceae_3_ASV4116	Unclassified_Phycisphaeraceae_3_ASV4116	Presence	Absence
643	CL500-3_ASV561	CL500-3_ASV561	Presence	Absence
644	Urania-1B-19_marine_sediment_group_ASV5024	Urania-1B-19_marine_sediment_group_ASV5024	Presence	Absence
645	Urania-1B-19_marine_sediment_group_ASV5026	Urania-1B-19_marine_sediment_group_ASV5026	Presence	Absence
646	Urania-1B-19_marine_sediment_group_ASV5022	Urania-1B-19_marine_sediment_group_ASV5022	Presence	Absence
647	Urania-1B-19_marine_sediment_group_ASV5021	Urania-1B-19_marine_sediment_group_ASV5021	Presence	Absence
648	Urania-1B-19_marine_sediment_group_ASV5020	Urania-1B-19_marine_sediment_group_ASV5020	Presence	Absence
649	Unclassified_WD2101_soil_group_7_ASV4928	Unclassified_WD2101_soil_group_7_ASV4928	Presence	Absence
650	Unclassified_WD2101_soil_group_5_ASV4926	Unclassified_WD2101_soil_group_5_ASV4926	Presence	Absence
651	Unclassified_WD2101_soil_group_8_ASV4929	Unclassified_WD2101_soil_group_8_ASV4929	Presence	Absence
652	Unclassified_Tepidisphaeraceae_ASV2329	Unclassified_Tepidisphaeraceae_ASV2329	Presence	Absence
653	Unclassified_WD2101_soil_group_4_ASV4925	Unclassified_WD2101_soil_group_4_ASV4925	Presence	Absence
654	Unclassified_Phycisphaeraceae_15_ASV4109	Unclassified_Phycisphaeraceae_15_ASV4109	Presence	Absence
655	Unclassified_Phycisphaeraceae_4_ASV4117	Unclassified_Phycisphaeraceae_4_ASV4117	Presence	Absence
656	Unclassified_Phycisphaeraceae_7_ASV4120	Unclassified_Phycisphaeraceae_7_ASV4120	Presence	Absence
657	Unclassified_Phycisphaeraceae_9_ASV4122	Unclassified_Phycisphaeraceae_9_ASV4122	Presence	Absence
658	Unclassified_Phycisphaeraceae_20_ASV4115	Unclassified_Phycisphaeraceae_20_ASV4115	Presence	Absence
659	Unclassified_Phycisphaeraceae_5_ASV4118	Unclassified_Phycisphaeraceae_5_ASV4118	Presence	Absence
660	Unclassified_Phycisphaerae_2_ASV4124	Unclassified_Phycisphaerae_2_ASV4124	Presence	Absence
661	Unclassified_Phycisphaeraceae_13_ASV4107	Unclassified_Phycisphaeraceae_13_ASV4107	Presence	Absence
662	Unclassified_Phycisphaeraceae_17_ASV4111	Unclassified_Phycisphaeraceae_17_ASV4111	Presence	Absence
663	Unclassified_Phycisphaeraceae_19_ASV4113	Unclassified_Phycisphaeraceae_19_ASV4113	Presence	Absence
664	Unclassified_Phycisphaeraceae_10_ASV4104	Unclassified_Phycisphaeraceae_10_ASV4104	Presence	Absence
665	Unclassified_Phycisphaeraceae_18_ASV4112	Unclassified_Phycisphaeraceae_18_ASV4112	Presence	Absence
666	Unclassified_Phycisphaeraceae_12_ASV4106	Unclassified_Phycisphaeraceae_12_ASV4106	Presence	Absence
667	Unclassified_Phycisphaeraceae_1_ASV4103	Unclassified_Phycisphaeraceae_1_ASV4103	Presence	Absence
668	Unclassified_Phycisphaeraceae_2_ASV4114	Unclassified_Phycisphaeraceae_2_ASV4114	Presence	Absence
669	Unclassified_L21-RPul-D3_ASV1148	Unclassified_L21-RPul-D3_ASV1148	Presence	Absence
670	Unclassified_AKAU3564_sediment_group_5_ASV2526	Unclassified_AKAU3564_sediment_group_5_ASV2526	Presence	Absence
671	Unclassified_AKAU3564_sediment_group_1_ASV2515	Unclassified_AKAU3564_sediment_group_1_ASV2515	Presence	Absence
672	Unclassified_AKAU3564_sediment_group_16_ASV2522	Unclassified_AKAU3564_sediment_group_16_ASV2522	Presence	Absence
673	Unclassified_AKAU3564_sediment_group_6_ASV2527	Unclassified_AKAU3564_sediment_group_6_ASV2527	Presence	Absence
674	Unclassified_AKAU3564_sediment_group_13_ASV2519	Unclassified_AKAU3564_sediment_group_13_ASV2519	Presence	Absence
675	Unclassified_AKAU3564_sediment_group_7_ASV2528	Unclassified_AKAU3564_sediment_group_7_ASV2528	Presence	Absence
676	Unclassified_AKAU3564_sediment_group_11_ASV2517	Unclassified_AKAU3564_sediment_group_11_ASV2517	Presence	Absence
677	Unclassified_AKAU3564_sediment_group_14_ASV2520	Unclassified_AKAU3564_sediment_group_14_ASV2520	Presence	Absence
678	Unclassified_AKAU3564_sediment_group_4_ASV2525	Unclassified_AKAU3564_sediment_group_4_ASV2525	Presence	Absence
679	Unclassified_AKAU3564_sediment_group_9_ASV2530	Unclassified_AKAU3564_sediment_group_9_ASV2530	Presence	Absence
680	Unclassified_AKAU3564_sediment_group_10_ASV2516	Unclassified_AKAU3564_sediment_group_10_ASV2516	Presence	Absence
681	Unclassified_AKAU3564_sediment_group_8_ASV2529	Unclassified_AKAU3564_sediment_group_8_ASV2529	Presence	Absence
682	Unclassified_AKAU3564_sediment_group_15_ASV2521	Unclassified_AKAU3564_sediment_group_15_ASV2521	Presence	Absence
683	Unclassified_AKAU3564_sediment_group_3_ASV2524	Unclassified_AKAU3564_sediment_group_3_ASV2524	Presence	Absence
684	Unclassified_AKAU3564_sediment_group_12_ASV2518	Unclassified_AKAU3564_sediment_group_12_ASV2518	Presence	Absence
685	Unclassified_Phycisphaerae_1_ASV4123	Unclassified_Phycisphaerae_1_ASV4123	Presence	Absence
686	Unclassified_mle1-8_4_ASV3890	Unclassified_mle1-8_4_ASV3890	Presence	Absence
687	Unclassified_mle1-8_2_ASV3888	Unclassified_mle1-8_2_ASV3888	Presence	Absence
688	Unclassified_mle1-8_1_ASV3887	Unclassified_mle1-8_1_ASV3887	Presence	Absence
689	Unclassified_mle1-8_7_ASV3893	Unclassified_mle1-8_7_ASV3893	Presence	Absence
690	Unclassified_mle1-8_6_ASV3892	Unclassified_mle1-8_6_ASV3892	Presence	Absence
691	Unclassified_CCM11a_1_ASV2999	Unclassified_CCM11a_1_ASV2999	Presence	Absence
692	Unclassified_CCM11a_6_ASV3004	Unclassified_CCM11a_6_ASV3004	Presence	Absence
693	Unclassified_CCM11a_2_ASV3000	Unclassified_CCM11a_2_ASV3000	Presence	Absence
694	Unclassified_CCM11a_5_ASV3003	Unclassified_CCM11a_5_ASV3003	Presence	Absence
695	Unclassified_Gemmataceae_11_ASV3557	Unclassified_Gemmataceae_11_ASV3557	Presence	Absence
696	Unclassified_Gemmataceae_12_ASV3558	Unclassified_Gemmataceae_12_ASV3558	Presence	Absence
697	Tundrisphaera_ASV2391	Tundrisphaera_ASV2391	Presence	Absence
698	Aquisphaera_ASV208	Aquisphaera_ASV208	Presence	Absence
699	Unclassified_Isosphaeraceae_2_ASV3644	Unclassified_Isosphaeraceae_2_ASV3644	Presence	Absence
700	Paludisphaera_ASV1583	Paludisphaera_ASV1583	Presence	Absence
701	Paludisphaera_ASV1584	Paludisphaera_ASV1584	Presence	Absence
702	Fimbriiglobus_ASV928	Fimbriiglobus_ASV928	Presence	Absence
703	Gemmata_ASV1002	Gemmata_ASV1002	Presence	Absence
704	Fimbriiglobus_ASV925	Fimbriiglobus_ASV925	Presence	Absence
705	Fimbriiglobus_ASV922	Fimbriiglobus_ASV922	Presence	Absence
706	Gemmata_ASV1000	Gemmata_ASV1000	Presence	Absence
707	Gemmata_ASV1001	Gemmata_ASV1001	Presence	Absence
708	Fimbriiglobus_ASV923	Fimbriiglobus_ASV923	Presence	Absence
709	Gemmata_ASV999	Gemmata_ASV999	Presence	Absence
710	Unclassified_Planctomycetes_2_ASV4203	Unclassified_Planctomycetes_2_ASV4203	Presence	Absence
711	Unclassified_Planctomycetales_14_ASV4188	Unclassified_Planctomycetales_14_ASV4188	Presence	Absence
712	Unclassified_Planctomycetales_16_ASV4190	Unclassified_Planctomycetales_16_ASV4190	Presence	Absence
713	Unclassified_Planctomycetales_7_ASV4199	Unclassified_Planctomycetales_7_ASV4199	Presence	Absence
714	Unclassified_Planctomycetales_1_ASV4183	Unclassified_Planctomycetales_1_ASV4183	Presence	Absence
715	Unclassified_Rubinisphaeraceae_3_ASV4486	Unclassified_Rubinisphaeraceae_3_ASV4486	Presence	Absence
716	Unclassified_Planctomycetales_5_ASV4197	Unclassified_Planctomycetales_5_ASV4197	Presence	Absence
717	SH-PL14_ASV2086	SH-PL14_ASV2086	Presence	Absence
718	Unclassified_Planctomycetales_2_ASV4194	Unclassified_Planctomycetales_2_ASV4194	Presence	Absence
719	SH-PL14_ASV2082	SH-PL14_ASV2082	Presence	Absence
720	SH-PL14_ASV2084	SH-PL14_ASV2084	Presence	Absence
721	Planctomicrobium_ASV1697	Planctomicrobium_ASV1697	Presence	Absence
722	Planctopirus_ASV1699	Planctopirus_ASV1699	Presence	Absence
723	Unclassified_Rubinisphaeraceae_2_ASV4485	Unclassified_Rubinisphaeraceae_2_ASV4485	Presence	Absence
724	Rubinisphaera_ASV1934	Rubinisphaera_ASV1934	Presence	Absence
725	Unclassified_Planctomycetales_15_ASV4189	Unclassified_Planctomycetales_15_ASV4189	Presence	Absence
726	Unclassified_Gimesiaceae_1_ASV3585	Unclassified_Gimesiaceae_1_ASV3585	Presence	Absence
727	Unclassified_Planctomycetales_13_ASV4187	Unclassified_Planctomycetales_13_ASV4187	Presence	Absence
728	Unclassified_Planctomycetales_12_ASV4186	Unclassified_Planctomycetales_12_ASV4186	Presence	Absence
729	Unclassified_Gimesiaceae_4_ASV3588	Unclassified_Gimesiaceae_4_ASV3588	Presence	Absence
730	Unclassified_Planctomycetales_4_ASV4196	Unclassified_Planctomycetales_4_ASV4196	Presence	Absence
731	Unclassified_Planctomycetales_19_ASV4193	Unclassified_Planctomycetales_19_ASV4193	Presence	Absence
732	Termite_planctomycete_cluster_ASV2330	Termite_planctomycete_cluster_ASV2330	Presence	Absence
733	Pir4_lineage_ASV1677	Pir4_lineage_ASV1677	Presence	Absence
734	Pirellula_ASV1690	Pirellula_ASV1690	Presence	Absence
735	Pirellula_ASV1696	Pirellula_ASV1696	Presence	Absence
736	Pir4_lineage_ASV1683	Pir4_lineage_ASV1683	Presence	Absence
737	Pir4_lineage_ASV1684	Pir4_lineage_ASV1684	Presence	Absence
738	Pir4_lineage_ASV1676	Pir4_lineage_ASV1676	Presence	Absence
739	Rhodopirellula_ASV1862	Rhodopirellula_ASV1862	Presence	Absence
740	Rubripirellula_ASV1940	Rubripirellula_ASV1940	Presence	Absence
741	Blastopirellula_ASV341	Blastopirellula_ASV341	Presence	Absence
742	Blastopirellula_ASV339	Blastopirellula_ASV339	Presence	Absence
743	Rhodopirellula_ASV1857	Rhodopirellula_ASV1857	Presence	Absence
744	Rhodopirellula_ASV1853	Rhodopirellula_ASV1853	Presence	Absence
745	Rhodopirellula_ASV1858	Rhodopirellula_ASV1858	Presence	Absence
746	Blastopirellula_ASV338	Blastopirellula_ASV338	Presence	Absence
747	Rhodopirellula_ASV1856	Rhodopirellula_ASV1856	Presence	Absence
748	Unclassified_Pirellulaceae_2_ASV4136	Unclassified_Pirellulaceae_2_ASV4136	Presence	Absence
749	Pir4_lineage_ASV1679	Pir4_lineage_ASV1679	Presence	Absence
750	Pir4_lineage_ASV1682	Pir4_lineage_ASV1682	Presence	Absence
751	Unclassified_Pirellulaceae_14_ASV4130	Unclassified_Pirellulaceae_14_ASV4130	Presence	Absence
752	Unclassified_Pirellulaceae_13_ASV4129	Unclassified_Pirellulaceae_13_ASV4129	Presence	Absence
753	Unclassified_Pirellulaceae_8_ASV4151	Unclassified_Pirellulaceae_8_ASV4151	Presence	Absence
754	Unclassified_Pirellulaceae_25_ASV4142	Unclassified_Pirellulaceae_25_ASV4142	Presence	Absence
755	Unclassified_Pirellulaceae_18_ASV4134	Unclassified_Pirellulaceae_18_ASV4134	Presence	Absence
756	Unclassified_Pirellulaceae_23_ASV4140	Unclassified_Pirellulaceae_23_ASV4140	Presence	Absence
757	Rhodopirellula_ASV1859	Rhodopirellula_ASV1859	Presence	Absence
758	Unclassified_OM190_9_ASV4014	Unclassified_OM190_9_ASV4014	Presence	Absence
759	Unclassified_Planctomycetota_4_ASV4215	Unclassified_Planctomycetota_4_ASV4215	Presence	Absence
760	Candidatus_Kuenenia_ASV437	Candidatus_Kuenenia_ASV437	Presence	Absence
761	Unclassified_OM190_11_ASV4002	Unclassified_OM190_11_ASV4002	Presence	Absence
762	Unclassified_OM190_8_ASV4013	Unclassified_OM190_8_ASV4013	Presence	Absence
763	Unclassified_OM190_15_ASV4006	Unclassified_OM190_15_ASV4006	Presence	Absence
764	Unclassified_OM190_7_ASV4012	Unclassified_OM190_7_ASV4012	Presence	Absence
765	Unclassified_OM190_10_ASV4001	Unclassified_OM190_10_ASV4001	Presence	Absence
766	Unclassified_OM190_3_ASV4008	Unclassified_OM190_3_ASV4008	Presence	Absence
767	Unclassified_028H05-P-BN-P5_ASV13	Unclassified_028H05-P-BN-P5_ASV13	Presence	Absence
768	Unclassified_Pla4_lineage_5_ASV4178	Unclassified_Pla4_lineage_5_ASV4178	Presence	Absence
769	Unclassified_Pla4_lineage_13_ASV4173	Unclassified_Pla4_lineage_13_ASV4173	Presence	Absence
770	Unclassified_Pla4_lineage_14_ASV4174	Unclassified_Pla4_lineage_14_ASV4174	Presence	Absence
771	Unclassified_Pla4_lineage_1_ASV4169	Unclassified_Pla4_lineage_1_ASV4169	Presence	Absence
772	Unclassified_Pla4_lineage_11_ASV4171	Unclassified_Pla4_lineage_11_ASV4171	Presence	Absence
773	Unclassified_BD7-11_3_ASV2873	Unclassified_BD7-11_3_ASV2873	Presence	Absence
774	Unclassified_BD7-11_4_ASV2874	Unclassified_BD7-11_4_ASV2874	Presence	Absence
775	Unclassified_Pla3_lineage_7_ASV4166	Unclassified_Pla3_lineage_7_ASV4166	Presence	Absence
776	Unclassified_Pla3_lineage_3_ASV4162	Unclassified_Pla3_lineage_3_ASV4162	Presence	Absence
777	Unclassified_OM190_13_ASV4004	Unclassified_OM190_13_ASV4004	Presence	Absence
778	Unclassified_Pla3_lineage_9_ASV4168	Unclassified_Pla3_lineage_9_ASV4168	Presence	Absence
779	Unclassified_Pla3_lineage_8_ASV4167	Unclassified_Pla3_lineage_8_ASV4167	Presence	Absence
780	Unclassified_Pla3_lineage_4_ASV4163	Unclassified_Pla3_lineage_4_ASV4163	Presence	Absence
781	Unclassified_Pla3_lineage_6_ASV4165	Unclassified_Pla3_lineage_6_ASV4165	Presence	Absence
782	Unclassified_Pla3_lineage_1_ASV4155	Unclassified_Pla3_lineage_1_ASV4155	Presence	Absence
783	Unclassified_Pla3_lineage_14_ASV4160	Unclassified_Pla3_lineage_14_ASV4160	Presence	Absence
784	Unclassified_Planctomycetota_15_ASV4210	Unclassified_Planctomycetota_15_ASV4210	Presence	Absence
785	Unclassified_Pla3_lineage_11_ASV4157	Unclassified_Pla3_lineage_11_ASV4157	Presence	Absence
786	Unclassified_Pla3_lineage_13_ASV4159	Unclassified_Pla3_lineage_13_ASV4159	Presence	Absence
787	Unclassified_Pla3_lineage_2_ASV4161	Unclassified_Pla3_lineage_2_ASV4161	Presence	Absence
788	Unclassified_Pla4_lineage_7_ASV4180	Unclassified_Pla4_lineage_7_ASV4180	Presence	Absence
789	Unclassified_Subgroup_9_2_ASV4818	Unclassified_Subgroup_9_2_ASV4818	Presence	Absence
790	Unclassified_Vicinamibacterales_6_ASV4909	Unclassified_Vicinamibacterales_6_ASV4909	Presence	Absence
791	Unclassified_Vicinamibacterales_1_ASV4904	Unclassified_Vicinamibacterales_1_ASV4904	Presence	Absence
792	Unclassified_Vicinamibacteraceae_5_ASV4901	Unclassified_Vicinamibacteraceae_5_ASV4901	Presence	Absence
793	Unclassified_Subgroup_22_1_ASV4804	Unclassified_Subgroup_22_1_ASV4804	Presence	Absence
794	Cerasicoccus_ASV506	Cerasicoccus_ASV506	Presence	Absence
795	Verruc-01_ASV5044	Verruc-01_ASV5044	Presence	Absence
796	Verruc-01_ASV5041	Verruc-01_ASV5041	Presence	Absence
797	Verruc-01_ASV5045	Verruc-01_ASV5045	Presence	Absence
798	Verruc-01_ASV5046	Verruc-01_ASV5046	Presence	Absence
799	Verruc-01_ASV5042	Verruc-01_ASV5042	Presence	Absence
800	Unclassified_Puniceicoccaceae_1_ASV4267	Unclassified_Puniceicoccaceae_1_ASV4267	Presence	Absence
801	Lentimonas_ASV1234	Lentimonas_ASV1234	Presence	Absence
802	Unclassified_Latescibacteraceae_10_ASV3724	Unclassified_Latescibacteraceae_10_ASV3724	Presence	Absence
803	Unclassified_Latescibacteraceae_8_ASV3731	Unclassified_Latescibacteraceae_8_ASV3731	Presence	Absence
804	Unclassified_Latescibacteraceae_6_ASV3729	Unclassified_Latescibacteraceae_6_ASV3729	Presence	Absence
805	Unclassified_Latescibacteraceae_9_ASV3732	Unclassified_Latescibacteraceae_9_ASV3732	Presence	Absence
806	Unclassified_Latescibacteraceae_4_ASV3727	Unclassified_Latescibacteraceae_4_ASV3727	Presence	Absence
807	Unclassified_Vicinamibacterales_4_ASV4907	Unclassified_Vicinamibacterales_4_ASV4907	Presence	Absence
808	Unclassified_Lenti-02_ASV1231	Unclassified_Lenti-02_ASV1231	Presence	Absence
809	Unclassified_SS1-B-02-17_1_ASV4786	Unclassified_SS1-B-02-17_1_ASV4786	Presence	Absence
810	Unclassified_Lentisphaeria_1_ASV3767	Unclassified_Lentisphaeria_1_ASV3767	Presence	Absence
811	Unclassified_Victivallales_1_ASV4911	Unclassified_Victivallales_1_ASV4911	Presence	Absence
812	Unclassified_SS1-B-02-17_3_ASV4788	Unclassified_SS1-B-02-17_3_ASV4788	Presence	Absence
813	Unclassified_SS1-B-02-17_6_ASV4791	Unclassified_SS1-B-02-17_6_ASV4791	Presence	Absence
814	Unclassified_SS1-B-02-17_4_ASV4789	Unclassified_SS1-B-02-17_4_ASV4789	Presence	Absence
815	Unclassified_SS1-B-02-17_2_ASV4787	Unclassified_SS1-B-02-17_2_ASV4787	Presence	Absence
816	LS-NOB_ASV1274	LS-NOB_ASV1274	Presence	Absence
817	Unclassified_Aminicenantales_3_ASV2582	Unclassified_Aminicenantales_3_ASV2582	Presence	Absence
818	Unclassified_Firmicutes_6_ASV3391	Unclassified_Firmicutes_6_ASV3391	Presence	Absence
819	Unclassified_Aminicenantales_2_ASV2581	Unclassified_Aminicenantales_2_ASV2581	Presence	Absence
820	Unclassified_Aminicenantales_5_ASV2584	Unclassified_Aminicenantales_5_ASV2584	Presence	Absence
821	Unclassified_Methylacidiphilaceae_4_ASV3830	Unclassified_Methylacidiphilaceae_4_ASV3830	Presence	Absence
822	Unclassified_Methylacidiphilaceae_3_ASV3829	Unclassified_Methylacidiphilaceae_3_ASV3829	Presence	Absence
823	Unclassified_Pedosphaeraceae_2_ASV4079	Unclassified_Pedosphaeraceae_2_ASV4079	Presence	Absence
824	Unclassified_Pedosphaeraceae_4_ASV4082	Unclassified_Pedosphaeraceae_4_ASV4082	Presence	Absence
825	Unclassified_Pedosphaeraceae_2_ASV4078	Unclassified_Pedosphaeraceae_2_ASV4078	Presence	Absence
826	Unclassified_Pedosphaeraceae_3_ASV4080	Unclassified_Pedosphaeraceae_3_ASV4080	Presence	Absence
827	Unclassified_Pedosphaeraceae_1_ASV4077	Unclassified_Pedosphaeraceae_1_ASV4077	Presence	Absence
828	Unclassified_Methylacidiphilaceae_1_ASV3827	Unclassified_Methylacidiphilaceae_1_ASV3827	Presence	Absence
829	Luteolibacter_ASV1285	Luteolibacter_ASV1285	Presence	Absence
830	Luteolibacter_ASV1286	Luteolibacter_ASV1286	Presence	Absence
831	Rubritalea_ASV1941	Rubritalea_ASV1941	Presence	Absence
832	Unclassified_Rubritaleaceae_1_ASV4487	Unclassified_Rubritaleaceae_1_ASV4487	Presence	Absence
833	Luteolibacter_ASV1290	Luteolibacter_ASV1290	Presence	Absence
834	Roseibacillus_ASV1903	Roseibacillus_ASV1903	Presence	Absence
835	Unclassified_DEV007_3_ASV3295	Unclassified_DEV007_3_ASV3295	Presence	Absence
836	Unclassified_DEV007_1_ASV3293	Unclassified_DEV007_1_ASV3293	Presence	Absence
837	Unclassified_DEV007_4_ASV3296	Unclassified_DEV007_4_ASV3296	Presence	Absence
838	Roseibacillus_ASV1902	Roseibacillus_ASV1902	Presence	Absence
839	Akkermansia_ASV106	Akkermansia_ASV106	Presence	Absence
840	Unclassified_Verrucomicrobiaceae_1_ASV4894	Unclassified_Verrucomicrobiaceae_1_ASV4894	Presence	Absence
841	Prosthecobacter_ASV1728	Prosthecobacter_ASV1728	Presence	Absence
842	Unclassified_DEV007_2_ASV3294	Unclassified_DEV007_2_ASV3294	Presence	Absence
843	Unclassified_DEV007_6_ASV3298	Unclassified_DEV007_6_ASV3298	Presence	Absence
844	Unclassified_Chthoniobacteraceae_1_ASV3071	Unclassified_Chthoniobacteraceae_1_ASV3071	Presence	Absence
845	Candidatus_Udaeobacter_ASV481	Candidatus_Udaeobacter_ASV481	Presence	Absence
846	Candidatus_Udaeobacter_ASV484	Candidatus_Udaeobacter_ASV484	Presence	Absence
847	Candidatus_Udaeobacter_ASV482	Candidatus_Udaeobacter_ASV482	Presence	Absence
848	Unclassified_Chthoniobacterales_5_ASV3076	Unclassified_Chthoniobacterales_5_ASV3076	Presence	Absence
849	Chthoniobacter_ASV554	Chthoniobacter_ASV554	Presence	Absence
850	Chthoniobacter_ASV552	Chthoniobacter_ASV552	Presence	Absence
851	Terrimicrobium_ASV2339	Terrimicrobium_ASV2339	Presence	Absence
852	Terrimicrobium_ASV2336	Terrimicrobium_ASV2336	Presence	Absence
853	Terrimicrobium_ASV2338	Terrimicrobium_ASV2338	Presence	Absence
854	LD29_ASV1203	LD29_ASV1203	Presence	Absence
855	Unclassified_Chthoniobacterales_3_ASV3074	Unclassified_Chthoniobacterales_3_ASV3074	Presence	Absence
856	Unclassified_Chthoniobacterales_2_ASV3073	Unclassified_Chthoniobacterales_2_ASV3073	Presence	Absence
857	Terrimicrobium_ASV2333	Terrimicrobium_ASV2333	Presence	Absence
858	Candidatus_Xiphinematobacter_ASV489	Candidatus_Xiphinematobacter_ASV489	Presence	Absence
859	Unclassified_Chthoniobacterales_4_ASV3075	Unclassified_Chthoniobacterales_4_ASV3075	Presence	Absence
860	Candidatus_Udaeobacter_ASV485	Candidatus_Udaeobacter_ASV485	Presence	Absence
861	Candidatus_Udaeobacter_ASV483	Candidatus_Udaeobacter_ASV483	Presence	Absence
862	Unclassified_TA06_ASV2317	Unclassified_TA06_ASV2317	Presence	Absence
863	Unclassified_Aminicenantales_4_ASV2583	Unclassified_Aminicenantales_4_ASV2583	Presence	Absence
864	Unclassified_Aminicenantales_1_ASV2580	Unclassified_Aminicenantales_1_ASV2580	Presence	Absence
865	Unclassified_vadinHA49_3_ASV4880	Unclassified_vadinHA49_3_ASV4880	Presence	Absence
866	Unclassified_vadinHA49_8_ASV4885	Unclassified_vadinHA49_8_ASV4885	Presence	Absence
867	Unclassified_vadinHA49_10_ASV4868	Unclassified_vadinHA49_10_ASV4868	Presence	Absence
868	Unclassified_vadinHA49_14_ASV4872	Unclassified_vadinHA49_14_ASV4872	Presence	Absence
869	Unclassified_vadinHA49_5_ASV4882	Unclassified_vadinHA49_5_ASV4882	Presence	Absence
870	Unclassified_Planctomycetota_11_ASV4206	Unclassified_Planctomycetota_11_ASV4206	Presence	Absence
871	Unclassified_vadinHA49_12_ASV4870	Unclassified_vadinHA49_12_ASV4870	Presence	Absence
872	Unclassified_Subgroup_18_1_ASV4801	Unclassified_Subgroup_18_1_ASV4801	Presence	Absence
873	Unclassified_Subgroup_18_2_ASV4802	Unclassified_Subgroup_18_2_ASV4802	Presence	Absence
874	Unclassified_Acidobacteriota_7_ASV2491	Unclassified_Acidobacteriota_7_ASV2491	Presence	Absence
875	Unclassified_Subgroup_18_3_ASV4803	Unclassified_Subgroup_18_3_ASV4803	Presence	Absence
876	Unclassified_Acidobacteriota_3_ASV2487	Unclassified_Acidobacteriota_3_ASV2487	Presence	Absence
877	Unclassified_Acidobacteriota_2_ASV2486	Unclassified_Acidobacteriota_2_ASV2486	Presence	Absence
878	Unclassified_Acidobacteriota_4_ASV2488	Unclassified_Acidobacteriota_4_ASV2488	Presence	Absence
879	Unclassified_Acidobacteriota_6_ASV2490	Unclassified_Acidobacteriota_6_ASV2490	Presence	Absence
880	Hydrogenispora_ASV1095	Hydrogenispora_ASV1095	Presence	Absence
881	Unclassified_Acidobacteriota_5_ASV2489	Unclassified_Acidobacteriota_5_ASV2489	Presence	Absence
882	Subgroup_10_ASV2266	Subgroup_10_ASV2266	Presence	Absence
883	Subgroup_10_ASV2264	Subgroup_10_ASV2264	Presence	Absence
884	Subgroup_10_ASV2261	Subgroup_10_ASV2261	Presence	Absence
885	Subgroup_10_ASV2262	Subgroup_10_ASV2262	Presence	Absence
886	Unclassified_Subgroup_7_1_ASV4815	Unclassified_Subgroup_7_1_ASV4815	Presence	Absence
887	Subgroup_10_ASV2268	Subgroup_10_ASV2268	Presence	Absence
888	Subgroup_10_ASV2263	Subgroup_10_ASV2263	Presence	Absence
889	Subgroup_10_ASV2265	Subgroup_10_ASV2265	Presence	Absence
890	Subgroup_10_ASV2267	Subgroup_10_ASV2267	Presence	Absence
891	Subgroup_10_ASV2260	Subgroup_10_ASV2260	Presence	Absence
892	Subgroup_23_ASV2271	Subgroup_23_ASV2271	Presence	Absence
893	Subgroup_23_ASV2270	Subgroup_23_ASV2270	Presence	Absence
894	Unclassified_Subgroup_22_2_ASV4805	Unclassified_Subgroup_22_2_ASV4805	Presence	Absence
895	Unclassified_Subgroup_22_4_ASV4807	Unclassified_Subgroup_22_4_ASV4807	Presence	Absence
896	Unclassified_SAR324_clade(Marine_group_B)_1_ASV4589	Unclassified_SAR324_clade(Marine_group_B)_1_ASV4589	Presence	Absence
897	Unclassified_Alphaproteobacteria_35_ASV2569	Unclassified_Alphaproteobacteria_35_ASV2569	Presence	Absence
898	Unclassified_VHS-B3-70_ASV5048	Unclassified_VHS-B3-70_ASV5048	Presence	Absence
899	Unclassified_Sumerlaeia_1_ASV4819	Unclassified_Sumerlaeia_1_ASV4819	Presence	Absence
900	Unclassified_Latescibacterota_4_ASV3739	Unclassified_Latescibacterota_4_ASV3739	Presence	Absence
901	Unclassified_Thermodesulfovibrionia_1_ASV4855	Unclassified_Thermodesulfovibrionia_1_ASV4855	Presence	Absence
902	Unclassified_Thermodesulfovibrionia_3_ASV4857	Unclassified_Thermodesulfovibrionia_3_ASV4857	Presence	Absence
903	Unclassified_Subgroup_26_3_ASV4814	Unclassified_Subgroup_26_3_ASV4814	Presence	Absence
904	Unclassified_Subgroup_26_1_ASV4812	Unclassified_Subgroup_26_1_ASV4812	Presence	Absence
905	Unclassified_Subgroup_26_2_ASV4813	Unclassified_Subgroup_26_2_ASV4813	Presence	Absence
906	Unclassified_bacteriap25_2_ASV2702	Unclassified_bacteriap25_2_ASV2702	Presence	Absence
907	Unclassified_Firmicutes_3_ASV3388	Unclassified_Firmicutes_3_ASV3388	Presence	Absence
908	RB41_ASV1805	RB41_ASV1805	Presence	Absence
909	Unclassified_Blastocatellaceae_2_ASV2913	Unclassified_Blastocatellaceae_2_ASV2913	Presence	Absence
910	Unclassified_Blastocatellaceae_6_ASV2917	Unclassified_Blastocatellaceae_6_ASV2917	Presence	Absence
911	Blastocatella_ASV322	Blastocatella_ASV322	Presence	Absence
912	Unclassified_JS1_1_ASV3664	Unclassified_JS1_1_ASV3664	Presence	Absence
913	Unclassified_JS1_2_ASV3665	Unclassified_JS1_2_ASV3665	Presence	Absence
914	Unclassified_JS1_3_ASV3666	Unclassified_JS1_3_ASV3666	Presence	Absence
915	Unclassified_Latescibacteraceae_1_ASV3723	Unclassified_Latescibacteraceae_1_ASV3723	Presence	Absence
916	Unclassified_Latescibacteraceae_5_ASV3728	Unclassified_Latescibacteraceae_5_ASV3728	Presence	Absence
917	Unclassified_Latescibacteraceae_2_ASV3725	Unclassified_Latescibacteraceae_2_ASV3725	Presence	Absence
918	Unclassified_KD4-96_ASV1136	Unclassified_KD4-96_ASV1136	Presence	Absence
919	Unclassified_S085_1_ASV4507	Unclassified_S085_1_ASV4507	Presence	Absence
920	Unclassified_OLB14_ASV1543	Unclassified_OLB14_ASV1543	Presence	Absence
921	Unclassified_TK10_1_ASV4861	Unclassified_TK10_1_ASV4861	Presence	Absence
922	Unclassified_TK10_2_ASV4862	Unclassified_TK10_2_ASV4862	Presence	Absence
923	Unclassified_SAR324_clade(Marine_group_B)_11_ASV4591	Unclassified_SAR324_clade(Marine_group_B)_11_ASV4591	Presence	Absence
924	Unclassified_SAR324_clade(Marine_group_B)_10_ASV4590	Unclassified_SAR324_clade(Marine_group_B)_10_ASV4590	Presence	Absence
925	Unclassified_SAR324_clade(Marine_group_B)_13_ASV4593	Unclassified_SAR324_clade(Marine_group_B)_13_ASV4593	Presence	Absence
926	Unclassified_SAR324_clade(Marine_group_B)_5_ASV4599	Unclassified_SAR324_clade(Marine_group_B)_5_ASV4599	Presence	Absence
927	Nitrospira_ASV1488	Nitrospira_ASV1488	Presence	Absence
928	Nitrospira_ASV1487	Nitrospira_ASV1487	Presence	Absence
929	Nitrospira_ASV1486	Nitrospira_ASV1486	Presence	Absence
930	Unclassified_Armatimonadota_1_ASV2657	Unclassified_Armatimonadota_1_ASV2657	Presence	Absence
931	Unclassified_JG30-KF-CM45_4_ASV3659	Unclassified_JG30-KF-CM45_4_ASV3659	Presence	Absence
932	Legionella_ASV1220	Legionella_ASV1220	Presence	Absence
933	Candidatus_Chlorothrix_ASV426	Candidatus_Chlorothrix_ASV426	Presence	Absence
934	Candidatus_Chlorothrix_ASV421	Candidatus_Chlorothrix_ASV421	Presence	Absence
935	Candidatus_Chlorothrix_ASV423	Candidatus_Chlorothrix_ASV423	Presence	Absence
936	Candidatus_Chlorothrix_ASV422	Candidatus_Chlorothrix_ASV422	Presence	Absence
937	Candidatus_Chlorothrix_ASV425	Candidatus_Chlorothrix_ASV425	Presence	Absence
938	Unclassified_Roseiflexaceae_1_ASV4483	Unclassified_Roseiflexaceae_1_ASV4483	Presence	Absence
939	Unclassified_SBR1031_23_ASV4641	Unclassified_SBR1031_23_ASV4641	Presence	Absence
940	Unclassified_SBR1031_72_ASV4695	Unclassified_SBR1031_72_ASV4695	Presence	Absence
941	Unclassified_SBR1031_33_ASV4652	Unclassified_SBR1031_33_ASV4652	Presence	Absence
942	Unclassified_SBR1031_57_ASV4678	Unclassified_SBR1031_57_ASV4678	Presence	Absence
943	Unclassified_SBR1031_28_ASV4646	Unclassified_SBR1031_28_ASV4646	Presence	Absence
944	Unclassified_SBR1031_44_ASV4664	Unclassified_SBR1031_44_ASV4664	Presence	Absence
945	Unclassified_SBR1031_45_ASV4665	Unclassified_SBR1031_45_ASV4665	Presence	Absence
946	Unclassified_SBR1031_26_ASV4644	Unclassified_SBR1031_26_ASV4644	Presence	Absence
947	Unclassified_SBR1031_1_ASV4625	Unclassified_SBR1031_1_ASV4625	Presence	Absence
948	Unclassified_SBR1031_85_ASV4709	Unclassified_SBR1031_85_ASV4709	Presence	Absence
949	Unclassified_SBR1031_15_ASV4632	Unclassified_SBR1031_15_ASV4632	Presence	Absence
950	Unclassified_SBR1031_84_ASV4708	Unclassified_SBR1031_84_ASV4708	Presence	Absence
951	Unclassified_SBR1031_34_ASV4653	Unclassified_SBR1031_34_ASV4653	Presence	Absence
952	Unclassified_SBR1031_52_ASV4673	Unclassified_SBR1031_52_ASV4673	Presence	Absence
953	Unclassified_SBR1031_8_ASV4703	Unclassified_SBR1031_8_ASV4703	Presence	Absence
954	Unclassified_SBR1031_86_ASV4710	Unclassified_SBR1031_86_ASV4710	Presence	Absence
955	Unclassified_A4b_22_ASV2444	Unclassified_A4b_22_ASV2444	Presence	Absence
956	Unclassified_A4b_23_ASV2445	Unclassified_A4b_23_ASV2445	Presence	Absence
957	Unclassified_A4b_9_ASV2460	Unclassified_A4b_9_ASV2460	Presence	Absence
958	Unclassified_A4b_25_ASV2447	Unclassified_A4b_25_ASV2447	Presence	Absence
959	Unclassified_A4b_13_ASV2434	Unclassified_A4b_13_ASV2434	Presence	Absence
960	Unclassified_A4b_4_ASV2455	Unclassified_A4b_4_ASV2455	Presence	Absence
961	Unclassified_A4b_14_ASV2435	Unclassified_A4b_14_ASV2435	Presence	Absence
962	Unclassified_A4b_29_ASV2451	Unclassified_A4b_29_ASV2451	Presence	Absence
963	Unclassified_A4b_8_ASV2459	Unclassified_A4b_8_ASV2459	Presence	Absence
964	Unclassified_A4b_27_ASV2449	Unclassified_A4b_27_ASV2449	Presence	Absence
965	Unclassified_A4b_10_ASV2431	Unclassified_A4b_10_ASV2431	Presence	Absence
966	Unclassified_A4b_19_ASV2440	Unclassified_A4b_19_ASV2440	Presence	Absence
967	Unclassified_A4b_6_ASV2457	Unclassified_A4b_6_ASV2457	Presence	Absence
968	Unclassified_A4b_17_ASV2438	Unclassified_A4b_17_ASV2438	Presence	Absence
969	Unclassified_A4b_26_ASV2448	Unclassified_A4b_26_ASV2448	Presence	Absence
970	Unclassified_A4b_1_ASV2430	Unclassified_A4b_1_ASV2430	Presence	Absence
971	Unclassified_A4b_30_ASV2453	Unclassified_A4b_30_ASV2453	Presence	Absence
972	Unclassified_A4b_21_ASV2443	Unclassified_A4b_21_ASV2443	Presence	Absence
973	Unclassified_A4b_28_ASV2450	Unclassified_A4b_28_ASV2450	Presence	Absence
974	Unclassified_A4b_7_ASV2458	Unclassified_A4b_7_ASV2458	Presence	Absence
975	Unclassified_A4b_20_ASV2442	Unclassified_A4b_20_ASV2442	Presence	Absence
976	Unclassified_A4b_11_ASV2432	Unclassified_A4b_11_ASV2432	Presence	Absence
977	Unclassified_SBR1031_68_ASV4690	Unclassified_SBR1031_68_ASV4690	Presence	Absence
978	Unclassified_SBR1031_50_ASV4671	Unclassified_SBR1031_50_ASV4671	Presence	Absence
979	Unclassified_SBR1031_42_ASV4662	Unclassified_SBR1031_42_ASV4662	Presence	Absence
980	Unclassified_SBR1031_2_ASV4637	Unclassified_SBR1031_2_ASV4637	Presence	Absence
981	Unclassified_SBR1031_79_ASV4702	Unclassified_SBR1031_79_ASV4702	Presence	Absence
982	Unclassified_SBR1031_60_ASV4682	Unclassified_SBR1031_60_ASV4682	Presence	Absence
983	Unclassified_SBR1031_6_ASV4681	Unclassified_SBR1031_6_ASV4681	Presence	Absence
984	Unclassified_SBR1031_46_ASV4666	Unclassified_SBR1031_46_ASV4666	Presence	Absence
985	Unclassified_SBR1031_29_ASV4647	Unclassified_SBR1031_29_ASV4647	Presence	Absence
986	Unclassified_SBR1031_66_ASV4688	Unclassified_SBR1031_66_ASV4688	Presence	Absence
987	Unclassified_SBR1031_4_ASV4659	Unclassified_SBR1031_4_ASV4659	Presence	Absence
988	Unclassified_SBR1031_17_ASV4634	Unclassified_SBR1031_17_ASV4634	Presence	Absence
989	Unclassified_Ardenticatenales_3_ASV2646	Unclassified_Ardenticatenales_3_ASV2646	Presence	Absence
990	Unclassified_Caldilineaceae_1_ASV2963	Unclassified_Caldilineaceae_1_ASV2963	Presence	Absence
991	Unclassified_Ardenticatenales_4_ASV2647	Unclassified_Ardenticatenales_4_ASV2647	Presence	Absence
992	Unclassified_Ardenticatenales_9_ASV2652	Unclassified_Ardenticatenales_9_ASV2652	Presence	Absence
993	Unclassified_Ardenticatenales_14_ASV2638	Unclassified_Ardenticatenales_14_ASV2638	Presence	Absence
994	Unclassified_Ardenticatenales_8_ASV2651	Unclassified_Ardenticatenales_8_ASV2651	Presence	Absence
995	Unclassified_Ardenticatenales_16_ASV2640	Unclassified_Ardenticatenales_16_ASV2640	Presence	Absence
996	Unclassified_Ardenticatenales_11_ASV2635	Unclassified_Ardenticatenales_11_ASV2635	Presence	Absence
997	Unclassified_Ardenticatenales_7_ASV2650	Unclassified_Ardenticatenales_7_ASV2650	Presence	Absence
998	Unclassified_Ardenticatenales_19_ASV2643	Unclassified_Ardenticatenales_19_ASV2643	Presence	Absence
999	Unclassified_Ardenticatenales_5_ASV2648	Unclassified_Ardenticatenales_5_ASV2648	Presence	Absence
1000	Unclassified_Ardenticatenales_20_ASV2645	Unclassified_Ardenticatenales_20_ASV2645	Presence	Absence
1001	Unclassified_Ardenticatenales_2_ASV2644	Unclassified_Ardenticatenales_2_ASV2644	Presence	Absence
1002	Unclassified_Anaerolineae_1_ASV2623	Unclassified_Anaerolineae_1_ASV2623	Presence	Absence
1003	Unclassified_Anaerolineae_3_ASV2625	Unclassified_Anaerolineae_3_ASV2625	Presence	Absence
1004	Unclassified_Anaerolineae_2_ASV2624	Unclassified_Anaerolineae_2_ASV2624	Presence	Absence
1005	Unclassified_SBR1031_80_ASV4704	Unclassified_SBR1031_80_ASV4704	Presence	Absence
1006	Unclassified_SBR1031_39_ASV4658	Unclassified_SBR1031_39_ASV4658	Presence	Absence
1007	Unclassified_SBR1031_78_ASV4701	Unclassified_SBR1031_78_ASV4701	Presence	Absence
1008	Unclassified_SBR1031_22_ASV4640	Unclassified_SBR1031_22_ASV4640	Presence	Absence
1009	Unclassified_SBR1031_38_ASV4657	Unclassified_SBR1031_38_ASV4657	Presence	Absence
1010	Unclassified_SBR1031_36_ASV4655	Unclassified_SBR1031_36_ASV4655	Presence	Absence
1011	Unclassified_SBR1031_32_ASV4651	Unclassified_SBR1031_32_ASV4651	Presence	Absence
1012	Unclassified_SBR1031_77_ASV4700	Unclassified_SBR1031_77_ASV4700	Presence	Absence
1013	Unclassified_SBR1031_61_ASV4683	Unclassified_SBR1031_61_ASV4683	Presence	Absence
1014	Unclassified_SBR1031_58_ASV4679	Unclassified_SBR1031_58_ASV4679	Presence	Absence
1015	Unclassified_SBR1031_51_ASV4672	Unclassified_SBR1031_51_ASV4672	Presence	Absence
1016	Unclassified_SBR1031_48_ASV4668	Unclassified_SBR1031_48_ASV4668	Presence	Absence
1017	Unclassified_SBR1031_75_ASV4698	Unclassified_SBR1031_75_ASV4698	Presence	Absence
1018	Unclassified_SBR1031_13_ASV4630	Unclassified_SBR1031_13_ASV4630	Presence	Absence
1019	Unclassified_SBR1031_14_ASV4631	Unclassified_SBR1031_14_ASV4631	Presence	Absence
1020	Unclassified_SBR1031_54_ASV4675	Unclassified_SBR1031_54_ASV4675	Presence	Absence
1021	Unclassified_SBR1031_62_ASV4684	Unclassified_SBR1031_62_ASV4684	Presence	Absence
1022	Unclassified_SBR1031_5_ASV4670	Unclassified_SBR1031_5_ASV4670	Presence	Absence
1023	Unclassified_SBR1031_64_ASV4686	Unclassified_SBR1031_64_ASV4686	Presence	Absence
1024	Unclassified_SBR1031_37_ASV4656	Unclassified_SBR1031_37_ASV4656	Presence	Absence
1025	Unclassified_SBR1031_25_ASV4643	Unclassified_SBR1031_25_ASV4643	Presence	Absence
1026	Unclassified_SBR1031_18_ASV4635	Unclassified_SBR1031_18_ASV4635	Presence	Absence
1027	Unclassified_SBR1031_55_ASV4676	Unclassified_SBR1031_55_ASV4676	Presence	Absence
1028	Unclassified_SBR1031_67_ASV4689	Unclassified_SBR1031_67_ASV4689	Presence	Absence
1029	Unclassified_SBR1031_63_ASV4685	Unclassified_SBR1031_63_ASV4685	Presence	Absence
1030	Unclassified_SBR1031_7_ASV4692	Unclassified_SBR1031_7_ASV4692	Presence	Absence
1031	Unclassified_SBR1031_31_ASV4650	Unclassified_SBR1031_31_ASV4650	Presence	Absence
1032	Unclassified_SBR1031_11_ASV4628	Unclassified_SBR1031_11_ASV4628	Presence	Absence
1033	Unclassified_SBR1031_20_ASV4638	Unclassified_SBR1031_20_ASV4638	Presence	Absence
1034	Unclassified_SBR1031_56_ASV4677	Unclassified_SBR1031_56_ASV4677	Presence	Absence
1035	Unclassified_SBR1031_41_ASV4661	Unclassified_SBR1031_41_ASV4661	Presence	Absence
1036	Unclassified_SBR1031_10_ASV4627	Unclassified_SBR1031_10_ASV4627	Presence	Absence
1037	Unclassified_SBR1031_43_ASV4663	Unclassified_SBR1031_43_ASV4663	Presence	Absence
1038	Unclassified_SBR1031_76_ASV4699	Unclassified_SBR1031_76_ASV4699	Presence	Absence
1039	Unclassified_SBR1031_21_ASV4639	Unclassified_SBR1031_21_ASV4639	Presence	Absence
1040	Unclassified_SBR1031_73_ASV4696	Unclassified_SBR1031_73_ASV4696	Presence	Absence
1041	Unclassified_Anaerolineaceae_11_ASV2587	Unclassified_Anaerolineaceae_11_ASV2587	Presence	Absence
1042	Unclassified_Ardenticatenales_18_ASV2642	Unclassified_Ardenticatenales_18_ASV2642	Presence	Absence
1043	Unclassified_Ardenticatenales_10_ASV2634	Unclassified_Ardenticatenales_10_ASV2634	Presence	Absence
1044	Unclassified_Ardenticatenales_6_ASV2649	Unclassified_Ardenticatenales_6_ASV2649	Presence	Absence
1045	Unclassified_Ardenticatenales_13_ASV2637	Unclassified_Ardenticatenales_13_ASV2637	Presence	Absence
1046	Unclassified_Ardenticatenales_1_ASV2633	Unclassified_Ardenticatenales_1_ASV2633	Presence	Absence
1047	Unclassified_Anaerolineaceae_26_ASV2603	Unclassified_Anaerolineaceae_26_ASV2603	Presence	Absence
1048	Unclassified_Anaerolineaceae_22_ASV2599	Unclassified_Anaerolineaceae_22_ASV2599	Presence	Absence
1049	Unclassified_Anaerolineaceae_15_ASV2591	Unclassified_Anaerolineaceae_15_ASV2591	Presence	Absence
1050	Unclassified_Anaerolineaceae_9_ASV2622	Unclassified_Anaerolineaceae_9_ASV2622	Presence	Absence
1051	Unclassified_Anaerolineaceae_32_ASV2610	Unclassified_Anaerolineaceae_32_ASV2610	Presence	Absence
1052	Unclassified_Anaerolineaceae_17_ASV2593	Unclassified_Anaerolineaceae_17_ASV2593	Presence	Absence
1053	Unclassified_Anaerolineaceae_12_ASV2588	Unclassified_Anaerolineaceae_12_ASV2588	Presence	Absence
1054	Unclassified_Anaerolineaceae_1_ASV2585	Unclassified_Anaerolineaceae_1_ASV2585	Presence	Absence
1055	Unclassified_Anaerolineaceae_14_ASV2590	Unclassified_Anaerolineaceae_14_ASV2590	Presence	Absence
1056	Unclassified_Anaerolineaceae_37_ASV2615	Unclassified_Anaerolineaceae_37_ASV2615	Presence	Absence
1057	Unclassified_Anaerolineaceae_31_ASV2609	Unclassified_Anaerolineaceae_31_ASV2609	Presence	Absence
1058	Unclassified_Anaerolineaceae_27_ASV2604	Unclassified_Anaerolineaceae_27_ASV2604	Presence	Absence
1059	Unclassified_Anaerolineaceae_29_ASV2606	Unclassified_Anaerolineaceae_29_ASV2606	Presence	Absence
1060	Unclassified_Anaerolineaceae_33_ASV2611	Unclassified_Anaerolineaceae_33_ASV2611	Presence	Absence
1061	Unclassified_Anaerolineaceae_5_ASV2618	Unclassified_Anaerolineaceae_5_ASV2618	Presence	Absence
1062	Unclassified_Anaerolineaceae_18_ASV2594	Unclassified_Anaerolineaceae_18_ASV2594	Presence	Absence
1063	Unclassified_Anaerolineaceae_19_ASV2595	Unclassified_Anaerolineaceae_19_ASV2595	Presence	Absence
1064	Unclassified_Anaerolineaceae_30_ASV2608	Unclassified_Anaerolineaceae_30_ASV2608	Presence	Absence
1065	Anaerolineaceae_UCG-001_ASV191	Anaerolineaceae_UCG-001_ASV191	Presence	Absence
1066	Unclassified_Anaerolineaceae_2_ASV2596	Unclassified_Anaerolineaceae_2_ASV2596	Presence	Absence
1067	Unclassified_Anaerolineaceae_20_ASV2597	Unclassified_Anaerolineaceae_20_ASV2597	Presence	Absence
1068	Unclassified_Anaerolineaceae_23_ASV2600	Unclassified_Anaerolineaceae_23_ASV2600	Presence	Absence
1069	Unclassified_Anaerolineaceae_38_ASV2616	Unclassified_Anaerolineaceae_38_ASV2616	Presence	Absence
1070	Unclassified_Anaerolineaceae_16_ASV2592	Unclassified_Anaerolineaceae_16_ASV2592	Presence	Absence
1071	Unclassified_SBR1031_69_ASV4691	Unclassified_SBR1031_69_ASV4691	Presence	Absence
1072	Pelolinea_ASV1618	Pelolinea_ASV1618	Presence	Absence
1073	ADurb.Bin120_ASV93	ADurb.Bin120_ASV93	Presence	Absence
1074	Unclassified_Anaerolineaceae_3_ASV2607	Unclassified_Anaerolineaceae_3_ASV2607	Presence	Absence
1075	Unclassified_Anaerolineaceae_8_ASV2621	Unclassified_Anaerolineaceae_8_ASV2621	Presence	Absence
1076	Unclassified_Anaerolineaceae_10_ASV2586	Unclassified_Anaerolineaceae_10_ASV2586	Presence	Absence
1077	Unclassified_Anaerolineaceae_24_ASV2601	Unclassified_Anaerolineaceae_24_ASV2601	Presence	Absence
1078	Unclassified_Anaerolineaceae_35_ASV2613	Unclassified_Anaerolineaceae_35_ASV2613	Presence	Absence
1079	Unclassified_Anaerolineaceae_4_ASV2617	Unclassified_Anaerolineaceae_4_ASV2617	Presence	Absence
1080	Unclassified_SBR1031_30_ASV4649	Unclassified_SBR1031_30_ASV4649	Presence	Absence
1081	Unclassified_SAR202_clade_6_ASV4588	Unclassified_SAR202_clade_6_ASV4588	Presence	Absence
1082	Unclassified_SAR202_clade_5_ASV4587	Unclassified_SAR202_clade_5_ASV4587	Presence	Absence
1083	Unclassified_SAR202_clade_2_ASV4584	Unclassified_SAR202_clade_2_ASV4584	Presence	Absence
1084	Unclassified_JG30-KF-CM66_1_ASV3661	Unclassified_JG30-KF-CM66_1_ASV3661	Presence	Absence
1085	Unclassified_SAR202_clade_3_ASV4585	Unclassified_SAR202_clade_3_ASV4585	Presence	Absence
1086	Unclassified_GIF9_ASV1013	Unclassified_GIF9_ASV1013	Presence	Absence
1087	Unclassified_AB-539-J10_1_ASV2462	Unclassified_AB-539-J10_1_ASV2462	Presence	Absence
1088	Unclassified_AB-539-J10_1_ASV2461	Unclassified_AB-539-J10_1_ASV2461	Presence	Absence
1089	Unclassified_Dehalococcoidia_4_ASV3229	Unclassified_Dehalococcoidia_4_ASV3229	Presence	Absence
1090	Unclassified_Dehalococcoidia_2_ASV3227	Unclassified_Dehalococcoidia_2_ASV3227	Presence	Absence
1091	Unclassified_Dehalococcoidia_3_ASV3228	Unclassified_Dehalococcoidia_3_ASV3228	Presence	Absence
1092	Unclassified_GIF3_1_ASV3583	Unclassified_GIF3_1_ASV3583	Presence	Absence
1093	Unclassified_SAR202_clade_4_ASV4586	Unclassified_SAR202_clade_4_ASV4586	Presence	Absence
1094	Unclassified_Subgroup_25_ASV2272	Unclassified_Subgroup_25_ASV2272	Presence	Absence
1095	Candidatus_Koribacter_ASV436	Candidatus_Koribacter_ASV436	Presence	Absence
1096	Unclassified_PAUC26f_ASV1608	Unclassified_PAUC26f_ASV1608	Presence	Absence
1097	Bryobacter_ASV379	Bryobacter_ASV379	Presence	Absence
1098	Bryobacter_ASV378	Bryobacter_ASV378	Presence	Absence
1099	Unclassified_Ilumatobacteraceae_2_ASV3639	Unclassified_Ilumatobacteraceae_2_ASV3639	Presence	Absence
1100	Unclassified_IMCC26256_2_ASV3641	Unclassified_IMCC26256_2_ASV3641	Presence	Absence
1101	CL500-29_marine_group_ASV560	CL500-29_marine_group_ASV560	Presence	Absence
1102	CL500-29_marine_group_ASV559	CL500-29_marine_group_ASV559	Presence	Absence
1103	Iamia_ASV1121	Iamia_ASV1121	Presence	Absence
1104	Unclassified_Ilumatobacteraceae_1_ASV3638	Unclassified_Ilumatobacteraceae_1_ASV3638	Presence	Absence
1105	Unclassified_Microtrichales_6_ASV3882	Unclassified_Microtrichales_6_ASV3882	Presence	Absence
1106	Unclassified_Actinomarinales_11_ASV2500	Unclassified_Actinomarinales_11_ASV2500	Presence	Absence
1107	Unclassified_Actinomarinales_5_ASV2508	Unclassified_Actinomarinales_5_ASV2508	Presence	Absence
1108	Unclassified_Actinomarinales_9_ASV2512	Unclassified_Actinomarinales_9_ASV2512	Presence	Absence
1109	Unclassified_Actinomarinales_12_ASV2501	Unclassified_Actinomarinales_12_ASV2501	Presence	Absence
1110	Unclassified_Actinomarinales_8_ASV2511	Unclassified_Actinomarinales_8_ASV2511	Presence	Absence
1111	Unclassified_Actinomarinales_10_ASV2499	Unclassified_Actinomarinales_10_ASV2499	Presence	Absence
1112	Unclassified_Actinomarinales_14_ASV2503	Unclassified_Actinomarinales_14_ASV2503	Presence	Absence
1113	Unclassified_Actinomarinales_2_ASV2505	Unclassified_Actinomarinales_2_ASV2505	Presence	Absence
1114	Unclassified_Actinomarinales_15_ASV2504	Unclassified_Actinomarinales_15_ASV2504	Presence	Absence
1115	Unclassified_Actinomarinales_4_ASV2507	Unclassified_Actinomarinales_4_ASV2507	Presence	Absence
1116	Unclassified_Nocardioidaceae_1_ASV3977	Unclassified_Nocardioidaceae_1_ASV3977	Presence	Absence
1117	Aeromicrobium_ASV101	Aeromicrobium_ASV101	Presence	Absence
1118	Aeromicrobium_ASV102	Aeromicrobium_ASV102	Presence	Absence
1119	Nocardioides_ASV1499	Nocardioides_ASV1499	Presence	Absence
1120	Nocardioides_ASV1502	Nocardioides_ASV1502	Presence	Absence
1121	Unclassified_Actinobacteriota_2_ASV2497	Unclassified_Actinobacteriota_2_ASV2497	Presence	Absence
1122	Nakamurella_ASV1461	Nakamurella_ASV1461	Presence	Absence
1123	Unclassified_Pseudonocardiaceae_9_ASV4266	Unclassified_Pseudonocardiaceae_9_ASV4266	Presence	Absence
1124	Unclassified_Pseudonocardiaceae_8_ASV4265	Unclassified_Pseudonocardiaceae_8_ASV4265	Presence	Absence
1125	Saccharopolyspora_ASV1960	Saccharopolyspora_ASV1960	Presence	Absence
1126	Actinomycetospora_ASV85	Actinomycetospora_ASV85	Presence	Absence
1127	Unclassified_Pseudonocardiaceae_3_ASV4260	Unclassified_Pseudonocardiaceae_3_ASV4260	Presence	Absence
1128	Pseudonocardia_ASV1779	Pseudonocardia_ASV1779	Presence	Absence
1129	Rhodococcus_ASV1830	Rhodococcus_ASV1830	Presence	Absence
1130	Rhodococcus_ASV1838	Rhodococcus_ASV1838	Presence	Absence
1131	Dietzia_ASV842	Dietzia_ASV842	Presence	Absence
1132	Gordonia_ASV1025	Gordonia_ASV1025	Presence	Absence
1133	Corynebacterium_ASV664	Corynebacterium_ASV664	Presence	Absence
1134	Corynebacterium_ASV676	Corynebacterium_ASV676	Presence	Absence
1135	Corynebacterium_ASV657	Corynebacterium_ASV657	Presence	Absence
1136	Corynebacterium_ASV660	Corynebacterium_ASV660	Presence	Absence
1137	Corynebacterium_ASV655	Corynebacterium_ASV655	Presence	Absence
1138	Corynebacterium_ASV673	Corynebacterium_ASV673	Presence	Absence
1139	Corynebacterium_ASV653	Corynebacterium_ASV653	Presence	Absence
1140	Corynebacterium_ASV670	Corynebacterium_ASV670	Presence	Absence
1141	Corynebacterium_ASV651	Corynebacterium_ASV651	Presence	Absence
1142	Corynebacterium_ASV654	Corynebacterium_ASV654	Presence	Absence
1143	Corynebacterium_ASV674	Corynebacterium_ASV674	Presence	Absence
1144	Corynebacterium_ASV678	Corynebacterium_ASV678	Presence	Absence
1145	Unclassified_Corynebacteriaceae_1_ASV3139	Unclassified_Corynebacteriaceae_1_ASV3139	Presence	Absence
1146	Mycobacterium_ASV1416	Mycobacterium_ASV1416	Presence	Absence
1147	Mycobacterium_ASV1431	Mycobacterium_ASV1431	Presence	Absence
1148	Mycobacterium_ASV1430	Mycobacterium_ASV1430	Presence	Absence
1149	Mycobacterium_ASV1432	Mycobacterium_ASV1432	Presence	Absence
1150	Mycobacterium_ASV1434	Mycobacterium_ASV1434	Presence	Absence
1151	Mycobacterium_ASV1426	Mycobacterium_ASV1426	Presence	Absence
1152	Unclassified_Frankiales_4_ASV3459	Unclassified_Frankiales_4_ASV3459	Presence	Absence
1153	Blastococcus_ASV335	Blastococcus_ASV335	Presence	Absence
1154	Unclassified_Micromonosporaceae_3_ASV3870	Unclassified_Micromonosporaceae_3_ASV3870	Presence	Absence
1155	Leucobacter_ASV1248	Leucobacter_ASV1248	Presence	Absence
1156	Unclassified_Microbacteriaceae_4_ASV3849	Unclassified_Microbacteriaceae_4_ASV3849	Presence	Absence
1157	Unclassified_Microbacteriaceae_5_ASV3850	Unclassified_Microbacteriaceae_5_ASV3850	Presence	Absence
1158	Unclassified_Microbacteriaceae_7_ASV3852	Unclassified_Microbacteriaceae_7_ASV3852	Presence	Absence
1159	Cellulomonas_ASV500	Cellulomonas_ASV500	Presence	Absence
1160	Curtobacterium_ASV691	Curtobacterium_ASV691	Presence	Absence
1161	Leucobacter_ASV1249	Leucobacter_ASV1249	Presence	Absence
1162	Unclassified_Microbacteriaceae_11_ASV3845	Unclassified_Microbacteriaceae_11_ASV3845	Presence	Absence
1163	Unclassified_Microbacteriaceae_9_ASV3854	Unclassified_Microbacteriaceae_9_ASV3854	Presence	Absence
1164	Unclassified_Micrococcales_3_ASV3863	Unclassified_Micrococcales_3_ASV3863	Presence	Absence
1165	Flaviflexus_ASV933	Flaviflexus_ASV933	Presence	Absence
1166	Flaviflexus_ASV932	Flaviflexus_ASV932	Presence	Absence
1167	Unclassified_Micrococcales_2_ASV3862	Unclassified_Micrococcales_2_ASV3862	Presence	Absence
1168	Unclassified_Micrococcales_1_ASV3861	Unclassified_Micrococcales_1_ASV3861	Presence	Absence
1169	Brachybacterium_ASV350	Brachybacterium_ASV350	Presence	Absence
1170	Ornithinimicrobium_ASV1553	Ornithinimicrobium_ASV1553	Presence	Absence
1171	Unclassified_Bifidobacteriaceae_1_ASV2904	Unclassified_Bifidobacteriaceae_1_ASV2904	Presence	Absence
1172	Kocuria_ASV1140	Kocuria_ASV1140	Presence	Absence
1173	Kocuria_ASV1143	Kocuria_ASV1143	Presence	Absence
1174	Kocuria_ASV1144	Kocuria_ASV1144	Presence	Absence
1175	Unclassified_Micrococcaceae_2_ASV3856	Unclassified_Micrococcaceae_2_ASV3856	Presence	Absence
1176	Unclassified_Micrococcaceae_3_ASV3857	Unclassified_Micrococcaceae_3_ASV3857	Presence	Absence
1177	Micrococcus_ASV1394	Micrococcus_ASV1394	Presence	Absence
1178	Unclassified_Micrococcaceae_6_ASV3860	Unclassified_Micrococcaceae_6_ASV3860	Presence	Absence
1179	Arthrobacter_ASV221	Arthrobacter_ASV221	Presence	Absence
1180	Brevibacterium_ASV355	Brevibacterium_ASV355	Presence	Absence
1181	Brevibacterium_ASV360	Brevibacterium_ASV360	Presence	Absence
1182	Kocuria_ASV1141	Kocuria_ASV1141	Presence	Absence
1183	Unclassified_Nitriliruptoraceae_1_ASV3957	Unclassified_Nitriliruptoraceae_1_ASV3957	Presence	Absence
1184	Unclassified_Nitriliruptoraceae_ASV1475	Unclassified_Nitriliruptoraceae_ASV1475	Presence	Absence
1185	Unclassified_WS1_ASV5106	Unclassified_WS1_ASV5106	Presence	Absence
1186	Atopobium_ASV228	Atopobium_ASV228	Presence	Absence
1187	Unclassidied_67-14_3_ASV2413	Unclassidied_67-14_3_ASV2413	Presence	Absence
1188	Conexibacter_ASV643	Conexibacter_ASV643	Presence	Absence
1189	Gaiella_ASV982	Gaiella_ASV982	Presence	Absence
1190	Rubrobacter_ASV1947	Rubrobacter_ASV1947	Presence	Absence
1191	Unclassified_Gemmatimonadaceae_11_ASV3573	Unclassified_Gemmatimonadaceae_11_ASV3573	Presence	Absence
1192	Unclassified_Gemmatimonadaceae_4_ASV3576	Unclassified_Gemmatimonadaceae_4_ASV3576	Presence	Absence
1193	Unclassified_Longimicrobiaceae_2_ASV3788	Unclassified_Longimicrobiaceae_2_ASV3788	Presence	Absence
1194	Unclassified_Longimicrobiaceae_1_ASV3786	Unclassified_Longimicrobiaceae_1_ASV3786	Presence	Absence
1195	Unclassified_BD2-11_terrestrial_group_3_ASV2861	Unclassified_BD2-11_terrestrial_group_3_ASV2861	Presence	Absence
1196	Unclassified_BD2-11_terrestrial_group_9_ASV2870	Unclassified_BD2-11_terrestrial_group_9_ASV2870	Presence	Absence
1197	Unclassified_BD2-11_terrestrial_group_2_ASV2850	Unclassified_BD2-11_terrestrial_group_2_ASV2850	Presence	Absence
1198	Unclassified_BD2-11_terrestrial_group_29_ASV2860	Unclassified_BD2-11_terrestrial_group_29_ASV2860	Presence	Absence
1199	Unclassified_BD2-11_terrestrial_group_12_ASV2842	Unclassified_BD2-11_terrestrial_group_12_ASV2842	Presence	Absence
1200	Unclassified_BD2-11_terrestrial_group_1_ASV2839	Unclassified_BD2-11_terrestrial_group_1_ASV2839	Presence	Absence
1201	Unclassified_BD2-11_terrestrial_group_32_ASV2864	Unclassified_BD2-11_terrestrial_group_32_ASV2864	Presence	Absence
1202	Unclassified_BD2-11_terrestrial_group_8_ASV2869	Unclassified_BD2-11_terrestrial_group_8_ASV2869	Presence	Absence
1203	Unclassified_BD2-11_terrestrial_group_27_ASV2858	Unclassified_BD2-11_terrestrial_group_27_ASV2858	Presence	Absence
1204	Unclassified_BD2-11_terrestrial_group_22_ASV2853	Unclassified_BD2-11_terrestrial_group_22_ASV2853	Presence	Absence
1205	Unclassified_BD2-11_terrestrial_group_20_ASV2851	Unclassified_BD2-11_terrestrial_group_20_ASV2851	Presence	Absence
1206	Unclassified_BD2-11_terrestrial_group_21_ASV2852	Unclassified_BD2-11_terrestrial_group_21_ASV2852	Presence	Absence
1207	Unclassified_BD2-11_terrestrial_group_24_ASV2855	Unclassified_BD2-11_terrestrial_group_24_ASV2855	Presence	Absence
1208	Unclassified_BD2-11_terrestrial_group_15_ASV2845	Unclassified_BD2-11_terrestrial_group_15_ASV2845	Presence	Absence
1209	Unclassified_BD2-11_terrestrial_group_18_ASV2848	Unclassified_BD2-11_terrestrial_group_18_ASV2848	Presence	Absence
1210	Unclassified_BD2-11_terrestrial_group_19_ASV2849	Unclassified_BD2-11_terrestrial_group_19_ASV2849	Presence	Absence
1211	Unclassified_BD2-11_terrestrial_group_11_ASV2841	Unclassified_BD2-11_terrestrial_group_11_ASV2841	Presence	Absence
1212	Unclassified_BD2-11_terrestrial_group_17_ASV2847	Unclassified_BD2-11_terrestrial_group_17_ASV2847	Presence	Absence
1213	Unclassified_BD2-11_terrestrial_group_6_ASV2867	Unclassified_BD2-11_terrestrial_group_6_ASV2867	Presence	Absence
1214	Unclassified_BD2-11_terrestrial_group_5_ASV2866	Unclassified_BD2-11_terrestrial_group_5_ASV2866	Presence	Absence
1215	Unclassified_BD2-11_terrestrial_group_10_ASV2840	Unclassified_BD2-11_terrestrial_group_10_ASV2840	Presence	Absence
1216	Unclassified_BD2-11_terrestrial_group_13_ASV2843	Unclassified_BD2-11_terrestrial_group_13_ASV2843	Presence	Absence
1217	Unclassified_BD2-11_terrestrial_group_30_ASV2862	Unclassified_BD2-11_terrestrial_group_30_ASV2862	Presence	Absence
1218	Unclassified_BD2-11_terrestrial_group_28_ASV2859	Unclassified_BD2-11_terrestrial_group_28_ASV2859	Presence	Absence
1219	Unclassified_PAUC43f_marine_benthic_group_7_ASV4068	Unclassified_PAUC43f_marine_benthic_group_7_ASV4068	Presence	Absence
1220	Unclassified_PAUC43f_marine_benthic_group_12_ASV4058	Unclassified_PAUC43f_marine_benthic_group_12_ASV4058	Presence	Absence
1221	Unclassified_PAUC43f_marine_benthic_group_10_ASV4056	Unclassified_PAUC43f_marine_benthic_group_10_ASV4056	Presence	Absence
1222	Unclassified_PAUC43f_marine_benthic_group_6_ASV4067	Unclassified_PAUC43f_marine_benthic_group_6_ASV4067	Presence	Absence
1223	Unclassified_PAUC43f_marine_benthic_group_9_ASV4070	Unclassified_PAUC43f_marine_benthic_group_9_ASV4070	Presence	Absence
1224	Unclassified_PAUC43f_marine_benthic_group_5_ASV4066	Unclassified_PAUC43f_marine_benthic_group_5_ASV4066	Presence	Absence
1225	Unclassified_PAUC43f_marine_benthic_group_16_ASV4062	Unclassified_PAUC43f_marine_benthic_group_16_ASV4062	Presence	Absence
1226	Unclassified_PAUC43f_marine_benthic_group_11_ASV4057	Unclassified_PAUC43f_marine_benthic_group_11_ASV4057	Presence	Absence
1227	Unclassified_PAUC43f_marine_benthic_group_2_ASV4063	Unclassified_PAUC43f_marine_benthic_group_2_ASV4063	Presence	Absence
1228	Unclassified_PAUC43f_marine_benthic_group_15_ASV4061	Unclassified_PAUC43f_marine_benthic_group_15_ASV4061	Presence	Absence
1229	Unclassified_PAUC43f_marine_benthic_group_13_ASV4059	Unclassified_PAUC43f_marine_benthic_group_13_ASV4059	Presence	Absence
1230	Unclassified_PAUC43f_marine_benthic_group_1_ASV4055	Unclassified_PAUC43f_marine_benthic_group_1_ASV4055	Presence	Absence
1231	Unclassified_PAUC43f_marine_benthic_group_8_ASV4069	Unclassified_PAUC43f_marine_benthic_group_8_ASV4069	Presence	Absence
1232	Unclassified_PAUC43f_marine_benthic_group_14_ASV4060	Unclassified_PAUC43f_marine_benthic_group_14_ASV4060	Presence	Absence
1233	Unclassified_Moduliflexaceae_3_ASV3896	Unclassified_Moduliflexaceae_3_ASV3896	Presence	Absence
1234	Unclassified_Moduliflexaceae_1_ASV3894	Unclassified_Moduliflexaceae_1_ASV3894	Presence	Absence
1235	Unclassified_Moduliflexaceae_4_ASV3897	Unclassified_Moduliflexaceae_4_ASV3897	Presence	Absence
1236	Unclassified_Moduliflexaceae_5_ASV3898	Unclassified_Moduliflexaceae_5_ASV3898	Presence	Absence
1237	Unclassified_Moduliflexaceae_2_ASV3895	Unclassified_Moduliflexaceae_2_ASV3895	Presence	Absence
1238	Unclassified_Moduliflexaceae_6_ASV3899	Unclassified_Moduliflexaceae_6_ASV3899	Presence	Absence
1239	Unclassified_Gemmatimonadaceae_3_ASV3575	Unclassified_Gemmatimonadaceae_3_ASV3575	Presence	Absence
1240	Unclassified_Latescibacterota_3_ASV3738	Unclassified_Latescibacterota_3_ASV3738	Presence	Absence
1241	Desulfatiglans_ASV751	Desulfatiglans_ASV751	Presence	Absence
1242	Unclassified_Calditrichaceae_9_ASV2983	Unclassified_Calditrichaceae_9_ASV2983	Presence	Absence
1243	Unclassified_Clostridia_1_ASV3079	Unclassified_Clostridia_1_ASV3079	Presence	Absence
1244	Unclassified_Calditrichaceae_4_ASV2973	Unclassified_Calditrichaceae_4_ASV2973	Presence	Absence
1245	Calorithrix_ASV399	Calorithrix_ASV399	Presence	Absence
1246	Calorithrix_ASV394	Calorithrix_ASV394	Presence	Absence
1247	Calorithrix_ASV397	Calorithrix_ASV397	Presence	Absence
1248	Calorithrix_ASV395	Calorithrix_ASV395	Presence	Absence
1249	Calorithrix_ASV398	Calorithrix_ASV398	Presence	Absence
1250	Unclassified_Calditrichaceae_7_ASV2979	Unclassified_Calditrichaceae_7_ASV2979	Presence	Absence
1251	Unclassified_Calditrichaceae_6_ASV2977	Unclassified_Calditrichaceae_6_ASV2977	Presence	Absence
1252	Unclassified_Calditrichaceae_2_ASV2969	Unclassified_Calditrichaceae_2_ASV2969	Presence	Absence
1253	Caldithrix_ASV387	Caldithrix_ASV387	Presence	Absence
1254	Caldithrix_ASV392	Caldithrix_ASV392	Presence	Absence
1255	Caldithrix_ASV393	Caldithrix_ASV393	Presence	Absence
1256	Caldithrix_ASV391	Caldithrix_ASV391	Presence	Absence
1257	Caldithrix_ASV386	Caldithrix_ASV386	Presence	Absence
1258	Unclassified_Calditrichaceae_5_ASV2975	Unclassified_Calditrichaceae_5_ASV2975	Presence	Absence
1259	Unclassified_Calditrichaceae_1_ASV2966	Unclassified_Calditrichaceae_1_ASV2966	Presence	Absence
1260	Unclassified_Calditrichaceae_1_ASV2965	Unclassified_Calditrichaceae_1_ASV2965	Presence	Absence
1261	Unclassified_Calditrichaceae_10_ASV2967	Unclassified_Calditrichaceae_10_ASV2967	Presence	Absence
1262	Unclassified_bacteriap25_3_ASV2703	Unclassified_bacteriap25_3_ASV2703	Presence	Absence
1263	Unclassified_Desulfobacterota_2_ASV3242	Unclassified_Desulfobacterota_2_ASV3242	Presence	Absence
1264	Unclassified_Sva0485_8_ASV4832	Unclassified_Sva0485_8_ASV4832	Presence	Absence
1265	Unclassified_Desulfovibrionaceae_2_ASV3283	Unclassified_Desulfovibrionaceae_2_ASV3283	Presence	Absence
1266	Unclassified_Rs-K70_termite_group_1_ASV1924	Unclassified_Rs-K70_termite_group_1_ASV1924	Presence	Absence
1267	MSBL7_ASV1413	MSBL7_ASV1413	Presence	Absence
1268	Unclassified_Desulfocapsaceae_5_ASV3254	Unclassified_Desulfocapsaceae_5_ASV3254	Presence	Absence
1269	Desulfocapsa_ASV774	Desulfocapsa_ASV774	Presence	Absence
1270	Desulfopila_ASV792	Desulfopila_ASV792	Presence	Absence
1271	Unclassified_Desulfocapsaceae_6_ASV3255	Unclassified_Desulfocapsaceae_6_ASV3255	Presence	Absence
1272	Unclassified_Desulfocapsaceae_7_ASV3256	Unclassified_Desulfocapsaceae_7_ASV3256	Presence	Absence
1273	Unclassified_Desulfocapsaceae_4_ASV3253	Unclassified_Desulfocapsaceae_4_ASV3253	Presence	Absence
1274	Unclassified_Desulfocapsaceae_3_ASV3252	Unclassified_Desulfocapsaceae_3_ASV3252	Presence	Absence
1275	Desulfofustis_ASV784	Desulfofustis_ASV784	Presence	Absence
1276	Unclassified_Desulfocapsaceae_2_ASV3251	Unclassified_Desulfocapsaceae_2_ASV3251	Presence	Absence
1277	Desulfopila_ASV791	Desulfopila_ASV791	Presence	Absence
1278	Desulfatiglans_ASV750	Desulfatiglans_ASV750	Presence	Absence
1279	Desulfatiglans_ASV755	Desulfatiglans_ASV755	Presence	Absence
1280	Desulfatiglans_ASV762	Desulfatiglans_ASV762	Presence	Absence
1281	Desulfatiglans_ASV740	Desulfatiglans_ASV740	Presence	Absence
1282	Desulfatiglans_ASV748	Desulfatiglans_ASV748	Presence	Absence
1283	Desulfatiglans_ASV736	Desulfatiglans_ASV736	Presence	Absence
1284	Desulfatiglans_ASV764	Desulfatiglans_ASV764	Presence	Absence
1285	Desulfatiglans_ASV761	Desulfatiglans_ASV761	Presence	Absence
1286	Desulfatiglans_ASV757	Desulfatiglans_ASV757	Presence	Absence
1287	Desulfatiglans_ASV759	Desulfatiglans_ASV759	Presence	Absence
1288	Desulfatiglans_ASV753	Desulfatiglans_ASV753	Presence	Absence
1289	Desulfatiglans_ASV756	Desulfatiglans_ASV756	Presence	Absence
1290	Desulfatiglans_ASV738	Desulfatiglans_ASV738	Presence	Absence
1291	Desulfatiglans_ASV741	Desulfatiglans_ASV741	Presence	Absence
1292	Desulfatiglans_ASV765	Desulfatiglans_ASV765	Presence	Absence
1293	Candidatus_Paracaedibacter_ASV462	Candidatus_Paracaedibacter_ASV462	Presence	Absence
1294	Desulfatiglans_ASV737	Desulfatiglans_ASV737	Presence	Absence
1295	Desulfatiglans_ASV763	Desulfatiglans_ASV763	Presence	Absence
1296	Desulfatiglans_ASV760	Desulfatiglans_ASV760	Presence	Absence
1297	Unclassified_PS-B29_2_ASV4246	Unclassified_PS-B29_2_ASV4246	Presence	Absence
1298	Unclassified_Syntrophobacterales_1_ASV4842	Unclassified_Syntrophobacterales_1_ASV4842	Presence	Absence
1299	Unclassified_0319-6G20_6_ASV2424	Unclassified_0319-6G20_6_ASV2424	Presence	Absence
1300	Unclassified_Blfdi19_ASV343	Unclassified_Blfdi19_ASV343	Presence	Absence
1301	P3OB-42_ASV1564	P3OB-42_ASV1564	Presence	Absence
1302	P3OB-42_ASV1571	P3OB-42_ASV1571	Presence	Absence
1303	Unclassified_Sva0485_5_ASV4829	Unclassified_Sva0485_5_ASV4829	Presence	Absence
1304	P3OB-42_ASV1567	P3OB-42_ASV1567	Presence	Absence
1305	Unclassified_Syntrophobacteraceae_1_ASV4838	Unclassified_Syntrophobacteraceae_1_ASV4838	Presence	Absence
1306	Unclassified_Syntrophobacteraceae_3_ASV4840	Unclassified_Syntrophobacteraceae_3_ASV4840	Presence	Absence
1307	Unclassified_Syntrophobacteraceae_4_ASV4841	Unclassified_Syntrophobacteraceae_4_ASV4841	Presence	Absence
1308	Syntrophobacter_ASV2314	Syntrophobacter_ASV2314	Presence	Absence
1309	Unclassified_Desulfobacterota_5_ASV3245	Unclassified_Desulfobacterota_5_ASV3245	Presence	Absence
1310	Unclassified_MBNT15_3_ASV3824	Unclassified_MBNT15_3_ASV3824	Presence	Absence
1311	Unclassified_MBNT15_2_ASV3823	Unclassified_MBNT15_2_ASV3823	Presence	Absence
1312	Unclassified_Desulfobacterota_1_ASV3237	Unclassified_Desulfobacterota_1_ASV3237	Presence	Absence
1313	Cystobacter_ASV714	Cystobacter_ASV714	Presence	Absence
1314	Unclassified_Myxococcaceae_3_ASV3914	Unclassified_Myxococcaceae_3_ASV3914	Presence	Absence
1315	P3OB-42_ASV1563	P3OB-42_ASV1563	Presence	Absence
1316	Unclassified_Sandaracinaceae_9_ASV4525	Unclassified_Sandaracinaceae_9_ASV4525	Presence	Absence
1317	Unclassified_Sandaracinaceae_8_ASV4524	Unclassified_Sandaracinaceae_8_ASV4524	Presence	Absence
1318	Sandaracinus_ASV2035	Sandaracinus_ASV2035	Presence	Absence
1319	Unclassified_Sandaracinaceae_11_ASV4514	Unclassified_Sandaracinaceae_11_ASV4514	Presence	Absence
1320	Sandaracinus_ASV2034	Sandaracinus_ASV2034	Presence	Absence
1321	Sandaracinus_ASV2036	Sandaracinus_ASV2036	Presence	Absence
1322	Unclassified_Sandaracinaceae_13_ASV4516	Unclassified_Sandaracinaceae_13_ASV4516	Presence	Absence
1323	Unclassified_Sandaracinaceae_6_ASV4522	Unclassified_Sandaracinaceae_6_ASV4522	Presence	Absence
1324	Unclassified_Sandaracinaceae_1_ASV4512	Unclassified_Sandaracinaceae_1_ASV4512	Presence	Absence
1325	Unclassified_Myxococcota_1_ASV3918	Unclassified_Myxococcota_1_ASV3918	Presence	Absence
1326	Unclassified_NB1-j_21_ASV3936	Unclassified_NB1-j_21_ASV3936	Presence	Absence
1327	Unclassified_NB1-j_18_ASV3932	Unclassified_NB1-j_18_ASV3932	Presence	Absence
1328	Unclassified_NB1-j_10_ASV3924	Unclassified_NB1-j_10_ASV3924	Presence	Absence
1329	Unclassified_NB1-j_6_ASV3941	Unclassified_NB1-j_6_ASV3941	Presence	Absence
1330	Unclassified_NB1-j_16_ASV3930	Unclassified_NB1-j_16_ASV3930	Presence	Absence
1331	Unclassified_NB1-j_8_ASV3943	Unclassified_NB1-j_8_ASV3943	Presence	Absence
1332	Unclassified_NB1-j_20_ASV3935	Unclassified_NB1-j_20_ASV3935	Presence	Absence
1333	Unclassified_NB1-j_14_ASV3928	Unclassified_NB1-j_14_ASV3928	Presence	Absence
1334	Unclassified_NB1-j_17_ASV3931	Unclassified_NB1-j_17_ASV3931	Presence	Absence
1335	Unclassified_NB1-j_3_ASV3938	Unclassified_NB1-j_3_ASV3938	Presence	Absence
1336	Unclassified_NB1-j_1_ASV3923	Unclassified_NB1-j_1_ASV3923	Presence	Absence
1337	Unclassified_NB1-j_7_ASV3942	Unclassified_NB1-j_7_ASV3942	Presence	Absence
1338	Unclassified_NB1-j_2_ASV3934	Unclassified_NB1-j_2_ASV3934	Presence	Absence
1339	Unclassified_NB1-j_22_ASV3937	Unclassified_NB1-j_22_ASV3937	Presence	Absence
1340	Unclassified_Polyangiaceae_1_ASV4228	Unclassified_Polyangiaceae_1_ASV4228	Presence	Absence
1341	Unclassified_BIrii41_4_ASV2908	Unclassified_BIrii41_4_ASV2908	Presence	Absence
1342	Unclassified_BIrii41_1_ASV2905	Unclassified_BIrii41_1_ASV2905	Presence	Absence
1343	Unclassified_BIrii41_2_ASV2906	Unclassified_BIrii41_2_ASV2906	Presence	Absence
1344	Pajaroellobacter_ASV1580	Pajaroellobacter_ASV1580	Presence	Absence
1345	Phaselicystis_ASV1651	Phaselicystis_ASV1651	Presence	Absence
1346	Unclassified_BIrii41_5_ASV2909	Unclassified_BIrii41_5_ASV2909	Presence	Absence
1347	Unclassified_Polyangiales_1_ASV4230	Unclassified_Polyangiales_1_ASV4230	Presence	Absence
1348	Unclassified_NB1-j_5_ASV3940	Unclassified_NB1-j_5_ASV3940	Presence	Absence
1349	Unclassified_0319-6G20_2_ASV2420	Unclassified_0319-6G20_2_ASV2420	Presence	Absence
1350	Unclassified_0319-6G20_7_ASV2425	Unclassified_0319-6G20_7_ASV2425	Presence	Absence
1351	Unclassified_MidBa8_1_ASV3883	Unclassified_MidBa8_1_ASV3883	Presence	Absence
1352	Unclassified_MidBa8_2_ASV3884	Unclassified_MidBa8_2_ASV3884	Presence	Absence
1353	Desulfomonile_ASV787	Desulfomonile_ASV787	Presence	Absence
1354	Reyranella_ASV1812	Reyranella_ASV1812	Presence	Absence
1355	SWB02_ASV2308	SWB02_ASV2308	Presence	Absence
1356	SWB02_ASV2306	SWB02_ASV2306	Presence	Absence
1357	SWB02_ASV2304	SWB02_ASV2304	Presence	Absence
1358	SWB02_ASV2307	SWB02_ASV2307	Presence	Absence
1359	Unclassified_Hyphomonadaceae_3_ASV3631	Unclassified_Hyphomonadaceae_3_ASV3631	Presence	Absence
1360	Unclassified_Hyphomonadaceae_6_ASV3634	Unclassified_Hyphomonadaceae_6_ASV3634	Presence	Absence
1361	Unclassified_Hyphomonadaceae_5_ASV3633	Unclassified_Hyphomonadaceae_5_ASV3633	Presence	Absence
1362	Unclassified_Blastocatellia_11-24_ASV324	Unclassified_Blastocatellia_11-24_ASV324	Presence	Absence
1363	Unclassified_Alphaproteobacteria_14_ASV2546	Unclassified_Alphaproteobacteria_14_ASV2546	Presence	Absence
1364	Defluviicoccus_ASV726	Defluviicoccus_ASV726	Presence	Absence
1365	Rickettsia_ASV1875	Rickettsia_ASV1875	Presence	Absence
1366	Unclassified_Rhodobacteraceae_89_ASV4435	Unclassified_Rhodobacteraceae_89_ASV4435	Presence	Absence
1367	Unclassified_Defluviicoccales_3_ASV3222	Unclassified_Defluviicoccales_3_ASV3222	Presence	Absence
1368	Hirschia_ASV1092	Hirschia_ASV1092	Presence	Absence
1369	Unclassified_Rhodobacteraceae_16_ASV4355	Unclassified_Rhodobacteraceae_16_ASV4355	Presence	Absence
1370	Unclassified_AT-s3-44_2_ASV2660	Unclassified_AT-s3-44_2_ASV2660	Presence	Absence
1371	Unclassified_Sphingomonadaceae_2_ASV4753	Unclassified_Sphingomonadaceae_2_ASV4753	Presence	Absence
1372	Unclassified_Sphingomonadaceae_3_ASV4754	Unclassified_Sphingomonadaceae_3_ASV4754	Presence	Absence
1373	Unclassified_AT-s3-44_1_ASV2659	Unclassified_AT-s3-44_1_ASV2659	Presence	Absence
1374	Unclassified_Alphaproteobacteria_4_ASV2572	Unclassified_Alphaproteobacteria_4_ASV2572	Presence	Absence
1375	Unclassified_Alphaproteobacteria_15_ASV2547	Unclassified_Alphaproteobacteria_15_ASV2547	Presence	Absence
1376	Unclassified_Defluviicoccales_6_ASV3225	Unclassified_Defluviicoccales_6_ASV3225	Presence	Absence
1377	Unclassified_Defluviicoccales_2_ASV3221	Unclassified_Defluviicoccales_2_ASV3221	Presence	Absence
1378	Unclassified_Rhodobacteraceae_102_ASV4349	Unclassified_Rhodobacteraceae_102_ASV4349	Presence	Absence
1379	Unclassified_Rhodobacteraceae_99_ASV4446	Unclassified_Rhodobacteraceae_99_ASV4446	Presence	Absence
1380	Unclassified_Rhodobacteraceae_101_ASV4348	Unclassified_Rhodobacteraceae_101_ASV4348	Presence	Absence
1381	Unclassified_Rhodobacteraceae_96_ASV4443	Unclassified_Rhodobacteraceae_96_ASV4443	Presence	Absence
1382	Limibaculum_ASV1265	Limibaculum_ASV1265	Presence	Absence
1383	Rubribacterium_ASV1936	Rubribacterium_ASV1936	Presence	Absence
1384	Rubribacterium_ASV1938	Rubribacterium_ASV1938	Presence	Absence
1385	Candidatus_Alysiosphaera_ASV405	Candidatus_Alysiosphaera_ASV405	Presence	Absence
1386	Unclassified_Alphaproteobacteria_36_ASV2570	Unclassified_Alphaproteobacteria_36_ASV2570	Presence	Absence
1387	Unclassified_Alphaproteobacteria_29_ASV2562	Unclassified_Alphaproteobacteria_29_ASV2562	Presence	Absence
1388	Unclassified_Alphaproteobacteria_33_ASV2567	Unclassified_Alphaproteobacteria_33_ASV2567	Presence	Absence
1389	Unclassified_Alphaproteobacteria_25_ASV2558	Unclassified_Alphaproteobacteria_25_ASV2558	Presence	Absence
1390	Candidatus_Alysiosphaera_ASV407	Candidatus_Alysiosphaera_ASV407	Presence	Absence
1391	Candidatus_Alysiosphaera_ASV404	Candidatus_Alysiosphaera_ASV404	Presence	Absence
1392	Unclassified_Geminicoccaceae_2_ASV3550	Unclassified_Geminicoccaceae_2_ASV3550	Presence	Absence
1393	Unclassified_Geminicoccaceae_5_ASV3553	Unclassified_Geminicoccaceae_5_ASV3553	Presence	Absence
1394	Unclassified_Geminicoccaceae_1_ASV3549	Unclassified_Geminicoccaceae_1_ASV3549	Presence	Absence
1395	Unclassified_Geminicoccaceae_6_ASV3554	Unclassified_Geminicoccaceae_6_ASV3554	Presence	Absence
1396	Unclassified_Geminicoccaceae_3_ASV3551	Unclassified_Geminicoccaceae_3_ASV3551	Presence	Absence
1397	Sneathiella_ASV2101	Sneathiella_ASV2101	Presence	Absence
1398	Unclassified_Alphaproteobacteria_19_ASV2551	Unclassified_Alphaproteobacteria_19_ASV2551	Presence	Absence
1399	Sneathiella_ASV2102	Sneathiella_ASV2102	Presence	Absence
1400	Unclassified_Alphaproteobacteria_18_ASV2550	Unclassified_Alphaproteobacteria_18_ASV2550	Presence	Absence
1401	Unclassified_SM2D12_3_ASV4737	Unclassified_SM2D12_3_ASV4737	Presence	Absence
1402	Unclassified_Rhodospirillales_4_ASV4458	Unclassified_Rhodospirillales_4_ASV4458	Presence	Absence
1403	Unclassified_Bacteriovoracaceae_1_ASV2706	Unclassified_Bacteriovoracaceae_1_ASV2706	Presence	Absence
1404	Unclassified_Bacteriovoracaceae_2_ASV2707	Unclassified_Bacteriovoracaceae_2_ASV2707	Presence	Absence
1405	Peredibacter_ASV1630	Peredibacter_ASV1630	Presence	Absence
1406	Unclassified_Bacteriovoracaceae_3_ASV2708	Unclassified_Bacteriovoracaceae_3_ASV2708	Presence	Absence
1407	Unclassified_0319-6G20_1_ASV2419	Unclassified_0319-6G20_1_ASV2419	Presence	Absence
1408	Unclassified_Defluviicoccales_5_ASV3224	Unclassified_Defluviicoccales_5_ASV3224	Presence	Absence
1409	Unclassified_Alphaproteobacteria_12_ASV2544	Unclassified_Alphaproteobacteria_12_ASV2544	Presence	Absence
1410	Unclassified_Thalassobaculales_3_ASV4851	Unclassified_Thalassobaculales_3_ASV4851	Presence	Absence
1411	Unclassified_Zavarziniales_1_ASV4972	Unclassified_Zavarziniales_1_ASV4972	Presence	Absence
1412	Unclassified_Alphaproteobacteria_1_ASV2541	Unclassified_Alphaproteobacteria_1_ASV2541	Presence	Absence
1413	Unclassified_Alphaproteobacteria_20_ASV2553	Unclassified_Alphaproteobacteria_20_ASV2553	Presence	Absence
1414	Bartonella_ASV286	Bartonella_ASV286	Presence	Absence
1415	Bartonella_ASV285	Bartonella_ASV285	Presence	Absence
1416	Bartonella_ASV277	Bartonella_ASV277	Presence	Absence
1417	Bartonella_ASV281	Bartonella_ASV281	Presence	Absence
1418	Unclassified_Rhizobiaceae_1_ASV4293	Unclassified_Rhizobiaceae_1_ASV4293	Presence	Absence
1419	Unclassified_Hyphomonadaceae_7_ASV3635	Unclassified_Hyphomonadaceae_7_ASV3635	Presence	Absence
1420	Unclassified_Rhodobacteraceae_100_ASV4347	Unclassified_Rhodobacteraceae_100_ASV4347	Presence	Absence
1421	Unclassified_D05-2_2_ASV3216	Unclassified_D05-2_2_ASV3216	Presence	Absence
1422	Unclassified_D05-2_3_ASV3217	Unclassified_D05-2_3_ASV3217	Presence	Absence
1423	Allorhizobium-Neorhizobium-Pararhizobium-Rhizobium_ASV153	Allorhizobium-Neorhizobium-Pararhizobium-Rhizobium_ASV153	Presence	Absence
1424	Unclassified_Rhizobiaceae_6_ASV4318	Unclassified_Rhizobiaceae_6_ASV4318	Presence	Absence
1425	Ochrobactrum_ASV1538	Ochrobactrum_ASV1538	Presence	Absence
1426	Ochrobactrum_ASV1540	Ochrobactrum_ASV1540	Presence	Absence
1427	Ochrobactrum_ASV1536	Ochrobactrum_ASV1536	Presence	Absence
1428	Allorhizobium-Neorhizobium-Pararhizobium-Rhizobium_ASV151	Allorhizobium-Neorhizobium-Pararhizobium-Rhizobium_ASV151	Presence	Absence
1429	Pseudochrobactrum_ASV1742	Pseudochrobactrum_ASV1742	Presence	Absence
1430	Aureimonas_ASV236	Aureimonas_ASV236	Presence	Absence
1431	Aureimonas_ASV240	Aureimonas_ASV240	Presence	Absence
1432	Aureimonas_ASV238	Aureimonas_ASV238	Presence	Absence
1433	Aureimonas_ASV235	Aureimonas_ASV235	Presence	Absence
1434	Allorhizobium-Neorhizobium-Pararhizobium-Rhizobium_ASV142	Allorhizobium-Neorhizobium-Pararhizobium-Rhizobium_ASV142	Presence	Absence
1435	Allorhizobium-Neorhizobium-Pararhizobium-Rhizobium_ASV149	Allorhizobium-Neorhizobium-Pararhizobium-Rhizobium_ASV149	Presence	Absence
1436	Allorhizobium-Neorhizobium-Pararhizobium-Rhizobium_ASV141	Allorhizobium-Neorhizobium-Pararhizobium-Rhizobium_ASV141	Presence	Absence
1437	Unclassified_Rhizobiaceae_15_ASV4299	Unclassified_Rhizobiaceae_15_ASV4299	Presence	Absence
1438	Aureimonas_ASV239	Aureimonas_ASV239	Presence	Absence
1439	Unclassified_Rhizobiaceae_3_ASV4315	Unclassified_Rhizobiaceae_3_ASV4315	Presence	Absence
1440	Allorhizobium-Neorhizobium-Pararhizobium-Rhizobium_ASV154	Allorhizobium-Neorhizobium-Pararhizobium-Rhizobium_ASV154	Presence	Absence
1441	Aureimonas_ASV242	Aureimonas_ASV242	Presence	Absence
1442	Allorhizobium-Neorhizobium-Pararhizobium-Rhizobium_ASV156	Allorhizobium-Neorhizobium-Pararhizobium-Rhizobium_ASV156	Presence	Absence
1443	Allorhizobium-Neorhizobium-Pararhizobium-Rhizobium_ASV159	Allorhizobium-Neorhizobium-Pararhizobium-Rhizobium_ASV159	Presence	Absence
1444	Shinella_ASV2079	Shinella_ASV2079	Presence	Absence
1445	Allorhizobium-Neorhizobium-Pararhizobium-Rhizobium_ASV143	Allorhizobium-Neorhizobium-Pararhizobium-Rhizobium_ASV143	Presence	Absence
1446	Bartonella_ASV287	Bartonella_ASV287	Presence	Absence
1447	Bartonella_ASV288	Bartonella_ASV288	Presence	Absence
1448	Unclassified_Rhizobiaceae_27_ASV4312	Unclassified_Rhizobiaceae_27_ASV4312	Presence	Absence
1449	Unclassified_Rhizobiales_10_ASV4323	Unclassified_Rhizobiales_10_ASV4323	Presence	Absence
1450	Unclassified_Rhodobacteraceae_57_ASV4400	Unclassified_Rhodobacteraceae_57_ASV4400	Presence	Absence
1451	Unclassified_Hyphomonadaceae_2_ASV3630	Unclassified_Hyphomonadaceae_2_ASV3630	Presence	Absence
1452	Hyphomonas_ASV1119	Hyphomonas_ASV1119	Presence	Absence
1453	Hyphomonas_ASV1120	Hyphomonas_ASV1120	Presence	Absence
1454	Unclassified_Rhodobacteraceae_75_ASV4420	Unclassified_Rhodobacteraceae_75_ASV4420	Presence	Absence
1455	Unclassified_Rhodobacteraceae_25_ASV4365	Unclassified_Rhodobacteraceae_25_ASV4365	Presence	Absence
1456	Unclassified_Rhodobacteraceae_46_ASV4388	Unclassified_Rhodobacteraceae_46_ASV4388	Presence	Absence
1457	Unclassified_Rhodobacteraceae_44_ASV4386	Unclassified_Rhodobacteraceae_44_ASV4386	Presence	Absence
1458	Oceanicaulis_ASV1528	Oceanicaulis_ASV1528	Presence	Absence
1459	Unclassified_Methyloligellaceae_3_ASV3835	Unclassified_Methyloligellaceae_3_ASV3835	Presence	Absence
1460	Methyloceanibacter_ASV1375	Methyloceanibacter_ASV1375	Presence	Absence
1461	Methyloceanibacter_ASV1374	Methyloceanibacter_ASV1374	Presence	Absence
1462	Asticcacaulis_ASV227	Asticcacaulis_ASV227	Presence	Absence
1463	Brevundimonas_ASV368	Brevundimonas_ASV368	Presence	Absence
1464	Brevundimonas_ASV370	Brevundimonas_ASV370	Presence	Absence
1465	Brevundimonas_ASV367	Brevundimonas_ASV367	Presence	Absence
1466	Brevundimonas_ASV369	Brevundimonas_ASV369	Presence	Absence
1467	Bosea_ASV345	Bosea_ASV345	Presence	Absence
1468	Bosea_ASV344	Bosea_ASV344	Presence	Absence
1469	Methylobacterium-Methylorubrum_ASV1361	Methylobacterium-Methylorubrum_ASV1361	Presence	Absence
1470	Methylobacterium-Methylorubrum_ASV1357	Methylobacterium-Methylorubrum_ASV1357	Presence	Absence
1471	Methylobacterium-Methylorubrum_ASV1370	Methylobacterium-Methylorubrum_ASV1370	Presence	Absence
1472	Methylobacterium-Methylorubrum_ASV1365	Methylobacterium-Methylorubrum_ASV1365	Presence	Absence
1473	Methylobacterium-Methylorubrum_ASV1363	Methylobacterium-Methylorubrum_ASV1363	Presence	Absence
1474	Methylobacterium-Methylorubrum_ASV1362	Methylobacterium-Methylorubrum_ASV1362	Presence	Absence
1475	Methylobacterium-Methylorubrum_ASV1367	Methylobacterium-Methylorubrum_ASV1367	Presence	Absence
1476	Bosea_ASV346	Bosea_ASV346	Presence	Absence
1477	Unclassified_Beijerinckiaceae_25_ASV2894	Unclassified_Beijerinckiaceae_25_ASV2894	Presence	Absence
1478	Unclassified_Beijerinckiaceae_19_ASV2887	Unclassified_Beijerinckiaceae_19_ASV2887	Presence	Absence
1479	Unclassified_Beijerinckiaceae_10_ASV2878	Unclassified_Beijerinckiaceae_10_ASV2878	Presence	Absence
1480	Unclassified_Beijerinckiaceae_21_ASV2890	Unclassified_Beijerinckiaceae_21_ASV2890	Presence	Absence
1481	Unclassified_Beijerinckiaceae_24_ASV2893	Unclassified_Beijerinckiaceae_24_ASV2893	Presence	Absence
1482	Methylobacterium-Methylorubrum_ASV1368	Methylobacterium-Methylorubrum_ASV1368	Presence	Absence
1483	Methylobacterium-Methylorubrum_ASV1356	Methylobacterium-Methylorubrum_ASV1356	Presence	Absence
1484	Methylobacterium-Methylorubrum_ASV1360	Methylobacterium-Methylorubrum_ASV1360	Presence	Absence
1485	Unclassified_Beijerinckiaceae_7_ASV2900	Unclassified_Beijerinckiaceae_7_ASV2900	Presence	Absence
1486	Unclassified_Beijerinckiaceae_16_ASV2884	Unclassified_Beijerinckiaceae_16_ASV2884	Presence	Absence
1487	Microvirga_ASV1400	Microvirga_ASV1400	Presence	Absence
1488	Phreatobacter_ASV1675	Phreatobacter_ASV1675	Presence	Absence
1489	Unclassified_Xanthobacteraceae_1_ASV4950	Unclassified_Xanthobacteraceae_1_ASV4950	Presence	Absence
1490	Unclassified_Xanthobacteraceae_4_ASV4956	Unclassified_Xanthobacteraceae_4_ASV4956	Presence	Absence
1491	Rhodopseudomonas_ASV1865	Rhodopseudomonas_ASV1865	Presence	Absence
1492	Unclassified_Xanthobacteraceae_12_ASV4953	Unclassified_Xanthobacteraceae_12_ASV4953	Presence	Absence
1493	Unclassified_Xanthobacteraceae_10_ASV4951	Unclassified_Xanthobacteraceae_10_ASV4951	Presence	Absence
1494	Unclassified_D05-2_1_ASV3215	Unclassified_D05-2_1_ASV3215	Presence	Absence
1495	Camelimonas_ASV401	Camelimonas_ASV401	Presence	Absence
1496	1174-901-12_ASV16	1174-901-12_ASV16	Presence	Absence
1497	1174-901-12_ASV18	1174-901-12_ASV18	Presence	Absence
1498	1174-901-12_ASV15	1174-901-12_ASV15	Presence	Absence
1499	1174-901-12_ASV19	1174-901-12_ASV19	Presence	Absence
1500	Rhodomicrobium_ASV1847	Rhodomicrobium_ASV1847	Presence	Absence
1501	Rhodomicrobium_ASV1848	Rhodomicrobium_ASV1848	Presence	Absence
1502	Rhodomicrobium_ASV1849	Rhodomicrobium_ASV1849	Presence	Absence
1503	Rhodomicrobium_ASV1850	Rhodomicrobium_ASV1850	Presence	Absence
1504	Rhodomicrobium_ASV1846	Rhodomicrobium_ASV1846	Presence	Absence
1505	Rhodomicrobium_ASV1842	Rhodomicrobium_ASV1842	Presence	Absence
1506	Pseudaminobacter_ASV1737	Pseudaminobacter_ASV1737	Presence	Absence
1507	Unclassified_Devosiaceae_2_ASV3301	Unclassified_Devosiaceae_2_ASV3301	Presence	Absence
1508	Devosia_ASV831	Devosia_ASV831	Presence	Absence
1509	Devosia_ASV828	Devosia_ASV828	Presence	Absence
1510	Blastochloris_ASV327	Blastochloris_ASV327	Presence	Absence
1511	Blastochloris_ASV332	Blastochloris_ASV332	Presence	Absence
1512	Blastochloris_ASV331	Blastochloris_ASV331	Presence	Absence
1513	Blastochloris_ASV326	Blastochloris_ASV326	Presence	Absence
1514	Devosia_ASV824	Devosia_ASV824	Presence	Absence
1515	Devosia_ASV832	Devosia_ASV832	Presence	Absence
1516	Devosia_ASV825	Devosia_ASV825	Presence	Absence
1517	Devosia_ASV836	Devosia_ASV836	Presence	Absence
1518	Devosia_ASV834	Devosia_ASV834	Presence	Absence
1519	Devosia_ASV835	Devosia_ASV835	Presence	Absence
1520	Devosia_ASV829	Devosia_ASV829	Presence	Absence
1521	Devosia_ASV837	Devosia_ASV837	Presence	Absence
1522	Devosia_ASV827	Devosia_ASV827	Presence	Absence
1523	Devosia_ASV826	Devosia_ASV826	Presence	Absence
1524	Unclassified_Rhizobiales_Incertae_Sedis_2_ASV4333	Unclassified_Rhizobiales_Incertae_Sedis_2_ASV4333	Presence	Absence
1525	Unclassified_Rhizobiaceae_10_ASV4294	Unclassified_Rhizobiaceae_10_ASV4294	Presence	Absence
1526	Mesorhizobium_ASV1355	Mesorhizobium_ASV1355	Presence	Absence
1527	Unclassified_Rhizobiaceae_14_ASV4298	Unclassified_Rhizobiaceae_14_ASV4298	Presence	Absence
1528	Unclassified_Rhizobiaceae_24_ASV4309	Unclassified_Rhizobiaceae_24_ASV4309	Presence	Absence
1529	Hyphomicrobium_ASV1109	Hyphomicrobium_ASV1109	Presence	Absence
1530	Hyphomicrobium_ASV1115	Hyphomicrobium_ASV1115	Presence	Absence
1531	Unclassified_Beijerinckiaceae_13_ASV2881	Unclassified_Beijerinckiaceae_13_ASV2881	Presence	Absence
1532	Unclassified_Beijerinckiaceae_1_ASV2877	Unclassified_Beijerinckiaceae_1_ASV2877	Presence	Absence
1533	Unclassified_Beijerinckiaceae_12_ASV2880	Unclassified_Beijerinckiaceae_12_ASV2880	Presence	Absence
1534	Unclassified_Beijerinckiaceae_6_ASV2899	Unclassified_Beijerinckiaceae_6_ASV2899	Presence	Absence
1535	Unclassified_Stappiaceae_1_ASV4797	Unclassified_Stappiaceae_1_ASV4797	Presence	Absence
1536	Pseudovibrio_ASV1780	Pseudovibrio_ASV1780	Presence	Absence
1537	Unclassified_Hyphomicrobiaceae_1_ASV3626	Unclassified_Hyphomicrobiaceae_1_ASV3626	Presence	Absence
1538	Chthonobacter_ASV556	Chthonobacter_ASV556	Presence	Absence
1539	Unknown_Family_Alphaproteobacteria_Incertae_Sedis_ASV5002	Unknown_Family_Alphaproteobacteria_Incertae_Sedis_ASV5002	Presence	Absence
1540	Unclassified_Rhodobacteraceae_82_ASV4428	Unclassified_Rhodobacteraceae_82_ASV4428	Presence	Absence
1541	Unclassified_Rhodobacteraceae_64_ASV4408	Unclassified_Rhodobacteraceae_64_ASV4408	Presence	Absence
1542	Paracoccus_ASV1591	Paracoccus_ASV1591	Presence	Absence
1543	Paracoccus_ASV1603	Paracoccus_ASV1603	Presence	Absence
1544	Paracoccus_ASV1598	Paracoccus_ASV1598	Presence	Absence
1545	Unclassified_Rhodobacteraceae_66_ASV4410	Unclassified_Rhodobacteraceae_66_ASV4410	Presence	Absence
1546	Paracoccus_ASV1602	Paracoccus_ASV1602	Presence	Absence
1547	Paracoccus_ASV1589	Paracoccus_ASV1589	Presence	Absence
1548	Paracoccus_ASV1601	Paracoccus_ASV1601	Presence	Absence
1549	Unclassified_Rhodobacteraceae_41_ASV4383	Unclassified_Rhodobacteraceae_41_ASV4383	Presence	Absence
1550	Unclassified_Rhodobacteraceae_53_ASV4396	Unclassified_Rhodobacteraceae_53_ASV4396	Presence	Absence
1551	Unclassified_Rhodobacteraceae_19_ASV4358	Unclassified_Rhodobacteraceae_19_ASV4358	Presence	Absence
1552	Unclassified_Rhodobacteraceae_92_ASV4439	Unclassified_Rhodobacteraceae_92_ASV4439	Presence	Absence
1553	Roseovarius_ASV1918	Roseovarius_ASV1918	Presence	Absence
1554	Unclassified_Rhodobacteraceae_76_ASV4421	Unclassified_Rhodobacteraceae_76_ASV4421	Presence	Absence
1555	Unclassified_Rhodobacteraceae_81_ASV4427	Unclassified_Rhodobacteraceae_81_ASV4427	Presence	Absence
1556	Rubellimicrobium_ASV1927	Rubellimicrobium_ASV1927	Presence	Absence
1557	Unclassified_Rhodobacteraceae_98_ASV4445	Unclassified_Rhodobacteraceae_98_ASV4445	Presence	Absence
1558	Rubellimicrobium_ASV1932	Rubellimicrobium_ASV1932	Presence	Absence
1559	Rubellimicrobium_ASV1929	Rubellimicrobium_ASV1929	Presence	Absence
1560	Rubellimicrobium_ASV1926	Rubellimicrobium_ASV1926	Presence	Absence
1561	Unclassified_Rhodobacteraceae_14_ASV4353	Unclassified_Rhodobacteraceae_14_ASV4353	Presence	Absence
1562	Unclassified_Rhodobacteraceae_7_ASV4414	Unclassified_Rhodobacteraceae_7_ASV4414	Presence	Absence
1563	Paracoccus_ASV1600	Paracoccus_ASV1600	Presence	Absence
1564	Unclassified_Rhodobacteraceae_40_ASV4382	Unclassified_Rhodobacteraceae_40_ASV4382	Presence	Absence
1565	Paracoccus_ASV1597	Paracoccus_ASV1597	Presence	Absence
1566	Paracoccus_ASV1590	Paracoccus_ASV1590	Presence	Absence
1567	Paracoccus_ASV1593	Paracoccus_ASV1593	Presence	Absence
1568	Unclassified_Rhodobacteraceae_6_ASV4403	Unclassified_Rhodobacteraceae_6_ASV4403	Presence	Absence
1569	Unclassified_Rhodobacteraceae_29_ASV4369	Unclassified_Rhodobacteraceae_29_ASV4369	Presence	Absence
1570	Unclassified_Rhodobacteraceae_70_ASV4415	Unclassified_Rhodobacteraceae_70_ASV4415	Presence	Absence
1571	Roseovarius_ASV1915	Roseovarius_ASV1915	Presence	Absence
1572	Sulfitobacter_ASV2273	Sulfitobacter_ASV2273	Presence	Absence
1573	Roseovarius_ASV1916	Roseovarius_ASV1916	Presence	Absence
1574	Unclassified_Rhodobacteraceae_85_ASV4431	Unclassified_Rhodobacteraceae_85_ASV4431	Presence	Absence
1575	Unclassified_Rhodobacteraceae_84_ASV4430	Unclassified_Rhodobacteraceae_84_ASV4430	Presence	Absence
1576	Unclassified_Rhodobacteraceae_37_ASV4378	Unclassified_Rhodobacteraceae_37_ASV4378	Presence	Absence
1577	Unclassified_Rhodobacteraceae_51_ASV4394	Unclassified_Rhodobacteraceae_51_ASV4394	Presence	Absence
1578	Unclassified_Rhodobacteraceae_5_ASV4392	Unclassified_Rhodobacteraceae_5_ASV4392	Presence	Absence
1579	Unclassified_Rhodobacteraceae_68_ASV4412	Unclassified_Rhodobacteraceae_68_ASV4412	Presence	Absence
1580	Unclassified_Rhodobacteraceae_27_ASV4367	Unclassified_Rhodobacteraceae_27_ASV4367	Presence	Absence
1581	Unclassified_Rhodobacteraceae_2_ASV4359	Unclassified_Rhodobacteraceae_2_ASV4359	Presence	Absence
1582	Paracoccus_ASV1596	Paracoccus_ASV1596	Presence	Absence
1583	Rhodobacter_ASV1827	Rhodobacter_ASV1827	Presence	Absence
1584	Rhodobacter_ASV1825	Rhodobacter_ASV1825	Presence	Absence
1585	Rhodobacter_ASV1824	Rhodobacter_ASV1824	Presence	Absence
1586	Unclassified_Rhodobacteraceae_15_ASV4354	Unclassified_Rhodobacteraceae_15_ASV4354	Presence	Absence
1587	Unclassified_Rhodobacteraceae_59_ASV4402	Unclassified_Rhodobacteraceae_59_ASV4402	Presence	Absence
1588	Unclassified_Rhodobacteraceae_71_ASV4416	Unclassified_Rhodobacteraceae_71_ASV4416	Presence	Absence
1589	Unclassified_Rhodobacteraceae_26_ASV4366	Unclassified_Rhodobacteraceae_26_ASV4366	Presence	Absence
1590	Unclassified_Rhodobacteraceae_17_ASV4356	Unclassified_Rhodobacteraceae_17_ASV4356	Presence	Absence
1591	Unclassified_Rhodobacteraceae_80_ASV4426	Unclassified_Rhodobacteraceae_80_ASV4426	Presence	Absence
1592	Unclassified_Rhodobacteraceae_32_ASV4373	Unclassified_Rhodobacteraceae_32_ASV4373	Presence	Absence
1593	Gemmobacter_ASV1007	Gemmobacter_ASV1007	Presence	Absence
1594	Unclassified_Rhodobacteraceae_63_ASV4407	Unclassified_Rhodobacteraceae_63_ASV4407	Presence	Absence
1595	Unclassified_Rhodobacteraceae_60_ASV4404	Unclassified_Rhodobacteraceae_60_ASV4404	Presence	Absence
1596	Unclassified_Rhodobacteraceae_88_ASV4434	Unclassified_Rhodobacteraceae_88_ASV4434	Presence	Absence
1597	Unclassified_Rhodobacteraceae_42_ASV4384	Unclassified_Rhodobacteraceae_42_ASV4384	Presence	Absence
1598	Unclassified_Rhodobacteraceae_9_ASV4436	Unclassified_Rhodobacteraceae_9_ASV4436	Presence	Absence
1599	Unclassified_Rhodobacteraceae_21_ASV4361	Unclassified_Rhodobacteraceae_21_ASV4361	Presence	Absence
1600	Mesorhizobium_ASV1352	Mesorhizobium_ASV1352	Presence	Absence
1601	Unclassified_Rhizobiaceae_8_ASV4320	Unclassified_Rhizobiaceae_8_ASV4320	Presence	Absence
1602	Unclassified_Rhizobiaceae_29_ASV4314	Unclassified_Rhizobiaceae_29_ASV4314	Presence	Absence
1603	Unclassified_Rhizobiaceae_16_ASV4300	Unclassified_Rhizobiaceae_16_ASV4300	Presence	Absence
1604	Unclassified_Rhizobiaceae_4_ASV4316	Unclassified_Rhizobiaceae_4_ASV4316	Presence	Absence
1605	Aquamicrobium_ASV202	Aquamicrobium_ASV202	Presence	Absence
1606	Nitratireductor_ASV1474	Nitratireductor_ASV1474	Presence	Absence
1607	Aquamicrobium_ASV201	Aquamicrobium_ASV201	Presence	Absence
1608	Aquamicrobium_ASV203	Aquamicrobium_ASV203	Presence	Absence
1609	Dichotomicrobium_ASV840	Dichotomicrobium_ASV840	Presence	Absence
1610	Filomicrobium_ASV920	Filomicrobium_ASV920	Presence	Absence
1611	Filomicrobium_ASV921	Filomicrobium_ASV921	Presence	Absence
1612	Unclassified_Methyloligellaceae_2_ASV3834	Unclassified_Methyloligellaceae_2_ASV3834	Presence	Absence
1613	Unclassified_Kiloniellaceae_4_ASV3676	Unclassified_Kiloniellaceae_4_ASV3676	Presence	Absence
1614	Unclassified_Alphaproteobacteria_9_ASV2577	Unclassified_Alphaproteobacteria_9_ASV2577	Presence	Absence
1615	Unclassified_Alphaproteobacteria_10_ASV2542	Unclassified_Alphaproteobacteria_10_ASV2542	Presence	Absence
1616	Unclassified_Rhodobacteraceae_3_ASV4370	Unclassified_Rhodobacteraceae_3_ASV4370	Presence	Absence
1617	Unclassified_Kiloniellaceae_7_ASV3679	Unclassified_Kiloniellaceae_7_ASV3679	Presence	Absence
1618	Unclassified_A0839_1_ASV2428	Unclassified_A0839_1_ASV2428	Presence	Absence
1619	Unclassified_A0839_2_ASV2429	Unclassified_A0839_2_ASV2429	Presence	Absence
1620	Unclassified_Terasakiellaceae_1_ASV4844	Unclassified_Terasakiellaceae_1_ASV4844	Presence	Absence
1621	Unclassified_Rhodospirillaceae_1_ASV4453	Unclassified_Rhodospirillaceae_1_ASV4453	Presence	Absence
1622	Unclassified_Terasakiellaceae_3_ASV4846	Unclassified_Terasakiellaceae_3_ASV4846	Presence	Absence
1623	Unclassified_Terasakiellaceae_2_ASV4845	Unclassified_Terasakiellaceae_2_ASV4845	Presence	Absence
1624	Unclassified_Kiloniellaceae_6_ASV3678	Unclassified_Kiloniellaceae_6_ASV3678	Presence	Absence
1625	Thalassospira_ASV2346	Thalassospira_ASV2346	Presence	Absence
1626	Thalassospira_ASV2347	Thalassospira_ASV2347	Presence	Absence
1627	Unclassified_Reyranellaceae_1_ASV4269	Unclassified_Reyranellaceae_1_ASV4269	Presence	Absence
1628	Unclassified_Alphaproteobacteria_17_ASV2549	Unclassified_Alphaproteobacteria_17_ASV2549	Presence	Absence
1629	Unclassified_Alphaproteobacteria_3_ASV2563	Unclassified_Alphaproteobacteria_3_ASV2563	Presence	Absence
1630	Unclassified_Alphaproteobacteria_26_ASV2559	Unclassified_Alphaproteobacteria_26_ASV2559	Presence	Absence
1631	Unclassified_Alphaproteobacteria_32_ASV2566	Unclassified_Alphaproteobacteria_32_ASV2566	Presence	Absence
1632	Unclassified_Thalassobaculales_2_ASV4850	Unclassified_Thalassobaculales_2_ASV4850	Presence	Absence
1633	Unclassified_Alphaproteobacteria_7_ASV2575	Unclassified_Alphaproteobacteria_7_ASV2575	Presence	Absence
1634	Unclassified_Thalassobaculales_4_ASV4852	Unclassified_Thalassobaculales_4_ASV4852	Presence	Absence
1635	Unclassified_Alphaproteobacteria_28_ASV2561	Unclassified_Alphaproteobacteria_28_ASV2561	Presence	Absence
1636	Dongia_ASV848	Dongia_ASV848	Presence	Absence
1637	Unclassified_Acetobacteraceae_2_ASV2467	Unclassified_Acetobacteraceae_2_ASV2467	Presence	Absence
1638	Roseomonas_ASV1912	Roseomonas_ASV1912	Presence	Absence
1639	Roseomonas_ASV1906	Roseomonas_ASV1906	Presence	Absence
1640	Unclassified_Acetobacteraceae_9_ASV2474	Unclassified_Acetobacteraceae_9_ASV2474	Presence	Absence
1641	Asaia_ASV225	Asaia_ASV225	Presence	Absence
1642	Gluconobacter_ASV1022	Gluconobacter_ASV1022	Presence	Absence
1643	Acidiphilium_ASV47	Acidiphilium_ASV47	Presence	Absence
1644	Unclassified_Elsterales_1_ASV3319	Unclassified_Elsterales_1_ASV3319	Presence	Absence
1645	Unclassified_Azospirillaceae_4_ASV2664	Unclassified_Azospirillaceae_4_ASV2664	Presence	Absence
1646	Unclassified_Azospirillaceae_2_ASV2662	Unclassified_Azospirillaceae_2_ASV2662	Presence	Absence
1647	Unclassified_Azospirillaceae_1_ASV2661	Unclassified_Azospirillaceae_1_ASV2661	Presence	Absence
1648	Unclassified_Alphaproteobacteria_22_ASV2555	Unclassified_Alphaproteobacteria_22_ASV2555	Presence	Absence
1649	Defluviicoccus_ASV720	Defluviicoccus_ASV720	Presence	Absence
1650	Unclassified_Defluviicoccales_1_ASV3220	Unclassified_Defluviicoccales_1_ASV3220	Presence	Absence
1651	Defluviicoccus_ASV721	Defluviicoccus_ASV721	Presence	Absence
1652	Unclassified_Alphaproteobacteria_16_ASV2548	Unclassified_Alphaproteobacteria_16_ASV2548	Presence	Absence
1653	Unclassified_Alphaproteobacteria_11_ASV2543	Unclassified_Alphaproteobacteria_11_ASV2543	Presence	Absence
1654	Unclassified_Kiloniellaceae_5_ASV3677	Unclassified_Kiloniellaceae_5_ASV3677	Presence	Absence
1655	Unclassified_Kiloniellaceae_3_ASV3675	Unclassified_Kiloniellaceae_3_ASV3675	Presence	Absence
1656	Tistlia_ASV2372	Tistlia_ASV2372	Presence	Absence
1657	Pelagibius_ASV1615	Pelagibius_ASV1615	Presence	Absence
1658	Unclassified_Kiloniellaceae_2_ASV3674	Unclassified_Kiloniellaceae_2_ASV3674	Presence	Absence
1659	Unclassified_Fodinicurvataceae_1_ASV3455	Unclassified_Fodinicurvataceae_1_ASV3455	Presence	Absence
1660	Unclassified_Kiloniellaceae_8_ASV3680	Unclassified_Kiloniellaceae_8_ASV3680	Presence	Absence
1661	Rhodovibrio_ASV1870	Rhodovibrio_ASV1870	Presence	Absence
1662	Rhodovibrio_ASV1873	Rhodovibrio_ASV1873	Presence	Absence
1663	Rhodovibrio_ASV1871	Rhodovibrio_ASV1871	Presence	Absence
1664	Unclassified_Kiloniellaceae_1_ASV3673	Unclassified_Kiloniellaceae_1_ASV3673	Presence	Absence
1665	Rhodovibrio_ASV1872	Rhodovibrio_ASV1872	Presence	Absence
1666	Rhodovibrio_ASV1874	Rhodovibrio_ASV1874	Presence	Absence
1667	Unclassified_Carnobacteriaceae_2_ASV2996	Unclassified_Carnobacteriaceae_2_ASV2996	Presence	Absence
1668	Cardiobacterium_ASV495	Cardiobacterium_ASV495	Presence	Absence
1669	Unclassified_Bacteroidales_15_ASV2715	Unclassified_Bacteroidales_15_ASV2715	Presence	Absence
1670	Sphingomonas_ASV2133	Sphingomonas_ASV2133	Presence	Absence
1671	Unclassified_Sphingomonadaceae_1_ASV4747	Unclassified_Sphingomonadaceae_1_ASV4747	Presence	Absence
1672	Sphingomonas_ASV2124	Sphingomonas_ASV2124	Presence	Absence
1673	Sphingomonas_ASV2138	Sphingomonas_ASV2138	Presence	Absence
1674	Sphingomonas_ASV2139	Sphingomonas_ASV2139	Presence	Absence
1675	Sphingomonas_ASV2131	Sphingomonas_ASV2131	Presence	Absence
1676	Sphingomonas_ASV2135	Sphingomonas_ASV2135	Presence	Absence
1677	Sphingomonas_ASV2130	Sphingomonas_ASV2130	Presence	Absence
1678	Sphingomonas_ASV2122	Sphingomonas_ASV2122	Presence	Absence
1679	Sphingomonas_ASV2128	Sphingomonas_ASV2128	Presence	Absence
1680	Sphingomonas_ASV2127	Sphingomonas_ASV2127	Presence	Absence
1681	Sphingomonas_ASV2123	Sphingomonas_ASV2123	Presence	Absence
1682	Sphingomonas_ASV2125	Sphingomonas_ASV2125	Presence	Absence
1683	Sandaracinobacter_ASV2032	Sandaracinobacter_ASV2032	Presence	Absence
1684	Sandaracinobacter_ASV2031	Sandaracinobacter_ASV2031	Presence	Absence
1685	Sandaracinobacter_ASV2029	Sandaracinobacter_ASV2029	Presence	Absence
1686	Sphingobium_ASV2119	Sphingobium_ASV2119	Presence	Absence
1687	Sphingopyxis_ASV2145	Sphingopyxis_ASV2145	Presence	Absence
1688	Magnetospirillum_ASV1299	Magnetospirillum_ASV1299	Presence	Absence
1689	Unclassified_Micavibrionales_1_ASV3842	Unclassified_Micavibrionales_1_ASV3842	Presence	Absence
1690	Unclassified_Magnetospiraceae_2_ASV3790	Unclassified_Magnetospiraceae_2_ASV3790	Presence	Absence
1691	Unclassified_Micavibrionaceae_2_ASV3838	Unclassified_Micavibrionaceae_2_ASV3838	Presence	Absence
1692	Unclassified_Micavibrionaceae_3_ASV3839	Unclassified_Micavibrionaceae_3_ASV3839	Presence	Absence
1693	Unclassified_Micavibrionaceae_4_ASV3840	Unclassified_Micavibrionaceae_4_ASV3840	Presence	Absence
1694	Unclassified_Micavibrionaceae_1_ASV3837	Unclassified_Micavibrionaceae_1_ASV3837	Presence	Absence
1695	Sphingobium_ASV2118	Sphingobium_ASV2118	Presence	Absence
1696	Novosphingobium_ASV1515	Novosphingobium_ASV1515	Presence	Absence
1697	Novosphingobium_ASV1510	Novosphingobium_ASV1510	Presence	Absence
1698	Unclassified_Sphingomonadaceae_13_ASV4751	Unclassified_Sphingomonadaceae_13_ASV4751	Presence	Absence
1699	Novosphingobium_ASV1511	Novosphingobium_ASV1511	Presence	Absence
1700	Sphingobium_ASV2117	Sphingobium_ASV2117	Presence	Absence
1701	Unclassified_Sphingomonadaceae_12_ASV4750	Unclassified_Sphingomonadaceae_12_ASV4750	Presence	Absence
1702	Unclassified_Sphingomonadaceae_9_ASV4760	Unclassified_Sphingomonadaceae_9_ASV4760	Presence	Absence
1703	Altererythrobacter_ASV164	Altererythrobacter_ASV164	Presence	Absence
1704	Unclassified_Sphingomonadaceae_14_ASV4752	Unclassified_Sphingomonadaceae_14_ASV4752	Presence	Absence
1705	Unclassified_Alphaproteobacteria_6_ASV2574	Unclassified_Alphaproteobacteria_6_ASV2574	Presence	Absence
1706	Clostridium_sensu_stricto_1_ASV569	Clostridium_sensu_stricto_1_ASV569	Presence	Absence
1707	Clostridium_sensu_stricto_1_ASV593	Clostridium_sensu_stricto_1_ASV593	Presence	Absence
1708	Geothermobacter_ASV1012	Geothermobacter_ASV1012	Presence	Absence
1709	Unclassified_SAR324_clade(Marine_group_B)_7_ASV4601	Unclassified_SAR324_clade(Marine_group_B)_7_ASV4601	Presence	Absence
1710	Unclassified_SAR324_clade(Marine_group_B)_3_ASV4597	Unclassified_SAR324_clade(Marine_group_B)_3_ASV4597	Presence	Absence
1711	Unclassified_Sva0485_1_ASV4825	Unclassified_Sva0485_1_ASV4825	Presence	Absence
1712	Haliangium_ASV1050	Haliangium_ASV1050	Presence	Absence
1713	Haliangium_ASV1051	Haliangium_ASV1051	Presence	Absence
1714	Haliangium_ASV1049	Haliangium_ASV1049	Presence	Absence
1715	Haliangium_ASV1052	Haliangium_ASV1052	Presence	Absence
1716	P3OB-42_ASV1561	P3OB-42_ASV1561	Presence	Absence
1717	P3OB-42_ASV1572	P3OB-42_ASV1572	Presence	Absence
1718	Unclassified_Nannocystaceae_1_ASV3919	Unclassified_Nannocystaceae_1_ASV3919	Presence	Absence
1719	Desulfobacca_ASV769	Desulfobacca_ASV769	Presence	Absence
1720	SEEP-SRB1_ASV2070	SEEP-SRB1_ASV2070	Presence	Absence
1721	SEEP-SRB1_ASV2067	SEEP-SRB1_ASV2067	Presence	Absence
1722	Unclassified_Sva0485_2_ASV4826	Unclassified_Sva0485_2_ASV4826	Presence	Absence
1723	Unclassified_Sva0485_4_ASV4828	Unclassified_Sva0485_4_ASV4828	Presence	Absence
1724	Unclassified_Sva0485_7_ASV4831	Unclassified_Sva0485_7_ASV4831	Presence	Absence
1725	Unclassified_UASB-TL25_ASV2400	Unclassified_UASB-TL25_ASV2400	Presence	Absence
1726	Unclassified_NB1-j_11_ASV3925	Unclassified_NB1-j_11_ASV3925	Presence	Absence
1727	Unclassified_Desulfobacterota_7_ASV3247	Unclassified_Desulfobacterota_7_ASV3247	Presence	Absence
1728	Bdellovibrio_ASV300	Bdellovibrio_ASV300	Presence	Absence
1729	Bdellovibrio_ASV298	Bdellovibrio_ASV298	Presence	Absence
1730	Bdellovibrio_ASV294	Bdellovibrio_ASV294	Presence	Absence
1731	Bdellovibrio_ASV296	Bdellovibrio_ASV296	Presence	Absence
1732	Bdellovibrio_ASV297	Bdellovibrio_ASV297	Presence	Absence
1733	Bdellovibrio_ASV302	Bdellovibrio_ASV302	Presence	Absence
1734	Unclassified_Desulfobacterota_12_ASV3240	Unclassified_Desulfobacterota_12_ASV3240	Presence	Absence
1735	Unclassified_PB19_3_ASV4073	Unclassified_PB19_3_ASV4073	Presence	Absence
1736	Unclassified_mle1-27_2_ASV3886	Unclassified_mle1-27_2_ASV3886	Presence	Absence
1737	Unclassified_Desulfobacterota_10_ASV3238	Unclassified_Desulfobacterota_10_ASV3238	Presence	Absence
1738	Unclassified_PB19_2_ASV4072	Unclassified_PB19_2_ASV4072	Presence	Absence
1739	Unclassified_PB19_1_ASV4071	Unclassified_PB19_1_ASV4071	Presence	Absence
1740	Unclassified_SAR324_clade(Marine_group_B)_9_ASV4603	Unclassified_SAR324_clade(Marine_group_B)_9_ASV4603	Presence	Absence
1741	Unclassified_SAR324_clade(Marine_group_B)_6_ASV4600	Unclassified_SAR324_clade(Marine_group_B)_6_ASV4600	Presence	Absence
1742	Unclassified_SAR324_clade(Marine_group_B)_2_ASV4596	Unclassified_SAR324_clade(Marine_group_B)_2_ASV4596	Presence	Absence
1743	Unclassified_SAR324_clade(Marine_group_B)_14_ASV4594	Unclassified_SAR324_clade(Marine_group_B)_14_ASV4594	Presence	Absence
1744	Unclassified_SAR324_clade(Marine_group_B)_8_ASV4602	Unclassified_SAR324_clade(Marine_group_B)_8_ASV4602	Presence	Absence
1745	Unclassified_bacteriap25_1_ASV2701	Unclassified_bacteriap25_1_ASV2701	Presence	Absence
1746	Unclassified_bacteriap25_4_ASV2704	Unclassified_bacteriap25_4_ASV2704	Presence	Absence
1747	Unclassified_Bradymonadaceae_12_ASV2923	Unclassified_Bradymonadaceae_12_ASV2923	Presence	Absence
1748	Unclassified_Bradymonadaceae_14_ASV2925	Unclassified_Bradymonadaceae_14_ASV2925	Presence	Absence
1749	Unclassified_Bradymonadaceae_2_ASV2931	Unclassified_Bradymonadaceae_2_ASV2931	Presence	Absence
1750	Unclassified_Bradymonadaceae_4_ASV2933	Unclassified_Bradymonadaceae_4_ASV2933	Presence	Absence
1751	Unclassified_Bradymonadaceae_8_ASV2937	Unclassified_Bradymonadaceae_8_ASV2937	Presence	Absence
1752	Unclassified_Bradymonadaceae_19_ASV2930	Unclassified_Bradymonadaceae_19_ASV2930	Presence	Absence
1753	Unclassified_Bradymonadaceae_7_ASV2936	Unclassified_Bradymonadaceae_7_ASV2936	Presence	Absence
1754	Unclassified_Bradymonadaceae_11_ASV2922	Unclassified_Bradymonadaceae_11_ASV2922	Presence	Absence
1755	Unclassified_Bradymonadaceae_5_ASV2934	Unclassified_Bradymonadaceae_5_ASV2934	Presence	Absence
1756	Unclassified_Bradymonadales_3_ASV2948	Unclassified_Bradymonadales_3_ASV2948	Presence	Absence
1757	Unclassified_Bradymonadales_1_ASV2939	Unclassified_Bradymonadales_1_ASV2939	Presence	Absence
1758	Unclassified_Bradymonadales_10_ASV2941	Unclassified_Bradymonadales_10_ASV2941	Presence	Absence
1759	Unclassified_Bradymonadales_12_ASV2943	Unclassified_Bradymonadales_12_ASV2943	Presence	Absence
1760	Unclassified_Bradymonadales_7_ASV2952	Unclassified_Bradymonadales_7_ASV2952	Presence	Absence
1761	Unclassified_Bradymonadales_1_ASV2940	Unclassified_Bradymonadales_1_ASV2940	Presence	Absence
1762	Unclassified_Bradymonadaceae_10_ASV2921	Unclassified_Bradymonadaceae_10_ASV2921	Presence	Absence
1763	Unclassified_Bradymonadaceae_9_ASV2938	Unclassified_Bradymonadaceae_9_ASV2938	Presence	Absence
1764	Unclassified_Bradymonadaceae_17_ASV2928	Unclassified_Bradymonadaceae_17_ASV2928	Presence	Absence
1765	Unclassified_Bradymonadaceae_3_ASV2932	Unclassified_Bradymonadaceae_3_ASV2932	Presence	Absence
1766	Unclassified_Bradymonadaceae_1_ASV2920	Unclassified_Bradymonadaceae_1_ASV2920	Presence	Absence
1767	Unclassified_Bradymonadales_13_ASV2944	Unclassified_Bradymonadales_13_ASV2944	Presence	Absence
1768	Unclassified_Bradymonadales_14_ASV2945	Unclassified_Bradymonadales_14_ASV2945	Presence	Absence
1769	Unclassified_Bradymonadales_6_ASV2951	Unclassified_Bradymonadales_6_ASV2951	Presence	Absence
1770	Unclassified_Desulfobacterota_11_ASV3239	Unclassified_Desulfobacterota_11_ASV3239	Presence	Absence
1771	Unclassified_Desulfobacterota_3_ASV3243	Unclassified_Desulfobacterota_3_ASV3243	Presence	Absence
1772	Unclassified_Bradymonadales_11_ASV2942	Unclassified_Bradymonadales_11_ASV2942	Presence	Absence
1773	Unclassified_Desulfobacterota_8_ASV3248	Unclassified_Desulfobacterota_8_ASV3248	Presence	Absence
1774	Unclassified_Bradymonadales_8_ASV2953	Unclassified_Bradymonadales_8_ASV2953	Presence	Absence
1775	Unclassified_Desulfovibrionaceae_1_ASV3278	Unclassified_Desulfovibrionaceae_1_ASV3278	Presence	Absence
1776	Desulfovibrio_ASV813	Desulfovibrio_ASV813	Presence	Absence
1777	Unclassified_Desulfovibrionales_1_ASV3291	Unclassified_Desulfovibrionales_1_ASV3291	Presence	Absence
1778	Desulfovermiculus_ASV801	Desulfovermiculus_ASV801	Presence	Absence
1779	Desulfovermiculus_ASV802	Desulfovermiculus_ASV802	Presence	Absence
1780	Desulfovermiculus_ASV800	Desulfovermiculus_ASV800	Presence	Absence
1781	Desulfovibrio_ASV818	Desulfovibrio_ASV818	Presence	Absence
1782	Desulfovibrio_ASV822	Desulfovibrio_ASV822	Presence	Absence
1783	Desulfovibrio_ASV812	Desulfovibrio_ASV812	Presence	Absence
1784	Desulfovibrio_ASV815	Desulfovibrio_ASV815	Presence	Absence
1785	Desulfovibrio_ASV814	Desulfovibrio_ASV814	Presence	Absence
1786	Desulfovibrio_ASV816	Desulfovibrio_ASV816	Presence	Absence
1787	Desulfovibrio_ASV817	Desulfovibrio_ASV817	Presence	Absence
1788	Desulfovibrio_ASV809	Desulfovibrio_ASV809	Presence	Absence
1789	Desulfovibrio_ASV819	Desulfovibrio_ASV819	Presence	Absence
1790	Desulfovibrio_ASV807	Desulfovibrio_ASV807	Presence	Absence
1791	Desulfovibrio_ASV811	Desulfovibrio_ASV811	Presence	Absence
1792	Unclassified_Silvanigrellaceae_1_ASV4723	Unclassified_Silvanigrellaceae_1_ASV4723	Presence	Absence
1793	Unclassified_Oligoflexaceae_5_ASV3997	Unclassified_Oligoflexaceae_5_ASV3997	Presence	Absence
1794	Unclassified_Oligoflexaceae_1_ASV3993	Unclassified_Oligoflexaceae_1_ASV3993	Presence	Absence
1795	Oligoflexus_ASV1546	Oligoflexus_ASV1546	Presence	Absence
1796	Unclassified_Hydrogenedensaceae_1_ASV3617	Unclassified_Hydrogenedensaceae_1_ASV3617	Presence	Absence
1797	Unclassified_Hydrogenedensaceae_4_ASV3620	Unclassified_Hydrogenedensaceae_4_ASV3620	Presence	Absence
1798	YC-ZSS-LKJ63_ASV5114	YC-ZSS-LKJ63_ASV5114	Presence	Absence
1799	Unclassified_Armatimonadales_ASV215	Unclassified_Armatimonadales_ASV215	Presence	Absence
1800	Abditibacterium_ASV26	Abditibacterium_ASV26	Presence	Absence
1801	Abditibacterium_ASV31	Abditibacterium_ASV31	Presence	Absence
1802	Abditibacterium_ASV27	Abditibacterium_ASV27	Presence	Absence
1803	Unclassified_Fimbriimonadaceae_1_ASV3384	Unclassified_Fimbriimonadaceae_1_ASV3384	Presence	Absence
1804	Unclassified_WPS-2_ASV5105	Unclassified_WPS-2_ASV5105	Presence	Absence
1805	Unclassified_vadinHA49_7_ASV4884	Unclassified_vadinHA49_7_ASV4884	Presence	Absence
1806	Acanthopleuribacter_ASV34	Acanthopleuribacter_ASV34	Presence	Absence
1807	Unknown_Family_Gammaproteobacteria_Incertae_Sedis_4_ASV5014	Unknown_Family_Gammaproteobacteria_Incertae_Sedis_4_ASV5014	Presence	Absence
1808	Unknown_Family_Gammaproteobacteria_Incertae_Sedis_1_ASV5003	Unknown_Family_Gammaproteobacteria_Incertae_Sedis_1_ASV5003	Presence	Absence
1809	Unclassified_Solimonadaceae_2_ASV4739	Unclassified_Solimonadaceae_2_ASV4739	Presence	Absence
1810	Pseudomonas_ASV1754	Pseudomonas_ASV1754	Presence	Absence
1811	Pseudofulvimonas_ASV1744	Pseudofulvimonas_ASV1744	Presence	Absence
1812	Unclassified_Gammaproteobacteria_2_ASV3473	Unclassified_Gammaproteobacteria_2_ASV3473	Presence	Absence
1813	Unclassified_Solimonadaceae_1_ASV4738	Unclassified_Solimonadaceae_1_ASV4738	Presence	Absence
1814	Candidatus_Competibacter_ASV431	Candidatus_Competibacter_ASV431	Presence	Absence
1815	MND1_ASV1402	MND1_ASV1402	Presence	Absence
1816	Massilia_ASV1331	Massilia_ASV1331	Presence	Absence
1817	Massilia_ASV1333	Massilia_ASV1333	Presence	Absence
1818	Unclassified_Nitrosomonadaceae_2_ASV3975	Unclassified_Nitrosomonadaceae_2_ASV3975	Presence	Absence
1819	Unclassified_Sutterellaceae_2_ASV4824	Unclassified_Sutterellaceae_2_ASV4824	Presence	Absence
1820	Unclassified_MWH-UniP1_aquatic_group_1_ASV3910	Unclassified_MWH-UniP1_aquatic_group_1_ASV3910	Presence	Absence
1821	Azoarcus_ASV247	Azoarcus_ASV247	Presence	Absence
1822	Unclassified_Rhodocyclaceae_4_ASV4450	Unclassified_Rhodocyclaceae_4_ASV4450	Presence	Absence
1823	Thauera_ASV2349	Thauera_ASV2349	Presence	Absence
1824	Unclassified_Rhodocyclaceae_3_ASV4449	Unclassified_Rhodocyclaceae_3_ASV4449	Presence	Absence
1825	Unclassified_Rhodocyclaceae_1_ASV4447	Unclassified_Rhodocyclaceae_1_ASV4447	Presence	Absence
1826	Unclassified_Rhodocyclaceae_2_ASV4448	Unclassified_Rhodocyclaceae_2_ASV4448	Presence	Absence
1827	Unclassified_Burkholderiales_1_ASV2958	Unclassified_Burkholderiales_1_ASV2958	Presence	Absence
1828	Unclassified_Rhodocyclaceae_5_ASV4451	Unclassified_Rhodocyclaceae_5_ASV4451	Presence	Absence
1829	Thauera_ASV2348	Thauera_ASV2348	Presence	Absence
1830	Unclassified_Comamonadaceae_22_ASV3119	Unclassified_Comamonadaceae_22_ASV3119	Presence	Absence
1831	Unclassified_Comamonadaceae_5_ASV3132	Unclassified_Comamonadaceae_5_ASV3132	Presence	Absence
1832	Unclassified_Comamonadaceae_15_ASV3111	Unclassified_Comamonadaceae_15_ASV3111	Presence	Absence
1833	Unclassified_Comamonadaceae_19_ASV3115	Unclassified_Comamonadaceae_19_ASV3115	Presence	Absence
1834	Unclassified_Comamonadaceae_1_ASV3105	Unclassified_Comamonadaceae_1_ASV3105	Presence	Absence
1835	Unclassified_Comamonadaceae_11_ASV3107	Unclassified_Comamonadaceae_11_ASV3107	Presence	Absence
1836	Unclassified_Comamonadaceae_26_ASV3123	Unclassified_Comamonadaceae_26_ASV3123	Presence	Absence
1837	Comamonas_ASV637	Comamonas_ASV637	Presence	Absence
1838	Comamonas_ASV636	Comamonas_ASV636	Presence	Absence
1839	Unclassified_Comamonadaceae_24_ASV3121	Unclassified_Comamonadaceae_24_ASV3121	Presence	Absence
1840	Unclassified_Comamonadaceae_12_ASV3108	Unclassified_Comamonadaceae_12_ASV3108	Presence	Absence
1841	Unclassified_Comamonadaceae_16_ASV3112	Unclassified_Comamonadaceae_16_ASV3112	Presence	Absence
1842	Unclassified_Comamonadaceae_25_ASV3122	Unclassified_Comamonadaceae_25_ASV3122	Presence	Absence
1843	Unclassified_Comamonadaceae_9_ASV3136	Unclassified_Comamonadaceae_9_ASV3136	Presence	Absence
1844	Unclassified_Comamonadaceae_8_ASV3135	Unclassified_Comamonadaceae_8_ASV3135	Presence	Absence
1845	Unclassified_Comamonadaceae_17_ASV3113	Unclassified_Comamonadaceae_17_ASV3113	Presence	Absence
1846	Unclassified_Comamonadaceae_10_ASV3106	Unclassified_Comamonadaceae_10_ASV3106	Presence	Absence
1847	Unclassified_Comamonadaceae_27_ASV3124	Unclassified_Comamonadaceae_27_ASV3124	Presence	Absence
1848	Comamonas_ASV638	Comamonas_ASV638	Presence	Absence
1849	Hydrogenophaga_ASV1096	Hydrogenophaga_ASV1096	Presence	Absence
1850	Hydrogenophaga_ASV1098	Hydrogenophaga_ASV1098	Presence	Absence
1851	Unclassified_Comamonadaceae_20_ASV3117	Unclassified_Comamonadaceae_20_ASV3117	Presence	Absence
1852	Unclassified_Comamonadaceae_31_ASV3129	Unclassified_Comamonadaceae_31_ASV3129	Presence	Absence
1853	Methylotenera_ASV1393	Methylotenera_ASV1393	Presence	Absence
1854	Methylotenera_ASV1392	Methylotenera_ASV1392	Presence	Absence
1855	Unclassified_Neisseriaceae_7_ASV3954	Unclassified_Neisseriaceae_7_ASV3954	Presence	Absence
1856	Neisseria_ASV1465	Neisseria_ASV1465	Presence	Absence
1857	Snodgrassella_ASV2104	Snodgrassella_ASV2104	Presence	Absence
1858	Unclassified_Neisseriaceae_11_ASV3947	Unclassified_Neisseriaceae_11_ASV3947	Presence	Absence
1859	Limnobacter_ASV1269	Limnobacter_ASV1269	Presence	Absence
1860	Polynucleobacter_ASV1706	Polynucleobacter_ASV1706	Presence	Absence
1861	Unclassified_Alcaligenaceae_3_ASV2538	Unclassified_Alcaligenaceae_3_ASV2538	Presence	Absence
1862	Castellaniella_ASV496	Castellaniella_ASV496	Presence	Absence
1863	Pusillimonas_ASV1795	Pusillimonas_ASV1795	Presence	Absence
1864	Pusillimonas_ASV1796	Pusillimonas_ASV1796	Presence	Absence
1865	Unclassified_Alcaligenaceae_5_ASV2540	Unclassified_Alcaligenaceae_5_ASV2540	Presence	Absence
1866	Alcaligenes_ASV108	Alcaligenes_ASV108	Presence	Absence
1867	Achromobacter_ASV41	Achromobacter_ASV41	Presence	Absence
1868	Unclassified_Alcaligenaceae_2_ASV2537	Unclassified_Alcaligenaceae_2_ASV2537	Presence	Absence
1869	GKS98_freshwater_group_ASV1019	GKS98_freshwater_group_ASV1019	Presence	Absence
1870	Unclassified_Hydrogenophilaceae_4_ASV3624	Unclassified_Hydrogenophilaceae_4_ASV3624	Presence	Absence
1871	Unclassified_Hydrogenophilaceae_3_ASV3623	Unclassified_Hydrogenophilaceae_3_ASV3623	Presence	Absence
1872	Unclassified_Hydrogenophilaceae_1_ASV3621	Unclassified_Hydrogenophilaceae_1_ASV3621	Presence	Absence
1873	Noviherbaspirillum_ASV1508	Noviherbaspirillum_ASV1508	Presence	Absence
1874	Unclassified_Burkholderiaceae_3_ASV2957	Unclassified_Burkholderiaceae_3_ASV2957	Presence	Absence
1875	Lautropia_ASV1191	Lautropia_ASV1191	Presence	Absence
1876	Lautropia_ASV1190	Lautropia_ASV1190	Presence	Absence
1877	Nitrosomonas_ASV1483	Nitrosomonas_ASV1483	Presence	Absence
1878	Nitrosomonas_ASV1484	Nitrosomonas_ASV1484	Presence	Absence
1879	Nitrosomonas_ASV1482	Nitrosomonas_ASV1482	Presence	Absence
1880	Nitrosospira_ASV1485	Nitrosospira_ASV1485	Presence	Absence
1881	Salinisphaera_ASV2019	Salinisphaera_ASV2019	Presence	Absence
1882	Salinisphaera_ASV2020	Salinisphaera_ASV2020	Presence	Absence
1883	Salinisphaera_ASV2011	Salinisphaera_ASV2011	Presence	Absence
1884	Salinisphaera_ASV2016	Salinisphaera_ASV2016	Presence	Absence
1885	Salinisphaera_ASV2017	Salinisphaera_ASV2017	Presence	Absence
1886	Salinisphaera_ASV1995	Salinisphaera_ASV1995	Presence	Absence
1887	Salinisphaera_ASV2012	Salinisphaera_ASV2012	Presence	Absence
1888	Salinisphaera_ASV1989	Salinisphaera_ASV1989	Presence	Absence
1889	Salinisphaera_ASV2009	Salinisphaera_ASV2009	Presence	Absence
1890	Salinisphaera_ASV1988	Salinisphaera_ASV1988	Presence	Absence
1891	Salinisphaera_ASV2000	Salinisphaera_ASV2000	Presence	Absence
1892	Salinisphaera_ASV1999	Salinisphaera_ASV1999	Presence	Absence
1893	Salinisphaera_ASV1997	Salinisphaera_ASV1997	Presence	Absence
1894	Salinisphaera_ASV2018	Salinisphaera_ASV2018	Presence	Absence
1895	Salinisphaera_ASV1994	Salinisphaera_ASV1994	Presence	Absence
1896	Salinisphaera_ASV2021	Salinisphaera_ASV2021	Presence	Absence
1897	Salinisphaera_ASV2006	Salinisphaera_ASV2006	Presence	Absence
1898	Unknown_Family_Gammaproteobacteria_Incertae_Sedis_16_ASV5010	Unknown_Family_Gammaproteobacteria_Incertae_Sedis_16_ASV5010	Presence	Absence
1899	Desulfosarcina_ASV795	Desulfosarcina_ASV795	Presence	Absence
1900	Desulfosarcina_ASV797	Desulfosarcina_ASV797	Presence	Absence
1901	Desulfosarcina_ASV794	Desulfosarcina_ASV794	Presence	Absence
1902	Unclassified_Desulfococcaceae_8_ASV3264	Unclassified_Desulfococcaceae_8_ASV3264	Presence	Absence
1903	Unclassified_Desulfosarcinaceae_5_ASV3273	Unclassified_Desulfosarcinaceae_5_ASV3273	Presence	Absence
1904	Unclassified_Desulfovibrionaceae_9_ASV3290	Unclassified_Desulfovibrionaceae_9_ASV3290	Presence	Absence
1905	Unclassified_Desulfosarcinaceae_8_ASV3276	Unclassified_Desulfosarcinaceae_8_ASV3276	Presence	Absence
1906	Desulfobacterium_ASV773	Desulfobacterium_ASV773	Presence	Absence
1907	Unclassified_Desulfobacteraceae_1_ASV3232	Unclassified_Desulfobacteraceae_1_ASV3232	Presence	Absence
1908	Desulfobacter_ASV771	Desulfobacter_ASV771	Presence	Absence
1909	Desulfobacter_ASV772	Desulfobacter_ASV772	Presence	Absence
1910	Desulfotignum_ASV799	Desulfotignum_ASV799	Presence	Absence
1911	Unclassified_Desulfosarcinaceae_2_ASV3270	Unclassified_Desulfosarcinaceae_2_ASV3270	Presence	Absence
1912	Unclassified_Desulfosarcinaceae_10_ASV3267	Unclassified_Desulfosarcinaceae_10_ASV3267	Presence	Absence
1913	Unclassified_Desulfovibrionaceae_10_ASV3279	Unclassified_Desulfovibrionaceae_10_ASV3279	Presence	Absence
1914	Unclassified_Desulfovibrionaceae_5_ASV3286	Unclassified_Desulfovibrionaceae_5_ASV3286	Presence	Absence
1915	Unclassified_Desulfovibrionaceae_4_ASV3285	Unclassified_Desulfovibrionaceae_4_ASV3285	Presence	Absence
1916	Unclassified_Desulfovibrionaceae_3_ASV3284	Unclassified_Desulfovibrionaceae_3_ASV3284	Presence	Absence
1917	Desulfatitalea_ASV766	Desulfatitalea_ASV766	Presence	Absence
1918	Unclassified_Desulfobacterales_4_ASV3236	Unclassified_Desulfobacterales_4_ASV3236	Presence	Absence
1919	Unclassified_Desulfovibrionaceae_8_ASV3289	Unclassified_Desulfovibrionaceae_8_ASV3289	Presence	Absence
1920	Unclassified_Desulfococcaceae_9_ASV3265	Unclassified_Desulfococcaceae_9_ASV3265	Presence	Absence
1921	Unclassified_Desulfococcaceae_4_ASV3260	Unclassified_Desulfococcaceae_4_ASV3260	Presence	Absence
1922	Unclassified_Desulfococcaceae_6_ASV3262	Unclassified_Desulfococcaceae_6_ASV3262	Presence	Absence
1923	Unclassified_Desulfococcaceae_7_ASV3263	Unclassified_Desulfococcaceae_7_ASV3263	Presence	Absence
1924	Unclassified_Desulfococcaceae_3_ASV3259	Unclassified_Desulfococcaceae_3_ASV3259	Presence	Absence
1925	Desulfosalsimonas_ASV793	Desulfosalsimonas_ASV793	Presence	Absence
1926	Unclassified_Desulfosarcinaceae_4_ASV3272	Unclassified_Desulfosarcinaceae_4_ASV3272	Presence	Absence
1927	Unclassified_Desulfosarcinaceae_1_ASV3266	Unclassified_Desulfosarcinaceae_1_ASV3266	Presence	Absence
1928	Sva0081_sediment_group_ASV2290	Sva0081_sediment_group_ASV2290	Presence	Absence
1929	Sva0081_sediment_group_ASV2291	Sva0081_sediment_group_ASV2291	Presence	Absence
1930	Unclassified_Desulfovibrionaceae_13_ASV3282	Unclassified_Desulfovibrionaceae_13_ASV3282	Presence	Absence
1931	Unclassified_Desulfococcaceae_1_ASV3257	Unclassified_Desulfococcaceae_1_ASV3257	Presence	Absence
1932	Unclassified_Desulfococcaceae_2_ASV3258	Unclassified_Desulfococcaceae_2_ASV3258	Presence	Absence
1933	Desulfonema_ASV790	Desulfonema_ASV790	Presence	Absence
1934	Unclassified_Desulfococcaceae_5_ASV3261	Unclassified_Desulfococcaceae_5_ASV3261	Presence	Absence
1935	SEEP-SRB1_ASV2065	SEEP-SRB1_ASV2065	Presence	Absence
1936	Sva0081_sediment_group_ASV2294	Sva0081_sediment_group_ASV2294	Presence	Absence
1937	Sva0081_sediment_group_ASV2288	Sva0081_sediment_group_ASV2288	Presence	Absence
1938	Sva0081_sediment_group_ASV2295	Sva0081_sediment_group_ASV2295	Presence	Absence
1939	Sva0081_sediment_group_ASV2285	Sva0081_sediment_group_ASV2285	Presence	Absence
1940	Sva0081_sediment_group_ASV2299	Sva0081_sediment_group_ASV2299	Presence	Absence
1941	Unclassified_Desulfovibrionaceae_7_ASV3288	Unclassified_Desulfovibrionaceae_7_ASV3288	Presence	Absence
1942	Sva0081_sediment_group_ASV2284	Sva0081_sediment_group_ASV2284	Presence	Absence
1943	Sva0081_sediment_group_ASV2292	Sva0081_sediment_group_ASV2292	Presence	Absence
1944	Sva0081_sediment_group_ASV2286	Sva0081_sediment_group_ASV2286	Presence	Absence
1945	SEEP-SRB1_ASV2066	SEEP-SRB1_ASV2066	Presence	Absence
1946	Unclassified_Desulfovibrionaceae_12_ASV3281	Unclassified_Desulfovibrionaceae_12_ASV3281	Presence	Absence
1947	Desulfocella_ASV779	Desulfocella_ASV779	Presence	Absence
1948	Desulfocella_ASV780	Desulfocella_ASV780	Presence	Absence
1949	Desulfocella_ASV776	Desulfocella_ASV776	Presence	Absence
1950	Unclassified_Gammaproteobacteria_43_ASV3499	Unclassified_Gammaproteobacteria_43_ASV3499	Presence	Absence
1951	Unclassified_Gammaproteobacteria_40_ASV3496	Unclassified_Gammaproteobacteria_40_ASV3496	Presence	Absence
1952	Unclassified_Chromatiaceae_8_ASV3068	Unclassified_Chromatiaceae_8_ASV3068	Presence	Absence
1953	Marinicella_ASV1305	Marinicella_ASV1305	Presence	Absence
1954	Marinicella_ASV1303	Marinicella_ASV1303	Presence	Absence
1955	Unclassified_Gammaproteobacteria_56_ASV3513	Unclassified_Gammaproteobacteria_56_ASV3513	Presence	Absence
1956	Unclassified_Thiotrichaceae_2_ASV4860	Unclassified_Thiotrichaceae_2_ASV4860	Presence	Absence
1957	Dokdonella_ASV845	Dokdonella_ASV845	Presence	Absence
1958	Unclassified_Xanthomonadaceae_3_ASV4964	Unclassified_Xanthomonadaceae_3_ASV4964	Presence	Absence
1959	Xanthomonas_ASV5110	Xanthomonas_ASV5110	Presence	Absence
1960	Arenimonas_ASV212	Arenimonas_ASV212	Presence	Absence
1961	Arenimonas_ASV213	Arenimonas_ASV213	Presence	Absence
1962	Luteimonas_ASV1280	Luteimonas_ASV1280	Presence	Absence
1963	Unclassified_Xanthomonadaceae_4_ASV4965	Unclassified_Xanthomonadaceae_4_ASV4965	Presence	Absence
1964	Thermomonas_ASV2351	Thermomonas_ASV2351	Presence	Absence
1965	Stenotrophomonas_ASV2228	Stenotrophomonas_ASV2228	Presence	Absence
1966	Stenotrophomonas_ASV2225	Stenotrophomonas_ASV2225	Presence	Absence
1967	Stenotrophomonas_ASV2223	Stenotrophomonas_ASV2223	Presence	Absence
1968	Stenotrophomonas_ASV2230	Stenotrophomonas_ASV2230	Presence	Absence
1969	Stenotrophomonas_ASV2227	Stenotrophomonas_ASV2227	Presence	Absence
1970	Xanthomonas_ASV5109	Xanthomonas_ASV5109	Presence	Absence
1971	Unclassified_Xanthomonadaceae_1_ASV4962	Unclassified_Xanthomonadaceae_1_ASV4962	Presence	Absence
1972	Arenimonas_ASV214	Arenimonas_ASV214	Presence	Absence
1973	Arenimonas_ASV211	Arenimonas_ASV211	Presence	Absence
1974	Luteibacter_ASV1277	Luteibacter_ASV1277	Presence	Absence
1975	Luteibacter_ASV1279	Luteibacter_ASV1279	Presence	Absence
1976	Unclassified_Rhodanobacteraceae_4_ASV4343	Unclassified_Rhodanobacteraceae_4_ASV4343	Presence	Absence
1977	Unclassified_Rhodanobacteraceae_1_ASV4340	Unclassified_Rhodanobacteraceae_1_ASV4340	Presence	Absence
1978	Rhodanobacter_ASV1820	Rhodanobacter_ASV1820	Presence	Absence
1979	Rhodanobacter_ASV1821	Rhodanobacter_ASV1821	Presence	Absence
1980	Rhodanobacter_ASV1817	Rhodanobacter_ASV1817	Presence	Absence
1981	Dyella_ASV853	Dyella_ASV853	Presence	Absence
1982	Unclassified_Rhodanobacteraceae_2_ASV4341	Unclassified_Rhodanobacteraceae_2_ASV4341	Presence	Absence
1983	Rhodanobacter_ASV1818	Rhodanobacter_ASV1818	Presence	Absence
1984	Unclassified_Rhodanobacteraceae_3_ASV4342	Unclassified_Rhodanobacteraceae_3_ASV4342	Presence	Absence
1985	Methylomicrobium_ASV1382	Methylomicrobium_ASV1382	Presence	Absence
1986	Methylomicrobium_ASV1383	Methylomicrobium_ASV1383	Presence	Absence
1987	Alcanivorax_ASV114	Alcanivorax_ASV114	Presence	Absence
1988	Unclassified_Gammaproteobacteria_19_ASV3472	Unclassified_Gammaproteobacteria_19_ASV3472	Presence	Absence
1989	Unclassified_Gammaproteobacteria_14_ASV3467	Unclassified_Gammaproteobacteria_14_ASV3467	Presence	Absence
1990	Unclassified_Gammaproteobacteria_8_ASV3534	Unclassified_Gammaproteobacteria_8_ASV3534	Presence	Absence
1991	Unclassified_Gammaproteobacteria_52_ASV3509	Unclassified_Gammaproteobacteria_52_ASV3509	Presence	Absence
1992	Woeseia_ASV5096	Woeseia_ASV5096	Presence	Absence
1993	Unclassified_Gammaproteobacteria_10_ASV3463	Unclassified_Gammaproteobacteria_10_ASV3463	Presence	Absence
1994	Unclassified_HOC36_1_ASV3610	Unclassified_HOC36_1_ASV3610	Presence	Absence
1995	Unclassified_Gammaproteobacteria_57_ASV3514	Unclassified_Gammaproteobacteria_57_ASV3514	Presence	Absence
1996	Unclassified_Gammaproteobacteria_32_ASV3487	Unclassified_Gammaproteobacteria_32_ASV3487	Presence	Absence
1997	Methylohalomonas_ASV1380	Methylohalomonas_ASV1380	Presence	Absence
1998	Woeseia_ASV5100	Woeseia_ASV5100	Presence	Absence
1999	Unclassified_Gammaproteobacteria_16_ASV3469	Unclassified_Gammaproteobacteria_16_ASV3469	Presence	Absence
[truncated: 530 more rows]
