# Supplementary material
Source: Research Square preprint supplement (doi:10.21203/rs.3.rs-9440532/v1)
Supplement: Supplementary file 1 [file a08dce282e0e5de35fa63ebe.docx]

**Host-microbiota association in a migratory species: Constitutive humoral immunity in the partially migratory bat *Leptonycteris yerbabuenae* is linked to the gut microbiota in a sex-specific manner.**

David Alfonso Rivera-Ruiz1*, José Juan Flores-Martínez2, Carlos Rosales3, Luisa I. Falcón4, Osiris Gaona4, Marco Tulio Solano de la Cruz5 and L. Gerardo Herrera M6*

**1** Posgrado en Ciencias Biológicas, Instituto de Biología, Universidad Nacional Autónoma de México, Circuito Exterior s/n, Ciudad Universitaria, 04510, Coyoacán, Ciudad de México, México.

**2** Laboratorio de Sistemas de Información Geográfica, Departamento de Zoología, Instituto de Biología, Universidad Nacional Autónoma de México, Circuito Exterior s/n, Ciudad Universitaria, 04510, Coyoacán, Ciudad de México, México

**3** Departamento de Inmunología, Instituto de Investigaciones Biomédicas, Universidad Nacional Autónoma de México, Circuito Exterior s/n, Ciudad Universitaria, 04510, Coyoacán, Ciudad de México, México

**4** Laboratorio de Ecología Bacteriana, Instituto de Ecología-Unidad Mérida, Universidad Nacional Autónoma de México, Tablaje Catastral N°6998, Carretera Mérida-Tetiz km 4.5, 97357, Municipio de Ucú, Yucatán, 97357, México

5 Unidad de Genética Molecular, Instituto de Ecología, Universidad Nacional Autónoma de México, Circuito Exterior s/n, Ciudad Universitaria, Coyoacán, 04510, Ciudad de México, México

**6** Estación de Biología Chamela, Instituto de Biología, Universidad Nacional Autónoma de México, Carretera Barra de Navidad - Pto. Vallarta km. 59, 47152, Chamela, Jalisco, México

*Corresponding authors

E-mail: [david.rivera@ecologia.unam.mx](mailto:david.rivera@ecologia.unam.mx) (DARR)

E-mail: [gherrera@ib.unam.mx](mailto:gherrera@ib.unam.mx) (LGHM)


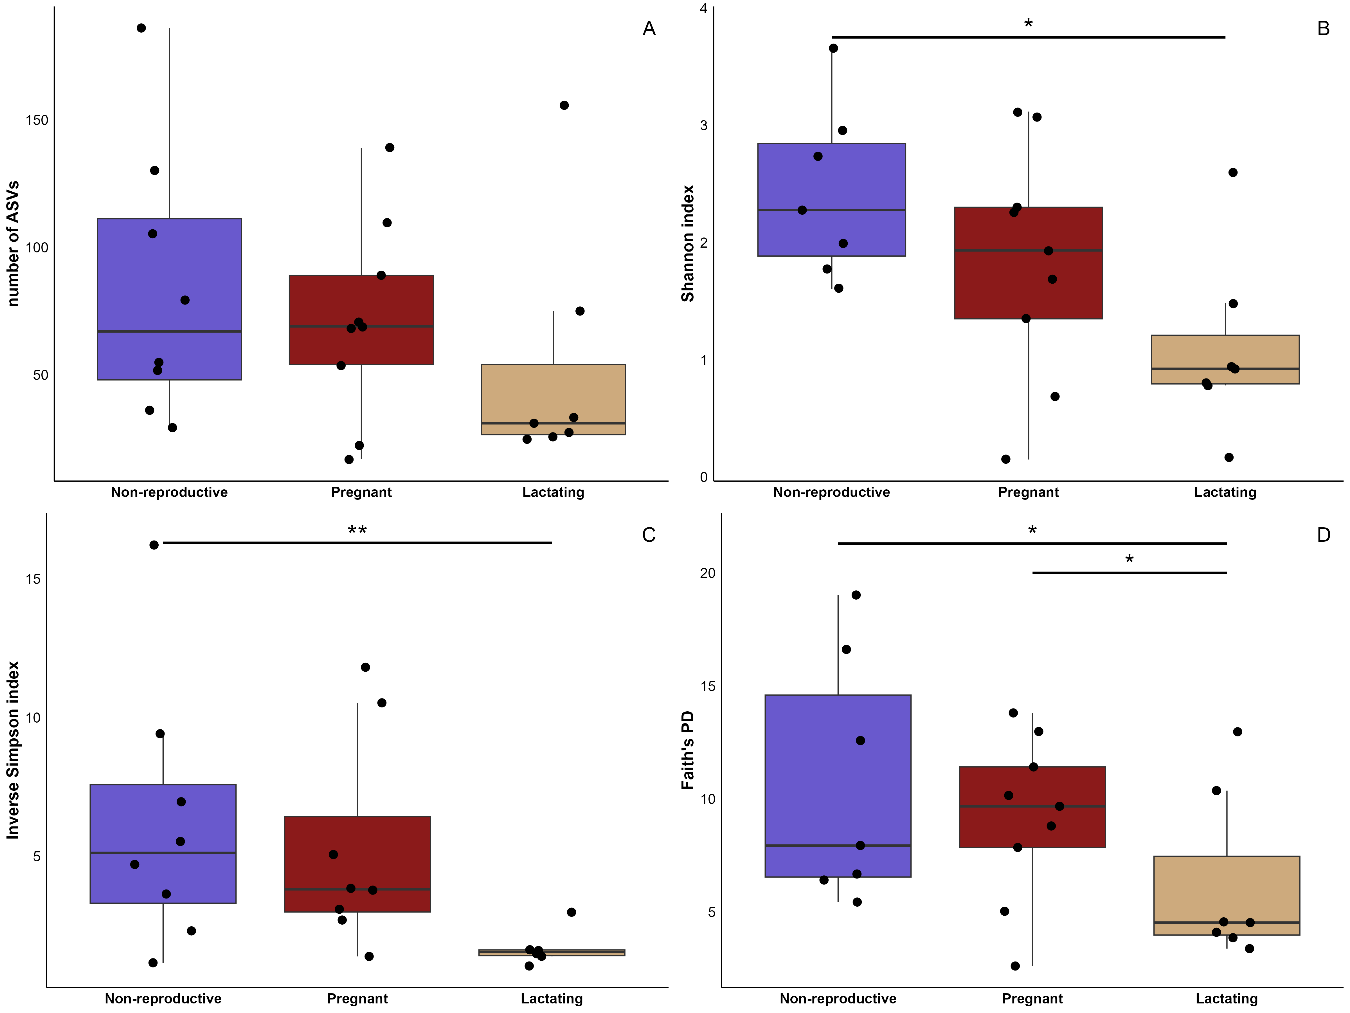


**Supplementary Fig 1**. Fecal microbiota alpha diversity in adult females of Leptonycteris yerbabuenae between different reproductive stages. Each point represents one individual. A) number of ASVs, B) Shannon's index, C) Simpson's inverse index, and D) Faith's PD index. Values are medians (squares), interquartile ranges (boxes), and 5–95% percentiles (whiskers). Significant differences in Tukey HSD pairwise comparisons were calculated (p ≤ 0.05 *, p ≤ 0.01 **) when generalized linear models were significant. The observed number of ASVs was not significantly distinct between female cohorts (F2,21 = 1.168, p = 0.330, n=24).

**Supplementary Table 1.** Results of Tukey’s HSD post hoc comparisons for fecal microbiota alpha diversity (log transformed except Shannon index) of females of Leptonycteris yerbabuenae in different reproductive stages.

| **Data subset / Comparison** | **ΔMlog** | **95% CI [LL, UL]** | **Adj. p** |
| --- | --- | --- | --- |
| **Shannon index (ΔM)** | | | |
| Non-reproductive vs Lactating | 1.328 | [0.169, 2.487] | 0.023 |
| Pregnant vs Lactating | 0.739 | [-0.353, 1.832] | 0.225 |
| Pregnant vs Non-reproductive | -0.589 | [-1.681, 0.503] | 0.377 |
| **Inverse Simpson index** | | | |
| Non-reproductive vs Lactating | 1.172 | [0.273, 2.071] | 0.009 |
| Pregnant vs Lactating | 0.698 | [-0.149, 1.545] | 0.118 |
| Pregnant vs Non-reproductive | -0.474 | [-1.321, 0.373] | 0.351 |
| **Faith's PD index** | | | |
| Non-reproductive vs Lactating | 0.703 | [0.157, 1.248] | 0.010 |
| Pregnant vs Lactating | 0.700 | [0.154, 1.246] | 0.010 |
| Pregnant vs Non-reproductive | -0.002 | [-0.507, 0.502] | 0.999 |

Note: Shannon index was not log trasnformed, thus, ΔMlog = ΔM. ΔM and ΔMlogis calculated as Mgroup1 - Mgroup2. All statistical results derived from Tukey’s HSD post-hoc test from significant general linear model.


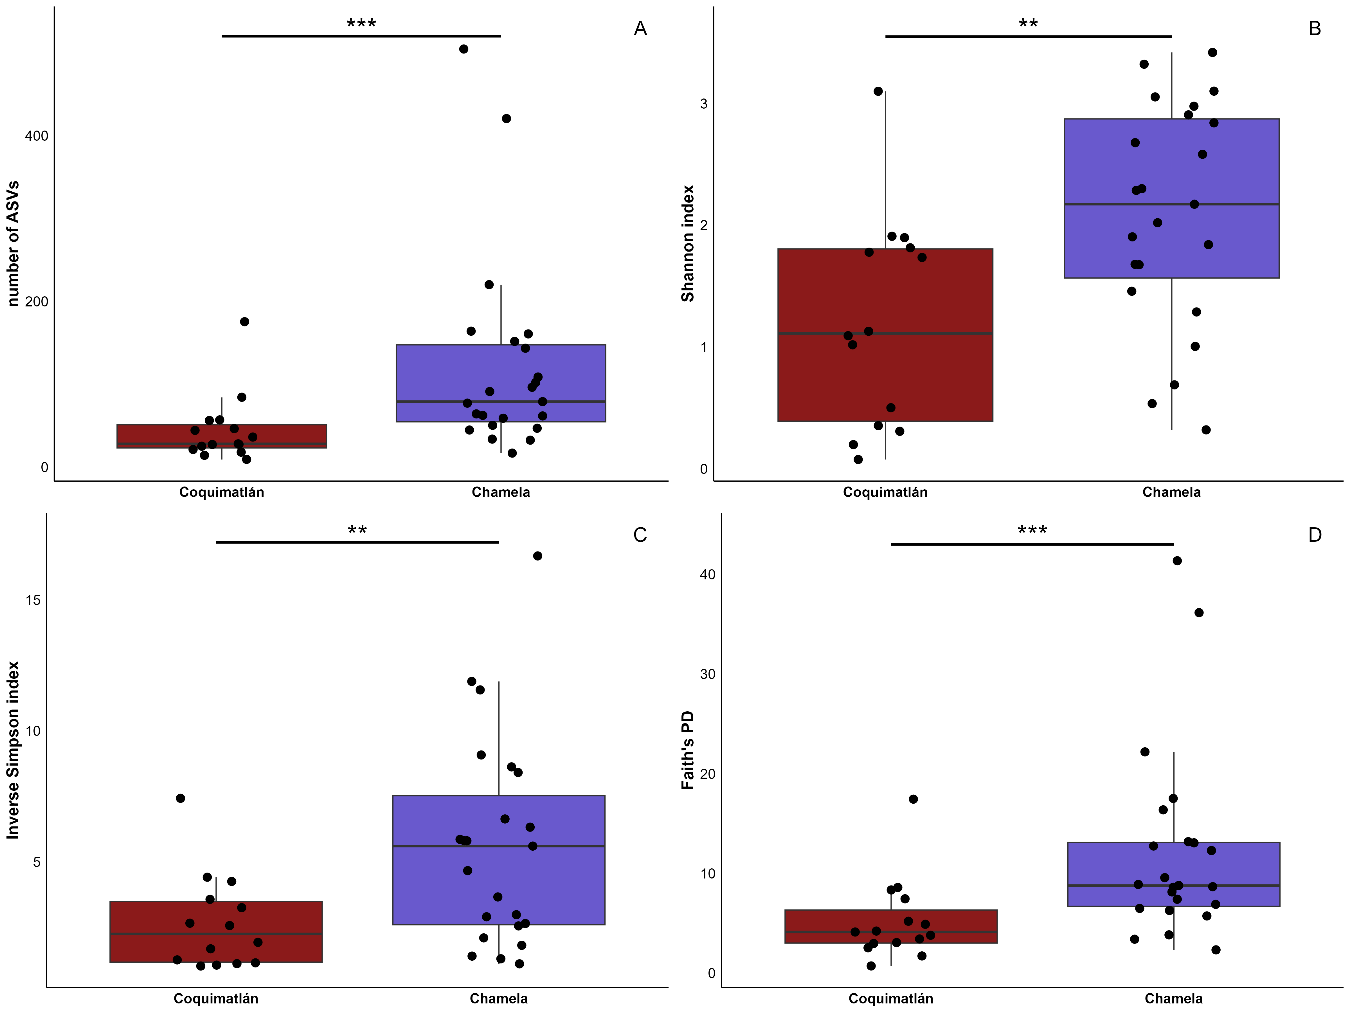


Supplementary Fig 2. Fecal microbiota alpha diversity in adult males of Leptonycteris yerbabuenae at different regions in West-central Mexico. Each point represents one individual. A) the observed number of ASVs, B) Shannon's index, C) Simpson's inverse index, and D) Faith's PD index. Values are medians (squares), interquartile ranges (boxes), and 5–95% percentiles (whiskers). Significant differences of the generalized linear models are shown (p ≤ 0.05 *, p ≤ 0.01 **, p ≤ 0.001 ***). The observed number of ASVs (F1,36 = 13.69, p < 0.001, n=38), the Shannon index (F1,35 = 9.598, p = 0.003, n=37), the inverse Simpson index (F1,35 = 8.019, p = 0.007, n=37) and the Faith's PD index (F1,36 = 13.151, p < 0.001, n=38), were significantly different between sites.


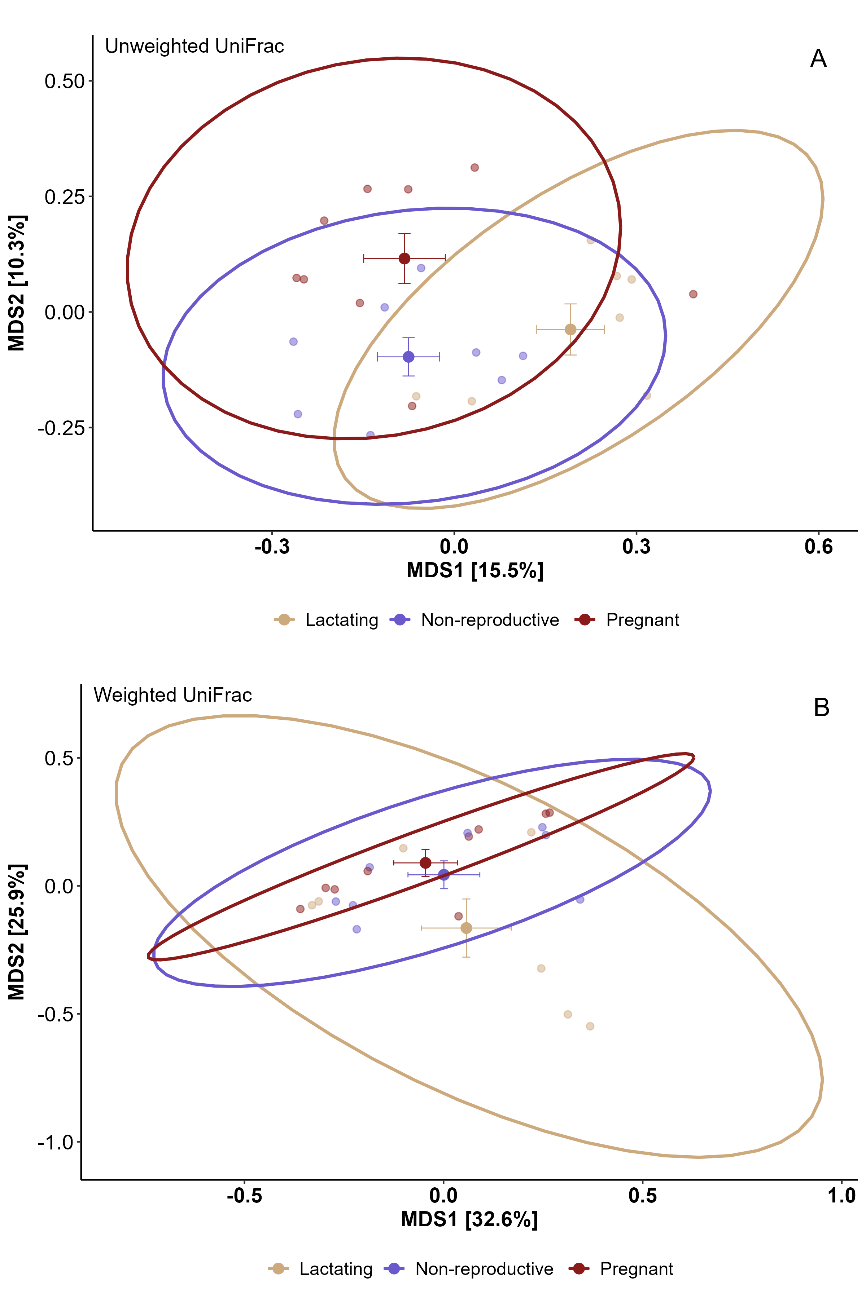


Supplementary Fig 3. Multidimensional scaling (MDS) of unweighted and weighted UniFrac distances of fecal microbiota in females of Leptonycteris yerbabuenae at different reproductive stages. The centroid and respective standard error, ellipses and individual data for lactating, non-reproductive and pregnant females are indicated in different colors. A) Unweighted UniFrac distance was significantly affected by reproductive status (PERMANOVA: R2 = 0.156, F2,21= 1.95, p < 0.001; see Supplementary Table 2 for pairwise comparisons). No significant differences in multivariate dispersion of unweighted UniFrac distance were found among groups (PERMDISP: F = 0.370, p = 0.694), which confirms that the microbial community compositions of the different female cohorts are not driven by unequal group variances. B) Weighted UniFrac distance did not differ significantly among groups (PERMANOVA: R2 = 0.114, F2,21= 1.352, p = 0.181). Multivariate dispersion of weighted UniFrac distance was also not significantly different among the reproductive groups (PERMDISP: F = 2.80, p = 0.08).

Supplementary Table 3. Pairwise PERMANOVA comparisons for unweighted UniFrac distances across females in different reproductive stages.

| **Comparison** | **d.f.** | **F** | **R2** | **Adj. p** |
| --- | --- | --- | --- | --- |
| **Unweighted UniFrac distance** | | | | |
| Non-reproductive vs Lactating | 1 | 2.053 | 0.136 | 0.006 |
| Non-reproductive vs Pregnant | 1 | 1.755 | 0.104 | 0.009 |
| Pregnant vs Lactating | 1 | 2.057 | 0.128 | 0.033 |

Note. p values were adjusted (Adj. p) using the Bonferroni correction, d.f = degree freedom.


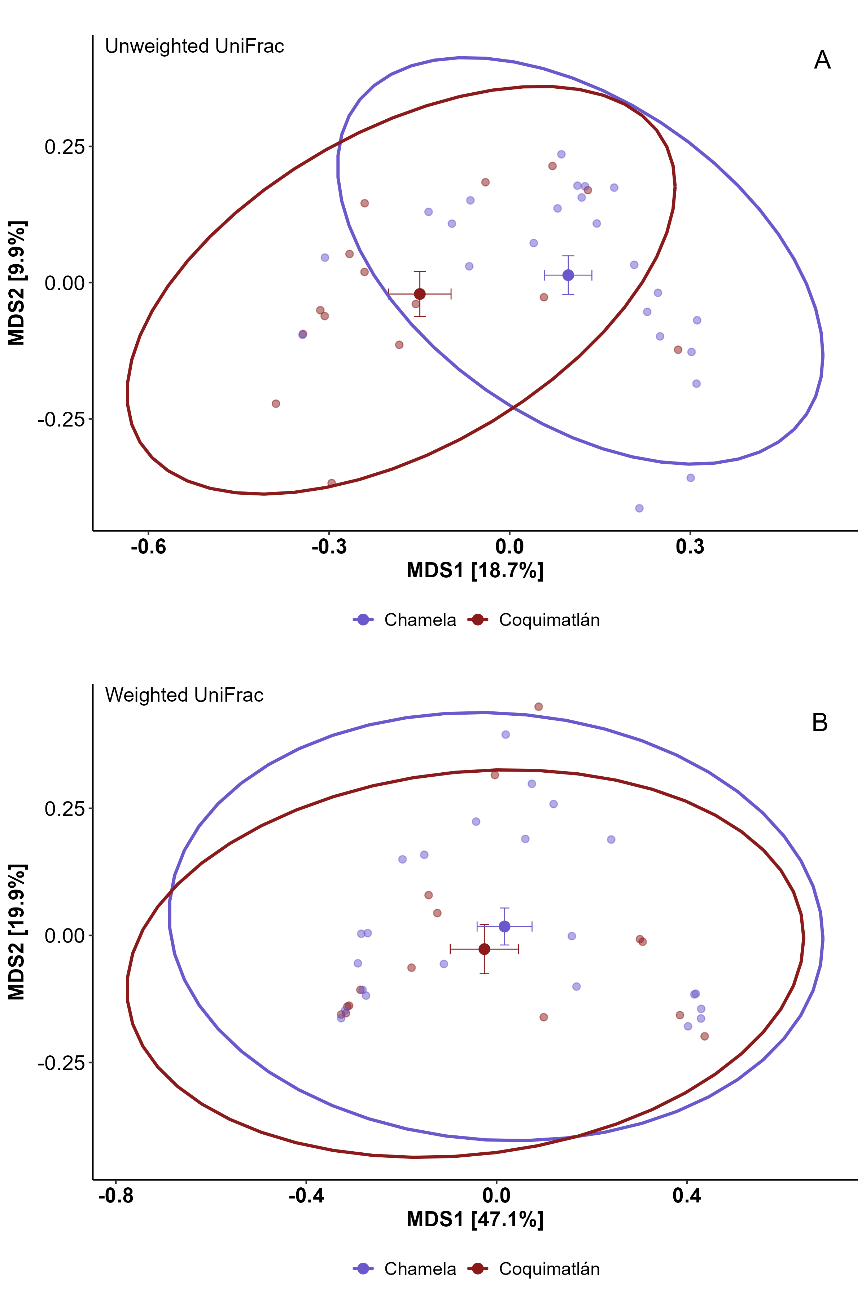


**Supplementary Fig 4.** Multidimensional scaling (MDS) of unweighted and weighted UniFrac distances of fecal microbiota in males of Leptonycteris yerbabuenae in different sites. The centroid and respective standard error, ellipses and individual data for males from Coquimatlán and Chamela are indicated in different colors. A) Unweighted UniFrac distance was significantly affected by location (PERMANOVA: R2 = 0.067, F1,36= 2.61, p = 0.001). No significant differences in multivariate dispersion of unweighted UniFrac distances were found among groups (PERMDISP: F = 8x10-3, p = 0.931), which confirms that the microbial community compositions of males in different locations are not driven by unequal group variances. B) Weighted UniFrac distance did not differ significantly among groups (PERMANOVA: R2 = 0.020, F1,36 = 0.76, p = 0.534). Multivariate dispersion of weighted UniFrac distances were also not significantly different among males in different locations (PERMDISP: F = 0.38, p = 0.539).


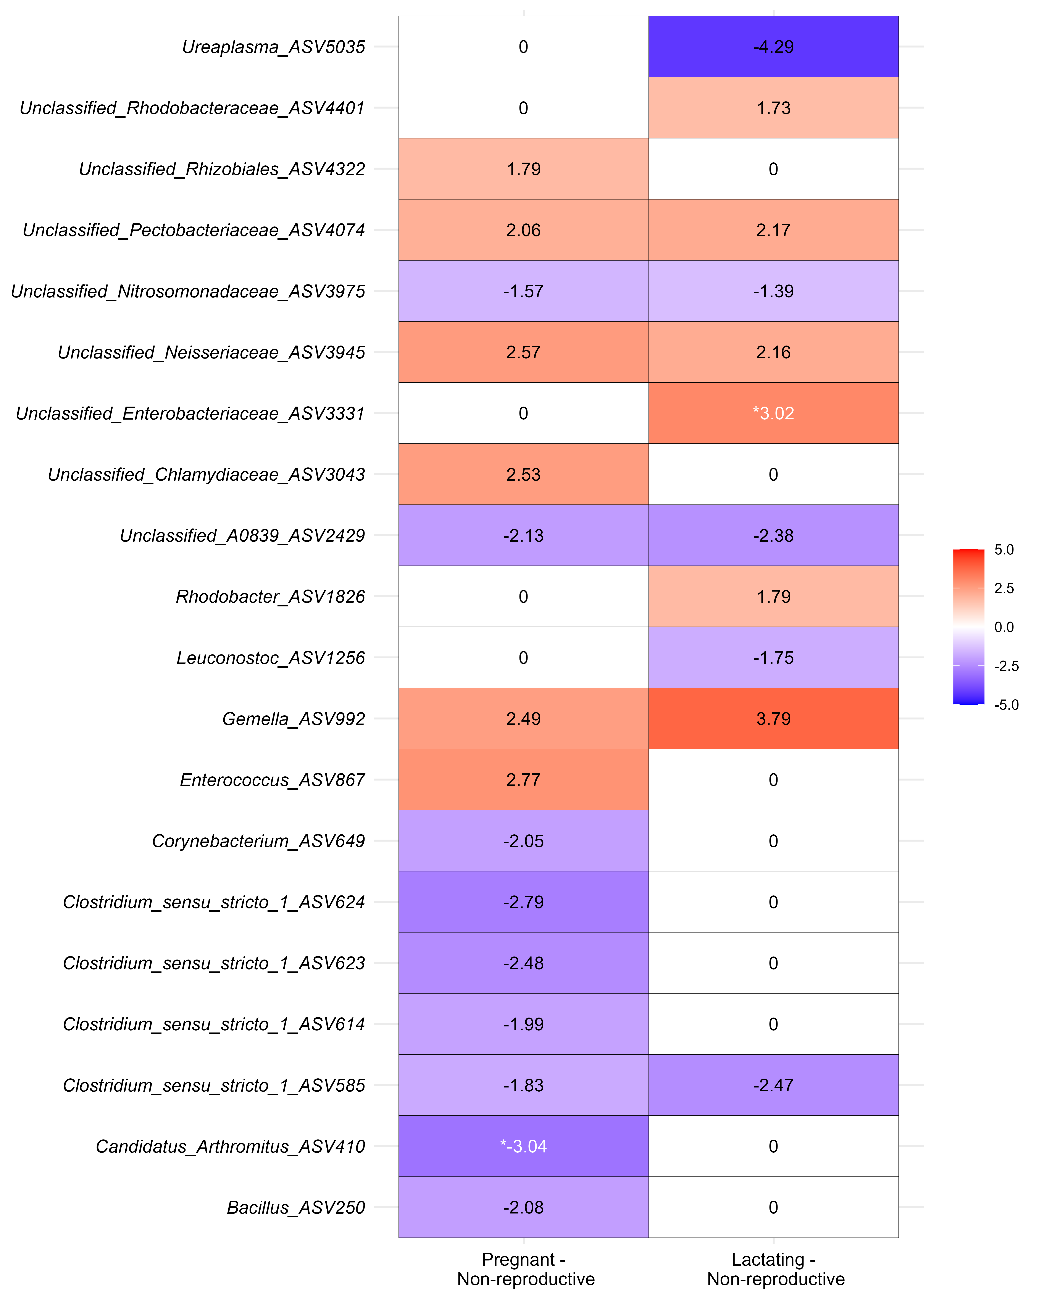


**Supplementary Fig 5.** ANCOMBC2 differential abundance analysis showing the fecal ASVs that differ between non-reproductive and reproductive females of Leptonycteris yerbabuenae. The taxonomic classification of fecal ASVs is shown in the Y-axis and the comparison between non-reproductive (reference group) and reproductive females is shown in the X-axis. The color of each box indicates the change of each ASV (blue indicates a decrease and red an increase) relative to the reference group. The numerical values within each box indicate the magnitude of the log change relative to the reference group. The Benjamini & Hochberg (BH) method was used to correct for multiple testing. The color of the log change number identifies the ASVs that were significant without using the multiple testing correction method (p < 0.05, black), while differentially significant ASVs after multiple testing correction are indicated in blue. ASVs with log change marked with an asterisk were significant after applying the ANCOM-BC2 sensitivity filter.


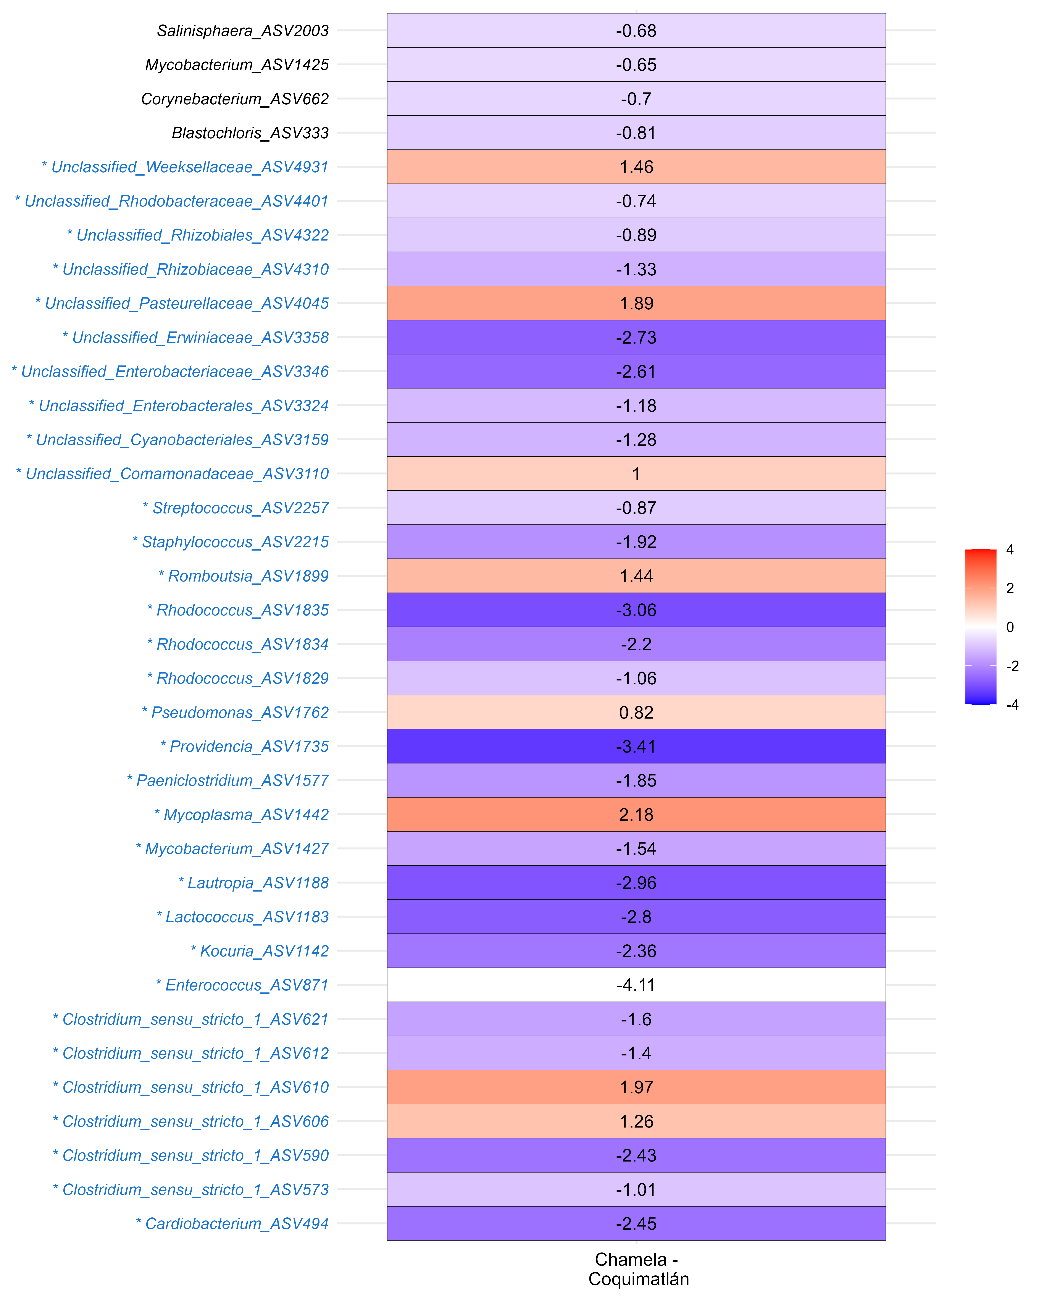


**Supplementary Fig 6.** ANCOMBC2 differential abundance analysis showing the fecal ASVs that differ between male Leptonycteris yerbabuenae from different locations in west-central Mexico. The taxonomic classification of fecal ASVs is shown in the Y-axis and the comparison between males from Coquimatlán (reference group) and Chamela is shown in the X-axis. The color of each box indicates the change of each ASV (blue indicates a decrease and red an increase) relative to the reference group. The numerical values within each box indicate the magnitude of the log change relative to the reference group. The Benjamini & Hochberg (BH) method was used to correct for multiple testing. ASVs in black were identified as significant (p < 0.05) without using the multiple testing correction method, while differentially significant ASVs after multiple testing correction are indicated in blue. ASVs marked with an asterisk were significant after applying the ANCOM-BC2 sensitivity filter.


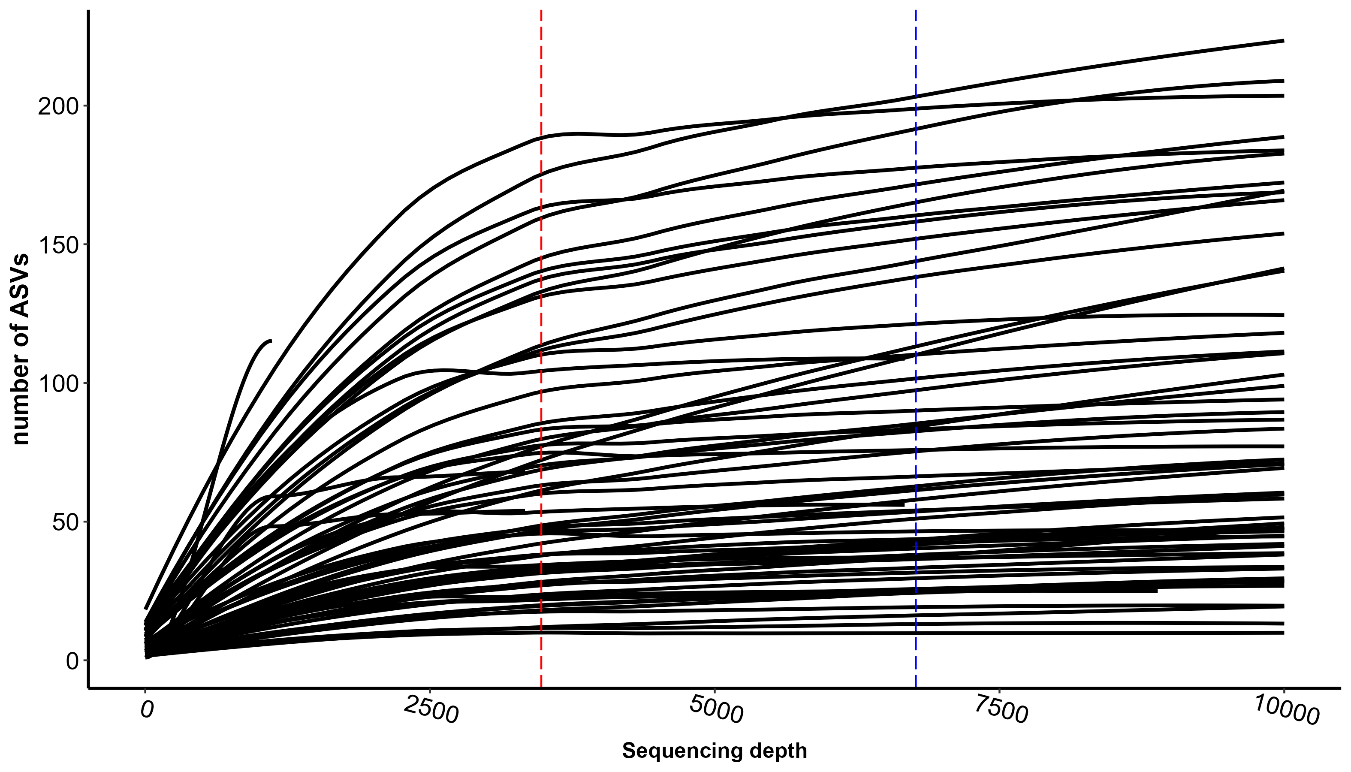


**Supplementary Fig 7.** Rarefaction curves of amplified 16S rRNA sequences in feces of adults Leptonycteris yerbabuenae. Each line represents an individual sample, where the number of ASVs observed is reported on the y-axis, and the sequencing depth on the x-axis. The vertical red line is located at a depth of 3477 reads, which represents the minimum rarefaction threshold for females. On the other hand, the minimum rarefaction threshold for males is located at a depth of 6675 reads, which is indicated by the blue line. At both thresholds, most samples have reached an asymptote regarding the appearance of new sequences. For this graph, two Chamela samples with a large number of ASVs have been omitted.


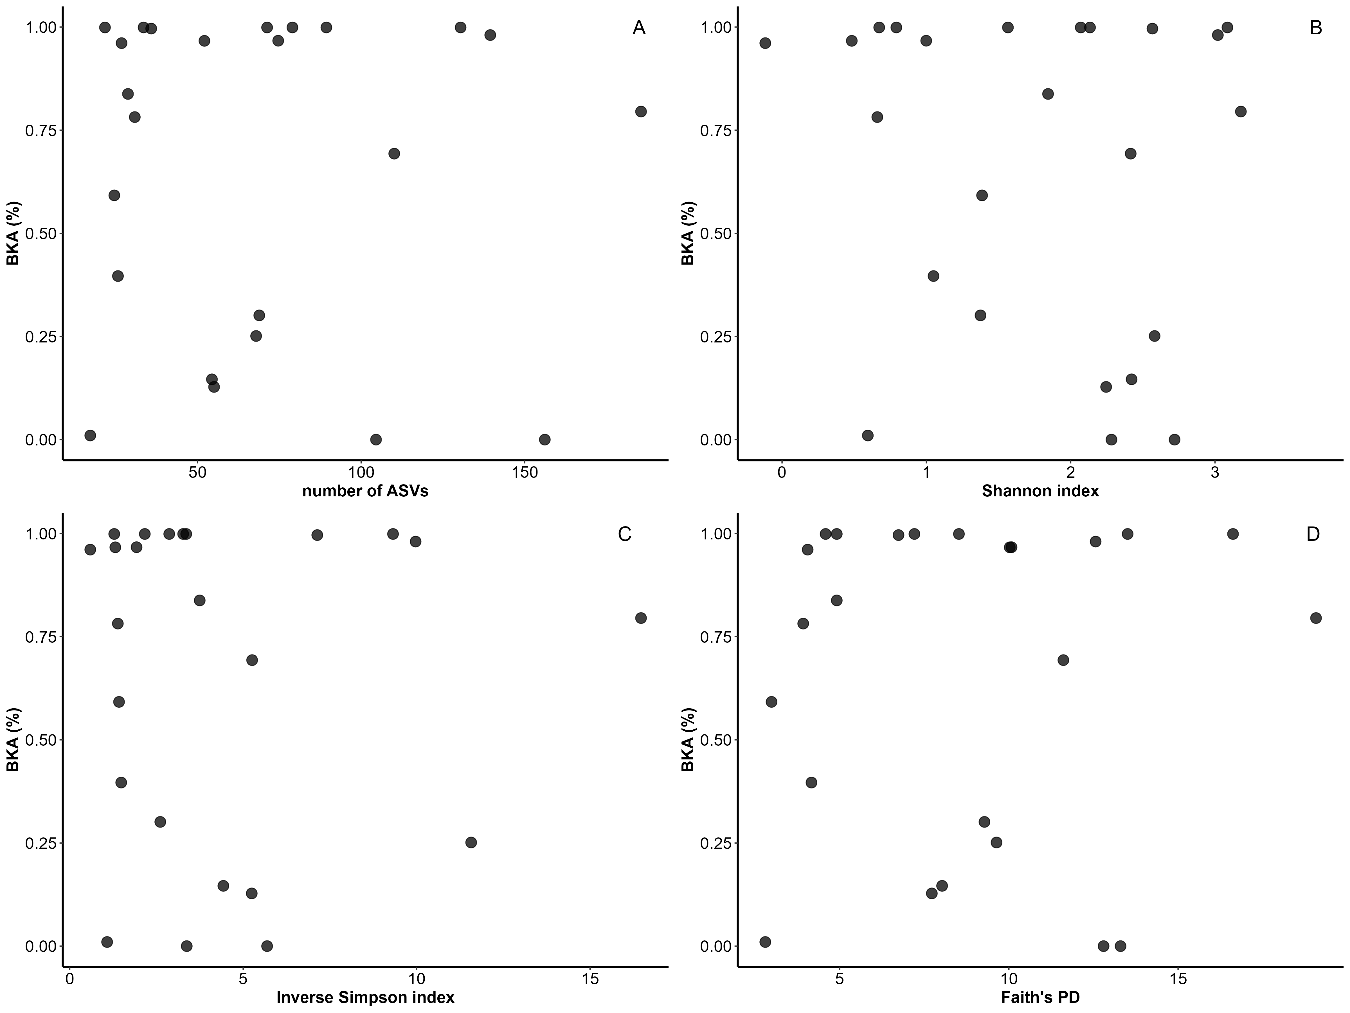


**Supplementary Fig 8.** Bacterial killing-ability of plasma (BKA) as a function of fecal microbiota alpha diversity in females of Leptonycteris yerbabuenae. Each point represents one individual. BKA as a function of A) the observed number of ASVs, B) Shannon's index, C) Simpson's inverse index, and D) Faith's PD index.

**Supplementary Table 4.** Generalized linear model results for bacterial killing-ability of plasma (BKA) as a function fecal microbiota alpha diversity in female of Leptonycteris yerbabuenae.

| **Alpha diversity metrics** | **β** | **SE** | **95% CI** | **χ2** | **d.f** | **p** | **n** |
| --- | --- | --- | --- | --- | --- | --- | --- |
| Observed number of ASVs | 0.005 | 0.007 | -0.008, 0.019 | 0.56 | 1 | 0.451 | 24 |
| Shannon index | 0.085 | 0.283 | -0.047, 0.064 | 0.08 | 1 | 0.764 | 24 |
| Inverse Simpson's index | -0.001 | 0.067 | -0.13, 0.13 | 5-4 | 1 | 0.982 | 24 |
| Faith's PD index | 0.053 | 0.062 | -0.067, 0.175 | 0.75 | 1 | 0.384 | 24 |

Note: β = estimated regression coefficients, SE = standard error, CI = confidence interval, d.f = degrees of freedom.


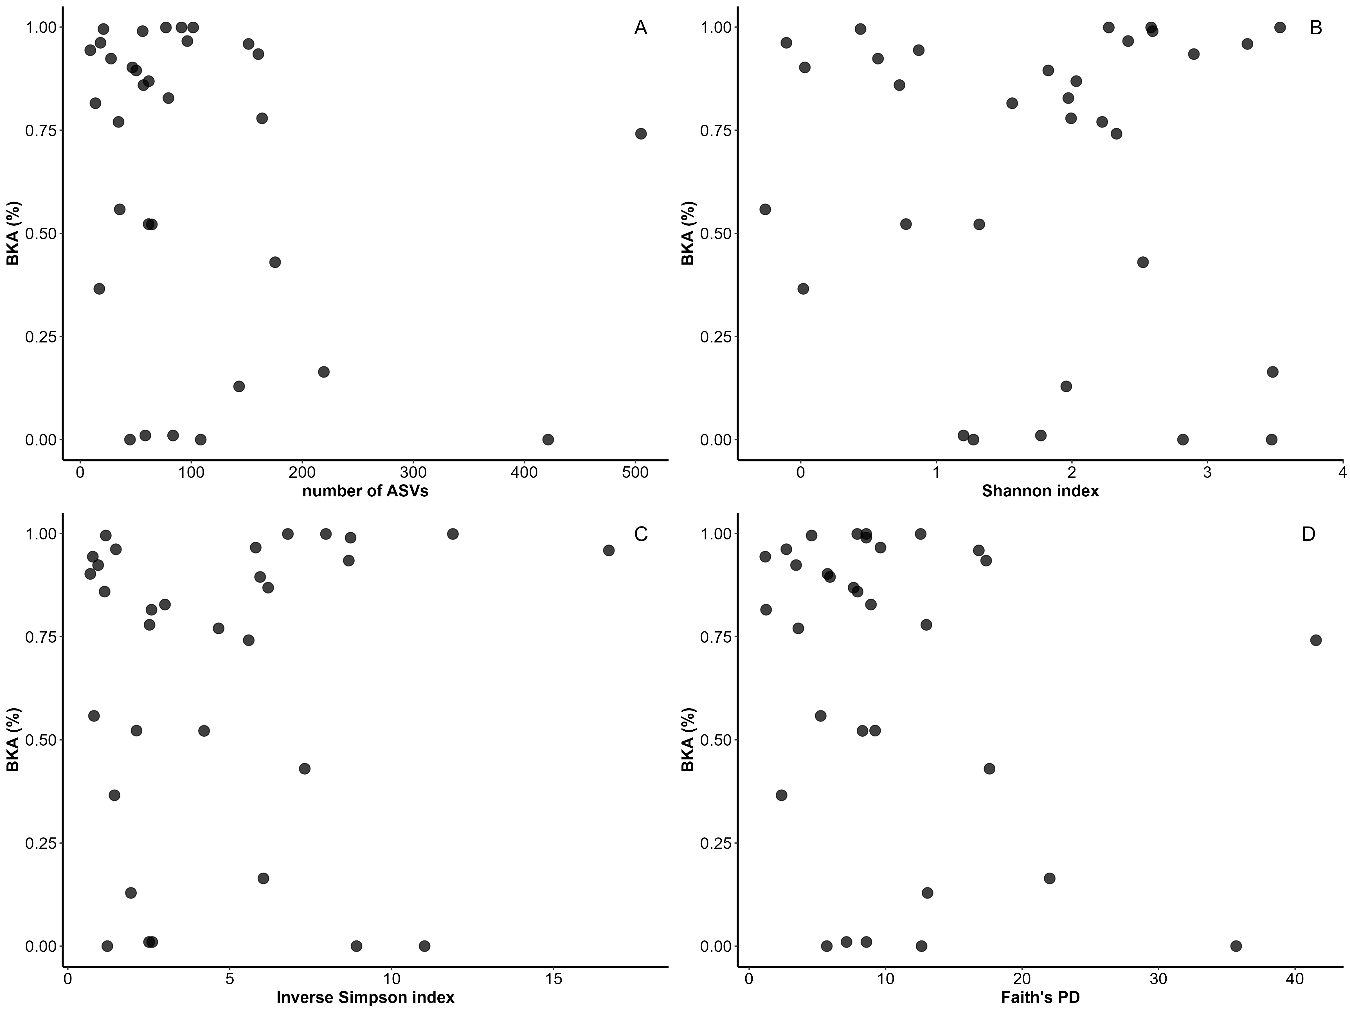


**Supplementary Fig 9**. Bacterial killing-ability of plasma (BKA) as a function of fecal microbiota alpha diversity in males of Leptonycteris yerbabuenae. Each point represents one individual. BKA as a function of A) the observed number of ASVs, B) Shannon's index, C) Simpson's inverse index, and D) Faith's PD index.

**Supplementary Table 5**. Generalized linear model results for bacterial killing-ability of plasma (BKA) as a function fecal microbiota alpha diversity in male of Leptonycteris yerbabuenae.

| **Alpha diversity metrics** | **β** | **SE** | **95% CI** | ***χ2*** | **d.f** | ***p*** | ***n*** |
| --- | --- | --- | --- | --- | --- | --- | --- |
| Observed number of ASVs | -0.001 | 0.002 | -0.006, 0.003 | 0.37 | 1 | 0.540 | 32 |
| Shannon index | 0.142 | 0.211 | -0.272, 0.556 | 0.45 | 1 | 0.501 | 32 |
| Inverse Simpson's index | 0.106 | 0.061 | -0.014, 0.226 | 2.99 | 1 | 0.083 | 32 |
| Faith's PD index | -0.014 | 0.029 | -0.071, 0.042 | 0.26 | 1 | 0.606 | 32 |

Note: β = estimated regression coefficients, SE = standard error, CI = confidence interval, d.f = degrees of freedom.


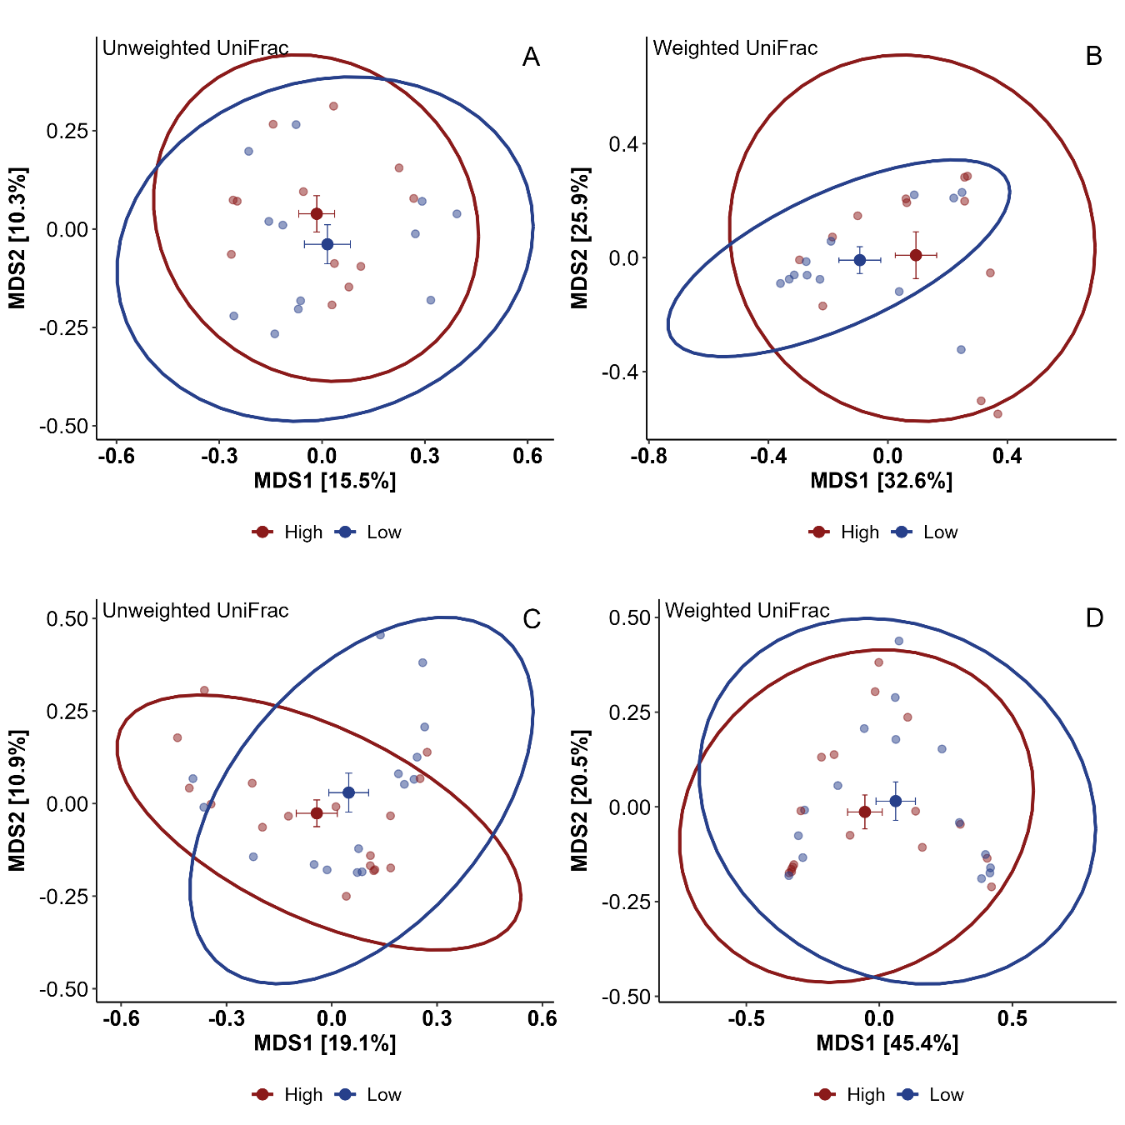


**Supplementary Fig 10.** Multidimensional scaling (MDS) of unweighted and weighted UniFrac distances of fecal microbiota in adults of Leptonycteris yerbabuenae. The centroid and respective standard error, ellipses and individual data for samples with low (blue) and high (red) bacterial killing-ability of plasma (BKA) are indicated in different colors. Upper panels show unweighted (A) and B) weighted UniFrac distances for females. Female multivariate dispersion for unweighted (PERMDISP: F = 0.98, p = 0.333) and weighted (PERMDISP: F = 0.81, p = 0.377) UniFrac distances were not significantly different among groups. Lower panels show unweighted (C) and weighted (D) UniFrac distances for males. Male multivariate dispersion for unweighted (PERMDISP: F = 0.41, p = 0. 529) and weighted (PERMDISP: F = 2.37, p = 0. 136) UniFrac distances were not significantly different among groups.

**Supplementary Table 6.** PERMANOVA results for weighted and unweighted UniFrac distances in male and females of Leptonycteris yerbabuenae with high and low bacterial killing-ability of plasma (BKA).

| **Beta diversity metric** | **Sex** | ***R2*** | ***F*** | ***p*** | ***n*** |
| --- | --- | --- | --- | --- | --- |
| Unweighted UniFrac distance | Female | 0.036 | 0.912 | 0.595 | 24 |
| Weighted UniFrac distance | Female | 0.064 | 1.579 | 0.150 | 24 |
| Unweighted UniFrac distance | Male | 0.028 | 0.887 | 0.589 | 32 |
| Weighted UniFrac distance | Male | 0.037 | 1.151 | 0.298 | 32 |


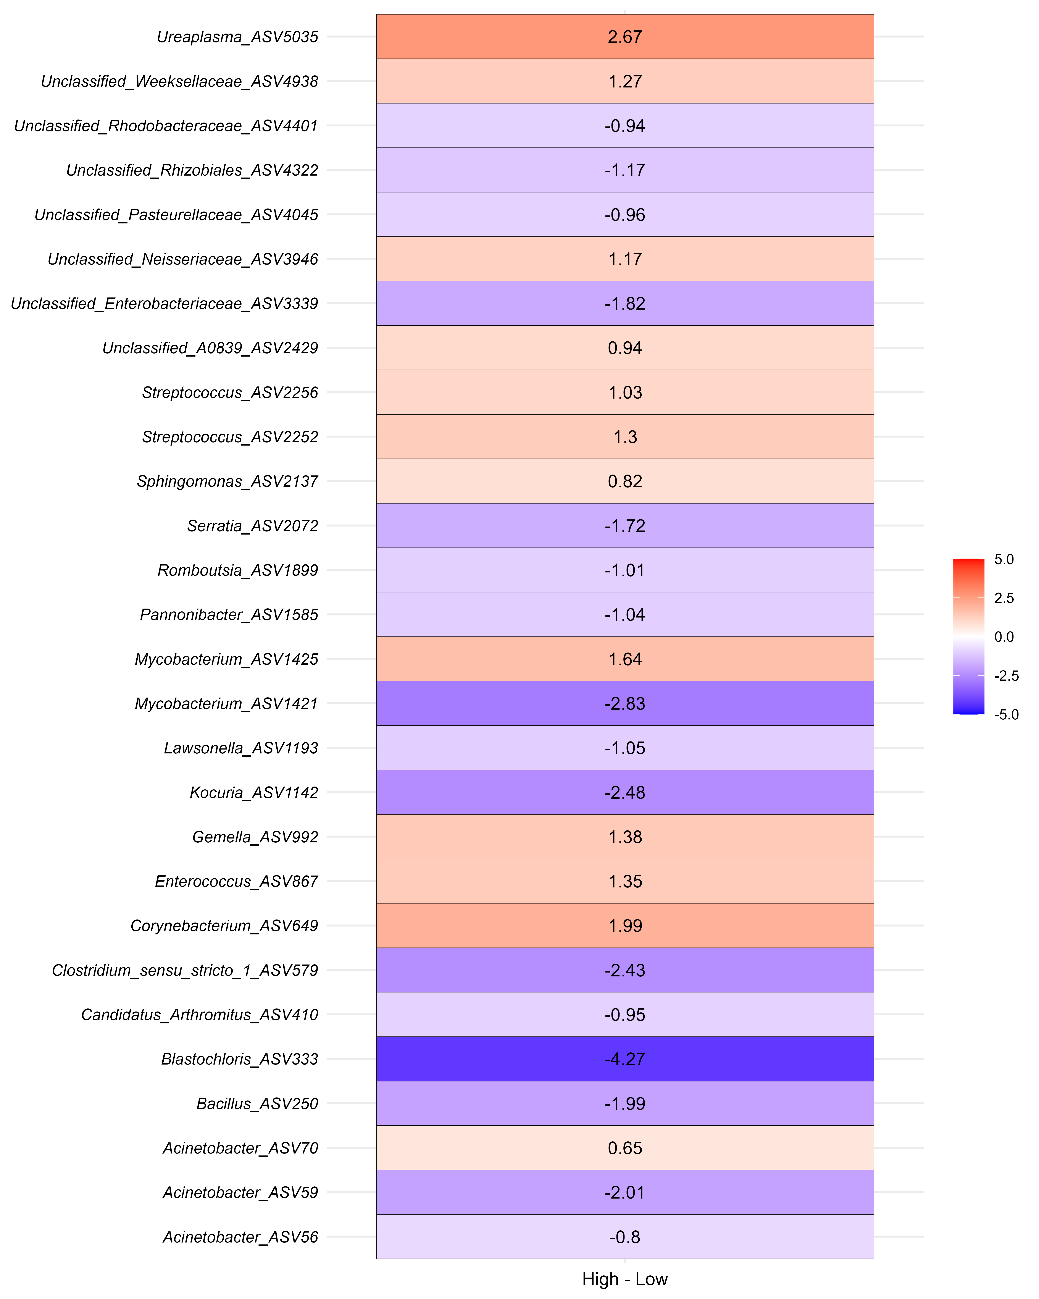


**Supplementary Fig 11.** ANCOMBC2 differential abundance analysis showing the fecal ASVs that differ between adult females of Leptonycteris yerbabuenae with low and high plasma bacterial killing-ability (BKA). The taxonomic classification of fecal ASVs is shown in the Y-axis and the comparison between low (reference group) and high BKA females is shown in the X-axis. The color of the box shows the direction of the change for each taxon (blue indicates a decrease and red an increase) respect the reference group. The numerical values within each box indicate the magnitude of the log change relative to the reference group. The Benjamini & Hochberg (BH) method was used to correct for multiple testing. All ASVs were identified as significant (p < 0.05). No ASV were significantly different after the multiple testing correction method.

**Supplementary Table 7.**  ASVs identified as differentially abundant by ANCOMBC2 between females with low and high bacterial killing-ability (BKA).

| taxon | *p* value | *q* value (Adjusted *p*) |
| --- | --- | --- |
| Corynebacterium_ASV649 | 0.003813796 | 0.090914645 |
| Unclassified_Enterobacteriaceae_ASV3339 | 0.004358518 | 0.090914645 |
| Mycobacterium_ASV1421 | 0.005536556 | 0.090914645 |
| Unclassified_Neisseriaceae_ASV3946 | 0.007136789 | 0.090914645 |
| Acinetobacter_ASV59 | 0.007189398 | 0.090914645 |
| Unclassified_A0839_ASV2429 | 0.008234234 | 0.090914645 |
| Mycobacterium_ASV1425 | 0.008807601 | 0.090914645 |
| Gemella_ASV992 | 0.009206546 | 0.090914645 |
| Bacillus_ASV250 | 0.011496603 | 0.100914629 |
| Blastochloris_ASV333 | 0.013387461 | 0.104705673 |
| Clostridium_sensu_stricto_1_ASV579 | 0.015650621 | 0.104705673 |
| Unclassified_Rhizobiales_1_ASV4322 | 0.015904659 | 0.104705673 |
| Sphingomonas_ASV2137 | 0.01957308 | 0.11185387 |
| Kocuria_ASV1142 | 0.019822205 | 0.11185387 |
| Ureaplasma_ASV5035 | 0.026746902 | 0.126748858 |
| Pannonibacter_ASV1585 | 0.027530596 | 0.126748858 |
| Lawsonella_ASV1193 | 0.029013497 | 0.126748858 |
| Candidatus_Arthromitus_ASV410 | 0.030925299 | 0.126748858 |
| Unclassified_Pasteurellaceae_ASV4045 | 0.033559664 | 0.126748858 |
| Enterococcus_ASV867 | 0.034340658 | 0.126748858 |
| Streptococcus_ASV2256 | 0.034419206 | 0.126748858 |
| Unclassified_Rhodobacteraceae_ASV4401 | 0.03529715 | 0.126748858 |
| Serratia_ASV2072 | 0.042599243 | 0.135833687 |
| Unclassified_Weeksellaceae_ASV4938 | 0.042888596 | 0.135833687 |
| Romboutsia_ASV1899 | 0.046008103 | 0.135833687 |
| Streptococcus_ASV2252 | 0.046837659 | 0.135833687 |
| Acinetobacter_ASV56 | 0.04689882 | 0.135833687 |
| Acinetobacter_ASV70 | 0.048143585 | 0.135833687 |

Note. The Benjamini & Hochberg (BH) method was used to correct p values (q value) for multiple testing.

**Supplementary Table 8.** ASVs identified as differentially abundant by ANCOMBC2 between males with low and high bacterial killing-ability (BKA).

| taxon | *p* value | *q* value (Adjusted *p*) |
| --- | --- | --- |
| Unclassified_Pasteurellaceae_ASV4045 | 0.000354 | 0.009327 |
| Lactococcus_ASV1183 | 0.000356 | 0.009327 |
| Salinisphaera_ASV1990 | 0.000442 | 0.009327 |
| Unclassified_Weeksellaceae_ASV4938 | 0.000464 | 0.009327 |
| Photobacterium_ASV1667 | 0.000539 | 0.009327 |
| Mycobacterium_ASV1419 | 0.000654 | 0.009327 |
| Unclassified_Erwiniaceae_ASV3358 | 0.000684 | 0.009327 |
| Blastochloris_ASV333 | 0.000687 | 0.009327 |
| Anaerococcus_ASV182 | 0.000781 | 0.009327 |
| Cardiobacterium_ASV494 | 0.000856 | 0.009327 |
| Streptococcus_ASV2257 | 0.00159 | 0.014554 |
| Mycoplasma_ASV1436 | 0.001602 | 0.014554 |
| Streptococcus_ASV2256 | 0.001895 | 0.015885 |
| Streptococcus_ASV2249 | 0.002286 | 0.017801 |
| Acinetobacter_ASV56 | 0.002942 | 0.021377 |
| Lautropia_ASV1188 | 0.003227 | 0.021983 |
| Unclassified_Neisseriaceae_ASV3946 | 0.003577 | 0.022938 |
| Ralstonia_ASV1797 | 0.004117 | 0.023755 |
| Exiguobacterium_ASV911 | 0.004364 | 0.023755 |
| Ureaplasma_ASV5034 | 0.004537 | 0.023755 |
| Salinisphaera_ASV2003 | 0.004577 | 0.023755 |
| Aureimonas_ASV246 | 0.00505 | 0.02502 |
| Rhodococcus_ASV1834 | 0.005853 | 0.026745 |
| Streptococcus_ASV2243 | 0.005889 | 0.026745 |
| Corynebacterium_ASV672 | 0.006205 | 0.027054 |
| Leptotrichia_ASV1245 | 0.007556 | 0.031096 |
| Providencia_ASV1735 | 0.007703 | 0.031096 |
| Pannonibacter_ASV1585 | 0.008706 | 0.033677 |
| Unclassified_Enterobacteriaceae_ASV3346 | 0.00896 | 0.033677 |
| Clostridium_sensu_stricto_ASV606 | 0.009328 | 0.033892 |
| Unclassified_Rhizobiaceae_ASV4310 | 0.011249 | 0.039554 |
| Paraclostridium_ASV1588 | 0.012157 | 0.040301 |
| Unclassified_Weeksellaceae_ASV4931 | 0.012201 | 0.040301 |
| Terrisporobacter_ASV2344 | 0.013152 | 0.042165 |
| Salinisphaera_ASV2008 | 0.015868 | 0.049417 |
| Unclassified_Neisseriaceae_ASV3945 | 0.020673 | 0.061581 |
| Gemella_ASV992 | 0.021544 | 0.061581 |
| Clostridium_sensu_stricto_1_ASV590 | 0.021896 | 0.061581 |
| Clostridium_sensu_stricto_1_ASV624 | 0.022033 | 0.061581 |
| Enhydrobacter_ASV863 | 0.024381 | 0.065694 |
| Pseudomonas_ASV1762 | 0.02471 | 0.065694 |
| Acinetobacter_ASV71 | 0.028854 | 0.074745 |
| Mycobacterium_ASV1427 | 0.029486 | 0.074745 |
| Mannheimia_ASV1301 | 0.034804 | 0.08622 |
| Unclassified_Pasteurellaceae_ASV4049 | 0.036354 | 0.088057 |
| Streptococcus_ASV2250 | 0.037207 | 0.088163 |
| Streptococcus_ASV2240 | 0.041536 | 0.096328 |
| Enterococcus_ASV871 | 0.043571 | 0.098943 |
| Sarcina_ASV2039 | 0.044579 | 0.099166 |
| Corynebacterium_ASV656 | 0.047398 | 0.103328 |

Note. The Benjamini & Hochberg (BH) method was used to correct p values (q value) for multiple testing.


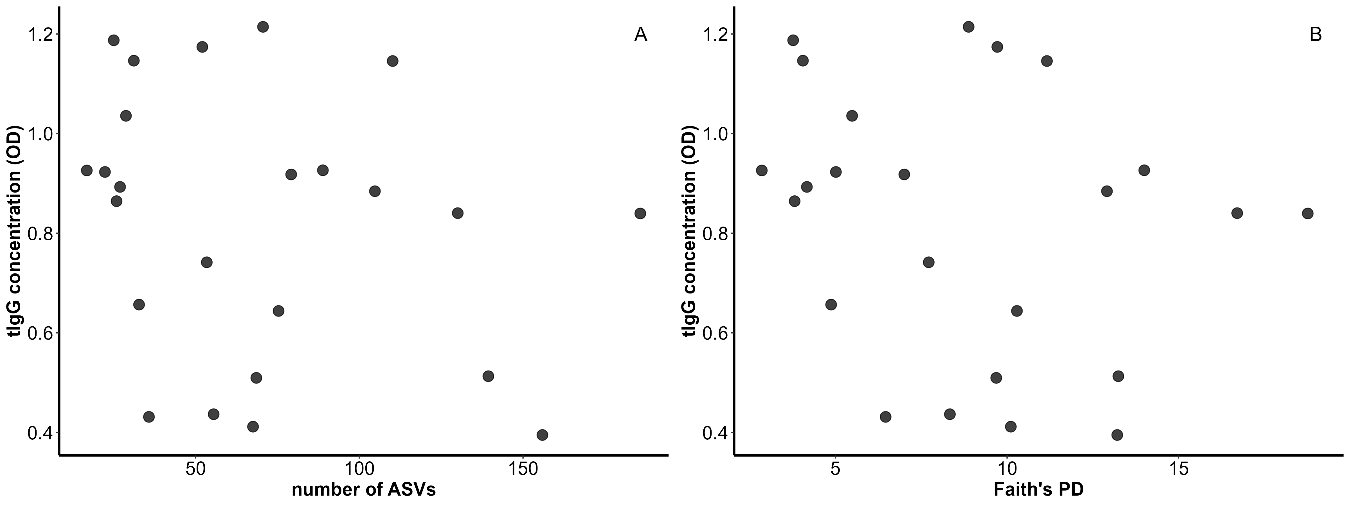


**Supplementary Fig 12.** Total immunoglobulin G concentration (tIgG) as a function of fecal microbiota alpha diversity in females of Leptonycteris yerbabuenae. Each point represents one individual and their associated tIgG value was calculated through optical density (OD). tIgG in relation to A) Observed number of ASVs and B) Faith’s PD index.


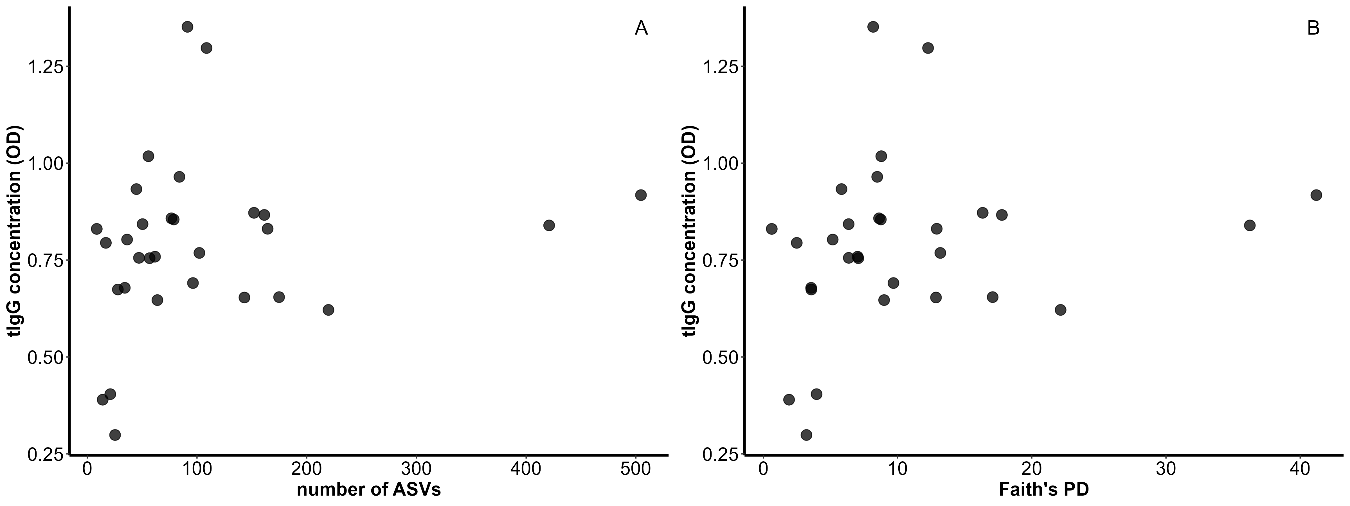


**Supplementary Fig 13.** Total immunoglobulin G concentration (tIgG) as a function of fecal microbiota alpha diversity in males of Leptonycteris yerbabuenae. Each point represents one individual and their associated tIgG value was calculated through optical density (OD). tIgG in relation to A) Observed number of ASVs and B) Faith’s PD index.


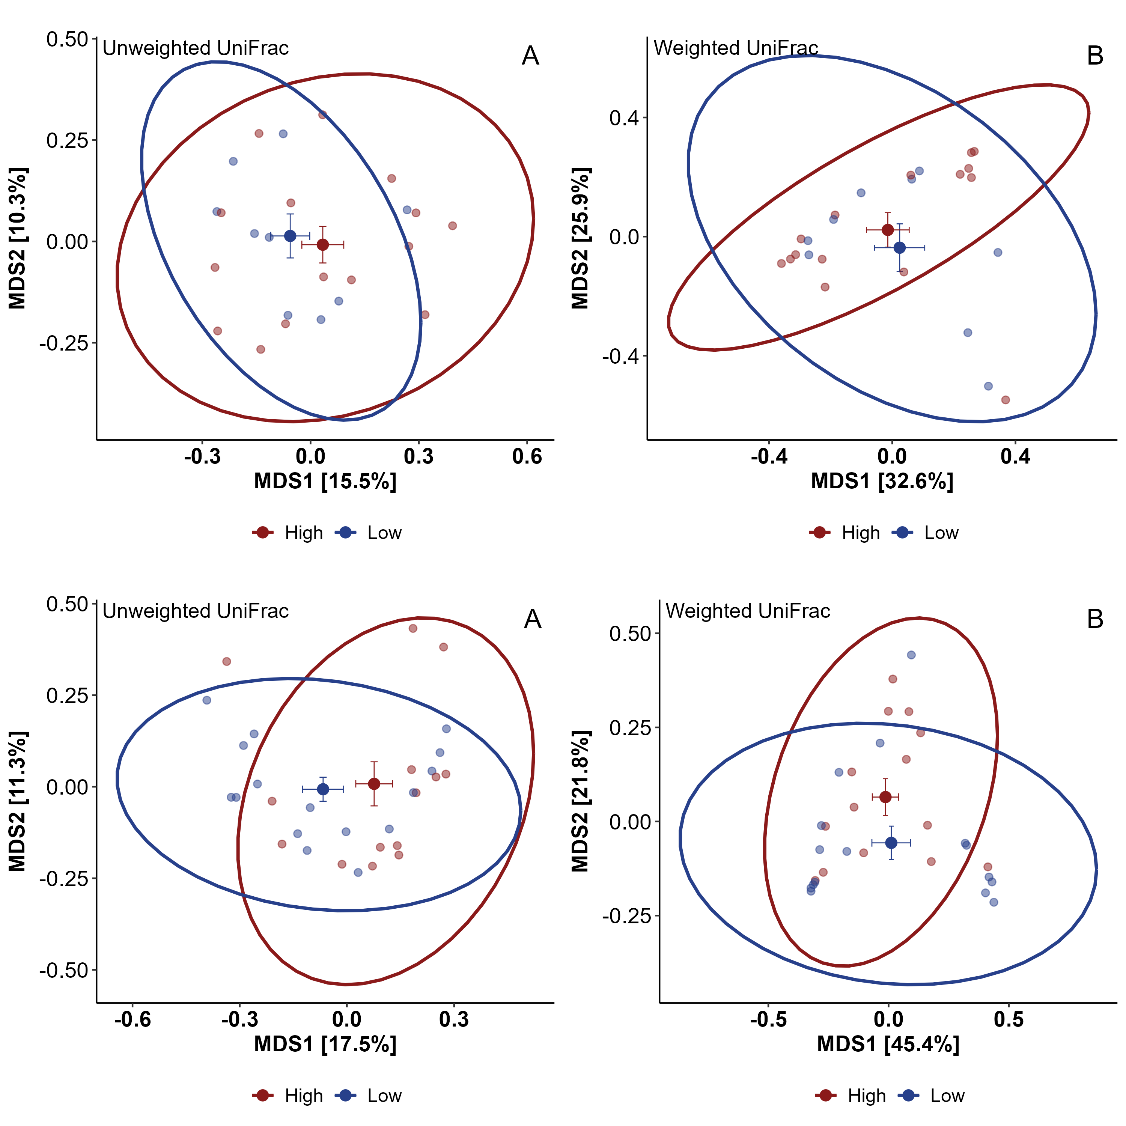


**Supplementary Fig 14.** Multidimensional scaling (MDS) of unweighted and weighted UniFrac distances of fecal microbiota in adults of Leptonycteris yerbabuenae. The centroid and respective standard error, ellipses and individual data for samples with low (blue) and high (red) total immunoglobulin G concentration (tIgG) are indicated in different colors. Upper panels show unweighted (A) and weighted UniFrac distances for females, lower panels show unweighted (C) and weighted (D) UniFrac distances for males. Female multivariate dispersion for unweighted (PERMDISP: F = 3.77, p = 0.063) and weighted (PERMDISP: F = 0.03, p = 0.862) UniFrac distances were not significantly different among groups. Lower panels show unweighted (C) and weighted (D) UniFrac distances for males. Male multivariate dispersion for unweighted (PERMDISP: F = 1x10-3, p = 0. 969) and weighted (PERMDISP: F = 3.82, p = 0. 059) UniFrac distances were not significantly different among groups.

**Supplementary Table 9.** PERMANOVA results for unweighted and weighted UniFrac distances in males and females with high and low total immunoglobulin Gg (tIgG).

| **Beta diversity metric** | **Sex** | ***R2*** | ***F*** | ***p*** | ***n*** |
| --- | --- | --- | --- | --- | --- |
| Unweighted UniFrac distance | Female | 0.038 | 0.948 | 0.519 | 24 |
| Weighted UniFrac distance | Female | 0.029 | 0.691 | 0.672 | 24 |
| Unweighted UniFrac distance | Male | 0.046 | 1.379 | 0.080 | 30 |
| Weighted UniFrac distance | Male | 0.046 | 1.360 | 0.219 | 30 |

**Supplementary Table 10.** ASVs identified as differentially abundant by ANCOMBC2 between female Leptonycteris yerbabuenae with low and high total immunoglobulin G (tIgG).

| taxon | *p* value | *q* value (Adjusted *p*) |
| --- | --- | --- |
| Enhydrobacter_ASV863 | 0.000161 | 0.009886 |
| Acinetobacter_ASV59 | 0.000265 | 0.009886 |
| Bacillus_ASV250 | 0.00045 | 0.009886 |
| Clostridium_sensu_stricto_1_ASV623 | 0.000494 | 0.009886 |
| Unclassified_Pasteurellaceae_ASV4044 | 0.00088 | 0.014081 |
| Clostridium_sensu_stricto_1_ASV585 | 0.001083 | 0.014443 |
| Pannonibacter_ASV1585 | 0.001408 | 0.01609 |
| Flavobacterium_ASV952 | 0.002086 | 0.020858 |
| Clostridium_sensu_stricto_1_ASV624 | 0.003267 | 0.02481 |
| Actinomyces_ASV82 | 0.003566 | 0.02481 |
| Streptococcus_ASV2249 | 0.003636 | 0.02481 |
| Acinetobacter_ASV67 | 0.003722 | 0.02481 |
| Unclassified_Rhizobiales_ASV4322 | 0.004094 | 0.025194 |
| Lawsonella_ASV1193 | 0.004663 | 0.026644 |
| Unclassified_Enterobacteriaceae_ASV3331 | 0.006251 | 0.033337 |
| Corynebacterium_ASV662 | 0.007682 | 0.038411 |
| Gemella_ASV992 | 0.009005 | 0.04107 |
| Unclassified_Marinococcaceae_ASV3814 | 0.009241 | 0.04107 |
| Enterococcus_ASV871 | 0.009899 | 0.041682 |
| Brevundimonas_ASV372 | 0.01084 | 0.043359 |
| Acinetobacter_ASV70 | 0.012839 | 0.048909 |
| Corynebacterium_ASV672 | 0.016508 | 0.058228 |
| Sarcina_ASV2039 | 0.016741 | 0.058228 |
| Blastochloris_ASV333 | 0.017476 | 0.058253 |
| Staphylococcus_ASV2221 | 0.02155 | 0.068959 |
| Clostridium_sensu_stricto_1_ASV616 | 0.026992 | 0.079697 |
| Acinetobacter_ASV56 | 0.027259 | 0.079697 |
| Kocuria_ASV1142 | 0.027894 | 0.079697 |
| Scytonema_VB-61278_ASV2047 | 0.030658 | 0.084574 |
| Serratia_ASV2072 | 0.034263 | 0.090138 |
| Romboutsia_ASV1899 | 0.035229 | 0.090138 |
| Unclassified_Weeksellaceae_ASV4938 | 0.037889 | 0.090138 |
| Lactococcus_ASV1182 | 0.038124 | 0.090138 |
| Unclassified_Pectobacteriaceae_ASV4074 | 0.038309 | 0.090138 |
| Leptotrichia_ASV1245 | 0.049993 | 0.11427 |

Note. The Benjamini & Hochberg (BH) method was used to correct p values (q value) for multiple testing.

**Supplementary Table 11.** ASVs identified as differentially abundant by ANCOMBC2 between male Leptonycteris yerbabuenae with low and high total immunoglobulin G (tIgG).

| taxon | *p* value | *q* value (Adjusted *p*) |
| --- | --- | --- |
| Unclassified_Pasteurellaceae_ASV4050 | 0.000227 | 0.022972 |
| Providencia_ASV1735 | 0.000516 | 0.026078 |
| Unclassified_Enterobacteriaceae_ASV3346 | 0.000937 | 0.031543 |
| Clostridium_sensu_stricto_1_ASV616 | 0.001326 | 0.033477 |
| Anaerococcus_ASV182 | 0.001814 | 0.036647 |
| Clostridium_sensu_stricto_1_ASV606 | 0.002244 | 0.037775 |
| Blastochloris_ASV333 | 0.003211 | 0.046328 |
| Corynebacterium_ASV656 | 0.003808 | 0.048074 |
| Salinisphaera_ASV2003 | 0.004909 | 0.055093 |
| Mycoplasma_ASV1436 | 0.006848 | 0.065027 |
| Clostridium_sensu_stricto_1_ASV610 | 0.007496 | 0.065027 |
| Unclassified_Flavobacteriaceae_ASV3407 | 0.007726 | 0.065027 |
| Ureaplasma_ASV5034 | 0.009716 | 0.075486 |
| Mycoplasma_ASV1457 | 0.01217 | 0.087798 |
| Scytonema_VB-61278_ASV2047 | 0.013172 | 0.088689 |
| Unclassified_Neisseriaceae_ASV3946 | 0.015045 | 0.094969 |
| Unclassified_Rhizobiaceae_ASV4295 | 0.016542 | 0.098281 |
| Peptoniphilus_ASV1625 | 0.019269 | 0.108119 |
| Escherichia-Shigella_ASV894 | 0.023323 | 0.123979 |
| Streptococcus_ASV2243 | 0.033355 | 0.163991 |
| Unclassified_Rhodobacteraceae_ASV4401 | 0.035444 | 0.163991 |
| Romboutsia_ASV1899 | 0.035721 | 0.163991 |
| Actinomyces_ASV82 | 0.043283 | 0.179704 |
| Unclassified_Pasteurellaceae_ASV4045 | 0.044472 | 0.179704 |
| Mycoplasma_ASV1442 | 0.045782 | 0.179704 |
| Staphylococcus_ASV2218 | 0.046592 | 0.179704 |
| Methylobacterium-Methylorubrum_ASV1364 | 0.049645 | 0.179704 |
| Gemella_ASV992 | 0.049819 | 0.179704 |

Note. The Benjamini & Hochberg (BH) method was used to correct p values (q value) for multiple testing.

**Supplementary Table 12.** Bacterial genera associated with high plasma bacterial killing-ability (BKA) in Leptonycteris yerbabuenae.

| **Genera** | **Sex** | **BKA association** | **Number of ASVs** | **Biological association** |
| --- | --- | --- | --- | --- |
| *Brevinema* | Female | Exclusive | 1 | Infection [1, 2] |
| *Chlamydia* | Female | Exclusive | 1 | Infection [3–5] |
| *Cardiobacterium* | Male | Upregulated | 1 | Infection [6, 7] |
| *Clostridium sensu stricto 1 †** | Female-Male | Exclusive-Upregulated | 1F/3M | Infection [8–14] |
| *Corynebacterium* | Female | Exclusive | 1 | SIM-Infection [15–20] |
| *Enterococcus †** | Female | Exclusive | 1 | IMST-Infection [11, 12, 21–23] |
| *Escherichia-Shigella †* | Male | Exclusive | 4 | Infection [11–13, 24, 25] |
| *Exiguobacterium* | Male | Upregulated | 1 | IMST [26] |
| *Fructobacillus* | Male | Exclusive | 1 | IMST [27, 28] |
| *Gemella ** | Male | Exclusive | 2 | Infection [29–31] |
| *Lactococcus ** | Male | Upregulated | 1 | IMST-Infection [14, 32–34] |
| *Lautropia* | Male | Upregulated | 1 | Infection [35] |
| *Leptotrichia* | Male | Upregulated | 1 | Infection [36, 37] |
| *Mycoplasma ** | Female | Exclusive | 1 | Infection [14, 31, 38–40] |
| *Neisseria* | Male | Exclusive | 1 | Infection [41, 42] |
| *Paeniclostridium* | Female | Exclusive | 1 | Infection [43, 44] |
| *Photobacterium* | Male | Upregulated | 1 | Infection [45, 46] |
| *Providencia* | Male | Upregulated | 1 | Infection [47–49] |
| *Ralstonia* | Male | Upregulated | 1 | Infection [50–52] |
| *Rhodococcus ** | Male | Upregulated | 1 | Infection [14, 53, 54] |
| *Streptococcus ** | Female-Male | Exclusive-Upregulated | 2F/5M | Infection [14, 23, 55–58] |
| *Ureaplasma ** | Female-Male | Exclusive-Upregulated | 2 | Infection [31, 59, 60] |
| *Weissella ** | Male | Exclusive | 1 | IMST [23, 61, 62] |

Note: Genera associated with death and disease in bats (†), and with gut microbiota dysbiosis in bats (*). Bacterial genera that include species associated with strong intestinal mucosa (SIM) and immunostimulatory properties (IMST). In the column titled 'Number of ASVs', the number of ASVs for each sex is distinguished by the letters F and M, which stand for 'female' and 'male', respectively, for bacterial genera identified in both females and males.

**Supplementary Table 13.** Bacterial genera associated with low plasma bacterial killing-ability (BKA) in Leptonycteris yerbabuenae.

| **Genera** | **Sex** | **BKA association** | **Number of ASVs** | **Biological association** |
| --- | --- | --- | --- | --- |
| *Acinetobacter ** | Female-Male | Exclusive-Upregulated | 2 | Infection [14, 23, 63–65] |
| *Anaerococcus* | Male | Upregulated | 1 | Infection [66, 67] |
| *Aureimonas* | Male | Upregulated | 1 | Infection [68–70] |
| *Clostridium sensu stricto 1 †** | Male | Exclusive | 2 | Infection [8–14] |
| *Corynebacterium* | Male | Exclusive-Upregulated | 2 | SIM-Infection [15–20] |
| *Escherichia-Shigella †** | Female | Exclusive | 1 | Infection [11–13, 24, 25] |
| *Helicobacter* | Female | Exclusive | 1 | Infection [71, 72] |
| *Mycobacterium* | Male | Upregulated | 1 | Infection [73] |
| *Mycoplasma ** | Male | Exclusive-Upregulated | 1 | Infection [14, 31, 38–40] |
| *Pannonibacter* | Male | Upregulated | 1 | Infection [74, 75] |
| *Paraclostridium* | Male | Upregulated | 1 | SIM-Infection [76] |
| *Serratia †* | Male | Exclusive | 1 | Infection [11, 77, 78] |
| *Staphylococcus †** | Male | Exclusive | 1 | Infection [11, 12, 23, 79, 80] |
| *Terrisporobacter* | Male | Upregulated | 1 | Infection [81–83] |

Note: Genera associated with death and disease in bats (†), and with gut microbiota dysbiosis in bats (*). Bacterial genera that include species associated with strong intestinal mucosa (SIM).

**Supplementary Table 14**. Bacterial genera associated with high total immunoglobulin G (tIgG) in Leptonycteris yerbabuenae.

| **Genera** | **Sex** | **BKA association** | **Number of ASVs** | **Biological association** |
| --- | --- | --- | --- | --- |
| *Acinetobacter ** | Female | Upregulated | 1 | Infection [14, 23, 63–65] |
| *Actinomyces* | Female | Upregulated | 1 | SCFAs-Infection [84, 85] |
| *Bacillus †* | Female | Upregulated | 1 | SCFAs [11, 12, 86–88] |
| *Chlamydia* | Female | Exclusive | 1 | Infection [3–5] |
| *Escherichia-Shigella †** | Female-Male | Exclusive | 1F/3M | Infection [11–13, 24, 25] |
| *Gemella ** | Male | Exclusive | 1 | Infection [29–31] |
| *Mycoplasma ** | Male | Exclusive | 1 | Infection [14, 31, 38–40] |
| *Paeniclostridium* | Female | Exclusive | 1 | SCFAs-Infection [43, 44, 89] |
| *Providencia* | Male | Exclusive | 1 | Infection [47–49] |
| *Serratia †* | Male | Exclusive | 1 | Infection [11, 77, 78] |
| *Streptococcus ** | Male | Exclusive | 1 | SCFAs-Infection [14, 23, 55–58] |
| *Ureaplasma ** | Female-Male | Exclusive | 2 | Infection [31, 59, 60] |

Note: Genera associated with death and disease in bats (†), and with gut microbiota dysbiosis in bats (*). Bacterial genera with species associated with production of short chain fatty acids (SCFAs). In the column titled 'Number of ASVs', the number of ASVs for each sex is distinguished by the letters F and M, which stand for 'female' and 'male', respectively, for bacterial genera identified in both females and males.

**Supplementary Table 15.** Bacterial genera associated with low total immunoglobulin G (tIgG) in Leptonycteris yerbabuenae.

| **Genera** | **Sex** | **BKA association** | **Number of ASVs** | **Biological association** |
| --- | --- | --- | --- | --- |
| *Acinetobacter ** | Female | Upregulated | 2 | Infection [14, 23, 63–65] |
| *Anaerococcus* | Male | Upregulated | 1 | Infection [66, 90] |
| *Brevundimonas* | Female | Upregulated | 1 | Infection [91] |
| *Clostridium sensu stricto 1 †** | Female-Male | Exclusive-Upregulated | 3F/4M | SIM-Infection [8–14] |
| *Corynebacterium* | Female-Male | Upregulated | 2 | SIM-Infection [15–20] |
| *Enhydrobacter* | Female | Upregulated | 1 | Infection [92–94] |
| *Enterococcus †** | Female | Exclusive-Upregulated | 2 | IMST-Infection [11, 12, 21–23] |
| *Flavobacterium* | Female | Upregulated | 1 | Infection [95, 96] |
| *Fructobacillus* | Male | Exclusive | 1 | Probiotic [27, 28] |
| *Gemella ** | Female-Male | Exclusive-Upregulated | 1 | Infection [29–31] |
| *Helicobacter* | Male | Exclusive | 1 | Infection [71, 72] |
| *Lawsonella* | Female | Upregulated | 1 | Infection [97] |
| *Mycoplasma ** | Male | Exclusive | 1 | Infection [14, 31, 38–40] |
| *Pannonibacter* | Female | Upregulated | 1 | FL-Infection [74, 75] |
| *Providencia* | Male | Upregulated | 1 | Infection [47–49] |
| *Staphylococcus †** | Male | Exclusive | 2 | Infection [11, 12, 23, 79, 80] |
| *Streptococcus ** | Female | Exclusive-Upregulated | 1 | SIM-Infection [14, 23, 55–58] |

Note: Genera associated with death and disease in bats (†), and with gut microbiota dysbiosis in bats (*). Bacterial genera with species associated with a free-living (FL) lifestyle, as well as with a strong intestinal mucosa (SIM) and immunostimulatory properties (IMST). In the column titled 'Number of ASVs', the number of ASVs for each sex is distinguished by the letters F and M, which stand for 'female' and 'male', respectively, for bacterial genera identified in both females and males.

**Supplementary Table 16.** Unclassified and environmental bacteria associated with high plasma bacterial killing-ability (BKA) in Leptonycteris yerbabuenae.

| **Genera** | **Sex** | **BKA association** | **Number of ASVs** | **Biological association** |
| --- | --- | --- | --- | --- |
| *Salinisphaera* | Male | Upregulated | 2 | Halophile enviroment [98] |
| Unclassified_Enterobacterales | Male | Exclusive | 1 | Broad [99] |
| Unclassified_Enterobacteriaceae †* | Male | Exclusive | 3 | Broad [12, 14, 23, 99] |
| Unclassified_Erwiniaceae | Male | Upregulated | 1 | Broad [100–102] |
| Unclassified_Neisseriaceae * | Male | Exlsuive-Upregulated | 2 | Broad [23, 41, 103] |
| Unclassified_Pasteurellaceae †* | Male | Upregulated | 3 | Broad [104–109] |
| Unclassified_Weeksellaceae | Male | Upregulated | 1 | Broad [110–112] |

Note: Families associated with death and disease in bats (†), and with gut microbiota dysbiosis in bats (*).

**Supplementary Table 17.** Unclassified and environmental bacteria associated with low bacterial killing-ability (BKA).in Leptonycteris yerbabuenae

| **Genera** | **Sex** | **BKA association** | **Number of ASVs** | **Biological association** |
| --- | --- | --- | --- | --- |
| *Blastochloris* | Female-Male | Exclusive-Upregulated | 2F/1M | Water enviroments [113] |
| *Cyanobium_PCC-6307* | Female | Exclusive-Upregulated | 1 | Dysbiosis-Water enviroments [114–116] |
| *GKS98_freshwater_group* | Female | Exclusive | 2 | Water enviroments [117] |
| *Pannonibacter* | Male | Upregulated | 1 | FL-Infection [74, 75] |
| Unclassified_Chromatiaceae | Female | Exclusive | 1 | Broad [118] |
| Unclassified_Enterobacterales | Female | Exclusive | 1 | Broad [99] |
| Unclassified_Enterobacteriaceae †* | Female-Male | Exclusive-Upregulated | 2 | Broad [12, 14, 23, 99] |
| Unclassified_Erwiniaceae | Female | Exclusive | 1 | Broad [100–102] |
| Unclassified_Rhizobiaceae | Male | Upregulated | 1 | Broad [119] |
| Unclassified_Synergistaceae | Female | Exclusive | 1 | Broad [120] |

Note: Families associated with death and disease in bats (†), and with gut microbiota dysbiosis in bats (*). Bacterial genera with species associated with a free-living (FL) lifestyle. In the column titled 'Number of ASVs', the number of ASVs for each sex is distinguished by the letters F and M, which stand for 'female' and 'male', respectively, for bacterial genera identified in both females and males.

**Supplementary Table 18.** Unclassified and environmental bacteria associated with high total immunoglobulin G concentration (tIgG) in Leptonycteris yerbabuenae.

| **Genera** | **Sex** | **BKA association** | **Number of ASVs** | **Biological association** |
| --- | --- | --- | --- | --- |
| *Blastochloris* | Male | Upregulated | 1 | Water enviroment [113] |
| *Cyanobium_PCC-6307* | Female | Exclusive | 1 | Dysbiosis-Water enviroment [114–116] |
| *GKS98_freshwater_group* | Female | Exclusive | 2 | Water enviroment [117] |
| Unclassified_Enterobacterales | Female | Exclusive | 1 | Broad [99] |
| Unclassified_Enterobacteriaceae †* | Male | Exclusive | 1 | Broad [12, 14, 23, 99] |
| Unclassified_Erwiniaceae | Male | Exclusive | 2 | Broad [100–102] |
| Unclassified_Marinococcaceae | Female | Upregulated | 1 | Halophile enviroment [121] |
| Unclassified_Pasteurellaceae †* | Male | Exclusive | 1 | Broad [104–109] |
| Unclassified_Synergistaceae | Female | Exclusive | 1 | Broad[120] |

Note: Families associated with death and disease in bats (†), and with gut microbiota dysbiosis in bats (*).

**Supplementary Table 19.** Unclassified and environmental bacteria associated with low total immunoglobulin G concentration (tIgG) in Leptonycteris yerbabuenae.

| **Genera** | **Sex** | **BKA association** | **Number of ASVs** | **Biological association** |
| --- | --- | --- | --- | --- |
| *Asaia* | Female | Exclusive | 1 | FL-Insects [122–126] |
| *Blastochloris* | Female | Exclusive | 1 | Water enviroments [113] |
| *Fimbriiglobus* | Female | Exclusive | 1 | Water enviroments [127, 128] |
| *Limnothrix* | Female | Exclusive | 1 | Water enviroments [129, 130] |
| *Methyloparacoccus* | Female | Exclusive | 1 | Water enviroments [131] |
| *Pannonibacter* | Female | Upregulated | 1 | FL-Infection [74, 75] |
| *Rhodopseudomonas* | Female | Exclusive | 2 | Water enviroments [132] |
| Unclassified_Chromatiaceae | Female | Exclusive | 2 | Water enviroments [118] |
| Unclassified_Enterobacteriaceae †* | Female-Male | Exclusive-Upregulated | 3F/5M | Broad [12, 14, 23, 99] |
| Unclassified_Erwiniaceae | Female | Exclusive | 2 | Insects [100–102] |
| Unclassified_Marinococcaceae | Female | Upregulated | 1 | Halophile enviroment [121] |
| Unclassified_Pasteurellaceae †* | Male | Exclusive-Upregulated | 2 | Broad [104–109] |
| Unclassified_Rhizobiales | Female | Upregulated | 1 | Broad [133] |

Note: Families associated with death and disease in bats (†), and with gut microbiota dysbiosis in bats (*). Bacteria genera with species associated with a free-living style (FL). In the column titled 'Number of ASVs', the number of ASVs for each sex is distinguished by the letters F and M, which stand for 'female' and 'male', respectively, for bacterial genera identified in both females and males.

Bibliography

1. Paimeeka S, Tangsongcharoen C, Lertwanakarn T, et al (2024) Tilapia lake virus infection disrupts the gut microbiota of red hybrid tilapia (*Oreochromis* spp.). Aquaculture 586:740752. https://doi.org/10.1016/j.aquaculture.2024.740752

2. Wang R, Pan X, Xu Y (2020) Altered intestinal microbiota composition associated with enteritis in yellow seahorses *Hippocampus kuda* (Bleeker, 1852). Curr Microbiol 77:730–737. https://doi.org/10.1007/s00284-019-01859-6

3. Jin Y, Li W, Ba X, et al (2023) Gut microbiota changes in horses with *Chlamydia*. BMC Microbiol 23:246. https://doi.org/10.1186/s12866-023-02986-8

4. Cheong HC, Lee CYQ, Cheok YY, et al (2019) Chlamydiaceae: Diseases in primary hosts and zoonosis. Microorganisms 7:146. https://doi.org/10.3390/microorganisms7050146

5. Elwell C, Mirrashidi K, Engel J (2016) *Chlamydia* cell biology and pathogenesis. Nat Rev Microbiol 14:385–400. https://doi.org/10.1038/nrmicro.2016.30

6. Ono R, Kitagawa I, Kobayashi Y (2023) *Cardiobacterium hominis* infective endocarditis: A literature review. American Heart Journal Plus: Cardiology Research and Practice 26:100248. https://doi.org/10.1016/j.ahjo.2022.100248

7. Bassani F, Pagani G, Franzetti M, et al (2025) Insidious clinical presentation of uncommon infective endocarditis caused by *Cardiobacterium* species. New Microbiologica 48:102–112

8. Xiang H, Liu Z, Xiang H, et al (2022) Dynamics of the gut-liver axis in rats with varying fibrosis severity. Int J Biol Sci 18:3390–3404. https://doi.org/10.7150/ijbs.69833

9. Yang WY, Lee Y, Lu H, et al (2019) Analysis of gut microbiota and the effect of lauric acid against necrotic enteritis in *Clostridium perfringens* and *Eimeria* side-by-side challenge model. PLoS One 14:e0205784. https://doi.org/10.1371/journal.pone.0205784

10. Liu J, Luo M, Qin S, et al (2022) Significant succession of intestinal bacterial community and function during the initial 72 Hours of acute pancreatitis in rats. Front Cell Infect Microbiol 12:808991. https://doi.org/10.3389/fcimb.2022.808991

11. Mühldorfer K, Speck S, Kurth A, et al (2011) Diseases and causes of death in European bats: Dynamics in disease susceptibility and infection rates. PLoS One 6:e29773. https://doi.org/10.1371/journal.pone.0029773

12. Mühldorfer K, Speck S, Wibbelt G (2011) Diseases in free-ranging bats from Germany. BMC Vet Res 7:61. https://doi.org/10.1186/1746-6148-7-61

13. Hajkova P, Pikula J (2007) Veterinary treatment of evening bats (vespertilionidae) in the Czech Republic. Veterinary Record 161:139–140. https://doi.org/10.1136/vr.161.4.139

14. Wasimuddin, Brändel SD, Tschapka M, et al (2018) Astrovirus infections induce age-dependent dysbiosis in gut microbiomes of bats. ISME Journal 12:2883–2893. https://doi.org/10.1038/s41396-018-0239-1

15. Ye J, Li Y, Wang X, et al (2023) Positive interactions among *Corynebacterium glutamicum* and keystone bacteria producing SCFAs benefited T2D mice to rebuild gut eubiosis. Food Research International 172:113163. https://doi.org/10.1016/j.foodres.2023.113163

16. Gladysheva I V., Chertkov KL, Cherkasov S V., et al (2023) Probiotic potential, safety properties, and antifungal activities of *Corynebacterium amycolatum* ICIS 9 and *Corynebacterium amycolatum* ICIS 53 Strains. Probiotics Antimicrob Proteins 15:588–600. https://doi.org/10.1007/s12602-021-09876-3

17. Lee S, Cho Y, Park S, et al (2024) Dietary heme-enriched *Corynebacterium* extract exerts health benefits by reshaping gut microbiota. Food Biosci 62:105062. https://doi.org/10.1016/j.fbio.2024.105062

18. Shamsuzzaman M, Dahal RH, Kim S, Kim J (2023) Genome insight and probiotic potential of three novel species of the genus *Corynebacterium*. Front Microbiol 14:1225282. https://doi.org/10.3389/fmicb.2023.1225282

19. Li D, Jiang Y, Cui Z, et al (2024) *Lactobacillus acidophilus* protects against *Corynebacterium pseudotuberculosis* infection by regulating the autophagy of macrophages and maintaining gut microbiota homeostasis in C57BL/6 mice. mSystems 9:e00484-24. https://doi.org/10.1128/msystems.00484-24

20. Yamamuro R, Hosokawa N, Otsuka Y, Osawa R (2021) Clinical characteristics of *Corynebacterium* bacteremia caused by different Species, Japan, 2014-2020. Emerg Infect Dis 27:2981–2987. https://doi.org/10.3201/eid2712.210473

21. Xu Y, Li Y, Xue M, et al (2022) Effects of dietary *Enterococcus faecalis* YFI-G720 on the growth, immunity, serum biochemical, intestinal morphology, intestinal microbiota, and disease resistance of Crucian Carp (*Carassius auratus*). Fishes 7:18. https://doi.org/10.3390/fishes7010018

22. Krawczyk B, Wityk P, Gałęcka M, Michalik M (2021) The many faces of *Enterococcus spp.*—commensal, probiotic and opportunistic pathogen. Microorganisms 9:1900. https://doi.org/10.3390/microorganisms9091900

23. Berman TS, Weinberg M, Moreno KR, et al (2023) In sickness and in health: the dynamics of the fruit bat gut microbiota under a bacterial antigen challenge and its association with the immune response. Front Immunol 14:1152107. https://doi.org/10.3389/fimmu.2023.1152107

24. Li S, Guo J, Liu R, et al (2022) Predominance of *Escherichia-Shigella* in gut microbiome and its potential correlation with elevated level of plasma tumor necrosis factor alpha in patients with tuberculous meningitis. Microbiol Spectr 10:e0192-22. https://doi.org/10.1128/spectrum.01926-22

25. Baske MM, Timmerman KC, Garmo LG, et al (2024) Fecal microbiota transplant on *Escherichia-Shigella* gut composition and its potential role in the treatment of generalized anxiety disorder: A systematic review. J Affect Disord 354:309–317. https://doi.org/10.1016/j.jad.2024.03.088

26. Zhang M, Feng Y, Zhong Z, et al (2024) Host gut-derived probiotic, *Exiguobacterium acetylicum* G1-33, improves growth, immunity, and resistance to *Vibrio harveyi* in hybrid grouper (*Epinephelus fuscoguttatus* ♀ × *Epinephelus lanceolatus* ♂). Microorganisms 12:1688. https://doi.org/10.3390/microorganisms12081688

27. Dicks LMT, Endo A (2022) Are fructophilic lactic acid bacteria (FLAB) beneficial to humans? Benef Microbes 13:3–12. https://doi.org/10.3920/BM2021.0044

28. Endo A, Maeno S, Tanizawa Y, et al (2018) Fructophilic lactic acid bacteria, a unique group of fructose-fermenting microbes. Appl Environ Microbiol 84:e01290-18. https://doi.org/10.1128/AEM.01290-18

29. García López E, Martín-Galiano AJ (2020) The versatility of opportunistic infections caused by *Gemella* isolates is supported by the carriage of virulence factors from multiple Origins. Front Microbiol 11:524. https://doi.org/10.3389/fmicb.2020.00524

30. Chesdachai S, Yetmar ZA, Tabaja H, et al (2022) Contemporary experience of *Abiotrophia, Granulicatella and Gemella* bacteremia. Journal of Infection 84:511–517. https://doi.org/10.1016/j.jinf.2022.01.039

31. Melville DW, Meyer M, Risely A, et al (2025) *Hibecovirus* (genus *Betacoronavirus*) infection linked to gut microbial dysbiosis in bats. ISME Communications 5:ycae154. https://doi.org/10.1093/ismeco/ycae154

32. Paritova A, Nurgaliyev A, Nurgaliyeva G, et al (2024) The dietary effects of two strain probiotics (*Leuconostoc mesenteroides*, *Lactococcus lactis*) on growth performance, immune response and gut microbiota in Nile tilapia (*Oreochromis niloticus*). PLoS One 19:e0312580. https://doi.org/10.1371/journal.pone.0312580

33. Su FJ, Periyasamy T, Chen MM (2022) Comparative transcriptomic immune responses of Mullet (*Mugil cephalus*) infected by planktonic and biofilm *Lactococcus garvieae*. Front Cell Infect Microbiol 12:887921. https://doi.org/10.3389/fcimb.2022.887921

34. Wu F, Xie X, Du T, et al (2023) *Lactococcus lactis*, a bacterium with probiotic functions and pathogenicity. World J Microbiol Biotechnol 39:325. https://doi.org/10.1007/s11274-023-03771-5

35. Genseke S, Berisha M, Teerstegen A, et al (2025) *Lautropia mirabilis* sepsis in immunodeficiency: first report and genomic features. Infection 53:457–462. https://doi.org/10.1007/s15010-024-02388-6

36. Eribe ERK, Olsen I (2017) *Leptotrichia* species in human infections II. J Oral Microbiol 9:1368848. https://doi.org/10.1080/20002297.2017.1368848

37. Ranganath N, Shirley JD, Challener DW, et al (2023) *Leptotrichia* bacteremia: 10-year retrospective clinical analysis and antimicrobial susceptibility profiles. J Clin Microbiol 61:e01733-22. https://doi.org/10.1128/jcm.01733-22

38. Hu J, Ye Y, Chen X, et al (2023) Insight into the pathogenic mechanism of *Mycoplasma pneumoniae*. Curr Microbiol 80:14. https://doi.org/10.1007/s00284-022-03103-0

39. Xiu F, Li X, Liu L, et al (2024) *Mycoplasma* invasion into host cells: An integrated model of infection strategy. Mol Microbiol 121:814–830. https://doi.org/10.1111/mmi.15232

40. Yadav JP, Tomar P, Singh Y, Khurana SK (2022) Insights on *Mycoplasma gallisepticum* and *Mycoplasma synoviae* infection in poultry: a systematic review. Anim Biotechnol 33:1711–1720. https://doi.org/10.1080/10495398.2021.1908316

41. Lu QF, Cao DM, Su LL, et al (2019) Genus-wide comparative genomics analysis of Neisseria to identify new genes associated with pathogenicity and niche adaptation of *Neisseria* pathogens. Int J Genomics 2019:6015730. https://doi.org/10.1155/2019/6015730

42. Humbert MV, Christodoulides M (2020) Atypical, yet not infrequent, infections with *Neisseria* species. Pathogens 9:10. https://doi.org/10.3390/pathogens9010010

43. Scaria J, Suzuki H, Ptak CP, et al (2015) Comparative genomic and phenomic analysis of *Clostridium difficile* and *Clostridium sordellii*, two related pathogens with differing host tissue preference. BMC Genomics 16:448. https://doi.org/10.1186/s12864-015-1663-5

44. Kim JY, Kim YB, Song HS, et al (2017) Genomic analysis of a pathogenic bacterium, *Paeniclostridium sordellii* CBA7122 containing the highest number of rRNA Operons, isolated from a human stool sample. Front Pharmacol 8:840. https://doi.org/10.3389/fphar.2017.00840

45. Wang Y, Shu Y, Sun Y, et al (2024) Acute nitrite exposure causes gut microbiota dysbacteriosis and proliferation of pathogenic *Photobacterium* in shrimp. Ecotoxicol Environ Saf 283:116829. https://doi.org/10.1016/j.ecoenv.2024.116829

46. Deng Y, Zhang Y, Chen H, et al (2020) Gut–liver immune response and gut microbiota profiling reveal the pathogenic mechanisms of *Vibrio harveyi* in Pearl Gentian Grouper (*Epinephelus lanceolatus* ♂ × *E. fuscoguttatus* ♀). Front Immunol 11:607754. https://doi.org/10.3389/fimmu.2020.607754

47. Janda JM (2025) A group with emerging potential in the clinical and public health realms: the genus *Providencia*. Infect Dis 58:699–725. https://doi.org/10.1080/23744235.2025.2509007

48. Klein JA, Predeus A V., Greissl AR, et al (2024) Pathogenic diversification of the gut commensal *Providencia alcalifaciens* via acquisition of a second type III secretion system. Infect Immun 92:e00314-24. https://doi.org/10.1128/iai.00314-24

49. Yuan C, Wei Y, Zhang S, et al (2020) Comparative genomic analysis reveals genetic mechanisms of the variety of pathogenicity, antibiotic resistance, and environmental adaptation of *Providencia* genus. Front Microbiol 11:572642. https://doi.org/10.3389/fmicb.2020.572642

50. Kim JM, Rim JH, Kim DH, et al (2021) Microbiome analysis reveals that *Ralstonia* is responsible for decreased renal function in patients with ulcerative colitis. Clin Transl Med 11:e322. https://doi.org/10.1002/ctm2.322

51. Ryan MP, Adley CC (2014) *Ralstonia* spp.: Emerging global opportunistic pathogens. European Journal of Clinical Microbiology and Infectious Diseases 33:291–304. https://doi.org/10.1007/s10096-013-1975-9

52. Zhang-Sun W, Tercé F, Burcelin R, et al (2019) Structure function relationships in three lipids A from the *Ralstonia* genus rising in obese patients. Biochimie 159:72–80. https://doi.org/10.1016/j.biochi.2019.01.015

53. Liu Q, Wang J, Yao Y, et al (2025) Intratumor *Rhodococcus* sp. B513 drives DEN-induced hepatocellular carcinoma progression by modulating gut microbiota and angiogenesis. Curr Res Microb Sci 9:100428. https://doi.org/10.1016/j.crmicr.2025.100428

54. Lin X, Abdalla M, Yang J, et al (2023) Relationship between gut microbiota dysbiosis and immune indicator in children with sepsis. BMC Pediatr 23:516. https://doi.org/10.1186/s12887-023-04349-8

55. Yang W, Ansari AR, Niu X, et al (2022) Interaction between gut microbiota dysbiosis and lung infection as gut-lung axis caused by *Streptococcus suis* in mouse model. Microbiol Res 261:127047. https://doi.org/10.1016/j.micres.2022.127047

56. Krzyściak W, Pluskwa KK, Jurczak A, Kościelniak D (2013) The pathogenicity of the *Streptococcus* genus. European Journal of Clinical Microbiology and Infectious Diseases 32:1361–1376. https://doi.org/10.1007/s10096-013-1914-9

57. Syed S, Viazmina L, Mager R, et al (2020) Streptococci and the complement system: Interplay during infection, inflammation and autoimmunity. FEBS Lett 594:2570–2585. https://doi.org/10.1002/1873-3468.13872

58. Avire NJ, Whiley H, Ross K (2021) A review of *Streptococcus pyogenes*: public health risk factors, prevention and control. Pathogens 10:248. https://doi.org/10.3390/pathogens10020248

59. Santos Junior MN, Macêdo Neres NS de, Campos GB, et al (2021) A review of *Ureaplasma diversum*: A representative of the Mollicute class associated with reproductive and respiratory disorders in cattle. Front Vet Sci 8:572171. https://doi.org/10.3389/fvets.2021.572171

60. Kokkayil P, Dhawan B (2015) *Ureaplasma*: Current perspectives. Indian J Med Microbiol 33:205–214. https://doi.org/10.4103/0255-0857.154850

61. Teixeira CG, Fusieger A, Milião GL, et al (2021) *Weissella*: An emerging bacterium with promising health benefits. Probiotics Antimicrob Proteins 13:915–925. https://doi.org/10.1007/s12602-021-09751-1

62. Park HE, Kang KW, Kim BS, et al (2017) Immunomodulatory potential of *Weissella cibaria* in aged C57BL/6J mice. J Microbiol Biotechnol 27:2094–2103. https://doi.org/10.4014/jmb.1708.08016

63. Magda M, Bettoni S, Laabei M, et al (2022) Clinical isolates of *Acinetobacter spp.* are highly serum resistant despite efficient recognition by the complement system. Front Immunol 13:814193. https://doi.org/10.3389/fimmu.2022.814193

64. Glover JS, Browning BD, Ticer TD, et al (2022) *Acinetobacter calcoaceticus* is well adapted to withstand intestinal stressors and modulate the gut epithelium. Front Physiol 13:880024. https://doi.org/10.3389/fphys.2022.880024

65. Ketter PM, Yu JJ, Guentzel MN, et al (2018) *Acinetobacter baumannii* gastrointestinal colonization is facilitated by secretory IgA which is reductively dissociated by bacterial thioredoxin A. mBio 9:e01298-18. https://doi.org/10.1128/mBio.01298-18

66. Badri M, Nilson B, Ragnarsson S, et al (2019) Clinical and microbiological features of bacteraemia with Gram-positive anaerobic cocci: a population-based retrospective study. Clinical Microbiology and Infection 25:760.e1-760.e6. https://doi.org/10.1016/j.cmi.2018.09.001

67. Cobo F, Navarro-Marí JM (2020) First description of *Anaerococcus octavius* as cause of bacteremia. Anaerobe 61:102130. https://doi.org/10.1016/j.anaerobe.2019.102130

68. Kim N, Hwang JH, Cho YG, et al (2019) First case of *Aureimonas altamirensis* bacteremia in Korea. Ann Lab Med 39:587–589. https://doi.org/10.3343/alm.2019.39.6.587

69. Mendes RE, Denys GA, Fritsche TR, Jones RN (2009) Case report of *Aurantimonas altamirensis* bloodstream infection. J Clin Microbiol 47:514–515. https://doi.org/10.1128/JCM.02171-08

70. Reilly TJ, Calcutt MJ, Wennerdahl LA, et al (2014) Isolation of Aureimonas altamirensis, a Brucella canis–like bacterium, from an edematous canine testicle. Journal of Veterinary Diagnostic Investigation 26:795–798. https://doi.org/10.1177/1040638714554440

71. Ochoa S, Collado L (2021) Enterohepatic *Helicobacter* species–clinical importance, host range, and zoonotic potential. Crit Rev Microbiol 47:728–761. https://doi.org/10.1080/1040841X.2021.1924117

72. Prada CF, Casadiego MA, Freire CCM (2022) Evolution of *Helicobacter* spp: variability of virulence factors and their relationship to pathogenicity. PeerJ 10:e13120. https://doi.org/10.7717/peerj.13120

73. Parija SC (2023) Genus *Mycobacterium* and *Mycobacterium tuberculosis*. In: Textbook of Microbiology and Immunology. Springer Nature, Singapore, pp 419–437

74. Castellana S, De Laurentiis V, Bianco A, et al (2024) *Pannonibacter anstelovis* sp. nov. Isolated from two cases of bloodstream infections in paediatric patients. Microorganisms 12:799. https://doi.org/10.3390/microorganisms12040799

75. Wang M, Zhang X, Jiang T, et al (2017) Liver abscess caused by *Pannonibacter phragmitetus*: case report and literature review. Front Med (Lausanne) 4:48. https://doi.org/10.3389/fmed.2017.00048

76. Okoro C, Agrawal S, Nie Y, et al (2022) Genomic insights from *Paraclostridium bifermentans* HD0315__2: General features and pathogenic potential. Front Microbiol 13:928153. https://doi.org/10.3389/fmicb.2022.928153

77. Tavares-Carreon F, de Anda-Mora K, Rojas-Barrera IC, Andrade A (2023) *Serratia marcescens* antibiotic resistance mechanisms of an opportunistic pathogen: a literature review. PeerJ 11:e14399. https://doi.org/10.7717/peerj.14399

78. Williams DJ, Grimont PAD, Cazares A, et al (2022) The genus *Serratia* revisited by genomics. Nat Commun 13:5195. https://doi.org/10.1038/s41467-022-32929-2

79. Howden BP, Giulieri SG, Wong Fok Lung T, et al (2023) *Staphylococcus aureus* host interactions and adaptation. Nat Rev Microbiol 21:380–395. https://doi.org/10.1038/s41579-023-00852-y

80. Stewart GC (2022) *Staphylococcus*. In: McVey DS, Kennedy M, Chengappa MM, Wilkes R. (eds) Veterinary Microbiology, Fifth. John Wiley & Sons, Inc., pp 231–239

81. Li F, Yu C, Zhao Q, et al (2023) Exploring the intestinal ecosystem: from gut microbiota to associations with subtypes of inflammatory bowel disease. Front Cell Infect Microbiol 13:1304858. https://doi.org/10.3389/fcimb.2023.1304858

82. Lee SH, You HS, Kang HG, et al (2020) Association between altered blood parameters and gut microbiota after synbiotic intake in healthy, elderly Korean women. Nutrients 12:3112. https://doi.org/10.3390/nu12103112

83. Kang I, Youm DJ, Kim I, et al (2024) Identification of *Terrisporobacter* muris isolated from human blood using whole-genome sequencing: A case report. Heliyon 10:e38284. https://doi.org/10.1016/j.heliyon.2024.e38284

84. Könönen E, Wade WG (2015) *Actinomyces* and related organisms in human infections. Clin Microbiol Rev 28:419–442. https://doi.org/10.1128/CMR.00100-14

85. Forbes JD, Chen CY, Knox NC, et al (2018) A comparative study of the gut microbiota in immune-mediated inflammatory diseases - Does a common dysbiosis exist? Microbiome 6:221. https://doi.org/10.1186/s40168-018-0603-4

86. Zhu J, Chen Y, Imre K, et al (2023) Mechanisms of probiotic *Bacillus* against enteric bacterial infections. One Health Advances 1:21. https://doi.org/10.1186/s44280-023-00020-0

87. Liao Y, Wu S, Zhou G, et al (2024) Cellulolytic *Bacillus cereus* produces a variety of short-chain fatty acids and has potential as a probiotic. Microbiol Spectr 12:e03267-23. https://doi.org/10.1128/spectrum.03267-23

88. Cao XY, Aimaier R, Yang J, et al (2023) Effect of *Bacillus subtilis* strain Z15 secondary metabolites on immune function in mice. BMC Genomics 24:273. https://doi.org/10.1186/s12864-023-09313-5

89. López-Moreno A, Carbonne C, Kropp C, et al (2025) Characterisation of potential anti-inflammatory next-generation probiotics resistant to bisphenol A. Benef Microbes 16:91–107. https://doi.org/10.1163/18762891-bja00041

90. Shimizu K, Hirata H, Tokuhira N, et al (2024) Dysbiosis of gut microbiota in patients with severe COVID ‐19 . Acute Medicine & Surgery 11:e923. https://doi.org/10.1002/ams2.923

91. Ryan MP, Pembroke JT (2018) *Brevundimonas spp*: Emerging global opportunistic pathogens. Virulence 9:480–493. https://doi.org/10.1080/21505594.2017.1419116

92. Szabó BG, Kiss R, Makra N, et al (2022) Composition and changes of blood microbiota in adult patients with community-acquired sepsis: A pilot study from bench to bedside. Front Cell Infect Microbiol 12:1067476. https://doi.org/10.3389/fcimb.2022.1067476

93. Nemes-Nikodém É, Gyurok GP, Dunai ZA, et al (2024) Relationship between gut, blood, aneurysm wall and thrombus microbiome in abdominal aortic aneurysm patients. Int J Mol Sci 25:8844. https://doi.org/10.3390/ijms25168844

94. Lawrence G, Midtervoll I, Samuelsen SO, et al (2022) The blood microbiome and its association to cardiovascular disease mortality: case-cohort study. BMC Cardiovasc Disord 22:344. https://doi.org/10.1186/s12872-022-02791-7

95. Lee BH, Nicolas P, Saticioglu IB, et al (2023) Investigation of the genus *Flavobacterium* as a reservoir for fish-pathogenic bacterial species: the case of *Flavobacterium collinsii*. Appl Environ Microbiol 89:e02162-22. https://doi.org/10.1128/aem.02162-22

96. Wahli T, Madsen L (2018) Flavobacteria, a never ending threat for fish: a review. Curr Clin Microbiol Rep 5:26–37. https://doi.org/10.1007/s40588-018-0086-x

97. Zhao H, Han Z, Liu S, et al (2025) A proposed *Lawsonella* species with distinct functional features from *L. clevelandensis* revealed by metagenomics. Genomics 117:111089. https://doi.org/10.1016/j.ygeno.2025.111089

98. Tang L, Zhang Z, Xie R, et al (2018) *Salinisphaera aquimarina* sp. nov., isolated from seawater. Int J Syst Evol Microbiol 68:1130–1134. https://doi.org/10.1099/ijsem.0.002638

99. Janda MJ, Abbott SL (2021) The changing face of the family Enterobacteriaceae (Order: “Enterobacterales”): new members, taxonomic issues, geographic expansion, and new diseases and disease syndromes. Clin Microbiol Rev 34:46–76. https://doi.org/https://doi.org/10.1128/CMR.00174-20.

100. Mohamaden WI, Zhen-Fen Z, Hegab IM, Shang-Li S (2020) Early effects of experimental infection of sheep with *Erwinia persicina*. Adv Anim Vet Sci 9:623–630. https://doi.org/10.17582/journal.aavs/2021/9.5.623.630

101. Dutkiewicz J, Mackiewicz B, Lemieszek MK, et al (2016) *Pantoea agglomerans*: A mysterious bacterium of evil and good. Part III. Deleterious effects: Infections of humans, animals and plants. Annals of Agricultural and Environmental Medicine 23:197–205. https://doi.org/10.5604/12321966.1203878

102. Hurst CJ (2018) Opportunistic Bacteria Associated with Mammalian Livestock Disease. In: Hurst CJ (ed) The Connections Between Ecology and Infectious Disease. Advances in Environmental Microbiology. Springer, pp 185–238

103. Van Ulsen P, Tommassen J (2006) Protein secretion and secreted proteins in pathogenic Neisseriaceae. FEMS Microbiol. Rev. 30:292–319

104. Kock RA, Orynbayev M, Robinson S, et al (2018) Saigas on the brink: Multidisciplinary analysis of the factors influencing mass mortality events. Sci Adv 4:eaao2314. https://doi.org/10.1126/sciadv.aao2314

105. Ku U, Karwasra R (2025) Genomic characterization of Pasteurellaceae strains: Resistance mechanisms, virulence factors, and HGT potential. In Silico Research in Biomedicine 1:100015. https://doi.org/10.1016/j.insi.2025.100015

106. Harper M, Smallman TR, Boyce JD (2022) *Pasteurella*. In: Prescott JF, Rycroft AN, Boyce JD, et al (eds) Pathogenesis of Bacterial Infections in Animals, Fifth Edition. wiley, pp 221–243

107. Crosby WB, Woolums AR (2022) Pasteurellaceae: *Avibacterium, bibersteinia, mannheimia, and pasteurella*. In: McVey DS, Kennedy M, Chengappa MM, Wilkes R (eds) Veterinary Microbiology, Fourth Edition. Wiley Blackwell, pp 108–117

108. Mühldorfer K, Speck S, Wibbelt G (2014) Proposal of *Vespertiliibacter pulmonis* gen. nov., sp. nov. and two genomospecies as new members of the family Pasteurellaceae isolated from European bats. Int J Syst Evol Microbiol 64:2424–2430. https://doi.org/10.1099/ijs.0.062786-0

109. Helmick KE, Heard DJ, Richey L, et al (2004) A *Pasteurella*-like bacterium associated with pneumonia in captive megachiropterans. Journal of Zoo and Wildlife Medicine 35:88–93. https://doi.org/10.1638/01-083

110. Liu H, Zhang H, Yu Q, et al (2023) Lead induced structural and functional damage and microbiota dysbiosis in the intestine of crucian carp (*Carassius auratus*). Front Microbiol 14:1239323. https://doi.org/10.3389/fmicb.2023.1239323

111. Liu H, Fu S, Zhang S, et al (2020) Lead induces structural damage, microbiota dysbiosis and cell apoptosis in the intestine of juvenile bighead carp (*Hypophthalmichthys nobilis*). Aquaculture 528:735573. https://doi.org/10.1016/j.aquaculture.2020.735573

112. Zubova K V., Kuznetsova VA, Kanevsky M V., et al (2025) Biological properties and pathogenetic potential of weeksellaceae family bacteria. Russian Journal of Infection and Immunity 15:505–516. https://doi.org/10.15789/2220-7619-BPA-17859

113. Imhoff JF (2020) *Blastochloris*. In: Trujillo ME, Dedysh S, DeVos P, et al (eds) Bergey’s Manual of Systematics of Archaea and Bacteria. Wiley, pp 1–8

114. Duan Y, Huang J, Wang Y, Zhang J (2020) Characterization of bacterial community in intestinal and rearing water of *Penaeus monodon* differing growth performances in outdoor and indoor ponds. Aquac Res 51:4279–4289. https://doi.org/10.1111/are.14770

115. Xv K, Zhang S, Pang A, et al (2024) White feces syndrome is closely related with hypoimmunity and dysbiosis in *Litopenaeus vannamei*. Aquac Rep 38:102329. https://doi.org/10.1016/j.aqrep.2024.102329

116. Boopathi S, Meenatchi R, Brindangnanam P, et al (2023) Microbiome analysis of *Litopenaeus vannamei* reveals *Vibrio* as main risk factor of white faeces syndrome. Aquaculture 576:739829. https://doi.org/10.1016/j.aquaculture.2023.739829

117. Chiriac MC, Haber M, Salcher MM (2023) Adaptive genetic traits in pelagic freshwater microbes. Environ Microbiol 25:606–641. https://doi.org/10.1111/1462-2920.16313

118. Kushkevych I, Procházka J, Gajdács M, et al (2021) Molecular physiology of anaerobic phototrophic purple and green sulfur bacteria. Int J Mol Sci 22:6398. https://doi.org/10.3390/ijms22126398

119. Ma T, Xue H, Piao C, et al (2023) Phylogenomic reappraisal of the family Rhizobiaceae at the genus and species levels, including the description of *Ectorhizobium quercum* gen. nov., sp. nov. Front Microbiol 14:1207256. https://doi.org/10.3389/fmicb.2023.1207256

120. Pecyna P, Gabryel M, Mankowska-Wierzbicka D, et al (2023) Gender influences gut microbiota among patients with irritable bowel syndrome. Int J Mol Sci 24:10424. https://doi.org/10.3390/ijms241310424

121. Li Y, Zhang D, Bo D, et al (2024) A taxonomic note on the order Caryophanales: description of 12 novel families and emended description of 21 families. Int J Syst Evol Microbiol 74:006539. https://doi.org/10.1099/ijsem.0.006539

122. Bassene H, Niang EHA, Fenollar F, et al (2020) Role of plants in the transmission of *Asaia sp.*, which potentially inhibit the *Plasmodium* sporogenic cycle in *Anopheles* mosquitoes. Sci Rep 10:7144. https://doi.org/10.1038/s41598-020-64163-5

123. Crotti E, Damiani C, Pajoro M, et al (2009) Asaia, a versatile acetic acid bacterial symbiont, capable of cross-colonizing insects of phylogenetically distant genera and orders. Environ Microbiol 11:3252–3264. https://doi.org/10.1111/j.1462-2920.2009.02048.x

124. Cappelli A, Damiani C, Mancini MV, et al (2019) *Asaia* activates immune genes in mosquito eliciting an anti-plasmodium response: Implications in malaria control. Front Genet 10:836. https://doi.org/10.3389/fgene.2019.00836

125. Mancini MV, Damiani C, Short SM, et al (2020) Inhibition of *Asaia* in adult mosquitoes causes male-specific mortality and diverse transcriptome changes. Pathogens 9:380. https://doi.org/10.3390/pathogens9050380

126. Chouaia B, Rossi P, Epis S, et al (2012) Delayed larval development in *Anopheles* mosquitoes deprived of *Asaia* bacterial symbionts. BMC Microbiol 12:52. https://doi.org/10.1186/1471-2180-12-S1-S2

127. Ni J, Ren L, Liang Y, et al (2025) Modulatory effects of selenium nanoparticles on gut microbiota and metabolites of juvenile Nile tilapia (*Oreochromis niloticus*) by microbiome-metabolomic analysis. Aquac Rep 40:102627. https://doi.org/10.1016/j.aqrep.2025.102627

128. Ravin N V, Rakitin AL, Ivanova AA, et al (2018) Genome analysis of *Fimbriiglobus ruber* SP5 T, a Planctomycete with confirmed chitinolytic capability. Appl Environ Microbiol 84:e02645-17. https://doi.org/https://doi.org/10.1128/AEM.02645-17

129. Pokorný J, Vondrášková A, Wipplingerová M, Kaštovský J (2025) Four novel taxa of cyanobacteria from a unique thermal cave habitat in Vromoner Canyon, Albania. J Phycol 61:1394–1422. https://doi.org/10.1111/jpy.70082

130. Andrade A, Ab S, Carlos L, et al (2024) Primer registro de *Limnothrix vacuolifera* y *Limnothrix planktonica* (Cyanobacteria) en la Amazonia colombiana y su actividad antimicrobiana. Biota Colomb 25:e1171. https://doi.org/10.21068/c001

131. Albakistani EA, Nwosu FC, Furgason C, et al (2022) Seasonal dynamics of methanotrophic bacteria in a boreal oil sands end pit lake. Appl Environ Microbiol 88:e01455-21. https://doi.org/https://doi.org/10.1128/aem.01455-21

132. Humphrey CE, Burnett N, Dubey S, Kyndt JA (2022) Genomic and phylogenetic characterization of *Rhodopseudomonas infernalis* sp. nov., Isolated from the hell creek watershed (Nebraska). Microorganisms 10:2024. https://doi.org/10.3390/microorganisms10102024

133. Wang S, Meade A, Lam H-M, Luo H (2020) Evolutionary timeline and genomic plasticity underlying the lifestyle diversity in Rhizobiales. mSystems 5:e00438-20. https://doi.org/10.1128/msystems.00438-20
