# Supplementary material
Source: Research Square preprint supplement (doi:10.21203/rs.3.rs-9440532/v1)
Supplement: Supplementary file 2 [file 698e845a69da2d03c887a430.xlsx]

## Sheet: Structural_zero_female_BKA_low
	Taxon	species	Low	High
1	Sumerlaea_ASV2281	Sumerlaea_ASV2281	Absence	Presence
2	Unclassified_Calditrichaceae_6_ASV2976	Unclassified_Calditrichaceae_6_ASV2976	Absence	Presence
3	Unclassified_Kapabacteriales_3_ASV3669	Unclassified_Kapabacteriales_3_ASV3669	Absence	Presence
4	Unclassified_MAT-CR-H6-H10_2_ASV3818	Unclassified_MAT-CR-H6-H10_2_ASV3818	Absence	Presence
5	Unclassified_Balneolaceae_16_ASV2764	Unclassified_Balneolaceae_16_ASV2764	Absence	Presence
6	Unclassified_Balneolaceae_26_ASV2775	Unclassified_Balneolaceae_26_ASV2775	Absence	Presence
7	Unclassified_Balneolaceae_4_ASV2790	Unclassified_Balneolaceae_4_ASV2790	Absence	Presence
8	Unclassified_Balneolaceae_49_ASV2800	Unclassified_Balneolaceae_49_ASV2800	Absence	Presence
9	Unclassified_Balneolaceae_55_ASV2807	Unclassified_Balneolaceae_55_ASV2807	Absence	Presence
10	Unclassified_Balneolaceae_36_ASV2786	Unclassified_Balneolaceae_36_ASV2786	Absence	Presence
11	Unclassified_Balneolaceae_50_ASV2802	Unclassified_Balneolaceae_50_ASV2802	Absence	Presence
12	Unclassified_Balneolaceae_14_ASV2762	Unclassified_Balneolaceae_14_ASV2762	Absence	Presence
13	Unclassified_Balneolaceae_5_ASV2801	Unclassified_Balneolaceae_5_ASV2801	Absence	Presence
14	Unclassified_Balneolaceae_67_ASV2820	Unclassified_Balneolaceae_67_ASV2820	Absence	Presence
15	MAT-CR-P4-C12_ASV1337	MAT-CR-P4-C12_ASV1337	Absence	Presence
16	Unclassified_Balneolaceae_12_ASV2760	Unclassified_Balneolaceae_12_ASV2760	Absence	Presence
17	Unclassified_Balneolaceae_34_ASV2784	Unclassified_Balneolaceae_34_ASV2784	Absence	Presence
18	Unclassified_vadinHA49_17_ASV4875	Unclassified_vadinHA49_17_ASV4875	Absence	Presence
19	Unclassified_Bacteroidia_1_ASV2751	Unclassified_Bacteroidia_1_ASV2751	Absence	Presence
20	Unclassified_Sphingobacteriaceae_2_ASV4743	Unclassified_Sphingobacteriaceae_2_ASV4743	Absence	Presence
21	Sphingobacterium_ASV2115	Sphingobacterium_ASV2115	Absence	Presence
22	Sphingobacterium_ASV2114	Sphingobacterium_ASV2114	Absence	Presence
23	Pedobacter_ASV1614	Pedobacter_ASV1614	Absence	Presence
24	Pedobacter_ASV1613	Pedobacter_ASV1613	Absence	Presence
25	Unclassified_Cryomorphaceae_3_ASV3147	Unclassified_Cryomorphaceae_3_ASV3147	Absence	Presence
26	Unclassified_Cryomorphaceae_4_ASV3148	Unclassified_Cryomorphaceae_4_ASV3148	Absence	Presence
27	Paludibacter_ASV1581	Paludibacter_ASV1581	Absence	Presence
28	Unclassified_Bacteroidales_RF16_group_ASV268	Unclassified_Bacteroidales_RF16_group_ASV268	Absence	Presence
29	Unclassified_NS11-12_marine_group_2_ASV3986	Unclassified_NS11-12_marine_group_2_ASV3986	Absence	Presence
30	Unclassified_Bacteroidia_6_ASV2756	Unclassified_Bacteroidia_6_ASV2756	Absence	Presence
31	Unclassified_Sphingobacteriales_2_ASV4746	Unclassified_Sphingobacteriales_2_ASV4746	Absence	Presence
32	Unclassified_Marinilabiliaceae_4_ASV3802	Unclassified_Marinilabiliaceae_4_ASV3802	Absence	Presence
33	Unclassified_Marinilabiliaceae_14_ASV3797	Unclassified_Marinilabiliaceae_14_ASV3797	Absence	Presence
34	Unclassified_Bacteroidales_1_ASV2709	Unclassified_Bacteroidales_1_ASV2709	Absence	Presence
35	Unclassified_Lentimicrobiaceae_3_ASV3760	Unclassified_Lentimicrobiaceae_3_ASV3760	Absence	Presence
36	Unclassified_Lentimicrobiaceae_15_ASV3757	Unclassified_Lentimicrobiaceae_15_ASV3757	Absence	Presence
37	Unclassified_Lentimicrobiaceae_1_ASV3751	Unclassified_Lentimicrobiaceae_1_ASV3751	Absence	Presence
38	Unclassified_Sphingobacteriaceae_1_ASV4742	Unclassified_Sphingobacteriaceae_1_ASV4742	Absence	Presence
39	Phaeodactylibacter_ASV1650	Phaeodactylibacter_ASV1650	Absence	Presence
40	Unclassified_Saprospiraceae_12_ASV4529	Unclassified_Saprospiraceae_12_ASV4529	Absence	Presence
41	Unclassified_Saprospiraceae_9_ASV4582	Unclassified_Saprospiraceae_9_ASV4582	Absence	Presence
42	Unclassified_Saprospiraceae_7_ASV4580	Unclassified_Saprospiraceae_7_ASV4580	Absence	Presence
43	Phaeodactylibacter_ASV1634	Phaeodactylibacter_ASV1634	Absence	Presence
44	Unclassified_Saprospiraceae_29_ASV4547	Unclassified_Saprospiraceae_29_ASV4547	Absence	Presence
45	Unclassified_Saprospiraceae_34_ASV4553	Unclassified_Saprospiraceae_34_ASV4553	Absence	Presence
46	Unclassified_Saprospiraceae_1_ASV4526	Unclassified_Saprospiraceae_1_ASV4526	Absence	Presence
47	Unclassified_Saprospiraceae_33_ASV4552	Unclassified_Saprospiraceae_33_ASV4552	Absence	Presence
48	Unclassified_Chitinophagaceae_6_ASV3029	Unclassified_Chitinophagaceae_6_ASV3029	Absence	Presence
49	Cnuella_ASV629	Cnuella_ASV629	Absence	Presence
50	Cnuella_ASV628	Cnuella_ASV628	Absence	Presence
51	Cnuella_ASV627	Cnuella_ASV627	Absence	Presence
52	Cnuella_ASV630	Cnuella_ASV630	Absence	Presence
53	Unclassified_Chitinophagaceae_7_ASV3030	Unclassified_Chitinophagaceae_7_ASV3030	Absence	Presence
54	Unclassified_Chitinophagaceae_20_ASV3022	Unclassified_Chitinophagaceae_20_ASV3022	Absence	Presence
55	Unclassified_Chitinophagaceae_5_ASV3028	Unclassified_Chitinophagaceae_5_ASV3028	Absence	Presence
56	Flavisolibacter_ASV939	Flavisolibacter_ASV939	Absence	Presence
57	Flavisolibacter_ASV942	Flavisolibacter_ASV942	Absence	Presence
58	Flavisolibacter_ASV946	Flavisolibacter_ASV946	Absence	Presence
59	Flavisolibacter_ASV938	Flavisolibacter_ASV938	Absence	Presence
60	Unclassified_Chitinophagaceae_22_ASV3024	Unclassified_Chitinophagaceae_22_ASV3024	Absence	Presence
61	Fluviicola_ASV961	Fluviicola_ASV961	Absence	Presence
62	Unclassified_Sphingobacteriales_1_ASV4745	Unclassified_Sphingobacteriales_1_ASV4745	Absence	Presence
63	Unclassified_SB-5_11_ASV4606	Unclassified_SB-5_11_ASV4606	Absence	Presence
64	Unclassified_SB-5_3_ASV4618	Unclassified_SB-5_3_ASV4618	Absence	Presence
65	Unclassified_SB-5_16_ASV4611	Unclassified_SB-5_16_ASV4611	Absence	Presence
66	Unclassified_Bacteroidales_3_ASV2717	Unclassified_Bacteroidales_3_ASV2717	Absence	Presence
67	Unclassified_Bacteroidetes_BD2-2_8_ASV2747	Unclassified_Bacteroidetes_BD2-2_8_ASV2747	Absence	Presence
68	Unclassified_Bacteroidetes_BD2-2_3_ASV2742	Unclassified_Bacteroidetes_BD2-2_3_ASV2742	Absence	Presence
69	Unclassified_Bacteroidetes_BD2-2_23_ASV2739	Unclassified_Bacteroidetes_BD2-2_23_ASV2739	Absence	Presence
70	Unclassified_Bacteroidetes_BD2-2_13_ASV2728	Unclassified_Bacteroidetes_BD2-2_13_ASV2728	Absence	Presence
71	Unclassified_Bacteroidetes_BD2-2_24_ASV2740	Unclassified_Bacteroidetes_BD2-2_24_ASV2740	Absence	Presence
72	Unclassified_Bacteroidetes_BD2-2_2_ASV2735	Unclassified_Bacteroidetes_BD2-2_2_ASV2735	Absence	Presence
73	Unclassified_SB-5_12_ASV4607	Unclassified_SB-5_12_ASV4607	Absence	Presence
74	Unclassified_Flavobacteriaceae_7_ASV3448	Unclassified_Flavobacteriaceae_7_ASV3448	Absence	Presence
75	NS5_marine_group_ASV1523	NS5_marine_group_ASV1523	Absence	Presence
76	Unclassified_Flavobacteriaceae_57_ASV3444	Unclassified_Flavobacteriaceae_57_ASV3444	Absence	Presence
77	Cloacibacterium_ASV563	Cloacibacterium_ASV563	Absence	Presence
78	Bergeyella_ASV312	Bergeyella_ASV312	Absence	Presence
79	Bergeyella_ASV311	Bergeyella_ASV311	Absence	Presence
80	Unclassified_Weeksellaceae_11_ASV4932	Unclassified_Weeksellaceae_11_ASV4932	Absence	Presence
81	Moheibacter_ASV1407	Moheibacter_ASV1407	Absence	Presence
82	Unclassified_Weeksellaceae_2_ASV4935	Unclassified_Weeksellaceae_2_ASV4935	Absence	Presence
83	Unclassified_Weeksellaceae_6_ASV4939	Unclassified_Weeksellaceae_6_ASV4939	Absence	Presence
84	Unclassified_Weeksellaceae_4_ASV4937	Unclassified_Weeksellaceae_4_ASV4937	Absence	Presence
85	Apibacter_ASV195	Apibacter_ASV195	Absence	Presence
86	Unclassified_Weeksellaceae_9_ASV4942	Unclassified_Weeksellaceae_9_ASV4942	Absence	Presence
87	Flavobacterium_ASV951	Flavobacterium_ASV951	Absence	Presence
88	Myroides_ASV1459	Myroides_ASV1459	Absence	Presence
89	Flavobacterium_ASV947	Flavobacterium_ASV947	Absence	Presence
90	Unclassified_Flavobacteriaceae_42_ASV3428	Unclassified_Flavobacteriaceae_42_ASV3428	Absence	Presence
91	Capnocytophaga_ASV491	Capnocytophaga_ASV491	Absence	Presence
92	Ulvibacter_ASV2410	Ulvibacter_ASV2410	Absence	Presence
93	Unclassified_Flavobacteriaceae_24_ASV3408	Unclassified_Flavobacteriaceae_24_ASV3408	Absence	Presence
94	Unclassified_F082_2_ASV3375	Unclassified_F082_2_ASV3375	Absence	Presence
95	Rikenellaceae_RC9_gut_group_ASV1881	Rikenellaceae_RC9_gut_group_ASV1881	Absence	Presence
96	Rikenellaceae_RC9_gut_group_ASV1884	Rikenellaceae_RC9_gut_group_ASV1884	Absence	Presence
97	Rikenellaceae_RC9_gut_group_ASV1883	Rikenellaceae_RC9_gut_group_ASV1883	Absence	Presence
98	Rikenellaceae_RC9_gut_group_ASV1879	Rikenellaceae_RC9_gut_group_ASV1879	Absence	Presence
99	Rikenellaceae_RC9_gut_group_ASV1880	Rikenellaceae_RC9_gut_group_ASV1880	Absence	Presence
100	Rikenellaceae_RC9_gut_group_ASV1882	Rikenellaceae_RC9_gut_group_ASV1882	Absence	Presence
101	Rikenellaceae_RC9_gut_group_ASV1878	Rikenellaceae_RC9_gut_group_ASV1878	Absence	Presence
102	Rikenellaceae_RC9_gut_group_ASV1877	Rikenellaceae_RC9_gut_group_ASV1877	Absence	Presence
103	Unclassified_F082_3_ASV3376	Unclassified_F082_3_ASV3376	Absence	Presence
104	Unclassified_F082_1_ASV3374	Unclassified_F082_1_ASV3374	Absence	Presence
105	Unclassified_p-251-o5_ASV1560	Unclassified_p-251-o5_ASV1560	Absence	Presence
106	Alloprevotella_ASV139	Alloprevotella_ASV139	Absence	Presence
107	Prevotellaceae_UCG-003_ASV1723	Prevotellaceae_UCG-003_ASV1723	Absence	Presence
108	Prevotellaceae_UCG-003_ASV1722	Prevotellaceae_UCG-003_ASV1722	Absence	Presence
109	Prevotella_9_ASV1717	Prevotella_9_ASV1717	Absence	Presence
110	Prevotella_ASV1714	Prevotella_ASV1714	Absence	Presence
111	Prevotella_7_ASV1716	Prevotella_7_ASV1716	Absence	Presence
112	Prevotella_ASV1713	Prevotella_ASV1713	Absence	Presence
113	Proteiniphilum_ASV1730	Proteiniphilum_ASV1730	Absence	Presence
114	Bacteroides_ASV276	Bacteroides_ASV276	Absence	Presence
115	Prevotellaceae_UCG-004_ASV1724	Prevotellaceae_UCG-004_ASV1724	Absence	Presence
116	Prevotellaceae_UCG-004_ASV1725	Prevotellaceae_UCG-004_ASV1725	Absence	Presence
117	Prevotellaceae_UCG-004_ASV1726	Prevotellaceae_UCG-004_ASV1726	Absence	Presence
118	Bacteroides_ASV270	Bacteroides_ASV270	Absence	Presence
119	Unclassified_Dysgonomonadaceae_1_ASV3311	Unclassified_Dysgonomonadaceae_1_ASV3311	Absence	Presence
120	Unclassified_Muribaculaceae_4_ASV3909	Unclassified_Muribaculaceae_4_ASV3909	Absence	Presence
121	Unclassified_Muribaculaceae_3_ASV3908	Unclassified_Muribaculaceae_3_ASV3908	Absence	Presence
122	Unclassified_Cytophagales_1_ASV3204	Unclassified_Cytophagales_1_ASV3204	Absence	Presence
123	Unclassified_Cytophagales_10_ASV3205	Unclassified_Cytophagales_10_ASV3205	Absence	Presence
124	Unclassified_Cytophagales_5_ASV3210	Unclassified_Cytophagales_5_ASV3210	Absence	Presence
125	Hymenobacter_ASV1100	Hymenobacter_ASV1100	Absence	Presence
126	Hymenobacter_ASV1107	Hymenobacter_ASV1107	Absence	Presence
127	Hymenobacter_ASV1102	Hymenobacter_ASV1102	Absence	Presence
128	Unclassified_Cytophagales_2_ASV3207	Unclassified_Cytophagales_2_ASV3207	Absence	Presence
129	Unclassified_Cytophagales_8_ASV3213	Unclassified_Cytophagales_8_ASV3213	Absence	Presence
130	Algoriphagus_ASV120	Algoriphagus_ASV120	Absence	Presence
131	Algoriphagus_ASV123	Algoriphagus_ASV123	Absence	Presence
132	Dyadobacter_ASV852	Dyadobacter_ASV852	Absence	Presence
133	Unclassified_Spirosomaceae_1_ASV4778	Unclassified_Spirosomaceae_1_ASV4778	Absence	Presence
134	Larkinella_ASV1184	Larkinella_ASV1184	Absence	Presence
135	Unclassified_Spirosomaceae_2_ASV4779	Unclassified_Spirosomaceae_2_ASV4779	Absence	Presence
136	OLB12_ASV1542	OLB12_ASV1542	Absence	Presence
137	Unclassified_Flavobacteriales_2_ASV3452	Unclassified_Flavobacteriales_2_ASV3452	Absence	Presence
138	Unclassified_Cyclobacteriaceae_21_ASV3185	Unclassified_Cyclobacteriaceae_21_ASV3185	Absence	Presence
139	Unclassified_Cyclobacteriaceae_14_ASV3177	Unclassified_Cyclobacteriaceae_14_ASV3177	Absence	Presence
140	Unclassified_Cyclobacteriaceae_23_ASV3187	Unclassified_Cyclobacteriaceae_23_ASV3187	Absence	Presence
141	Unclassified_Cyclobacteriaceae_15_ASV3178	Unclassified_Cyclobacteriaceae_15_ASV3178	Absence	Presence
142	Unclassified_Rhodothermaceae_4_ASV4476	Unclassified_Rhodothermaceae_4_ASV4476	Absence	Presence
143	Unclassified_Rhodothermaceae_5_ASV4477	Unclassified_Rhodothermaceae_5_ASV4477	Absence	Presence
144	Salinibacter_ASV1975	Salinibacter_ASV1975	Absence	Presence
145	Salinibacter_ASV1986	Salinibacter_ASV1986	Absence	Presence
146	Unclassified_Rhodothermaceae_12_ASV4462	Unclassified_Rhodothermaceae_12_ASV4462	Absence	Presence
147	Unclassified_Rhodothermaceae_13_ASV4463	Unclassified_Rhodothermaceae_13_ASV4463	Absence	Presence
148	Unclassified_Zixibacteria_29_ASV4994	Unclassified_Zixibacteria_29_ASV4994	Absence	Presence
149	Unclassified_Zixibacteria_7_ASV4999	Unclassified_Zixibacteria_7_ASV4999	Absence	Presence
150	Unclassified_WCHB1-41_10_ASV4913	Unclassified_WCHB1-41_10_ASV4913	Absence	Presence
151	Unclassified_WCHB1-41_6_ASV4918	Unclassified_WCHB1-41_6_ASV4918	Absence	Presence
152	Unclassified_Desulfobacterales_2_ASV3234	Unclassified_Desulfobacterales_2_ASV3234	Absence	Presence
153	Unclassified_Subgroup_17_ASV2269	Unclassified_Subgroup_17_ASV2269	Absence	Presence
154	Unclassified_0319-6G20_4_ASV2422	Unclassified_0319-6G20_4_ASV2422	Absence	Presence
155	Unclassified_0319-6G20_3_ASV2421	Unclassified_0319-6G20_3_ASV2421	Absence	Presence
156	Unclassified_Spirochaetaceae_17_ASV4769	Unclassified_Spirochaetaceae_17_ASV4769	Absence	Presence
157	Candidatus_Omnitrophus_ASV452	Candidatus_Omnitrophus_ASV452	Absence	Presence
158	Candidatus_Omnitrophus_ASV450	Candidatus_Omnitrophus_ASV450	Absence	Presence
159	Candidatus_Omnitrophus_ASV451	Candidatus_Omnitrophus_ASV451	Absence	Presence
160	Unclassified_Spirochaetaceae_11_ASV4763	Unclassified_Spirochaetaceae_11_ASV4763	Absence	Presence
161	Sediminispirochaeta_ASV2056	Sediminispirochaeta_ASV2056	Absence	Presence
162	Spirochaeta_ASV2152	Spirochaeta_ASV2152	Absence	Presence
163	Spirochaeta_2_ASV2177	Spirochaeta_2_ASV2177	Absence	Presence
164	Spirochaeta_ASV2158	Spirochaeta_ASV2158	Absence	Presence
165	Spirochaeta_2_ASV2198	Spirochaeta_2_ASV2198	Absence	Presence
166	Spirochaeta_2_ASV2207	Spirochaeta_2_ASV2207	Absence	Presence
167	Unclassified_Spirochaetaceae_2_ASV4770	Unclassified_Spirochaetaceae_2_ASV4770	Absence	Presence
168	Spirochaeta_2_ASV2212	Spirochaeta_2_ASV2212	Absence	Presence
169	Spirochaeta_2_ASV2211	Spirochaeta_2_ASV2211	Absence	Presence
170	Salinispira_ASV2025	Salinispira_ASV2025	Absence	Presence
171	Treponema_ASV2375	Treponema_ASV2375	Absence	Presence
172	Treponema_ASV2374	Treponema_ASV2374	Absence	Presence
173	Chlamydia_ASV509	Chlamydia_ASV509	Absence	Presence
174	Unclassified_Simkaniaceae_4_ASV4728	Unclassified_Simkaniaceae_4_ASV4728	Absence	Presence
175	Unclassified_Simkaniaceae_2_ASV4726	Unclassified_Simkaniaceae_2_ASV4726	Absence	Presence
176	Unclassified_Pla4_lineage_3_ASV4176	Unclassified_Pla4_lineage_3_ASV4176	Absence	Presence
177	Unclassified_Planctomycetota_12_ASV4207	Unclassified_Planctomycetota_12_ASV4207	Absence	Presence
178	SM1A02_ASV2097	SM1A02_ASV2097	Absence	Presence
179	CL500-3_ASV562	CL500-3_ASV562	Absence	Presence
180	Urania-1B-19_marine_sediment_group_ASV5025	Urania-1B-19_marine_sediment_group_ASV5025	Absence	Presence
181	SM1A02_ASV2095	SM1A02_ASV2095	Absence	Presence
182	SM1A02_ASV2093	SM1A02_ASV2093	Absence	Presence
183	Unclassified_WD2101_soil_group_1_ASV4922	Unclassified_WD2101_soil_group_1_ASV4922	Absence	Presence
184	Unclassified_WD2101_soil_group_3_ASV4924	Unclassified_WD2101_soil_group_3_ASV4924	Absence	Presence
185	Unclassified_WD2101_soil_group_6_ASV4927	Unclassified_WD2101_soil_group_6_ASV4927	Absence	Presence
186	Unclassified_Phycisphaeraceae_8_ASV4121	Unclassified_Phycisphaeraceae_8_ASV4121	Absence	Presence
187	Unclassified_Phycisphaeraceae_16_ASV4110	Unclassified_Phycisphaeraceae_16_ASV4110	Absence	Presence
188	Unclassified_AKAU3564_sediment_group_2_ASV2523	Unclassified_AKAU3564_sediment_group_2_ASV2523	Absence	Presence
189	Unclassified_mle1-8_3_ASV3889	Unclassified_mle1-8_3_ASV3889	Absence	Presence
190	Unclassified_Pla1_lineage_2_ASV4154	Unclassified_Pla1_lineage_2_ASV4154	Absence	Presence
191	Unclassified_Pla1_lineage_1_ASV4153	Unclassified_Pla1_lineage_1_ASV4153	Absence	Presence
192	Unclassified_CCM11a_3_ASV3001	Unclassified_CCM11a_3_ASV3001	Absence	Presence
193	Unclassified_CCM11a_4_ASV3002	Unclassified_CCM11a_4_ASV3002	Absence	Presence
194	Unclassified_Gemmataceae_3_ASV3564	Unclassified_Gemmataceae_3_ASV3564	Absence	Presence
195	Unclassified_Gemmataceae_14_ASV3560	Unclassified_Gemmataceae_14_ASV3560	Absence	Presence
196	Unclassified_Gemmataceae_16_ASV3562	Unclassified_Gemmataceae_16_ASV3562	Absence	Presence
197	Unclassified_Isosphaeraceae_3_ASV3645	Unclassified_Isosphaeraceae_3_ASV3645	Absence	Presence
198	Unclassified_Isosphaeraceae_7_ASV3649	Unclassified_Isosphaeraceae_7_ASV3649	Absence	Presence
199	Tundrisphaera_ASV2390	Tundrisphaera_ASV2390	Absence	Presence
200	Tundrisphaera_ASV2392	Tundrisphaera_ASV2392	Absence	Presence
201	Unclassified_Gemmataceae_15_ASV3561	Unclassified_Gemmataceae_15_ASV3561	Absence	Presence
202	Unclassified_Gemmataceae_9_ASV3570	Unclassified_Gemmataceae_9_ASV3570	Absence	Presence
203	Unclassified_Gemmataceae_13_ASV3559	Unclassified_Gemmataceae_13_ASV3559	Absence	Presence
204	Unclassified_Gemmataceae_1_ASV3555	Unclassified_Gemmataceae_1_ASV3555	Absence	Presence
205	Gemmata_ASV1003	Gemmata_ASV1003	Absence	Presence
206	Zavarzinella_ASV5115	Zavarzinella_ASV5115	Absence	Presence
207	Gemmata_ASV998	Gemmata_ASV998	Absence	Presence
208	Gemmata_ASV997	Gemmata_ASV997	Absence	Presence
209	Unclassified_Planctomycetes_1_ASV4202	Unclassified_Planctomycetes_1_ASV4202	Absence	Presence
210	Unclassified_Planctomycetales_11_ASV4185	Unclassified_Planctomycetales_11_ASV4185	Absence	Presence
211	Unclassified_Gemmataceae_5_ASV3566	Unclassified_Gemmataceae_5_ASV3566	Absence	Presence
212	Rubinisphaera_ASV1933	Rubinisphaera_ASV1933	Absence	Presence
213	SH-PL14_ASV2083	SH-PL14_ASV2083	Absence	Presence
214	Unclassified_Planctomycetales_18_ASV4192	Unclassified_Planctomycetales_18_ASV4192	Absence	Presence
215	Unclassified_Planctomycetales_17_ASV4191	Unclassified_Planctomycetales_17_ASV4191	Absence	Presence
216	SH-PL14_ASV2085	SH-PL14_ASV2085	Absence	Presence
217	Unclassified_Gimesiaceae_2_ASV3586	Unclassified_Gimesiaceae_2_ASV3586	Absence	Presence
218	Unclassified_Planctomycetales_10_ASV4184	Unclassified_Planctomycetales_10_ASV4184	Absence	Presence
219	p-1088-a5_gut_group_ASV1556	p-1088-a5_gut_group_ASV1556	Absence	Presence
220	p-1088-a5_gut_group_ASV1558	p-1088-a5_gut_group_ASV1558	Absence	Presence
221	p-1088-a5_gut_group_ASV1557	p-1088-a5_gut_group_ASV1557	Absence	Presence
222	p-1088-a5_gut_group_ASV1554	p-1088-a5_gut_group_ASV1554	Absence	Presence
223	p-1088-a5_gut_group_ASV1559	p-1088-a5_gut_group_ASV1559	Absence	Presence
224	p-1088-a5_gut_group_ASV1555	p-1088-a5_gut_group_ASV1555	Absence	Presence
225	Unclassified_Pirellulaceae_28_ASV4145	Unclassified_Pirellulaceae_28_ASV4145	Absence	Presence
226	Unclassified_Pirellulaceae_4_ASV4147	Unclassified_Pirellulaceae_4_ASV4147	Absence	Presence
227	Pir4_lineage_ASV1683	Pir4_lineage_ASV1683	Absence	Presence
228	Pir4_lineage_ASV1681	Pir4_lineage_ASV1681	Absence	Presence
229	Pir4_lineage_ASV1678	Pir4_lineage_ASV1678	Absence	Presence
230	Rhodopirellula_ASV1860	Rhodopirellula_ASV1860	Absence	Presence
231	Pirellula_ASV1694	Pirellula_ASV1694	Absence	Presence
232	Pirellula_ASV1686	Pirellula_ASV1686	Absence	Presence
233	Unclassified_Pirellulaceae_24_ASV4141	Unclassified_Pirellulaceae_24_ASV4141	Absence	Presence
234	Unclassified_Pirellulaceae_15_ASV4131	Unclassified_Pirellulaceae_15_ASV4131	Absence	Presence
235	Unclassified_Pirellulaceae_26_ASV4143	Unclassified_Pirellulaceae_26_ASV4143	Absence	Presence
236	Unclassified_Planctomycetota_3_ASV4214	Unclassified_Planctomycetota_3_ASV4214	Absence	Presence
237	Unclassified_OM190_5_ASV4010	Unclassified_OM190_5_ASV4010	Absence	Presence
238	Unclassified_OM190_4_ASV4009	Unclassified_OM190_4_ASV4009	Absence	Presence
239	Unclassified_Pla4_lineage_4_ASV4177	Unclassified_Pla4_lineage_4_ASV4177	Absence	Presence
240	Unclassified_BD7-11_5_ASV2875	Unclassified_BD7-11_5_ASV2875	Absence	Presence
241	Unclassified_BD7-11_2_ASV2872	Unclassified_BD7-11_2_ASV2872	Absence	Presence
242	Unclassified_Pla3_lineage_12_ASV4158	Unclassified_Pla3_lineage_12_ASV4158	Absence	Presence
243	Unclassified_Subgroup_9_1_ASV4817	Unclassified_Subgroup_9_1_ASV4817	Absence	Presence
244	Vicinamibacter_ASV5063	Vicinamibacter_ASV5063	Absence	Presence
245	Unclassified_Vicinamibacteraceae_5_ASV4901	Unclassified_Vicinamibacteraceae_5_ASV4901	Absence	Presence
246	Luteitalea_ASV1281	Luteitalea_ASV1281	Absence	Presence
247	Unclassified_Vicinamibacteraceae_1_ASV4896	Unclassified_Vicinamibacteraceae_1_ASV4896	Absence	Presence
248	Unclassified_Vicinamibacteraceae_2_ASV4898	Unclassified_Vicinamibacteraceae_2_ASV4898	Absence	Presence
249	Verruc-01_ASV5047	Verruc-01_ASV5047	Absence	Presence
250	Verruc-01_ASV5043	Verruc-01_ASV5043	Absence	Presence
251	Opitutus_ASV1551	Opitutus_ASV1551	Absence	Presence
252	Opitutus_ASV1552	Opitutus_ASV1552	Absence	Presence
253	Unclassified_Latescibacteraceae_3_ASV3726	Unclassified_Latescibacteraceae_3_ASV3726	Absence	Presence
254	Unclassified_Vicinamibacterales_7_ASV4910	Unclassified_Vicinamibacterales_7_ASV4910	Absence	Presence
255	Lentisphaera_ASV1235	Lentisphaera_ASV1235	Absence	Presence
256	Unclassified_Lentisphaeria_1_ASV3767	Unclassified_Lentisphaeria_1_ASV3767	Absence	Presence
257	Unclassified_SS1-B-02-17_5_ASV4790	Unclassified_SS1-B-02-17_5_ASV4790	Absence	Presence
258	Unclassified_Aminicenantales_2_ASV2581	Unclassified_Aminicenantales_2_ASV2581	Absence	Presence
259	Chthoniobacter_ASV551	Chthoniobacter_ASV551	Absence	Presence
260	Unclassified_Pedosphaeraceae_3_ASV4081	Unclassified_Pedosphaeraceae_3_ASV4081	Absence	Presence
261	Ellin517_ASV858	Ellin517_ASV858	Absence	Presence
262	Luteolibacter_ASV1289	Luteolibacter_ASV1289	Absence	Presence
263	Unclassified_DEV007_5_ASV3297	Unclassified_DEV007_5_ASV3297	Absence	Presence
264	Unclassified_vadinHA49_18_ASV4876	Unclassified_vadinHA49_18_ASV4876	Absence	Presence
265	Unclassified_Acidobacteriota_8_ASV2492	Unclassified_Acidobacteriota_8_ASV2492	Absence	Presence
266	Unclassified_DS-100_2_ASV3309	Unclassified_DS-100_2_ASV3309	Absence	Presence
267	Unclassified_DS-100_1_ASV3308	Unclassified_DS-100_1_ASV3308	Absence	Presence
268	Unclassified_Subgroup_22_5_ASV4808	Unclassified_Subgroup_22_5_ASV4808	Absence	Presence
269	Unclassified_Latescibacterota_1_ASV3733	Unclassified_Latescibacterota_1_ASV3733	Absence	Presence
270	RB41_ASV1804	RB41_ASV1804	Absence	Presence
271	Blastocatella_ASV323	Blastocatella_ASV323	Absence	Presence
272	Unclassified_Blastocatellaceae_5_ASV2916	Unclassified_Blastocatellaceae_5_ASV2916	Absence	Presence
273	RB41_ASV1801	RB41_ASV1801	Absence	Presence
274	RB41_ASV1802	RB41_ASV1802	Absence	Presence
275	RB41_ASV1806	RB41_ASV1806	Absence	Presence
276	RB41_ASV1808	RB41_ASV1808	Absence	Presence
277	Unclassified_Gitt-GS-136_1_ASV3589	Unclassified_Gitt-GS-136_1_ASV3589	Absence	Presence
278	Unclassified_JG30-KF-CM66_3_ASV3663	Unclassified_JG30-KF-CM66_3_ASV3663	Absence	Presence
279	Unclassified_TK10_3_ASV4863	Unclassified_TK10_3_ASV4863	Absence	Presence
280	Unclassified_TK10_4_ASV4864	Unclassified_TK10_4_ASV4864	Absence	Presence
281	Unclassified_SAR324_clade(Marine_group_B)_11_ASV4591	Unclassified_SAR324_clade(Marine_group_B)_11_ASV4591	Absence	Presence
282	Unclassified_Armatimonadota_2_ASV2658	Unclassified_Armatimonadota_2_ASV2658	Absence	Presence
283	Unclassified_JG30-KF-CM45_3_ASV3658	Unclassified_JG30-KF-CM45_3_ASV3658	Absence	Presence
284	Unclassified_JG30-KF-CM45_2_ASV3657	Unclassified_JG30-KF-CM45_2_ASV3657	Absence	Presence
285	Candidatus_Chlorothrix_ASV420	Candidatus_Chlorothrix_ASV420	Absence	Presence
286	Unclassified_Ardenticatenaceae_1_ASV2632	Unclassified_Ardenticatenaceae_1_ASV2632	Absence	Presence
287	Unclassified_SBR1031_82_ASV4706	Unclassified_SBR1031_82_ASV4706	Absence	Presence
288	Unclassified_SBR1031_65_ASV4687	Unclassified_SBR1031_65_ASV4687	Absence	Presence
289	Unclassified_A4b_3_ASV2452	Unclassified_A4b_3_ASV2452	Absence	Presence
290	Unclassified_A4b_16_ASV2437	Unclassified_A4b_16_ASV2437	Absence	Presence
291	Unclassified_SBR1031_74_ASV4697	Unclassified_SBR1031_74_ASV4697	Absence	Presence
292	Unclassified_SBR1031_12_ASV4629	Unclassified_SBR1031_12_ASV4629	Absence	Presence
293	Unclassified_AKIW781_2_ASV2532	Unclassified_AKIW781_2_ASV2532	Absence	Presence
294	Unclassified_AKIW781_1_ASV2531	Unclassified_AKIW781_1_ASV2531	Absence	Presence
295	Unclassified_SBR1031_1_ASV4626	Unclassified_SBR1031_1_ASV4626	Absence	Presence
296	Unclassified_A4b_5_ASV2456	Unclassified_A4b_5_ASV2456	Absence	Presence
297	Unclassified_A4b_12_ASV2433	Unclassified_A4b_12_ASV2433	Absence	Presence
298	Unclassified_A4b_2_ASV2441	Unclassified_A4b_2_ASV2441	Absence	Presence
299	Unclassified_SBR1031_75_ASV4698	Unclassified_SBR1031_75_ASV4698	Absence	Presence
300	Unclassified_SBR1031_24_ASV4642	Unclassified_SBR1031_24_ASV4642	Absence	Presence
301	Unclassified_SBR1031_71_ASV4694	Unclassified_SBR1031_71_ASV4694	Absence	Presence
302	Unclassified_RBG-13-54-9_ASV1809	Unclassified_RBG-13-54-9_ASV1809	Absence	Presence
303	Flexilinea_ASV954	Flexilinea_ASV954	Absence	Presence
304	Flexilinea_ASV960	Flexilinea_ASV960	Absence	Presence
305	Flexilinea_ASV956	Flexilinea_ASV956	Absence	Presence
306	Flexilinea_ASV959	Flexilinea_ASV959	Absence	Presence
307	Flexilinea_ASV958	Flexilinea_ASV958	Absence	Presence
308	Flexilinea_ASV957	Flexilinea_ASV957	Absence	Presence
309	Unclassified_Ardenticatenales_12_ASV2636	Unclassified_Ardenticatenales_12_ASV2636	Absence	Presence
310	Unclassified_Anaerolineaceae_21_ASV2598	Unclassified_Anaerolineaceae_21_ASV2598	Absence	Presence
311	Thermoflexus_ASV2350	Thermoflexus_ASV2350	Absence	Presence
312	Unclassified_Anaerolineaceae_6_ASV2619	Unclassified_Anaerolineaceae_6_ASV2619	Absence	Presence
313	Unclassified_Anaerolineaceae_28_ASV2605	Unclassified_Anaerolineaceae_28_ASV2605	Absence	Presence
314	Unclassified_Anaerolineaceae_35_ASV2613	Unclassified_Anaerolineaceae_35_ASV2613	Absence	Presence
315	Unclassified_Anaerolineaceae_4_ASV2617	Unclassified_Anaerolineaceae_4_ASV2617	Absence	Presence
316	Unclassified_SAR202_clade_1_ASV4583	Unclassified_SAR202_clade_1_ASV4583	Absence	Presence
317	Unclassified_GIF3_2_ASV3584	Unclassified_GIF3_2_ASV3584	Absence	Presence
318	Leptospira_ASV1242	Leptospira_ASV1242	Absence	Presence
319	Unclassified_Acidobacteriae_1_ASV2481	Unclassified_Acidobacteriae_1_ASV2481	Absence	Presence
320	Unclassified_Acidimicrobiia_1_ASV2479	Unclassified_Acidimicrobiia_1_ASV2479	Absence	Presence
321	Unclassified_Acidimicrobiia_2_ASV2480	Unclassified_Acidimicrobiia_2_ASV2480	Absence	Presence
322	Unclassified_Microtrichales_1_ASV3877	Unclassified_Microtrichales_1_ASV3877	Absence	Presence
323	Unclassified_Microtrichales_5_ASV3881	Unclassified_Microtrichales_5_ASV3881	Absence	Presence
324	Unclassified_Microtrichaceae_1_ASV3874	Unclassified_Microtrichaceae_1_ASV3874	Absence	Presence
325	Unclassified_Actinomarinales_3_ASV2506	Unclassified_Actinomarinales_3_ASV2506	Absence	Presence
326	Unclassified_Actinomarinales_6_ASV2509	Unclassified_Actinomarinales_6_ASV2509	Absence	Presence
327	Unclassified_Actinomarinales_12_ASV2501	Unclassified_Actinomarinales_12_ASV2501	Absence	Presence
328	Unclassified_Actinomarinales_13_ASV2502	Unclassified_Actinomarinales_13_ASV2502	Absence	Presence
329	Unclassified_Actinomarinales_1_ASV2498	Unclassified_Actinomarinales_1_ASV2498	Absence	Presence
330	Aeromicrobium_ASV98	Aeromicrobium_ASV98	Absence	Presence
331	Nocardioides_ASV1501	Nocardioides_ASV1501	Absence	Presence
332	Streptomyces_ASV2259	Streptomyces_ASV2259	Absence	Presence
333	Streptomyces_ASV2258	Streptomyces_ASV2258	Absence	Presence
334	Unclassified_Actinobacteria_1_ASV2493	Unclassified_Actinobacteria_1_ASV2493	Absence	Presence
335	Unclassified_PeM15_6_ASV4089	Unclassified_PeM15_6_ASV4089	Absence	Presence
336	Unclassified_Frankiales_1_ASV3456	Unclassified_Frankiales_1_ASV3456	Absence	Presence
337	Unclassified_Actinobacteriota_1_ASV2496	Unclassified_Actinobacteriota_1_ASV2496	Absence	Presence
338	Unclassified_Frankiales_3_ASV3458	Unclassified_Frankiales_3_ASV3458	Absence	Presence
339	Unclassified_Pseudonocardiaceae_4_ASV4261	Unclassified_Pseudonocardiaceae_4_ASV4261	Absence	Presence
340	Saccharopolyspora_ASV1962	Saccharopolyspora_ASV1962	Absence	Presence
341	Unclassified_Pseudonocardiaceae_7_ASV4264	Unclassified_Pseudonocardiaceae_7_ASV4264	Absence	Presence
342	Unclassified_Pseudonocardiaceae_2_ASV4259	Unclassified_Pseudonocardiaceae_2_ASV4259	Absence	Presence
343	Saccharopolyspora_ASV1961	Saccharopolyspora_ASV1961	Absence	Presence
344	Actinophytocola_ASV86	Actinophytocola_ASV86	Absence	Presence
345	Saccharopolyspora_ASV1960	Saccharopolyspora_ASV1960	Absence	Presence
346	Saccharopolyspora_ASV1963	Saccharopolyspora_ASV1963	Absence	Presence
347	Amycolatopsis_ASV175	Amycolatopsis_ASV175	Absence	Presence
348	Pseudonocardia_ASV1778	Pseudonocardia_ASV1778	Absence	Presence
349	Pseudonocardia_ASV1777	Pseudonocardia_ASV1777	Absence	Presence
350	Actinokineospora_ASV73	Actinokineospora_ASV73	Absence	Presence
351	Actinophytocola_ASV87	Actinophytocola_ASV87	Absence	Presence
352	Rhodococcus_ASV1833	Rhodococcus_ASV1833	Absence	Presence
353	Corynebacterium_ASV664	Corynebacterium_ASV664	Absence	Presence
354	Corynebacterium_ASV660	Corynebacterium_ASV660	Absence	Presence
355	Corynebacterium_ASV670	Corynebacterium_ASV670	Absence	Presence
356	Corynebacterium_ASV652	Corynebacterium_ASV652	Absence	Presence
357	Corynebacterium_ASV650	Corynebacterium_ASV650	Absence	Presence
358	Corynebacterium_ASV677	Corynebacterium_ASV677	Absence	Presence
359	Corynebacterium_ASV656	Corynebacterium_ASV656	Absence	Presence
360	Corynebacterium_ASV654	Corynebacterium_ASV654	Absence	Presence
361	Corynebacterium_ASV674	Corynebacterium_ASV674	Absence	Presence
362	Corynebacterium_ASV648	Corynebacterium_ASV648	Absence	Presence
363	Unclassified_Corynebacteriaceae_2_ASV3140	Unclassified_Corynebacteriaceae_2_ASV3140	Absence	Presence
364	Lawsonella_ASV1194	Lawsonella_ASV1194	Absence	Presence
365	Lawsonella_ASV1192	Lawsonella_ASV1192	Absence	Presence
366	Modestobacter_ASV1403	Modestobacter_ASV1403	Absence	Presence
367	Geodermatophilus_ASV1009	Geodermatophilus_ASV1009	Absence	Presence
368	Geodermatophilus_ASV1010	Geodermatophilus_ASV1010	Absence	Presence
369	Unclassified_Geodermatophilaceae_1_ASV3582	Unclassified_Geodermatophilaceae_1_ASV3582	Absence	Presence
370	Geodermatophilus_ASV1011	Geodermatophilus_ASV1011	Absence	Presence
371	Crossiella_ASV685	Crossiella_ASV685	Absence	Presence
372	Actinoplanes_ASV88	Actinoplanes_ASV88	Absence	Presence
373	Unclassified_Micromonosporaceae_3_ASV3870	Unclassified_Micromonosporaceae_3_ASV3870	Absence	Presence
374	Unclassified_Micromonosporaceae_1_ASV3868	Unclassified_Micromonosporaceae_1_ASV3868	Absence	Presence
375	Unclassified_Micromonosporaceae_2_ASV3869	Unclassified_Micromonosporaceae_2_ASV3869	Absence	Presence
376	Acidothermus_ASV48	Acidothermus_ASV48	Absence	Presence
377	Amnibacterium_ASV172	Amnibacterium_ASV172	Absence	Presence
378	Unclassified_Microbacteriaceae_6_ASV3851	Unclassified_Microbacteriaceae_6_ASV3851	Absence	Presence
379	Candidatus_Limnoluna_ASV440	Candidatus_Limnoluna_ASV440	Absence	Presence
380	Unclassified_Microbacteriaceae_2_ASV3847	Unclassified_Microbacteriaceae_2_ASV3847	Absence	Presence
381	Unclassified_Actinomycetaceae_1_ASV2513	Unclassified_Actinomycetaceae_1_ASV2513	Absence	Presence
382	Terrabacter_ASV2331	Terrabacter_ASV2331	Absence	Presence
383	Unclassified_Dermabacteraceae_1_ASV3230	Unclassified_Dermabacteraceae_1_ASV3230	Absence	Presence
384	Bifidobacterium_ASV316	Bifidobacterium_ASV316	Absence	Presence
385	Bifidobacterium_ASV315	Bifidobacterium_ASV315	Absence	Presence
386	Rothia_ASV1921	Rothia_ASV1921	Absence	Presence
387	Rothia_ASV1922	Rothia_ASV1922	Absence	Presence
388	Arthrobacter_ASV219	Arthrobacter_ASV219	Absence	Presence
389	Micrococcus_ASV1395	Micrococcus_ASV1395	Absence	Presence
390	Arthrobacter_ASV220	Arthrobacter_ASV220	Absence	Presence
391	Unclassified_Micrococcaceae_5_ASV3859	Unclassified_Micrococcaceae_5_ASV3859	Absence	Presence
392	Unclassified_Micrococcaceae_4_ASV3858	Unclassified_Micrococcaceae_4_ASV3858	Absence	Presence
393	Kocuria_ASV1139	Kocuria_ASV1139	Absence	Presence
394	Brevibacterium_ASV356	Brevibacterium_ASV356	Absence	Presence
395	Unclassified_Glycomycetaceae_1_ASV3591	Unclassified_Glycomycetaceae_1_ASV3591	Absence	Presence
396	Actinomyces_ASV80	Actinomyces_ASV80	Absence	Presence
397	Actinomyces_ASV78	Actinomyces_ASV78	Absence	Presence
398	Actinomyces_ASV76	Actinomyces_ASV76	Absence	Presence
399	Actinomyces_ASV83	Actinomyces_ASV83	Absence	Presence
400	Actinomyces_ASV79	Actinomyces_ASV79	Absence	Presence
401	Actinomadura_ASV75	Actinomadura_ASV75	Absence	Presence
402	Unclassified_Euzebyaceae_1_ASV3373	Unclassified_Euzebyaceae_1_ASV3373	Absence	Presence
403	Unclassified_MB-A2-108_2_ASV3821	Unclassified_MB-A2-108_2_ASV3821	Absence	Presence
404	Unclassified_MB-A2-108_1_ASV3820	Unclassified_MB-A2-108_1_ASV3820	Absence	Presence
405	Unclassified_Eggerthellaceae_2_ASV3315	Unclassified_Eggerthellaceae_2_ASV3315	Absence	Presence
406	Unclassified_Eggerthellaceae_4_ASV3317	Unclassified_Eggerthellaceae_4_ASV3317	Absence	Presence
407	Unclassified_Eggerthellaceae_5_ASV3318	Unclassified_Eggerthellaceae_5_ASV3318	Absence	Presence
408	Unclassified_Eggerthellaceae_3_ASV3316	Unclassified_Eggerthellaceae_3_ASV3316	Absence	Presence
409	DNF00809_ASV844	DNF00809_ASV844	Absence	Presence
410	Unclassified_Eggerthellaceae_1_ASV3314	Unclassified_Eggerthellaceae_1_ASV3314	Absence	Presence
411	Unclassified_Coriobacteriia_1_ASV3138	Unclassified_Coriobacteriia_1_ASV3138	Absence	Presence
412	Unclassidied_67-14_2_ASV2412	Unclassidied_67-14_2_ASV2412	Absence	Presence
413	Unclassidied_67-14_5_ASV2415	Unclassidied_67-14_5_ASV2415	Absence	Presence
414	Solirubrobacter_ASV2106	Solirubrobacter_ASV2106	Absence	Presence
415	Conexibacter_ASV644	Conexibacter_ASV644	Absence	Presence
416	Rubrobacter_ASV1946	Rubrobacter_ASV1946	Absence	Presence
417	Rubrobacter_ASV1945	Rubrobacter_ASV1945	Absence	Presence
418	Rubrobacter_ASV1948	Rubrobacter_ASV1948	Absence	Presence
419	Unclassified_BD2-11_terrestrial_group_4_ASV2865	Unclassified_BD2-11_terrestrial_group_4_ASV2865	Absence	Presence
420	Unclassified_BD2-11_terrestrial_group_23_ASV2854	Unclassified_BD2-11_terrestrial_group_23_ASV2854	Absence	Presence
421	Unclassified_BD2-11_terrestrial_group_7_ASV2868	Unclassified_BD2-11_terrestrial_group_7_ASV2868	Absence	Presence
422	Unclassified_BD2-11_terrestrial_group_26_ASV2857	Unclassified_BD2-11_terrestrial_group_26_ASV2857	Absence	Presence
423	Unclassified_PAUC43f_marine_benthic_group_4_ASV4065	Unclassified_PAUC43f_marine_benthic_group_4_ASV4065	Absence	Presence
424	Unclassified_PAUC43f_marine_benthic_group_9_ASV4070	Unclassified_PAUC43f_marine_benthic_group_9_ASV4070	Absence	Presence
425	Unclassified_Gemmatimonadaceae_8_ASV3580	Unclassified_Gemmatimonadaceae_8_ASV3580	Absence	Presence
426	Unclassified_Gemmatimonadaceae_5_ASV3577	Unclassified_Gemmatimonadaceae_5_ASV3577	Absence	Presence
427	Gemmatimonas_ASV1006	Gemmatimonas_ASV1006	Absence	Presence
428	Unclassified_Gemmatimonadaceae_9_ASV3581	Unclassified_Gemmatimonadaceae_9_ASV3581	Absence	Presence
429	Unclassified_Gemmatimonadaceae_1_ASV3571	Unclassified_Gemmatimonadaceae_1_ASV3571	Absence	Presence
430	Gemmatimonas_ASV1004	Gemmatimonas_ASV1004	Absence	Presence
431	Gemmatimonas_ASV1005	Gemmatimonas_ASV1005	Absence	Presence
432	Unclassified_Gemmatimonadaceae_10_ASV3572	Unclassified_Gemmatimonadaceae_10_ASV3572	Absence	Presence
433	Unclassified_Gemmatimonadaceae_7_ASV3579	Unclassified_Gemmatimonadaceae_7_ASV3579	Absence	Presence
434	Calorithrix_ASV395	Calorithrix_ASV395	Absence	Presence
435	Caldithrix_ASV393	Caldithrix_ASV393	Absence	Presence
436	Caldithrix_ASV390	Caldithrix_ASV390	Absence	Presence
437	Unclassified_Calditrichaceae_3_ASV2971	Unclassified_Calditrichaceae_3_ASV2971	Absence	Presence
438	Unclassified_bacteriap25_5_ASV2705	Unclassified_bacteriap25_5_ASV2705	Absence	Presence
439	Desulfatiglans_ASV758	Desulfatiglans_ASV758	Absence	Presence
440	Unclassified_Desulfocapsaceae_1_ASV3250	Unclassified_Desulfocapsaceae_1_ASV3250	Absence	Presence
441	Desulfopila_ASV792	Desulfopila_ASV792	Absence	Presence
442	Unclassified_Desulfocapsaceae_4_ASV3253	Unclassified_Desulfocapsaceae_4_ASV3253	Absence	Presence
443	Desulfatiglans_ASV750	Desulfatiglans_ASV750	Absence	Presence
444	Desulfatiglans_ASV746	Desulfatiglans_ASV746	Absence	Presence
445	Desulfatiglans_ASV752	Desulfatiglans_ASV752	Absence	Presence
446	Desulfatiglans_ASV739	Desulfatiglans_ASV739	Absence	Presence
447	Desulfatiglans_ASV749	Desulfatiglans_ASV749	Absence	Presence
448	Desulfatiglans_ASV744	Desulfatiglans_ASV744	Absence	Presence
449	Unclassified_Syntrophobacterales_1_ASV4842	Unclassified_Syntrophobacterales_1_ASV4842	Absence	Presence
450	P3OB-42_ASV1566	P3OB-42_ASV1566	Absence	Presence
451	P3OB-42_ASV1573	P3OB-42_ASV1573	Absence	Presence
452	Unclassified_MBNT15_1_ASV3822	Unclassified_MBNT15_1_ASV3822	Absence	Presence
453	Unclassified_Desulfobacterota_1_ASV3237	Unclassified_Desulfobacterota_1_ASV3237	Absence	Presence
454	Unclassified_Desulfobacterota_4_ASV3244	Unclassified_Desulfobacterota_4_ASV3244	Absence	Presence
455	Unclassified_Desulfobacterota_9_ASV3249	Unclassified_Desulfobacterota_9_ASV3249	Absence	Presence
456	Unclassified_MBNT15_4_ASV3825	Unclassified_MBNT15_4_ASV3825	Absence	Presence
457	Unclassified_Myxococcales_2_ASV3917	Unclassified_Myxococcales_2_ASV3917	Absence	Presence
458	Unclassified_Myxococcaceae_4_ASV3915	Unclassified_Myxococcaceae_4_ASV3915	Absence	Presence
459	Unclassified_Myxococcaceae_2_ASV3913	Unclassified_Myxococcaceae_2_ASV3913	Absence	Presence
460	Unclassified_Myxococcaceae_1_ASV3912	Unclassified_Myxococcaceae_1_ASV3912	Absence	Presence
461	Unclassified_Sandaracinaceae_7_ASV4523	Unclassified_Sandaracinaceae_7_ASV4523	Absence	Presence
462	Unclassified_Sandaracinaceae_3_ASV4519	Unclassified_Sandaracinaceae_3_ASV4519	Absence	Presence
463	Unclassified_Sandaracinaceae_9_ASV4525	Unclassified_Sandaracinaceae_9_ASV4525	Absence	Presence
464	Unclassified_Sandaracinaceae_14_ASV4517	Unclassified_Sandaracinaceae_14_ASV4517	Absence	Presence
465	Unclassified_Sandaracinaceae_10_ASV4513	Unclassified_Sandaracinaceae_10_ASV4513	Absence	Presence
466	Sandaracinus_ASV2033	Sandaracinus_ASV2033	Absence	Presence
467	Unclassified_Sandaracinaceae_4_ASV4520	Unclassified_Sandaracinaceae_4_ASV4520	Absence	Presence
468	Unclassified_NB1-j_19_ASV3933	Unclassified_NB1-j_19_ASV3933	Absence	Presence
469	Unclassified_NB1-j_13_ASV3927	Unclassified_NB1-j_13_ASV3927	Absence	Presence
470	Unclassified_NB1-j_4_ASV3939	Unclassified_NB1-j_4_ASV3939	Absence	Presence
471	Unclassified_Polyangiaceae_2_ASV4229	Unclassified_Polyangiaceae_2_ASV4229	Absence	Presence
472	Unclassified_mle1-27_1_ASV3885	Unclassified_mle1-27_1_ASV3885	Absence	Presence
473	Reyranella_ASV1811	Reyranella_ASV1811	Absence	Presence
474	Reyranella_ASV1814	Reyranella_ASV1814	Absence	Presence
475	Reyranella_ASV1813	Reyranella_ASV1813	Absence	Presence
476	Reyranella_ASV1812	Reyranella_ASV1812	Absence	Presence
477	SWB02_ASV2310	SWB02_ASV2310	Absence	Presence
478	SWB02_ASV2302	SWB02_ASV2302	Absence	Presence
479	Unclassified_Hyphomonadaceae_8_ASV3636	Unclassified_Hyphomonadaceae_8_ASV3636	Absence	Presence
480	Unclassified_Hyphomonadaceae_9_ASV3637	Unclassified_Hyphomonadaceae_9_ASV3637	Absence	Presence
481	Unclassified_Hyphomonadaceae_10_ASV3628	Unclassified_Hyphomonadaceae_10_ASV3628	Absence	Presence
482	Candidatus_Megaira_ASV443	Candidatus_Megaira_ASV443	Absence	Presence
483	Unclassified_Parvularculaceae_1_ASV4043	Unclassified_Parvularculaceae_1_ASV4043	Absence	Presence
484	Amphiplicatus_ASV174	Amphiplicatus_ASV174	Absence	Presence
485	Unclassified_Defluviicoccales_4_ASV3223	Unclassified_Defluviicoccales_4_ASV3223	Absence	Presence
486	Unclassified_Sphingomonadaceae_3_ASV4754	Unclassified_Sphingomonadaceae_3_ASV4754	Absence	Presence
487	Unclassified_EF100-94H03_ASV856	Unclassified_EF100-94H03_ASV856	Absence	Presence
488	Unclassified_Alphaproteobacteria_4_ASV2572	Unclassified_Alphaproteobacteria_4_ASV2572	Absence	Presence
489	Unclassified_Alphaproteobacteria_21_ASV2554	Unclassified_Alphaproteobacteria_21_ASV2554	Absence	Presence
490	Unclassified_Alphaproteobacteria_15_ASV2547	Unclassified_Alphaproteobacteria_15_ASV2547	Absence	Presence
491	Unclassified_Rhodobacteraceae_102_ASV4349	Unclassified_Rhodobacteraceae_102_ASV4349	Absence	Presence
492	Limibaculum_ASV1266	Limibaculum_ASV1266	Absence	Presence
493	Unclassified_Rhodobacteraceae_72_ASV4417	Unclassified_Rhodobacteraceae_72_ASV4417	Absence	Presence
494	Rubribacterium_ASV1937	Rubribacterium_ASV1937	Absence	Presence
495	Rubribacterium_ASV1939	Rubribacterium_ASV1939	Absence	Presence
496	Unclassified_Alphaproteobacteria_23_ASV2556	Unclassified_Alphaproteobacteria_23_ASV2556	Absence	Presence
497	Unclassified_Alphaproteobacteria_24_ASV2557	Unclassified_Alphaproteobacteria_24_ASV2557	Absence	Presence
498	Unclassified_Geminicoccaceae_4_ASV3552	Unclassified_Geminicoccaceae_4_ASV3552	Absence	Presence
499	Unclassified_Rhodospirillales_1_ASV4455	Unclassified_Rhodospirillales_1_ASV4455	Absence	Presence
500	Unclassified_Alphaproteobacteria_8_ASV2576	Unclassified_Alphaproteobacteria_8_ASV2576	Absence	Presence
501	Peredibacter_ASV1629	Peredibacter_ASV1629	Absence	Presence
502	Unclassified_SM2D12_1_ASV4735	Unclassified_SM2D12_1_ASV4735	Absence	Presence
503	Bartonella_ASV277	Bartonella_ASV277	Absence	Presence
504	Unclassified_Hyphomonadaceae_4_ASV3632	Unclassified_Hyphomonadaceae_4_ASV3632	Absence	Presence
505	Ochrobactrum_ASV1539	Ochrobactrum_ASV1539	Absence	Presence
506	Unclassified_Rhizobiaceae_20_ASV4305	Unclassified_Rhizobiaceae_20_ASV4305	Absence	Presence
507	Unclassified_Rhizobiaceae_13_ASV4297	Unclassified_Rhizobiaceae_13_ASV4297	Absence	Presence
508	Allorhizobium-Neorhizobium-Pararhizobium-Rhizobium_ASV141	Allorhizobium-Neorhizobium-Pararhizobium-Rhizobium_ASV141	Absence	Presence
509	Allorhizobium-Neorhizobium-Pararhizobium-Rhizobium_ASV144	Allorhizobium-Neorhizobium-Pararhizobium-Rhizobium_ASV144	Absence	Presence
510	Bartonella_ASV283	Bartonella_ASV283	Absence	Presence
511	Unclassified_Rhizobiaceae_21_ASV4306	Unclassified_Rhizobiaceae_21_ASV4306	Absence	Presence
512	Unclassified_Rhizobiaceae_27_ASV4312	Unclassified_Rhizobiaceae_27_ASV4312	Absence	Presence
513	Unclassified_Rhizobiales_8_ASV4330	Unclassified_Rhizobiales_8_ASV4330	Absence	Presence
514	Hyphomonas_ASV1119	Hyphomonas_ASV1119	Absence	Presence
515	Unclassified_Rhodobacteraceae_4_ASV4381	Unclassified_Rhodobacteraceae_4_ASV4381	Absence	Presence
516	Phenylobacterium_ASV1655	Phenylobacterium_ASV1655	Absence	Presence
517	Unclassified_Caulobacteraceae_1_ASV2997	Unclassified_Caulobacteraceae_1_ASV2997	Absence	Presence
518	Unclassified_Caulobacteraceae_2_ASV2998	Unclassified_Caulobacteraceae_2_ASV2998	Absence	Presence
519	Methylobacterium-Methylorubrum_ASV1369	Methylobacterium-Methylorubrum_ASV1369	Absence	Presence
520	Methylobacterium-Methylorubrum_ASV1359	Methylobacterium-Methylorubrum_ASV1359	Absence	Presence
521	Unclassified_Beijerinckiaceae_9_ASV2902	Unclassified_Beijerinckiaceae_9_ASV2902	Absence	Presence
522	Unclassified_Beijerinckiaceae_23_ASV2892	Unclassified_Beijerinckiaceae_23_ASV2892	Absence	Presence
523	Unclassified_Beijerinckiaceae_20_ASV2889	Unclassified_Beijerinckiaceae_20_ASV2889	Absence	Presence
524	Microvirga_ASV1399	Microvirga_ASV1399	Absence	Presence
525	Microvirga_ASV1398	Microvirga_ASV1398	Absence	Presence
526	Microvirga_ASV1397	Microvirga_ASV1397	Absence	Presence
527	Rhodopseudomonas_ASV1866	Rhodopseudomonas_ASV1866	Absence	Presence
528	Bradyrhizobium_ASV354	Bradyrhizobium_ASV354	Absence	Presence
529	Pseudolabrys_ASV1751	Pseudolabrys_ASV1751	Absence	Presence
530	Unclassified_Xanthobacteraceae_6_ASV4958	Unclassified_Xanthobacteraceae_6_ASV4958	Absence	Presence
531	Unclassified_D05-2_1_ASV3215	Unclassified_D05-2_1_ASV3215	Absence	Presence
532	1174-901-12_ASV20	1174-901-12_ASV20	Absence	Presence
533	Rhodomicrobium_ASV1851	Rhodomicrobium_ASV1851	Absence	Presence
534	Devosia_ASV834	Devosia_ASV834	Absence	Presence
535	Devosia_ASV829	Devosia_ASV829	Absence	Presence
536	Unclassified_Rhizobiales_Incertae_Sedis_4_ASV4335	Unclassified_Rhizobiales_Incertae_Sedis_4_ASV4335	Absence	Presence
537	Unclassified_Rhizobiaceae_24_ASV4309	Unclassified_Rhizobiaceae_24_ASV4309	Absence	Presence
538	Unclassified_Rhizobiales_Incertae_Sedis_5_ASV4336	Unclassified_Rhizobiales_Incertae_Sedis_5_ASV4336	Absence	Presence
539	Hyphomicrobium_ASV1118	Hyphomicrobium_ASV1118	Absence	Presence
540	Hyphomicrobium_ASV1110	Hyphomicrobium_ASV1110	Absence	Presence
541	HIMB11_ASV1091	HIMB11_ASV1091	Absence	Presence
542	Unclassified_Rhodobacteraceae_86_ASV4432	Unclassified_Rhodobacteraceae_86_ASV4432	Absence	Presence
543	Roseovarius_ASV1920	Roseovarius_ASV1920	Absence	Presence
544	Roseovarius_ASV1917	Roseovarius_ASV1917	Absence	Presence
545	Rubellimicrobium_ASV1927	Rubellimicrobium_ASV1927	Absence	Presence
546	Rubellimicrobium_ASV1928	Rubellimicrobium_ASV1928	Absence	Presence
547	Paracoccus_ASV1592	Paracoccus_ASV1592	Absence	Presence
548	Unclassified_Rhodobacteraceae_34_ASV4375	Unclassified_Rhodobacteraceae_34_ASV4375	Absence	Presence
549	Unclassified_Rhodobacteraceae_28_ASV4368	Unclassified_Rhodobacteraceae_28_ASV4368	Absence	Presence
550	Unclassified_Rhodobacteraceae_48_ASV4390	Unclassified_Rhodobacteraceae_48_ASV4390	Absence	Presence
551	Unclassified_Rhodobacteraceae_67_ASV4411	Unclassified_Rhodobacteraceae_67_ASV4411	Absence	Presence
552	Aminobacter_ASV171	Aminobacter_ASV171	Absence	Presence
553	Unclassified_Rhizobiaceae_7_ASV4319	Unclassified_Rhizobiaceae_7_ASV4319	Absence	Presence
554	Unclassified_Stappiaceae_2_ASV4798	Unclassified_Stappiaceae_2_ASV4798	Absence	Presence
555	Unclassified_Sphingomonadaceae_6_ASV4757	Unclassified_Sphingomonadaceae_6_ASV4757	Absence	Presence
556	Dichotomicrobium_ASV839	Dichotomicrobium_ASV839	Absence	Presence
557	Unclassified_Alphaproteobacteria_31_ASV2565	Unclassified_Alphaproteobacteria_31_ASV2565	Absence	Presence
558	Unclassified_Rhodospirillaceae_2_ASV4454	Unclassified_Rhodospirillaceae_2_ASV4454	Absence	Presence
559	Unclassified_Reyranellaceae_1_ASV4269	Unclassified_Reyranellaceae_1_ASV4269	Absence	Presence
560	Unclassified_Alphaproteobacteria_27_ASV2560	Unclassified_Alphaproteobacteria_27_ASV2560	Absence	Presence
561	Unclassified_Alphaproteobacteria_30_ASV2564	Unclassified_Alphaproteobacteria_30_ASV2564	Absence	Presence
562	Unclassified_Alphaproteobacteria_37_ASV2571	Unclassified_Alphaproteobacteria_37_ASV2571	Absence	Presence
563	Unclassified_Alphaproteobacteria_7_ASV2575	Unclassified_Alphaproteobacteria_7_ASV2575	Absence	Presence
564	Unclassified_Thalassobaculales_1_ASV4849	Unclassified_Thalassobaculales_1_ASV4849	Absence	Presence
565	Unclassified_Alphaproteobacteria_28_ASV2561	Unclassified_Alphaproteobacteria_28_ASV2561	Absence	Presence
566	Dongia_ASV849	Dongia_ASV849	Absence	Presence
567	Roseomonas_ASV1914	Roseomonas_ASV1914	Absence	Presence
568	Unclassified_Acetobacteraceae_5_ASV2470	Unclassified_Acetobacteraceae_5_ASV2470	Absence	Presence
569	Roseomonas_ASV1913	Roseomonas_ASV1913	Absence	Presence
570	Unclassified_Acetobacteraceae_3_ASV2468	Unclassified_Acetobacteraceae_3_ASV2468	Absence	Presence
571	Unclassified_Acetobacteraceae_4_ASV2469	Unclassified_Acetobacteraceae_4_ASV2469	Absence	Presence
572	Asaia_ASV226	Asaia_ASV226	Absence	Presence
573	Gluconobacter_ASV1024	Gluconobacter_ASV1024	Absence	Presence
574	Commensalibacter_ASV641	Commensalibacter_ASV641	Absence	Presence
575	Asaia_ASV222	Asaia_ASV222	Absence	Presence
576	Unclassified_Acetobacteraceae_8_ASV2473	Unclassified_Acetobacteraceae_8_ASV2473	Absence	Presence
577	Roseomonas_ASV1909	Roseomonas_ASV1909	Absence	Presence
578	Unclassified_Acetobacteraceae_7_ASV2472	Unclassified_Acetobacteraceae_7_ASV2472	Absence	Presence
579	Unclassified_Acetobacteraceae_6_ASV2471	Unclassified_Acetobacteraceae_6_ASV2471	Absence	Presence
580	Skermanella_ASV2092	Skermanella_ASV2092	Absence	Presence
581	Skermanella_ASV2091	Skermanella_ASV2091	Absence	Presence
582	Skermanella_ASV2090	Skermanella_ASV2090	Absence	Presence
583	Unclassified_Azospirillales_1_ASV2665	Unclassified_Azospirillales_1_ASV2665	Absence	Presence
584	Unclassified_Azospirillaceae_3_ASV2663	Unclassified_Azospirillaceae_3_ASV2663	Absence	Presence
585	Unclassified_Alphaproteobacteria_22_ASV2555	Unclassified_Alphaproteobacteria_22_ASV2555	Absence	Presence
586	Defluviicoccus_ASV718	Defluviicoccus_ASV718	Absence	Presence
587	Defluviicoccus_ASV725	Defluviicoccus_ASV725	Absence	Presence
588	Defluviicoccus_ASV722	Defluviicoccus_ASV722	Absence	Presence
589	Unclassified_Azospirillales_2_ASV2666	Unclassified_Azospirillales_2_ASV2666	Absence	Presence
590	Defluviicoccus_ASV719	Defluviicoccus_ASV719	Absence	Presence
591	Rhodovibrio_ASV1874	Rhodovibrio_ASV1874	Absence	Presence
592	Unclassified_Cardiobacteriaceae_1_ASV2994	Unclassified_Cardiobacteriaceae_1_ASV2994	Absence	Presence
593	Unclassified_Carnobacteriaceae_2_ASV2996	Unclassified_Carnobacteriaceae_2_ASV2996	Absence	Presence
594	Unclassified_Sphingomonadaceae_4_ASV4755	Unclassified_Sphingomonadaceae_4_ASV4755	Absence	Presence
595	Unclassified_Magnetospirillaceae_1_ASV3791	Unclassified_Magnetospirillaceae_1_ASV3791	Absence	Presence
596	Sphingomonas_ASV2134	Sphingomonas_ASV2134	Absence	Presence
597	Sphingomonas_ASV2129	Sphingomonas_ASV2129	Absence	Presence
598	Sphingomonas_ASV2122	Sphingomonas_ASV2122	Absence	Presence
599	Sphingomonas_ASV2121	Sphingomonas_ASV2121	Absence	Presence
600	Sphingomonas_ASV2132	Sphingomonas_ASV2132	Absence	Presence
601	Unclassified_Sphingomonadaceae_8_ASV4759	Unclassified_Sphingomonadaceae_8_ASV4759	Absence	Presence
602	Sphingoaurantiacus_ASV2112	Sphingoaurantiacus_ASV2112	Absence	Presence
603	Sphingopyxis_ASV2146	Sphingopyxis_ASV2146	Absence	Presence
604	Sphingopyxis_ASV2143	Sphingopyxis_ASV2143	Absence	Presence
605	Sphingopyxis_ASV2144	Sphingopyxis_ASV2144	Absence	Presence
606	Unclassified_Sphingomonadaceae_7_ASV4758	Unclassified_Sphingomonadaceae_7_ASV4758	Absence	Presence
607	Sphingopyxis_ASV2142	Sphingopyxis_ASV2142	Absence	Presence
608	Novosphingobium_ASV1509	Novosphingobium_ASV1509	Absence	Presence
609	Unclassified_Sphingomonadaceae_13_ASV4751	Unclassified_Sphingomonadaceae_13_ASV4751	Absence	Presence
610	Novosphingobium_ASV1513	Novosphingobium_ASV1513	Absence	Presence
611	Novosphingobium_ASV1514	Novosphingobium_ASV1514	Absence	Presence
612	Unclassified_Sphingomonadaceae_5_ASV4756	Unclassified_Sphingomonadaceae_5_ASV4756	Absence	Presence
613	Altererythrobacter_ASV167	Altererythrobacter_ASV167	Absence	Presence
614	Altererythrobacter_ASV166	Altererythrobacter_ASV166	Absence	Presence
615	Unclassified_Rhodospirillales_2_ASV4456	Unclassified_Rhodospirillales_2_ASV4456	Absence	Presence
616	Haliangium_ASV1053	Haliangium_ASV1053	Absence	Presence
617	P3OB-42_ASV1565	P3OB-42_ASV1565	Absence	Presence
618	Nannocystis_ASV1463	Nannocystis_ASV1463	Absence	Presence
619	SEEP-SRB1_ASV2067	SEEP-SRB1_ASV2067	Absence	Presence
620	Unclassified_Desulfobacterota_7_ASV3247	Unclassified_Desulfobacterota_7_ASV3247	Absence	Presence
621	Bdellovibrio_ASV299	Bdellovibrio_ASV299	Absence	Presence
622	Bdellovibrio_ASV301	Bdellovibrio_ASV301	Absence	Presence
623	Bdellovibrio_ASV295	Bdellovibrio_ASV295	Absence	Presence
624	Unclassified_SAR324_clade(Marine_group_B)_15_ASV4595	Unclassified_SAR324_clade(Marine_group_B)_15_ASV4595	Absence	Presence
625	Unclassified_Desulfobacterota_13_ASV3241	Unclassified_Desulfobacterota_13_ASV3241	Absence	Presence
626	Unclassified_Bradymonadaceae_7_ASV2936	Unclassified_Bradymonadaceae_7_ASV2936	Absence	Presence
627	Unclassified_Bradymonadales_2_ASV2947	Unclassified_Bradymonadales_2_ASV2947	Absence	Presence
628	Unclassified_Bradymonadales_11_ASV2942	Unclassified_Bradymonadales_11_ASV2942	Absence	Presence
629	Desulfovermiculus_ASV800	Desulfovermiculus_ASV800	Absence	Presence
630	Unclassified_Silvanigrellaceae_2_ASV4724	Unclassified_Silvanigrellaceae_2_ASV4724	Absence	Presence
631	Unclassified_Oligoflexaceae_3_ASV3995	Unclassified_Oligoflexaceae_3_ASV3995	Absence	Presence
632	Oligoflexus_ASV1547	Oligoflexus_ASV1547	Absence	Presence
633	Unclassified_Oligoflexaceae_2_ASV3994	Unclassified_Oligoflexaceae_2_ASV3994	Absence	Presence
634	Unclassified_Hydrogenedensaceae_2_ASV3618	Unclassified_Hydrogenedensaceae_2_ASV3618	Absence	Presence
635	Unclassified_Hydrogenedensaceae_3_ASV3619	Unclassified_Hydrogenedensaceae_3_ASV3619	Absence	Presence
636	Unclassified_Chthonomonadales_ASV557	Unclassified_Chthonomonadales_ASV557	Absence	Presence
637	Abditibacterium_ASV30	Abditibacterium_ASV30	Absence	Presence
638	Abditibacterium_ASV28	Abditibacterium_ASV28	Absence	Presence
639	Unclassified_Fimbriimonadaceae_2_ASV3385	Unclassified_Fimbriimonadaceae_2_ASV3385	Absence	Presence
640	Unclassified_vadinHA49_4_ASV4881	Unclassified_vadinHA49_4_ASV4881	Absence	Presence
641	MND1_ASV1402	MND1_ASV1402	Absence	Presence
642	Massilia_ASV1331	Massilia_ASV1331	Absence	Presence
643	Massilia_ASV1334	Massilia_ASV1334	Absence	Presence
644	Massilia_ASV1335	Massilia_ASV1335	Absence	Presence
645	Ellin6067_ASV860	Ellin6067_ASV860	Absence	Presence
646	Unclassified_Burkholderiales_3_ASV2960	Unclassified_Burkholderiales_3_ASV2960	Absence	Presence
647	Burkholderia-Caballeronia-Paraburkholderia_ASV382	Burkholderia-Caballeronia-Paraburkholderia_ASV382	Absence	Presence
648	Unclassified_MWH-UniP1_aquatic_group_2_ASV3911	Unclassified_MWH-UniP1_aquatic_group_2_ASV3911	Absence	Presence
649	Unclassified_Rhodocyclaceae_4_ASV4450	Unclassified_Rhodocyclaceae_4_ASV4450	Absence	Presence
650	Unclassified_Burkholderiales_1_ASV2958	Unclassified_Burkholderiales_1_ASV2958	Absence	Presence
651	Unclassified_Comamonadaceae_22_ASV3119	Unclassified_Comamonadaceae_22_ASV3119	Absence	Presence
652	Unclassified_Comamonadaceae_28_ASV3125	Unclassified_Comamonadaceae_28_ASV3125	Absence	Presence
653	Unclassified_Comamonadaceae_29_ASV3126	Unclassified_Comamonadaceae_29_ASV3126	Absence	Presence
654	Unclassified_Comamonadaceae_6_ASV3133	Unclassified_Comamonadaceae_6_ASV3133	Absence	Presence
655	Unclassified_Comamonadaceae_2_ASV3116	Unclassified_Comamonadaceae_2_ASV3116	Absence	Presence
656	Brachymonas_ASV352	Brachymonas_ASV352	Absence	Presence
657	Unclassified_Comamonadaceae_13_ASV3109	Unclassified_Comamonadaceae_13_ASV3109	Absence	Presence
658	Unclassified_Comamonadaceae_7_ASV3134	Unclassified_Comamonadaceae_7_ASV3134	Absence	Presence
659	Unclassified_Comamonadaceae_27_ASV3124	Unclassified_Comamonadaceae_27_ASV3124	Absence	Presence
660	Hydrogenophaga_ASV1097	Hydrogenophaga_ASV1097	Absence	Presence
661	Simplicispira_ASV2089	Simplicispira_ASV2089	Absence	Presence
662	Rhodoferax_ASV1840	Rhodoferax_ASV1840	Absence	Presence
663	Unclassified_Comamonadaceae_18_ASV3114	Unclassified_Comamonadaceae_18_ASV3114	Absence	Presence
664	Methylotenera_ASV1391	Methylotenera_ASV1391	Absence	Presence
665	Methylotenera_ASV1392	Methylotenera_ASV1392	Absence	Presence
666	Neisseria_ASV1470	Neisseria_ASV1470	Absence	Presence
667	Snodgrassella_ASV2104	Snodgrassella_ASV2104	Absence	Presence
668	Unclassified_Neisseriaceae_12_ASV3948	Unclassified_Neisseriaceae_12_ASV3948	Absence	Presence
669	Lautropia_ASV1188	Lautropia_ASV1188	Absence	Presence
670	Polynucleobacter_ASV1707	Polynucleobacter_ASV1707	Absence	Presence
671	Unclassified_Hydrogenophilaceae_1_ASV3621	Unclassified_Hydrogenophilaceae_1_ASV3621	Absence	Presence
672	Unclassified_TRA3-20_ASV2373	Unclassified_TRA3-20_ASV2373	Absence	Presence
673	966-1_ASV21	966-1_ASV21	Absence	Presence
674	Salinisphaera_ASV1992	Salinisphaera_ASV1992	Absence	Presence
675	Unclassified_Desulfosarcinaceae_3_ASV3271	Unclassified_Desulfosarcinaceae_3_ASV3271	Absence	Presence
676	Unclassified_Desulfosarcinaceae_7_ASV3275	Unclassified_Desulfosarcinaceae_7_ASV3275	Absence	Presence
677	Desulfobacter_ASV770	Desulfobacter_ASV770	Absence	Presence
678	Unclassified_Desulfosarcinaceae_11_ASV3268	Unclassified_Desulfosarcinaceae_11_ASV3268	Absence	Presence
679	Unclassified_Desulfosarcinaceae_2_ASV3270	Unclassified_Desulfosarcinaceae_2_ASV3270	Absence	Presence
680	Unclassified_Desulfosarcinaceae_12_ASV3269	Unclassified_Desulfosarcinaceae_12_ASV3269	Absence	Presence
681	Sva0081_sediment_group_ASV2296	Sva0081_sediment_group_ASV2296	Absence	Presence
682	Sva0081_sediment_group_ASV2290	Sva0081_sediment_group_ASV2290	Absence	Presence
683	Unclassified_Desulfovibrionaceae_13_ASV3282	Unclassified_Desulfovibrionaceae_13_ASV3282	Absence	Presence
684	Unclassified_Desulfococcaceae_2_ASV3258	Unclassified_Desulfococcaceae_2_ASV3258	Absence	Presence
685	SEEP-SRB1_ASV2069	SEEP-SRB1_ASV2069	Absence	Presence
686	Sva0081_sediment_group_ASV2298	Sva0081_sediment_group_ASV2298	Absence	Presence
687	SEEP-SRB1_ASV2068	SEEP-SRB1_ASV2068	Absence	Presence
688	Incertae_Sedis_ASV1127	Incertae_Sedis_ASV1127	Absence	Presence
689	Unknown_Family_Gammaproteobacteria_Incertae_Sedis_9_ASV5019	Unknown_Family_Gammaproteobacteria_Incertae_Sedis_9_ASV5019	Absence	Presence
690	Unclassified_Xanthomonadaceae_4_ASV4965	Unclassified_Xanthomonadaceae_4_ASV4965	Absence	Presence
691	Lysobacter_ASV1297	Lysobacter_ASV1297	Absence	Presence
692	Stenotrophomonas_ASV2229	Stenotrophomonas_ASV2229	Absence	Presence
693	Stenotrophomonas_ASV2227	Stenotrophomonas_ASV2227	Absence	Presence
694	Xanthomonas_ASV5108	Xanthomonas_ASV5108	Absence	Presence
695	Pseudoxanthomonas_ASV1781	Pseudoxanthomonas_ASV1781	Absence	Presence
696	Lysobacter_ASV1298	Lysobacter_ASV1298	Absence	Presence
697	Luteibacter_ASV1276	Luteibacter_ASV1276	Absence	Presence
698	Tahibacter_ASV2318	Tahibacter_ASV2318	Absence	Presence
699	Unclassified_Gammaproteobacteria_34_ASV3489	Unclassified_Gammaproteobacteria_34_ASV3489	Absence	Presence
700	Unclassified_Gammaproteobacteria_44_ASV3500	Unclassified_Gammaproteobacteria_44_ASV3500	Absence	Presence
701	Unclassified_Gammaproteobacteria_1_ASV3462	Unclassified_Gammaproteobacteria_1_ASV3462	Absence	Presence
702	Methylocaldum_ASV1373	Methylocaldum_ASV1373	Absence	Presence
703	Unclassified_Halieaceae_4_ASV3601	Unclassified_Halieaceae_4_ASV3601	Absence	Presence
704	Unclassified_Gammaproteobacteria_57_ASV3514	Unclassified_Gammaproteobacteria_57_ASV3514	Absence	Presence
705	Unclassified_Gammaproteobacteria_58_ASV3515	Unclassified_Gammaproteobacteria_58_ASV3515	Absence	Presence
706	Unclassified_HOC36_3_ASV3612	Unclassified_HOC36_3_ASV3612	Absence	Presence
707	Unclassified_Nitrococcaceae_5_ASV3963	Unclassified_Nitrococcaceae_5_ASV3963	Absence	Presence
708	Unclassified_Chromatiaceae_10_ASV3053	Unclassified_Chromatiaceae_10_ASV3053	Absence	Presence
709	Unclassified_Arenicellaceae_4_ASV2656	Unclassified_Arenicellaceae_4_ASV2656	Absence	Presence
710	Halochromatium_ASV1058	Halochromatium_ASV1058	Absence	Presence
711	Halochromatium_ASV1057	Halochromatium_ASV1057	Absence	Presence
712	Thiohalocapsa_ASV2356	Thiohalocapsa_ASV2356	Absence	Presence
713	Unclassified_AT-s2-59_ASV233	Unclassified_AT-s2-59_ASV233	Absence	Presence
714	Unclassified_KI89A_clade_2_ASV3672	Unclassified_KI89A_clade_2_ASV3672	Absence	Presence
715	Pseudomonas_ASV1767	Pseudomonas_ASV1767	Absence	Presence
716	Pseudomonas_ASV1760	Pseudomonas_ASV1760	Absence	Presence
717	Pseudomonas_ASV1771	Pseudomonas_ASV1771	Absence	Presence
718	Pseudomonas_ASV1766	Pseudomonas_ASV1766	Absence	Presence
719	Pseudomonas_ASV1756	Pseudomonas_ASV1756	Absence	Presence
720	Pseudomonas_ASV1759	Pseudomonas_ASV1759	Absence	Presence
721	Pseudomonas_ASV1762	Pseudomonas_ASV1762	Absence	Presence
722	Pseudomonas_ASV1755	Pseudomonas_ASV1755	Absence	Presence
723	Unclassified_Pseudomonadales_8_ASV4257	Unclassified_Pseudomonadales_8_ASV4257	Absence	Presence
724	Unclassified_Steroidobacteraceae_2_ASV4800	Unclassified_Steroidobacteraceae_2_ASV4800	Absence	Presence
725	Unclassified_Gammaproteobacteria_31_ASV3486	Unclassified_Gammaproteobacteria_31_ASV3486	Absence	Presence
726	Unclassified_Steroidobacteraceae_1_ASV4799	Unclassified_Steroidobacteraceae_1_ASV4799	Absence	Presence
727	Acidibacter_ASV46	Acidibacter_ASV46	Absence	Presence
728	Unclassified_Spongiibacteraceae_3_ASV4783	Unclassified_Spongiibacteraceae_3_ASV4783	Absence	Presence
729	Unclassified_Pasteurellaceae_7_ASV4052	Unclassified_Pasteurellaceae_7_ASV4052	Absence	Presence
730	Phocoenobacter_ASV1656	Phocoenobacter_ASV1656	Absence	Presence
731	Unclassified_Gammaproteobacteria_35_ASV3490	Unclassified_Gammaproteobacteria_35_ASV3490	Absence	Presence
732	Actinobacillus_ASV72	Actinobacillus_ASV72	Absence	Presence
733	Haemophilus_ASV1041	Haemophilus_ASV1041	Absence	Presence
734	Haemophilus_ASV1043	Haemophilus_ASV1043	Absence	Presence
735	Unclassified_Pasteurellaceae_5_ASV4050	Unclassified_Pasteurellaceae_5_ASV4050	Absence	Presence
736	Arsenophonus_ASV218	Arsenophonus_ASV218	Absence	Presence
737	Arsenophonus_ASV217	Arsenophonus_ASV217	Absence	Presence
738	Providencia_ASV1736	Providencia_ASV1736	Absence	Presence
739	Pseudoalteromonas_ASV1741	Pseudoalteromonas_ASV1741	Absence	Presence
740	Vibrio_ASV5054	Vibrio_ASV5054	Absence	Presence
741	Vibrio_ASV5062	Vibrio_ASV5062	Absence	Presence
742	Vibrio_ASV5058	Vibrio_ASV5058	Absence	Presence
743	Vibrio_ASV5053	Vibrio_ASV5053	Absence	Presence
744	Unclassified_Yersiniaceae_3_ASV4971	Unclassified_Yersiniaceae_3_ASV4971	Absence	Presence
745	Hafnia-Obesumbacterium_ASV1044	Hafnia-Obesumbacterium_ASV1044	Absence	Presence
746	Unclassified_Erwiniaceae_2_ASV3357	Unclassified_Erwiniaceae_2_ASV3357	Absence	Presence
747	Unclassified_Erwiniaceae_6_ASV3361	Unclassified_Erwiniaceae_6_ASV3361	Absence	Presence
748	Unclassified_Enterobacteriaceae_13_ASV3330	Unclassified_Enterobacteriaceae_13_ASV3330	Absence	Presence
749	Unclassified_Enterobacteriaceae_18_ASV3335	Unclassified_Enterobacteriaceae_18_ASV3335	Absence	Presence
750	Enterobacter_ASV864	Enterobacter_ASV864	Absence	Presence
751	Unclassified_Enterobacteriaceae_7_ASV3344	Unclassified_Enterobacteriaceae_7_ASV3344	Absence	Presence
752	Ketobacter_ASV1137	Ketobacter_ASV1137	Absence	Presence
753	Psychrobacter_ASV1786	Psychrobacter_ASV1786	Absence	Presence
754	Alkanindiges_ASV135	Alkanindiges_ASV135	Absence	Presence
755	Acinetobacter_ASV57	Acinetobacter_ASV57	Absence	Presence
756	Acinetobacter_ASV62	Acinetobacter_ASV62	Absence	Presence
757	Acinetobacter_ASV60	Acinetobacter_ASV60	Absence	Presence
758	Acinetobacter_ASV68	Acinetobacter_ASV68	Absence	Presence
759	Acinetobacter_ASV63	Acinetobacter_ASV63	Absence	Presence
760	Unclassified_Moraxellaceae_1_ASV3900	Unclassified_Moraxellaceae_1_ASV3900	Absence	Presence
761	Rheinheimera_ASV1816	Rheinheimera_ASV1816	Absence	Presence
762	Pseudohongiella_ASV1749	Pseudohongiella_ASV1749	Absence	Presence
763	Unclassified_Halomonadaceae_4_ASV3608	Unclassified_Halomonadaceae_4_ASV3608	Absence	Presence
764	Cobetia_ASV631	Cobetia_ASV631	Absence	Presence
765	Halomonas_ASV1066	Halomonas_ASV1066	Absence	Presence
766	Unclassified_Dadabacteriales_2_ASV3219	Unclassified_Dadabacteriales_2_ASV3219	Absence	Presence
767	Unclassified_Gammaproteobacteria_20_ASV3474	Unclassified_Gammaproteobacteria_20_ASV3474	Absence	Presence
768	Unclassified_EPR3968-O8a-Bc78_4_ASV3350	Unclassified_EPR3968-O8a-Bc78_4_ASV3350	Absence	Presence
769	Unclassified_EPR3968-O8a-Bc78_2_ASV3348	Unclassified_EPR3968-O8a-Bc78_2_ASV3348	Absence	Presence
770	Unclassified_Nitrosococcaceae_4_ASV3968	Unclassified_Nitrosococcaceae_4_ASV3968	Absence	Presence
771	Unclassified_Gammaproteobacteria_5_ASV3506	Unclassified_Gammaproteobacteria_5_ASV3506	Absence	Presence
772	Unclassified_Ga0077536_ASV981	Unclassified_Ga0077536_ASV981	Absence	Presence
773	Unclassified_Nitrosococcaceae_2_ASV3966	Unclassified_Nitrosococcaceae_2_ASV3966	Absence	Presence
774	Unclassified_CCM19a_ASV499	Unclassified_CCM19a_ASV499	Absence	Presence
775	Halofilum_ASV1063	Halofilum_ASV1063	Absence	Presence
776	Unclassified_Gammaproteobacteria_64_ASV3522	Unclassified_Gammaproteobacteria_64_ASV3522	Absence	Presence
777	Unclassified_Gammaproteobacteria_50_ASV3507	Unclassified_Gammaproteobacteria_50_ASV3507	Absence	Presence
778	Unclassified_Gammaproteobacteria_12_ASV3465	Unclassified_Gammaproteobacteria_12_ASV3465	Absence	Presence
779	Unclassified_Gammaproteobacteria_27_ASV3481	Unclassified_Gammaproteobacteria_27_ASV3481	Absence	Presence
780	Unclassified_Woeseiaceae_3_ASV4945	Unclassified_Woeseiaceae_3_ASV4945	Absence	Presence
781	Unclassified_Diplorickettsiaceae_2_ASV3305	Unclassified_Diplorickettsiaceae_2_ASV3305	Absence	Presence
782	Unclassified_Diplorickettsiaceae_3_ASV3306	Unclassified_Diplorickettsiaceae_3_ASV3306	Absence	Presence
783	Pseudohongiella_ASV1750	Pseudohongiella_ASV1750	Absence	Presence
784	Unclassified_Methylomonadaceae_1_ASV3836	Unclassified_Methylomonadaceae_1_ASV3836	Absence	Presence
785	Unknown_Family_Gammaproteobacteria_Incertae_Sedis_11_ASV5005	Unknown_Family_Gammaproteobacteria_Incertae_Sedis_11_ASV5005	Absence	Presence
786	Legionella_ASV1225	Legionella_ASV1225	Absence	Presence
787	Legionella_ASV1213	Legionella_ASV1213	Absence	Presence
788	Legionella_ASV1209	Legionella_ASV1209	Absence	Presence
789	Legionella_ASV1210	Legionella_ASV1210	Absence	Presence
790	Salinibacter_ASV1972	Salinibacter_ASV1972	Absence	Presence
791	Thiomicrorhabdus_ASV2361	Thiomicrorhabdus_ASV2361	Absence	Presence
792	Unclassified_Arcobacteraceae_1_ASV2628	Unclassified_Arcobacteraceae_1_ASV2628	Absence	Presence
793	Helicobacter_ASV1084	Helicobacter_ASV1084	Absence	Presence
794	Helicobacter_ASV1088	Helicobacter_ASV1088	Absence	Presence
795	Unclassified_Campylobacterales_3_ASV2987	Unclassified_Campylobacterales_3_ASV2987	Absence	Presence
796	Unclassified_Babeliales_1_ASV2667	Unclassified_Babeliales_1_ASV2667	Absence	Presence
797	Unclassified_Saccharimonadales_2_ASV4511	Unclassified_Saccharimonadales_2_ASV4511	Absence	Presence
798	Candidatus_Saccharimonas_ASV466	Candidatus_Saccharimonas_ASV466	Absence	Presence
799	Candidatus_Saccharimonas_ASV467	Candidatus_Saccharimonas_ASV467	Absence	Presence
800	Unclassified_Gracilibacteria_1_ASV3592	Unclassified_Gracilibacteria_1_ASV3592	Absence	Presence
801	Unclassified_ABY1_1_ASV2465	Unclassified_ABY1_1_ASV2465	Absence	Presence
802	Unclassified_Parcubacteria_8_ASV4041	Unclassified_Parcubacteria_8_ASV4041	Absence	Presence
803	Mycoplasma_ASV1456	Mycoplasma_ASV1456	Absence	Presence
804	Mycoplasma_ASV1451	Mycoplasma_ASV1451	Absence	Presence
805	Mycoplasma_ASV1453	Mycoplasma_ASV1453	Absence	Presence
806	Mycoplasma_ASV1441	Mycoplasma_ASV1441	Absence	Presence
807	Mycoplasma_ASV1458	Mycoplasma_ASV1458	Absence	Presence
808	Mycoplasma_ASV1452	Mycoplasma_ASV1452	Absence	Presence
809	Brevinema_ASV365	Brevinema_ASV365	Absence	Presence
810	Brevinema_ASV366	Brevinema_ASV366	Absence	Presence
811	Brevinema_ASV363	Brevinema_ASV363	Absence	Presence
812	Deinococcus_ASV730	Deinococcus_ASV730	Absence	Presence
813	Streptobacillus_ASV2237	Streptobacillus_ASV2237	Absence	Presence
814	Unclassified_Leptotrichiaceae_1_ASV3785	Unclassified_Leptotrichiaceae_1_ASV3785	Absence	Presence
815	Fusobacterium_ASV979	Fusobacterium_ASV979	Absence	Presence
816	Atopostipes_ASV229	Atopostipes_ASV229	Absence	Presence
817	Vagococcus_ASV5036	Vagococcus_ASV5036	Absence	Presence
818	Abiotrophia_ASV32	Abiotrophia_ASV32	Absence	Presence
819	Enterococcus_ASV865	Enterococcus_ASV865	Absence	Presence
820	Enterococcus_ASV868	Enterococcus_ASV868	Absence	Presence
821	Enterococcus_ASV869	Enterococcus_ASV869	Absence	Presence
822	Bacillus_ASV255	Bacillus_ASV255	Absence	Presence
823	Unclassified_Staphylococcaceae_1_ASV4795	Unclassified_Staphylococcaceae_1_ASV4795	Absence	Presence
824	Staphylococcus_ASV2220	Staphylococcus_ASV2220	Absence	Presence
825	Unclassified_Staphylococcaceae_2_ASV4796	Unclassified_Staphylococcaceae_2_ASV4796	Absence	Presence
826	Lysinibacillus_ASV1293	Lysinibacillus_ASV1293	Absence	Presence
827	Bacillus_ASV265	Bacillus_ASV265	Absence	Presence
828	Bacillus_ASV264	Bacillus_ASV264	Absence	Presence
829	Bacillus_ASV251	Bacillus_ASV251	Absence	Presence
830	Exiguobacterium_ASV910	Exiguobacterium_ASV910	Absence	Presence
831	Bacillus_ASV253	Bacillus_ASV253	Absence	Presence
832	Gemella_ASV986	Gemella_ASV986	Absence	Presence
833	Gemella_ASV993	Gemella_ASV993	Absence	Presence
834	Unclassified_Bacillaceae_14_ASV2682	Unclassified_Bacillaceae_14_ASV2682	Absence	Presence
835	Domibacillus_ASV847	Domibacillus_ASV847	Absence	Presence
836	Unclassified_Marinococcaceae_3_ASV3810	Unclassified_Marinococcaceae_3_ASV3810	Absence	Presence
837	Unclassified_Marinococcaceae_8_ASV3815	Unclassified_Marinococcaceae_8_ASV3815	Absence	Presence
838	Unclassified_Marinococcaceae_1_ASV3808	Unclassified_Marinococcaceae_1_ASV3808	Absence	Presence
839	Unclassified_Marinococcaceae_4_ASV3811	Unclassified_Marinococcaceae_4_ASV3811	Absence	Presence
840	Unclassified_Marinococcaceae_2_ASV3809	Unclassified_Marinococcaceae_2_ASV3809	Absence	Presence
841	Unclassified_Bacillaceae_11_ASV2679	Unclassified_Bacillaceae_11_ASV2679	Absence	Presence
842	Bacillus_ASV258	Bacillus_ASV258	Absence	Presence
843	Bacillus_ASV266	Bacillus_ASV266	Absence	Presence
844	Unclassified_Bacillaceae_7_ASV2691	Unclassified_Bacillaceae_7_ASV2691	Absence	Presence
845	Lentibacillus_ASV1232	Lentibacillus_ASV1232	Absence	Presence
846	Unclassified_Bacillaceae_13_ASV2681	Unclassified_Bacillaceae_13_ASV2681	Absence	Presence
847	Oceanobacillus_ASV1530	Oceanobacillus_ASV1530	Absence	Presence
848	Bacillus_ASV257	Bacillus_ASV257	Absence	Presence
849	Lysinibacillus_ASV1294	Lysinibacillus_ASV1294	Absence	Presence
850	Unclassified_Planococcaceae_2_ASV4222	Unclassified_Planococcaceae_2_ASV4222	Absence	Presence
851	Lysinibacillus_ASV1295	Lysinibacillus_ASV1295	Absence	Presence
852	Weissella_ASV5081	Weissella_ASV5081	Absence	Presence
853	Leuconostoc_ASV1254	Leuconostoc_ASV1254	Absence	Presence
854	Leuconostoc_ASV1252	Leuconostoc_ASV1252	Absence	Presence
855	Fructobacillus_ASV967	Fructobacillus_ASV967	Absence	Presence
856	Leuconostoc_ASV1251	Leuconostoc_ASV1251	Absence	Presence
857	Leuconostoc_ASV1257	Leuconostoc_ASV1257	Absence	Presence
858	Unclassified_Lactobacillaceae_1_ASV3714	Unclassified_Lactobacillaceae_1_ASV3714	Absence	Presence
859	Unclassified_Lactobacillaceae_5_ASV3718	Unclassified_Lactobacillaceae_5_ASV3718	Absence	Presence
860	Lacticaseibacillus_ASV1172	Lacticaseibacillus_ASV1172	Absence	Presence
861	Lactobacillus_ASV1179	Lactobacillus_ASV1179	Absence	Presence
862	Apilactobacillus_ASV197	Apilactobacillus_ASV197	Absence	Presence
863	Unclassified_Gastranaerophilales_9_ASV3548	Unclassified_Gastranaerophilales_9_ASV3548	Absence	Presence
864	Unclassified_Cyanobacteriaceae_1_ASV3151	Unclassified_Cyanobacteriaceae_1_ASV3151	Absence	Presence
865	Unclassified_Cyanobacteriales_6_ASV3164	Unclassified_Cyanobacteriales_6_ASV3164	Absence	Presence
866	Unclassified_Cyanobacteriales_11_ASV3154	Unclassified_Cyanobacteriales_11_ASV3154	Absence	Presence
867	Phormidium_MBIC10003_ASV1663	Phormidium_MBIC10003_ASV1663	Absence	Presence
868	Phormidium_MBIC10003_ASV1662	Phormidium_MBIC10003_ASV1662	Absence	Presence
869	Phormidium_MBIC10003_ASV1661	Phormidium_MBIC10003_ASV1661	Absence	Presence
870	Phormidium_MBIC10003_ASV1659	Phormidium_MBIC10003_ASV1659	Absence	Presence
871	Unclassified_Xenococcaceae_2_ASV4968	Unclassified_Xenococcaceae_2_ASV4968	Absence	Presence
872	Unclassified_Cyanobacteriales_1_ASV3152	Unclassified_Cyanobacteriales_1_ASV3152	Absence	Presence
873	Unclassified_Phormidiaceae_1_ASV4102	Unclassified_Phormidiaceae_1_ASV4102	Absence	Presence
874	Unclassified_Cyanobacteriales_14_ASV3157	Unclassified_Cyanobacteriales_14_ASV3157	Absence	Presence
875	Unclassified_Coleofasciculaceae_3_ASV3101	Unclassified_Coleofasciculaceae_3_ASV3101	Absence	Presence
876	Coleofasciculus_PCC-7420_ASV634	Coleofasciculus_PCC-7420_ASV634	Absence	Presence
877	Unclassified_Coleofasciculaceae_4_ASV3102	Unclassified_Coleofasciculaceae_4_ASV3102	Absence	Presence
878	Chalicogloea_CCALA_975_ASV507	Chalicogloea_CCALA_975_ASV507	Absence	Presence
879	Unclassified_Leptolyngbyaceae_8_ASV3781	Unclassified_Leptolyngbyaceae_8_ASV3781	Absence	Presence
880	Unclassified_Leptolyngbyaceae_12_ASV3771	Unclassified_Leptolyngbyaceae_12_ASV3771	Absence	Presence
881	Leptolyngbya_ANT.L52.2_ASV1236	Leptolyngbya_ANT.L52.2_ASV1236	Absence	Presence
882	Unclassified_Cyanobacteriia_3_ASV3170	Unclassified_Cyanobacteriia_3_ASV3170	Absence	Presence
883	Scytonema_VB-61278_ASV2051	Scytonema_VB-61278_ASV2051	Absence	Presence
884	Scytonema_VB-61278_ASV2048	Scytonema_VB-61278_ASV2048	Absence	Presence
885	Scytonema_VB-61278_ASV2049	Scytonema_VB-61278_ASV2049	Absence	Presence
886	Scytonema_VB-61278_ASV2044	Scytonema_VB-61278_ASV2044	Absence	Presence
887	Calothrix_UAM_374_ASV400	Calothrix_UAM_374_ASV400	Absence	Presence
888	Cyanobium_PCC-6307_ASV711	Cyanobium_PCC-6307_ASV711	Absence	Presence
889	Cyanobium_PCC-6307_ASV705	Cyanobium_PCC-6307_ASV705	Absence	Presence
890	Cyanobium_PCC-6307_ASV707	Cyanobium_PCC-6307_ASV707	Absence	Presence
891	Unclassified_Vampirovibrionales_ASV5037	Unclassified_Vampirovibrionales_ASV5037	Absence	Presence
892	Unclassified_Gastranaerophilales_2_ASV3541	Unclassified_Gastranaerophilales_2_ASV3541	Absence	Presence
893	Unclassified_Gastranaerophilales_4_ASV3543	Unclassified_Gastranaerophilales_4_ASV3543	Absence	Presence
894	Unclassified_Gastranaerophilales_1_ASV3537	Unclassified_Gastranaerophilales_1_ASV3537	Absence	Presence
895	Unclassified_Gastranaerophilales_12_ASV3540	Unclassified_Gastranaerophilales_12_ASV3540	Absence	Presence
896	Unclassified_Gastranaerophilales_8_ASV3547	Unclassified_Gastranaerophilales_8_ASV3547	Absence	Presence
897	Unclassified_Gastranaerophilales_7_ASV3546	Unclassified_Gastranaerophilales_7_ASV3546	Absence	Presence
898	Unclassified_Obscuribacteraceae_3_ASV3991	Unclassified_Obscuribacteraceae_3_ASV3991	Absence	Presence
899	Unclassified_Obscuribacteraceae_4_ASV3992	Unclassified_Obscuribacteraceae_4_ASV3992	Absence	Presence
900	Unclassified_Obscuribacteraceae_2_ASV3990	Unclassified_Obscuribacteraceae_2_ASV3990	Absence	Presence
901	Unclassified_Sericytochromatia_1_ASV4712	Unclassified_Sericytochromatia_1_ASV4712	Absence	Presence
902	Veillonella_ASV5040	Veillonella_ASV5040	Absence	Presence
903	Veillonella_ASV5038	Veillonella_ASV5038	Absence	Presence
904	Unclassified_Erysipelotrichaceae_5_ASV3369	Unclassified_Erysipelotrichaceae_5_ASV3369	Absence	Presence
905	Unclassified_Erysipelotrichaceae_7_ASV3371	Unclassified_Erysipelotrichaceae_7_ASV3371	Absence	Presence
906	Unclassified_Erysipelotrichaceae_4_ASV3368	Unclassified_Erysipelotrichaceae_4_ASV3368	Absence	Presence
907	Unclassified_Erysipelotrichaceae_6_ASV3370	Unclassified_Erysipelotrichaceae_6_ASV3370	Absence	Presence
908	Erysipelotrichaceae_UCG-009_ASV889	Erysipelotrichaceae_UCG-009_ASV889	Absence	Presence
909	Erysipelotrichaceae_UCG-009_ASV888	Erysipelotrichaceae_UCG-009_ASV888	Absence	Presence
910	Erysipelotrichaceae_UCG-009_ASV887	Erysipelotrichaceae_UCG-009_ASV887	Absence	Presence
911	Solobacterium_ASV2110	Solobacterium_ASV2110	Absence	Presence
912	Unclassified_Erysipelotrichaceae_1_ASV3365	Unclassified_Erysipelotrichaceae_1_ASV3365	Absence	Presence
913	Solobacterium_ASV2107	Solobacterium_ASV2107	Absence	Presence
914	Solobacterium_ASV2108	Solobacterium_ASV2108	Absence	Presence
915	Streptococcus_ASV2251	Streptococcus_ASV2251	Absence	Presence
916	Streptococcus_ASV2248	Streptococcus_ASV2248	Absence	Presence
917	Streptococcus_ASV2242	Streptococcus_ASV2242	Absence	Presence
918	Streptococcus_ASV2247	Streptococcus_ASV2247	Absence	Presence
919	Streptococcus_ASV2246	Streptococcus_ASV2246	Absence	Presence
920	Streptococcus_ASV2240	Streptococcus_ASV2240	Absence	Presence
921	Streptococcus_ASV2255	Streptococcus_ASV2255	Absence	Presence
922	Streptococcus_ASV2241	Streptococcus_ASV2241	Absence	Presence
923	Lactococcus_ASV1181	Lactococcus_ASV1181	Absence	Presence
924	Ureaplasma_ASV5034	Ureaplasma_ASV5034	Absence	Presence
925	Ureaplasma_ASV5029	Ureaplasma_ASV5029	Absence	Presence
926	Ureaplasma_ASV5028	Ureaplasma_ASV5028	Absence	Presence
927	Ureaplasma_ASV5027	Ureaplasma_ASV5027	Absence	Presence
928	Unclassified_Enterobacteriaceae_6_ASV3343	Unclassified_Enterobacteriaceae_6_ASV3343	Absence	Presence
929	Unclassified_RF39_12_ASV4273	Unclassified_RF39_12_ASV4273	Absence	Presence
930	Unclassified_RF39_18_ASV4279	Unclassified_RF39_18_ASV4279	Absence	Presence
931	Unclassified_RF39_9_ASV4292	Unclassified_RF39_9_ASV4292	Absence	Presence
932	Unclassified_RF39_7_ASV4290	Unclassified_RF39_7_ASV4290	Absence	Presence
933	Unclassified_RF39_3_ASV4286	Unclassified_RF39_3_ASV4286	Absence	Presence
934	Unclassified_RF39_22_ASV4284	Unclassified_RF39_22_ASV4284	Absence	Presence
935	Unclassified_RF39_8_ASV4291	Unclassified_RF39_8_ASV4291	Absence	Presence
936	Unclassified_RF39_16_ASV4277	Unclassified_RF39_16_ASV4277	Absence	Presence
937	Unclassified_RF39_10_ASV4271	Unclassified_RF39_10_ASV4271	Absence	Presence
938	Unclassified_RF39_20_ASV4282	Unclassified_RF39_20_ASV4282	Absence	Presence
939	Unclassified_RF39_23_ASV4285	Unclassified_RF39_23_ASV4285	Absence	Presence
940	Unclassified_RF39_5_ASV4288	Unclassified_RF39_5_ASV4288	Absence	Presence
941	Unclassified_RF39_21_ASV4283	Unclassified_RF39_21_ASV4283	Absence	Presence
942	Unclassified_RF39_1_ASV4270	Unclassified_RF39_1_ASV4270	Absence	Presence
943	Unclassified_RF39_6_ASV4289	Unclassified_RF39_6_ASV4289	Absence	Presence
944	Unclassified_RF39_17_ASV4278	Unclassified_RF39_17_ASV4278	Absence	Presence
945	Unclassified_RF39_13_ASV4274	Unclassified_RF39_13_ASV4274	Absence	Presence
946	Unclassified_RF39_2_ASV4281	Unclassified_RF39_2_ASV4281	Absence	Presence
947	Unclassified_RF39_11_ASV4272	Unclassified_RF39_11_ASV4272	Absence	Presence
948	Unclassified_RF39_4_ASV4287	Unclassified_RF39_4_ASV4287	Absence	Presence
949	Anaerovorax_ASV194	Anaerovorax_ASV194	Absence	Presence
950	[Eubacterium]_nodatum_group_ASV7	[Eubacterium]_nodatum_group_ASV7	Absence	Presence
951	[Eubacterium]_nodatum_group_ASV6	[Eubacterium]_nodatum_group_ASV6	Absence	Presence
952	Family_XIII_AD3011_group_ASV915	Family_XIII_AD3011_group_ASV915	Absence	Presence
953	Family_XIII_AD3011_group_ASV916	Family_XIII_AD3011_group_ASV916	Absence	Presence
954	[Eubacterium]_nodatum_group_ASV8	[Eubacterium]_nodatum_group_ASV8	Absence	Presence
955	Family_XIII_UCG-001_ASV917	Family_XIII_UCG-001_ASV917	Absence	Presence
956	Mogibacterium_ASV1404	Mogibacterium_ASV1404	Absence	Presence
957	Mogibacterium_ASV1405	Mogibacterium_ASV1405	Absence	Presence
958	Anaerococcus_ASV188	Anaerococcus_ASV188	Absence	Presence
959	Anaerococcus_ASV186	Anaerococcus_ASV186	Absence	Presence
960	Peptoniphilus_ASV1620	Peptoniphilus_ASV1620	Absence	Presence
961	ZOR0006_ASV5117	ZOR0006_ASV5117	Absence	Presence
962	Fretibacterium_ASV962	Fretibacterium_ASV962	Absence	Presence
963	Anaerofustis_ASV189	Anaerofustis_ASV189	Absence	Presence
964	Unclassified_Peptococcaceae_4_ASV4096	Unclassified_Peptococcaceae_4_ASV4096	Absence	Presence
965	Paenibacillus_ASV1575	Paenibacillus_ASV1575	Absence	Presence
966	Paenibacillus_ASV1574	Paenibacillus_ASV1574	Absence	Presence
967	Unclassified_Christensenellaceae_6_ASV3051	Unclassified_Christensenellaceae_6_ASV3051	Absence	Presence
968	Terrisporobacter_ASV2344	Terrisporobacter_ASV2344	Absence	Presence
969	Unclassified_Peptostreptococcaceae_1_ASV4097	Unclassified_Peptostreptococcaceae_1_ASV4097	Absence	Presence
970	Paeniclostridium_ASV1577	Paeniclostridium_ASV1577	Absence	Presence
971	Sedimentibacter_ASV2052	Sedimentibacter_ASV2052	Absence	Presence
972	[Eubacterium]_hallii_group_ASV4	[Eubacterium]_hallii_group_ASV4	Absence	Presence
973	[Eubacterium]_hallii_group_ASV5	[Eubacterium]_hallii_group_ASV5	Absence	Presence
974	Unclassified_Clostridia_UCG-014_4_ASV3092	Unclassified_Clostridia_UCG-014_4_ASV3092	Absence	Presence
975	Unclassified_Clostridia_UCG-014_2_ASV3090	Unclassified_Clostridia_UCG-014_2_ASV3090	Absence	Presence
976	Unclassified_Clostridia_UCG-014_3_ASV3091	Unclassified_Clostridia_UCG-014_3_ASV3091	Absence	Presence
977	Unclassified_Clostridia_UCG-014_7_ASV3095	Unclassified_Clostridia_UCG-014_7_ASV3095	Absence	Presence
978	Unclassified_Clostridia_UCG-014_13_ASV3089	Unclassified_Clostridia_UCG-014_13_ASV3089	Absence	Presence
979	Unclassified_Clostridia_UCG-014_9_ASV3097	Unclassified_Clostridia_UCG-014_9_ASV3097	Absence	Presence
980	Unclassified_Clostridia_UCG-014_1_ASV3085	Unclassified_Clostridia_UCG-014_1_ASV3085	Absence	Presence
981	Unclassified_Clostridia_UCG-014_12_ASV3088	Unclassified_Clostridia_UCG-014_12_ASV3088	Absence	Presence
982	Unclassified_Clostridia_UCG-014_10_ASV3086	Unclassified_Clostridia_UCG-014_10_ASV3086	Absence	Presence
983	Unclassified_Clostridia_UCG-014_6_ASV3094	Unclassified_Clostridia_UCG-014_6_ASV3094	Absence	Presence
984	Unclassified_Clostridia_UCG-014_11_ASV3087	Unclassified_Clostridia_UCG-014_11_ASV3087	Absence	Presence
985	Unclassified_Clostridia_UCG-014_5_ASV3093	Unclassified_Clostridia_UCG-014_5_ASV3093	Absence	Presence
986	Unclassified_Lachnospirales_1_ASV3713	Unclassified_Lachnospirales_1_ASV3713	Absence	Presence
987	[Eubacterium]_ruminantium_group_ASV9	[Eubacterium]_ruminantium_group_ASV9	Absence	Presence
988	Lachnospiraceae_UCG-008_ASV1169	Lachnospiraceae_UCG-008_ASV1169	Absence	Presence
989	Unclassified_Lachnospiraceae_18_ASV3691	Unclassified_Lachnospiraceae_18_ASV3691	Absence	Presence
990	Butyrivibrio_ASV383	Butyrivibrio_ASV383	Absence	Presence
991	Syntrophococcus_ASV2316	Syntrophococcus_ASV2316	Absence	Presence
992	Unclassified_Lachnospiraceae_20_ASV3694	Unclassified_Lachnospiraceae_20_ASV3694	Absence	Presence
993	Unclassified_Lachnospiraceae_8_ASV3711	Unclassified_Lachnospiraceae_8_ASV3711	Absence	Presence
994	Lachnospiraceae_UCG-002_ASV1168	Lachnospiraceae_UCG-002_ASV1168	Absence	Presence
995	Unclassified_Lachnospiraceae_21_ASV3695	Unclassified_Lachnospiraceae_21_ASV3695	Absence	Presence
996	Unclassified_Lachnospiraceae_1_ASV3682	Unclassified_Lachnospiraceae_1_ASV3682	Absence	Presence
997	Unclassified_Lachnospiraceae_26_ASV3700	Unclassified_Lachnospiraceae_26_ASV3700	Absence	Presence
998	Unclassified_Lachnospiraceae_24_ASV3698	Unclassified_Lachnospiraceae_24_ASV3698	Absence	Presence
999	[Eubacterium]_ventriosum_group_ASV11	[Eubacterium]_ventriosum_group_ASV11	Absence	Presence
1000	Roseburia_ASV1900	Roseburia_ASV1900	Absence	Presence
1001	Lachnospiraceae_XPB1014_group_ASV1170	Lachnospiraceae_XPB1014_group_ASV1170	Absence	Presence
1002	Unclassified_Lachnospiraceae_6_ASV3709	Unclassified_Lachnospiraceae_6_ASV3709	Absence	Presence
1003	Marvinbryantia_ASV1329	Marvinbryantia_ASV1329	Absence	Presence
1004	Lachnoanaerobaculum_ASV1150	Lachnoanaerobaculum_ASV1150	Absence	Presence
1005	Lachnospiraceae_UCG-002_ASV1167	Lachnospiraceae_UCG-002_ASV1167	Absence	Presence
1006	Lachnospiraceae_NK3A20_group_ASV1162	Lachnospiraceae_NK3A20_group_ASV1162	Absence	Presence
1007	Lachnospiraceae_NK3A20_group_ASV1163	Lachnospiraceae_NK3A20_group_ASV1163	Absence	Presence
1008	Acetitomaculum_ASV35	Acetitomaculum_ASV35	Absence	Presence
1009	Acetitomaculum_ASV36	Acetitomaculum_ASV36	Absence	Presence
1010	Acetitomaculum_ASV37	Acetitomaculum_ASV37	Absence	Presence
1011	[Ruminococcus]_gauvreauii_group_ASV12	[Ruminococcus]_gauvreauii_group_ASV12	Absence	Presence
1012	Roseburia_ASV1901	Roseburia_ASV1901	Absence	Presence
1013	Unclassified_Lachnospiraceae_19_ASV3692	Unclassified_Lachnospiraceae_19_ASV3692	Absence	Presence
1014	NK4A214_group_ASV1489	NK4A214_group_ASV1489	Absence	Presence
1015	UCG-002_ASV2403	UCG-002_ASV2403	Absence	Presence
1016	NK4A214_group_ASV1493	NK4A214_group_ASV1493	Absence	Presence
1017	UCG-005_ASV2404	UCG-005_ASV2404	Absence	Presence
1018	UCG-005_ASV2407	UCG-005_ASV2407	Absence	Presence
1019	Monoglobus_ASV1408	Monoglobus_ASV1408	Absence	Presence
1020	NK4A214_group_ASV1491	NK4A214_group_ASV1491	Absence	Presence
1021	NK4A214_group_ASV1490	NK4A214_group_ASV1490	Absence	Presence
1022	NK4A214_group_ASV1492	NK4A214_group_ASV1492	Absence	Presence
1023	NK4A214_group_ASV1494	NK4A214_group_ASV1494	Absence	Presence
1024	Unclassified_Ruminococcaceae_18_ASV4498	Unclassified_Ruminococcaceae_18_ASV4498	Absence	Presence
1025	Ruminococcus_ASV1952	Ruminococcus_ASV1952	Absence	Presence
1026	Unclassified_Ruminococcaceae_2_ASV4499	Unclassified_Ruminococcaceae_2_ASV4499	Absence	Presence
1027	Unclassified_Ruminococcaceae_9_ASV4506	Unclassified_Ruminococcaceae_9_ASV4506	Absence	Presence
1028	Unclassified_Ruminococcaceae_3_ASV4500	Unclassified_Ruminococcaceae_3_ASV4500	Absence	Presence
1029	Unclassified_Ruminococcaceae_10_ASV4490	Unclassified_Ruminococcaceae_10_ASV4490	Absence	Presence
1030	Ruminococcus_ASV1953	Ruminococcus_ASV1953	Absence	Presence
1031	Unclassified_Ruminococcaceae_6_ASV4503	Unclassified_Ruminococcaceae_6_ASV4503	Absence	Presence
1032	Unclassified_Ruminococcaceae_12_ASV4492	Unclassified_Ruminococcaceae_12_ASV4492	Absence	Presence
1033	Unclassified_Ruminococcaceae_13_ASV4493	Unclassified_Ruminococcaceae_13_ASV4493	Absence	Presence
1034	Unclassified_Ruminococcaceae_14_ASV4494	Unclassified_Ruminococcaceae_14_ASV4494	Absence	Presence
1035	Unclassified_Ruminococcaceae_17_ASV4497	Unclassified_Ruminococcaceae_17_ASV4497	Absence	Presence
1036	Unclassified_Ruminococcaceae_7_ASV4504	Unclassified_Ruminococcaceae_7_ASV4504	Absence	Presence
1037	Unclassified_Ruminococcaceae_8_ASV4505	Unclassified_Ruminococcaceae_8_ASV4505	Absence	Presence
1038	Faecalibacterium_ASV914	Faecalibacterium_ASV914	Absence	Presence
1039	Unclassified_Ruminococcaceae_5_ASV4502	Unclassified_Ruminococcaceae_5_ASV4502	Absence	Presence
1040	Unclassified_[Eubacterium]_coprostanoligenes_group_2_ASV2417	Unclassified_[Eubacterium]_coprostanoligenes_group_2_ASV2417	Absence	Presence
1041	UCG-009_ASV2408	UCG-009_ASV2408	Absence	Presence
1042	Saccharofermentans_ASV1957	Saccharofermentans_ASV1957	Absence	Presence
1043	Christensenellaceae_R-7_group_ASV536	Christensenellaceae_R-7_group_ASV536	Absence	Presence
1044	Christensenellaceae_R-7_group_ASV527	Christensenellaceae_R-7_group_ASV527	Absence	Presence
1045	Clostridium_sensu_stricto_1_ASV600	Clostridium_sensu_stricto_1_ASV600	Absence	Presence
1046	Clostridium_sensu_stricto_1_ASV609	Clostridium_sensu_stricto_1_ASV609	Absence	Presence
1047	Clostridium_sensu_stricto_1_ASV591	Clostridium_sensu_stricto_1_ASV591	Absence	Presence
1048	Clostridium_sensu_stricto_1_ASV610	Clostridium_sensu_stricto_1_ASV610	Absence	Presence
1049	Clostridium_sensu_stricto_1_ASV606	Clostridium_sensu_stricto_1_ASV606	Absence	Presence
1050	Clostridium_sensu_stricto_1_ASV573	Clostridium_sensu_stricto_1_ASV573	Absence	Presence
1051	Clostridium_sensu_stricto_1_ASV577	Clostridium_sensu_stricto_1_ASV577	Absence	Presence
1052	Clostridium_sensu_stricto_1_ASV622	Clostridium_sensu_stricto_1_ASV622	Absence	Presence
1053	Clostridium_sensu_stricto_1_ASV621	Clostridium_sensu_stricto_1_ASV621	Absence	Presence
1054	Clostridium_sensu_stricto_1_ASV625	Clostridium_sensu_stricto_1_ASV625	Absence	Presence
1055	Clostridium_sensu_stricto_1_ASV619	Clostridium_sensu_stricto_1_ASV619	Absence	Presence
1056	Christensenellaceae_R-7_group_ASV532	Christensenellaceae_R-7_group_ASV532	Absence	Presence
1057	Christensenellaceae_R-7_group_ASV513	Christensenellaceae_R-7_group_ASV513	Absence	Presence
1058	Christensenellaceae_R-7_group_ASV514	Christensenellaceae_R-7_group_ASV514	Absence	Presence
1059	Christensenellaceae_R-7_group_ASV516	Christensenellaceae_R-7_group_ASV516	Absence	Presence
1060	Christensenellaceae_R-7_group_ASV538	Christensenellaceae_R-7_group_ASV538	Absence	Presence
1061	Christensenellaceae_R-7_group_ASV537	Christensenellaceae_R-7_group_ASV537	Absence	Presence
1062	Christensenellaceae_R-7_group_ASV542	Christensenellaceae_R-7_group_ASV542	Absence	Presence
1063	Christensenellaceae_R-7_group_ASV534	Christensenellaceae_R-7_group_ASV534	Absence	Presence
1064	Christensenellaceae_R-7_group_ASV533	Christensenellaceae_R-7_group_ASV533	Absence	Presence
1065	Christensenellaceae_R-7_group_ASV518	Christensenellaceae_R-7_group_ASV518	Absence	Presence
1066	Christensenellaceae_R-7_group_ASV519	Christensenellaceae_R-7_group_ASV519	Absence	Presence
1067	Christensenellaceae_R-7_group_ASV520	Christensenellaceae_R-7_group_ASV520	Absence	Presence
1068	Christensenellaceae_R-7_group_ASV521	Christensenellaceae_R-7_group_ASV521	Absence	Presence
1069	Christensenellaceae_R-7_group_ASV526	Christensenellaceae_R-7_group_ASV526	Absence	Presence
1070	Christensenellaceae_R-7_group_ASV529	Christensenellaceae_R-7_group_ASV529	Absence	Presence
1071	Christensenellaceae_R-7_group_ASV523	Christensenellaceae_R-7_group_ASV523	Absence	Presence
1072	Christensenellaceae_R-7_group_ASV515	Christensenellaceae_R-7_group_ASV515	Absence	Presence
1073	Christensenellaceae_R-7_group_ASV524	Christensenellaceae_R-7_group_ASV524	Absence	Presence
1074	Unclassified_Acholeplasmataceae_1_ASV2477	Unclassified_Acholeplasmataceae_1_ASV2477	Absence	Presence

## Sheet: Structural_zero_female_BKA_high
	Taxon	species	Low	High
1	Unclassified_Calditrichaceae_7_ASV2978	Unclassified_Calditrichaceae_7_ASV2978	Presence	Absence
2	Unclassified_Fibrobacterales_3_ASV3382	Unclassified_Fibrobacterales_3_ASV3382	Presence	Absence
3	Melioribacter_ASV1343	Melioribacter_ASV1343	Presence	Absence
4	Unclassified_Balneolaceae_43_ASV2794	Unclassified_Balneolaceae_43_ASV2794	Presence	Absence
5	Unclassified_Balneolaceae_76_ASV2830	Unclassified_Balneolaceae_76_ASV2830	Presence	Absence
6	Unclassified_Balneolaceae_61_ASV2814	Unclassified_Balneolaceae_61_ASV2814	Presence	Absence
7	Unclassified_Balneolaceae_62_ASV2815	Unclassified_Balneolaceae_62_ASV2815	Presence	Absence
8	Unclassified_Balneolaceae_6_ASV2812	Unclassified_Balneolaceae_6_ASV2812	Presence	Absence
9	Unclassified_Balneolaceae_45_ASV2796	Unclassified_Balneolaceae_45_ASV2796	Presence	Absence
10	Unclassified_Balneolaceae_35_ASV2785	Unclassified_Balneolaceae_35_ASV2785	Presence	Absence
11	Mucilaginibacter_ASV1414	Mucilaginibacter_ASV1414	Presence	Absence
12	Unclassified_Sphingobacteriaceae_3_ASV4744	Unclassified_Sphingobacteriaceae_3_ASV4744	Presence	Absence
13	Unclassified_NS9_marine_group_1_ASV3987	Unclassified_NS9_marine_group_1_ASV3987	Presence	Absence
14	Unclassified_KD3-93_ASV1135	Unclassified_KD3-93_ASV1135	Presence	Absence
15	Unclassified_Bacteroidales_2_ASV2716	Unclassified_Bacteroidales_2_ASV2716	Presence	Absence
16	Unclassified_Lentimicrobiaceae_9_ASV3766	Unclassified_Lentimicrobiaceae_9_ASV3766	Presence	Absence
17	Taibaiella_ASV2321	Taibaiella_ASV2321	Presence	Absence
18	Unclassified_Saprospiraceae_53_ASV4574	Unclassified_Saprospiraceae_53_ASV4574	Presence	Absence
19	Unclassified_Saprospiraceae_20_ASV4538	Unclassified_Saprospiraceae_20_ASV4538	Presence	Absence
20	Phaeodactylibacter_ASV1643	Phaeodactylibacter_ASV1643	Presence	Absence
21	Phaeodactylibacter_ASV1642	Phaeodactylibacter_ASV1642	Presence	Absence
22	Phaeodactylibacter_ASV1636	Phaeodactylibacter_ASV1636	Presence	Absence
23	Unclassified_Saprospiraceae_32_ASV4551	Unclassified_Saprospiraceae_32_ASV4551	Presence	Absence
24	Unclassified_Saprospiraceae_46_ASV4566	Unclassified_Saprospiraceae_46_ASV4566	Presence	Absence
25	Unclassified_Saprospiraceae_37_ASV4556	Unclassified_Saprospiraceae_37_ASV4556	Presence	Absence
26	Unclassified_Saprospiraceae_18_ASV4535	Unclassified_Saprospiraceae_18_ASV4535	Presence	Absence
27	Unclassified_Saprospiraceae_4_ASV4559	Unclassified_Saprospiraceae_4_ASV4559	Presence	Absence
28	Unclassified_Saprospiraceae_2_ASV4537	Unclassified_Saprospiraceae_2_ASV4537	Presence	Absence
29	Unclassified_Saprospiraceae_49_ASV4569	Unclassified_Saprospiraceae_49_ASV4569	Presence	Absence
30	OLB8_ASV1545	OLB8_ASV1545	Presence	Absence
31	Terrimonas_ASV2342	Terrimonas_ASV2342	Presence	Absence
32	Unclassified_Chitinophagaceae_2_ASV3021	Unclassified_Chitinophagaceae_2_ASV3021	Presence	Absence
33	Flavisolibacter_ASV936	Flavisolibacter_ASV936	Presence	Absence
34	Unclassified_Chitinophagaceae_1_ASV3010	Unclassified_Chitinophagaceae_1_ASV3010	Presence	Absence
35	Flavisolibacter_ASV940	Flavisolibacter_ASV940	Presence	Absence
36	Flavisolibacter_ASV943	Flavisolibacter_ASV943	Presence	Absence
37	Flavisolibacter_ASV944	Flavisolibacter_ASV944	Presence	Absence
38	Flavisolibacter_ASV941	Flavisolibacter_ASV941	Presence	Absence
39	Flavisolibacter_ASV934	Flavisolibacter_ASV934	Presence	Absence
40	Unclassified_Chitinophagaceae_4_ASV3027	Unclassified_Chitinophagaceae_4_ASV3027	Presence	Absence
41	Unclassified_Chitinophagaceae_11_ASV3012	Unclassified_Chitinophagaceae_11_ASV3012	Presence	Absence
42	Unclassified_Chitinophagaceae_21_ASV3023	Unclassified_Chitinophagaceae_21_ASV3023	Presence	Absence
43	Unclassified_Chitinophagaceae_23_ASV3025	Unclassified_Chitinophagaceae_23_ASV3025	Presence	Absence
44	Unclassified_Chitinophagales_1_ASV3033	Unclassified_Chitinophagales_1_ASV3033	Presence	Absence
45	Unclassified_Saprospiraceae_15_ASV4532	Unclassified_Saprospiraceae_15_ASV4532	Presence	Absence
46	Brumimicrobium_ASV375	Brumimicrobium_ASV375	Presence	Absence
47	Brumimicrobium_ASV377	Brumimicrobium_ASV377	Presence	Absence
48	Unclassified_AKYH767_1_ASV2533	Unclassified_AKYH767_1_ASV2533	Presence	Absence
49	Unclassified_Bacteroidetes_BD2-2_11_ASV2726	Unclassified_Bacteroidetes_BD2-2_11_ASV2726	Presence	Absence
50	Unclassified_Bacteroidetes_BD2-2_15_ASV2730	Unclassified_Bacteroidetes_BD2-2_15_ASV2730	Presence	Absence
51	Unclassified_Bacteroidales_6_ASV2720	Unclassified_Bacteroidales_6_ASV2720	Presence	Absence
52	Unclassified_Prolixibacteraceae_2_ASV4235	Unclassified_Prolixibacteraceae_2_ASV4235	Presence	Absence
53	Sunxiuqinia_ASV2283	Sunxiuqinia_ASV2283	Presence	Absence
54	Unclassified_Marinilabiliaceae_2_ASV3800	Unclassified_Marinilabiliaceae_2_ASV3800	Presence	Absence
55	Unclassified_Flavobacteriaceae_20_ASV3404	Unclassified_Flavobacteriaceae_20_ASV3404	Presence	Absence
56	Unclassified_Flavobacteriaceae_43_ASV3429	Unclassified_Flavobacteriaceae_43_ASV3429	Presence	Absence
57	Pseudofulvibacter_ASV1743	Pseudofulvibacter_ASV1743	Presence	Absence
58	Unclassified_Flavobacteriaceae_25_ASV3409	Unclassified_Flavobacteriaceae_25_ASV3409	Presence	Absence
59	Unclassified_Flavobacteriaceae_3_ASV3414	Unclassified_Flavobacteriaceae_3_ASV3414	Presence	Absence
60	Unclassified_Flavobacteriaceae_1_ASV3392	Unclassified_Flavobacteriaceae_1_ASV3392	Presence	Absence
61	Unclassified_Flavobacteriaceae_56_ASV3443	Unclassified_Flavobacteriaceae_56_ASV3443	Presence	Absence
62	Psychroflexus_ASV1790	Psychroflexus_ASV1790	Presence	Absence
63	Psychroflexus_ASV1789	Psychroflexus_ASV1789	Presence	Absence
64	Unclassified_Flavobacteriaceae_38_ASV3423	Unclassified_Flavobacteriaceae_38_ASV3423	Presence	Absence
65	Unclassified_Flavobacteriaceae_37_ASV3422	Unclassified_Flavobacteriaceae_37_ASV3422	Presence	Absence
66	Psychroflexus_ASV1791	Psychroflexus_ASV1791	Presence	Absence
67	Gramella_ASV1032	Gramella_ASV1032	Presence	Absence
68	Gramella_ASV1034	Gramella_ASV1034	Presence	Absence
69	Unclassified_Flavobacteriaceae_29_ASV3413	Unclassified_Flavobacteriaceae_29_ASV3413	Presence	Absence
70	Unclassified_Flavobacteriaceae_12_ASV3395	Unclassified_Flavobacteriaceae_12_ASV3395	Presence	Absence
71	Unclassified_Flavobacteriaceae_23_ASV3407	Unclassified_Flavobacteriaceae_23_ASV3407	Presence	Absence
72	Unclassified_Flavobacteriales_1_ASV3451	Unclassified_Flavobacteriales_1_ASV3451	Presence	Absence
73	Psychroflexus_ASV1793	Psychroflexus_ASV1793	Presence	Absence
74	NS5_marine_group_ASV1520	NS5_marine_group_ASV1520	Presence	Absence
75	NS5_marine_group_ASV1521	NS5_marine_group_ASV1521	Presence	Absence
76	Unclassified_Flavobacteriaceae_31_ASV3416	Unclassified_Flavobacteriaceae_31_ASV3416	Presence	Absence
77	Unclassified_Flavobacteriaceae_48_ASV3434	Unclassified_Flavobacteriaceae_48_ASV3434	Presence	Absence
78	Unclassified_Flavobacteriaceae_4_ASV3425	Unclassified_Flavobacteriaceae_4_ASV3425	Presence	Absence
79	Unclassified_Flavobacteriaceae_47_ASV3433	Unclassified_Flavobacteriaceae_47_ASV3433	Presence	Absence
80	Unclassified_Flavobacteriaceae_10_ASV3393	Unclassified_Flavobacteriaceae_10_ASV3393	Presence	Absence
81	Unclassified_Flavobacteriaceae_32_ASV3417	Unclassified_Flavobacteriaceae_32_ASV3417	Presence	Absence
82	Elizabethkingia_ASV857	Elizabethkingia_ASV857	Presence	Absence
83	Bergeyella_ASV314	Bergeyella_ASV314	Presence	Absence
84	Unclassified_Weeksellaceae_3_ASV4936	Unclassified_Weeksellaceae_3_ASV4936	Presence	Absence
85	Flavobacterium_ASV953	Flavobacterium_ASV953	Presence	Absence
86	Flavobacterium_ASV949	Flavobacterium_ASV949	Presence	Absence
87	Capnocytophaga_ASV493	Capnocytophaga_ASV493	Presence	Absence
88	Aequorivita_ASV95	Aequorivita_ASV95	Presence	Absence
89	Unclassified_Flavobacteriaceae_44_ASV3430	Unclassified_Flavobacteriaceae_44_ASV3430	Presence	Absence
90	Gramella_ASV1031	Gramella_ASV1031	Presence	Absence
91	Anaerophaga_ASV192	Anaerophaga_ASV192	Presence	Absence
92	Alloprevotella_ASV140	Alloprevotella_ASV140	Presence	Absence
93	Prevotella_7_ASV1715	Prevotella_7_ASV1715	Presence	Absence
94	Proteiniphilum_ASV1729	Proteiniphilum_ASV1729	Presence	Absence
95	Dysgonomonas_ASV854	Dysgonomonas_ASV854	Presence	Absence
96	Bacteroides_ASV274	Bacteroides_ASV274	Presence	Absence
97	Unclassified_Muribaculaceae_2_ASV3907	Unclassified_Muribaculaceae_2_ASV3907	Presence	Absence
98	Unclassified_Muribaculaceae_1_ASV3906	Unclassified_Muribaculaceae_1_ASV3906	Presence	Absence
99	Unclassified_Cyclobacteriaceae_2_ASV3183	Unclassified_Cyclobacteriaceae_2_ASV3183	Presence	Absence
100	Unclassified_Cyclobacteriaceae_5_ASV3199	Unclassified_Cyclobacteriaceae_5_ASV3199	Presence	Absence
101	Hymenobacter_ASV1106	Hymenobacter_ASV1106	Presence	Absence
102	Hymenobacter_ASV1108	Hymenobacter_ASV1108	Presence	Absence
103	Adhaeribacter_ASV91	Adhaeribacter_ASV91	Presence	Absence
104	Adhaeribacter_ASV92	Adhaeribacter_ASV92	Presence	Absence
105	Adhaeribacter_ASV90	Adhaeribacter_ASV90	Presence	Absence
106	Rhodocytophaga_ASV1839	Rhodocytophaga_ASV1839	Presence	Absence
107	Persicitalea_ASV1633	Persicitalea_ASV1633	Presence	Absence
108	Unclassified_Microscillaceae_2_ASV3872	Unclassified_Microscillaceae_2_ASV3872	Presence	Absence
109	Unclassified_Cyclobacteriaceae_24_ASV3188	Unclassified_Cyclobacteriaceae_24_ASV3188	Presence	Absence
110	Unclassified_Cyclobacteriaceae_7_ASV3201	Unclassified_Cyclobacteriaceae_7_ASV3201	Presence	Absence
111	Unclassified_Cytophagales_4_ASV3209	Unclassified_Cytophagales_4_ASV3209	Presence	Absence
112	Unclassified_Cyclobacteriaceae_30_ASV3195	Unclassified_Cyclobacteriaceae_30_ASV3195	Presence	Absence
113	Unclassified_Rhodothermaceae_22_ASV4473	Unclassified_Rhodothermaceae_22_ASV4473	Presence	Absence
114	Salisaeta_ASV2027	Salisaeta_ASV2027	Presence	Absence
115	Salisaeta_ASV2028	Salisaeta_ASV2028	Presence	Absence
116	Unclassified_Rhodothermaceae_7_ASV4479	Unclassified_Rhodothermaceae_7_ASV4479	Presence	Absence
117	Unclassified_PAUC34f_ASV1609	Unclassified_PAUC34f_ASV1609	Presence	Absence
118	Unclassified_Latescibacterota_2_ASV3737	Unclassified_Latescibacterota_2_ASV3737	Presence	Absence
119	Unclassified_WCHB1-41_1_ASV4912	Unclassified_WCHB1-41_1_ASV4912	Presence	Absence
120	Unclassified_Latescibacterota_11_ASV3735	Unclassified_Latescibacterota_11_ASV3735	Presence	Absence
121	Spirochaeta_ASV2148	Spirochaeta_ASV2148	Presence	Absence
122	Spirochaeta_2_ASV2204	Spirochaeta_2_ASV2204	Presence	Absence
123	Spirochaeta_ASV2149	Spirochaeta_ASV2149	Presence	Absence
124	Spirochaeta_2_ASV2175	Spirochaeta_2_ASV2175	Presence	Absence
125	Sediminispirochaeta_ASV2060	Sediminispirochaeta_ASV2060	Presence	Absence
126	Unclassified_Simkaniaceae_3_ASV4727	Unclassified_Simkaniaceae_3_ASV4727	Presence	Absence
127	Unclassified_Simkaniaceae_1_ASV4725	Unclassified_Simkaniaceae_1_ASV4725	Presence	Absence
128	Neochlamydia_ASV1472	Neochlamydia_ASV1472	Presence	Absence
129	Candidatus_Protochlamydia_ASV464	Candidatus_Protochlamydia_ASV464	Presence	Absence
130	Unclassified_Parachlamydiaceae_4_ASV4025	Unclassified_Parachlamydiaceae_4_ASV4025	Presence	Absence
131	Unclassified_Planctomycetota_9_ASV4220	Unclassified_Planctomycetota_9_ASV4220	Presence	Absence
132	Unclassified_SG8-4_2_ASV4716	Unclassified_SG8-4_2_ASV4716	Presence	Absence
133	Unclassified_SG8-4_6_ASV4720	Unclassified_SG8-4_6_ASV4720	Presence	Absence
134	Unclassified_SG8-4_4_ASV4718	Unclassified_SG8-4_4_ASV4718	Presence	Absence
135	Unclassified_4572-13_2_ASV2427	Unclassified_4572-13_2_ASV2427	Presence	Absence
136	CL500-3_ASV561	CL500-3_ASV561	Presence	Absence
137	SM1A02_ASV2098	SM1A02_ASV2098	Presence	Absence
138	SM1A02_ASV2094	SM1A02_ASV2094	Presence	Absence
139	SM1A02_ASV2096	SM1A02_ASV2096	Presence	Absence
140	Unclassified_WD2101_soil_group_2_ASV4923	Unclassified_WD2101_soil_group_2_ASV4923	Presence	Absence
141	Unclassified_mle1-8_5_ASV3891	Unclassified_mle1-8_5_ASV3891	Presence	Absence
142	Unclassified_Gemmataceae_8_ASV3569	Unclassified_Gemmataceae_8_ASV3569	Presence	Absence
143	Unclassified_Isosphaeraceae_9_ASV3651	Unclassified_Isosphaeraceae_9_ASV3651	Presence	Absence
144	Unclassified_Isosphaeraceae_1_ASV3643	Unclassified_Isosphaeraceae_1_ASV3643	Presence	Absence
145	Fimbriiglobus_ASV929	Fimbriiglobus_ASV929	Presence	Absence
146	Fimbriiglobus_ASV924	Fimbriiglobus_ASV924	Presence	Absence
147	Fimbriiglobus_ASV927	Fimbriiglobus_ASV927	Presence	Absence
148	Fimbriiglobus_ASV926	Fimbriiglobus_ASV926	Presence	Absence
149	Unclassified_Planctomycetales_6_ASV4198	Unclassified_Planctomycetales_6_ASV4198	Presence	Absence
150	SH-PL14_ASV2081	SH-PL14_ASV2081	Presence	Absence
151	Planctopirus_ASV1698	Planctopirus_ASV1698	Presence	Absence
152	Unclassified_Gimesiaceae_3_ASV3587	Unclassified_Gimesiaceae_3_ASV3587	Presence	Absence
153	Pir4_lineage_ASV1680	Pir4_lineage_ASV1680	Presence	Absence
154	Unclassified_Pirellulaceae_5_ASV4148	Unclassified_Pirellulaceae_5_ASV4148	Presence	Absence
155	Blastopirellula_ASV337	Blastopirellula_ASV337	Presence	Absence
156	Blastopirellula_ASV340	Blastopirellula_ASV340	Presence	Absence
157	Pirellula_ASV1688	Pirellula_ASV1688	Presence	Absence
158	Pirellula_ASV1685	Pirellula_ASV1685	Presence	Absence
159	Pirellula_ASV1689	Pirellula_ASV1689	Presence	Absence
160	Pirellula_ASV1687	Pirellula_ASV1687	Presence	Absence
161	Pirellula_ASV1695	Pirellula_ASV1695	Presence	Absence
162	Pirellula_ASV1691	Pirellula_ASV1691	Presence	Absence
163	Rhodopirellula_ASV1861	Rhodopirellula_ASV1861	Presence	Absence
164	Pirellula_ASV1692	Pirellula_ASV1692	Presence	Absence
165	Unclassified_Pirellulaceae_3_ASV4146	Unclassified_Pirellulaceae_3_ASV4146	Presence	Absence
166	Unclassified_Pirellulaceae_6_ASV4149	Unclassified_Pirellulaceae_6_ASV4149	Presence	Absence
167	Unclassified_Pirellulaceae_12_ASV4128	Unclassified_Pirellulaceae_12_ASV4128	Presence	Absence
168	Unclassified_Pirellulaceae_7_ASV4150	Unclassified_Pirellulaceae_7_ASV4150	Presence	Absence
169	Unclassified_Pirellulaceae_22_ASV4139	Unclassified_Pirellulaceae_22_ASV4139	Presence	Absence
170	Unclassified_Pirellulaceae_16_ASV4132	Unclassified_Pirellulaceae_16_ASV4132	Presence	Absence
171	Unclassified_Pirellulaceae_27_ASV4144	Unclassified_Pirellulaceae_27_ASV4144	Presence	Absence
172	Unclassified_Pirellulaceae_10_ASV4126	Unclassified_Pirellulaceae_10_ASV4126	Presence	Absence
173	Unclassified_Pirellulaceae_11_ASV4127	Unclassified_Pirellulaceae_11_ASV4127	Presence	Absence
174	Rhodopirellula_ASV1859	Rhodopirellula_ASV1859	Presence	Absence
175	Unclassified_OM190_2_ASV4007	Unclassified_OM190_2_ASV4007	Presence	Absence
176	Unclassified_Acidobacteriota_1_ASV2485	Unclassified_Acidobacteriota_1_ASV2485	Presence	Absence
177	Unclassified_Vicinamibacteraceae_6_ASV4902	Unclassified_Vicinamibacteraceae_6_ASV4902	Presence	Absence
178	Unclassified_Vicinamibacteraceae_1_ASV4897	Unclassified_Vicinamibacteraceae_1_ASV4897	Presence	Absence
179	Unclassified_Vicinamibacterales_3_ASV4906	Unclassified_Vicinamibacterales_3_ASV4906	Presence	Absence
180	Unclassified_Vicinamibacterales_5_ASV4908	Unclassified_Vicinamibacterales_5_ASV4908	Presence	Absence
181	Unclassified_Vicinamibacteraceae_7_ASV4903	Unclassified_Vicinamibacteraceae_7_ASV4903	Presence	Absence
182	Coraliomargarita_ASV645	Coraliomargarita_ASV645	Presence	Absence
183	Opitutus_ASV1550	Opitutus_ASV1550	Presence	Absence
184	Unclassified_Latescibacteraceae_7_ASV3730	Unclassified_Latescibacteraceae_7_ASV3730	Presence	Absence
185	Unclassified_Methylacidiphilaceae_5_ASV3831	Unclassified_Methylacidiphilaceae_5_ASV3831	Presence	Absence
186	SH3-11_ASV2077	SH3-11_ASV2077	Presence	Absence
187	Unclassified_Verrucomicrobiaceae_2_ASV4895	Unclassified_Verrucomicrobiaceae_2_ASV4895	Presence	Absence
188	Luteolibacter_ASV1287	Luteolibacter_ASV1287	Presence	Absence
189	Luteolibacter_ASV1282	Luteolibacter_ASV1282	Presence	Absence
190	Luteolibacter_ASV1283	Luteolibacter_ASV1283	Presence	Absence
191	Luteolibacter_ASV1288	Luteolibacter_ASV1288	Presence	Absence
192	Luteolibacter_ASV1291	Luteolibacter_ASV1291	Presence	Absence
193	Unclassified_Rubritaleaceae_2_ASV4488	Unclassified_Rubritaleaceae_2_ASV4488	Presence	Absence
194	Rubritalea_ASV1942	Rubritalea_ASV1942	Presence	Absence
195	Prosthecobacter_ASV1727	Prosthecobacter_ASV1727	Presence	Absence
196	FukuN18_freshwater_group_ASV968	FukuN18_freshwater_group_ASV968	Presence	Absence
197	Terrimicrobium_ASV2340	Terrimicrobium_ASV2340	Presence	Absence
198	LD29_ASV1197	LD29_ASV1197	Presence	Absence
199	LD29_ASV1196	LD29_ASV1196	Presence	Absence
200	LD29_ASV1202	LD29_ASV1202	Presence	Absence
201	LD29_ASV1199	LD29_ASV1199	Presence	Absence
202	LD29_ASV1201	LD29_ASV1201	Presence	Absence
203	LD29_ASV1198	LD29_ASV1198	Presence	Absence
204	Chthoniobacter_ASV555	Chthoniobacter_ASV555	Presence	Absence
205	Unclassified_Terrimicrobiaceae_1_ASV4848	Unclassified_Terrimicrobiaceae_1_ASV4848	Presence	Absence
206	Unclassified_Chthoniobacterales_3_ASV3074	Unclassified_Chthoniobacterales_3_ASV3074	Presence	Absence
207	Unclassified_Chthoniobacterales_1_ASV3072	Unclassified_Chthoniobacterales_1_ASV3072	Presence	Absence
208	Terrimicrobium_ASV2334	Terrimicrobium_ASV2334	Presence	Absence
209	Terrimicrobium_ASV2337	Terrimicrobium_ASV2337	Presence	Absence
210	Terrimicrobium_ASV2335	Terrimicrobium_ASV2335	Presence	Absence
211	Candidatus_Udaeobacter_ASV486	Candidatus_Udaeobacter_ASV486	Presence	Absence
212	Unclassified_Pirellulaceae_1_ASV4125	Unclassified_Pirellulaceae_1_ASV4125	Presence	Absence
213	Unclassified_vadinHA49_6_ASV4883	Unclassified_vadinHA49_6_ASV4883	Presence	Absence
214	Unclassified_Thermodesulfovibrionia_2_ASV4856	Unclassified_Thermodesulfovibrionia_2_ASV4856	Presence	Absence
215	Unclassified_Blastocatellaceae_3_ASV2914	Unclassified_Blastocatellaceae_3_ASV2914	Presence	Absence
216	Unclassified_AKYG1722_ASV107	Unclassified_AKYG1722_ASV107	Presence	Absence
217	FFCH7168_ASV919	FFCH7168_ASV919	Presence	Absence
218	Unclassified_Chloroflexaceae_1_ASV3044	Unclassified_Chloroflexaceae_1_ASV3044	Presence	Absence
219	Candidatus_Chlorothrix_ASV428	Candidatus_Chlorothrix_ASV428	Presence	Absence
220	Unclassified_Chloroflexaceae_2_ASV3045	Unclassified_Chloroflexaceae_2_ASV3045	Presence	Absence
221	Candidatus_Chloroploca_ASV418	Candidatus_Chloroploca_ASV418	Presence	Absence
222	Candidatus_Chloroploca_ASV419	Candidatus_Chloroploca_ASV419	Presence	Absence
223	Unclassified_SBR1031_72_ASV4695	Unclassified_SBR1031_72_ASV4695	Presence	Absence
224	Unclassified_SBR1031_9_ASV4711	Unclassified_SBR1031_9_ASV4711	Presence	Absence
225	Unclassified_A4b_31_ASV2454	Unclassified_A4b_31_ASV2454	Presence	Absence
226	Unclassified_Caldilineaceae_2_ASV2964	Unclassified_Caldilineaceae_2_ASV2964	Presence	Absence
227	Unclassified_Anaerolineaceae_7_ASV2620	Unclassified_Anaerolineaceae_7_ASV2620	Presence	Absence
228	Unclassified_SBR1031_40_ASV4660	Unclassified_SBR1031_40_ASV4660	Presence	Absence
229	Unclassified_SBR1031_47_ASV4667	Unclassified_SBR1031_47_ASV4667	Presence	Absence
230	Unclassified_SBR1031_18_ASV4635	Unclassified_SBR1031_18_ASV4635	Presence	Absence
231	Flexilinea_ASV955	Flexilinea_ASV955	Presence	Absence
232	Unclassified_Ardenticatenales_17_ASV2641	Unclassified_Ardenticatenales_17_ASV2641	Presence	Absence
233	Unclassified_Anaerolineaceae_2_ASV2596	Unclassified_Anaerolineaceae_2_ASV2596	Presence	Absence
234	Unclassified_Anaerolineaceae_34_ASV2612	Unclassified_Anaerolineaceae_34_ASV2612	Presence	Absence
235	Unclassified_SAR202_clade_2_ASV4584	Unclassified_SAR202_clade_2_ASV4584	Presence	Absence
236	Unclassified_Dehalococcoidia_1_ASV3226	Unclassified_Dehalococcoidia_1_ASV3226	Presence	Absence
237	Unclassified_C0119_1_ASV2961	Unclassified_C0119_1_ASV2961	Presence	Absence
238	Bryobacter_ASV381	Bryobacter_ASV381	Presence	Absence
239	Unclassified_AKIW659_ASV105	Unclassified_AKIW659_ASV105	Presence	Absence
240	Unclassified_Microtrichales_3_ASV3879	Unclassified_Microtrichales_3_ASV3879	Presence	Absence
241	Unclassified_Microtrichales_4_ASV3880	Unclassified_Microtrichales_4_ASV3880	Presence	Absence
242	Unclassified_IMCC26256_1_ASV3640	Unclassified_IMCC26256_1_ASV3640	Presence	Absence
243	Unclassified_Microtrichaceae_2_ASV3875	Unclassified_Microtrichaceae_2_ASV3875	Presence	Absence
244	Sva0996_marine_group_ASV2300	Sva0996_marine_group_ASV2300	Presence	Absence
245	Unclassified_Actinomarinales_2_ASV2505	Unclassified_Actinomarinales_2_ASV2505	Presence	Absence
246	Unclassified_Actinomarinales_4_ASV2507	Unclassified_Actinomarinales_4_ASV2507	Presence	Absence
247	Unclassified_Nocardioidaceae_2_ASV3978	Unclassified_Nocardioidaceae_2_ASV3978	Presence	Absence
248	Aeromicrobium_ASV99	Aeromicrobium_ASV99	Presence	Absence
249	Nocardioides_ASV1497	Nocardioides_ASV1497	Presence	Absence
250	Nocardioides_ASV1500	Nocardioides_ASV1500	Presence	Absence
251	Nocardia_ASV1496	Nocardia_ASV1496	Presence	Absence
252	Unclassified_PeM15_1_ASV4083	Unclassified_PeM15_1_ASV4083	Presence	Absence
253	Unclassified_PeM15_2_ASV4085	Unclassified_PeM15_2_ASV4085	Presence	Absence
254	Unclassified_PeM15_5_ASV4088	Unclassified_PeM15_5_ASV4088	Presence	Absence
255	Unclassified_PeM15_10_ASV4084	Unclassified_PeM15_10_ASV4084	Presence	Absence
256	Unclassified_PeM15_8_ASV4091	Unclassified_PeM15_8_ASV4091	Presence	Absence
257	Unclassified_Actinobacteria_3_ASV2495	Unclassified_Actinobacteria_3_ASV2495	Presence	Absence
258	Unclassified_PeM15_4_ASV4087	Unclassified_PeM15_4_ASV4087	Presence	Absence
259	Unclassified_PeM15_7_ASV4090	Unclassified_PeM15_7_ASV4090	Presence	Absence
260	Unclassified_PeM15_3_ASV4086	Unclassified_PeM15_3_ASV4086	Presence	Absence
261	Unclassified_PeM15_9_ASV4092	Unclassified_PeM15_9_ASV4092	Presence	Absence
262	Unclassified_Actinobacteria_2_ASV2494	Unclassified_Actinobacteria_2_ASV2494	Presence	Absence
263	Unclassified_Pseudonocardiaceae_5_ASV4262	Unclassified_Pseudonocardiaceae_5_ASV4262	Presence	Absence
264	Unclassified_Pseudonocardiaceae_1_ASV4258	Unclassified_Pseudonocardiaceae_1_ASV4258	Presence	Absence
265	Saccharopolyspora_ASV1959	Saccharopolyspora_ASV1959	Presence	Absence
266	Nocardia_ASV1495	Nocardia_ASV1495	Presence	Absence
267	Rhodococcus_ASV1834	Rhodococcus_ASV1834	Presence	Absence
268	Dietzia_ASV842	Dietzia_ASV842	Presence	Absence
269	Gordonia_ASV1025	Gordonia_ASV1025	Presence	Absence
270	Corynebacterium_ASV657	Corynebacterium_ASV657	Presence	Absence
271	Corynebacterium_ASV646	Corynebacterium_ASV646	Presence	Absence
272	Corynebacterium_ASV665	Corynebacterium_ASV665	Presence	Absence
273	Corynebacterium_ASV671	Corynebacterium_ASV671	Presence	Absence
274	Corynebacterium_ASV651	Corynebacterium_ASV651	Presence	Absence
275	Corynebacterium_ASV647	Corynebacterium_ASV647	Presence	Absence
276	Corynebacterium_ASV675	Corynebacterium_ASV675	Presence	Absence
277	Corynebacterium_ASV678	Corynebacterium_ASV678	Presence	Absence
278	Mycobacterium_ASV1417	Mycobacterium_ASV1417	Presence	Absence
279	Mycobacterium_ASV1423	Mycobacterium_ASV1423	Presence	Absence
280	Mycobacterium_ASV1427	Mycobacterium_ASV1427	Presence	Absence
281	Blastococcus_ASV334	Blastococcus_ASV334	Presence	Absence
282	Leucobacter_ASV1247	Leucobacter_ASV1247	Presence	Absence
283	Unclassified_Microbacteriaceae_10_ASV3844	Unclassified_Microbacteriaceae_10_ASV3844	Presence	Absence
284	Demequina_ASV734	Demequina_ASV734	Presence	Absence
285	Demequina_ASV733	Demequina_ASV733	Presence	Absence
286	Aurantimicrobium_ASV234	Aurantimicrobium_ASV234	Presence	Absence
287	Candidatus_Limnoluna_ASV439	Candidatus_Limnoluna_ASV439	Presence	Absence
288	Unclassified_Microbacteriaceae_1_ASV3843	Unclassified_Microbacteriaceae_1_ASV3843	Presence	Absence
289	Unclassified_Micrococcales_4_ASV3864	Unclassified_Micrococcales_4_ASV3864	Presence	Absence
290	Unclassified_Cellulomonadaceae_1_ASV3005	Unclassified_Cellulomonadaceae_1_ASV3005	Presence	Absence
291	Unclassified_Microbacteriaceae_12_ASV3846	Unclassified_Microbacteriaceae_12_ASV3846	Presence	Absence
292	Unclassified_Micrococcales_3_ASV3863	Unclassified_Micrococcales_3_ASV3863	Presence	Absence
293	Flaviflexus_ASV931	Flaviflexus_ASV931	Presence	Absence
294	Unclassified_Micrococcales_5_ASV3865	Unclassified_Micrococcales_5_ASV3865	Presence	Absence
295	Brachybacterium_ASV350	Brachybacterium_ASV350	Presence	Absence
296	Bifidobacterium_ASV318	Bifidobacterium_ASV318	Presence	Absence
297	Bifidobacterium_ASV317	Bifidobacterium_ASV317	Presence	Absence
298	Brevibacterium_ASV360	Brevibacterium_ASV360	Presence	Absence
299	Saccharomonospora_ASV1958	Saccharomonospora_ASV1958	Presence	Absence
300	Actinomyces_ASV77	Actinomyces_ASV77	Presence	Absence
301	Actinomyces_ASV84	Actinomyces_ASV84	Presence	Absence
302	Unclassidied_67-14_4_ASV2414	Unclassidied_67-14_4_ASV2414	Presence	Absence
303	Unclassidied_67-14_1_ASV2411	Unclassidied_67-14_1_ASV2411	Presence	Absence
304	Unclassified_Solirubrobacterales_1_ASV4741	Unclassified_Solirubrobacterales_1_ASV4741	Presence	Absence
305	Unclassified_Solirubrobacteraceae_1_ASV4740	Unclassified_Solirubrobacteraceae_1_ASV4740	Presence	Absence
306	Rubrobacter_ASV1949	Rubrobacter_ASV1949	Presence	Absence
307	Unclassified_Gaiellales_1_ASV3461	Unclassified_Gaiellales_1_ASV3461	Presence	Absence
308	Unclassified_BD2-11_terrestrial_group_25_ASV2856	Unclassified_BD2-11_terrestrial_group_25_ASV2856	Presence	Absence
309	Unclassified_BD2-11_terrestrial_group_30_ASV2862	Unclassified_BD2-11_terrestrial_group_30_ASV2862	Presence	Absence
310	Unclassified_PAUC43f_marine_benthic_group_3_ASV4064	Unclassified_PAUC43f_marine_benthic_group_3_ASV4064	Presence	Absence
311	Unclassified_Rokubacteriales_ASV1892	Unclassified_Rokubacteriales_ASV1892	Presence	Absence
312	Unclassified_Gemmatimonadaceae_2_ASV3574	Unclassified_Gemmatimonadaceae_2_ASV3574	Presence	Absence
313	Unclassified_Latescibacterota_6_ASV3741	Unclassified_Latescibacterota_6_ASV3741	Presence	Absence
314	Calorithrix_ASV396	Calorithrix_ASV396	Presence	Absence
315	Caldithrix_ASV389	Caldithrix_ASV389	Presence	Absence
316	Unclassified_Calditrichaceae_3_ASV2970	Unclassified_Calditrichaceae_3_ASV2970	Presence	Absence
317	Unclassified_Desulfobacterota_6_ASV3246	Unclassified_Desulfobacterota_6_ASV3246	Presence	Absence
318	Unclassified_Rs-K70_termite_group_2_ASV1925	Unclassified_Rs-K70_termite_group_2_ASV1925	Presence	Absence
319	Desulfocapsa_ASV775	Desulfocapsa_ASV775	Presence	Absence
320	Desulfatiglans_ASV759	Desulfatiglans_ASV759	Presence	Absence
321	Desulfatiglans_ASV747	Desulfatiglans_ASV747	Presence	Absence
322	Desulfatiglans_ASV754	Desulfatiglans_ASV754	Presence	Absence
323	P3OB-42_ASV1569	P3OB-42_ASV1569	Presence	Absence
324	Unclassified_Syntrophobacteraceae_2_ASV4839	Unclassified_Syntrophobacteraceae_2_ASV4839	Presence	Absence
325	Syntrophobacter_ASV2315	Syntrophobacter_ASV2315	Presence	Absence
326	Unclassified_Sandaracinaceae_5_ASV4521	Unclassified_Sandaracinaceae_5_ASV4521	Presence	Absence
327	Unclassified_NB1-j_15_ASV3929	Unclassified_NB1-j_15_ASV3929	Presence	Absence
328	Unclassified_NB1-j_8_ASV3943	Unclassified_NB1-j_8_ASV3943	Presence	Absence
329	Desulfomonile_ASV786	Desulfomonile_ASV786	Presence	Absence
330	Desulfomonile_ASV788	Desulfomonile_ASV788	Presence	Absence
331	Unclassified_Alphaproteobacteria_5_ASV2573	Unclassified_Alphaproteobacteria_5_ASV2573	Presence	Absence
332	Unclassified_Hyphomonadaceae_1_ASV3627	Unclassified_Hyphomonadaceae_1_ASV3627	Presence	Absence
333	Unclassified_Hyphomonadaceae_5_ASV3633	Unclassified_Hyphomonadaceae_5_ASV3633	Presence	Absence
334	Amphiplicatus_ASV173	Amphiplicatus_ASV173	Presence	Absence
335	Unclassified_Rickettsiales_1_ASV4482	Unclassified_Rickettsiales_1_ASV4482	Presence	Absence
336	Wolbachia_ASV5103	Wolbachia_ASV5103	Presence	Absence
337	Unclassified_Rhodobacteraceae_62_ASV4406	Unclassified_Rhodobacteraceae_62_ASV4406	Presence	Absence
338	Unclassified_Rhodobacteraceae_93_ASV4440	Unclassified_Rhodobacteraceae_93_ASV4440	Presence	Absence
339	Candidatus_Alysiosphaera_ASV408	Candidatus_Alysiosphaera_ASV408	Presence	Absence
340	Unclassified_SM2D12_2_ASV4736	Unclassified_SM2D12_2_ASV4736	Presence	Absence
341	Unclassified_Magnetospiraceae_1_ASV3789	Unclassified_Magnetospiraceae_1_ASV3789	Presence	Absence
342	Allorhizobium-Neorhizobium-Pararhizobium-Rhizobium_ASV146	Allorhizobium-Neorhizobium-Pararhizobium-Rhizobium_ASV146	Presence	Absence
343	Unclassified_Rhodobacteraceae_97_ASV4444	Unclassified_Rhodobacteraceae_97_ASV4444	Presence	Absence
344	Allorhizobium-Neorhizobium-Pararhizobium-Rhizobium_ASV160	Allorhizobium-Neorhizobium-Pararhizobium-Rhizobium_ASV160	Presence	Absence
345	Allorhizobium-Neorhizobium-Pararhizobium-Rhizobium_ASV158	Allorhizobium-Neorhizobium-Pararhizobium-Rhizobium_ASV158	Presence	Absence
346	Aureimonas_ASV237	Aureimonas_ASV237	Presence	Absence
347	Aureimonas_ASV244	Aureimonas_ASV244	Presence	Absence
348	Allorhizobium-Neorhizobium-Pararhizobium-Rhizobium_ASV150	Allorhizobium-Neorhizobium-Pararhizobium-Rhizobium_ASV150	Presence	Absence
349	Aureimonas_ASV241	Aureimonas_ASV241	Presence	Absence
350	Allorhizobium-Neorhizobium-Pararhizobium-Rhizobium_ASV145	Allorhizobium-Neorhizobium-Pararhizobium-Rhizobium_ASV145	Presence	Absence
351	Allorhizobium-Neorhizobium-Pararhizobium-Rhizobium_ASV152	Allorhizobium-Neorhizobium-Pararhizobium-Rhizobium_ASV152	Presence	Absence
352	Bartonella_ASV278	Bartonella_ASV278	Presence	Absence
353	Unclassified_Rhizobiaceae_17_ASV4301	Unclassified_Rhizobiaceae_17_ASV4301	Presence	Absence
354	Unclassified_Rhodobacteraceae_52_ASV4395	Unclassified_Rhodobacteraceae_52_ASV4395	Presence	Absence
355	Unclassified_Rhodobacteraceae_46_ASV4388	Unclassified_Rhodobacteraceae_46_ASV4388	Presence	Absence
356	Methyloceanibacter_ASV1376	Methyloceanibacter_ASV1376	Presence	Absence
357	Unclassified_Rhizobiaceae_2_ASV4304	Unclassified_Rhizobiaceae_2_ASV4304	Presence	Absence
358	Unclassified_Rhizobiales_6_ASV4328	Unclassified_Rhizobiales_6_ASV4328	Presence	Absence
359	Phenylobacterium_ASV1654	Phenylobacterium_ASV1654	Presence	Absence
360	Brevundimonas_ASV371	Brevundimonas_ASV371	Presence	Absence
361	Brevundimonas_ASV369	Brevundimonas_ASV369	Presence	Absence
362	Phenylobacterium_ASV1652	Phenylobacterium_ASV1652	Presence	Absence
363	Methylobacterium-Methylorubrum_ASV1372	Methylobacterium-Methylorubrum_ASV1372	Presence	Absence
364	Bosea_ASV347	Bosea_ASV347	Presence	Absence
365	Salinarimonas_ASV1968	Salinarimonas_ASV1968	Presence	Absence
366	Salinarimonas_ASV1967	Salinarimonas_ASV1967	Presence	Absence
367	Unclassified_Beijerinckiaceae_22_ASV2891	Unclassified_Beijerinckiaceae_22_ASV2891	Presence	Absence
368	Unclassified_Beijerinckiaceae_14_ASV2882	Unclassified_Beijerinckiaceae_14_ASV2882	Presence	Absence
369	Unclassified_Beijerinckiaceae_2_ASV2888	Unclassified_Beijerinckiaceae_2_ASV2888	Presence	Absence
370	Unclassified_Beijerinckiaceae_11_ASV2879	Unclassified_Beijerinckiaceae_11_ASV2879	Presence	Absence
371	Unclassified_Beijerinckiaceae_15_ASV2883	Unclassified_Beijerinckiaceae_15_ASV2883	Presence	Absence
372	Unclassified_Beijerinckiaceae_5_ASV2898	Unclassified_Beijerinckiaceae_5_ASV2898	Presence	Absence
373	Unclassified_Beijerinckiaceae_3_ASV2896	Unclassified_Beijerinckiaceae_3_ASV2896	Presence	Absence
374	Unclassified_Alphaproteobacteria_13_ASV2545	Unclassified_Alphaproteobacteria_13_ASV2545	Presence	Absence
375	Phreatobacter_ASV1669	Phreatobacter_ASV1669	Presence	Absence
376	Phreatobacter_ASV1670	Phreatobacter_ASV1670	Presence	Absence
377	Phreatobacter_ASV1671	Phreatobacter_ASV1671	Presence	Absence
378	Phreatobacter_ASV1673	Phreatobacter_ASV1673	Presence	Absence
379	Phreatobacter_ASV1672	Phreatobacter_ASV1672	Presence	Absence
380	Xanthobacter_ASV5107	Xanthobacter_ASV5107	Presence	Absence
381	Unclassified_Xanthobacteraceae_3_ASV4955	Unclassified_Xanthobacteraceae_3_ASV4955	Presence	Absence
382	Unclassified_Rhizobiales_5_ASV4327	Unclassified_Rhizobiales_5_ASV4327	Presence	Absence
383	Unclassified_Pleomorphomonadaceae_1_ASV4224	Unclassified_Pleomorphomonadaceae_1_ASV4224	Presence	Absence
384	Unclassified_Xanthobacteraceae_2_ASV4954	Unclassified_Xanthobacteraceae_2_ASV4954	Presence	Absence
385	Rhodopseudomonas_ASV1867	Rhodopseudomonas_ASV1867	Presence	Absence
386	Rhodopseudomonas_ASV1864	Rhodopseudomonas_ASV1864	Presence	Absence
387	Rhodopseudomonas_ASV1868	Rhodopseudomonas_ASV1868	Presence	Absence
388	Unclassified_Xanthobacteraceae_4_ASV4956	Unclassified_Xanthobacteraceae_4_ASV4956	Presence	Absence
389	Unclassified_Xanthobacteraceae_5_ASV4957	Unclassified_Xanthobacteraceae_5_ASV4957	Presence	Absence
390	Unclassified_Xanthobacteraceae_11_ASV4952	Unclassified_Xanthobacteraceae_11_ASV4952	Presence	Absence
391	Unclassified_Xanthobacteraceae_9_ASV4961	Unclassified_Xanthobacteraceae_9_ASV4961	Presence	Absence
392	Unclassified_Xanthobacteraceae_8_ASV4960	Unclassified_Xanthobacteraceae_8_ASV4960	Presence	Absence
393	Rhodoplanes_ASV1863	Rhodoplanes_ASV1863	Presence	Absence
394	Unclassified_Xanthobacteraceae_7_ASV4959	Unclassified_Xanthobacteraceae_7_ASV4959	Presence	Absence
395	Unclassified_Pleomorphomonadaceae_3_ASV4226	Unclassified_Pleomorphomonadaceae_3_ASV4226	Presence	Absence
396	Unclassified_Pleomorphomonadaceae_2_ASV4225	Unclassified_Pleomorphomonadaceae_2_ASV4225	Presence	Absence
397	Unclassified_Pleomorphomonadaceae_4_ASV4227	Unclassified_Pleomorphomonadaceae_4_ASV4227	Presence	Absence
398	Rhodomicrobium_ASV1843	Rhodomicrobium_ASV1843	Presence	Absence
399	Blastochloris_ASV328	Blastochloris_ASV328	Presence	Absence
400	Blastochloris_ASV329	Blastochloris_ASV329	Presence	Absence
401	Blastochloris_ASV325	Blastochloris_ASV325	Presence	Absence
402	Devosia_ASV824	Devosia_ASV824	Presence	Absence
403	Rhodoblastus_ASV1828	Rhodoblastus_ASV1828	Presence	Absence
404	Devosia_ASV838	Devosia_ASV838	Presence	Absence
405	Devosia_ASV830	Devosia_ASV830	Presence	Absence
406	Unclassified_Rhizobiales_Incertae_Sedis_1_ASV4332	Unclassified_Rhizobiales_Incertae_Sedis_1_ASV4332	Presence	Absence
407	Unclassified_Devosiaceae_1_ASV3300	Unclassified_Devosiaceae_1_ASV3300	Presence	Absence
408	Unclassified_Rhizobiales_Incertae_Sedis_2_ASV4333	Unclassified_Rhizobiales_Incertae_Sedis_2_ASV4333	Presence	Absence
409	Unclassified_Rhizobiales_Incertae_Sedis_7_ASV4338	Unclassified_Rhizobiales_Incertae_Sedis_7_ASV4338	Presence	Absence
410	Mesorhizobium_ASV1355	Mesorhizobium_ASV1355	Presence	Absence
411	Unclassified_Rhizobiales_Incertae_Sedis_8_ASV4339	Unclassified_Rhizobiales_Incertae_Sedis_8_ASV4339	Presence	Absence
412	Unclassified_Rhizobiales_Incertae_Sedis_3_ASV4334	Unclassified_Rhizobiales_Incertae_Sedis_3_ASV4334	Presence	Absence
413	Unclassified_Rhizobiales_Incertae_Sedis_6_ASV4337	Unclassified_Rhizobiales_Incertae_Sedis_6_ASV4337	Presence	Absence
414	Hyphomicrobium_ASV1116	Hyphomicrobium_ASV1116	Presence	Absence
415	Hyphomicrobium_ASV1114	Hyphomicrobium_ASV1114	Presence	Absence
416	Hyphomicrobium_ASV1112	Hyphomicrobium_ASV1112	Presence	Absence
417	Kaistia_ASV1134	Kaistia_ASV1134	Presence	Absence
418	Methylocystis_ASV1378	Methylocystis_ASV1378	Presence	Absence
419	Unclassified_Beijerinckiaceae_26_ASV2895	Unclassified_Beijerinckiaceae_26_ASV2895	Presence	Absence
420	alphaI_cluster_ASV162	alphaI_cluster_ASV162	Presence	Absence
421	alphaI_cluster_ASV161	alphaI_cluster_ASV161	Presence	Absence
422	Unclassified_Beijerinckiaceae_18_ASV2886	Unclassified_Beijerinckiaceae_18_ASV2886	Presence	Absence
423	Unclassified_Beijerinckiaceae_4_ASV2897	Unclassified_Beijerinckiaceae_4_ASV2897	Presence	Absence
424	Unclassified_Beijerinckiaceae_8_ASV2901	Unclassified_Beijerinckiaceae_8_ASV2901	Presence	Absence
425	alphaI_cluster_ASV163	alphaI_cluster_ASV163	Presence	Absence
426	Unclassified_Rhizobiales_4_ASV4326	Unclassified_Rhizobiales_4_ASV4326	Presence	Absence
427	Unclassified_Beijerinckiaceae_12_ASV2880	Unclassified_Beijerinckiaceae_12_ASV2880	Presence	Absence
428	Unclassified_Beijerinckiaceae_6_ASV2899	Unclassified_Beijerinckiaceae_6_ASV2899	Presence	Absence
429	Unclassified_Rhodobacteraceae_24_ASV4364	Unclassified_Rhodobacteraceae_24_ASV4364	Presence	Absence
430	Hyphomicrobium_ASV1113	Hyphomicrobium_ASV1113	Presence	Absence
431	Hyphomicrobium_ASV1111	Hyphomicrobium_ASV1111	Presence	Absence
432	Unclassified_Rhizobiales_2_ASV4324	Unclassified_Rhizobiales_2_ASV4324	Presence	Absence
433	Chthonobacter_ASV556	Chthonobacter_ASV556	Presence	Absence
434	Pleomorphomonas_ASV1702	Pleomorphomonas_ASV1702	Presence	Absence
435	Pleomorphomonas_ASV1701	Pleomorphomonas_ASV1701	Presence	Absence
436	Paracoccus_ASV1599	Paracoccus_ASV1599	Presence	Absence
437	Unclassified_Rhodobacteraceae_20_ASV4360	Unclassified_Rhodobacteraceae_20_ASV4360	Presence	Absence
438	HIMB11_ASV1090	HIMB11_ASV1090	Presence	Absence
439	Roseovarius_ASV1919	Roseovarius_ASV1919	Presence	Absence
440	Unclassified_Rhodobacteraceae_81_ASV4427	Unclassified_Rhodobacteraceae_81_ASV4427	Presence	Absence
441	Unclassified_Rhodobacteraceae_45_ASV4387	Unclassified_Rhodobacteraceae_45_ASV4387	Presence	Absence
442	Unclassified_Rhodobacteraceae_38_ASV4379	Unclassified_Rhodobacteraceae_38_ASV4379	Presence	Absence
443	Unclassified_Rhodobacteraceae_73_ASV4418	Unclassified_Rhodobacteraceae_73_ASV4418	Presence	Absence
444	Unclassified_Rhodobacteraceae_79_ASV4424	Unclassified_Rhodobacteraceae_79_ASV4424	Presence	Absence
445	Unclassified_Rhodobacteraceae_39_ASV4380	Unclassified_Rhodobacteraceae_39_ASV4380	Presence	Absence
446	Rubellimicrobium_ASV1930	Rubellimicrobium_ASV1930	Presence	Absence
447	Rubellimicrobium_ASV1931	Rubellimicrobium_ASV1931	Presence	Absence
448	Unclassified_Rhodobacteraceae_55_ASV4398	Unclassified_Rhodobacteraceae_55_ASV4398	Presence	Absence
449	Unclassified_Rhodobacteraceae_30_ASV4371	Unclassified_Rhodobacteraceae_30_ASV4371	Presence	Absence
450	Unclassified_Rhodobacteraceae_87_ASV4433	Unclassified_Rhodobacteraceae_87_ASV4433	Presence	Absence
451	Unclassified_Rhodobacteraceae_2_ASV4359	Unclassified_Rhodobacteraceae_2_ASV4359	Presence	Absence
452	Unclassified_Rhodobacteraceae_11_ASV4350	Unclassified_Rhodobacteraceae_11_ASV4350	Presence	Absence
453	Unclassified_Rhodobacteraceae_61_ASV4405	Unclassified_Rhodobacteraceae_61_ASV4405	Presence	Absence
454	Unclassified_Rhodobacteraceae_13_ASV4352	Unclassified_Rhodobacteraceae_13_ASV4352	Presence	Absence
455	Unclassified_Rhodobacteraceae_78_ASV4423	Unclassified_Rhodobacteraceae_78_ASV4423	Presence	Absence
456	Unclassified_Rhodobacteraceae_43_ASV4385	Unclassified_Rhodobacteraceae_43_ASV4385	Presence	Absence
457	Unclassified_Rhodobacteraceae_59_ASV4402	Unclassified_Rhodobacteraceae_59_ASV4402	Presence	Absence
458	Unclassified_Rhodobacteraceae_56_ASV4399	Unclassified_Rhodobacteraceae_56_ASV4399	Presence	Absence
459	Unclassified_Rhodobacteraceae_50_ASV4393	Unclassified_Rhodobacteraceae_50_ASV4393	Presence	Absence
460	Unclassified_Rhodobacteraceae_74_ASV4419	Unclassified_Rhodobacteraceae_74_ASV4419	Presence	Absence
461	Unclassified_Rhodobacteraceae_10_ASV4346	Unclassified_Rhodobacteraceae_10_ASV4346	Presence	Absence
462	Unclassified_Rhodobacteraceae_42_ASV4384	Unclassified_Rhodobacteraceae_42_ASV4384	Presence	Absence
463	Unclassified_Rhodobacteraceae_47_ASV4389	Unclassified_Rhodobacteraceae_47_ASV4389	Presence	Absence
464	Unclassified_Rhodobacteraceae_90_ASV4437	Unclassified_Rhodobacteraceae_90_ASV4437	Presence	Absence
465	Unclassified_Rhodobacteraceae_36_ASV4377	Unclassified_Rhodobacteraceae_36_ASV4377	Presence	Absence
466	Unclassified_Rhodobacteraceae_31_ASV4372	Unclassified_Rhodobacteraceae_31_ASV4372	Presence	Absence
467	Unclassified_Rhodobacteraceae_77_ASV4422	Unclassified_Rhodobacteraceae_77_ASV4422	Presence	Absence
468	Unclassified_Rhodobacteraceae_22_ASV4362	Unclassified_Rhodobacteraceae_22_ASV4362	Presence	Absence
469	Unclassified_Rhodobacteraceae_12_ASV4351	Unclassified_Rhodobacteraceae_12_ASV4351	Presence	Absence
470	Unclassified_Rhizobiaceae_9_ASV4321	Unclassified_Rhizobiaceae_9_ASV4321	Presence	Absence
471	Mesorhizobium_ASV1354	Mesorhizobium_ASV1354	Presence	Absence
472	Unclassified_Rhizobiaceae_26_ASV4311	Unclassified_Rhizobiaceae_26_ASV4311	Presence	Absence
473	Mesorhizobium_ASV1353	Mesorhizobium_ASV1353	Presence	Absence
474	Unclassified_Rhodobacteraceae_54_ASV4397	Unclassified_Rhodobacteraceae_54_ASV4397	Presence	Absence
475	Unclassified_Kiloniellaceae_9_ASV3681	Unclassified_Kiloniellaceae_9_ASV3681	Presence	Absence
476	Unclassified_Terasakiellaceae_4_ASV4847	Unclassified_Terasakiellaceae_4_ASV4847	Presence	Absence
477	Roseomonas_ASV1911	Roseomonas_ASV1911	Presence	Absence
478	Roseomonas_ASV1908	Roseomonas_ASV1908	Presence	Absence
479	Roseomonas_ASV1910	Roseomonas_ASV1910	Presence	Absence
480	Unclassified_Acetobacteraceae_2_ASV2467	Unclassified_Acetobacteraceae_2_ASV2467	Presence	Absence
481	Roseomonas_ASV1907	Roseomonas_ASV1907	Presence	Absence
482	Unclassified_Acetobacteraceae_1_ASV2466	Unclassified_Acetobacteraceae_1_ASV2466	Presence	Absence
483	Gluconobacter_ASV1023	Gluconobacter_ASV1023	Presence	Absence
484	Commensalibacter_ASV640	Commensalibacter_ASV640	Presence	Absence
485	Commensalibacter_ASV639	Commensalibacter_ASV639	Presence	Absence
486	Endobacter_ASV862	Endobacter_ASV862	Presence	Absence
487	Rubritepida_ASV1943	Rubritepida_ASV1943	Presence	Absence
488	Rhodovastum_ASV1869	Rhodovastum_ASV1869	Presence	Absence
489	Defluviicoccus_ASV723	Defluviicoccus_ASV723	Presence	Absence
490	Defluviicoccus_ASV724	Defluviicoccus_ASV724	Presence	Absence
491	Unclassified_Alphaproteobacteria_34_ASV2568	Unclassified_Alphaproteobacteria_34_ASV2568	Presence	Absence
492	Pelagibius_ASV1616	Pelagibius_ASV1616	Presence	Absence
493	Pelagibius_ASV1617	Pelagibius_ASV1617	Presence	Absence
494	Unclassified_Rhodospirillales_3_ASV4457	Unclassified_Rhodospirillales_3_ASV4457	Presence	Absence
495	Sandaracinobacter_ASV2030	Sandaracinobacter_ASV2030	Presence	Absence
496	Sphingobium_ASV2116	Sphingobium_ASV2116	Presence	Absence
497	Novosphingobium_ASV1516	Novosphingobium_ASV1516	Presence	Absence
498	Novosphingobium_ASV1512	Novosphingobium_ASV1512	Presence	Absence
499	Blastomonas_ASV336	Blastomonas_ASV336	Presence	Absence
500	Unclassified_Sphingomonadaceae_10_ASV4748	Unclassified_Sphingomonadaceae_10_ASV4748	Presence	Absence
501	Unclassified_SAR324_clade(Marine_group_B)_4_ASV4598	Unclassified_SAR324_clade(Marine_group_B)_4_ASV4598	Presence	Absence
502	Bdellovibrio_ASV303	Bdellovibrio_ASV303	Presence	Absence
503	Bdellovibrio_ASV304	Bdellovibrio_ASV304	Presence	Absence
504	Bdellovibrio_ASV308	Bdellovibrio_ASV308	Presence	Absence
505	Bdellovibrio_ASV307	Bdellovibrio_ASV307	Presence	Absence
506	Bdellovibrio_ASV305	Bdellovibrio_ASV305	Presence	Absence
507	Bdellovibrio_ASV306	Bdellovibrio_ASV306	Presence	Absence
508	Unclassified_Desulfobacterales_3_ASV3235	Unclassified_Desulfobacterales_3_ASV3235	Presence	Absence
509	Unclassified_Holosporaceae_1_ASV3614	Unclassified_Holosporaceae_1_ASV3614	Presence	Absence
510	Unclassified_Bradymonadaceae_16_ASV2927	Unclassified_Bradymonadaceae_16_ASV2927	Presence	Absence
511	Unclassified_Bradymonadaceae_15_ASV2926	Unclassified_Bradymonadaceae_15_ASV2926	Presence	Absence
512	Unclassified_Bradymonadales_9_ASV2954	Unclassified_Bradymonadales_9_ASV2954	Presence	Absence
513	Unclassified_Bradymonadales_5_ASV2950	Unclassified_Bradymonadales_5_ASV2950	Presence	Absence
514	Unclassified_Bradymonadales_14_ASV2945	Unclassified_Bradymonadales_14_ASV2945	Presence	Absence
515	Desulfovibrio_ASV808	Desulfovibrio_ASV808	Presence	Absence
516	Desulfovibrio_ASV810	Desulfovibrio_ASV810	Presence	Absence
517	Desulfovibrio_ASV820	Desulfovibrio_ASV820	Presence	Absence
518	Bilophila_ASV319	Bilophila_ASV319	Presence	Absence
519	Desulfovibrio_ASV803	Desulfovibrio_ASV803	Presence	Absence
520	Desulfovibrio_ASV805	Desulfovibrio_ASV805	Presence	Absence
521	Desulfovibrio_ASV806	Desulfovibrio_ASV806	Presence	Absence
522	Desulfovibrio_ASV821	Desulfovibrio_ASV821	Presence	Absence
523	Desulfocurvus_ASV783	Desulfocurvus_ASV783	Presence	Absence
524	Unclassified_Oligoflexaceae_4_ASV3996	Unclassified_Oligoflexaceae_4_ASV3996	Presence	Absence
525	Abditibacterium_ASV26	Abditibacterium_ASV26	Presence	Absence
526	Abditibacterium_ASV29	Abditibacterium_ASV29	Presence	Absence
527	Abditibacterium_ASV31	Abditibacterium_ASV31	Presence	Absence
528	Tumebacillus_ASV2389	Tumebacillus_ASV2389	Presence	Absence
529	Nevskia_ASV1473	Nevskia_ASV1473	Presence	Absence
530	Massilia_ASV1336	Massilia_ASV1336	Presence	Absence
531	Unclassified_Burkholderiales_2_ASV2959	Unclassified_Burkholderiales_2_ASV2959	Presence	Absence
532	Unclassified_Rhodocyclaceae_6_ASV4452	Unclassified_Rhodocyclaceae_6_ASV4452	Presence	Absence
533	Unclassified_Burkholderiaceae_2_ASV2956	Unclassified_Burkholderiaceae_2_ASV2956	Presence	Absence
534	Unclassified_Burkholderiaceae_1_ASV2955	Unclassified_Burkholderiaceae_1_ASV2955	Presence	Absence
535	Unclassified_Comamonadaceae_3_ASV3127	Unclassified_Comamonadaceae_3_ASV3127	Presence	Absence
536	Unclassified_Comamonadaceae_9_ASV3136	Unclassified_Comamonadaceae_9_ASV3136	Presence	Absence
537	Unclassified_Comamonadaceae_17_ASV3113	Unclassified_Comamonadaceae_17_ASV3113	Presence	Absence
538	Hydrogenophaga_ASV1099	Hydrogenophaga_ASV1099	Presence	Absence
539	Hydrogenophaga_ASV1098	Hydrogenophaga_ASV1098	Presence	Absence
540	Delftia_ASV732	Delftia_ASV732	Presence	Absence
541	Unclassified_Comamonadaceae_4_ASV3131	Unclassified_Comamonadaceae_4_ASV3131	Presence	Absence
542	Unclassified_Comamonadaceae_30_ASV3128	Unclassified_Comamonadaceae_30_ASV3128	Presence	Absence
543	Unclassified_Neisseriaceae_2_ASV3949	Unclassified_Neisseriaceae_2_ASV3949	Presence	Absence
544	Unclassified_Neisseriaceae_9_ASV3956	Unclassified_Neisseriaceae_9_ASV3956	Presence	Absence
545	Neisseria_ASV1469	Neisseria_ASV1469	Presence	Absence
546	Limnobacter_ASV1268	Limnobacter_ASV1268	Presence	Absence
547	Polynucleobacter_ASV1706	Polynucleobacter_ASV1706	Presence	Absence
548	Unclassified_Alcaligenaceae_4_ASV2539	Unclassified_Alcaligenaceae_4_ASV2539	Presence	Absence
549	Achromobacter_ASV41	Achromobacter_ASV41	Presence	Absence
550	Unclassified_Alcaligenaceae_1_ASV2536	Unclassified_Alcaligenaceae_1_ASV2536	Presence	Absence
551	GKS98_freshwater_group_ASV1020	GKS98_freshwater_group_ASV1020	Presence	Absence
552	GKS98_freshwater_group_ASV1019	GKS98_freshwater_group_ASV1019	Presence	Absence
553	Salinisphaera_ASV2016	Salinisphaera_ASV2016	Presence	Absence
554	Salinisphaera_ASV2022	Salinisphaera_ASV2022	Presence	Absence
555	Salinisphaera_ASV1995	Salinisphaera_ASV1995	Presence	Absence
556	Salinisphaera_ASV2001	Salinisphaera_ASV2001	Presence	Absence
557	Salinisphaera_ASV2012	Salinisphaera_ASV2012	Presence	Absence
558	Salinisphaera_ASV1989	Salinisphaera_ASV1989	Presence	Absence
559	Salinisphaera_ASV2002	Salinisphaera_ASV2002	Presence	Absence
560	Salinisphaera_ASV1987	Salinisphaera_ASV1987	Presence	Absence
561	Salinisphaera_ASV1993	Salinisphaera_ASV1993	Presence	Absence
562	Salinisphaera_ASV2024	Salinisphaera_ASV2024	Presence	Absence
563	Salinisphaera_ASV2018	Salinisphaera_ASV2018	Presence	Absence
564	Salinisphaera_ASV2010	Salinisphaera_ASV2010	Presence	Absence
565	Salinisphaera_ASV1994	Salinisphaera_ASV1994	Presence	Absence
566	Unclassified_Desulfovibrionaceae_3_ASV3284	Unclassified_Desulfovibrionaceae_3_ASV3284	Presence	Absence
567	Unclassified_Desulfobacterales_4_ASV3236	Unclassified_Desulfobacterales_4_ASV3236	Presence	Absence
568	Unclassified_Desulfobacterales_1_ASV3233	Unclassified_Desulfobacterales_1_ASV3233	Presence	Absence
569	Unclassified_Desulfosarcinaceae_6_ASV3274	Unclassified_Desulfosarcinaceae_6_ASV3274	Presence	Absence
570	Unclassified_Desulfovibrionaceae_6_ASV3287	Unclassified_Desulfovibrionaceae_6_ASV3287	Presence	Absence
571	Sva0081_sediment_group_ASV2289	Sva0081_sediment_group_ASV2289	Presence	Absence
572	Chujaibacter_ASV558	Chujaibacter_ASV558	Presence	Absence
573	Silanimonas_ASV2088	Silanimonas_ASV2088	Presence	Absence
574	Unclassified_Xanthomonadaceae_5_ASV4966	Unclassified_Xanthomonadaceae_5_ASV4966	Presence	Absence
575	Rhodanobacter_ASV1823	Rhodanobacter_ASV1823	Presence	Absence
576	Luteibacter_ASV1278	Luteibacter_ASV1278	Presence	Absence
577	Unclassified_Rhodanobacteraceae_3_ASV4342	Unclassified_Rhodanobacteraceae_3_ASV4342	Presence	Absence
578	Unclassified_Chromatiaceae_14_ASV3057	Unclassified_Chromatiaceae_14_ASV3057	Presence	Absence
579	Allochromatium_ASV136	Allochromatium_ASV136	Presence	Absence
580	Alcanivorax_ASV114	Alcanivorax_ASV114	Presence	Absence
581	Unclassified_Gammaproteobacteria_19_ASV3472	Unclassified_Gammaproteobacteria_19_ASV3472	Presence	Absence
582	Alcanivorax_ASV109	Alcanivorax_ASV109	Presence	Absence
583	Unclassified_Wohlfahrtiimonadaceae_2_ASV4948	Unclassified_Wohlfahrtiimonadaceae_2_ASV4948	Presence	Absence
584	Unclassified_Methylococcaceae_1_ASV3832	Unclassified_Methylococcaceae_1_ASV3832	Presence	Absence
585	Methyloparacoccus_ASV1384	Methyloparacoccus_ASV1384	Presence	Absence
586	Methyloparacoccus_ASV1385	Methyloparacoccus_ASV1385	Presence	Absence
587	Methyloparacoccus_ASV1386	Methyloparacoccus_ASV1386	Presence	Absence
588	Candidatus_Thiosymbion_ASV479	Candidatus_Thiosymbion_ASV479	Presence	Absence
589	Unclassified_Gammaproteobacteria_59_ASV3516	Unclassified_Gammaproteobacteria_59_ASV3516	Presence	Absence
590	Halochromatium_ASV1059	Halochromatium_ASV1059	Presence	Absence
591	Unclassified_Gammaproteobacteria_9_ASV3535	Unclassified_Gammaproteobacteria_9_ASV3535	Presence	Absence
592	Unclassified_Chromatiaceae_2_ASV3062	Unclassified_Chromatiaceae_2_ASV3062	Presence	Absence
593	Unclassified_Chromatiaceae_4_ASV3064	Unclassified_Chromatiaceae_4_ASV3064	Presence	Absence
594	Unclassified_Chromatiaceae_6_ASV3066	Unclassified_Chromatiaceae_6_ASV3066	Presence	Absence
595	Unclassified_Chromatiaceae_11_ASV3054	Unclassified_Chromatiaceae_11_ASV3054	Presence	Absence
596	Unclassified_Chromatiaceae_13_ASV3056	Unclassified_Chromatiaceae_13_ASV3056	Presence	Absence
597	Unclassified_Chromatiaceae_9_ASV3069	Unclassified_Chromatiaceae_9_ASV3069	Presence	Absence
598	Thiocapsa_ASV2354	Thiocapsa_ASV2354	Presence	Absence
599	Thiocapsa_ASV2355	Thiocapsa_ASV2355	Presence	Absence
600	Unclassified_Chromatiaceae_7_ASV3067	Unclassified_Chromatiaceae_7_ASV3067	Presence	Absence
601	Unclassified_Chromatiaceae_5_ASV3065	Unclassified_Chromatiaceae_5_ASV3065	Presence	Absence
602	Thiohalocapsa_ASV2358	Thiohalocapsa_ASV2358	Presence	Absence
603	Unclassified_Chromatiaceae_15_ASV3058	Unclassified_Chromatiaceae_15_ASV3058	Presence	Absence
604	Coxiella_ASV683	Coxiella_ASV683	Presence	Absence
605	Coxiella_ASV679	Coxiella_ASV679	Presence	Absence
606	Woeseia_ASV5095	Woeseia_ASV5095	Presence	Absence
607	Marinobacterium_ASV1316	Marinobacterium_ASV1316	Presence	Absence
608	Nitrincola_ASV1477	Nitrincola_ASV1477	Presence	Absence
609	Nitrincola_ASV1476	Nitrincola_ASV1476	Presence	Absence
610	Pseudomonas_ASV1765	Pseudomonas_ASV1765	Presence	Absence
611	Marinobacter_ASV1310	Marinobacter_ASV1310	Presence	Absence
612	Marinobacter_ASV1307	Marinobacter_ASV1307	Presence	Absence
613	Marinobacter_ASV1308	Marinobacter_ASV1308	Presence	Absence
614	Marinobacter_ASV1311	Marinobacter_ASV1311	Presence	Absence
615	Pseudomonas_ASV1773	Pseudomonas_ASV1773	Presence	Absence
616	Pseudomonas_ASV1772	Pseudomonas_ASV1772	Presence	Absence
617	Pseudomonas_ASV1768	Pseudomonas_ASV1768	Presence	Absence
618	Pseudomonas_ASV1764	Pseudomonas_ASV1764	Presence	Absence
619	Unclassified_Pseudomonadaceae_1_ASV4249	Unclassified_Pseudomonadaceae_1_ASV4249	Presence	Absence
620	Unclassified_Alteromonadaceae_1_ASV2578	Unclassified_Alteromonadaceae_1_ASV2578	Presence	Absence
621	Steroidobacter_ASV2234	Steroidobacter_ASV2234	Presence	Absence
622	BD1-7_clade_ASV292	BD1-7_clade_ASV292	Presence	Absence
623	Acinetobacter_ASV64	Acinetobacter_ASV64	Presence	Absence
624	Snodgrassella_ASV2105	Snodgrassella_ASV2105	Presence	Absence
625	Acinetobacter_ASV50	Acinetobacter_ASV50	Presence	Absence
626	Unclassified_Enterobacteriaceae_5_ASV3342	Unclassified_Enterobacteriaceae_5_ASV3342	Presence	Absence
627	Pantoea_ASV1586	Pantoea_ASV1586	Presence	Absence
628	Gilliamella_ASV1016	Gilliamella_ASV1016	Presence	Absence
629	Haemophilus_ASV1042	Haemophilus_ASV1042	Presence	Absence
630	Unclassified_Pasteurellaceae_11_ASV4046	Unclassified_Pasteurellaceae_11_ASV4046	Presence	Absence
631	Rodentibacter_ASV1891	Rodentibacter_ASV1891	Presence	Absence
632	Morganella_ASV1411	Morganella_ASV1411	Presence	Absence
633	Xenorhabdus_ASV5112	Xenorhabdus_ASV5112	Presence	Absence
634	Aliidiomarina_ASV126	Aliidiomarina_ASV126	Presence	Absence
635	Idiomarina_ASV1123	Idiomarina_ASV1123	Presence	Absence
636	Oceanimonas_ASV1529	Oceanimonas_ASV1529	Presence	Absence
637	Vibrio_ASV5060	Vibrio_ASV5060	Presence	Absence
638	Vibrio_ASV5055	Vibrio_ASV5055	Presence	Absence
639	Serratia_ASV2073	Serratia_ASV2073	Presence	Absence
640	Serratia_ASV2076	Serratia_ASV2076	Presence	Absence
641	Serratia_ASV2074	Serratia_ASV2074	Presence	Absence
642	Escherichia-Shigella_ASV906	Escherichia-Shigella_ASV906	Presence	Absence
643	Escherichia-Shigella_ASV901	Escherichia-Shigella_ASV901	Presence	Absence
644	Escherichia-Shigella_ASV896	Escherichia-Shigella_ASV896	Presence	Absence
645	Escherichia-Shigella_ASV903	Escherichia-Shigella_ASV903	Presence	Absence
646	Escherichia-Shigella_ASV895	Escherichia-Shigella_ASV895	Presence	Absence
647	Unclassified_Enterobacterales_2_ASV3321	Unclassified_Enterobacterales_2_ASV3321	Presence	Absence
648	Unclassified_Enterobacteriaceae_17_ASV3334	Unclassified_Enterobacteriaceae_17_ASV3334	Presence	Absence
649	Unclassified_Enterobacteriaceae_1_ASV3326	Unclassified_Enterobacteriaceae_1_ASV3326	Presence	Absence
650	Unclassified_Erwiniaceae_4_ASV3359	Unclassified_Erwiniaceae_4_ASV3359	Presence	Absence
651	Unclassified_Enterobacteriaceae_15_ASV3332	Unclassified_Enterobacteriaceae_15_ASV3332	Presence	Absence
652	Unclassified_Erwiniaceae_8_ASV3363	Unclassified_Erwiniaceae_8_ASV3363	Presence	Absence
653	Unclassified_Erwiniaceae_5_ASV3360	Unclassified_Erwiniaceae_5_ASV3360	Presence	Absence
654	9M32_ASV25	9M32_ASV25	Presence	Absence
655	Moraxella_ASV1410	Moraxella_ASV1410	Presence	Absence
656	Psychrobacter_ASV1785	Psychrobacter_ASV1785	Presence	Absence
657	Acinetobacter_ASV52	Acinetobacter_ASV52	Presence	Absence
658	Acinetobacter_ASV61	Acinetobacter_ASV61	Presence	Absence
659	Acinetobacter_ASV54	Acinetobacter_ASV54	Presence	Absence
660	Unclassified_Moraxellaceae_2_ASV3901	Unclassified_Moraxellaceae_2_ASV3901	Presence	Absence
661	[Agitococcus]_lubricus_group_ASV1	[Agitococcus]_lubricus_group_ASV1	Presence	Absence
662	[Agitococcus]_lubricus_group_ASV2	[Agitococcus]_lubricus_group_ASV2	Presence	Absence
663	OM60(NOR5)_clade_ASV1548	OM60(NOR5)_clade_ASV1548	Presence	Absence
664	Unclassified_Alteromonadaceae_2_ASV2579	Unclassified_Alteromonadaceae_2_ASV2579	Presence	Absence
665	Alishewanella_ASV128	Alishewanella_ASV128	Presence	Absence
666	Pseudohongiella_ASV1748	Pseudohongiella_ASV1748	Presence	Absence
667	Unclassified_OM182_clade_2_ASV3999	Unclassified_OM182_clade_2_ASV3999	Presence	Absence
668	Unclassified_Pseudomonadales_5_ASV4254	Unclassified_Pseudomonadales_5_ASV4254	Presence	Absence
669	Halomonas_ASV1065	Halomonas_ASV1065	Presence	Absence
670	Halomonas_ASV1076	Halomonas_ASV1076	Presence	Absence
671	Halomonas_ASV1072	Halomonas_ASV1072	Presence	Absence
672	Halomonas_ASV1067	Halomonas_ASV1067	Presence	Absence
673	Halomonas_ASV1077	Halomonas_ASV1077	Presence	Absence
674	Unclassified_Halomonadaceae_5_ASV3609	Unclassified_Halomonadaceae_5_ASV3609	Presence	Absence
675	Halomonas_ASV1071	Halomonas_ASV1071	Presence	Absence
676	Chromohalobacter_ASV545	Chromohalobacter_ASV545	Presence	Absence
677	Marinospirillum_ASV1327	Marinospirillum_ASV1327	Presence	Absence
678	Marinospirillum_ASV1328	Marinospirillum_ASV1328	Presence	Absence
679	Alcanivorax_ASV117	Alcanivorax_ASV117	Presence	Absence
680	Unclassified_Gammaproteobacteria_4_ASV3495	Unclassified_Gammaproteobacteria_4_ASV3495	Presence	Absence
681	Unclassified_Gammaproteobacteria_63_ASV3521	Unclassified_Gammaproteobacteria_63_ASV3521	Presence	Absence
682	Unclassified_Gammaproteobacteria_69_ASV3527	Unclassified_Gammaproteobacteria_69_ASV3527	Presence	Absence
683	Unclassified_Gammaproteobacteria_65_ASV3523	Unclassified_Gammaproteobacteria_65_ASV3523	Presence	Absence
684	Wenzhouxiangella_ASV5089	Wenzhouxiangella_ASV5089	Presence	Absence
685	Unknown_Family_Gammaproteobacteria_Incertae_Sedis_15_ASV5009	Unknown_Family_Gammaproteobacteria_Incertae_Sedis_15_ASV5009	Presence	Absence
686	Wenzhouxiangella_ASV5090	Wenzhouxiangella_ASV5090	Presence	Absence
687	Unclassified_Nitrococcaceae_1_ASV3959	Unclassified_Nitrococcaceae_1_ASV3959	Presence	Absence
688	Unclassified_Nitrococcaceae_4_ASV3962	Unclassified_Nitrococcaceae_4_ASV3962	Presence	Absence
689	Unclassified_Nitrococcaceae_3_ASV3961	Unclassified_Nitrococcaceae_3_ASV3961	Presence	Absence
690	Methylophaga_ASV1390	Methylophaga_ASV1390	Presence	Absence
691	Candidatus_Thiobios_ASV475	Candidatus_Thiobios_ASV475	Presence	Absence
692	Aquicella_ASV205	Aquicella_ASV205	Presence	Absence
693	Unclassified_Diplorickettsiaceae_4_ASV3307	Unclassified_Diplorickettsiaceae_4_ASV3307	Presence	Absence
694	Unclassified_Diplorickettsiaceae_1_ASV3304	Unclassified_Diplorickettsiaceae_1_ASV3304	Presence	Absence
695	Unclassified_Gammaproteobacteria_38_ASV3493	Unclassified_Gammaproteobacteria_38_ASV3493	Presence	Absence
696	Candidatus_Berkiella_ASV415	Candidatus_Berkiella_ASV415	Presence	Absence
697	Legionella_ASV1212	Legionella_ASV1212	Presence	Absence
698	Legionella_ASV1222	Legionella_ASV1222	Presence	Absence
699	Legionella_ASV1218	Legionella_ASV1218	Presence	Absence
700	Legionella_ASV1226	Legionella_ASV1226	Presence	Absence
701	Legionella_ASV1223	Legionella_ASV1223	Presence	Absence
702	Legionella_ASV1207	Legionella_ASV1207	Presence	Absence
703	Legionella_ASV1208	Legionella_ASV1208	Presence	Absence
704	Legionella_ASV1229	Legionella_ASV1229	Presence	Absence
705	Legionella_ASV1214	Legionella_ASV1214	Presence	Absence
706	Legionella_ASV1224	Legionella_ASV1224	Presence	Absence
707	Legionella_ASV1215	Legionella_ASV1215	Presence	Absence
708	Legionella_ASV1219	Legionella_ASV1219	Presence	Absence
709	Legionella_ASV1216	Legionella_ASV1216	Presence	Absence
710	Unclassified_Leptospiraceae_1_ASV3783	Unclassified_Leptospiraceae_1_ASV3783	Presence	Absence
711	Unclassified_Arcobacteraceae_3_ASV2630	Unclassified_Arcobacteraceae_3_ASV2630	Presence	Absence
712	Unclassified_Arcobacteraceae_2_ASV2629	Unclassified_Arcobacteraceae_2_ASV2629	Presence	Absence
713	Sulfurovum_ASV2275	Sulfurovum_ASV2275	Presence	Absence
714	Sulfurospirillum_ASV2274	Sulfurospirillum_ASV2274	Presence	Absence
715	Campylobacter_ASV402	Campylobacter_ASV402	Presence	Absence
716	Helicobacter_ASV1082	Helicobacter_ASV1082	Presence	Absence
717	Helicobacter_ASV1083	Helicobacter_ASV1083	Presence	Absence
718	Unclassified_UBA12409_1_ASV4865	Unclassified_UBA12409_1_ASV4865	Presence	Absence
719	Unclassified_UBA12409_2_ASV4866	Unclassified_UBA12409_2_ASV4866	Presence	Absence
720	Unclassified_Vermiphilaceae_2_ASV4888	Unclassified_Vermiphilaceae_2_ASV4888	Presence	Absence
721	Unclassified_Vermiphilaceae_3_ASV4889	Unclassified_Vermiphilaceae_3_ASV4889	Presence	Absence
722	Unclassified_Vermiphilaceae_6_ASV4892	Unclassified_Vermiphilaceae_6_ASV4892	Presence	Absence
723	Unclassified_Vermiphilaceae_5_ASV4891	Unclassified_Vermiphilaceae_5_ASV4891	Presence	Absence
724	Unclassified_Vermiphilaceae_1_ASV4887	Unclassified_Vermiphilaceae_1_ASV4887	Presence	Absence
725	Unclassified_Babeliales_8_ASV2675	Unclassified_Babeliales_8_ASV2675	Presence	Absence
726	Unclassified_Vermiphilaceae_4_ASV4890	Unclassified_Vermiphilaceae_4_ASV4890	Presence	Absence
727	Unclassified_Babeliales_6_ASV2673	Unclassified_Babeliales_6_ASV2673	Presence	Absence
728	Unclassified_Babeliales_9_ASV2676	Unclassified_Babeliales_9_ASV2676	Presence	Absence
729	Unclassified_Babeliales_4_ASV2671	Unclassified_Babeliales_4_ASV2671	Presence	Absence
730	Unclassified_Saccharimonadales_1_ASV4510	Unclassified_Saccharimonadales_1_ASV4510	Presence	Absence
731	Candidatus_Peribacteria_ASV463	Candidatus_Peribacteria_ASV463	Presence	Absence
732	Unclassified_Gracilibacteria_2_ASV3593	Unclassified_Gracilibacteria_2_ASV3593	Presence	Absence
733	Candidatus_Yanofskybacteria_ASV490	Candidatus_Yanofskybacteria_ASV490	Presence	Absence
734	Unclassified_Parcubacteria_7_ASV4040	Unclassified_Parcubacteria_7_ASV4040	Presence	Absence
735	Unclassified_Parcubacteria_14_ASV4032	Unclassified_Parcubacteria_14_ASV4032	Presence	Absence
736	Unclassified_Parcubacteria_16_ASV4034	Unclassified_Parcubacteria_16_ASV4034	Presence	Absence
737	Unclassified_Parcubacteria_6_ASV4039	Unclassified_Parcubacteria_6_ASV4039	Presence	Absence
738	Turicibacter_ASV2393	Turicibacter_ASV2393	Presence	Absence
739	Mycoplasma_ASV1445	Mycoplasma_ASV1445	Presence	Absence
740	Mycoplasma_ASV1455	Mycoplasma_ASV1455	Presence	Absence
741	Mycoplasma_ASV1440	Mycoplasma_ASV1440	Presence	Absence
742	Mycoplasma_ASV1449	Mycoplasma_ASV1449	Presence	Absence
743	Gemella_ASV995	Gemella_ASV995	Presence	Absence
744	Brevinema_ASV364	Brevinema_ASV364	Presence	Absence
745	Atopostipes_ASV231	Atopostipes_ASV231	Presence	Absence
746	Alkalibacterium_ASV131	Alkalibacterium_ASV131	Presence	Absence
747	Staphylococcus_ASV2216	Staphylococcus_ASV2216	Presence	Absence
748	Staphylococcus_ASV2222	Staphylococcus_ASV2222	Presence	Absence
749	Bacillus_ASV259	Bacillus_ASV259	Presence	Absence
750	Bacillus_ASV252	Bacillus_ASV252	Presence	Absence
751	Bacillus_ASV256	Bacillus_ASV256	Presence	Absence
752	Gemella_ASV990	Gemella_ASV990	Presence	Absence
753	Gemella_ASV989	Gemella_ASV989	Presence	Absence
754	Gemella_ASV985	Gemella_ASV985	Presence	Absence
755	Gemella_ASV991	Gemella_ASV991	Presence	Absence
756	Virgibacillus_ASV5068	Virgibacillus_ASV5068	Presence	Absence
757	Halolactibacillus_ASV1064	Halolactibacillus_ASV1064	Presence	Absence
758	Unclassified_Bacillaceae_8_ASV2692	Unclassified_Bacillaceae_8_ASV2692	Presence	Absence
759	Virgibacillus_ASV5069	Virgibacillus_ASV5069	Presence	Absence
760	Virgibacillus_ASV5074	Virgibacillus_ASV5074	Presence	Absence
761	Oceanobacillus_ASV1532	Oceanobacillus_ASV1532	Presence	Absence
762	Unclassified_Bacillaceae_4_ASV2688	Unclassified_Bacillaceae_4_ASV2688	Presence	Absence
763	Virgibacillus_ASV5070	Virgibacillus_ASV5070	Presence	Absence
764	Oceanobacillus_ASV1534	Oceanobacillus_ASV1534	Presence	Absence
765	Unclassified_Bacillaceae_12_ASV2680	Unclassified_Bacillaceae_12_ASV2680	Presence	Absence
766	Bacillus_ASV262	Bacillus_ASV262	Presence	Absence
767	Bacillus_ASV249	Bacillus_ASV249	Presence	Absence
768	Unclassified_Planococcaceae_1_ASV4221	Unclassified_Planococcaceae_1_ASV4221	Presence	Absence
769	Trichococcus_ASV2378	Trichococcus_ASV2378	Presence	Absence
770	Trichococcus_ASV2377	Trichococcus_ASV2377	Presence	Absence
771	Trichococcus_ASV2379	Trichococcus_ASV2379	Presence	Absence
772	Weissella_ASV5079	Weissella_ASV5079	Presence	Absence
773	Leuconostoc_ASV1253	Leuconostoc_ASV1253	Presence	Absence
774	Unclassified_Lactobacillaceae_3_ASV3716	Unclassified_Lactobacillaceae_3_ASV3716	Presence	Absence
775	Lactobacillus_ASV1177	Lactobacillus_ASV1177	Presence	Absence
776	Lactobacillus_ASV1180	Lactobacillus_ASV1180	Presence	Absence
777	Unclassified_Gastranaerophilales_11_ASV3539	Unclassified_Gastranaerophilales_11_ASV3539	Presence	Absence
778	Unclassified_Gastranaerophilales_5_ASV3544	Unclassified_Gastranaerophilales_5_ASV3544	Presence	Absence
779	Cyanobacterium_PCC-7202_ASV692	Cyanobacterium_PCC-7202_ASV692	Presence	Absence
780	Unclassified_Nodosilineaceae_4_ASV3982	Unclassified_Nodosilineaceae_4_ASV3982	Presence	Absence
781	Phormidium_MBIC10003_ASV1664	Phormidium_MBIC10003_ASV1664	Presence	Absence
782	Phormidium_MBIC10003_ASV1660	Phormidium_MBIC10003_ASV1660	Presence	Absence
783	Phormidium_MBIC10003_ASV1666	Phormidium_MBIC10003_ASV1666	Presence	Absence
784	Gloeocapsa_ASV1021	Gloeocapsa_ASV1021	Presence	Absence
785	Chroococcidiopsis_PCC_7203_ASV546	Chroococcidiopsis_PCC_7203_ASV546	Presence	Absence
786	Unclassified_Coleofasciculaceae_6_ASV3104	Unclassified_Coleofasciculaceae_6_ASV3104	Presence	Absence
787	Synechocystis_PCC-6803_ASV2313	Synechocystis_PCC-6803_ASV2313	Presence	Absence
788	Unclassified_Leptolyngbyaceae_15_ASV3774	Unclassified_Leptolyngbyaceae_15_ASV3774	Presence	Absence
789	Unclassified_Leptolyngbyaceae_13_ASV3772	Unclassified_Leptolyngbyaceae_13_ASV3772	Presence	Absence
790	Unclassified_Leptolyngbyaceae_5_ASV3778	Unclassified_Leptolyngbyaceae_5_ASV3778	Presence	Absence
791	Unclassified_Leptolyngbyaceae_6_ASV3779	Unclassified_Leptolyngbyaceae_6_ASV3779	Presence	Absence
792	Unclassified_Leptolyngbyaceae_2_ASV3775	Unclassified_Leptolyngbyaceae_2_ASV3775	Presence	Absence
793	Leptolyngbya_PCC-6306_ASV1237	Leptolyngbya_PCC-6306_ASV1237	Presence	Absence
794	Scytonema_VB-61278_ASV2050	Scytonema_VB-61278_ASV2050	Presence	Absence
795	Scytonema_VB-61278_ASV2045	Scytonema_VB-61278_ASV2045	Presence	Absence
796	Scytonema_VB-61278_ASV2043	Scytonema_VB-61278_ASV2043	Presence	Absence
797	Unclassified_Cyanobacteriales_8_ASV3166	Unclassified_Cyanobacteriales_8_ASV3166	Presence	Absence
798	Unclassified_Nostocaceae_2_ASV3984	Unclassified_Nostocaceae_2_ASV3984	Presence	Absence
799	Unclassified_Cyanobacteriia_2_ASV3169	Unclassified_Cyanobacteriia_2_ASV3169	Presence	Absence
800	Limnothrix_ASV1270	Limnothrix_ASV1270	Presence	Absence
801	Cyanobium_PCC-6307_ASV701	Cyanobium_PCC-6307_ASV701	Presence	Absence
802	Cyanobium_PCC-6307_ASV696	Cyanobium_PCC-6307_ASV696	Presence	Absence
803	Cyanobium_PCC-6307_ASV710	Cyanobium_PCC-6307_ASV710	Presence	Absence
804	Cyanobium_PCC-6307_ASV698	Cyanobium_PCC-6307_ASV698	Presence	Absence
805	Cyanobium_PCC-6307_ASV709	Cyanobium_PCC-6307_ASV709	Presence	Absence
806	Cyanobium_PCC-6307_ASV695	Cyanobium_PCC-6307_ASV695	Presence	Absence
807	Cyanobium_PCC-6307_ASV694	Cyanobium_PCC-6307_ASV694	Presence	Absence
808	Cyanobium_PCC-6307_ASV706	Cyanobium_PCC-6307_ASV706	Presence	Absence
809	Cyanobium_PCC-6307_ASV699	Cyanobium_PCC-6307_ASV699	Presence	Absence
810	Cyanobium_PCC-6307_ASV713	Cyanobium_PCC-6307_ASV713	Presence	Absence
811	Cyanobium_PCC-6307_ASV700	Cyanobium_PCC-6307_ASV700	Presence	Absence
812	Cyanobium_PCC-6307_ASV697	Cyanobium_PCC-6307_ASV697	Presence	Absence
813	Cyanobium_PCC-6307_ASV708	Cyanobium_PCC-6307_ASV708	Presence	Absence
814	Nodosilinea_PCC-7104_ASV1504	Nodosilinea_PCC-7104_ASV1504	Presence	Absence
815	Unclassified_Gastranaerophilales_3_ASV3542	Unclassified_Gastranaerophilales_3_ASV3542	Presence	Absence
816	Unclassified_Clostridia_3_ASV3081	Unclassified_Clostridia_3_ASV3081	Presence	Absence
817	Unclassified_Acidaminococcaceae_1_ASV2478	Unclassified_Acidaminococcaceae_1_ASV2478	Presence	Absence
818	Unclassified_Sporomusaceae_1_ASV4785	Unclassified_Sporomusaceae_1_ASV4785	Presence	Absence
819	Erysipelatoclostridium_ASV881	Erysipelatoclostridium_ASV881	Presence	Absence
820	Erysipelatoclostridium_ASV879	Erysipelatoclostridium_ASV879	Presence	Absence
821	Erysipelothrix_ASV882	Erysipelothrix_ASV882	Presence	Absence
822	Streptococcus_ASV2253	Streptococcus_ASV2253	Presence	Absence
823	Mycoplasma_ASV1450	Mycoplasma_ASV1450	Presence	Absence
824	Mycoplasma_ASV1454	Mycoplasma_ASV1454	Presence	Absence
825	Ureaplasma_ASV5032	Ureaplasma_ASV5032	Presence	Absence
826	Unclassified_RF39_19_ASV4280	Unclassified_RF39_19_ASV4280	Presence	Absence
827	Unclassified_Anaerovoracaceae_2_ASV2627	Unclassified_Anaerovoracaceae_2_ASV2627	Presence	Absence
828	Anaerococcus_ASV180	Anaerococcus_ASV180	Presence	Absence
829	Anaerococcus_ASV176	Anaerococcus_ASV176	Presence	Absence
830	Anaerococcus_ASV187	Anaerococcus_ASV187	Presence	Absence
831	Anaerococcus_ASV184	Anaerococcus_ASV184	Presence	Absence
832	Peptoniphilus_ASV1622	Peptoniphilus_ASV1622	Presence	Absence
833	Peptoniphilus_ASV1624	Peptoniphilus_ASV1624	Presence	Absence
834	Peptoniphilus_ASV1621	Peptoniphilus_ASV1621	Presence	Absence
835	Tissierella_ASV2367	Tissierella_ASV2367	Presence	Absence
836	Tissierella_ASV2368	Tissierella_ASV2368	Presence	Absence
837	TC1_ASV2327	TC1_ASV2327	Presence	Absence
838	Candidatus_Tammella_ASV473	Candidatus_Tammella_ASV473	Presence	Absence
839	Unclassified_Synergistaceae_5_ASV4837	Unclassified_Synergistaceae_5_ASV4837	Presence	Absence
840	Unclassified_Synergistaceae_4_ASV4836	Unclassified_Synergistaceae_4_ASV4836	Presence	Absence
841	Unclassified_Synergistaceae_2_ASV4834	Unclassified_Synergistaceae_2_ASV4834	Presence	Absence
842	Unclassified_Synergistaceae_3_ASV4835	Unclassified_Synergistaceae_3_ASV4835	Presence	Absence
843	Unclassified_Synergistaceae_1_ASV4833	Unclassified_Synergistaceae_1_ASV4833	Presence	Absence
844	Anaerofustis_ASV190	Anaerofustis_ASV190	Presence	Absence
845	Acetobacterium_ASV38	Acetobacterium_ASV38	Presence	Absence
846	Unclassified_Peptococcaceae_2_ASV4094	Unclassified_Peptococcaceae_2_ASV4094	Presence	Absence
847	Unclassified_Peptococcaceae_3_ASV4095	Unclassified_Peptococcaceae_3_ASV4095	Presence	Absence
848	Unclassified_Christensenellaceae_2_ASV3047	Unclassified_Christensenellaceae_2_ASV3047	Presence	Absence
849	Unclassified_Clostridia_5_ASV3083	Unclassified_Clostridia_5_ASV3083	Presence	Absence
850	Peptostreptococcus_ASV1627	Peptostreptococcus_ASV1627	Presence	Absence
851	Romboutsia_ASV1893	Romboutsia_ASV1893	Presence	Absence
852	Romboutsia_ASV1898	Romboutsia_ASV1898	Presence	Absence
853	Clostridiisalibacter_ASV564	Clostridiisalibacter_ASV564	Presence	Absence
854	Defluviitaleaceae_UCG-011_ASV729	Defluviitaleaceae_UCG-011_ASV729	Presence	Absence
855	Tyzzerella_ASV2399	Tyzzerella_ASV2399	Presence	Absence
856	Tyzzerella_ASV2396	Tyzzerella_ASV2396	Presence	Absence
857	Unclassified_Lachnospiraceae_27_ASV3701	Unclassified_Lachnospiraceae_27_ASV3701	Presence	Absence
858	Unclassified_Lachnospiraceae_17_ASV3690	Unclassified_Lachnospiraceae_17_ASV3690	Presence	Absence
859	Lachnospiraceae_AC2044_group_ASV1161	Lachnospiraceae_AC2044_group_ASV1161	Presence	Absence
860	Unclassified_Lachnospiraceae_4_ASV3707	Unclassified_Lachnospiraceae_4_ASV3707	Presence	Absence
861	GCA-900066575_ASV984	GCA-900066575_ASV984	Presence	Absence
862	Unclassified_Lachnospiraceae_13_ASV3686	Unclassified_Lachnospiraceae_13_ASV3686	Presence	Absence
863	Unclassified_Lachnospiraceae_12_ASV3685	Unclassified_Lachnospiraceae_12_ASV3685	Presence	Absence
864	Unclassified_Lachnospiraceae_3_ASV3704	Unclassified_Lachnospiraceae_3_ASV3704	Presence	Absence
865	Unclassified_Lachnospiraceae_29_ASV3703	Unclassified_Lachnospiraceae_29_ASV3703	Presence	Absence
866	Unclassified_Lachnospiraceae_11_ASV3684	Unclassified_Lachnospiraceae_11_ASV3684	Presence	Absence
867	Unclassified_Lachnospiraceae_2_ASV3693	Unclassified_Lachnospiraceae_2_ASV3693	Presence	Absence
868	Lachnoclostridium_ASV1151	Lachnoclostridium_ASV1151	Presence	Absence
869	Blautia_ASV342	Blautia_ASV342	Presence	Absence
870	Lachnoclostridium_ASV1157	Lachnoclostridium_ASV1157	Presence	Absence
871	Lachnoclostridium_ASV1156	Lachnoclostridium_ASV1156	Presence	Absence
872	Lachnoclostridium_ASV1152	Lachnoclostridium_ASV1152	Presence	Absence
873	Lachnoclostridium_ASV1158	Lachnoclostridium_ASV1158	Presence	Absence
874	Defluviitaleaceae_UCG-011_ASV727	Defluviitaleaceae_UCG-011_ASV727	Presence	Absence
875	Unclassified_Oscillospiraceae_3_ASV4019	Unclassified_Oscillospiraceae_3_ASV4019	Presence	Absence
876	Unclassified_Hungateiclostridiaceae_2_ASV3616	Unclassified_Hungateiclostridiaceae_2_ASV3616	Presence	Absence
877	Unclassified_[Eubacterium]_coprostanoligenes_group_1_ASV2416	Unclassified_[Eubacterium]_coprostanoligenes_group_1_ASV2416	Presence	Absence
878	Unclassified_[Eubacterium]_coprostanoligenes_group_3_ASV2418	Unclassified_[Eubacterium]_coprostanoligenes_group_3_ASV2418	Presence	Absence
879	Unclassified_Ruminococcaceae_4_ASV4501	Unclassified_Ruminococcaceae_4_ASV4501	Presence	Absence
880	Unclassified_Oscillospirales_1_ASV4021	Unclassified_Oscillospirales_1_ASV4021	Presence	Absence
881	Candidatus_Soleaferrea_ASV472	Candidatus_Soleaferrea_ASV472	Presence	Absence
882	Unclassified_Ruminococcaceae_1_ASV4489	Unclassified_Ruminococcaceae_1_ASV4489	Presence	Absence
883	Candidatus_Soleaferrea_ASV468	Candidatus_Soleaferrea_ASV468	Presence	Absence
884	Candidatus_Soleaferrea_ASV471	Candidatus_Soleaferrea_ASV471	Presence	Absence
885	Candidatus_Soleaferrea_ASV469	Candidatus_Soleaferrea_ASV469	Presence	Absence
886	Unclassified_Oscillospiraceae_4_ASV4020	Unclassified_Oscillospiraceae_4_ASV4020	Presence	Absence
887	Unclassified_Oscillospiraceae_2_ASV4018	Unclassified_Oscillospiraceae_2_ASV4018	Presence	Absence
888	Fastidiosipila_ASV918	Fastidiosipila_ASV918	Presence	Absence
889	Unclassified_UCG-010_ASV2409	Unclassified_UCG-010_ASV2409	Presence	Absence
890	Christensenellaceae_R-7_group_ASV522	Christensenellaceae_R-7_group_ASV522	Presence	Absence
891	Unclassified_Clostridiaceae_1_ASV3098	Unclassified_Clostridiaceae_1_ASV3098	Presence	Absence
892	Clostridium_sensu_stricto_1_ASV580	Clostridium_sensu_stricto_1_ASV580	Presence	Absence
893	Clostridium_sensu_stricto_1_ASV598	Clostridium_sensu_stricto_1_ASV598	Presence	Absence
894	Clostridium_sensu_stricto_1_ASV603	Clostridium_sensu_stricto_1_ASV603	Presence	Absence
895	Clostridium_sensu_stricto_1_ASV572	Clostridium_sensu_stricto_1_ASV572	Presence	Absence
896	Clostridium_sensu_stricto_1_ASV597	Clostridium_sensu_stricto_1_ASV597	Presence	Absence
897	Clostridium_sensu_stricto_1_ASV602	Clostridium_sensu_stricto_1_ASV602	Presence	Absence
898	Clostridium_sensu_stricto_1_ASV571	Clostridium_sensu_stricto_1_ASV571	Presence	Absence
899	Clostridium_sensu_stricto_1_ASV605	Clostridium_sensu_stricto_1_ASV605	Presence	Absence
900	Christensenellaceae_R-7_group_ASV535	Christensenellaceae_R-7_group_ASV535	Presence	Absence
901	Christensenellaceae_R-7_group_ASV539	Christensenellaceae_R-7_group_ASV539	Presence	Absence
902	Christensenellaceae_R-7_group_ASV541	Christensenellaceae_R-7_group_ASV541	Presence	Absence
903	Christensenellaceae_R-7_group_ASV543	Christensenellaceae_R-7_group_ASV543	Presence	Absence
904	Christensenellaceae_R-7_group_ASV525	Christensenellaceae_R-7_group_ASV525	Presence	Absence
905	Christensenellaceae_R-7_group_ASV530	Christensenellaceae_R-7_group_ASV530	Presence	Absence
906	Christensenellaceae_R-7_group_ASV531	Christensenellaceae_R-7_group_ASV531	Presence	Absence
907	Christensenellaceae_R-7_group_ASV517	Christensenellaceae_R-7_group_ASV517	Presence	Absence
908	Unclassified_CPR2_ASV684	Unclassified_CPR2_ASV684	Presence	Absence
909	Cellulosilyticum_ASV502	Cellulosilyticum_ASV502	Presence	Absence
910	Cellulosilyticum_ASV501	Cellulosilyticum_ASV501	Presence	Absence
911	Peptococcus_ASV1619	Peptococcus_ASV1619	Presence	Absence
