# Supplementary material
Source: Research Square preprint supplement (doi:10.21203/rs.3.rs-9440532/v1)
Supplement: Supplementary file 3 [file 7fb3b0aa7904a71d89310a69.xlsx]

## Sheet: Structural_zero_female_tIgG_low
	Taxon	species	Low	High
1	Sumerlaea_ASV2281	Sumerlaea_ASV2281	Absence	Presence
2	Unclassified_Calditrichaceae_7_ASV2978	Unclassified_Calditrichaceae_7_ASV2978	Absence	Presence
3	Unclassified_Kapabacteriales_3_ASV3669	Unclassified_Kapabacteriales_3_ASV3669	Absence	Presence
4	Unclassified_MAT-CR-H6-H10_2_ASV3818	Unclassified_MAT-CR-H6-H10_2_ASV3818	Absence	Presence
5	Melioribacter_ASV1343	Melioribacter_ASV1343	Absence	Presence
6	Unclassified_Balneolaceae_43_ASV2794	Unclassified_Balneolaceae_43_ASV2794	Absence	Presence
7	Unclassified_Balneolaceae_76_ASV2830	Unclassified_Balneolaceae_76_ASV2830	Absence	Presence
8	Unclassified_Balneolaceae_61_ASV2814	Unclassified_Balneolaceae_61_ASV2814	Absence	Presence
9	Unclassified_Balneolaceae_26_ASV2775	Unclassified_Balneolaceae_26_ASV2775	Absence	Presence
10	Unclassified_Balneolaceae_49_ASV2800	Unclassified_Balneolaceae_49_ASV2800	Absence	Presence
11	Unclassified_Balneolaceae_55_ASV2807	Unclassified_Balneolaceae_55_ASV2807	Absence	Presence
12	Unclassified_Balneolaceae_36_ASV2786	Unclassified_Balneolaceae_36_ASV2786	Absence	Presence
13	Unclassified_Balneolaceae_50_ASV2802	Unclassified_Balneolaceae_50_ASV2802	Absence	Presence
14	Unclassified_Balneolaceae_14_ASV2762	Unclassified_Balneolaceae_14_ASV2762	Absence	Presence
15	Unclassified_Balneolaceae_67_ASV2820	Unclassified_Balneolaceae_67_ASV2820	Absence	Presence
16	Unclassified_Balneolaceae_6_ASV2812	Unclassified_Balneolaceae_6_ASV2812	Absence	Presence
17	MAT-CR-P4-C12_ASV1337	MAT-CR-P4-C12_ASV1337	Absence	Presence
18	Unclassified_Balneolaceae_35_ASV2785	Unclassified_Balneolaceae_35_ASV2785	Absence	Presence
19	Unclassified_Balneolaceae_34_ASV2784	Unclassified_Balneolaceae_34_ASV2784	Absence	Presence
20	Unclassified_vadinHA49_17_ASV4875	Unclassified_vadinHA49_17_ASV4875	Absence	Presence
21	Unclassified_Bacteroidia_1_ASV2751	Unclassified_Bacteroidia_1_ASV2751	Absence	Presence
22	Unclassified_Sphingobacteriaceae_2_ASV4743	Unclassified_Sphingobacteriaceae_2_ASV4743	Absence	Presence
23	Sphingobacterium_ASV2115	Sphingobacterium_ASV2115	Absence	Presence
24	Sphingobacterium_ASV2114	Sphingobacterium_ASV2114	Absence	Presence
25	Pedobacter_ASV1614	Pedobacter_ASV1614	Absence	Presence
26	Pedobacter_ASV1613	Pedobacter_ASV1613	Absence	Presence
27	Unclassified_Cryomorphaceae_4_ASV3148	Unclassified_Cryomorphaceae_4_ASV3148	Absence	Presence
28	Unclassified_NS9_marine_group_1_ASV3987	Unclassified_NS9_marine_group_1_ASV3987	Absence	Presence
29	Unclassified_KD3-93_ASV1135	Unclassified_KD3-93_ASV1135	Absence	Presence
30	Unclassified_Bacteroidales_2_ASV2716	Unclassified_Bacteroidales_2_ASV2716	Absence	Presence
31	Paludibacter_ASV1581	Paludibacter_ASV1581	Absence	Presence
32	Unclassified_Marinilabiliaceae_4_ASV3802	Unclassified_Marinilabiliaceae_4_ASV3802	Absence	Presence
33	Unclassified_Lentimicrobiaceae_15_ASV3757	Unclassified_Lentimicrobiaceae_15_ASV3757	Absence	Presence
34	Unclassified_Lentimicrobiaceae_9_ASV3766	Unclassified_Lentimicrobiaceae_9_ASV3766	Absence	Presence
35	Unclassified_Lentimicrobiaceae_1_ASV3751	Unclassified_Lentimicrobiaceae_1_ASV3751	Absence	Presence
36	Unclassified_Sphingobacteriaceae_1_ASV4742	Unclassified_Sphingobacteriaceae_1_ASV4742	Absence	Presence
37	Taibaiella_ASV2321	Taibaiella_ASV2321	Absence	Presence
38	Unclassified_Saprospiraceae_53_ASV4574	Unclassified_Saprospiraceae_53_ASV4574	Absence	Presence
39	Unclassified_Saprospiraceae_20_ASV4538	Unclassified_Saprospiraceae_20_ASV4538	Absence	Presence
40	Unclassified_Saprospiraceae_12_ASV4529	Unclassified_Saprospiraceae_12_ASV4529	Absence	Presence
41	Unclassified_Saprospiraceae_9_ASV4582	Unclassified_Saprospiraceae_9_ASV4582	Absence	Presence
42	Phaeodactylibacter_ASV1643	Phaeodactylibacter_ASV1643	Absence	Presence
43	Phaeodactylibacter_ASV1636	Phaeodactylibacter_ASV1636	Absence	Presence
44	Phaeodactylibacter_ASV1634	Phaeodactylibacter_ASV1634	Absence	Presence
45	Unclassified_Saprospiraceae_29_ASV4547	Unclassified_Saprospiraceae_29_ASV4547	Absence	Presence
46	Unclassified_Saprospiraceae_34_ASV4553	Unclassified_Saprospiraceae_34_ASV4553	Absence	Presence
47	Unclassified_Saprospiraceae_32_ASV4551	Unclassified_Saprospiraceae_32_ASV4551	Absence	Presence
48	Unclassified_Saprospiraceae_1_ASV4526	Unclassified_Saprospiraceae_1_ASV4526	Absence	Presence
49	Unclassified_Saprospiraceae_46_ASV4566	Unclassified_Saprospiraceae_46_ASV4566	Absence	Presence
50	Unclassified_Saprospiraceae_37_ASV4556	Unclassified_Saprospiraceae_37_ASV4556	Absence	Presence
51	Unclassified_Saprospiraceae_4_ASV4559	Unclassified_Saprospiraceae_4_ASV4559	Absence	Presence
52	Unclassified_Saprospiraceae_2_ASV4537	Unclassified_Saprospiraceae_2_ASV4537	Absence	Presence
53	Unclassified_Saprospiraceae_33_ASV4552	Unclassified_Saprospiraceae_33_ASV4552	Absence	Presence
54	Unclassified_Saprospiraceae_49_ASV4569	Unclassified_Saprospiraceae_49_ASV4569	Absence	Presence
55	OLB8_ASV1545	OLB8_ASV1545	Absence	Presence
56	Terrimonas_ASV2342	Terrimonas_ASV2342	Absence	Presence
57	Cnuella_ASV629	Cnuella_ASV629	Absence	Presence
58	Cnuella_ASV628	Cnuella_ASV628	Absence	Presence
59	Cnuella_ASV627	Cnuella_ASV627	Absence	Presence
60	Unclassified_Chitinophagaceae_2_ASV3021	Unclassified_Chitinophagaceae_2_ASV3021	Absence	Presence
61	Cnuella_ASV630	Cnuella_ASV630	Absence	Presence
62	Flavisolibacter_ASV936	Flavisolibacter_ASV936	Absence	Presence
63	Unclassified_Chitinophagaceae_7_ASV3030	Unclassified_Chitinophagaceae_7_ASV3030	Absence	Presence
64	Unclassified_Chitinophagaceae_20_ASV3022	Unclassified_Chitinophagaceae_20_ASV3022	Absence	Presence
65	Flavisolibacter_ASV944	Flavisolibacter_ASV944	Absence	Presence
66	Flavisolibacter_ASV939	Flavisolibacter_ASV939	Absence	Presence
67	Flavisolibacter_ASV937	Flavisolibacter_ASV937	Absence	Presence
68	Flavisolibacter_ASV946	Flavisolibacter_ASV946	Absence	Presence
69	Flavisolibacter_ASV941	Flavisolibacter_ASV941	Absence	Presence
70	Flavisolibacter_ASV934	Flavisolibacter_ASV934	Absence	Presence
71	Flavisolibacter_ASV938	Flavisolibacter_ASV938	Absence	Presence
72	Unclassified_Chitinophagaceae_4_ASV3027	Unclassified_Chitinophagaceae_4_ASV3027	Absence	Presence
73	Unclassified_Chitinophagaceae_11_ASV3012	Unclassified_Chitinophagaceae_11_ASV3012	Absence	Presence
74	Unclassified_Chitinophagaceae_21_ASV3023	Unclassified_Chitinophagaceae_21_ASV3023	Absence	Presence
75	Unclassified_Chitinophagaceae_23_ASV3025	Unclassified_Chitinophagaceae_23_ASV3025	Absence	Presence
76	Unclassified_Saprospiraceae_15_ASV4532	Unclassified_Saprospiraceae_15_ASV4532	Absence	Presence
77	Fluviicola_ASV961	Fluviicola_ASV961	Absence	Presence
78	Brumimicrobium_ASV375	Brumimicrobium_ASV375	Absence	Presence
79	Brumimicrobium_ASV377	Brumimicrobium_ASV377	Absence	Presence
80	Unclassified_AKYH767_1_ASV2533	Unclassified_AKYH767_1_ASV2533	Absence	Presence
81	Unclassified_SB-5_3_ASV4618	Unclassified_SB-5_3_ASV4618	Absence	Presence
82	Unclassified_SB-5_16_ASV4611	Unclassified_SB-5_16_ASV4611	Absence	Presence
83	Unclassified_Bacteroidetes_BD2-2_3_ASV2742	Unclassified_Bacteroidetes_BD2-2_3_ASV2742	Absence	Presence
84	Unclassified_Bacteroidetes_BD2-2_11_ASV2726	Unclassified_Bacteroidetes_BD2-2_11_ASV2726	Absence	Presence
85	Unclassified_Bacteroidetes_BD2-2_23_ASV2739	Unclassified_Bacteroidetes_BD2-2_23_ASV2739	Absence	Presence
86	Unclassified_Bacteroidetes_BD2-2_13_ASV2728	Unclassified_Bacteroidetes_BD2-2_13_ASV2728	Absence	Presence
87	Unclassified_Bacteroidetes_BD2-2_24_ASV2740	Unclassified_Bacteroidetes_BD2-2_24_ASV2740	Absence	Presence
88	Unclassified_Bacteroidetes_BD2-2_2_ASV2735	Unclassified_Bacteroidetes_BD2-2_2_ASV2735	Absence	Presence
89	Unclassified_Bacteroidetes_BD2-2_15_ASV2730	Unclassified_Bacteroidetes_BD2-2_15_ASV2730	Absence	Presence
90	Unclassified_Bacteroidales_6_ASV2720	Unclassified_Bacteroidales_6_ASV2720	Absence	Presence
91	Unclassified_Prolixibacteraceae_2_ASV4235	Unclassified_Prolixibacteraceae_2_ASV4235	Absence	Presence
92	Sunxiuqinia_ASV2283	Sunxiuqinia_ASV2283	Absence	Presence
93	Unclassified_Bacteroidales_13_ASV2713	Unclassified_Bacteroidales_13_ASV2713	Absence	Presence
94	Unclassified_Marinilabiliaceae_2_ASV3800	Unclassified_Marinilabiliaceae_2_ASV3800	Absence	Presence
95	Unclassified_Flavobacteriaceae_20_ASV3404	Unclassified_Flavobacteriaceae_20_ASV3404	Absence	Presence
96	Unclassified_Flavobacteriaceae_7_ASV3448	Unclassified_Flavobacteriaceae_7_ASV3448	Absence	Presence
97	Unclassified_Flavobacteriaceae_43_ASV3429	Unclassified_Flavobacteriaceae_43_ASV3429	Absence	Presence
98	Pseudofulvibacter_ASV1743	Pseudofulvibacter_ASV1743	Absence	Presence
99	Unclassified_Flavobacteriaceae_25_ASV3409	Unclassified_Flavobacteriaceae_25_ASV3409	Absence	Presence
100	Unclassified_Flavobacteriaceae_3_ASV3414	Unclassified_Flavobacteriaceae_3_ASV3414	Absence	Presence
101	Unclassified_Flavobacteriaceae_1_ASV3392	Unclassified_Flavobacteriaceae_1_ASV3392	Absence	Presence
102	Unclassified_Flavobacteriaceae_56_ASV3443	Unclassified_Flavobacteriaceae_56_ASV3443	Absence	Presence
103	Psychroflexus_ASV1790	Psychroflexus_ASV1790	Absence	Presence
104	Psychroflexus_ASV1789	Psychroflexus_ASV1789	Absence	Presence
105	Unclassified_Flavobacteriaceae_38_ASV3423	Unclassified_Flavobacteriaceae_38_ASV3423	Absence	Presence
106	Unclassified_Flavobacteriaceae_37_ASV3422	Unclassified_Flavobacteriaceae_37_ASV3422	Absence	Presence
107	Gramella_ASV1032	Gramella_ASV1032	Absence	Presence
108	Gramella_ASV1034	Gramella_ASV1034	Absence	Presence
109	Unclassified_Flavobacteriaceae_29_ASV3413	Unclassified_Flavobacteriaceae_29_ASV3413	Absence	Presence
110	Unclassified_Flavobacteriaceae_12_ASV3395	Unclassified_Flavobacteriaceae_12_ASV3395	Absence	Presence
111	Unclassified_Flavobacteriaceae_23_ASV3407	Unclassified_Flavobacteriaceae_23_ASV3407	Absence	Presence
112	Psychroflexus_ASV1793	Psychroflexus_ASV1793	Absence	Presence
113	NS5_marine_group_ASV1520	NS5_marine_group_ASV1520	Absence	Presence
114	NS5_marine_group_ASV1521	NS5_marine_group_ASV1521	Absence	Presence
115	Unclassified_Flavobacteriaceae_48_ASV3434	Unclassified_Flavobacteriaceae_48_ASV3434	Absence	Presence
116	Unclassified_Flavobacteriaceae_4_ASV3425	Unclassified_Flavobacteriaceae_4_ASV3425	Absence	Presence
117	Unclassified_Flavobacteriaceae_26_ASV3410	Unclassified_Flavobacteriaceae_26_ASV3410	Absence	Presence
118	Unclassified_Flavobacteriaceae_47_ASV3433	Unclassified_Flavobacteriaceae_47_ASV3433	Absence	Presence
119	Unclassified_Flavobacteriaceae_10_ASV3393	Unclassified_Flavobacteriaceae_10_ASV3393	Absence	Presence
120	Unclassified_Flavobacteriaceae_32_ASV3417	Unclassified_Flavobacteriaceae_32_ASV3417	Absence	Presence
121	Bergeyella_ASV312	Bergeyella_ASV312	Absence	Presence
122	Bergeyella_ASV311	Bergeyella_ASV311	Absence	Presence
123	Moheibacter_ASV1407	Moheibacter_ASV1407	Absence	Presence
124	Unclassified_Weeksellaceae_6_ASV4939	Unclassified_Weeksellaceae_6_ASV4939	Absence	Presence
125	Unclassified_Weeksellaceae_3_ASV4936	Unclassified_Weeksellaceae_3_ASV4936	Absence	Presence
126	Myroides_ASV1459	Myroides_ASV1459	Absence	Presence
127	Flavobacterium_ASV949	Flavobacterium_ASV949	Absence	Presence
128	Ulvibacter_ASV2410	Ulvibacter_ASV2410	Absence	Presence
129	Aequorivita_ASV95	Aequorivita_ASV95	Absence	Presence
130	Unclassified_Flavobacteriaceae_44_ASV3430	Unclassified_Flavobacteriaceae_44_ASV3430	Absence	Presence
131	Gramella_ASV1031	Gramella_ASV1031	Absence	Presence
132	Anaerophaga_ASV192	Anaerophaga_ASV192	Absence	Presence
133	Alloprevotella_ASV140	Alloprevotella_ASV140	Absence	Presence
134	Alloprevotella_ASV139	Alloprevotella_ASV139	Absence	Presence
135	Prevotella_ASV1713	Prevotella_ASV1713	Absence	Presence
136	Proteiniphilum_ASV1729	Proteiniphilum_ASV1729	Absence	Presence
137	Bacteroides_ASV274	Bacteroides_ASV274	Absence	Presence
138	Unclassified_Muribaculaceae_2_ASV3907	Unclassified_Muribaculaceae_2_ASV3907	Absence	Presence
139	Unclassified_Muribaculaceae_3_ASV3908	Unclassified_Muribaculaceae_3_ASV3908	Absence	Presence
140	Unclassified_Muribaculaceae_1_ASV3906	Unclassified_Muribaculaceae_1_ASV3906	Absence	Presence
141	Unclassified_Cyclobacteriaceae_5_ASV3199	Unclassified_Cyclobacteriaceae_5_ASV3199	Absence	Presence
142	Unclassified_Cyclobacteriaceae_9_ASV3203	Unclassified_Cyclobacteriaceae_9_ASV3203	Absence	Presence
143	Unclassified_Cytophagales_1_ASV3204	Unclassified_Cytophagales_1_ASV3204	Absence	Presence
144	Unclassified_Cytophagales_10_ASV3205	Unclassified_Cytophagales_10_ASV3205	Absence	Presence
145	Unclassified_Cytophagales_5_ASV3210	Unclassified_Cytophagales_5_ASV3210	Absence	Presence
146	Hymenobacter_ASV1108	Hymenobacter_ASV1108	Absence	Presence
147	Hymenobacter_ASV1100	Hymenobacter_ASV1100	Absence	Presence
148	Adhaeribacter_ASV91	Adhaeribacter_ASV91	Absence	Presence
149	Adhaeribacter_ASV92	Adhaeribacter_ASV92	Absence	Presence
150	Hymenobacter_ASV1102	Hymenobacter_ASV1102	Absence	Presence
151	Rhodocytophaga_ASV1839	Rhodocytophaga_ASV1839	Absence	Presence
152	Unclassified_Cytophagales_2_ASV3207	Unclassified_Cytophagales_2_ASV3207	Absence	Presence
153	Unclassified_Cytophagales_8_ASV3213	Unclassified_Cytophagales_8_ASV3213	Absence	Presence
154	Algoriphagus_ASV120	Algoriphagus_ASV120	Absence	Presence
155	Algoriphagus_ASV123	Algoriphagus_ASV123	Absence	Presence
156	Larkinella_ASV1184	Larkinella_ASV1184	Absence	Presence
157	Unclassified_Spirosomaceae_2_ASV4779	Unclassified_Spirosomaceae_2_ASV4779	Absence	Presence
158	OLB12_ASV1542	OLB12_ASV1542	Absence	Presence
159	Unclassified_Cyclobacteriaceae_14_ASV3177	Unclassified_Cyclobacteriaceae_14_ASV3177	Absence	Presence
160	Unclassified_Cyclobacteriaceae_7_ASV3201	Unclassified_Cyclobacteriaceae_7_ASV3201	Absence	Presence
161	Unclassified_Cyclobacteriaceae_23_ASV3187	Unclassified_Cyclobacteriaceae_23_ASV3187	Absence	Presence
162	Unclassified_Cyclobacteriaceae_30_ASV3195	Unclassified_Cyclobacteriaceae_30_ASV3195	Absence	Presence
163	Unclassified_Rhodothermaceae_22_ASV4473	Unclassified_Rhodothermaceae_22_ASV4473	Absence	Presence
164	Unclassified_Rhodothermaceae_5_ASV4477	Unclassified_Rhodothermaceae_5_ASV4477	Absence	Presence
165	Salinibacter_ASV1986	Salinibacter_ASV1986	Absence	Presence
166	Unclassified_Rhodothermaceae_12_ASV4462	Unclassified_Rhodothermaceae_12_ASV4462	Absence	Presence
167	Unclassified_Rhodothermaceae_7_ASV4479	Unclassified_Rhodothermaceae_7_ASV4479	Absence	Presence
168	Unclassified_Rhodothermaceae_13_ASV4463	Unclassified_Rhodothermaceae_13_ASV4463	Absence	Presence
169	Unclassified_PAUC34f_ASV1609	Unclassified_PAUC34f_ASV1609	Absence	Presence
170	Unclassified_WCHB1-41_10_ASV4913	Unclassified_WCHB1-41_10_ASV4913	Absence	Presence
171	Unclassified_WCHB1-41_1_ASV4912	Unclassified_WCHB1-41_1_ASV4912	Absence	Presence
172	Unclassified_Subgroup_17_ASV2269	Unclassified_Subgroup_17_ASV2269	Absence	Presence
173	Unclassified_0319-6G20_4_ASV2422	Unclassified_0319-6G20_4_ASV2422	Absence	Presence
174	Unclassified_0319-6G20_3_ASV2421	Unclassified_0319-6G20_3_ASV2421	Absence	Presence
175	Unclassified_Spirochaetaceae_17_ASV4769	Unclassified_Spirochaetaceae_17_ASV4769	Absence	Presence
176	Candidatus_Omnitrophus_ASV450	Candidatus_Omnitrophus_ASV450	Absence	Presence
177	Unclassified_Spirochaetaceae_11_ASV4763	Unclassified_Spirochaetaceae_11_ASV4763	Absence	Presence
178	Spirochaeta_ASV2148	Spirochaeta_ASV2148	Absence	Presence
179	Spirochaeta_2_ASV2198	Spirochaeta_2_ASV2198	Absence	Presence
180	Spirochaeta_2_ASV2207	Spirochaeta_2_ASV2207	Absence	Presence
181	Spirochaeta_2_ASV2175	Spirochaeta_2_ASV2175	Absence	Presence
182	Salinispira_ASV2025	Salinispira_ASV2025	Absence	Presence
183	Sediminispirochaeta_ASV2060	Sediminispirochaeta_ASV2060	Absence	Presence
184	Chlamydia_ASV509	Chlamydia_ASV509	Absence	Presence
185	Unclassified_Simkaniaceae_4_ASV4728	Unclassified_Simkaniaceae_4_ASV4728	Absence	Presence
186	Unclassified_Simkaniaceae_2_ASV4726	Unclassified_Simkaniaceae_2_ASV4726	Absence	Presence
187	Unclassified_Pla4_lineage_3_ASV4176	Unclassified_Pla4_lineage_3_ASV4176	Absence	Presence
188	Unclassified_Planctomycetota_9_ASV4220	Unclassified_Planctomycetota_9_ASV4220	Absence	Presence
189	Unclassified_Planctomycetota_12_ASV4207	Unclassified_Planctomycetota_12_ASV4207	Absence	Presence
190	Unclassified_SG8-4_2_ASV4716	Unclassified_SG8-4_2_ASV4716	Absence	Presence
191	Unclassified_SG8-4_4_ASV4718	Unclassified_SG8-4_4_ASV4718	Absence	Presence
192	CL500-3_ASV561	CL500-3_ASV561	Absence	Presence
193	SM1A02_ASV2093	SM1A02_ASV2093	Absence	Presence
194	Unclassified_WD2101_soil_group_1_ASV4922	Unclassified_WD2101_soil_group_1_ASV4922	Absence	Presence
195	Unclassified_WD2101_soil_group_3_ASV4924	Unclassified_WD2101_soil_group_3_ASV4924	Absence	Presence
196	Unclassified_WD2101_soil_group_6_ASV4927	Unclassified_WD2101_soil_group_6_ASV4927	Absence	Presence
197	Unclassified_Phycisphaeraceae_8_ASV4121	Unclassified_Phycisphaeraceae_8_ASV4121	Absence	Presence
198	Unclassified_Phycisphaeraceae_16_ASV4110	Unclassified_Phycisphaeraceae_16_ASV4110	Absence	Presence
199	Unclassified_Phycisphaeraceae_14_ASV4108	Unclassified_Phycisphaeraceae_14_ASV4108	Absence	Presence
200	Unclassified_AKAU3564_sediment_group_2_ASV2523	Unclassified_AKAU3564_sediment_group_2_ASV2523	Absence	Presence
201	Unclassified_mle1-8_3_ASV3889	Unclassified_mle1-8_3_ASV3889	Absence	Presence
202	Unclassified_Pla1_lineage_2_ASV4154	Unclassified_Pla1_lineage_2_ASV4154	Absence	Presence
203	Unclassified_Pla1_lineage_1_ASV4153	Unclassified_Pla1_lineage_1_ASV4153	Absence	Presence
204	Unclassified_CCM11a_3_ASV3001	Unclassified_CCM11a_3_ASV3001	Absence	Presence
205	Unclassified_Gemmataceae_8_ASV3569	Unclassified_Gemmataceae_8_ASV3569	Absence	Presence
206	Unclassified_Gemmataceae_3_ASV3564	Unclassified_Gemmataceae_3_ASV3564	Absence	Presence
207	Unclassified_Gemmataceae_14_ASV3560	Unclassified_Gemmataceae_14_ASV3560	Absence	Presence
208	Unclassified_Gemmataceae_16_ASV3562	Unclassified_Gemmataceae_16_ASV3562	Absence	Presence
209	Unclassified_Isosphaeraceae_3_ASV3645	Unclassified_Isosphaeraceae_3_ASV3645	Absence	Presence
210	Unclassified_Isosphaeraceae_9_ASV3651	Unclassified_Isosphaeraceae_9_ASV3651	Absence	Presence
211	Tundrisphaera_ASV2392	Tundrisphaera_ASV2392	Absence	Presence
212	Unclassified_Gemmataceae_15_ASV3561	Unclassified_Gemmataceae_15_ASV3561	Absence	Presence
213	Unclassified_Gemmataceae_13_ASV3559	Unclassified_Gemmataceae_13_ASV3559	Absence	Presence
214	Unclassified_Gemmataceae_1_ASV3555	Unclassified_Gemmataceae_1_ASV3555	Absence	Presence
215	Gemmata_ASV1003	Gemmata_ASV1003	Absence	Presence
216	Unclassified_Planctomycetes_1_ASV4202	Unclassified_Planctomycetes_1_ASV4202	Absence	Presence
217	Unclassified_Planctomycetales_6_ASV4198	Unclassified_Planctomycetales_6_ASV4198	Absence	Presence
218	Unclassified_Gemmataceae_5_ASV3566	Unclassified_Gemmataceae_5_ASV3566	Absence	Presence
219	SH-PL14_ASV2083	SH-PL14_ASV2083	Absence	Presence
220	Unclassified_Planctomycetales_18_ASV4192	Unclassified_Planctomycetales_18_ASV4192	Absence	Presence
221	SH-PL14_ASV2085	SH-PL14_ASV2085	Absence	Presence
222	Unclassified_Gimesiaceae_2_ASV3586	Unclassified_Gimesiaceae_2_ASV3586	Absence	Presence
223	Unclassified_Gimesiaceae_3_ASV3587	Unclassified_Gimesiaceae_3_ASV3587	Absence	Presence
224	Unclassified_Planctomycetales_10_ASV4184	Unclassified_Planctomycetales_10_ASV4184	Absence	Presence
225	Unclassified_Pirellulaceae_28_ASV4145	Unclassified_Pirellulaceae_28_ASV4145	Absence	Presence
226	Pir4_lineage_ASV1681	Pir4_lineage_ASV1681	Absence	Presence
227	Pir4_lineage_ASV1680	Pir4_lineage_ASV1680	Absence	Presence
228	Pir4_lineage_ASV1678	Pir4_lineage_ASV1678	Absence	Presence
229	Unclassified_Pirellulaceae_5_ASV4148	Unclassified_Pirellulaceae_5_ASV4148	Absence	Presence
230	Blastopirellula_ASV340	Blastopirellula_ASV340	Absence	Presence
231	Pirellula_ASV1689	Pirellula_ASV1689	Absence	Presence
232	Pirellula_ASV1695	Pirellula_ASV1695	Absence	Presence
233	Pirellula_ASV1691	Pirellula_ASV1691	Absence	Presence
234	Rhodopirellula_ASV1861	Rhodopirellula_ASV1861	Absence	Presence
235	Pirellula_ASV1692	Pirellula_ASV1692	Absence	Presence
236	Pirellula_ASV1686	Pirellula_ASV1686	Absence	Presence
237	Unclassified_Pirellulaceae_7_ASV4150	Unclassified_Pirellulaceae_7_ASV4150	Absence	Presence
238	Unclassified_Pirellulaceae_22_ASV4139	Unclassified_Pirellulaceae_22_ASV4139	Absence	Presence
239	Unclassified_Pirellulaceae_16_ASV4132	Unclassified_Pirellulaceae_16_ASV4132	Absence	Presence
240	Unclassified_Pirellulaceae_20_ASV4137	Unclassified_Pirellulaceae_20_ASV4137	Absence	Presence
241	Unclassified_Pirellulaceae_27_ASV4144	Unclassified_Pirellulaceae_27_ASV4144	Absence	Presence
242	Unclassified_Pirellulaceae_10_ASV4126	Unclassified_Pirellulaceae_10_ASV4126	Absence	Presence
243	Unclassified_Pirellulaceae_26_ASV4143	Unclassified_Pirellulaceae_26_ASV4143	Absence	Presence
244	Rhodopirellula_ASV1859	Rhodopirellula_ASV1859	Absence	Presence
245	Unclassified_OM190_5_ASV4010	Unclassified_OM190_5_ASV4010	Absence	Presence
246	Unclassified_OM190_4_ASV4009	Unclassified_OM190_4_ASV4009	Absence	Presence
247	Unclassified_Pla4_lineage_4_ASV4177	Unclassified_Pla4_lineage_4_ASV4177	Absence	Presence
248	Unclassified_BD7-11_5_ASV2875	Unclassified_BD7-11_5_ASV2875	Absence	Presence
249	Unclassified_BD7-11_2_ASV2872	Unclassified_BD7-11_2_ASV2872	Absence	Presence
250	Unclassified_Subgroup_9_1_ASV4817	Unclassified_Subgroup_9_1_ASV4817	Absence	Presence
251	Unclassified_Vicinamibacteraceae_6_ASV4902	Unclassified_Vicinamibacteraceae_6_ASV4902	Absence	Presence
252	Unclassified_Vicinamibacteraceae_1_ASV4897	Unclassified_Vicinamibacteraceae_1_ASV4897	Absence	Presence
253	Unclassified_Vicinamibacterales_3_ASV4906	Unclassified_Vicinamibacterales_3_ASV4906	Absence	Presence
254	Unclassified_Vicinamibacterales_5_ASV4908	Unclassified_Vicinamibacterales_5_ASV4908	Absence	Presence
255	Vicinamibacter_ASV5063	Vicinamibacter_ASV5063	Absence	Presence
256	Luteitalea_ASV1281	Luteitalea_ASV1281	Absence	Presence
257	Unclassified_Vicinamibacteraceae_1_ASV4896	Unclassified_Vicinamibacteraceae_1_ASV4896	Absence	Presence
258	Unclassified_Vicinamibacteraceae_7_ASV4903	Unclassified_Vicinamibacteraceae_7_ASV4903	Absence	Presence
259	Unclassified_Vicinamibacteraceae_2_ASV4898	Unclassified_Vicinamibacteraceae_2_ASV4898	Absence	Presence
260	Coraliomargarita_ASV645	Coraliomargarita_ASV645	Absence	Presence
261	Verruc-01_ASV5047	Verruc-01_ASV5047	Absence	Presence
262	Opitutus_ASV1550	Opitutus_ASV1550	Absence	Presence
263	Opitutus_ASV1551	Opitutus_ASV1551	Absence	Presence
264	Unclassified_Latescibacteraceae_3_ASV3726	Unclassified_Latescibacteraceae_3_ASV3726	Absence	Presence
265	Unclassified_Vicinamibacterales_7_ASV4910	Unclassified_Vicinamibacterales_7_ASV4910	Absence	Presence
266	Unclassified_Lentisphaeria_1_ASV3767	Unclassified_Lentisphaeria_1_ASV3767	Absence	Presence
267	Unclassified_SS1-B-02-17_5_ASV4790	Unclassified_SS1-B-02-17_5_ASV4790	Absence	Presence
268	Chthoniobacter_ASV551	Chthoniobacter_ASV551	Absence	Presence
269	Unclassified_Methylacidiphilaceae_5_ASV3831	Unclassified_Methylacidiphilaceae_5_ASV3831	Absence	Presence
270	Ellin517_ASV858	Ellin517_ASV858	Absence	Presence
271	SH3-11_ASV2077	SH3-11_ASV2077	Absence	Presence
272	Luteolibacter_ASV1287	Luteolibacter_ASV1287	Absence	Presence
273	Luteolibacter_ASV1283	Luteolibacter_ASV1283	Absence	Presence
274	Luteolibacter_ASV1289	Luteolibacter_ASV1289	Absence	Presence
275	Luteolibacter_ASV1291	Luteolibacter_ASV1291	Absence	Presence
276	Rubritalea_ASV1942	Rubritalea_ASV1942	Absence	Presence
277	Prosthecobacter_ASV1727	Prosthecobacter_ASV1727	Absence	Presence
278	Unclassified_DEV007_5_ASV3297	Unclassified_DEV007_5_ASV3297	Absence	Presence
279	FukuN18_freshwater_group_ASV968	FukuN18_freshwater_group_ASV968	Absence	Presence
280	LD29_ASV1196	LD29_ASV1196	Absence	Presence
281	LD29_ASV1202	LD29_ASV1202	Absence	Presence
282	LD29_ASV1199	LD29_ASV1199	Absence	Presence
283	Chthoniobacter_ASV555	Chthoniobacter_ASV555	Absence	Presence
284	Unclassified_Chthoniobacterales_1_ASV3072	Unclassified_Chthoniobacterales_1_ASV3072	Absence	Presence
285	Terrimicrobium_ASV2334	Terrimicrobium_ASV2334	Absence	Presence
286	Unclassified_Pirellulaceae_1_ASV4125	Unclassified_Pirellulaceae_1_ASV4125	Absence	Presence
287	Unclassified_vadinHA49_6_ASV4883	Unclassified_vadinHA49_6_ASV4883	Absence	Presence
288	Unclassified_vadinHA49_18_ASV4876	Unclassified_vadinHA49_18_ASV4876	Absence	Presence
289	Unclassified_Acidobacteriota_8_ASV2492	Unclassified_Acidobacteriota_8_ASV2492	Absence	Presence
290	Unclassified_DS-100_2_ASV3309	Unclassified_DS-100_2_ASV3309	Absence	Presence
291	Unclassified_DS-100_1_ASV3308	Unclassified_DS-100_1_ASV3308	Absence	Presence
292	Unclassified_Latescibacterota_1_ASV3733	Unclassified_Latescibacterota_1_ASV3733	Absence	Presence
293	Unclassified_Thermodesulfovibrionia_2_ASV4856	Unclassified_Thermodesulfovibrionia_2_ASV4856	Absence	Presence
294	RB41_ASV1804	RB41_ASV1804	Absence	Presence
295	Unclassified_Blastocatellaceae_4_ASV2915	Unclassified_Blastocatellaceae_4_ASV2915	Absence	Presence
296	Blastocatella_ASV323	Blastocatella_ASV323	Absence	Presence
297	Unclassified_Blastocatellaceae_5_ASV2916	Unclassified_Blastocatellaceae_5_ASV2916	Absence	Presence
298	Unclassified_Blastocatellaceae_1_ASV2912	Unclassified_Blastocatellaceae_1_ASV2912	Absence	Presence
299	RB41_ASV1801	RB41_ASV1801	Absence	Presence
300	RB41_ASV1802	RB41_ASV1802	Absence	Presence
301	RB41_ASV1806	RB41_ASV1806	Absence	Presence
302	RB41_ASV1808	RB41_ASV1808	Absence	Presence
303	Unclassified_JG30-KF-CM66_3_ASV3663	Unclassified_JG30-KF-CM66_3_ASV3663	Absence	Presence
304	Unclassified_TK10_4_ASV4864	Unclassified_TK10_4_ASV4864	Absence	Presence
305	Unclassified_SAR324_clade(Marine_group_B)_11_ASV4591	Unclassified_SAR324_clade(Marine_group_B)_11_ASV4591	Absence	Presence
306	Unclassified_Armatimonadota_2_ASV2658	Unclassified_Armatimonadota_2_ASV2658	Absence	Presence
307	Unclassified_AKYG1722_ASV107	Unclassified_AKYG1722_ASV107	Absence	Presence
308	Unclassified_JG30-KF-CM45_3_ASV3658	Unclassified_JG30-KF-CM45_3_ASV3658	Absence	Presence
309	Unclassified_JG30-KF-CM45_2_ASV3657	Unclassified_JG30-KF-CM45_2_ASV3657	Absence	Presence
310	Candidatus_Chlorothrix_ASV420	Candidatus_Chlorothrix_ASV420	Absence	Presence
311	Candidatus_Chlorothrix_ASV428	Candidatus_Chlorothrix_ASV428	Absence	Presence
312	Candidatus_Chloroploca_ASV418	Candidatus_Chloroploca_ASV418	Absence	Presence
313	Unclassified_Ardenticatenaceae_1_ASV2632	Unclassified_Ardenticatenaceae_1_ASV2632	Absence	Presence
314	Unclassified_SBR1031_72_ASV4695	Unclassified_SBR1031_72_ASV4695	Absence	Presence
315	Unclassified_SBR1031_65_ASV4687	Unclassified_SBR1031_65_ASV4687	Absence	Presence
316	Unclassified_A4b_16_ASV2437	Unclassified_A4b_16_ASV2437	Absence	Presence
317	Unclassified_SBR1031_74_ASV4697	Unclassified_SBR1031_74_ASV4697	Absence	Presence
318	Unclassified_AKIW781_2_ASV2532	Unclassified_AKIW781_2_ASV2532	Absence	Presence
319	Unclassified_AKIW781_1_ASV2531	Unclassified_AKIW781_1_ASV2531	Absence	Presence
320	Unclassified_SBR1031_1_ASV4626	Unclassified_SBR1031_1_ASV4626	Absence	Presence
321	Unclassified_A4b_31_ASV2454	Unclassified_A4b_31_ASV2454	Absence	Presence
322	Unclassified_A4b_5_ASV2456	Unclassified_A4b_5_ASV2456	Absence	Presence
323	Unclassified_A4b_2_ASV2441	Unclassified_A4b_2_ASV2441	Absence	Presence
324	Unclassified_Caldilineaceae_2_ASV2964	Unclassified_Caldilineaceae_2_ASV2964	Absence	Presence
325	Unclassified_SBR1031_75_ASV4698	Unclassified_SBR1031_75_ASV4698	Absence	Presence
326	Unclassified_SBR1031_24_ASV4642	Unclassified_SBR1031_24_ASV4642	Absence	Presence
327	Unclassified_SBR1031_47_ASV4667	Unclassified_SBR1031_47_ASV4667	Absence	Presence
328	Unclassified_RBG-13-54-9_ASV1809	Unclassified_RBG-13-54-9_ASV1809	Absence	Presence
329	Unclassified_Ardenticatenales_17_ASV2641	Unclassified_Ardenticatenales_17_ASV2641	Absence	Presence
330	Unclassified_Ardenticatenales_12_ASV2636	Unclassified_Ardenticatenales_12_ASV2636	Absence	Presence
331	Unclassified_Anaerolineaceae_28_ASV2605	Unclassified_Anaerolineaceae_28_ASV2605	Absence	Presence
332	Unclassified_Anaerolineaceae_10_ASV2586	Unclassified_Anaerolineaceae_10_ASV2586	Absence	Presence
333	Unclassified_Anaerolineaceae_4_ASV2617	Unclassified_Anaerolineaceae_4_ASV2617	Absence	Presence
334	Unclassified_SAR202_clade_2_ASV4584	Unclassified_SAR202_clade_2_ASV4584	Absence	Presence
335	Unclassified_SAR202_clade_1_ASV4583	Unclassified_SAR202_clade_1_ASV4583	Absence	Presence
336	Unclassified_Dehalococcoidia_1_ASV3226	Unclassified_Dehalococcoidia_1_ASV3226	Absence	Presence
337	Unclassified_GIF3_2_ASV3584	Unclassified_GIF3_2_ASV3584	Absence	Presence
338	Unclassified_C0119_1_ASV2961	Unclassified_C0119_1_ASV2961	Absence	Presence
339	Leptospira_ASV1242	Leptospira_ASV1242	Absence	Presence
340	Unclassified_Acidobacteriae_1_ASV2481	Unclassified_Acidobacteriae_1_ASV2481	Absence	Presence
341	Bryobacter_ASV381	Bryobacter_ASV381	Absence	Presence
342	Unclassified_Acidimicrobiia_1_ASV2479	Unclassified_Acidimicrobiia_1_ASV2479	Absence	Presence
343	Unclassified_Microtrichales_3_ASV3879	Unclassified_Microtrichales_3_ASV3879	Absence	Presence
344	Unclassified_Microtrichales_4_ASV3880	Unclassified_Microtrichales_4_ASV3880	Absence	Presence
345	Unclassified_Microtrichaceae_1_ASV3874	Unclassified_Microtrichaceae_1_ASV3874	Absence	Presence
346	Unclassified_Actinomarinales_3_ASV2506	Unclassified_Actinomarinales_3_ASV2506	Absence	Presence
347	Unclassified_Actinomarinales_6_ASV2509	Unclassified_Actinomarinales_6_ASV2509	Absence	Presence
348	Unclassified_Actinomarinales_13_ASV2502	Unclassified_Actinomarinales_13_ASV2502	Absence	Presence
349	Unclassified_Actinomarinales_1_ASV2498	Unclassified_Actinomarinales_1_ASV2498	Absence	Presence
350	Unclassified_Nocardioidaceae_2_ASV3978	Unclassified_Nocardioidaceae_2_ASV3978	Absence	Presence
351	Aeromicrobium_ASV99	Aeromicrobium_ASV99	Absence	Presence
352	Nocardioides_ASV1497	Nocardioides_ASV1497	Absence	Presence
353	Aeromicrobium_ASV98	Aeromicrobium_ASV98	Absence	Presence
354	Nocardioides_ASV1500	Nocardioides_ASV1500	Absence	Presence
355	Nocardioides_ASV1501	Nocardioides_ASV1501	Absence	Presence
356	Streptomyces_ASV2258	Streptomyces_ASV2258	Absence	Presence
357	Unclassified_PeM15_1_ASV4083	Unclassified_PeM15_1_ASV4083	Absence	Presence
358	Unclassified_PeM15_2_ASV4085	Unclassified_PeM15_2_ASV4085	Absence	Presence
359	Unclassified_PeM15_5_ASV4088	Unclassified_PeM15_5_ASV4088	Absence	Presence
360	Unclassified_PeM15_10_ASV4084	Unclassified_PeM15_10_ASV4084	Absence	Presence
361	Unclassified_PeM15_8_ASV4091	Unclassified_PeM15_8_ASV4091	Absence	Presence
362	Unclassified_Actinobacteria_3_ASV2495	Unclassified_Actinobacteria_3_ASV2495	Absence	Presence
363	Unclassified_PeM15_4_ASV4087	Unclassified_PeM15_4_ASV4087	Absence	Presence
364	Unclassified_PeM15_7_ASV4090	Unclassified_PeM15_7_ASV4090	Absence	Presence
365	Unclassified_PeM15_3_ASV4086	Unclassified_PeM15_3_ASV4086	Absence	Presence
366	Unclassified_PeM15_9_ASV4092	Unclassified_PeM15_9_ASV4092	Absence	Presence
367	Unclassified_Actinobacteria_2_ASV2494	Unclassified_Actinobacteria_2_ASV2494	Absence	Presence
368	Unclassified_Actinobacteriota_1_ASV2496	Unclassified_Actinobacteriota_1_ASV2496	Absence	Presence
369	Unclassified_Pseudonocardiaceae_4_ASV4261	Unclassified_Pseudonocardiaceae_4_ASV4261	Absence	Presence
370	Saccharopolyspora_ASV1962	Saccharopolyspora_ASV1962	Absence	Presence
371	Unclassified_Pseudonocardiaceae_2_ASV4259	Unclassified_Pseudonocardiaceae_2_ASV4259	Absence	Presence
372	Unclassified_Pseudonocardiaceae_1_ASV4258	Unclassified_Pseudonocardiaceae_1_ASV4258	Absence	Presence
373	Saccharopolyspora_ASV1961	Saccharopolyspora_ASV1961	Absence	Presence
374	Saccharopolyspora_ASV1959	Saccharopolyspora_ASV1959	Absence	Presence
375	Saccharopolyspora_ASV1960	Saccharopolyspora_ASV1960	Absence	Presence
376	Saccharopolyspora_ASV1963	Saccharopolyspora_ASV1963	Absence	Presence
377	Amycolatopsis_ASV175	Amycolatopsis_ASV175	Absence	Presence
378	Rhodococcus_ASV1833	Rhodococcus_ASV1833	Absence	Presence
379	Rhodococcus_ASV1829	Rhodococcus_ASV1829	Absence	Presence
380	Rhodococcus_ASV1834	Rhodococcus_ASV1834	Absence	Presence
381	Rhodococcus_ASV1836	Rhodococcus_ASV1836	Absence	Presence
382	Dietzia_ASV842	Dietzia_ASV842	Absence	Presence
383	Gordonia_ASV1025	Gordonia_ASV1025	Absence	Presence
384	Corynebacterium_ASV657	Corynebacterium_ASV657	Absence	Presence
385	Corynebacterium_ASV646	Corynebacterium_ASV646	Absence	Presence
386	Corynebacterium_ASV660	Corynebacterium_ASV660	Absence	Presence
387	Corynebacterium_ASV658	Corynebacterium_ASV658	Absence	Presence
388	Corynebacterium_ASV665	Corynebacterium_ASV665	Absence	Presence
389	Corynebacterium_ASV671	Corynebacterium_ASV671	Absence	Presence
390	Corynebacterium_ASV650	Corynebacterium_ASV650	Absence	Presence
391	Corynebacterium_ASV651	Corynebacterium_ASV651	Absence	Presence
392	Corynebacterium_ASV656	Corynebacterium_ASV656	Absence	Presence
393	Corynebacterium_ASV654	Corynebacterium_ASV654	Absence	Presence
394	Corynebacterium_ASV675	Corynebacterium_ASV675	Absence	Presence
395	Corynebacterium_ASV678	Corynebacterium_ASV678	Absence	Presence
396	Corynebacterium_ASV648	Corynebacterium_ASV648	Absence	Presence
397	Lawsonella_ASV1194	Lawsonella_ASV1194	Absence	Presence
398	Rhodococcus_ASV1835	Rhodococcus_ASV1835	Absence	Presence
399	Mycobacterium_ASV1417	Mycobacterium_ASV1417	Absence	Presence
400	Mycobacterium_ASV1423	Mycobacterium_ASV1423	Absence	Presence
401	Mycobacterium_ASV1428	Mycobacterium_ASV1428	Absence	Presence
402	Mycobacterium_ASV1418	Mycobacterium_ASV1418	Absence	Presence
403	Mycobacterium_ASV1426	Mycobacterium_ASV1426	Absence	Presence
404	Mycobacterium_ASV1427	Mycobacterium_ASV1427	Absence	Presence
405	Blastococcus_ASV334	Blastococcus_ASV334	Absence	Presence
406	Geodermatophilus_ASV1010	Geodermatophilus_ASV1010	Absence	Presence
407	Geodermatophilus_ASV1011	Geodermatophilus_ASV1011	Absence	Presence
408	Actinoplanes_ASV88	Actinoplanes_ASV88	Absence	Presence
409	Unclassified_Micromonosporaceae_3_ASV3870	Unclassified_Micromonosporaceae_3_ASV3870	Absence	Presence
410	Unclassified_Micromonosporaceae_1_ASV3868	Unclassified_Micromonosporaceae_1_ASV3868	Absence	Presence
411	Unclassified_Micromonosporaceae_2_ASV3869	Unclassified_Micromonosporaceae_2_ASV3869	Absence	Presence
412	Acidothermus_ASV48	Acidothermus_ASV48	Absence	Presence
413	Leucobacter_ASV1247	Leucobacter_ASV1247	Absence	Presence
414	Aurantimicrobium_ASV234	Aurantimicrobium_ASV234	Absence	Presence
415	Candidatus_Limnoluna_ASV439	Candidatus_Limnoluna_ASV439	Absence	Presence
416	Unclassified_Microbacteriaceae_6_ASV3851	Unclassified_Microbacteriaceae_6_ASV3851	Absence	Presence
417	Candidatus_Limnoluna_ASV440	Candidatus_Limnoluna_ASV440	Absence	Presence
418	Unclassified_Cellulomonadaceae_1_ASV3005	Unclassified_Cellulomonadaceae_1_ASV3005	Absence	Presence
419	Unclassified_Microbacteriaceae_12_ASV3846	Unclassified_Microbacteriaceae_12_ASV3846	Absence	Presence
420	Unclassified_Micrococcales_3_ASV3863	Unclassified_Micrococcales_3_ASV3863	Absence	Presence
421	Flaviflexus_ASV931	Flaviflexus_ASV931	Absence	Presence
422	Unclassified_Micrococcales_5_ASV3865	Unclassified_Micrococcales_5_ASV3865	Absence	Presence
423	Terrabacter_ASV2331	Terrabacter_ASV2331	Absence	Presence
424	Unclassified_Dermabacteraceae_1_ASV3230	Unclassified_Dermabacteraceae_1_ASV3230	Absence	Presence
425	Brachybacterium_ASV350	Brachybacterium_ASV350	Absence	Presence
426	Bifidobacterium_ASV315	Bifidobacterium_ASV315	Absence	Presence
427	Bifidobacterium_ASV317	Bifidobacterium_ASV317	Absence	Presence
428	Rothia_ASV1921	Rothia_ASV1921	Absence	Presence
429	Arthrobacter_ASV219	Arthrobacter_ASV219	Absence	Presence
430	Micrococcus_ASV1395	Micrococcus_ASV1395	Absence	Presence
431	Arthrobacter_ASV220	Arthrobacter_ASV220	Absence	Presence
432	Unclassified_Micrococcaceae_4_ASV3858	Unclassified_Micrococcaceae_4_ASV3858	Absence	Presence
433	Brevibacterium_ASV359	Brevibacterium_ASV359	Absence	Presence
434	Brevibacterium_ASV357	Brevibacterium_ASV357	Absence	Presence
435	Brevibacterium_ASV360	Brevibacterium_ASV360	Absence	Presence
436	Saccharomonospora_ASV1958	Saccharomonospora_ASV1958	Absence	Presence
437	Actinomyces_ASV80	Actinomyces_ASV80	Absence	Presence
438	Actinomyces_ASV76	Actinomyces_ASV76	Absence	Presence
439	Actinomyces_ASV79	Actinomyces_ASV79	Absence	Presence
440	Actinomyces_ASV81	Actinomyces_ASV81	Absence	Presence
441	Unclassified_Euzebyaceae_1_ASV3373	Unclassified_Euzebyaceae_1_ASV3373	Absence	Presence
442	Unclassified_MB-A2-108_2_ASV3821	Unclassified_MB-A2-108_2_ASV3821	Absence	Presence
443	Unclassified_Eggerthellaceae_1_ASV3314	Unclassified_Eggerthellaceae_1_ASV3314	Absence	Presence
444	Unclassidied_67-14_4_ASV2414	Unclassidied_67-14_4_ASV2414	Absence	Presence
445	Unclassidied_67-14_5_ASV2415	Unclassidied_67-14_5_ASV2415	Absence	Presence
446	Unclassidied_67-14_1_ASV2411	Unclassidied_67-14_1_ASV2411	Absence	Presence
447	Unclassified_Solirubrobacterales_1_ASV4741	Unclassified_Solirubrobacterales_1_ASV4741	Absence	Presence
448	Solirubrobacter_ASV2106	Solirubrobacter_ASV2106	Absence	Presence
449	Conexibacter_ASV644	Conexibacter_ASV644	Absence	Presence
450	Rubrobacter_ASV1946	Rubrobacter_ASV1946	Absence	Presence
451	Rubrobacter_ASV1945	Rubrobacter_ASV1945	Absence	Presence
452	Rubrobacter_ASV1949	Rubrobacter_ASV1949	Absence	Presence
453	Unclassified_BD2-11_terrestrial_group_26_ASV2857	Unclassified_BD2-11_terrestrial_group_26_ASV2857	Absence	Presence
454	Unclassified_BD2-11_terrestrial_group_25_ASV2856	Unclassified_BD2-11_terrestrial_group_25_ASV2856	Absence	Presence
455	Unclassified_PAUC43f_marine_benthic_group_3_ASV4064	Unclassified_PAUC43f_marine_benthic_group_3_ASV4064	Absence	Presence
456	Unclassified_Rokubacteriales_ASV1892	Unclassified_Rokubacteriales_ASV1892	Absence	Presence
457	Unclassified_Gemmatimonadaceae_8_ASV3580	Unclassified_Gemmatimonadaceae_8_ASV3580	Absence	Presence
458	Unclassified_Gemmatimonadaceae_5_ASV3577	Unclassified_Gemmatimonadaceae_5_ASV3577	Absence	Presence
459	Gemmatimonas_ASV1006	Gemmatimonas_ASV1006	Absence	Presence
460	Gemmatimonas_ASV1004	Gemmatimonas_ASV1004	Absence	Presence
461	Gemmatimonas_ASV1005	Gemmatimonas_ASV1005	Absence	Presence
462	Unclassified_Gemmatimonadaceae_10_ASV3572	Unclassified_Gemmatimonadaceae_10_ASV3572	Absence	Presence
463	Unclassified_Gemmatimonadaceae_7_ASV3579	Unclassified_Gemmatimonadaceae_7_ASV3579	Absence	Presence
464	Unclassified_Latescibacterota_6_ASV3741	Unclassified_Latescibacterota_6_ASV3741	Absence	Presence
465	Calorithrix_ASV396	Calorithrix_ASV396	Absence	Presence
466	Caldithrix_ASV389	Caldithrix_ASV389	Absence	Presence
467	Caldithrix_ASV393	Caldithrix_ASV393	Absence	Presence
468	Caldithrix_ASV390	Caldithrix_ASV390	Absence	Presence
469	Unclassified_Calditrichaceae_3_ASV2971	Unclassified_Calditrichaceae_3_ASV2971	Absence	Presence
470	Desulfatiglans_ASV758	Desulfatiglans_ASV758	Absence	Presence
471	Unclassified_Desulfobacterota_6_ASV3246	Unclassified_Desulfobacterota_6_ASV3246	Absence	Presence
472	Unclassified_Rs-K70_termite_group_2_ASV1925	Unclassified_Rs-K70_termite_group_2_ASV1925	Absence	Presence
473	Unclassified_Desulfocapsaceae_1_ASV3250	Unclassified_Desulfocapsaceae_1_ASV3250	Absence	Presence
474	Desulfopila_ASV792	Desulfopila_ASV792	Absence	Presence
475	Unclassified_Desulfocapsaceae_4_ASV3253	Unclassified_Desulfocapsaceae_4_ASV3253	Absence	Presence
476	Desulfatiglans_ASV750	Desulfatiglans_ASV750	Absence	Presence
477	Desulfatiglans_ASV746	Desulfatiglans_ASV746	Absence	Presence
478	Desulfatiglans_ASV752	Desulfatiglans_ASV752	Absence	Presence
479	Desulfatiglans_ASV759	Desulfatiglans_ASV759	Absence	Presence
480	Desulfatiglans_ASV739	Desulfatiglans_ASV739	Absence	Presence
481	Desulfatiglans_ASV744	Desulfatiglans_ASV744	Absence	Presence
482	Desulfatiglans_ASV747	Desulfatiglans_ASV747	Absence	Presence
483	Desulfatiglans_ASV754	Desulfatiglans_ASV754	Absence	Presence
484	P3OB-42_ASV1569	P3OB-42_ASV1569	Absence	Presence
485	P3OB-42_ASV1566	P3OB-42_ASV1566	Absence	Presence
486	P3OB-42_ASV1573	P3OB-42_ASV1573	Absence	Presence
487	Unclassified_Desulfobacterota_4_ASV3244	Unclassified_Desulfobacterota_4_ASV3244	Absence	Presence
488	Unclassified_Desulfobacterota_9_ASV3249	Unclassified_Desulfobacterota_9_ASV3249	Absence	Presence
489	Unclassified_Myxococcales_2_ASV3917	Unclassified_Myxococcales_2_ASV3917	Absence	Presence
490	Unclassified_Myxococcaceae_4_ASV3915	Unclassified_Myxococcaceae_4_ASV3915	Absence	Presence
491	Unclassified_Myxococcaceae_2_ASV3913	Unclassified_Myxococcaceae_2_ASV3913	Absence	Presence
492	Unclassified_Myxococcaceae_1_ASV3912	Unclassified_Myxococcaceae_1_ASV3912	Absence	Presence
493	Unclassified_Sandaracinaceae_7_ASV4523	Unclassified_Sandaracinaceae_7_ASV4523	Absence	Presence
494	Unclassified_Sandaracinaceae_3_ASV4519	Unclassified_Sandaracinaceae_3_ASV4519	Absence	Presence
495	Unclassified_Sandaracinaceae_9_ASV4525	Unclassified_Sandaracinaceae_9_ASV4525	Absence	Presence
496	Unclassified_Sandaracinaceae_14_ASV4517	Unclassified_Sandaracinaceae_14_ASV4517	Absence	Presence
497	Unclassified_Sandaracinaceae_10_ASV4513	Unclassified_Sandaracinaceae_10_ASV4513	Absence	Presence
498	Sandaracinus_ASV2033	Sandaracinus_ASV2033	Absence	Presence
499	Unclassified_Sandaracinaceae_5_ASV4521	Unclassified_Sandaracinaceae_5_ASV4521	Absence	Presence
500	Unclassified_Sandaracinaceae_4_ASV4520	Unclassified_Sandaracinaceae_4_ASV4520	Absence	Presence
501	Unclassified_NB1-j_19_ASV3933	Unclassified_NB1-j_19_ASV3933	Absence	Presence
502	Unclassified_NB1-j_13_ASV3927	Unclassified_NB1-j_13_ASV3927	Absence	Presence
503	Unclassified_NB1-j_4_ASV3939	Unclassified_NB1-j_4_ASV3939	Absence	Presence
504	Unclassified_Polyangiaceae_2_ASV4229	Unclassified_Polyangiaceae_2_ASV4229	Absence	Presence
505	Unclassified_mle1-27_1_ASV3885	Unclassified_mle1-27_1_ASV3885	Absence	Presence
506	Reyranella_ASV1814	Reyranella_ASV1814	Absence	Presence
507	Reyranella_ASV1813	Reyranella_ASV1813	Absence	Presence
508	SWB02_ASV2310	SWB02_ASV2310	Absence	Presence
509	Unclassified_Hyphomonadaceae_1_ASV3627	Unclassified_Hyphomonadaceae_1_ASV3627	Absence	Presence
510	Unclassified_Hyphomonadaceae_9_ASV3637	Unclassified_Hyphomonadaceae_9_ASV3637	Absence	Presence
511	Unclassified_Hyphomonadaceae_5_ASV3633	Unclassified_Hyphomonadaceae_5_ASV3633	Absence	Presence
512	Unclassified_Hyphomonadaceae_10_ASV3628	Unclassified_Hyphomonadaceae_10_ASV3628	Absence	Presence
513	Unclassified_Parvularculaceae_1_ASV4043	Unclassified_Parvularculaceae_1_ASV4043	Absence	Presence
514	Amphiplicatus_ASV173	Amphiplicatus_ASV173	Absence	Presence
515	Wolbachia_ASV5103	Wolbachia_ASV5103	Absence	Presence
516	Unclassified_Defluviicoccales_4_ASV3223	Unclassified_Defluviicoccales_4_ASV3223	Absence	Presence
517	Unclassified_EF100-94H03_ASV856	Unclassified_EF100-94H03_ASV856	Absence	Presence
518	Unclassified_Alphaproteobacteria_4_ASV2572	Unclassified_Alphaproteobacteria_4_ASV2572	Absence	Presence
519	Unclassified_Alphaproteobacteria_21_ASV2554	Unclassified_Alphaproteobacteria_21_ASV2554	Absence	Presence
520	Unclassified_Alphaproteobacteria_15_ASV2547	Unclassified_Alphaproteobacteria_15_ASV2547	Absence	Presence
521	Unclassified_Rhodobacteraceae_102_ASV4349	Unclassified_Rhodobacteraceae_102_ASV4349	Absence	Presence
522	Unclassified_Rhodobacteraceae_72_ASV4417	Unclassified_Rhodobacteraceae_72_ASV4417	Absence	Presence
523	Unclassified_Rhodobacteraceae_62_ASV4406	Unclassified_Rhodobacteraceae_62_ASV4406	Absence	Presence
524	Rubribacterium_ASV1937	Rubribacterium_ASV1937	Absence	Presence
525	Rubribacterium_ASV1939	Rubribacterium_ASV1939	Absence	Presence
526	Unclassified_Geminicoccaceae_4_ASV3552	Unclassified_Geminicoccaceae_4_ASV3552	Absence	Presence
527	Unclassified_Magnetospiraceae_1_ASV3789	Unclassified_Magnetospiraceae_1_ASV3789	Absence	Presence
528	Unclassified_Rhizobiaceae_11_ASV4295	Unclassified_Rhizobiaceae_11_ASV4295	Absence	Presence
529	Bartonella_ASV277	Bartonella_ASV277	Absence	Presence
530	Unclassified_Hyphomonadaceae_4_ASV3632	Unclassified_Hyphomonadaceae_4_ASV3632	Absence	Presence
531	Unclassified_Rhizobiaceae_20_ASV4305	Unclassified_Rhizobiaceae_20_ASV4305	Absence	Presence
532	Unclassified_Rhizobiaceae_13_ASV4297	Unclassified_Rhizobiaceae_13_ASV4297	Absence	Presence
533	Allorhizobium-Neorhizobium-Pararhizobium-Rhizobium_ASV141	Allorhizobium-Neorhizobium-Pararhizobium-Rhizobium_ASV141	Absence	Presence
534	Bartonella_ASV282	Bartonella_ASV282	Absence	Presence
535	Bartonella_ASV280	Bartonella_ASV280	Absence	Presence
536	Unclassified_Rhizobiaceae_21_ASV4306	Unclassified_Rhizobiaceae_21_ASV4306	Absence	Presence
537	Unclassified_Rhodobacteraceae_4_ASV4381	Unclassified_Rhodobacteraceae_4_ASV4381	Absence	Presence
538	Methyloceanibacter_ASV1376	Methyloceanibacter_ASV1376	Absence	Presence
539	Phenylobacterium_ASV1654	Phenylobacterium_ASV1654	Absence	Presence
540	Unclassified_Caulobacteraceae_1_ASV2997	Unclassified_Caulobacteraceae_1_ASV2997	Absence	Presence
541	Brevundimonas_ASV371	Brevundimonas_ASV371	Absence	Presence
542	Brevundimonas_ASV369	Brevundimonas_ASV369	Absence	Presence
543	Phenylobacterium_ASV1652	Phenylobacterium_ASV1652	Absence	Presence
544	Unclassified_Caulobacteraceae_2_ASV2998	Unclassified_Caulobacteraceae_2_ASV2998	Absence	Presence
545	Salinarimonas_ASV1967	Salinarimonas_ASV1967	Absence	Presence
546	Unclassified_Beijerinckiaceae_9_ASV2902	Unclassified_Beijerinckiaceae_9_ASV2902	Absence	Presence
547	Unclassified_Beijerinckiaceae_23_ASV2892	Unclassified_Beijerinckiaceae_23_ASV2892	Absence	Presence
548	Unclassified_Beijerinckiaceae_20_ASV2889	Unclassified_Beijerinckiaceae_20_ASV2889	Absence	Presence
549	Phreatobacter_ASV1672	Phreatobacter_ASV1672	Absence	Presence
550	Rhodopseudomonas_ASV1866	Rhodopseudomonas_ASV1866	Absence	Presence
551	Unclassified_Xanthobacteraceae_4_ASV4956	Unclassified_Xanthobacteraceae_4_ASV4956	Absence	Presence
552	Unclassified_Xanthobacteraceae_9_ASV4961	Unclassified_Xanthobacteraceae_9_ASV4961	Absence	Presence
553	Unclassified_Xanthobacteraceae_8_ASV4960	Unclassified_Xanthobacteraceae_8_ASV4960	Absence	Presence
554	Rhodomicrobium_ASV1843	Rhodomicrobium_ASV1843	Absence	Presence
555	Devosia_ASV829	Devosia_ASV829	Absence	Presence
556	Hyphomicrobium_ASV1118	Hyphomicrobium_ASV1118	Absence	Presence
557	alphaI_cluster_ASV161	alphaI_cluster_ASV161	Absence	Presence
558	alphaI_cluster_ASV163	alphaI_cluster_ASV163	Absence	Presence
559	Unclassified_Rhodobacteraceae_24_ASV4364	Unclassified_Rhodobacteraceae_24_ASV4364	Absence	Presence
560	Hyphomicrobium_ASV1110	Hyphomicrobium_ASV1110	Absence	Presence
561	Paracoccus_ASV1599	Paracoccus_ASV1599	Absence	Presence
562	Unclassified_Rhodobacteraceae_20_ASV4360	Unclassified_Rhodobacteraceae_20_ASV4360	Absence	Presence
563	Unclassified_Rhodobacteraceae_86_ASV4432	Unclassified_Rhodobacteraceae_86_ASV4432	Absence	Presence
564	Roseovarius_ASV1920	Roseovarius_ASV1920	Absence	Presence
565	Unclassified_Rhodobacteraceae_81_ASV4427	Unclassified_Rhodobacteraceae_81_ASV4427	Absence	Presence
566	Unclassified_Rhodobacteraceae_45_ASV4387	Unclassified_Rhodobacteraceae_45_ASV4387	Absence	Presence
567	Roseovarius_ASV1917	Roseovarius_ASV1917	Absence	Presence
568	Unclassified_Rhodobacteraceae_38_ASV4379	Unclassified_Rhodobacteraceae_38_ASV4379	Absence	Presence
569	Unclassified_Rhodobacteraceae_73_ASV4418	Unclassified_Rhodobacteraceae_73_ASV4418	Absence	Presence
570	Unclassified_Rhodobacteraceae_79_ASV4424	Unclassified_Rhodobacteraceae_79_ASV4424	Absence	Presence
571	Rubellimicrobium_ASV1931	Rubellimicrobium_ASV1931	Absence	Presence
572	Rubellimicrobium_ASV1927	Rubellimicrobium_ASV1927	Absence	Presence
573	Unclassified_Rhodobacteraceae_55_ASV4398	Unclassified_Rhodobacteraceae_55_ASV4398	Absence	Presence
574	Unclassified_Rhodobacteraceae_30_ASV4371	Unclassified_Rhodobacteraceae_30_ASV4371	Absence	Presence
575	Unclassified_Rhodobacteraceae_87_ASV4433	Unclassified_Rhodobacteraceae_87_ASV4433	Absence	Presence
576	Unclassified_Rhodobacteraceae_11_ASV4350	Unclassified_Rhodobacteraceae_11_ASV4350	Absence	Presence
577	Unclassified_Rhodobacteraceae_43_ASV4385	Unclassified_Rhodobacteraceae_43_ASV4385	Absence	Presence
578	Unclassified_Rhodobacteraceae_59_ASV4402	Unclassified_Rhodobacteraceae_59_ASV4402	Absence	Presence
579	Unclassified_Rhodobacteraceae_50_ASV4393	Unclassified_Rhodobacteraceae_50_ASV4393	Absence	Presence
580	Unclassified_Rhodobacteraceae_74_ASV4419	Unclassified_Rhodobacteraceae_74_ASV4419	Absence	Presence
581	Unclassified_Rhodobacteraceae_34_ASV4375	Unclassified_Rhodobacteraceae_34_ASV4375	Absence	Presence
582	Unclassified_Rhodobacteraceae_28_ASV4368	Unclassified_Rhodobacteraceae_28_ASV4368	Absence	Presence
583	Unclassified_Rhodobacteraceae_48_ASV4390	Unclassified_Rhodobacteraceae_48_ASV4390	Absence	Presence
584	Unclassified_Rhodobacteraceae_22_ASV4362	Unclassified_Rhodobacteraceae_22_ASV4362	Absence	Presence
585	Unclassified_Rhodobacteraceae_67_ASV4411	Unclassified_Rhodobacteraceae_67_ASV4411	Absence	Presence
586	Unclassified_Rhodobacteraceae_12_ASV4351	Unclassified_Rhodobacteraceae_12_ASV4351	Absence	Presence
587	Unclassified_Rhizobiaceae_7_ASV4319	Unclassified_Rhizobiaceae_7_ASV4319	Absence	Presence
588	Dichotomicrobium_ASV839	Dichotomicrobium_ASV839	Absence	Presence
589	Unclassified_Rhodobacteraceae_54_ASV4397	Unclassified_Rhodobacteraceae_54_ASV4397	Absence	Presence
590	Unclassified_Rhodospirillaceae_2_ASV4454	Unclassified_Rhodospirillaceae_2_ASV4454	Absence	Presence
591	Unclassified_Alphaproteobacteria_27_ASV2560	Unclassified_Alphaproteobacteria_27_ASV2560	Absence	Presence
592	Unclassified_Alphaproteobacteria_7_ASV2575	Unclassified_Alphaproteobacteria_7_ASV2575	Absence	Presence
593	Unclassified_Thalassobaculales_1_ASV4849	Unclassified_Thalassobaculales_1_ASV4849	Absence	Presence
594	Dongia_ASV849	Dongia_ASV849	Absence	Presence
595	Roseomonas_ASV1914	Roseomonas_ASV1914	Absence	Presence
596	Roseomonas_ASV1913	Roseomonas_ASV1913	Absence	Presence
597	Unclassified_Acetobacteraceae_4_ASV2469	Unclassified_Acetobacteraceae_4_ASV2469	Absence	Presence
598	Commensalibacter_ASV639	Commensalibacter_ASV639	Absence	Presence
599	Endobacter_ASV862	Endobacter_ASV862	Absence	Presence
600	Unclassified_Acetobacteraceae_8_ASV2473	Unclassified_Acetobacteraceae_8_ASV2473	Absence	Presence
601	Rhodovastum_ASV1869	Rhodovastum_ASV1869	Absence	Presence
602	Roseomonas_ASV1909	Roseomonas_ASV1909	Absence	Presence
603	Unclassified_Acetobacteraceae_7_ASV2472	Unclassified_Acetobacteraceae_7_ASV2472	Absence	Presence
604	Skermanella_ASV2091	Skermanella_ASV2091	Absence	Presence
605	Skermanella_ASV2090	Skermanella_ASV2090	Absence	Presence
606	Unclassified_Azospirillales_1_ASV2665	Unclassified_Azospirillales_1_ASV2665	Absence	Presence
607	Unclassified_Azospirillaceae_3_ASV2663	Unclassified_Azospirillaceae_3_ASV2663	Absence	Presence
608	Defluviicoccus_ASV723	Defluviicoccus_ASV723	Absence	Presence
609	Defluviicoccus_ASV718	Defluviicoccus_ASV718	Absence	Presence
610	Defluviicoccus_ASV725	Defluviicoccus_ASV725	Absence	Presence
611	Defluviicoccus_ASV722	Defluviicoccus_ASV722	Absence	Presence
612	Defluviicoccus_ASV724	Defluviicoccus_ASV724	Absence	Presence
613	Unclassified_Azospirillales_2_ASV2666	Unclassified_Azospirillales_2_ASV2666	Absence	Presence
614	Unclassified_Alphaproteobacteria_34_ASV2568	Unclassified_Alphaproteobacteria_34_ASV2568	Absence	Presence
615	Defluviicoccus_ASV719	Defluviicoccus_ASV719	Absence	Presence
616	Pelagibius_ASV1616	Pelagibius_ASV1616	Absence	Presence
617	Pelagibius_ASV1617	Pelagibius_ASV1617	Absence	Presence
618	Unclassified_Cardiobacteriaceae_1_ASV2994	Unclassified_Cardiobacteriaceae_1_ASV2994	Absence	Presence
619	Unclassified_Carnobacteriaceae_2_ASV2996	Unclassified_Carnobacteriaceae_2_ASV2996	Absence	Presence
620	Unclassified_Sphingomonadaceae_4_ASV4755	Unclassified_Sphingomonadaceae_4_ASV4755	Absence	Presence
621	Unclassified_Magnetospirillaceae_1_ASV3791	Unclassified_Magnetospirillaceae_1_ASV3791	Absence	Presence
622	Sphingomonas_ASV2129	Sphingomonas_ASV2129	Absence	Presence
623	Sphingomonas_ASV2126	Sphingomonas_ASV2126	Absence	Presence
624	Sphingomonas_ASV2122	Sphingomonas_ASV2122	Absence	Presence
625	Sphingomonas_ASV2121	Sphingomonas_ASV2121	Absence	Presence
626	Sphingomonas_ASV2132	Sphingomonas_ASV2132	Absence	Presence
627	Unclassified_Sphingomonadaceae_8_ASV4759	Unclassified_Sphingomonadaceae_8_ASV4759	Absence	Presence
628	Sandaracinobacter_ASV2030	Sandaracinobacter_ASV2030	Absence	Presence
629	Sphingoaurantiacus_ASV2112	Sphingoaurantiacus_ASV2112	Absence	Presence
630	Sphingopyxis_ASV2143	Sphingopyxis_ASV2143	Absence	Presence
631	Sphingopyxis_ASV2144	Sphingopyxis_ASV2144	Absence	Presence
632	Unclassified_Sphingomonadaceae_7_ASV4758	Unclassified_Sphingomonadaceae_7_ASV4758	Absence	Presence
633	Sphingopyxis_ASV2142	Sphingopyxis_ASV2142	Absence	Presence
634	Sphingobium_ASV2116	Sphingobium_ASV2116	Absence	Presence
635	Sphingobium_ASV2118	Sphingobium_ASV2118	Absence	Presence
636	Novosphingobium_ASV1516	Novosphingobium_ASV1516	Absence	Presence
637	Novosphingobium_ASV1509	Novosphingobium_ASV1509	Absence	Presence
638	Blastomonas_ASV336	Blastomonas_ASV336	Absence	Presence
639	Unclassified_Sphingomonadaceae_5_ASV4756	Unclassified_Sphingomonadaceae_5_ASV4756	Absence	Presence
640	Unclassified_Sphingomonadaceae_10_ASV4748	Unclassified_Sphingomonadaceae_10_ASV4748	Absence	Presence
641	Altererythrobacter_ASV167	Altererythrobacter_ASV167	Absence	Presence
642	Altererythrobacter_ASV166	Altererythrobacter_ASV166	Absence	Presence
643	Unclassified_SAR324_clade(Marine_group_B)_4_ASV4598	Unclassified_SAR324_clade(Marine_group_B)_4_ASV4598	Absence	Presence
644	P3OB-42_ASV1565	P3OB-42_ASV1565	Absence	Presence
645	Nannocystis_ASV1463	Nannocystis_ASV1463	Absence	Presence
646	SEEP-SRB1_ASV2067	SEEP-SRB1_ASV2067	Absence	Presence
647	Unclassified_Desulfobacterota_7_ASV3247	Unclassified_Desulfobacterota_7_ASV3247	Absence	Presence
648	Bdellovibrio_ASV301	Bdellovibrio_ASV301	Absence	Presence
649	Bdellovibrio_ASV303	Bdellovibrio_ASV303	Absence	Presence
650	Bdellovibrio_ASV308	Bdellovibrio_ASV308	Absence	Presence
651	Unclassified_SAR324_clade(Marine_group_B)_15_ASV4595	Unclassified_SAR324_clade(Marine_group_B)_15_ASV4595	Absence	Presence
652	Unclassified_Holosporaceae_1_ASV3614	Unclassified_Holosporaceae_1_ASV3614	Absence	Presence
653	Unclassified_Desulfobacterota_13_ASV3241	Unclassified_Desulfobacterota_13_ASV3241	Absence	Presence
654	Unclassified_Bradymonadaceae_7_ASV2936	Unclassified_Bradymonadaceae_7_ASV2936	Absence	Presence
655	Unclassified_Bradymonadaceae_16_ASV2927	Unclassified_Bradymonadaceae_16_ASV2927	Absence	Presence
656	Unclassified_Bradymonadaceae_15_ASV2926	Unclassified_Bradymonadaceae_15_ASV2926	Absence	Presence
657	Unclassified_Bradymonadales_2_ASV2947	Unclassified_Bradymonadales_2_ASV2947	Absence	Presence
658	Unclassified_Bradymonadales_5_ASV2950	Unclassified_Bradymonadales_5_ASV2950	Absence	Presence
659	Unclassified_Bradymonadales_14_ASV2945	Unclassified_Bradymonadales_14_ASV2945	Absence	Presence
660	Unclassified_Bradymonadales_11_ASV2942	Unclassified_Bradymonadales_11_ASV2942	Absence	Presence
661	Desulfovibrio_ASV808	Desulfovibrio_ASV808	Absence	Presence
662	Desulfovibrio_ASV810	Desulfovibrio_ASV810	Absence	Presence
663	Bilophila_ASV319	Bilophila_ASV319	Absence	Presence
664	Desulfovermiculus_ASV800	Desulfovermiculus_ASV800	Absence	Presence
665	Unclassified_Silvanigrellaceae_2_ASV4724	Unclassified_Silvanigrellaceae_2_ASV4724	Absence	Presence
666	Oligoflexus_ASV1547	Oligoflexus_ASV1547	Absence	Presence
667	Unclassified_Hydrogenedensaceae_2_ASV3618	Unclassified_Hydrogenedensaceae_2_ASV3618	Absence	Presence
668	Unclassified_Hydrogenedensaceae_3_ASV3619	Unclassified_Hydrogenedensaceae_3_ASV3619	Absence	Presence
669	Unclassified_Chthonomonadales_ASV557	Unclassified_Chthonomonadales_ASV557	Absence	Presence
670	Abditibacterium_ASV30	Abditibacterium_ASV30	Absence	Presence
671	Abditibacterium_ASV29	Abditibacterium_ASV29	Absence	Presence
672	Abditibacterium_ASV31	Abditibacterium_ASV31	Absence	Presence
673	Abditibacterium_ASV28	Abditibacterium_ASV28	Absence	Presence
674	Tumebacillus_ASV2389	Tumebacillus_ASV2389	Absence	Presence
675	Nevskia_ASV1473	Nevskia_ASV1473	Absence	Presence
676	Massilia_ASV1336	Massilia_ASV1336	Absence	Presence
677	Massilia_ASV1331	Massilia_ASV1331	Absence	Presence
678	Massilia_ASV1330	Massilia_ASV1330	Absence	Presence
679	Massilia_ASV1335	Massilia_ASV1335	Absence	Presence
680	Ellin6067_ASV860	Ellin6067_ASV860	Absence	Presence
681	Unclassified_MWH-UniP1_aquatic_group_2_ASV3911	Unclassified_MWH-UniP1_aquatic_group_2_ASV3911	Absence	Presence
682	Unclassified_Rhodocyclaceae_4_ASV4450	Unclassified_Rhodocyclaceae_4_ASV4450	Absence	Presence
683	Unclassified_Burkholderiaceae_2_ASV2956	Unclassified_Burkholderiaceae_2_ASV2956	Absence	Presence
684	Unclassified_Burkholderiaceae_1_ASV2955	Unclassified_Burkholderiaceae_1_ASV2955	Absence	Presence
685	Unclassified_Comamonadaceae_22_ASV3119	Unclassified_Comamonadaceae_22_ASV3119	Absence	Presence
686	Unclassified_Comamonadaceae_29_ASV3126	Unclassified_Comamonadaceae_29_ASV3126	Absence	Presence
687	Unclassified_Comamonadaceae_6_ASV3133	Unclassified_Comamonadaceae_6_ASV3133	Absence	Presence
688	Brachymonas_ASV352	Brachymonas_ASV352	Absence	Presence
689	Unclassified_Comamonadaceae_13_ASV3109	Unclassified_Comamonadaceae_13_ASV3109	Absence	Presence
690	Unclassified_Comamonadaceae_9_ASV3136	Unclassified_Comamonadaceae_9_ASV3136	Absence	Presence
691	Unclassified_Comamonadaceae_17_ASV3113	Unclassified_Comamonadaceae_17_ASV3113	Absence	Presence
692	Unclassified_Comamonadaceae_27_ASV3124	Unclassified_Comamonadaceae_27_ASV3124	Absence	Presence
693	Hydrogenophaga_ASV1099	Hydrogenophaga_ASV1099	Absence	Presence
694	Hydrogenophaga_ASV1098	Hydrogenophaga_ASV1098	Absence	Presence
695	Hydrogenophaga_ASV1097	Hydrogenophaga_ASV1097	Absence	Presence
696	Rhodoferax_ASV1840	Rhodoferax_ASV1840	Absence	Presence
697	Unclassified_Comamonadaceae_4_ASV3131	Unclassified_Comamonadaceae_4_ASV3131	Absence	Presence
698	Unclassified_Comamonadaceae_14_ASV3110	Unclassified_Comamonadaceae_14_ASV3110	Absence	Presence
699	Methylotenera_ASV1392	Methylotenera_ASV1392	Absence	Presence
700	Unclassified_Neisseriaceae_2_ASV3949	Unclassified_Neisseriaceae_2_ASV3949	Absence	Presence
701	Unclassified_Neisseriaceae_9_ASV3956	Unclassified_Neisseriaceae_9_ASV3956	Absence	Presence
702	Snodgrassella_ASV2103	Snodgrassella_ASV2103	Absence	Presence
703	Unclassified_Neisseriaceae_12_ASV3948	Unclassified_Neisseriaceae_12_ASV3948	Absence	Presence
704	Limnobacter_ASV1268	Limnobacter_ASV1268	Absence	Presence
705	Polynucleobacter_ASV1707	Polynucleobacter_ASV1707	Absence	Presence
706	Polynucleobacter_ASV1706	Polynucleobacter_ASV1706	Absence	Presence
707	Unclassified_Alcaligenaceae_4_ASV2539	Unclassified_Alcaligenaceae_4_ASV2539	Absence	Presence
708	Achromobacter_ASV41	Achromobacter_ASV41	Absence	Presence
709	Unclassified_Alcaligenaceae_1_ASV2536	Unclassified_Alcaligenaceae_1_ASV2536	Absence	Presence
710	GKS98_freshwater_group_ASV1020	GKS98_freshwater_group_ASV1020	Absence	Presence
711	GKS98_freshwater_group_ASV1019	GKS98_freshwater_group_ASV1019	Absence	Presence
712	Unclassified_TRA3-20_ASV2373	Unclassified_TRA3-20_ASV2373	Absence	Presence
713	966-1_ASV21	966-1_ASV21	Absence	Presence
714	Salinisphaera_ASV2016	Salinisphaera_ASV2016	Absence	Presence
715	Salinisphaera_ASV2022	Salinisphaera_ASV2022	Absence	Presence
716	Salinisphaera_ASV1995	Salinisphaera_ASV1995	Absence	Presence
717	Salinisphaera_ASV2001	Salinisphaera_ASV2001	Absence	Presence
718	Salinisphaera_ASV2012	Salinisphaera_ASV2012	Absence	Presence
719	Salinisphaera_ASV1989	Salinisphaera_ASV1989	Absence	Presence
720	Salinisphaera_ASV2002	Salinisphaera_ASV2002	Absence	Presence
721	Salinisphaera_ASV1987	Salinisphaera_ASV1987	Absence	Presence
722	Salinisphaera_ASV2024	Salinisphaera_ASV2024	Absence	Presence
723	Salinisphaera_ASV2018	Salinisphaera_ASV2018	Absence	Presence
724	Salinisphaera_ASV2010	Salinisphaera_ASV2010	Absence	Presence
725	Salinisphaera_ASV1994	Salinisphaera_ASV1994	Absence	Presence
726	Salinisphaera_ASV1992	Salinisphaera_ASV1992	Absence	Presence
727	Unclassified_Desulfosarcinaceae_3_ASV3271	Unclassified_Desulfosarcinaceae_3_ASV3271	Absence	Presence
728	Desulfobacter_ASV770	Desulfobacter_ASV770	Absence	Presence
729	Unclassified_Desulfosarcinaceae_11_ASV3268	Unclassified_Desulfosarcinaceae_11_ASV3268	Absence	Presence
730	Unclassified_Desulfosarcinaceae_12_ASV3269	Unclassified_Desulfosarcinaceae_12_ASV3269	Absence	Presence
731	Unclassified_Desulfovibrionaceae_3_ASV3284	Unclassified_Desulfovibrionaceae_3_ASV3284	Absence	Presence
732	Unclassified_Desulfobacterales_4_ASV3236	Unclassified_Desulfobacterales_4_ASV3236	Absence	Presence
733	Unclassified_Desulfobacterales_1_ASV3233	Unclassified_Desulfobacterales_1_ASV3233	Absence	Presence
734	Unclassified_Desulfovibrionaceae_6_ASV3287	Unclassified_Desulfovibrionaceae_6_ASV3287	Absence	Presence
735	Sva0081_sediment_group_ASV2296	Sva0081_sediment_group_ASV2296	Absence	Presence
736	Unclassified_Desulfovibrionaceae_13_ASV3282	Unclassified_Desulfovibrionaceae_13_ASV3282	Absence	Presence
737	Unclassified_Desulfococcaceae_2_ASV3258	Unclassified_Desulfococcaceae_2_ASV3258	Absence	Presence
738	Incertae_Sedis_ASV1127	Incertae_Sedis_ASV1127	Absence	Presence
739	Chujaibacter_ASV558	Chujaibacter_ASV558	Absence	Presence
740	Unclassified_Xanthomonadaceae_5_ASV4966	Unclassified_Xanthomonadaceae_5_ASV4966	Absence	Presence
741	Lysobacter_ASV1297	Lysobacter_ASV1297	Absence	Presence
742	Stenotrophomonas_ASV2231	Stenotrophomonas_ASV2231	Absence	Presence
743	Stenotrophomonas_ASV2227	Stenotrophomonas_ASV2227	Absence	Presence
744	Xanthomonas_ASV5108	Xanthomonas_ASV5108	Absence	Presence
745	Pseudoxanthomonas_ASV1781	Pseudoxanthomonas_ASV1781	Absence	Presence
746	Lysobacter_ASV1298	Lysobacter_ASV1298	Absence	Presence
747	Rhodanobacter_ASV1823	Rhodanobacter_ASV1823	Absence	Presence
748	Luteibacter_ASV1278	Luteibacter_ASV1278	Absence	Presence
749	Luteibacter_ASV1276	Luteibacter_ASV1276	Absence	Presence
750	Unclassified_Rhodanobacteraceae_3_ASV4342	Unclassified_Rhodanobacteraceae_3_ASV4342	Absence	Presence
751	Tahibacter_ASV2318	Tahibacter_ASV2318	Absence	Presence
752	Allochromatium_ASV136	Allochromatium_ASV136	Absence	Presence
753	Alcanivorax_ASV114	Alcanivorax_ASV114	Absence	Presence
754	Unclassified_Gammaproteobacteria_19_ASV3472	Unclassified_Gammaproteobacteria_19_ASV3472	Absence	Presence
755	Alcanivorax_ASV109	Alcanivorax_ASV109	Absence	Presence
756	Unclassified_Wohlfahrtiimonadaceae_2_ASV4948	Unclassified_Wohlfahrtiimonadaceae_2_ASV4948	Absence	Presence
757	Unclassified_Gammaproteobacteria_44_ASV3500	Unclassified_Gammaproteobacteria_44_ASV3500	Absence	Presence
758	Unclassified_Gammaproteobacteria_1_ASV3462	Unclassified_Gammaproteobacteria_1_ASV3462	Absence	Presence
759	Methyloparacoccus_ASV1385	Methyloparacoccus_ASV1385	Absence	Presence
760	Unclassified_Gammaproteobacteria_57_ASV3514	Unclassified_Gammaproteobacteria_57_ASV3514	Absence	Presence
761	Unclassified_HOC36_3_ASV3612	Unclassified_HOC36_3_ASV3612	Absence	Presence
762	Unclassified_Nitrococcaceae_5_ASV3963	Unclassified_Nitrococcaceae_5_ASV3963	Absence	Presence
763	Candidatus_Thiosymbion_ASV479	Candidatus_Thiosymbion_ASV479	Absence	Presence
764	Unclassified_Gammaproteobacteria_59_ASV3516	Unclassified_Gammaproteobacteria_59_ASV3516	Absence	Presence
765	Unclassified_Chromatiaceae_10_ASV3053	Unclassified_Chromatiaceae_10_ASV3053	Absence	Presence
766	Unclassified_Arenicellaceae_4_ASV2656	Unclassified_Arenicellaceae_4_ASV2656	Absence	Presence
767	Halochromatium_ASV1058	Halochromatium_ASV1058	Absence	Presence
768	Thiohalocapsa_ASV2356	Thiohalocapsa_ASV2356	Absence	Presence
769	Coxiella_ASV683	Coxiella_ASV683	Absence	Presence
770	Coxiella_ASV679	Coxiella_ASV679	Absence	Presence
771	Woeseia_ASV5095	Woeseia_ASV5095	Absence	Presence
772	Unclassified_AT-s2-59_ASV233	Unclassified_AT-s2-59_ASV233	Absence	Presence
773	Marinobacterium_ASV1316	Marinobacterium_ASV1316	Absence	Presence
774	Nitrincola_ASV1477	Nitrincola_ASV1477	Absence	Presence
775	Nitrincola_ASV1476	Nitrincola_ASV1476	Absence	Presence
776	Pseudomonas_ASV1765	Pseudomonas_ASV1765	Absence	Presence
777	Marinobacter_ASV1310	Marinobacter_ASV1310	Absence	Presence
778	Marinobacter_ASV1307	Marinobacter_ASV1307	Absence	Presence
779	Marinobacter_ASV1308	Marinobacter_ASV1308	Absence	Presence
780	Marinobacter_ASV1311	Marinobacter_ASV1311	Absence	Presence
781	Unclassified_KI89A_clade_2_ASV3672	Unclassified_KI89A_clade_2_ASV3672	Absence	Presence
782	Pseudomonas_ASV1773	Pseudomonas_ASV1773	Absence	Presence
783	Pseudomonas_ASV1760	Pseudomonas_ASV1760	Absence	Presence
784	Pseudomonas_ASV1772	Pseudomonas_ASV1772	Absence	Presence
785	Pseudomonas_ASV1756	Pseudomonas_ASV1756	Absence	Presence
786	Pseudomonas_ASV1759	Pseudomonas_ASV1759	Absence	Presence
787	Pseudomonas_ASV1755	Pseudomonas_ASV1755	Absence	Presence
788	Pseudomonas_ASV1764	Pseudomonas_ASV1764	Absence	Presence
789	Unclassified_Pseudomonadaceae_1_ASV4249	Unclassified_Pseudomonadaceae_1_ASV4249	Absence	Presence
790	Unclassified_Alteromonadaceae_1_ASV2578	Unclassified_Alteromonadaceae_1_ASV2578	Absence	Presence
791	Unclassified_Steroidobacteraceae_2_ASV4800	Unclassified_Steroidobacteraceae_2_ASV4800	Absence	Presence
792	Unclassified_Gammaproteobacteria_31_ASV3486	Unclassified_Gammaproteobacteria_31_ASV3486	Absence	Presence
793	Unclassified_Steroidobacteraceae_1_ASV4799	Unclassified_Steroidobacteraceae_1_ASV4799	Absence	Presence
794	Unclassified_Spongiibacteraceae_3_ASV4783	Unclassified_Spongiibacteraceae_3_ASV4783	Absence	Presence
795	Snodgrassella_ASV2105	Snodgrassella_ASV2105	Absence	Presence
796	Acinetobacter_ASV50	Acinetobacter_ASV50	Absence	Presence
797	Gilliamella_ASV1016	Gilliamella_ASV1016	Absence	Presence
798	Phocoenobacter_ASV1656	Phocoenobacter_ASV1656	Absence	Presence
799	Haemophilus_ASV1041	Haemophilus_ASV1041	Absence	Presence
800	Haemophilus_ASV1042	Haemophilus_ASV1042	Absence	Presence
801	Unclassified_Pasteurellaceae_5_ASV4050	Unclassified_Pasteurellaceae_5_ASV4050	Absence	Presence
802	Unclassified_Pasteurellaceae_11_ASV4046	Unclassified_Pasteurellaceae_11_ASV4046	Absence	Presence
803	Mannheimia_ASV1301	Mannheimia_ASV1301	Absence	Presence
804	Rodentibacter_ASV1891	Rodentibacter_ASV1891	Absence	Presence
805	Proteus_ASV1732	Proteus_ASV1732	Absence	Presence
806	Xenorhabdus_ASV5112	Xenorhabdus_ASV5112	Absence	Presence
807	Arsenophonus_ASV217	Arsenophonus_ASV217	Absence	Presence
808	Aliidiomarina_ASV126	Aliidiomarina_ASV126	Absence	Presence
809	Idiomarina_ASV1123	Idiomarina_ASV1123	Absence	Presence
810	Photobacterium_ASV1668	Photobacterium_ASV1668	Absence	Presence
811	Oceanimonas_ASV1529	Oceanimonas_ASV1529	Absence	Presence
812	Vibrio_ASV5062	Vibrio_ASV5062	Absence	Presence
813	Vibrio_ASV5058	Vibrio_ASV5058	Absence	Presence
814	Vibrio_ASV5060	Vibrio_ASV5060	Absence	Presence
815	Vibrio_ASV5053	Vibrio_ASV5053	Absence	Presence
816	Vibrio_ASV5055	Vibrio_ASV5055	Absence	Presence
817	Serratia_ASV2073	Serratia_ASV2073	Absence	Presence
818	Serratia_ASV2076	Serratia_ASV2076	Absence	Presence
819	Serratia_ASV2074	Serratia_ASV2074	Absence	Presence
820	Escherichia-Shigella_ASV906	Escherichia-Shigella_ASV906	Absence	Presence
821	Escherichia-Shigella_ASV901	Escherichia-Shigella_ASV901	Absence	Presence
822	Escherichia-Shigella_ASV903	Escherichia-Shigella_ASV903	Absence	Presence
823	Escherichia-Shigella_ASV895	Escherichia-Shigella_ASV895	Absence	Presence
824	Unclassified_Enterobacterales_2_ASV3321	Unclassified_Enterobacterales_2_ASV3321	Absence	Presence
825	Unclassified_Enterobacteriaceae_1_ASV3326	Unclassified_Enterobacteriaceae_1_ASV3326	Absence	Presence
826	Unclassified_Enterobacteriaceae_18_ASV3335	Unclassified_Enterobacteriaceae_18_ASV3335	Absence	Presence
827	Enterobacter_ASV864	Enterobacter_ASV864	Absence	Presence
828	Unclassified_Enterobacteriaceae_7_ASV3344	Unclassified_Enterobacteriaceae_7_ASV3344	Absence	Presence
829	Ketobacter_ASV1137	Ketobacter_ASV1137	Absence	Presence
830	9M32_ASV25	9M32_ASV25	Absence	Presence
831	Moraxella_ASV1410	Moraxella_ASV1410	Absence	Presence
832	Psychrobacter_ASV1786	Psychrobacter_ASV1786	Absence	Presence
833	Psychrobacter_ASV1785	Psychrobacter_ASV1785	Absence	Presence
834	Alkanindiges_ASV135	Alkanindiges_ASV135	Absence	Presence
835	Acinetobacter_ASV57	Acinetobacter_ASV57	Absence	Presence
836	Acinetobacter_ASV60	Acinetobacter_ASV60	Absence	Presence
837	Acinetobacter_ASV63	Acinetobacter_ASV63	Absence	Presence
838	Unclassified_Moraxellaceae_2_ASV3901	Unclassified_Moraxellaceae_2_ASV3901	Absence	Presence
839	[Agitococcus]_lubricus_group_ASV1	[Agitococcus]_lubricus_group_ASV1	Absence	Presence
840	OM60(NOR5)_clade_ASV1548	OM60(NOR5)_clade_ASV1548	Absence	Presence
841	Unclassified_Alteromonadaceae_2_ASV2579	Unclassified_Alteromonadaceae_2_ASV2579	Absence	Presence
842	Alishewanella_ASV128	Alishewanella_ASV128	Absence	Presence
843	Pseudohongiella_ASV1749	Pseudohongiella_ASV1749	Absence	Presence
844	Pseudohongiella_ASV1748	Pseudohongiella_ASV1748	Absence	Presence
845	Unclassified_OM182_clade_2_ASV3999	Unclassified_OM182_clade_2_ASV3999	Absence	Presence
846	Halomonas_ASV1065	Halomonas_ASV1065	Absence	Presence
847	Halomonas_ASV1076	Halomonas_ASV1076	Absence	Presence
848	Halomonas_ASV1072	Halomonas_ASV1072	Absence	Presence
849	Halomonas_ASV1067	Halomonas_ASV1067	Absence	Presence
850	Halomonas_ASV1077	Halomonas_ASV1077	Absence	Presence
851	Unclassified_Halomonadaceae_5_ASV3609	Unclassified_Halomonadaceae_5_ASV3609	Absence	Presence
852	Halomonas_ASV1071	Halomonas_ASV1071	Absence	Presence
853	Chromohalobacter_ASV545	Chromohalobacter_ASV545	Absence	Presence
854	Marinospirillum_ASV1327	Marinospirillum_ASV1327	Absence	Presence
855	Marinospirillum_ASV1328	Marinospirillum_ASV1328	Absence	Presence
856	Alcanivorax_ASV117	Alcanivorax_ASV117	Absence	Presence
857	Unclassified_Dadabacteriales_2_ASV3219	Unclassified_Dadabacteriales_2_ASV3219	Absence	Presence
858	Unclassified_Gammaproteobacteria_4_ASV3495	Unclassified_Gammaproteobacteria_4_ASV3495	Absence	Presence
859	Unclassified_Gammaproteobacteria_20_ASV3474	Unclassified_Gammaproteobacteria_20_ASV3474	Absence	Presence
860	Unclassified_Gammaproteobacteria_5_ASV3506	Unclassified_Gammaproteobacteria_5_ASV3506	Absence	Presence
861	Unclassified_Ga0077536_ASV981	Unclassified_Ga0077536_ASV981	Absence	Presence
862	Unclassified_Nitrosococcaceae_2_ASV3966	Unclassified_Nitrosococcaceae_2_ASV3966	Absence	Presence
863	Unclassified_CCM19a_ASV499	Unclassified_CCM19a_ASV499	Absence	Presence
864	Halofilum_ASV1063	Halofilum_ASV1063	Absence	Presence
865	Unclassified_Gammaproteobacteria_64_ASV3522	Unclassified_Gammaproteobacteria_64_ASV3522	Absence	Presence
866	Unclassified_Gammaproteobacteria_69_ASV3527	Unclassified_Gammaproteobacteria_69_ASV3527	Absence	Presence
867	Unclassified_Gammaproteobacteria_65_ASV3523	Unclassified_Gammaproteobacteria_65_ASV3523	Absence	Presence
868	Wenzhouxiangella_ASV5089	Wenzhouxiangella_ASV5089	Absence	Presence
869	Wenzhouxiangella_ASV5090	Wenzhouxiangella_ASV5090	Absence	Presence
870	Unclassified_Woeseiaceae_3_ASV4945	Unclassified_Woeseiaceae_3_ASV4945	Absence	Presence
871	Unclassified_Nitrococcaceae_1_ASV3959	Unclassified_Nitrococcaceae_1_ASV3959	Absence	Presence
872	Unclassified_Nitrococcaceae_4_ASV3962	Unclassified_Nitrococcaceae_4_ASV3962	Absence	Presence
873	Unclassified_Nitrococcaceae_3_ASV3961	Unclassified_Nitrococcaceae_3_ASV3961	Absence	Presence
874	Methylophaga_ASV1390	Methylophaga_ASV1390	Absence	Presence
875	Candidatus_Thiobios_ASV475	Candidatus_Thiobios_ASV475	Absence	Presence
876	Unclassified_Diplorickettsiaceae_3_ASV3306	Unclassified_Diplorickettsiaceae_3_ASV3306	Absence	Presence
877	Pseudohongiella_ASV1750	Pseudohongiella_ASV1750	Absence	Presence
878	Aquicella_ASV205	Aquicella_ASV205	Absence	Presence
879	Unclassified_Diplorickettsiaceae_1_ASV3304	Unclassified_Diplorickettsiaceae_1_ASV3304	Absence	Presence
880	Unclassified_Methylomonadaceae_1_ASV3836	Unclassified_Methylomonadaceae_1_ASV3836	Absence	Presence
881	Unknown_Family_Gammaproteobacteria_Incertae_Sedis_11_ASV5005	Unknown_Family_Gammaproteobacteria_Incertae_Sedis_11_ASV5005	Absence	Presence
882	Legionella_ASV1209	Legionella_ASV1209	Absence	Presence
883	Legionella_ASV1222	Legionella_ASV1222	Absence	Presence
884	Legionella_ASV1210	Legionella_ASV1210	Absence	Presence
885	Legionella_ASV1208	Legionella_ASV1208	Absence	Presence
886	Legionella_ASV1229	Legionella_ASV1229	Absence	Presence
887	Legionella_ASV1214	Legionella_ASV1214	Absence	Presence
888	Legionella_ASV1216	Legionella_ASV1216	Absence	Presence
889	Salinibacter_ASV1972	Salinibacter_ASV1972	Absence	Presence
890	Thiomicrorhabdus_ASV2361	Thiomicrorhabdus_ASV2361	Absence	Presence
891	Unclassified_Arcobacteraceae_3_ASV2630	Unclassified_Arcobacteraceae_3_ASV2630	Absence	Presence
892	Unclassified_Arcobacteraceae_2_ASV2629	Unclassified_Arcobacteraceae_2_ASV2629	Absence	Presence
893	Campylobacter_ASV402	Campylobacter_ASV402	Absence	Presence
894	Helicobacter_ASV1084	Helicobacter_ASV1084	Absence	Presence
895	Helicobacter_ASV1088	Helicobacter_ASV1088	Absence	Presence
896	Helicobacter_ASV1082	Helicobacter_ASV1082	Absence	Presence
897	Unclassified_Campylobacterales_3_ASV2987	Unclassified_Campylobacterales_3_ASV2987	Absence	Presence
898	Unclassified_UBA12409_1_ASV4865	Unclassified_UBA12409_1_ASV4865	Absence	Presence
899	Unclassified_Vermiphilaceae_3_ASV4889	Unclassified_Vermiphilaceae_3_ASV4889	Absence	Presence
900	Unclassified_Vermiphilaceae_1_ASV4887	Unclassified_Vermiphilaceae_1_ASV4887	Absence	Presence
901	Unclassified_Saccharimonadales_1_ASV4510	Unclassified_Saccharimonadales_1_ASV4510	Absence	Presence
902	Unclassified_Saccharimonadales_2_ASV4511	Unclassified_Saccharimonadales_2_ASV4511	Absence	Presence
903	Unclassified_Gracilibacteria_1_ASV3592	Unclassified_Gracilibacteria_1_ASV3592	Absence	Presence
904	Unclassified_ABY1_1_ASV2465	Unclassified_ABY1_1_ASV2465	Absence	Presence
905	Candidatus_Peribacteria_ASV463	Candidatus_Peribacteria_ASV463	Absence	Presence
906	Unclassified_Gracilibacteria_2_ASV3593	Unclassified_Gracilibacteria_2_ASV3593	Absence	Presence
907	Candidatus_Yanofskybacteria_ASV490	Candidatus_Yanofskybacteria_ASV490	Absence	Presence
908	Unclassified_Parcubacteria_7_ASV4040	Unclassified_Parcubacteria_7_ASV4040	Absence	Presence
909	Unclassified_Parcubacteria_16_ASV4034	Unclassified_Parcubacteria_16_ASV4034	Absence	Presence
910	Unclassified_Parcubacteria_6_ASV4039	Unclassified_Parcubacteria_6_ASV4039	Absence	Presence
911	Mycoplasma_ASV1440	Mycoplasma_ASV1440	Absence	Presence
912	Mycoplasma_ASV1456	Mycoplasma_ASV1456	Absence	Presence
913	Mycoplasma_ASV1451	Mycoplasma_ASV1451	Absence	Presence
914	Mycoplasma_ASV1453	Mycoplasma_ASV1453	Absence	Presence
915	Mycoplasma_ASV1458	Mycoplasma_ASV1458	Absence	Presence
916	Mycoplasma_ASV1452	Mycoplasma_ASV1452	Absence	Presence
917	Mycoplasma_ASV1442	Mycoplasma_ASV1442	Absence	Presence
918	Brevinema_ASV365	Brevinema_ASV365	Absence	Presence
919	Brevinema_ASV366	Brevinema_ASV366	Absence	Presence
920	Deinococcus_ASV730	Deinococcus_ASV730	Absence	Presence
921	Streptobacillus_ASV2237	Streptobacillus_ASV2237	Absence	Presence
922	Unclassified_Leptotrichiaceae_1_ASV3785	Unclassified_Leptotrichiaceae_1_ASV3785	Absence	Presence
923	Atopostipes_ASV231	Atopostipes_ASV231	Absence	Presence
924	Atopostipes_ASV229	Atopostipes_ASV229	Absence	Presence
925	Alkalibacterium_ASV131	Alkalibacterium_ASV131	Absence	Presence
926	Enterococcus_ASV869	Enterococcus_ASV869	Absence	Presence
927	Bacillus_ASV255	Bacillus_ASV255	Absence	Presence
928	Unclassified_Staphylococcaceae_1_ASV4795	Unclassified_Staphylococcaceae_1_ASV4795	Absence	Presence
929	Staphylococcus_ASV2216	Staphylococcus_ASV2216	Absence	Presence
930	Staphylococcus_ASV2215	Staphylococcus_ASV2215	Absence	Presence
931	Staphylococcus_ASV2222	Staphylococcus_ASV2222	Absence	Presence
932	Unclassified_Staphylococcaceae_2_ASV4796	Unclassified_Staphylococcaceae_2_ASV4796	Absence	Presence
933	Bacillus_ASV259	Bacillus_ASV259	Absence	Presence
934	Bacillus_ASV252	Bacillus_ASV252	Absence	Presence
935	Bacillus_ASV265	Bacillus_ASV265	Absence	Presence
936	Bacillus_ASV256	Bacillus_ASV256	Absence	Presence
937	Bacillus_ASV251	Bacillus_ASV251	Absence	Presence
938	Bacillus_ASV254	Bacillus_ASV254	Absence	Presence
939	Bacillus_ASV253	Bacillus_ASV253	Absence	Presence
940	Gemella_ASV993	Gemella_ASV993	Absence	Presence
941	Gemella_ASV989	Gemella_ASV989	Absence	Presence
942	Gemella_ASV985	Gemella_ASV985	Absence	Presence
943	Gemella_ASV991	Gemella_ASV991	Absence	Presence
944	Unclassified_Bacillaceae_14_ASV2682	Unclassified_Bacillaceae_14_ASV2682	Absence	Presence
945	Unclassified_Marinococcaceae_3_ASV3810	Unclassified_Marinococcaceae_3_ASV3810	Absence	Presence
946	Unclassified_Marinococcaceae_8_ASV3815	Unclassified_Marinococcaceae_8_ASV3815	Absence	Presence
947	Unclassified_Marinococcaceae_1_ASV3808	Unclassified_Marinococcaceae_1_ASV3808	Absence	Presence
948	Unclassified_Marinococcaceae_4_ASV3811	Unclassified_Marinococcaceae_4_ASV3811	Absence	Presence
949	Unclassified_Marinococcaceae_2_ASV3809	Unclassified_Marinococcaceae_2_ASV3809	Absence	Presence
950	Unclassified_Bacillaceae_11_ASV2679	Unclassified_Bacillaceae_11_ASV2679	Absence	Presence
951	Virgibacillus_ASV5068	Virgibacillus_ASV5068	Absence	Presence
952	Bacillus_ASV258	Bacillus_ASV258	Absence	Presence
953	Bacillus_ASV266	Bacillus_ASV266	Absence	Presence
954	Halolactibacillus_ASV1064	Halolactibacillus_ASV1064	Absence	Presence
955	Unclassified_Bacillaceae_8_ASV2692	Unclassified_Bacillaceae_8_ASV2692	Absence	Presence
956	Virgibacillus_ASV5069	Virgibacillus_ASV5069	Absence	Presence
957	Virgibacillus_ASV5074	Virgibacillus_ASV5074	Absence	Presence
958	Oceanobacillus_ASV1532	Oceanobacillus_ASV1532	Absence	Presence
959	Unclassified_Bacillaceae_7_ASV2691	Unclassified_Bacillaceae_7_ASV2691	Absence	Presence
960	Lentibacillus_ASV1232	Lentibacillus_ASV1232	Absence	Presence
961	Unclassified_Bacillaceae_13_ASV2681	Unclassified_Bacillaceae_13_ASV2681	Absence	Presence
962	Oceanobacillus_ASV1530	Oceanobacillus_ASV1530	Absence	Presence
963	Oceanobacillus_ASV1534	Oceanobacillus_ASV1534	Absence	Presence
964	Unclassified_Bacillaceae_12_ASV2680	Unclassified_Bacillaceae_12_ASV2680	Absence	Presence
965	Bacillus_ASV262	Bacillus_ASV262	Absence	Presence
966	Bacillus_ASV249	Bacillus_ASV249	Absence	Presence
967	Unclassified_Planococcaceae_3_ASV4223	Unclassified_Planococcaceae_3_ASV4223	Absence	Presence
968	Unclassified_Planococcaceae_1_ASV4221	Unclassified_Planococcaceae_1_ASV4221	Absence	Presence
969	Granulicatella_ASV1035	Granulicatella_ASV1035	Absence	Presence
970	Trichococcus_ASV2378	Trichococcus_ASV2378	Absence	Presence
971	Trichococcus_ASV2377	Trichococcus_ASV2377	Absence	Presence
972	Trichococcus_ASV2379	Trichococcus_ASV2379	Absence	Presence
973	Weissella_ASV5081	Weissella_ASV5081	Absence	Presence
974	Leuconostoc_ASV1254	Leuconostoc_ASV1254	Absence	Presence
975	Leuconostoc_ASV1252	Leuconostoc_ASV1252	Absence	Presence
976	Unclassified_Lactobacillaceae_1_ASV3714	Unclassified_Lactobacillaceae_1_ASV3714	Absence	Presence
977	Pediococcus_ASV1610	Pediococcus_ASV1610	Absence	Presence
978	Unclassified_Lactobacillaceae_3_ASV3716	Unclassified_Lactobacillaceae_3_ASV3716	Absence	Presence
979	Unclassified_Lactobacillaceae_5_ASV3718	Unclassified_Lactobacillaceae_5_ASV3718	Absence	Presence
980	Lactobacillus_ASV1179	Lactobacillus_ASV1179	Absence	Presence
981	Unclassified_Gastranaerophilales_9_ASV3548	Unclassified_Gastranaerophilales_9_ASV3548	Absence	Presence
982	Unclassified_Cyanobacteriaceae_1_ASV3151	Unclassified_Cyanobacteriaceae_1_ASV3151	Absence	Presence
983	Unclassified_Cyanobacteriales_6_ASV3164	Unclassified_Cyanobacteriales_6_ASV3164	Absence	Presence
984	Unclassified_Cyanobacteriales_3_ASV3161	Unclassified_Cyanobacteriales_3_ASV3161	Absence	Presence
985	Unclassified_Cyanobacteriales_11_ASV3154	Unclassified_Cyanobacteriales_11_ASV3154	Absence	Presence
986	Cyanobacterium_PCC-7202_ASV692	Cyanobacterium_PCC-7202_ASV692	Absence	Presence
987	Unclassified_Nodosilineaceae_4_ASV3982	Unclassified_Nodosilineaceae_4_ASV3982	Absence	Presence
988	Phormidium_MBIC10003_ASV1662	Phormidium_MBIC10003_ASV1662	Absence	Presence
989	Phormidium_MBIC10003_ASV1664	Phormidium_MBIC10003_ASV1664	Absence	Presence
990	Phormidium_MBIC10003_ASV1660	Phormidium_MBIC10003_ASV1660	Absence	Presence
991	Phormidium_MBIC10003_ASV1666	Phormidium_MBIC10003_ASV1666	Absence	Presence
992	Phormidium_MBIC10003_ASV1659	Phormidium_MBIC10003_ASV1659	Absence	Presence
993	Chroococcidiopsis_PCC_7203_ASV546	Chroococcidiopsis_PCC_7203_ASV546	Absence	Presence
994	Unclassified_Cyanobacteriales_1_ASV3152	Unclassified_Cyanobacteriales_1_ASV3152	Absence	Presence
995	Unclassified_Phormidiaceae_1_ASV4102	Unclassified_Phormidiaceae_1_ASV4102	Absence	Presence
996	Unclassified_Cyanobacteriales_14_ASV3157	Unclassified_Cyanobacteriales_14_ASV3157	Absence	Presence
997	Unclassified_Coleofasciculaceae_3_ASV3101	Unclassified_Coleofasciculaceae_3_ASV3101	Absence	Presence
998	Unclassified_Coleofasciculaceae_6_ASV3104	Unclassified_Coleofasciculaceae_6_ASV3104	Absence	Presence
999	Unclassified_Coleofasciculaceae_4_ASV3102	Unclassified_Coleofasciculaceae_4_ASV3102	Absence	Presence
1000	Coleofasciculus_PCC-7420_ASV633	Coleofasciculus_PCC-7420_ASV633	Absence	Presence
1001	Unclassified_Leptolyngbyaceae_15_ASV3774	Unclassified_Leptolyngbyaceae_15_ASV3774	Absence	Presence
1002	Unclassified_Leptolyngbyaceae_13_ASV3772	Unclassified_Leptolyngbyaceae_13_ASV3772	Absence	Presence
1003	Unclassified_Leptolyngbyaceae_8_ASV3781	Unclassified_Leptolyngbyaceae_8_ASV3781	Absence	Presence
1004	Unclassified_Leptolyngbyaceae_12_ASV3771	Unclassified_Leptolyngbyaceae_12_ASV3771	Absence	Presence
1005	Unclassified_Leptolyngbyaceae_5_ASV3778	Unclassified_Leptolyngbyaceae_5_ASV3778	Absence	Presence
1006	Unclassified_Leptolyngbyaceae_6_ASV3779	Unclassified_Leptolyngbyaceae_6_ASV3779	Absence	Presence
1007	Unclassified_Cyanobacteriia_3_ASV3170	Unclassified_Cyanobacteriia_3_ASV3170	Absence	Presence
1008	Scytonema_VB-61278_ASV2051	Scytonema_VB-61278_ASV2051	Absence	Presence
1009	Scytonema_VB-61278_ASV2048	Scytonema_VB-61278_ASV2048	Absence	Presence
1010	Scytonema_VB-61278_ASV2049	Scytonema_VB-61278_ASV2049	Absence	Presence
1011	Scytonema_VB-61278_ASV2045	Scytonema_VB-61278_ASV2045	Absence	Presence
1012	Scytonema_VB-61278_ASV2043	Scytonema_VB-61278_ASV2043	Absence	Presence
1013	Scytonema_VB-61278_ASV2044	Scytonema_VB-61278_ASV2044	Absence	Presence
1014	Calothrix_UAM_374_ASV400	Calothrix_UAM_374_ASV400	Absence	Presence
1015	Cyanobium_PCC-6307_ASV701	Cyanobium_PCC-6307_ASV701	Absence	Presence
1016	Cyanobium_PCC-6307_ASV696	Cyanobium_PCC-6307_ASV696	Absence	Presence
1017	Cyanobium_PCC-6307_ASV710	Cyanobium_PCC-6307_ASV710	Absence	Presence
1018	Cyanobium_PCC-6307_ASV698	Cyanobium_PCC-6307_ASV698	Absence	Presence
1019	Cyanobium_PCC-6307_ASV709	Cyanobium_PCC-6307_ASV709	Absence	Presence
1020	Cyanobium_PCC-6307_ASV695	Cyanobium_PCC-6307_ASV695	Absence	Presence
1021	Cyanobium_PCC-6307_ASV711	Cyanobium_PCC-6307_ASV711	Absence	Presence
1022	Cyanobium_PCC-6307_ASV706	Cyanobium_PCC-6307_ASV706	Absence	Presence
1023	Cyanobium_PCC-6307_ASV704	Cyanobium_PCC-6307_ASV704	Absence	Presence
1024	Cyanobium_PCC-6307_ASV699	Cyanobium_PCC-6307_ASV699	Absence	Presence
1025	Cyanobium_PCC-6307_ASV713	Cyanobium_PCC-6307_ASV713	Absence	Presence
1026	Cyanobium_PCC-6307_ASV700	Cyanobium_PCC-6307_ASV700	Absence	Presence
1027	Cyanobium_PCC-6307_ASV707	Cyanobium_PCC-6307_ASV707	Absence	Presence
1028	Cyanobium_PCC-6307_ASV697	Cyanobium_PCC-6307_ASV697	Absence	Presence
1029	Cyanobium_PCC-6307_ASV708	Cyanobium_PCC-6307_ASV708	Absence	Presence
1030	Nodosilinea_PCC-7104_ASV1504	Nodosilinea_PCC-7104_ASV1504	Absence	Presence
1031	Unclassified_Vampirovibrionales_ASV5037	Unclassified_Vampirovibrionales_ASV5037	Absence	Presence
1032	Unclassified_Gastranaerophilales_1_ASV3537	Unclassified_Gastranaerophilales_1_ASV3537	Absence	Presence
1033	Unclassified_Obscuribacteraceae_4_ASV3992	Unclassified_Obscuribacteraceae_4_ASV3992	Absence	Presence
1034	Unclassified_Obscuribacteraceae_2_ASV3990	Unclassified_Obscuribacteraceae_2_ASV3990	Absence	Presence
1035	Unclassified_Sericytochromatia_1_ASV4712	Unclassified_Sericytochromatia_1_ASV4712	Absence	Presence
1036	Unclassified_Acidaminococcaceae_1_ASV2478	Unclassified_Acidaminococcaceae_1_ASV2478	Absence	Presence
1037	Veillonella_ASV5038	Veillonella_ASV5038	Absence	Presence
1038	Erysipelatoclostridium_ASV881	Erysipelatoclostridium_ASV881	Absence	Presence
1039	Erysipelatoclostridium_ASV879	Erysipelatoclostridium_ASV879	Absence	Presence
1040	Erysipelothrix_ASV882	Erysipelothrix_ASV882	Absence	Presence
1041	Streptococcus_ASV2255	Streptococcus_ASV2255	Absence	Presence
1042	Streptococcus_ASV2253	Streptococcus_ASV2253	Absence	Presence
1043	Streptococcus_ASV2239	Streptococcus_ASV2239	Absence	Presence
1044	Lactococcus_ASV1181	Lactococcus_ASV1181	Absence	Presence
1045	Ureaplasma_ASV5032	Ureaplasma_ASV5032	Absence	Presence
1046	Ureaplasma_ASV5029	Ureaplasma_ASV5029	Absence	Presence
1047	Ureaplasma_ASV5028	Ureaplasma_ASV5028	Absence	Presence
1048	Ureaplasma_ASV5027	Ureaplasma_ASV5027	Absence	Presence
1049	Unclassified_RF39_22_ASV4284	Unclassified_RF39_22_ASV4284	Absence	Presence
1050	Unclassified_RF39_19_ASV4280	Unclassified_RF39_19_ASV4280	Absence	Presence
1051	Unclassified_Anaerovoracaceae_2_ASV2627	Unclassified_Anaerovoracaceae_2_ASV2627	Absence	Presence
1052	[Eubacterium]_nodatum_group_ASV8	[Eubacterium]_nodatum_group_ASV8	Absence	Presence
1053	Family_XIII_UCG-001_ASV917	Family_XIII_UCG-001_ASV917	Absence	Presence
1054	Gallicola_ASV983	Gallicola_ASV983	Absence	Presence
1055	Anaerococcus_ASV180	Anaerococcus_ASV180	Absence	Presence
1056	Anaerococcus_ASV185	Anaerococcus_ASV185	Absence	Presence
1057	Anaerococcus_ASV176	Anaerococcus_ASV176	Absence	Presence
1058	Anaerococcus_ASV182	Anaerococcus_ASV182	Absence	Presence
1059	Anaerococcus_ASV186	Anaerococcus_ASV186	Absence	Presence
1060	Anaerococcus_ASV177	Anaerococcus_ASV177	Absence	Presence
1061	Anaerococcus_ASV181	Anaerococcus_ASV181	Absence	Presence
1062	Anaerococcus_ASV184	Anaerococcus_ASV184	Absence	Presence
1063	Helcococcus_ASV1080	Helcococcus_ASV1080	Absence	Presence
1064	Finegoldia_ASV930	Finegoldia_ASV930	Absence	Presence
1065	Peptoniphilus_ASV1622	Peptoniphilus_ASV1622	Absence	Presence
1066	Peptoniphilus_ASV1624	Peptoniphilus_ASV1624	Absence	Presence
1067	Peptoniphilus_ASV1620	Peptoniphilus_ASV1620	Absence	Presence
1068	Peptoniphilus_ASV1621	Peptoniphilus_ASV1621	Absence	Presence
1069	Peptoniphilus_ASV1625	Peptoniphilus_ASV1625	Absence	Presence
1070	Tissierella_ASV2367	Tissierella_ASV2367	Absence	Presence
1071	Tissierella_ASV2368	Tissierella_ASV2368	Absence	Presence
1072	Candidatus_Tammella_ASV473	Candidatus_Tammella_ASV473	Absence	Presence
1073	Unclassified_Synergistaceae_5_ASV4837	Unclassified_Synergistaceae_5_ASV4837	Absence	Presence
1074	Unclassified_Synergistaceae_4_ASV4836	Unclassified_Synergistaceae_4_ASV4836	Absence	Presence
1075	Unclassified_Synergistaceae_2_ASV4834	Unclassified_Synergistaceae_2_ASV4834	Absence	Presence
1076	Unclassified_Synergistaceae_3_ASV4835	Unclassified_Synergistaceae_3_ASV4835	Absence	Presence
1077	Unclassified_Synergistaceae_1_ASV4833	Unclassified_Synergistaceae_1_ASV4833	Absence	Presence
1078	Anaerofustis_ASV190	Anaerofustis_ASV190	Absence	Presence
1079	Unclassified_Peptococcaceae_2_ASV4094	Unclassified_Peptococcaceae_2_ASV4094	Absence	Presence
1080	Unclassified_Peptococcaceae_3_ASV4095	Unclassified_Peptococcaceae_3_ASV4095	Absence	Presence
1081	Paenibacillus_ASV1575	Paenibacillus_ASV1575	Absence	Presence
1082	Paenibacillus_ASV1574	Paenibacillus_ASV1574	Absence	Presence
1083	Unclassified_Clostridia_5_ASV3083	Unclassified_Clostridia_5_ASV3083	Absence	Presence
1084	Peptostreptococcus_ASV1628	Peptostreptococcus_ASV1628	Absence	Presence
1085	Peptostreptococcus_ASV1627	Peptostreptococcus_ASV1627	Absence	Presence
1086	Terrisporobacter_ASV2344	Terrisporobacter_ASV2344	Absence	Presence
1087	Romboutsia_ASV1898	Romboutsia_ASV1898	Absence	Presence
1088	Paeniclostridium_ASV1577	Paeniclostridium_ASV1577	Absence	Presence
1089	Sedimentibacter_ASV2052	Sedimentibacter_ASV2052	Absence	Presence
1090	Clostridiisalibacter_ASV564	Clostridiisalibacter_ASV564	Absence	Presence
1091	Unclassified_Clostridia_UCG-014_7_ASV3095	Unclassified_Clostridia_UCG-014_7_ASV3095	Absence	Presence
1092	Defluviitaleaceae_UCG-011_ASV729	Defluviitaleaceae_UCG-011_ASV729	Absence	Presence
1093	Tyzzerella_ASV2399	Tyzzerella_ASV2399	Absence	Presence
1094	Tyzzerella_ASV2396	Tyzzerella_ASV2396	Absence	Presence
1095	Lachnospiraceae_UCG-008_ASV1169	Lachnospiraceae_UCG-008_ASV1169	Absence	Presence
1096	Unclassified_Lachnospiraceae_27_ASV3701	Unclassified_Lachnospiraceae_27_ASV3701	Absence	Presence
1097	Unclassified_Lachnospiraceae_17_ASV3690	Unclassified_Lachnospiraceae_17_ASV3690	Absence	Presence
1098	Lachnospiraceae_AC2044_group_ASV1161	Lachnospiraceae_AC2044_group_ASV1161	Absence	Presence
1099	Unclassified_Lachnospiraceae_4_ASV3707	Unclassified_Lachnospiraceae_4_ASV3707	Absence	Presence
1100	GCA-900066575_ASV984	GCA-900066575_ASV984	Absence	Presence
1101	Unclassified_Lachnospiraceae_13_ASV3686	Unclassified_Lachnospiraceae_13_ASV3686	Absence	Presence
1102	Unclassified_Lachnospiraceae_12_ASV3685	Unclassified_Lachnospiraceae_12_ASV3685	Absence	Presence
1103	Unclassified_Lachnospiraceae_3_ASV3704	Unclassified_Lachnospiraceae_3_ASV3704	Absence	Presence
1104	Unclassified_Lachnospiraceae_29_ASV3703	Unclassified_Lachnospiraceae_29_ASV3703	Absence	Presence
1105	Unclassified_Lachnospiraceae_11_ASV3684	Unclassified_Lachnospiraceae_11_ASV3684	Absence	Presence
1106	Unclassified_Lachnospiraceae_1_ASV3682	Unclassified_Lachnospiraceae_1_ASV3682	Absence	Presence
1107	Lachnoanaerobaculum_ASV1150	Lachnoanaerobaculum_ASV1150	Absence	Presence
1108	Lachnoclostridium_ASV1151	Lachnoclostridium_ASV1151	Absence	Presence
1109	Blautia_ASV342	Blautia_ASV342	Absence	Presence
1110	Lachnoclostridium_ASV1157	Lachnoclostridium_ASV1157	Absence	Presence
1111	Lachnoclostridium_ASV1156	Lachnoclostridium_ASV1156	Absence	Presence
1112	Lachnoclostridium_ASV1152	Lachnoclostridium_ASV1152	Absence	Presence
1113	Lachnoclostridium_ASV1158	Lachnoclostridium_ASV1158	Absence	Presence
1114	Roseburia_ASV1901	Roseburia_ASV1901	Absence	Presence
1115	Defluviitaleaceae_UCG-011_ASV727	Defluviitaleaceae_UCG-011_ASV727	Absence	Presence
1116	UCG-005_ASV2407	UCG-005_ASV2407	Absence	Presence
1117	Unclassified_Oscillospiraceae_3_ASV4019	Unclassified_Oscillospiraceae_3_ASV4019	Absence	Presence
1118	Unclassified_Hungateiclostridiaceae_2_ASV3616	Unclassified_Hungateiclostridiaceae_2_ASV3616	Absence	Presence
1119	Unclassified_[Eubacterium]_coprostanoligenes_group_1_ASV2416	Unclassified_[Eubacterium]_coprostanoligenes_group_1_ASV2416	Absence	Presence
1120	Unclassified_[Eubacterium]_coprostanoligenes_group_3_ASV2418	Unclassified_[Eubacterium]_coprostanoligenes_group_3_ASV2418	Absence	Presence
1121	Faecalibacterium_ASV914	Faecalibacterium_ASV914	Absence	Presence
1122	Unclassified_Ruminococcaceae_4_ASV4501	Unclassified_Ruminococcaceae_4_ASV4501	Absence	Presence
1123	Unclassified_Ruminococcaceae_5_ASV4502	Unclassified_Ruminococcaceae_5_ASV4502	Absence	Presence
1124	Unclassified_Oscillospirales_1_ASV4021	Unclassified_Oscillospirales_1_ASV4021	Absence	Presence
1125	Candidatus_Soleaferrea_ASV472	Candidatus_Soleaferrea_ASV472	Absence	Presence
1126	Unclassified_Ruminococcaceae_1_ASV4489	Unclassified_Ruminococcaceae_1_ASV4489	Absence	Presence
1127	Candidatus_Soleaferrea_ASV468	Candidatus_Soleaferrea_ASV468	Absence	Presence
1128	Candidatus_Soleaferrea_ASV471	Candidatus_Soleaferrea_ASV471	Absence	Presence
1129	Candidatus_Soleaferrea_ASV469	Candidatus_Soleaferrea_ASV469	Absence	Presence
1130	Unclassified_Oscillospiraceae_4_ASV4020	Unclassified_Oscillospiraceae_4_ASV4020	Absence	Presence
1131	Unclassified_Oscillospiraceae_2_ASV4018	Unclassified_Oscillospiraceae_2_ASV4018	Absence	Presence
1132	Fastidiosipila_ASV918	Fastidiosipila_ASV918	Absence	Presence
1133	Unclassified_UCG-010_ASV2409	Unclassified_UCG-010_ASV2409	Absence	Presence
1134	Clostridium_sensu_stricto_1_ASV600	Clostridium_sensu_stricto_1_ASV600	Absence	Presence
1135	Clostridium_sensu_stricto_1_ASV609	Clostridium_sensu_stricto_1_ASV609	Absence	Presence
1136	Clostridium_sensu_stricto_1_ASV603	Clostridium_sensu_stricto_1_ASV603	Absence	Presence
1137	Clostridium_sensu_stricto_1_ASV572	Clostridium_sensu_stricto_1_ASV572	Absence	Presence
1138	Clostridium_sensu_stricto_1_ASV591	Clostridium_sensu_stricto_1_ASV591	Absence	Presence
1139	Clostridium_sensu_stricto_1_ASV571	Clostridium_sensu_stricto_1_ASV571	Absence	Presence
1140	Clostridium_sensu_stricto_1_ASV621	Clostridium_sensu_stricto_1_ASV621	Absence	Presence
1141	Clostridium_sensu_stricto_1_ASV625	Clostridium_sensu_stricto_1_ASV625	Absence	Presence
1142	Clostridium_sensu_stricto_1_ASV605	Clostridium_sensu_stricto_1_ASV605	Absence	Presence
1143	Clostridium_sensu_stricto_1_ASV619	Clostridium_sensu_stricto_1_ASV619	Absence	Presence
1144	Clostridium_sensu_stricto_1_ASV611	Clostridium_sensu_stricto_1_ASV611	Absence	Presence
1145	Christensenellaceae_R-7_group_ASV535	Christensenellaceae_R-7_group_ASV535	Absence	Presence
1146	Christensenellaceae_R-7_group_ASV539	Christensenellaceae_R-7_group_ASV539	Absence	Presence
1147	Christensenellaceae_R-7_group_ASV541	Christensenellaceae_R-7_group_ASV541	Absence	Presence
1148	Christensenellaceae_R-7_group_ASV525	Christensenellaceae_R-7_group_ASV525	Absence	Presence
1149	Christensenellaceae_R-7_group_ASV517	Christensenellaceae_R-7_group_ASV517	Absence	Presence
1150	Unclassified_CPR2_ASV684	Unclassified_CPR2_ASV684	Absence	Presence
1151	Peptococcus_ASV1619	Peptococcus_ASV1619	Absence	Presence

## Sheet: Structural_zero_femal_tIgG_high
	Taxon	species	Low	High
1	Unclassified_Calditrichaceae_6_ASV2976	Unclassified_Calditrichaceae_6_ASV2976	Presence	Absence
2	Unclassified_Fibrobacterales_3_ASV3382	Unclassified_Fibrobacterales_3_ASV3382	Presence	Absence
3	Unclassified_Balneolaceae_16_ASV2764	Unclassified_Balneolaceae_16_ASV2764	Presence	Absence
4	Unclassified_Balneolaceae_62_ASV2815	Unclassified_Balneolaceae_62_ASV2815	Presence	Absence
5	Unclassified_Balneolaceae_4_ASV2790	Unclassified_Balneolaceae_4_ASV2790	Presence	Absence
6	Unclassified_Balneolaceae_5_ASV2801	Unclassified_Balneolaceae_5_ASV2801	Presence	Absence
7	Unclassified_Balneolaceae_12_ASV2760	Unclassified_Balneolaceae_12_ASV2760	Presence	Absence
8	Mucilaginibacter_ASV1414	Mucilaginibacter_ASV1414	Presence	Absence
9	Unclassified_Sphingobacteriaceae_3_ASV4744	Unclassified_Sphingobacteriaceae_3_ASV4744	Presence	Absence
10	Unclassified_Cryomorphaceae_3_ASV3147	Unclassified_Cryomorphaceae_3_ASV3147	Presence	Absence
11	Unclassified_Bacteroidales_RF16_group_ASV268	Unclassified_Bacteroidales_RF16_group_ASV268	Presence	Absence
12	Unclassified_NS11-12_marine_group_2_ASV3986	Unclassified_NS11-12_marine_group_2_ASV3986	Presence	Absence
13	Unclassified_Bacteroidia_6_ASV2756	Unclassified_Bacteroidia_6_ASV2756	Presence	Absence
14	Unclassified_Sphingobacteriales_2_ASV4746	Unclassified_Sphingobacteriales_2_ASV4746	Presence	Absence
15	Unclassified_Marinilabiliaceae_14_ASV3797	Unclassified_Marinilabiliaceae_14_ASV3797	Presence	Absence
16	Unclassified_Bacteroidales_1_ASV2709	Unclassified_Bacteroidales_1_ASV2709	Presence	Absence
17	Unclassified_Lentimicrobiaceae_3_ASV3760	Unclassified_Lentimicrobiaceae_3_ASV3760	Presence	Absence
18	Phaeodactylibacter_ASV1650	Phaeodactylibacter_ASV1650	Presence	Absence
19	Unclassified_Saprospiraceae_7_ASV4580	Unclassified_Saprospiraceae_7_ASV4580	Presence	Absence
20	Phaeodactylibacter_ASV1642	Phaeodactylibacter_ASV1642	Presence	Absence
21	Unclassified_Saprospiraceae_18_ASV4535	Unclassified_Saprospiraceae_18_ASV4535	Presence	Absence
22	Unclassified_Chitinophagaceae_1_ASV3010	Unclassified_Chitinophagaceae_1_ASV3010	Presence	Absence
23	Flavisolibacter_ASV940	Flavisolibacter_ASV940	Presence	Absence
24	Unclassified_Chitinophagaceae_5_ASV3028	Unclassified_Chitinophagaceae_5_ASV3028	Presence	Absence
25	Flavisolibacter_ASV943	Flavisolibacter_ASV943	Presence	Absence
26	Flavisolibacter_ASV942	Flavisolibacter_ASV942	Presence	Absence
27	Unclassified_Chitinophagales_1_ASV3033	Unclassified_Chitinophagales_1_ASV3033	Presence	Absence
28	Unclassified_Chitinophagaceae_22_ASV3024	Unclassified_Chitinophagaceae_22_ASV3024	Presence	Absence
29	Unclassified_Sphingobacteriales_1_ASV4745	Unclassified_Sphingobacteriales_1_ASV4745	Presence	Absence
30	Unclassified_SB-5_11_ASV4606	Unclassified_SB-5_11_ASV4606	Presence	Absence
31	Unclassified_Bacteroidales_3_ASV2717	Unclassified_Bacteroidales_3_ASV2717	Presence	Absence
32	Unclassified_Bacteroidetes_BD2-2_8_ASV2747	Unclassified_Bacteroidetes_BD2-2_8_ASV2747	Presence	Absence
33	Unclassified_SB-5_12_ASV4607	Unclassified_SB-5_12_ASV4607	Presence	Absence
34	NS5_marine_group_ASV1523	NS5_marine_group_ASV1523	Presence	Absence
35	Unclassified_Flavobacteriales_1_ASV3451	Unclassified_Flavobacteriales_1_ASV3451	Presence	Absence
36	Unclassified_Flavobacteriaceae_57_ASV3444	Unclassified_Flavobacteriaceae_57_ASV3444	Presence	Absence
37	Elizabethkingia_ASV857	Elizabethkingia_ASV857	Presence	Absence
38	Bergeyella_ASV314	Bergeyella_ASV314	Presence	Absence
39	Unclassified_Weeksellaceae_11_ASV4932	Unclassified_Weeksellaceae_11_ASV4932	Presence	Absence
40	Unclassified_Weeksellaceae_2_ASV4935	Unclassified_Weeksellaceae_2_ASV4935	Presence	Absence
41	Unclassified_Weeksellaceae_4_ASV4937	Unclassified_Weeksellaceae_4_ASV4937	Presence	Absence
42	Apibacter_ASV195	Apibacter_ASV195	Presence	Absence
43	Unclassified_Weeksellaceae_9_ASV4942	Unclassified_Weeksellaceae_9_ASV4942	Presence	Absence
44	Flavobacterium_ASV951	Flavobacterium_ASV951	Presence	Absence
45	Flavobacterium_ASV953	Flavobacterium_ASV953	Presence	Absence
46	Flavobacterium_ASV947	Flavobacterium_ASV947	Presence	Absence
47	Unclassified_Flavobacteriaceae_42_ASV3428	Unclassified_Flavobacteriaceae_42_ASV3428	Presence	Absence
48	Capnocytophaga_ASV493	Capnocytophaga_ASV493	Presence	Absence
49	Capnocytophaga_ASV491	Capnocytophaga_ASV491	Presence	Absence
50	Unclassified_Flavobacteriaceae_24_ASV3408	Unclassified_Flavobacteriaceae_24_ASV3408	Presence	Absence
51	Unclassified_F082_2_ASV3375	Unclassified_F082_2_ASV3375	Presence	Absence
52	Rikenellaceae_RC9_gut_group_ASV1881	Rikenellaceae_RC9_gut_group_ASV1881	Presence	Absence
53	Rikenellaceae_RC9_gut_group_ASV1884	Rikenellaceae_RC9_gut_group_ASV1884	Presence	Absence
54	Rikenellaceae_RC9_gut_group_ASV1883	Rikenellaceae_RC9_gut_group_ASV1883	Presence	Absence
55	Rikenellaceae_RC9_gut_group_ASV1879	Rikenellaceae_RC9_gut_group_ASV1879	Presence	Absence
56	Rikenellaceae_RC9_gut_group_ASV1880	Rikenellaceae_RC9_gut_group_ASV1880	Presence	Absence
57	Rikenellaceae_RC9_gut_group_ASV1882	Rikenellaceae_RC9_gut_group_ASV1882	Presence	Absence
58	Rikenellaceae_RC9_gut_group_ASV1878	Rikenellaceae_RC9_gut_group_ASV1878	Presence	Absence
59	Rikenellaceae_RC9_gut_group_ASV1877	Rikenellaceae_RC9_gut_group_ASV1877	Presence	Absence
60	Unclassified_F082_3_ASV3376	Unclassified_F082_3_ASV3376	Presence	Absence
61	Unclassified_F082_1_ASV3374	Unclassified_F082_1_ASV3374	Presence	Absence
62	Unclassified_p-251-o5_ASV1560	Unclassified_p-251-o5_ASV1560	Presence	Absence
63	Prevotellaceae_UCG-003_ASV1723	Prevotellaceae_UCG-003_ASV1723	Presence	Absence
64	Prevotellaceae_UCG-003_ASV1722	Prevotellaceae_UCG-003_ASV1722	Presence	Absence
65	Prevotella_9_ASV1717	Prevotella_9_ASV1717	Presence	Absence
66	Prevotella_7_ASV1715	Prevotella_7_ASV1715	Presence	Absence
67	Prevotella_ASV1714	Prevotella_ASV1714	Presence	Absence
68	Prevotella_7_ASV1716	Prevotella_7_ASV1716	Presence	Absence
69	Proteiniphilum_ASV1730	Proteiniphilum_ASV1730	Presence	Absence
70	Dysgonomonas_ASV854	Dysgonomonas_ASV854	Presence	Absence
71	Bacteroides_ASV276	Bacteroides_ASV276	Presence	Absence
72	Prevotellaceae_UCG-004_ASV1724	Prevotellaceae_UCG-004_ASV1724	Presence	Absence
73	Prevotellaceae_UCG-004_ASV1725	Prevotellaceae_UCG-004_ASV1725	Presence	Absence
74	Prevotellaceae_UCG-004_ASV1726	Prevotellaceae_UCG-004_ASV1726	Presence	Absence
75	Bacteroides_ASV270	Bacteroides_ASV270	Presence	Absence
76	Unclassified_Dysgonomonadaceae_1_ASV3311	Unclassified_Dysgonomonadaceae_1_ASV3311	Presence	Absence
77	Unclassified_Muribaculaceae_4_ASV3909	Unclassified_Muribaculaceae_4_ASV3909	Presence	Absence
78	Unclassified_Cyclobacteriaceae_2_ASV3183	Unclassified_Cyclobacteriaceae_2_ASV3183	Presence	Absence
79	Hymenobacter_ASV1106	Hymenobacter_ASV1106	Presence	Absence
80	Hymenobacter_ASV1107	Hymenobacter_ASV1107	Presence	Absence
81	Adhaeribacter_ASV90	Adhaeribacter_ASV90	Presence	Absence
82	Persicitalea_ASV1633	Persicitalea_ASV1633	Presence	Absence
83	Dyadobacter_ASV852	Dyadobacter_ASV852	Presence	Absence
84	Unclassified_Spirosomaceae_1_ASV4778	Unclassified_Spirosomaceae_1_ASV4778	Presence	Absence
85	Unclassified_Microscillaceae_2_ASV3872	Unclassified_Microscillaceae_2_ASV3872	Presence	Absence
86	Unclassified_Flavobacteriales_2_ASV3452	Unclassified_Flavobacteriales_2_ASV3452	Presence	Absence
87	Unclassified_Cyclobacteriaceae_24_ASV3188	Unclassified_Cyclobacteriaceae_24_ASV3188	Presence	Absence
88	Unclassified_Cytophagales_4_ASV3209	Unclassified_Cytophagales_4_ASV3209	Presence	Absence
89	Unclassified_Cyclobacteriaceae_15_ASV3178	Unclassified_Cyclobacteriaceae_15_ASV3178	Presence	Absence
90	Unclassified_Rhodothermaceae_4_ASV4476	Unclassified_Rhodothermaceae_4_ASV4476	Presence	Absence
91	Salinibacter_ASV1975	Salinibacter_ASV1975	Presence	Absence
92	Salisaeta_ASV2027	Salisaeta_ASV2027	Presence	Absence
93	Salisaeta_ASV2028	Salisaeta_ASV2028	Presence	Absence
94	Unclassified_Zixibacteria_29_ASV4994	Unclassified_Zixibacteria_29_ASV4994	Presence	Absence
95	Unclassified_Latescibacterota_2_ASV3737	Unclassified_Latescibacterota_2_ASV3737	Presence	Absence
96	Unclassified_Zixibacteria_7_ASV4999	Unclassified_Zixibacteria_7_ASV4999	Presence	Absence
97	Unclassified_WCHB1-41_6_ASV4918	Unclassified_WCHB1-41_6_ASV4918	Presence	Absence
98	Unclassified_Desulfobacterales_2_ASV3234	Unclassified_Desulfobacterales_2_ASV3234	Presence	Absence
99	Candidatus_Omnitrophus_ASV452	Candidatus_Omnitrophus_ASV452	Presence	Absence
100	Candidatus_Omnitrophus_ASV451	Candidatus_Omnitrophus_ASV451	Presence	Absence
101	Unclassified_Latescibacterota_11_ASV3735	Unclassified_Latescibacterota_11_ASV3735	Presence	Absence
102	Sediminispirochaeta_ASV2056	Sediminispirochaeta_ASV2056	Presence	Absence
103	Spirochaeta_ASV2152	Spirochaeta_ASV2152	Presence	Absence
104	Spirochaeta_2_ASV2177	Spirochaeta_2_ASV2177	Presence	Absence
105	Spirochaeta_2_ASV2204	Spirochaeta_2_ASV2204	Presence	Absence
106	Spirochaeta_ASV2158	Spirochaeta_ASV2158	Presence	Absence
107	Spirochaeta_ASV2149	Spirochaeta_ASV2149	Presence	Absence
108	Unclassified_Spirochaetaceae_2_ASV4770	Unclassified_Spirochaetaceae_2_ASV4770	Presence	Absence
109	Spirochaeta_2_ASV2212	Spirochaeta_2_ASV2212	Presence	Absence
110	Spirochaeta_2_ASV2211	Spirochaeta_2_ASV2211	Presence	Absence
111	Treponema_ASV2375	Treponema_ASV2375	Presence	Absence
112	Treponema_ASV2374	Treponema_ASV2374	Presence	Absence
113	Unclassified_Simkaniaceae_3_ASV4727	Unclassified_Simkaniaceae_3_ASV4727	Presence	Absence
114	Unclassified_Simkaniaceae_1_ASV4725	Unclassified_Simkaniaceae_1_ASV4725	Presence	Absence
115	Neochlamydia_ASV1472	Neochlamydia_ASV1472	Presence	Absence
116	Candidatus_Protochlamydia_ASV464	Candidatus_Protochlamydia_ASV464	Presence	Absence
117	Unclassified_Parachlamydiaceae_4_ASV4025	Unclassified_Parachlamydiaceae_4_ASV4025	Presence	Absence
118	Unclassified_SG8-4_6_ASV4720	Unclassified_SG8-4_6_ASV4720	Presence	Absence
119	Unclassified_4572-13_2_ASV2427	Unclassified_4572-13_2_ASV2427	Presence	Absence
120	CL500-3_ASV562	CL500-3_ASV562	Presence	Absence
121	Urania-1B-19_marine_sediment_group_ASV5025	Urania-1B-19_marine_sediment_group_ASV5025	Presence	Absence
122	SM1A02_ASV2098	SM1A02_ASV2098	Presence	Absence
123	SM1A02_ASV2094	SM1A02_ASV2094	Presence	Absence
124	SM1A02_ASV2096	SM1A02_ASV2096	Presence	Absence
125	SM1A02_ASV2095	SM1A02_ASV2095	Presence	Absence
126	Unclassified_WD2101_soil_group_2_ASV4923	Unclassified_WD2101_soil_group_2_ASV4923	Presence	Absence
127	Unclassified_mle1-8_5_ASV3891	Unclassified_mle1-8_5_ASV3891	Presence	Absence
128	Unclassified_CCM11a_4_ASV3002	Unclassified_CCM11a_4_ASV3002	Presence	Absence
129	Unclassified_Isosphaeraceae_7_ASV3649	Unclassified_Isosphaeraceae_7_ASV3649	Presence	Absence
130	Unclassified_Isosphaeraceae_1_ASV3643	Unclassified_Isosphaeraceae_1_ASV3643	Presence	Absence
131	Tundrisphaera_ASV2390	Tundrisphaera_ASV2390	Presence	Absence
132	Unclassified_Gemmataceae_9_ASV3570	Unclassified_Gemmataceae_9_ASV3570	Presence	Absence
133	Fimbriiglobus_ASV929	Fimbriiglobus_ASV929	Presence	Absence
134	Fimbriiglobus_ASV924	Fimbriiglobus_ASV924	Presence	Absence
135	Fimbriiglobus_ASV927	Fimbriiglobus_ASV927	Presence	Absence
136	Fimbriiglobus_ASV926	Fimbriiglobus_ASV926	Presence	Absence
137	Zavarzinella_ASV5115	Zavarzinella_ASV5115	Presence	Absence
138	Gemmata_ASV998	Gemmata_ASV998	Presence	Absence
139	Gemmata_ASV997	Gemmata_ASV997	Presence	Absence
140	Rubinisphaera_ASV1933	Rubinisphaera_ASV1933	Presence	Absence
141	SH-PL14_ASV2081	SH-PL14_ASV2081	Presence	Absence
142	Unclassified_Planctomycetales_17_ASV4191	Unclassified_Planctomycetales_17_ASV4191	Presence	Absence
143	Planctopirus_ASV1698	Planctopirus_ASV1698	Presence	Absence
144	p-1088-a5_gut_group_ASV1556	p-1088-a5_gut_group_ASV1556	Presence	Absence
145	p-1088-a5_gut_group_ASV1558	p-1088-a5_gut_group_ASV1558	Presence	Absence
146	p-1088-a5_gut_group_ASV1557	p-1088-a5_gut_group_ASV1557	Presence	Absence
147	p-1088-a5_gut_group_ASV1554	p-1088-a5_gut_group_ASV1554	Presence	Absence
148	p-1088-a5_gut_group_ASV1559	p-1088-a5_gut_group_ASV1559	Presence	Absence
149	p-1088-a5_gut_group_ASV1555	p-1088-a5_gut_group_ASV1555	Presence	Absence
150	Unclassified_Pirellulaceae_4_ASV4147	Unclassified_Pirellulaceae_4_ASV4147	Presence	Absence
151	Pir4_lineage_ASV1683	Pir4_lineage_ASV1683	Presence	Absence
152	Rhodopirellula_ASV1860	Rhodopirellula_ASV1860	Presence	Absence
153	Blastopirellula_ASV337	Blastopirellula_ASV337	Presence	Absence
154	Pirellula_ASV1688	Pirellula_ASV1688	Presence	Absence
155	Pirellula_ASV1685	Pirellula_ASV1685	Presence	Absence
156	Pirellula_ASV1687	Pirellula_ASV1687	Presence	Absence
157	Pirellula_ASV1694	Pirellula_ASV1694	Presence	Absence
158	Unclassified_Pirellulaceae_3_ASV4146	Unclassified_Pirellulaceae_3_ASV4146	Presence	Absence
159	Unclassified_Pirellulaceae_6_ASV4149	Unclassified_Pirellulaceae_6_ASV4149	Presence	Absence
160	Unclassified_Pirellulaceae_12_ASV4128	Unclassified_Pirellulaceae_12_ASV4128	Presence	Absence
161	Unclassified_Pirellulaceae_24_ASV4141	Unclassified_Pirellulaceae_24_ASV4141	Presence	Absence
162	Unclassified_Pirellulaceae_11_ASV4127	Unclassified_Pirellulaceae_11_ASV4127	Presence	Absence
163	Unclassified_Pirellulaceae_15_ASV4131	Unclassified_Pirellulaceae_15_ASV4131	Presence	Absence
164	Unclassified_Planctomycetota_3_ASV4214	Unclassified_Planctomycetota_3_ASV4214	Presence	Absence
165	Unclassified_OM190_2_ASV4007	Unclassified_OM190_2_ASV4007	Presence	Absence
166	Unclassified_Pla3_lineage_12_ASV4158	Unclassified_Pla3_lineage_12_ASV4158	Presence	Absence
167	Unclassified_Acidobacteriota_1_ASV2485	Unclassified_Acidobacteriota_1_ASV2485	Presence	Absence
168	Verruc-01_ASV5043	Verruc-01_ASV5043	Presence	Absence
169	Opitutus_ASV1552	Opitutus_ASV1552	Presence	Absence
170	Unclassified_Latescibacteraceae_7_ASV3730	Unclassified_Latescibacteraceae_7_ASV3730	Presence	Absence
171	Lentisphaera_ASV1235	Lentisphaera_ASV1235	Presence	Absence
172	Unclassified_Aminicenantales_2_ASV2581	Unclassified_Aminicenantales_2_ASV2581	Presence	Absence
173	Unclassified_Pedosphaeraceae_3_ASV4081	Unclassified_Pedosphaeraceae_3_ASV4081	Presence	Absence
174	Unclassified_Verrucomicrobiaceae_2_ASV4895	Unclassified_Verrucomicrobiaceae_2_ASV4895	Presence	Absence
175	Luteolibacter_ASV1282	Luteolibacter_ASV1282	Presence	Absence
176	Luteolibacter_ASV1288	Luteolibacter_ASV1288	Presence	Absence
177	Unclassified_Rubritaleaceae_2_ASV4488	Unclassified_Rubritaleaceae_2_ASV4488	Presence	Absence
178	Terrimicrobium_ASV2340	Terrimicrobium_ASV2340	Presence	Absence
179	LD29_ASV1197	LD29_ASV1197	Presence	Absence
180	LD29_ASV1201	LD29_ASV1201	Presence	Absence
181	LD29_ASV1198	LD29_ASV1198	Presence	Absence
182	Unclassified_Terrimicrobiaceae_1_ASV4848	Unclassified_Terrimicrobiaceae_1_ASV4848	Presence	Absence
183	Terrimicrobium_ASV2337	Terrimicrobium_ASV2337	Presence	Absence
184	Terrimicrobium_ASV2335	Terrimicrobium_ASV2335	Presence	Absence
185	Candidatus_Udaeobacter_ASV486	Candidatus_Udaeobacter_ASV486	Presence	Absence
186	Unclassified_Subgroup_22_5_ASV4808	Unclassified_Subgroup_22_5_ASV4808	Presence	Absence
187	Unclassified_Blastocatellaceae_3_ASV2914	Unclassified_Blastocatellaceae_3_ASV2914	Presence	Absence
188	Unclassified_Gitt-GS-136_1_ASV3589	Unclassified_Gitt-GS-136_1_ASV3589	Presence	Absence
189	Unclassified_TK10_3_ASV4863	Unclassified_TK10_3_ASV4863	Presence	Absence
190	FFCH7168_ASV919	FFCH7168_ASV919	Presence	Absence
191	Candidatus_Chlorothrix_ASV427	Candidatus_Chlorothrix_ASV427	Presence	Absence
192	Unclassified_Chloroflexaceae_1_ASV3044	Unclassified_Chloroflexaceae_1_ASV3044	Presence	Absence
193	Unclassified_Chloroflexaceae_2_ASV3045	Unclassified_Chloroflexaceae_2_ASV3045	Presence	Absence
194	Candidatus_Chloroploca_ASV419	Candidatus_Chloroploca_ASV419	Presence	Absence
195	Unclassified_SBR1031_82_ASV4706	Unclassified_SBR1031_82_ASV4706	Presence	Absence
196	Unclassified_SBR1031_9_ASV4711	Unclassified_SBR1031_9_ASV4711	Presence	Absence
197	Unclassified_A4b_3_ASV2452	Unclassified_A4b_3_ASV2452	Presence	Absence
198	Unclassified_SBR1031_12_ASV4629	Unclassified_SBR1031_12_ASV4629	Presence	Absence
199	Unclassified_A4b_29_ASV2451	Unclassified_A4b_29_ASV2451	Presence	Absence
200	Unclassified_A4b_12_ASV2433	Unclassified_A4b_12_ASV2433	Presence	Absence
201	Unclassified_Anaerolineaceae_7_ASV2620	Unclassified_Anaerolineaceae_7_ASV2620	Presence	Absence
202	Unclassified_SBR1031_40_ASV4660	Unclassified_SBR1031_40_ASV4660	Presence	Absence
203	Unclassified_SBR1031_71_ASV4694	Unclassified_SBR1031_71_ASV4694	Presence	Absence
204	Unclassified_SBR1031_18_ASV4635	Unclassified_SBR1031_18_ASV4635	Presence	Absence
205	Flexilinea_ASV955	Flexilinea_ASV955	Presence	Absence
206	Flexilinea_ASV954	Flexilinea_ASV954	Presence	Absence
207	Flexilinea_ASV960	Flexilinea_ASV960	Presence	Absence
208	Flexilinea_ASV956	Flexilinea_ASV956	Presence	Absence
209	Flexilinea_ASV959	Flexilinea_ASV959	Presence	Absence
210	Flexilinea_ASV958	Flexilinea_ASV958	Presence	Absence
211	Flexilinea_ASV957	Flexilinea_ASV957	Presence	Absence
212	Thermoflexus_ASV2350	Thermoflexus_ASV2350	Presence	Absence
213	Unclassified_Anaerolineaceae_29_ASV2606	Unclassified_Anaerolineaceae_29_ASV2606	Presence	Absence
214	Unclassified_Anaerolineaceae_2_ASV2596	Unclassified_Anaerolineaceae_2_ASV2596	Presence	Absence
215	Unclassified_Anaerolineaceae_34_ASV2612	Unclassified_Anaerolineaceae_34_ASV2612	Presence	Absence
216	Unclassified_Anaerolineaceae_6_ASV2619	Unclassified_Anaerolineaceae_6_ASV2619	Presence	Absence
217	Unclassified_Anaerolineaceae_35_ASV2613	Unclassified_Anaerolineaceae_35_ASV2613	Presence	Absence
218	Unclassified_AKIW659_ASV105	Unclassified_AKIW659_ASV105	Presence	Absence
219	Unclassified_Acidimicrobiia_2_ASV2480	Unclassified_Acidimicrobiia_2_ASV2480	Presence	Absence
220	Unclassified_Microtrichales_1_ASV3877	Unclassified_Microtrichales_1_ASV3877	Presence	Absence
221	Unclassified_IMCC26256_1_ASV3640	Unclassified_IMCC26256_1_ASV3640	Presence	Absence
222	Unclassified_Microtrichales_5_ASV3881	Unclassified_Microtrichales_5_ASV3881	Presence	Absence
223	Unclassified_Microtrichaceae_2_ASV3875	Unclassified_Microtrichaceae_2_ASV3875	Presence	Absence
224	Sva0996_marine_group_ASV2300	Sva0996_marine_group_ASV2300	Presence	Absence
225	Unclassified_Actinomarinales_12_ASV2501	Unclassified_Actinomarinales_12_ASV2501	Presence	Absence
226	Unclassified_Actinomarinales_2_ASV2505	Unclassified_Actinomarinales_2_ASV2505	Presence	Absence
227	Unclassified_Actinomarinales_4_ASV2507	Unclassified_Actinomarinales_4_ASV2507	Presence	Absence
228	Nocardia_ASV1496	Nocardia_ASV1496	Presence	Absence
229	Streptomyces_ASV2259	Streptomyces_ASV2259	Presence	Absence
230	Unclassified_Actinobacteria_1_ASV2493	Unclassified_Actinobacteria_1_ASV2493	Presence	Absence
231	Unclassified_PeM15_6_ASV4089	Unclassified_PeM15_6_ASV4089	Presence	Absence
232	Unclassified_Frankiales_1_ASV3456	Unclassified_Frankiales_1_ASV3456	Presence	Absence
233	Unclassified_Frankiales_3_ASV3458	Unclassified_Frankiales_3_ASV3458	Presence	Absence
234	Unclassified_Pseudonocardiaceae_7_ASV4264	Unclassified_Pseudonocardiaceae_7_ASV4264	Presence	Absence
235	Unclassified_Pseudonocardiaceae_5_ASV4262	Unclassified_Pseudonocardiaceae_5_ASV4262	Presence	Absence
236	Actinophytocola_ASV86	Actinophytocola_ASV86	Presence	Absence
237	Pseudonocardia_ASV1778	Pseudonocardia_ASV1778	Presence	Absence
238	Pseudonocardia_ASV1777	Pseudonocardia_ASV1777	Presence	Absence
239	Actinokineospora_ASV73	Actinokineospora_ASV73	Presence	Absence
240	Actinophytocola_ASV87	Actinophytocola_ASV87	Presence	Absence
241	Corynebacterium_ASV666	Corynebacterium_ASV666	Presence	Absence
242	Corynebacterium_ASV647	Corynebacterium_ASV647	Presence	Absence
243	Unclassified_Corynebacteriaceae_2_ASV3140	Unclassified_Corynebacteriaceae_2_ASV3140	Presence	Absence
244	Lawsonella_ASV1192	Lawsonella_ASV1192	Presence	Absence
245	Modestobacter_ASV1403	Modestobacter_ASV1403	Presence	Absence
246	Geodermatophilus_ASV1009	Geodermatophilus_ASV1009	Presence	Absence
247	Unclassified_Geodermatophilaceae_1_ASV3582	Unclassified_Geodermatophilaceae_1_ASV3582	Presence	Absence
248	Crossiella_ASV685	Crossiella_ASV685	Presence	Absence
249	Unclassified_Microbacteriaceae_10_ASV3844	Unclassified_Microbacteriaceae_10_ASV3844	Presence	Absence
250	Demequina_ASV734	Demequina_ASV734	Presence	Absence
251	Demequina_ASV733	Demequina_ASV733	Presence	Absence
252	Amnibacterium_ASV172	Amnibacterium_ASV172	Presence	Absence
253	Unclassified_Microbacteriaceae_1_ASV3843	Unclassified_Microbacteriaceae_1_ASV3843	Presence	Absence
254	Unclassified_Micrococcales_4_ASV3864	Unclassified_Micrococcales_4_ASV3864	Presence	Absence
255	Curtobacterium_ASV690	Curtobacterium_ASV690	Presence	Absence
256	Unclassified_Microbacteriaceae_2_ASV3847	Unclassified_Microbacteriaceae_2_ASV3847	Presence	Absence
257	Unclassified_Actinomycetaceae_1_ASV2513	Unclassified_Actinomycetaceae_1_ASV2513	Presence	Absence
258	Bifidobacterium_ASV318	Bifidobacterium_ASV318	Presence	Absence
259	Bifidobacterium_ASV316	Bifidobacterium_ASV316	Presence	Absence
260	Unclassified_Micrococcaceae_5_ASV3859	Unclassified_Micrococcaceae_5_ASV3859	Presence	Absence
261	Kocuria_ASV1139	Kocuria_ASV1139	Presence	Absence
262	Brevibacterium_ASV356	Brevibacterium_ASV356	Presence	Absence
263	Unclassified_Glycomycetaceae_1_ASV3591	Unclassified_Glycomycetaceae_1_ASV3591	Presence	Absence
264	Actinomyces_ASV77	Actinomyces_ASV77	Presence	Absence
265	Actinomyces_ASV78	Actinomyces_ASV78	Presence	Absence
266	Actinomyces_ASV84	Actinomyces_ASV84	Presence	Absence
267	Actinomyces_ASV83	Actinomyces_ASV83	Presence	Absence
268	Actinomadura_ASV75	Actinomadura_ASV75	Presence	Absence
269	Unclassified_MB-A2-108_1_ASV3820	Unclassified_MB-A2-108_1_ASV3820	Presence	Absence
270	Unclassified_Eggerthellaceae_2_ASV3315	Unclassified_Eggerthellaceae_2_ASV3315	Presence	Absence
271	Unclassified_Eggerthellaceae_4_ASV3317	Unclassified_Eggerthellaceae_4_ASV3317	Presence	Absence
272	Unclassified_Eggerthellaceae_5_ASV3318	Unclassified_Eggerthellaceae_5_ASV3318	Presence	Absence
273	Unclassified_Eggerthellaceae_3_ASV3316	Unclassified_Eggerthellaceae_3_ASV3316	Presence	Absence
274	DNF00809_ASV844	DNF00809_ASV844	Presence	Absence
275	Unclassified_Coriobacteriia_1_ASV3138	Unclassified_Coriobacteriia_1_ASV3138	Presence	Absence
276	Unclassidied_67-14_2_ASV2412	Unclassidied_67-14_2_ASV2412	Presence	Absence
277	Unclassified_Solirubrobacteraceae_1_ASV4740	Unclassified_Solirubrobacteraceae_1_ASV4740	Presence	Absence
278	Rubrobacter_ASV1948	Rubrobacter_ASV1948	Presence	Absence
279	Unclassified_Gaiellales_1_ASV3461	Unclassified_Gaiellales_1_ASV3461	Presence	Absence
280	Unclassified_BD2-11_terrestrial_group_4_ASV2865	Unclassified_BD2-11_terrestrial_group_4_ASV2865	Presence	Absence
281	Unclassified_BD2-11_terrestrial_group_23_ASV2854	Unclassified_BD2-11_terrestrial_group_23_ASV2854	Presence	Absence
282	Unclassified_BD2-11_terrestrial_group_7_ASV2868	Unclassified_BD2-11_terrestrial_group_7_ASV2868	Presence	Absence
283	Unclassified_BD2-11_terrestrial_group_30_ASV2862	Unclassified_BD2-11_terrestrial_group_30_ASV2862	Presence	Absence
284	Unclassified_PAUC43f_marine_benthic_group_4_ASV4065	Unclassified_PAUC43f_marine_benthic_group_4_ASV4065	Presence	Absence
285	Unclassified_Gemmatimonadaceae_9_ASV3581	Unclassified_Gemmatimonadaceae_9_ASV3581	Presence	Absence
286	Unclassified_Gemmatimonadaceae_1_ASV3571	Unclassified_Gemmatimonadaceae_1_ASV3571	Presence	Absence
287	Unclassified_Gemmatimonadaceae_2_ASV3574	Unclassified_Gemmatimonadaceae_2_ASV3574	Presence	Absence
288	Calorithrix_ASV395	Calorithrix_ASV395	Presence	Absence
289	Unclassified_Calditrichaceae_3_ASV2970	Unclassified_Calditrichaceae_3_ASV2970	Presence	Absence
290	Unclassified_bacteriap25_5_ASV2705	Unclassified_bacteriap25_5_ASV2705	Presence	Absence
291	Desulfocapsa_ASV775	Desulfocapsa_ASV775	Presence	Absence
292	Desulfatiglans_ASV749	Desulfatiglans_ASV749	Presence	Absence
293	Unclassified_Syntrophobacterales_1_ASV4842	Unclassified_Syntrophobacterales_1_ASV4842	Presence	Absence
294	Unclassified_Syntrophobacteraceae_2_ASV4839	Unclassified_Syntrophobacteraceae_2_ASV4839	Presence	Absence
295	Syntrophobacter_ASV2315	Syntrophobacter_ASV2315	Presence	Absence
296	Unclassified_MBNT15_1_ASV3822	Unclassified_MBNT15_1_ASV3822	Presence	Absence
297	Unclassified_MBNT15_4_ASV3825	Unclassified_MBNT15_4_ASV3825	Presence	Absence
298	Unclassified_NB1-j_15_ASV3929	Unclassified_NB1-j_15_ASV3929	Presence	Absence
299	Unclassified_NB1-j_8_ASV3943	Unclassified_NB1-j_8_ASV3943	Presence	Absence
300	Desulfomonile_ASV786	Desulfomonile_ASV786	Presence	Absence
301	Desulfomonile_ASV788	Desulfomonile_ASV788	Presence	Absence
302	Unclassified_Alphaproteobacteria_5_ASV2573	Unclassified_Alphaproteobacteria_5_ASV2573	Presence	Absence
303	Reyranella_ASV1811	Reyranella_ASV1811	Presence	Absence
304	SWB02_ASV2302	SWB02_ASV2302	Presence	Absence
305	Unclassified_Hyphomonadaceae_8_ASV3636	Unclassified_Hyphomonadaceae_8_ASV3636	Presence	Absence
306	Candidatus_Megaira_ASV443	Candidatus_Megaira_ASV443	Presence	Absence
307	Amphiplicatus_ASV174	Amphiplicatus_ASV174	Presence	Absence
308	Unclassified_Rickettsiales_1_ASV4482	Unclassified_Rickettsiales_1_ASV4482	Presence	Absence
309	Unclassified_Sphingomonadaceae_3_ASV4754	Unclassified_Sphingomonadaceae_3_ASV4754	Presence	Absence
310	Limibaculum_ASV1266	Limibaculum_ASV1266	Presence	Absence
311	Unclassified_Rhodobacteraceae_93_ASV4440	Unclassified_Rhodobacteraceae_93_ASV4440	Presence	Absence
312	Candidatus_Alysiosphaera_ASV408	Candidatus_Alysiosphaera_ASV408	Presence	Absence
313	Unclassified_Alphaproteobacteria_23_ASV2556	Unclassified_Alphaproteobacteria_23_ASV2556	Presence	Absence
314	Unclassified_Alphaproteobacteria_24_ASV2557	Unclassified_Alphaproteobacteria_24_ASV2557	Presence	Absence
315	Unclassified_Rhodospirillales_1_ASV4455	Unclassified_Rhodospirillales_1_ASV4455	Presence	Absence
316	Peredibacter_ASV1629	Peredibacter_ASV1629	Presence	Absence
317	Unclassified_SM2D12_2_ASV4736	Unclassified_SM2D12_2_ASV4736	Presence	Absence
318	Unclassified_SM2D12_1_ASV4735	Unclassified_SM2D12_1_ASV4735	Presence	Absence
319	Allorhizobium-Neorhizobium-Pararhizobium-Rhizobium_ASV146	Allorhizobium-Neorhizobium-Pararhizobium-Rhizobium_ASV146	Presence	Absence
320	Ochrobactrum_ASV1539	Ochrobactrum_ASV1539	Presence	Absence
321	Allorhizobium-Neorhizobium-Pararhizobium-Rhizobium_ASV160	Allorhizobium-Neorhizobium-Pararhizobium-Rhizobium_ASV160	Presence	Absence
322	Allorhizobium-Neorhizobium-Pararhizobium-Rhizobium_ASV158	Allorhizobium-Neorhizobium-Pararhizobium-Rhizobium_ASV158	Presence	Absence
323	Aureimonas_ASV237	Aureimonas_ASV237	Presence	Absence
324	Aureimonas_ASV244	Aureimonas_ASV244	Presence	Absence
325	Allorhizobium-Neorhizobium-Pararhizobium-Rhizobium_ASV150	Allorhizobium-Neorhizobium-Pararhizobium-Rhizobium_ASV150	Presence	Absence
326	Aureimonas_ASV241	Aureimonas_ASV241	Presence	Absence
327	Allorhizobium-Neorhizobium-Pararhizobium-Rhizobium_ASV152	Allorhizobium-Neorhizobium-Pararhizobium-Rhizobium_ASV152	Presence	Absence
328	Bartonella_ASV283	Bartonella_ASV283	Presence	Absence
329	Unclassified_Rhizobiaceae_17_ASV4301	Unclassified_Rhizobiaceae_17_ASV4301	Presence	Absence
330	Unclassified_Rhizobiaceae_27_ASV4312	Unclassified_Rhizobiaceae_27_ASV4312	Presence	Absence
331	Unclassified_Rhizobiales_8_ASV4330	Unclassified_Rhizobiales_8_ASV4330	Presence	Absence
332	Hyphomonas_ASV1119	Hyphomonas_ASV1119	Presence	Absence
333	Unclassified_Rhizobiaceae_2_ASV4304	Unclassified_Rhizobiaceae_2_ASV4304	Presence	Absence
334	Unclassified_Rhizobiales_6_ASV4328	Unclassified_Rhizobiales_6_ASV4328	Presence	Absence
335	Phenylobacterium_ASV1655	Phenylobacterium_ASV1655	Presence	Absence
336	Methylobacterium-Methylorubrum_ASV1372	Methylobacterium-Methylorubrum_ASV1372	Presence	Absence
337	Methylobacterium-Methylorubrum_ASV1359	Methylobacterium-Methylorubrum_ASV1359	Presence	Absence
338	Bosea_ASV347	Bosea_ASV347	Presence	Absence
339	Salinarimonas_ASV1968	Salinarimonas_ASV1968	Presence	Absence
340	Unclassified_Beijerinckiaceae_22_ASV2891	Unclassified_Beijerinckiaceae_22_ASV2891	Presence	Absence
341	Unclassified_Beijerinckiaceae_2_ASV2888	Unclassified_Beijerinckiaceae_2_ASV2888	Presence	Absence
342	Methylobacterium-Methylorubrum_ASV1356	Methylobacterium-Methylorubrum_ASV1356	Presence	Absence
343	Unclassified_Beijerinckiaceae_11_ASV2879	Unclassified_Beijerinckiaceae_11_ASV2879	Presence	Absence
344	Microvirga_ASV1398	Microvirga_ASV1398	Presence	Absence
345	Microvirga_ASV1397	Microvirga_ASV1397	Presence	Absence
346	Unclassified_Beijerinckiaceae_15_ASV2883	Unclassified_Beijerinckiaceae_15_ASV2883	Presence	Absence
347	Unclassified_Beijerinckiaceae_5_ASV2898	Unclassified_Beijerinckiaceae_5_ASV2898	Presence	Absence
348	Unclassified_Beijerinckiaceae_3_ASV2896	Unclassified_Beijerinckiaceae_3_ASV2896	Presence	Absence
349	Unclassified_Alphaproteobacteria_13_ASV2545	Unclassified_Alphaproteobacteria_13_ASV2545	Presence	Absence
350	Phreatobacter_ASV1670	Phreatobacter_ASV1670	Presence	Absence
351	Phreatobacter_ASV1671	Phreatobacter_ASV1671	Presence	Absence
352	Xanthobacter_ASV5107	Xanthobacter_ASV5107	Presence	Absence
353	Unclassified_Xanthobacteraceae_3_ASV4955	Unclassified_Xanthobacteraceae_3_ASV4955	Presence	Absence
354	Unclassified_Rhizobiales_5_ASV4327	Unclassified_Rhizobiales_5_ASV4327	Presence	Absence
355	Unclassified_Pleomorphomonadaceae_1_ASV4224	Unclassified_Pleomorphomonadaceae_1_ASV4224	Presence	Absence
356	Unclassified_Xanthobacteraceae_2_ASV4954	Unclassified_Xanthobacteraceae_2_ASV4954	Presence	Absence
357	Rhodopseudomonas_ASV1867	Rhodopseudomonas_ASV1867	Presence	Absence
358	Rhodopseudomonas_ASV1864	Rhodopseudomonas_ASV1864	Presence	Absence
359	Rhodopseudomonas_ASV1868	Rhodopseudomonas_ASV1868	Presence	Absence
360	Unclassified_Xanthobacteraceae_5_ASV4957	Unclassified_Xanthobacteraceae_5_ASV4957	Presence	Absence
361	Unclassified_Xanthobacteraceae_11_ASV4952	Unclassified_Xanthobacteraceae_11_ASV4952	Presence	Absence
362	Pseudolabrys_ASV1751	Pseudolabrys_ASV1751	Presence	Absence
363	Unclassified_Xanthobacteraceae_6_ASV4958	Unclassified_Xanthobacteraceae_6_ASV4958	Presence	Absence
364	Rhodoplanes_ASV1863	Rhodoplanes_ASV1863	Presence	Absence
365	Unclassified_Xanthobacteraceae_7_ASV4959	Unclassified_Xanthobacteraceae_7_ASV4959	Presence	Absence
366	Unclassified_D05-2_1_ASV3215	Unclassified_D05-2_1_ASV3215	Presence	Absence
367	Unclassified_Pleomorphomonadaceae_3_ASV4226	Unclassified_Pleomorphomonadaceae_3_ASV4226	Presence	Absence
368	Unclassified_Pleomorphomonadaceae_2_ASV4225	Unclassified_Pleomorphomonadaceae_2_ASV4225	Presence	Absence
369	Unclassified_Pleomorphomonadaceae_4_ASV4227	Unclassified_Pleomorphomonadaceae_4_ASV4227	Presence	Absence
370	1174-901-12_ASV20	1174-901-12_ASV20	Presence	Absence
371	Rhodomicrobium_ASV1851	Rhodomicrobium_ASV1851	Presence	Absence
372	Blastochloris_ASV328	Blastochloris_ASV328	Presence	Absence
373	Blastochloris_ASV329	Blastochloris_ASV329	Presence	Absence
374	Devosia_ASV824	Devosia_ASV824	Presence	Absence
375	Devosia_ASV834	Devosia_ASV834	Presence	Absence
376	Devosia_ASV838	Devosia_ASV838	Presence	Absence
377	Devosia_ASV830	Devosia_ASV830	Presence	Absence
378	Unclassified_Rhizobiales_Incertae_Sedis_1_ASV4332	Unclassified_Rhizobiales_Incertae_Sedis_1_ASV4332	Presence	Absence
379	Unclassified_Devosiaceae_1_ASV3300	Unclassified_Devosiaceae_1_ASV3300	Presence	Absence
380	Unclassified_Rhizobiales_Incertae_Sedis_7_ASV4338	Unclassified_Rhizobiales_Incertae_Sedis_7_ASV4338	Presence	Absence
381	Unclassified_Rhizobiales_Incertae_Sedis_4_ASV4335	Unclassified_Rhizobiales_Incertae_Sedis_4_ASV4335	Presence	Absence
382	Mesorhizobium_ASV1355	Mesorhizobium_ASV1355	Presence	Absence
383	Unclassified_Rhizobiaceae_24_ASV4309	Unclassified_Rhizobiaceae_24_ASV4309	Presence	Absence
384	Unclassified_Rhizobiales_Incertae_Sedis_8_ASV4339	Unclassified_Rhizobiales_Incertae_Sedis_8_ASV4339	Presence	Absence
385	Unclassified_Rhizobiales_Incertae_Sedis_5_ASV4336	Unclassified_Rhizobiales_Incertae_Sedis_5_ASV4336	Presence	Absence
386	Unclassified_Rhizobiales_Incertae_Sedis_3_ASV4334	Unclassified_Rhizobiales_Incertae_Sedis_3_ASV4334	Presence	Absence
387	Unclassified_Rhizobiales_Incertae_Sedis_6_ASV4337	Unclassified_Rhizobiales_Incertae_Sedis_6_ASV4337	Presence	Absence
388	Hyphomicrobium_ASV1116	Hyphomicrobium_ASV1116	Presence	Absence
389	Hyphomicrobium_ASV1114	Hyphomicrobium_ASV1114	Presence	Absence
390	Kaistia_ASV1134	Kaistia_ASV1134	Presence	Absence
391	Unclassified_Beijerinckiaceae_26_ASV2895	Unclassified_Beijerinckiaceae_26_ASV2895	Presence	Absence
392	alphaI_cluster_ASV162	alphaI_cluster_ASV162	Presence	Absence
393	Unclassified_Beijerinckiaceae_18_ASV2886	Unclassified_Beijerinckiaceae_18_ASV2886	Presence	Absence
394	Unclassified_Beijerinckiaceae_4_ASV2897	Unclassified_Beijerinckiaceae_4_ASV2897	Presence	Absence
395	Unclassified_Beijerinckiaceae_8_ASV2901	Unclassified_Beijerinckiaceae_8_ASV2901	Presence	Absence
396	Unclassified_Rhizobiales_4_ASV4326	Unclassified_Rhizobiales_4_ASV4326	Presence	Absence
397	Unclassified_Beijerinckiaceae_12_ASV2880	Unclassified_Beijerinckiaceae_12_ASV2880	Presence	Absence
398	Unclassified_Beijerinckiaceae_6_ASV2899	Unclassified_Beijerinckiaceae_6_ASV2899	Presence	Absence
399	Hyphomicrobium_ASV1113	Hyphomicrobium_ASV1113	Presence	Absence
400	Hyphomicrobium_ASV1111	Hyphomicrobium_ASV1111	Presence	Absence
401	Unclassified_Rhizobiales_2_ASV4324	Unclassified_Rhizobiales_2_ASV4324	Presence	Absence
402	Chthonobacter_ASV556	Chthonobacter_ASV556	Presence	Absence
403	Pleomorphomonas_ASV1702	Pleomorphomonas_ASV1702	Presence	Absence
404	Pleomorphomonas_ASV1701	Pleomorphomonas_ASV1701	Presence	Absence
405	HIMB11_ASV1090	HIMB11_ASV1090	Presence	Absence
406	HIMB11_ASV1091	HIMB11_ASV1091	Presence	Absence
407	Roseovarius_ASV1919	Roseovarius_ASV1919	Presence	Absence
408	Unclassified_Rhodobacteraceae_39_ASV4380	Unclassified_Rhodobacteraceae_39_ASV4380	Presence	Absence
409	Rubellimicrobium_ASV1930	Rubellimicrobium_ASV1930	Presence	Absence
410	Rubellimicrobium_ASV1928	Rubellimicrobium_ASV1928	Presence	Absence
411	Unclassified_Rhodobacteraceae_2_ASV4359	Unclassified_Rhodobacteraceae_2_ASV4359	Presence	Absence
412	Paracoccus_ASV1592	Paracoccus_ASV1592	Presence	Absence
413	Unclassified_Rhodobacteraceae_61_ASV4405	Unclassified_Rhodobacteraceae_61_ASV4405	Presence	Absence
414	Unclassified_Rhodobacteraceae_13_ASV4352	Unclassified_Rhodobacteraceae_13_ASV4352	Presence	Absence
415	Unclassified_Rhodobacteraceae_78_ASV4423	Unclassified_Rhodobacteraceae_78_ASV4423	Presence	Absence
416	Unclassified_Rhodobacteraceae_56_ASV4399	Unclassified_Rhodobacteraceae_56_ASV4399	Presence	Absence
417	Unclassified_Rhodobacteraceae_10_ASV4346	Unclassified_Rhodobacteraceae_10_ASV4346	Presence	Absence
418	Unclassified_Rhodobacteraceae_90_ASV4437	Unclassified_Rhodobacteraceae_90_ASV4437	Presence	Absence
419	Unclassified_Rhodobacteraceae_31_ASV4372	Unclassified_Rhodobacteraceae_31_ASV4372	Presence	Absence
420	Unclassified_Rhizobiaceae_9_ASV4321	Unclassified_Rhizobiaceae_9_ASV4321	Presence	Absence
421	Aminobacter_ASV171	Aminobacter_ASV171	Presence	Absence
422	Mesorhizobium_ASV1354	Mesorhizobium_ASV1354	Presence	Absence
423	Unclassified_Rhizobiaceae_26_ASV4311	Unclassified_Rhizobiaceae_26_ASV4311	Presence	Absence
424	Mesorhizobium_ASV1353	Mesorhizobium_ASV1353	Presence	Absence
425	Unclassified_Stappiaceae_2_ASV4798	Unclassified_Stappiaceae_2_ASV4798	Presence	Absence
426	Unclassified_Sphingomonadaceae_6_ASV4757	Unclassified_Sphingomonadaceae_6_ASV4757	Presence	Absence
427	Unclassified_Kiloniellaceae_9_ASV3681	Unclassified_Kiloniellaceae_9_ASV3681	Presence	Absence
428	Unclassified_Alphaproteobacteria_31_ASV2565	Unclassified_Alphaproteobacteria_31_ASV2565	Presence	Absence
429	Unclassified_Terasakiellaceae_4_ASV4847	Unclassified_Terasakiellaceae_4_ASV4847	Presence	Absence
430	Unclassified_Alphaproteobacteria_37_ASV2571	Unclassified_Alphaproteobacteria_37_ASV2571	Presence	Absence
431	Roseomonas_ASV1911	Roseomonas_ASV1911	Presence	Absence
432	Roseomonas_ASV1908	Roseomonas_ASV1908	Presence	Absence
433	Roseomonas_ASV1910	Roseomonas_ASV1910	Presence	Absence
434	Unclassified_Acetobacteraceae_2_ASV2467	Unclassified_Acetobacteraceae_2_ASV2467	Presence	Absence
435	Unclassified_Acetobacteraceae_5_ASV2470	Unclassified_Acetobacteraceae_5_ASV2470	Presence	Absence
436	Roseomonas_ASV1907	Roseomonas_ASV1907	Presence	Absence
437	Unclassified_Acetobacteraceae_3_ASV2468	Unclassified_Acetobacteraceae_3_ASV2468	Presence	Absence
438	Unclassified_Acetobacteraceae_1_ASV2466	Unclassified_Acetobacteraceae_1_ASV2466	Presence	Absence
439	Asaia_ASV223	Asaia_ASV223	Presence	Absence
440	Asaia_ASV226	Asaia_ASV226	Presence	Absence
441	Gluconobacter_ASV1023	Gluconobacter_ASV1023	Presence	Absence
442	Gluconobacter_ASV1024	Gluconobacter_ASV1024	Presence	Absence
443	Commensalibacter_ASV640	Commensalibacter_ASV640	Presence	Absence
444	Commensalibacter_ASV641	Commensalibacter_ASV641	Presence	Absence
445	Asaia_ASV222	Asaia_ASV222	Presence	Absence
446	Rubritepida_ASV1943	Rubritepida_ASV1943	Presence	Absence
447	Unclassified_Acetobacteraceae_6_ASV2471	Unclassified_Acetobacteraceae_6_ASV2471	Presence	Absence
448	Skermanella_ASV2092	Skermanella_ASV2092	Presence	Absence
449	Unclassified_Alphaproteobacteria_22_ASV2555	Unclassified_Alphaproteobacteria_22_ASV2555	Presence	Absence
450	Rhodovibrio_ASV1874	Rhodovibrio_ASV1874	Presence	Absence
451	Unclassified_Rhodospirillales_3_ASV4457	Unclassified_Rhodospirillales_3_ASV4457	Presence	Absence
452	Novosphingobium_ASV1512	Novosphingobium_ASV1512	Presence	Absence
453	Unclassified_Sphingomonadaceae_13_ASV4751	Unclassified_Sphingomonadaceae_13_ASV4751	Presence	Absence
454	Novosphingobium_ASV1513	Novosphingobium_ASV1513	Presence	Absence
455	Novosphingobium_ASV1514	Novosphingobium_ASV1514	Presence	Absence
456	Unclassified_Rhodospirillales_2_ASV4456	Unclassified_Rhodospirillales_2_ASV4456	Presence	Absence
457	Haliangium_ASV1053	Haliangium_ASV1053	Presence	Absence
458	Bdellovibrio_ASV299	Bdellovibrio_ASV299	Presence	Absence
459	Bdellovibrio_ASV295	Bdellovibrio_ASV295	Presence	Absence
460	Bdellovibrio_ASV304	Bdellovibrio_ASV304	Presence	Absence
461	Bdellovibrio_ASV307	Bdellovibrio_ASV307	Presence	Absence
462	Bdellovibrio_ASV305	Bdellovibrio_ASV305	Presence	Absence
463	Bdellovibrio_ASV306	Bdellovibrio_ASV306	Presence	Absence
464	Unclassified_Desulfobacterales_3_ASV3235	Unclassified_Desulfobacterales_3_ASV3235	Presence	Absence
465	Unclassified_Bradymonadales_9_ASV2954	Unclassified_Bradymonadales_9_ASV2954	Presence	Absence
466	Desulfovibrio_ASV820	Desulfovibrio_ASV820	Presence	Absence
467	Desulfovibrio_ASV803	Desulfovibrio_ASV803	Presence	Absence
468	Desulfovibrio_ASV805	Desulfovibrio_ASV805	Presence	Absence
469	Desulfovibrio_ASV806	Desulfovibrio_ASV806	Presence	Absence
470	Desulfovibrio_ASV821	Desulfovibrio_ASV821	Presence	Absence
471	Desulfocurvus_ASV783	Desulfocurvus_ASV783	Presence	Absence
472	Unclassified_Oligoflexaceae_4_ASV3996	Unclassified_Oligoflexaceae_4_ASV3996	Presence	Absence
473	Unclassified_Oligoflexaceae_3_ASV3995	Unclassified_Oligoflexaceae_3_ASV3995	Presence	Absence
474	Unclassified_Oligoflexaceae_2_ASV3994	Unclassified_Oligoflexaceae_2_ASV3994	Presence	Absence
475	Abditibacterium_ASV26	Abditibacterium_ASV26	Presence	Absence
476	Unclassified_Fimbriimonadaceae_2_ASV3385	Unclassified_Fimbriimonadaceae_2_ASV3385	Presence	Absence
477	Unclassified_vadinHA49_4_ASV4881	Unclassified_vadinHA49_4_ASV4881	Presence	Absence
478	Unclassified_Burkholderiales_3_ASV2960	Unclassified_Burkholderiales_3_ASV2960	Presence	Absence
479	Unclassified_Burkholderiales_2_ASV2959	Unclassified_Burkholderiales_2_ASV2959	Presence	Absence
480	Unclassified_Rhodocyclaceae_6_ASV4452	Unclassified_Rhodocyclaceae_6_ASV4452	Presence	Absence
481	Unclassified_Comamonadaceae_28_ASV3125	Unclassified_Comamonadaceae_28_ASV3125	Presence	Absence
482	Unclassified_Comamonadaceae_3_ASV3127	Unclassified_Comamonadaceae_3_ASV3127	Presence	Absence
483	Unclassified_Comamonadaceae_7_ASV3134	Unclassified_Comamonadaceae_7_ASV3134	Presence	Absence
484	Simplicispira_ASV2089	Simplicispira_ASV2089	Presence	Absence
485	Delftia_ASV732	Delftia_ASV732	Presence	Absence
486	Unclassified_Comamonadaceae_18_ASV3114	Unclassified_Comamonadaceae_18_ASV3114	Presence	Absence
487	Unclassified_Comamonadaceae_30_ASV3128	Unclassified_Comamonadaceae_30_ASV3128	Presence	Absence
488	Neisseria_ASV1470	Neisseria_ASV1470	Presence	Absence
489	Neisseria_ASV1469	Neisseria_ASV1469	Presence	Absence
490	Snodgrassella_ASV2104	Snodgrassella_ASV2104	Presence	Absence
491	Unclassified_Hydrogenophilaceae_1_ASV3621	Unclassified_Hydrogenophilaceae_1_ASV3621	Presence	Absence
492	Salinisphaera_ASV1993	Salinisphaera_ASV1993	Presence	Absence
493	Unclassified_Desulfosarcinaceae_7_ASV3275	Unclassified_Desulfosarcinaceae_7_ASV3275	Presence	Absence
494	Unclassified_Desulfosarcinaceae_2_ASV3270	Unclassified_Desulfosarcinaceae_2_ASV3270	Presence	Absence
495	Unclassified_Desulfosarcinaceae_6_ASV3274	Unclassified_Desulfosarcinaceae_6_ASV3274	Presence	Absence
496	Sva0081_sediment_group_ASV2290	Sva0081_sediment_group_ASV2290	Presence	Absence
497	SEEP-SRB1_ASV2069	SEEP-SRB1_ASV2069	Presence	Absence
498	Sva0081_sediment_group_ASV2289	Sva0081_sediment_group_ASV2289	Presence	Absence
499	Sva0081_sediment_group_ASV2298	Sva0081_sediment_group_ASV2298	Presence	Absence
500	SEEP-SRB1_ASV2068	SEEP-SRB1_ASV2068	Presence	Absence
501	Unknown_Family_Gammaproteobacteria_Incertae_Sedis_9_ASV5019	Unknown_Family_Gammaproteobacteria_Incertae_Sedis_9_ASV5019	Presence	Absence
502	Silanimonas_ASV2088	Silanimonas_ASV2088	Presence	Absence
503	Unclassified_Xanthomonadaceae_4_ASV4965	Unclassified_Xanthomonadaceae_4_ASV4965	Presence	Absence
504	Unclassified_Chromatiaceae_14_ASV3057	Unclassified_Chromatiaceae_14_ASV3057	Presence	Absence
505	Unclassified_Gammaproteobacteria_34_ASV3489	Unclassified_Gammaproteobacteria_34_ASV3489	Presence	Absence
506	Methylocaldum_ASV1373	Methylocaldum_ASV1373	Presence	Absence
507	Unclassified_Methylococcaceae_1_ASV3832	Unclassified_Methylococcaceae_1_ASV3832	Presence	Absence
508	Methyloparacoccus_ASV1384	Methyloparacoccus_ASV1384	Presence	Absence
509	Methyloparacoccus_ASV1386	Methyloparacoccus_ASV1386	Presence	Absence
510	Unclassified_Halieaceae_4_ASV3601	Unclassified_Halieaceae_4_ASV3601	Presence	Absence
511	Unclassified_Gammaproteobacteria_58_ASV3515	Unclassified_Gammaproteobacteria_58_ASV3515	Presence	Absence
512	Halochromatium_ASV1059	Halochromatium_ASV1059	Presence	Absence
513	Halochromatium_ASV1057	Halochromatium_ASV1057	Presence	Absence
514	Unclassified_Gammaproteobacteria_9_ASV3535	Unclassified_Gammaproteobacteria_9_ASV3535	Presence	Absence
515	Unclassified_Chromatiaceae_2_ASV3062	Unclassified_Chromatiaceae_2_ASV3062	Presence	Absence
516	Unclassified_Chromatiaceae_6_ASV3066	Unclassified_Chromatiaceae_6_ASV3066	Presence	Absence
517	Unclassified_Chromatiaceae_11_ASV3054	Unclassified_Chromatiaceae_11_ASV3054	Presence	Absence
518	Unclassified_Chromatiaceae_13_ASV3056	Unclassified_Chromatiaceae_13_ASV3056	Presence	Absence
519	Unclassified_Chromatiaceae_9_ASV3069	Unclassified_Chromatiaceae_9_ASV3069	Presence	Absence
520	Thiocapsa_ASV2354	Thiocapsa_ASV2354	Presence	Absence
521	Thiocapsa_ASV2355	Thiocapsa_ASV2355	Presence	Absence
522	Unclassified_Chromatiaceae_7_ASV3067	Unclassified_Chromatiaceae_7_ASV3067	Presence	Absence
523	Unclassified_Chromatiaceae_5_ASV3065	Unclassified_Chromatiaceae_5_ASV3065	Presence	Absence
524	Thiohalocapsa_ASV2358	Thiohalocapsa_ASV2358	Presence	Absence
525	Unclassified_Chromatiaceae_15_ASV3058	Unclassified_Chromatiaceae_15_ASV3058	Presence	Absence
526	Pseudomonas_ASV1767	Pseudomonas_ASV1767	Presence	Absence
527	Pseudomonas_ASV1766	Pseudomonas_ASV1766	Presence	Absence
528	Pseudomonas_ASV1768	Pseudomonas_ASV1768	Presence	Absence
529	Unclassified_Pseudomonadales_8_ASV4257	Unclassified_Pseudomonadales_8_ASV4257	Presence	Absence
530	Steroidobacter_ASV2234	Steroidobacter_ASV2234	Presence	Absence
531	Acidibacter_ASV46	Acidibacter_ASV46	Presence	Absence
532	BD1-7_clade_ASV292	BD1-7_clade_ASV292	Presence	Absence
533	Acinetobacter_ASV64	Acinetobacter_ASV64	Presence	Absence
534	Unclassified_Enterobacteriaceae_5_ASV3342	Unclassified_Enterobacteriaceae_5_ASV3342	Presence	Absence
535	Pantoea_ASV1586	Pantoea_ASV1586	Presence	Absence
536	Unclassified_Orbaceae_1_ASV4016	Unclassified_Orbaceae_1_ASV4016	Presence	Absence
537	Unclassified_Pasteurellaceae_7_ASV4052	Unclassified_Pasteurellaceae_7_ASV4052	Presence	Absence
538	Unclassified_Gammaproteobacteria_35_ASV3490	Unclassified_Gammaproteobacteria_35_ASV3490	Presence	Absence
539	Actinobacillus_ASV72	Actinobacillus_ASV72	Presence	Absence
540	Haemophilus_ASV1043	Haemophilus_ASV1043	Presence	Absence
541	Providencia_ASV1736	Providencia_ASV1736	Presence	Absence
542	Pseudoalteromonas_ASV1741	Pseudoalteromonas_ASV1741	Presence	Absence
543	Vibrio_ASV5054	Vibrio_ASV5054	Presence	Absence
544	Vibrio_ASV5050	Vibrio_ASV5050	Presence	Absence
545	Unclassified_Yersiniaceae_3_ASV4971	Unclassified_Yersiniaceae_3_ASV4971	Presence	Absence
546	Hafnia-Obesumbacterium_ASV1044	Hafnia-Obesumbacterium_ASV1044	Presence	Absence
547	Escherichia-Shigella_ASV896	Escherichia-Shigella_ASV896	Presence	Absence
548	Unclassified_Erwiniaceae_2_ASV3357	Unclassified_Erwiniaceae_2_ASV3357	Presence	Absence
549	Unclassified_Erwiniaceae_6_ASV3361	Unclassified_Erwiniaceae_6_ASV3361	Presence	Absence
550	Unclassified_Enterobacteriaceae_13_ASV3330	Unclassified_Enterobacteriaceae_13_ASV3330	Presence	Absence
551	Unclassified_Enterobacteriaceae_9_ASV3346	Unclassified_Enterobacteriaceae_9_ASV3346	Presence	Absence
552	Unclassified_Enterobacteriaceae_17_ASV3334	Unclassified_Enterobacteriaceae_17_ASV3334	Presence	Absence
553	Unclassified_Enterobacterales_3_ASV3322	Unclassified_Enterobacterales_3_ASV3322	Presence	Absence
554	Unclassified_Erwiniaceae_4_ASV3359	Unclassified_Erwiniaceae_4_ASV3359	Presence	Absence
555	Unclassified_Enterobacteriaceae_15_ASV3332	Unclassified_Enterobacteriaceae_15_ASV3332	Presence	Absence
556	Unclassified_Erwiniaceae_8_ASV3363	Unclassified_Erwiniaceae_8_ASV3363	Presence	Absence
557	Unclassified_Erwiniaceae_5_ASV3360	Unclassified_Erwiniaceae_5_ASV3360	Presence	Absence
558	Acinetobacter_ASV68	Acinetobacter_ASV68	Presence	Absence
559	Acinetobacter_ASV52	Acinetobacter_ASV52	Presence	Absence
560	Acinetobacter_ASV54	Acinetobacter_ASV54	Presence	Absence
561	Unclassified_Moraxellaceae_1_ASV3900	Unclassified_Moraxellaceae_1_ASV3900	Presence	Absence
562	[Agitococcus]_lubricus_group_ASV2	[Agitococcus]_lubricus_group_ASV2	Presence	Absence
563	Rheinheimera_ASV1816	Rheinheimera_ASV1816	Presence	Absence
564	Unclassified_Pseudomonadales_5_ASV4254	Unclassified_Pseudomonadales_5_ASV4254	Presence	Absence
565	Unclassified_Halomonadaceae_4_ASV3608	Unclassified_Halomonadaceae_4_ASV3608	Presence	Absence
566	Cobetia_ASV631	Cobetia_ASV631	Presence	Absence
567	Halomonas_ASV1066	Halomonas_ASV1066	Presence	Absence
568	Unclassified_EPR3968-O8a-Bc78_4_ASV3350	Unclassified_EPR3968-O8a-Bc78_4_ASV3350	Presence	Absence
569	Unclassified_EPR3968-O8a-Bc78_2_ASV3348	Unclassified_EPR3968-O8a-Bc78_2_ASV3348	Presence	Absence
570	Unclassified_Nitrosococcaceae_4_ASV3968	Unclassified_Nitrosococcaceae_4_ASV3968	Presence	Absence
571	Unclassified_Gammaproteobacteria_63_ASV3521	Unclassified_Gammaproteobacteria_63_ASV3521	Presence	Absence
572	Unclassified_Gammaproteobacteria_50_ASV3507	Unclassified_Gammaproteobacteria_50_ASV3507	Presence	Absence
573	Unclassified_Gammaproteobacteria_12_ASV3465	Unclassified_Gammaproteobacteria_12_ASV3465	Presence	Absence
574	Unknown_Family_Gammaproteobacteria_Incertae_Sedis_15_ASV5009	Unknown_Family_Gammaproteobacteria_Incertae_Sedis_15_ASV5009	Presence	Absence
575	Unclassified_Diplorickettsiaceae_2_ASV3305	Unclassified_Diplorickettsiaceae_2_ASV3305	Presence	Absence
576	Unclassified_Diplorickettsiaceae_4_ASV3307	Unclassified_Diplorickettsiaceae_4_ASV3307	Presence	Absence
577	Unclassified_Gammaproteobacteria_38_ASV3493	Unclassified_Gammaproteobacteria_38_ASV3493	Presence	Absence
578	Candidatus_Berkiella_ASV415	Candidatus_Berkiella_ASV415	Presence	Absence
579	Legionella_ASV1212	Legionella_ASV1212	Presence	Absence
580	Legionella_ASV1213	Legionella_ASV1213	Presence	Absence
581	Legionella_ASV1218	Legionella_ASV1218	Presence	Absence
582	Legionella_ASV1221	Legionella_ASV1221	Presence	Absence
583	Legionella_ASV1226	Legionella_ASV1226	Presence	Absence
584	Legionella_ASV1223	Legionella_ASV1223	Presence	Absence
585	Legionella_ASV1224	Legionella_ASV1224	Presence	Absence
586	Legionella_ASV1215	Legionella_ASV1215	Presence	Absence
587	Legionella_ASV1219	Legionella_ASV1219	Presence	Absence
588	Unclassified_Leptospiraceae_1_ASV3783	Unclassified_Leptospiraceae_1_ASV3783	Presence	Absence
589	Unclassified_Arcobacteraceae_1_ASV2628	Unclassified_Arcobacteraceae_1_ASV2628	Presence	Absence
590	Sulfurovum_ASV2275	Sulfurovum_ASV2275	Presence	Absence
591	Sulfurospirillum_ASV2274	Sulfurospirillum_ASV2274	Presence	Absence
592	Unclassified_Babeliales_1_ASV2667	Unclassified_Babeliales_1_ASV2667	Presence	Absence
593	Unclassified_UBA12409_2_ASV4866	Unclassified_UBA12409_2_ASV4866	Presence	Absence
594	Unclassified_Vermiphilaceae_2_ASV4888	Unclassified_Vermiphilaceae_2_ASV4888	Presence	Absence
595	Unclassified_Vermiphilaceae_6_ASV4892	Unclassified_Vermiphilaceae_6_ASV4892	Presence	Absence
596	Unclassified_Vermiphilaceae_5_ASV4891	Unclassified_Vermiphilaceae_5_ASV4891	Presence	Absence
597	Unclassified_Babeliales_8_ASV2675	Unclassified_Babeliales_8_ASV2675	Presence	Absence
598	Unclassified_Vermiphilaceae_4_ASV4890	Unclassified_Vermiphilaceae_4_ASV4890	Presence	Absence
599	Unclassified_Babeliales_6_ASV2673	Unclassified_Babeliales_6_ASV2673	Presence	Absence
600	Unclassified_Babeliales_9_ASV2676	Unclassified_Babeliales_9_ASV2676	Presence	Absence
601	Unclassified_Babeliales_4_ASV2671	Unclassified_Babeliales_4_ASV2671	Presence	Absence
602	Candidatus_Saccharimonas_ASV466	Candidatus_Saccharimonas_ASV466	Presence	Absence
603	Candidatus_Saccharimonas_ASV467	Candidatus_Saccharimonas_ASV467	Presence	Absence
604	Unclassified_Parcubacteria_8_ASV4041	Unclassified_Parcubacteria_8_ASV4041	Presence	Absence
605	Turicibacter_ASV2393	Turicibacter_ASV2393	Presence	Absence
606	Mycoplasma_ASV1445	Mycoplasma_ASV1445	Presence	Absence
607	Mycoplasma_ASV1455	Mycoplasma_ASV1455	Presence	Absence
608	Mycoplasma_ASV1449	Mycoplasma_ASV1449	Presence	Absence
609	Gemella_ASV995	Gemella_ASV995	Presence	Absence
610	Brevinema_ASV364	Brevinema_ASV364	Presence	Absence
611	Vagococcus_ASV5036	Vagococcus_ASV5036	Presence	Absence
612	Abiotrophia_ASV32	Abiotrophia_ASV32	Presence	Absence
613	Enterococcus_ASV865	Enterococcus_ASV865	Presence	Absence
614	Enterococcus_ASV868	Enterococcus_ASV868	Presence	Absence
615	Enterococcus_ASV873	Enterococcus_ASV873	Presence	Absence
616	Staphylococcus_ASV2220	Staphylococcus_ASV2220	Presence	Absence
617	Lysinibacillus_ASV1293	Lysinibacillus_ASV1293	Presence	Absence
618	Bacillus_ASV264	Bacillus_ASV264	Presence	Absence
619	Exiguobacterium_ASV910	Exiguobacterium_ASV910	Presence	Absence
620	Gemella_ASV990	Gemella_ASV990	Presence	Absence
621	Gemella_ASV986	Gemella_ASV986	Presence	Absence
622	Unclassified_Bacillaceae_4_ASV2688	Unclassified_Bacillaceae_4_ASV2688	Presence	Absence
623	Virgibacillus_ASV5070	Virgibacillus_ASV5070	Presence	Absence
624	Bacillus_ASV257	Bacillus_ASV257	Presence	Absence
625	Lysinibacillus_ASV1294	Lysinibacillus_ASV1294	Presence	Absence
626	Unclassified_Planococcaceae_2_ASV4222	Unclassified_Planococcaceae_2_ASV4222	Presence	Absence
627	Lysinibacillus_ASV1295	Lysinibacillus_ASV1295	Presence	Absence
628	Fructobacillus_ASV967	Fructobacillus_ASV967	Presence	Absence
629	Weissella_ASV5079	Weissella_ASV5079	Presence	Absence
630	Leuconostoc_ASV1253	Leuconostoc_ASV1253	Presence	Absence
631	Leuconostoc_ASV1257	Leuconostoc_ASV1257	Presence	Absence
632	Lacticaseibacillus_ASV1172	Lacticaseibacillus_ASV1172	Presence	Absence
633	Lactobacillus_ASV1177	Lactobacillus_ASV1177	Presence	Absence
634	Lactobacillus_ASV1180	Lactobacillus_ASV1180	Presence	Absence
635	Apilactobacillus_ASV197	Apilactobacillus_ASV197	Presence	Absence
636	Unclassified_Gastranaerophilales_11_ASV3539	Unclassified_Gastranaerophilales_11_ASV3539	Presence	Absence
637	Unclassified_Gastranaerophilales_5_ASV3544	Unclassified_Gastranaerophilales_5_ASV3544	Presence	Absence
638	Phormidium_MBIC10003_ASV1663	Phormidium_MBIC10003_ASV1663	Presence	Absence
639	Phormidium_MBIC10003_ASV1661	Phormidium_MBIC10003_ASV1661	Presence	Absence
640	Unclassified_Xenococcaceae_2_ASV4968	Unclassified_Xenococcaceae_2_ASV4968	Presence	Absence
641	Gloeocapsa_ASV1021	Gloeocapsa_ASV1021	Presence	Absence
642	Coleofasciculus_PCC-7420_ASV634	Coleofasciculus_PCC-7420_ASV634	Presence	Absence
643	Chalicogloea_CCALA_975_ASV507	Chalicogloea_CCALA_975_ASV507	Presence	Absence
644	Synechocystis_PCC-6803_ASV2313	Synechocystis_PCC-6803_ASV2313	Presence	Absence
645	Leptolyngbya_ANT.L52.2_ASV1236	Leptolyngbya_ANT.L52.2_ASV1236	Presence	Absence
646	Unclassified_Leptolyngbyaceae_2_ASV3775	Unclassified_Leptolyngbyaceae_2_ASV3775	Presence	Absence
647	Leptolyngbya_PCC-6306_ASV1237	Leptolyngbya_PCC-6306_ASV1237	Presence	Absence
648	Scytonema_VB-61278_ASV2050	Scytonema_VB-61278_ASV2050	Presence	Absence
649	Unclassified_Cyanobacteriales_8_ASV3166	Unclassified_Cyanobacteriales_8_ASV3166	Presence	Absence
650	Unclassified_Nostocaceae_2_ASV3984	Unclassified_Nostocaceae_2_ASV3984	Presence	Absence
651	Unclassified_Cyanobacteriia_2_ASV3169	Unclassified_Cyanobacteriia_2_ASV3169	Presence	Absence
652	Limnothrix_ASV1270	Limnothrix_ASV1270	Presence	Absence
653	Cyanobium_PCC-6307_ASV705	Cyanobium_PCC-6307_ASV705	Presence	Absence
654	Unclassified_Gastranaerophilales_2_ASV3541	Unclassified_Gastranaerophilales_2_ASV3541	Presence	Absence
655	Unclassified_Gastranaerophilales_4_ASV3543	Unclassified_Gastranaerophilales_4_ASV3543	Presence	Absence
656	Unclassified_Gastranaerophilales_3_ASV3542	Unclassified_Gastranaerophilales_3_ASV3542	Presence	Absence
657	Unclassified_Gastranaerophilales_12_ASV3540	Unclassified_Gastranaerophilales_12_ASV3540	Presence	Absence
658	Unclassified_Gastranaerophilales_8_ASV3547	Unclassified_Gastranaerophilales_8_ASV3547	Presence	Absence
659	Unclassified_Gastranaerophilales_7_ASV3546	Unclassified_Gastranaerophilales_7_ASV3546	Presence	Absence
660	Unclassified_Obscuribacteraceae_3_ASV3991	Unclassified_Obscuribacteraceae_3_ASV3991	Presence	Absence
661	Unclassified_Clostridia_3_ASV3081	Unclassified_Clostridia_3_ASV3081	Presence	Absence
662	Unclassified_Sporomusaceae_1_ASV4785	Unclassified_Sporomusaceae_1_ASV4785	Presence	Absence
663	Veillonella_ASV5040	Veillonella_ASV5040	Presence	Absence
664	Unclassified_Erysipelotrichaceae_5_ASV3369	Unclassified_Erysipelotrichaceae_5_ASV3369	Presence	Absence
665	Unclassified_Erysipelotrichaceae_7_ASV3371	Unclassified_Erysipelotrichaceae_7_ASV3371	Presence	Absence
666	Unclassified_Erysipelotrichaceae_4_ASV3368	Unclassified_Erysipelotrichaceae_4_ASV3368	Presence	Absence
667	Unclassified_Erysipelotrichaceae_6_ASV3370	Unclassified_Erysipelotrichaceae_6_ASV3370	Presence	Absence
668	Erysipelotrichaceae_UCG-009_ASV889	Erysipelotrichaceae_UCG-009_ASV889	Presence	Absence
669	Erysipelotrichaceae_UCG-009_ASV888	Erysipelotrichaceae_UCG-009_ASV888	Presence	Absence
670	Erysipelotrichaceae_UCG-009_ASV887	Erysipelotrichaceae_UCG-009_ASV887	Presence	Absence
671	Solobacterium_ASV2110	Solobacterium_ASV2110	Presence	Absence
672	Unclassified_Erysipelotrichaceae_1_ASV3365	Unclassified_Erysipelotrichaceae_1_ASV3365	Presence	Absence
673	Solobacterium_ASV2107	Solobacterium_ASV2107	Presence	Absence
674	Solobacterium_ASV2108	Solobacterium_ASV2108	Presence	Absence
675	Streptococcus_ASV2251	Streptococcus_ASV2251	Presence	Absence
676	Streptococcus_ASV2248	Streptococcus_ASV2248	Presence	Absence
677	Streptococcus_ASV2246	Streptococcus_ASV2246	Presence	Absence
678	Streptococcus_ASV2240	Streptococcus_ASV2240	Presence	Absence
679	Streptococcus_ASV2241	Streptococcus_ASV2241	Presence	Absence
680	Mycoplasma_ASV1450	Mycoplasma_ASV1450	Presence	Absence
681	Ureaplasma_ASV5034	Ureaplasma_ASV5034	Presence	Absence
682	Ureaplasma_ASV5030	Ureaplasma_ASV5030	Presence	Absence
683	Unclassified_Enterobacteriaceae_6_ASV3343	Unclassified_Enterobacteriaceae_6_ASV3343	Presence	Absence
684	Unclassified_RF39_12_ASV4273	Unclassified_RF39_12_ASV4273	Presence	Absence
685	Unclassified_RF39_18_ASV4279	Unclassified_RF39_18_ASV4279	Presence	Absence
686	Unclassified_RF39_9_ASV4292	Unclassified_RF39_9_ASV4292	Presence	Absence
687	Unclassified_RF39_7_ASV4290	Unclassified_RF39_7_ASV4290	Presence	Absence
688	Unclassified_RF39_3_ASV4286	Unclassified_RF39_3_ASV4286	Presence	Absence
689	Unclassified_RF39_8_ASV4291	Unclassified_RF39_8_ASV4291	Presence	Absence
690	Unclassified_RF39_16_ASV4277	Unclassified_RF39_16_ASV4277	Presence	Absence
691	Unclassified_RF39_10_ASV4271	Unclassified_RF39_10_ASV4271	Presence	Absence
692	Unclassified_RF39_20_ASV4282	Unclassified_RF39_20_ASV4282	Presence	Absence
693	Unclassified_RF39_23_ASV4285	Unclassified_RF39_23_ASV4285	Presence	Absence
694	Unclassified_RF39_5_ASV4288	Unclassified_RF39_5_ASV4288	Presence	Absence
695	Unclassified_RF39_21_ASV4283	Unclassified_RF39_21_ASV4283	Presence	Absence
696	Unclassified_RF39_1_ASV4270	Unclassified_RF39_1_ASV4270	Presence	Absence
697	Unclassified_RF39_6_ASV4289	Unclassified_RF39_6_ASV4289	Presence	Absence
698	Unclassified_RF39_17_ASV4278	Unclassified_RF39_17_ASV4278	Presence	Absence
699	Unclassified_RF39_13_ASV4274	Unclassified_RF39_13_ASV4274	Presence	Absence
700	Unclassified_RF39_2_ASV4281	Unclassified_RF39_2_ASV4281	Presence	Absence
701	Unclassified_RF39_11_ASV4272	Unclassified_RF39_11_ASV4272	Presence	Absence
702	Unclassified_RF39_4_ASV4287	Unclassified_RF39_4_ASV4287	Presence	Absence
703	Anaerovorax_ASV194	Anaerovorax_ASV194	Presence	Absence
704	[Eubacterium]_nodatum_group_ASV7	[Eubacterium]_nodatum_group_ASV7	Presence	Absence
705	[Eubacterium]_nodatum_group_ASV6	[Eubacterium]_nodatum_group_ASV6	Presence	Absence
706	Family_XIII_AD3011_group_ASV915	Family_XIII_AD3011_group_ASV915	Presence	Absence
707	Family_XIII_AD3011_group_ASV916	Family_XIII_AD3011_group_ASV916	Presence	Absence
708	Mogibacterium_ASV1404	Mogibacterium_ASV1404	Presence	Absence
709	Mogibacterium_ASV1405	Mogibacterium_ASV1405	Presence	Absence
710	Anaerococcus_ASV187	Anaerococcus_ASV187	Presence	Absence
711	Anaerococcus_ASV188	Anaerococcus_ASV188	Presence	Absence
712	ZOR0006_ASV5117	ZOR0006_ASV5117	Presence	Absence
713	TC1_ASV2327	TC1_ASV2327	Presence	Absence
714	Fretibacterium_ASV962	Fretibacterium_ASV962	Presence	Absence
715	Anaerofustis_ASV189	Anaerofustis_ASV189	Presence	Absence
716	Acetobacterium_ASV38	Acetobacterium_ASV38	Presence	Absence
717	Unclassified_Peptococcaceae_4_ASV4096	Unclassified_Peptococcaceae_4_ASV4096	Presence	Absence
718	Unclassified_Christensenellaceae_2_ASV3047	Unclassified_Christensenellaceae_2_ASV3047	Presence	Absence
719	Unclassified_Christensenellaceae_6_ASV3051	Unclassified_Christensenellaceae_6_ASV3051	Presence	Absence
720	Romboutsia_ASV1893	Romboutsia_ASV1893	Presence	Absence
721	[Eubacterium]_hallii_group_ASV4	[Eubacterium]_hallii_group_ASV4	Presence	Absence
722	[Eubacterium]_hallii_group_ASV5	[Eubacterium]_hallii_group_ASV5	Presence	Absence
723	Unclassified_Clostridia_UCG-014_4_ASV3092	Unclassified_Clostridia_UCG-014_4_ASV3092	Presence	Absence
724	Unclassified_Clostridia_UCG-014_2_ASV3090	Unclassified_Clostridia_UCG-014_2_ASV3090	Presence	Absence
725	Unclassified_Clostridia_UCG-014_3_ASV3091	Unclassified_Clostridia_UCG-014_3_ASV3091	Presence	Absence
726	Unclassified_Clostridia_UCG-014_13_ASV3089	Unclassified_Clostridia_UCG-014_13_ASV3089	Presence	Absence
727	Unclassified_Clostridia_UCG-014_9_ASV3097	Unclassified_Clostridia_UCG-014_9_ASV3097	Presence	Absence
728	Unclassified_Clostridia_UCG-014_1_ASV3085	Unclassified_Clostridia_UCG-014_1_ASV3085	Presence	Absence
729	Unclassified_Clostridia_UCG-014_12_ASV3088	Unclassified_Clostridia_UCG-014_12_ASV3088	Presence	Absence
730	Unclassified_Clostridia_UCG-014_10_ASV3086	Unclassified_Clostridia_UCG-014_10_ASV3086	Presence	Absence
731	Unclassified_Clostridia_UCG-014_6_ASV3094	Unclassified_Clostridia_UCG-014_6_ASV3094	Presence	Absence
732	Unclassified_Clostridia_UCG-014_11_ASV3087	Unclassified_Clostridia_UCG-014_11_ASV3087	Presence	Absence
733	Unclassified_Clostridia_UCG-014_5_ASV3093	Unclassified_Clostridia_UCG-014_5_ASV3093	Presence	Absence
734	Unclassified_Lachnospirales_1_ASV3713	Unclassified_Lachnospirales_1_ASV3713	Presence	Absence
735	[Eubacterium]_ruminantium_group_ASV9	[Eubacterium]_ruminantium_group_ASV9	Presence	Absence
736	Unclassified_Lachnospiraceae_18_ASV3691	Unclassified_Lachnospiraceae_18_ASV3691	Presence	Absence
737	Butyrivibrio_ASV383	Butyrivibrio_ASV383	Presence	Absence
738	Syntrophococcus_ASV2316	Syntrophococcus_ASV2316	Presence	Absence
739	Unclassified_Lachnospiraceae_20_ASV3694	Unclassified_Lachnospiraceae_20_ASV3694	Presence	Absence
740	Unclassified_Lachnospiraceae_8_ASV3711	Unclassified_Lachnospiraceae_8_ASV3711	Presence	Absence
741	Lachnospiraceae_UCG-002_ASV1168	Lachnospiraceae_UCG-002_ASV1168	Presence	Absence
742	Unclassified_Lachnospiraceae_21_ASV3695	Unclassified_Lachnospiraceae_21_ASV3695	Presence	Absence
743	Unclassified_Lachnospiraceae_26_ASV3700	Unclassified_Lachnospiraceae_26_ASV3700	Presence	Absence
744	Unclassified_Lachnospiraceae_24_ASV3698	Unclassified_Lachnospiraceae_24_ASV3698	Presence	Absence
745	[Eubacterium]_ventriosum_group_ASV11	[Eubacterium]_ventriosum_group_ASV11	Presence	Absence
746	Roseburia_ASV1900	Roseburia_ASV1900	Presence	Absence
747	Unclassified_Lachnospiraceae_2_ASV3693	Unclassified_Lachnospiraceae_2_ASV3693	Presence	Absence
748	Lachnospiraceae_XPB1014_group_ASV1170	Lachnospiraceae_XPB1014_group_ASV1170	Presence	Absence
749	Unclassified_Lachnospiraceae_6_ASV3709	Unclassified_Lachnospiraceae_6_ASV3709	Presence	Absence
750	Marvinbryantia_ASV1329	Marvinbryantia_ASV1329	Presence	Absence
751	Lachnospiraceae_UCG-002_ASV1167	Lachnospiraceae_UCG-002_ASV1167	Presence	Absence
752	Lachnospiraceae_NK3A20_group_ASV1162	Lachnospiraceae_NK3A20_group_ASV1162	Presence	Absence
753	Lachnospiraceae_NK3A20_group_ASV1163	Lachnospiraceae_NK3A20_group_ASV1163	Presence	Absence
754	Acetitomaculum_ASV35	Acetitomaculum_ASV35	Presence	Absence
755	Acetitomaculum_ASV36	Acetitomaculum_ASV36	Presence	Absence
756	Acetitomaculum_ASV37	Acetitomaculum_ASV37	Presence	Absence
757	[Ruminococcus]_gauvreauii_group_ASV12	[Ruminococcus]_gauvreauii_group_ASV12	Presence	Absence
758	Unclassified_Lachnospiraceae_19_ASV3692	Unclassified_Lachnospiraceae_19_ASV3692	Presence	Absence
759	NK4A214_group_ASV1489	NK4A214_group_ASV1489	Presence	Absence
760	UCG-002_ASV2403	UCG-002_ASV2403	Presence	Absence
761	NK4A214_group_ASV1493	NK4A214_group_ASV1493	Presence	Absence
762	UCG-005_ASV2404	UCG-005_ASV2404	Presence	Absence
763	Monoglobus_ASV1408	Monoglobus_ASV1408	Presence	Absence
764	NK4A214_group_ASV1491	NK4A214_group_ASV1491	Presence	Absence
765	NK4A214_group_ASV1490	NK4A214_group_ASV1490	Presence	Absence
766	NK4A214_group_ASV1492	NK4A214_group_ASV1492	Presence	Absence
767	NK4A214_group_ASV1494	NK4A214_group_ASV1494	Presence	Absence
768	Unclassified_Ruminococcaceae_18_ASV4498	Unclassified_Ruminococcaceae_18_ASV4498	Presence	Absence
769	Ruminococcus_ASV1952	Ruminococcus_ASV1952	Presence	Absence
770	Unclassified_Ruminococcaceae_2_ASV4499	Unclassified_Ruminococcaceae_2_ASV4499	Presence	Absence
771	Unclassified_Ruminococcaceae_9_ASV4506	Unclassified_Ruminococcaceae_9_ASV4506	Presence	Absence
772	Unclassified_Ruminococcaceae_3_ASV4500	Unclassified_Ruminococcaceae_3_ASV4500	Presence	Absence
773	Unclassified_Ruminococcaceae_10_ASV4490	Unclassified_Ruminococcaceae_10_ASV4490	Presence	Absence
774	Ruminococcus_ASV1953	Ruminococcus_ASV1953	Presence	Absence
775	Unclassified_Ruminococcaceae_6_ASV4503	Unclassified_Ruminococcaceae_6_ASV4503	Presence	Absence
776	Unclassified_Ruminococcaceae_12_ASV4492	Unclassified_Ruminococcaceae_12_ASV4492	Presence	Absence
777	Unclassified_Ruminococcaceae_13_ASV4493	Unclassified_Ruminococcaceae_13_ASV4493	Presence	Absence
778	Unclassified_Ruminococcaceae_14_ASV4494	Unclassified_Ruminococcaceae_14_ASV4494	Presence	Absence
779	Unclassified_Ruminococcaceae_17_ASV4497	Unclassified_Ruminococcaceae_17_ASV4497	Presence	Absence
780	Unclassified_Ruminococcaceae_7_ASV4504	Unclassified_Ruminococcaceae_7_ASV4504	Presence	Absence
781	Unclassified_Ruminococcaceae_8_ASV4505	Unclassified_Ruminococcaceae_8_ASV4505	Presence	Absence
782	Unclassified_[Eubacterium]_coprostanoligenes_group_2_ASV2417	Unclassified_[Eubacterium]_coprostanoligenes_group_2_ASV2417	Presence	Absence
783	UCG-009_ASV2408	UCG-009_ASV2408	Presence	Absence
784	Saccharofermentans_ASV1957	Saccharofermentans_ASV1957	Presence	Absence
785	Christensenellaceae_R-7_group_ASV536	Christensenellaceae_R-7_group_ASV536	Presence	Absence
786	Christensenellaceae_R-7_group_ASV527	Christensenellaceae_R-7_group_ASV527	Presence	Absence
787	Christensenellaceae_R-7_group_ASV522	Christensenellaceae_R-7_group_ASV522	Presence	Absence
788	Unclassified_Clostridiaceae_1_ASV3098	Unclassified_Clostridiaceae_1_ASV3098	Presence	Absence
789	Clostridium_sensu_stricto_1_ASV580	Clostridium_sensu_stricto_1_ASV580	Presence	Absence
790	Clostridium_sensu_stricto_1_ASV598	Clostridium_sensu_stricto_1_ASV598	Presence	Absence
791	Clostridium_sensu_stricto_1_ASV597	Clostridium_sensu_stricto_1_ASV597	Presence	Absence
792	Clostridium_sensu_stricto_1_ASV602	Clostridium_sensu_stricto_1_ASV602	Presence	Absence
793	Clostridium_sensu_stricto_1_ASV606	Clostridium_sensu_stricto_1_ASV606	Presence	Absence
794	Clostridium_sensu_stricto_1_ASV573	Clostridium_sensu_stricto_1_ASV573	Presence	Absence
795	Clostridium_sensu_stricto_1_ASV577	Clostridium_sensu_stricto_1_ASV577	Presence	Absence
796	Clostridium_sensu_stricto_1_ASV622	Clostridium_sensu_stricto_1_ASV622	Presence	Absence
797	Christensenellaceae_R-7_group_ASV532	Christensenellaceae_R-7_group_ASV532	Presence	Absence
798	Christensenellaceae_R-7_group_ASV513	Christensenellaceae_R-7_group_ASV513	Presence	Absence
799	Christensenellaceae_R-7_group_ASV543	Christensenellaceae_R-7_group_ASV543	Presence	Absence
800	Christensenellaceae_R-7_group_ASV514	Christensenellaceae_R-7_group_ASV514	Presence	Absence
801	Christensenellaceae_R-7_group_ASV516	Christensenellaceae_R-7_group_ASV516	Presence	Absence
802	Christensenellaceae_R-7_group_ASV538	Christensenellaceae_R-7_group_ASV538	Presence	Absence
803	Christensenellaceae_R-7_group_ASV530	Christensenellaceae_R-7_group_ASV530	Presence	Absence
804	Christensenellaceae_R-7_group_ASV531	Christensenellaceae_R-7_group_ASV531	Presence	Absence
805	Christensenellaceae_R-7_group_ASV537	Christensenellaceae_R-7_group_ASV537	Presence	Absence
806	Christensenellaceae_R-7_group_ASV542	Christensenellaceae_R-7_group_ASV542	Presence	Absence
807	Christensenellaceae_R-7_group_ASV534	Christensenellaceae_R-7_group_ASV534	Presence	Absence
808	Christensenellaceae_R-7_group_ASV533	Christensenellaceae_R-7_group_ASV533	Presence	Absence
809	Christensenellaceae_R-7_group_ASV518	Christensenellaceae_R-7_group_ASV518	Presence	Absence
810	Christensenellaceae_R-7_group_ASV519	Christensenellaceae_R-7_group_ASV519	Presence	Absence
811	Christensenellaceae_R-7_group_ASV520	Christensenellaceae_R-7_group_ASV520	Presence	Absence
812	Christensenellaceae_R-7_group_ASV521	Christensenellaceae_R-7_group_ASV521	Presence	Absence
813	Christensenellaceae_R-7_group_ASV526	Christensenellaceae_R-7_group_ASV526	Presence	Absence
814	Christensenellaceae_R-7_group_ASV529	Christensenellaceae_R-7_group_ASV529	Presence	Absence
815	Christensenellaceae_R-7_group_ASV523	Christensenellaceae_R-7_group_ASV523	Presence	Absence
816	Christensenellaceae_R-7_group_ASV515	Christensenellaceae_R-7_group_ASV515	Presence	Absence
817	Christensenellaceae_R-7_group_ASV524	Christensenellaceae_R-7_group_ASV524	Presence	Absence
818	Unclassified_Acholeplasmataceae_1_ASV2477	Unclassified_Acholeplasmataceae_1_ASV2477	Presence	Absence
819	Cellulosilyticum_ASV502	Cellulosilyticum_ASV502	Presence	Absence
820	Cellulosilyticum_ASV501	Cellulosilyticum_ASV501	Presence	Absence
