# Supplementary material
Source: Research Square preprint supplement (doi:10.21203/rs.3.rs-9440532/v1)
Supplement: Supplementary file 4 [file 9f209678b5a33aa6825b9c7b.xlsx]

## Sheet: Structural_zero_male_tIgG_low
	Taxon	species	Low	High
1	Sumerlaea_ASV2278	Sumerlaea_ASV2278	Absence	Presence
2	Sumerlaea_ASV2280	Sumerlaea_ASV2280	Absence	Presence
3	Sumerlaea_ASV2282	Sumerlaea_ASV2282	Absence	Presence
4	Sumerlaea_ASV2279	Sumerlaea_ASV2279	Absence	Presence
5	Sumerlaea_ASV2276	Sumerlaea_ASV2276	Absence	Presence
6	Unclassified_Beijerinckiaceae_17_ASV2885	Unclassified_Beijerinckiaceae_17_ASV2885	Absence	Presence
7	Unclassified_MD2902-B12_ASV1341	Unclassified_MD2902-B12_ASV1341	Absence	Presence
8	Unclassified_LCP-89_3_ASV3747	Unclassified_LCP-89_3_ASV3747	Absence	Presence
9	Unclassified_LCP-89_1_ASV3745	Unclassified_LCP-89_1_ASV3745	Absence	Presence
10	Unclassified_LCP-89_6_ASV3750	Unclassified_LCP-89_6_ASV3750	Absence	Presence
11	Unclassified_Zixibacteria_23_ASV4988	Unclassified_Zixibacteria_23_ASV4988	Absence	Presence
12	Unclassified_CK-2C2-2_2_ASV3078	Unclassified_CK-2C2-2_2_ASV3078	Absence	Presence
13	Unclassified_Calditrichaceae_9_ASV2982	Unclassified_Calditrichaceae_9_ASV2982	Absence	Presence
14	Unclassified_Calditrichaceae_7_ASV2978	Unclassified_Calditrichaceae_7_ASV2978	Absence	Presence
15	Unclassified_Calditrichaceae_5_ASV2974	Unclassified_Calditrichaceae_5_ASV2974	Absence	Presence
16	Unclassified_Calditrichaceae_6_ASV2976	Unclassified_Calditrichaceae_6_ASV2976	Absence	Presence
17	Unclassified_Calditrichaceae_4_ASV2972	Unclassified_Calditrichaceae_4_ASV2972	Absence	Presence
18	Unclassified_Firmicutes_5_ASV3390	Unclassified_Firmicutes_5_ASV3390	Absence	Presence
19	Thermosinus_ASV2353	Thermosinus_ASV2353	Absence	Presence
20	Thermosinus_ASV2352	Thermosinus_ASV2352	Absence	Presence
21	Unclassified_Firmicutes_4_ASV3389	Unclassified_Firmicutes_4_ASV3389	Absence	Presence
22	Unclassified_Calditrichaceae_8_ASV2981	Unclassified_Calditrichaceae_8_ASV2981	Absence	Presence
23	Unclassified_Firmicutes_2_ASV3387	Unclassified_Firmicutes_2_ASV3387	Absence	Presence
24	Unclassified_Fibrobacterales_4_ASV3383	Unclassified_Fibrobacterales_4_ASV3383	Absence	Presence
25	Unclassified_MAT-CR-H6-H10_2_ASV3818	Unclassified_MAT-CR-H6-H10_2_ASV3818	Absence	Presence
26	Unclassified_09D2Z48_ASV14	Unclassified_09D2Z48_ASV14	Absence	Presence
27	Unclassified_Fibrobacterales_2_ASV3381	Unclassified_Fibrobacterales_2_ASV3381	Absence	Presence
28	Unclassified_Fibrobacterales_1_ASV3380	Unclassified_Fibrobacterales_1_ASV3380	Absence	Presence
29	Unclassified_MAT-CR-H6-H10_3_ASV3819	Unclassified_MAT-CR-H6-H10_3_ASV3819	Absence	Presence
30	Unclassified_MAT-CR-H6-H10_1_ASV3817	Unclassified_MAT-CR-H6-H10_1_ASV3817	Absence	Presence
31	SM23-31_ASV2100	SM23-31_ASV2100	Absence	Presence
32	Unclassified_LCP-89_2_ASV3746	Unclassified_LCP-89_2_ASV3746	Absence	Presence
33	Ignavibacterium_ASV1125	Ignavibacterium_ASV1125	Absence	Presence
34	Unclassified_Melioribacteraceae_1_ASV3826	Unclassified_Melioribacteraceae_1_ASV3826	Absence	Presence
35	IheB3-7_ASV1126	IheB3-7_ASV1126	Absence	Presence
36	Unclassified_Latescibacterota_8_ASV3743	Unclassified_Latescibacterota_8_ASV3743	Absence	Presence
37	Unclassified_Kapabacteriales_1_ASV3667	Unclassified_Kapabacteriales_1_ASV3667	Absence	Presence
38	Unclassified_Kapabacteriales_4_ASV3670	Unclassified_Kapabacteriales_4_ASV3670	Absence	Presence
39	Unclassified_Kapabacteriales_2_ASV3668	Unclassified_Kapabacteriales_2_ASV3668	Absence	Presence
40	Unclassified_Balneolaceae_82_ASV2837	Unclassified_Balneolaceae_82_ASV2837	Absence	Presence
41	Unclassified_Balneolaceae_53_ASV2805	Unclassified_Balneolaceae_53_ASV2805	Absence	Presence
42	Unclassified_Balneolaceae_43_ASV2794	Unclassified_Balneolaceae_43_ASV2794	Absence	Presence
43	Unclassified_Balneolaceae_75_ASV2829	Unclassified_Balneolaceae_75_ASV2829	Absence	Presence
44	Unclassified_Balneolaceae_64_ASV2817	Unclassified_Balneolaceae_64_ASV2817	Absence	Presence
45	Unclassified_Balneolaceae_7_ASV2823	Unclassified_Balneolaceae_7_ASV2823	Absence	Presence
46	Unclassified_Balneolaceae_42_ASV2793	Unclassified_Balneolaceae_42_ASV2793	Absence	Presence
47	Unclassified_Balneolaceae_11_ASV2759	Unclassified_Balneolaceae_11_ASV2759	Absence	Presence
48	Unclassified_Balneolaceae_80_ASV2835	Unclassified_Balneolaceae_80_ASV2835	Absence	Presence
49	Unclassified_Balneolaceae_15_ASV2763	Unclassified_Balneolaceae_15_ASV2763	Absence	Presence
50	Unclassified_Balneolaceae_26_ASV2775	Unclassified_Balneolaceae_26_ASV2775	Absence	Presence
51	Unclassified_Balneolaceae_33_ASV2783	Unclassified_Balneolaceae_33_ASV2783	Absence	Presence
52	Unclassified_Balneolaceae_51_ASV2803	Unclassified_Balneolaceae_51_ASV2803	Absence	Presence
53	Unclassified_Balneolaceae_66_ASV2819	Unclassified_Balneolaceae_66_ASV2819	Absence	Presence
54	Unclassified_Balneolaceae_21_ASV2770	Unclassified_Balneolaceae_21_ASV2770	Absence	Presence
55	Unclassified_Balneolaceae_56_ASV2808	Unclassified_Balneolaceae_56_ASV2808	Absence	Presence
56	Unclassified_Balneolaceae_39_ASV2789	Unclassified_Balneolaceae_39_ASV2789	Absence	Presence
57	Unclassified_Balneolaceae_17_ASV2765	Unclassified_Balneolaceae_17_ASV2765	Absence	Presence
58	Unclassified_Balneolaceae_44_ASV2795	Unclassified_Balneolaceae_44_ASV2795	Absence	Presence
59	Unclassified_Balneolaceae_63_ASV2816	Unclassified_Balneolaceae_63_ASV2816	Absence	Presence
60	Unclassified_Balneolaceae_22_ASV2771	Unclassified_Balneolaceae_22_ASV2771	Absence	Presence
61	Gracilimonas_ASV1030	Gracilimonas_ASV1030	Absence	Presence
62	Gracilimonas_ASV1026	Gracilimonas_ASV1026	Absence	Presence
63	Gracilimonas_ASV1029	Gracilimonas_ASV1029	Absence	Presence
64	Unclassified_Balneolaceae_78_ASV2832	Unclassified_Balneolaceae_78_ASV2832	Absence	Presence
65	Unclassified_Balneolaceae_29_ASV2778	Unclassified_Balneolaceae_29_ASV2778	Absence	Presence
66	Unclassified_Balneolaceae_36_ASV2786	Unclassified_Balneolaceae_36_ASV2786	Absence	Presence
67	Unclassified_Balneolaceae_71_ASV2825	Unclassified_Balneolaceae_71_ASV2825	Absence	Presence
68	Unclassified_Balneolaceae_19_ASV2767	Unclassified_Balneolaceae_19_ASV2767	Absence	Presence
69	Unclassified_Balneolaceae_5_ASV2801	Unclassified_Balneolaceae_5_ASV2801	Absence	Presence
70	Unclassified_Balneolaceae_38_ASV2788	Unclassified_Balneolaceae_38_ASV2788	Absence	Presence
71	Unclassified_Balneolaceae_73_ASV2827	Unclassified_Balneolaceae_73_ASV2827	Absence	Presence
72	Unclassified_Balneolaceae_67_ASV2820	Unclassified_Balneolaceae_67_ASV2820	Absence	Presence
73	Unclassified_Balneolaceae_10_ASV2758	Unclassified_Balneolaceae_10_ASV2758	Absence	Presence
74	Unclassified_Balneolaceae_1_ASV2757	Unclassified_Balneolaceae_1_ASV2757	Absence	Presence
75	MAT-CR-P4-C12_ASV1338	MAT-CR-P4-C12_ASV1338	Absence	Presence
76	MAT-CR-P4-C12_ASV1339	MAT-CR-P4-C12_ASV1339	Absence	Presence
77	Unclassified_Balneolaceae_48_ASV2799	Unclassified_Balneolaceae_48_ASV2799	Absence	Presence
78	Unclassified_Balneolaceae_40_ASV2791	Unclassified_Balneolaceae_40_ASV2791	Absence	Presence
79	Unclassified_Balneolaceae_70_ASV2824	Unclassified_Balneolaceae_70_ASV2824	Absence	Presence
80	Unclassified_Balneolaceae_59_ASV2811	Unclassified_Balneolaceae_59_ASV2811	Absence	Presence
81	Unclassified_Balneolaceae_32_ASV2782	Unclassified_Balneolaceae_32_ASV2782	Absence	Presence
82	Unclassified_Balneolaceae_65_ASV2818	Unclassified_Balneolaceae_65_ASV2818	Absence	Presence
83	Unclassified_Balneolaceae_81_ASV2836	Unclassified_Balneolaceae_81_ASV2836	Absence	Presence
84	Unclassified_Balneolaceae_37_ASV2787	Unclassified_Balneolaceae_37_ASV2787	Absence	Presence
85	Unclassified_vadinHA49_13_ASV4871	Unclassified_vadinHA49_13_ASV4871	Absence	Presence
86	Unclassified_vadinHA49_16_ASV4874	Unclassified_vadinHA49_16_ASV4874	Absence	Presence
87	Unclassified_vadinHA49_9_ASV4886	Unclassified_vadinHA49_9_ASV4886	Absence	Presence
88	Unclassified_vadinHA49_17_ASV4875	Unclassified_vadinHA49_17_ASV4875	Absence	Presence
89	Unclassified_vadinHA49_11_ASV4869	Unclassified_vadinHA49_11_ASV4869	Absence	Presence
90	Unclassified_vadinHA49_1_ASV4867	Unclassified_vadinHA49_1_ASV4867	Absence	Presence
91	Unclassified_vadinHA49_15_ASV4873	Unclassified_vadinHA49_15_ASV4873	Absence	Presence
92	Unclassified_SM1A07_1_ASV4729	Unclassified_SM1A07_1_ASV4729	Absence	Presence
93	Unclassified_SM1A07_4_ASV4732	Unclassified_SM1A07_4_ASV4732	Absence	Presence
94	Unclassified_SM1A07_2_ASV4730	Unclassified_SM1A07_2_ASV4730	Absence	Presence
95	Unclassified_SM1A07_3_ASV4731	Unclassified_SM1A07_3_ASV4731	Absence	Presence
96	Unclassified_Chitinophagales_7_ASV3040	Unclassified_Chitinophagales_7_ASV3040	Absence	Presence
97	Leadbetterella_ASV1205	Leadbetterella_ASV1205	Absence	Presence
98	Leadbetterella_ASV1204	Leadbetterella_ASV1204	Absence	Presence
99	Leadbetterella_ASV1206	Leadbetterella_ASV1206	Absence	Presence
100	Unclassified_Cryomorphaceae_2_ASV3146	Unclassified_Cryomorphaceae_2_ASV3146	Absence	Presence
101	Unclassified_Flavobacteriales_3_ASV3453	Unclassified_Flavobacteriales_3_ASV3453	Absence	Presence
102	Cryomorpha_ASV687	Cryomorpha_ASV687	Absence	Presence
103	Cryomorpha_ASV689	Cryomorpha_ASV689	Absence	Presence
104	Cryomorpha_ASV686	Cryomorpha_ASV686	Absence	Presence
105	Sphingobacterium_ASV2113	Sphingobacterium_ASV2113	Absence	Presence
106	Unclassified_Lentimicrobiaceae_6_ASV3763	Unclassified_Lentimicrobiaceae_6_ASV3763	Absence	Presence
107	Unclassified_Bacteroidales_12_ASV2712	Unclassified_Bacteroidales_12_ASV2712	Absence	Presence
108	Unclassified_SB-5_4_ASV4619	Unclassified_SB-5_4_ASV4619	Absence	Presence
109	Unclassified_Bacteroidales_11_ASV2711	Unclassified_Bacteroidales_11_ASV2711	Absence	Presence
110	Unclassified_Bacteroidales_5_ASV2719	Unclassified_Bacteroidales_5_ASV2719	Absence	Presence
111	Paludibacter_ASV1582	Paludibacter_ASV1582	Absence	Presence
112	Unclassified_Chitinophagales_4_ASV3037	Unclassified_Chitinophagales_4_ASV3037	Absence	Presence
113	Unclassified_Chitinophagales_10_ASV3034	Unclassified_Chitinophagales_10_ASV3034	Absence	Presence
114	Unclassified_E6aC02_ASV855	Unclassified_E6aC02_ASV855	Absence	Presence
115	Unclassified_NS9_marine_group_2_ASV3988	Unclassified_NS9_marine_group_2_ASV3988	Absence	Presence
116	Unclassified_Marinilabiliaceae_12_ASV3795	Unclassified_Marinilabiliaceae_12_ASV3795	Absence	Presence
117	Unclassified_Marinilabiliaceae_10_ASV3793	Unclassified_Marinilabiliaceae_10_ASV3793	Absence	Presence
118	Unclassified_Marinilabiliaceae_9_ASV3807	Unclassified_Marinilabiliaceae_9_ASV3807	Absence	Presence
119	Unclassified_Marinilabiliaceae_13_ASV3796	Unclassified_Marinilabiliaceae_13_ASV3796	Absence	Presence
120	Unclassified_Marinilabiliaceae_7_ASV3805	Unclassified_Marinilabiliaceae_7_ASV3805	Absence	Presence
121	Unclassified_Bacteroidetes_BD2-2_17_ASV2732	Unclassified_Bacteroidetes_BD2-2_17_ASV2732	Absence	Presence
122	Unclassified_AKYH767_3_ASV2535	Unclassified_AKYH767_3_ASV2535	Absence	Presence
123	Unclassified_ST-12K33_1_ASV4793	Unclassified_ST-12K33_1_ASV4793	Absence	Presence
124	Alistipes_ASV130	Alistipes_ASV130	Absence	Presence
125	Unclassified_Lentimicrobiaceae_7_ASV3764	Unclassified_Lentimicrobiaceae_7_ASV3764	Absence	Presence
126	Unclassified_Lentimicrobiaceae_16_ASV3758	Unclassified_Lentimicrobiaceae_16_ASV3758	Absence	Presence
127	Unclassified_Lentimicrobiaceae_8_ASV3765	Unclassified_Lentimicrobiaceae_8_ASV3765	Absence	Presence
128	Unclassified_Lentimicrobiaceae_4_ASV3761	Unclassified_Lentimicrobiaceae_4_ASV3761	Absence	Presence
129	Unclassified_Lentimicrobiaceae_15_ASV3757	Unclassified_Lentimicrobiaceae_15_ASV3757	Absence	Presence
130	Unclassified_Lentimicrobiaceae_9_ASV3766	Unclassified_Lentimicrobiaceae_9_ASV3766	Absence	Presence
131	Unclassified_Lentimicrobiaceae_2_ASV3759	Unclassified_Lentimicrobiaceae_2_ASV3759	Absence	Presence
132	Unclassified_Lentimicrobiaceae_1_ASV3751	Unclassified_Lentimicrobiaceae_1_ASV3751	Absence	Presence
133	Unclassified_Lentimicrobiaceae_12_ASV3754	Unclassified_Lentimicrobiaceae_12_ASV3754	Absence	Presence
134	Unclassified_Bacteroidales_9_ASV2723	Unclassified_Bacteroidales_9_ASV2723	Absence	Presence
135	Unclassified_AKYH767_2_ASV2534	Unclassified_AKYH767_2_ASV2534	Absence	Presence
136	Unclassified_Lentimicrobiaceae_13_ASV3755	Unclassified_Lentimicrobiaceae_13_ASV3755	Absence	Presence
137	Unclassified_Lentimicrobiaceae_10_ASV3752	Unclassified_Lentimicrobiaceae_10_ASV3752	Absence	Presence
138	Unclassified_Lentimicrobiaceae_11_ASV3753	Unclassified_Lentimicrobiaceae_11_ASV3753	Absence	Presence
139	Unclassified_Bacteroidia_2_ASV2752	Unclassified_Bacteroidia_2_ASV2752	Absence	Presence
140	Unclassified_Bacteroidetes_BD2-2_14_ASV2729	Unclassified_Bacteroidetes_BD2-2_14_ASV2729	Absence	Presence
141	Vicingus_ASV5066	Vicingus_ASV5066	Absence	Presence
142	Vicingus_ASV5065	Vicingus_ASV5065	Absence	Presence
143	Vicingus_ASV5067	Vicingus_ASV5067	Absence	Presence
144	Unclassified_Sphingobacteriaceae_1_ASV4742	Unclassified_Sphingobacteriaceae_1_ASV4742	Absence	Presence
145	Unclassified_Chitinophagales_5_ASV3038	Unclassified_Chitinophagales_5_ASV3038	Absence	Presence
146	Taibaiella_ASV2322	Taibaiella_ASV2322	Absence	Presence
147	Taibaiella_ASV2320	Taibaiella_ASV2320	Absence	Presence
148	Taibaiella_ASV2319	Taibaiella_ASV2319	Absence	Presence
149	Unclassified_Saprospiraceae_57_ASV4578	Unclassified_Saprospiraceae_57_ASV4578	Absence	Presence
150	Unclassified_Saprospiraceae_52_ASV4573	Unclassified_Saprospiraceae_52_ASV4573	Absence	Presence
151	Unclassified_Saprospiraceae_26_ASV4544	Unclassified_Saprospiraceae_26_ASV4544	Absence	Presence
152	Unclassified_Saprospiraceae_28_ASV4546	Unclassified_Saprospiraceae_28_ASV4546	Absence	Presence
153	Unclassified_Saprospiraceae_17_ASV4534	Unclassified_Saprospiraceae_17_ASV4534	Absence	Presence
154	Unclassified_Saprospiraceae_6_ASV4579	Unclassified_Saprospiraceae_6_ASV4579	Absence	Presence
155	Unclassified_Saprospiraceae_20_ASV4538	Unclassified_Saprospiraceae_20_ASV4538	Absence	Presence
156	Unclassified_Saprospiraceae_23_ASV4541	Unclassified_Saprospiraceae_23_ASV4541	Absence	Presence
157	Unclassified_Saprospiraceae_22_ASV4540	Unclassified_Saprospiraceae_22_ASV4540	Absence	Presence
158	Unclassified_Saprospiraceae_19_ASV4536	Unclassified_Saprospiraceae_19_ASV4536	Absence	Presence
159	Unclassified_Saprospiraceae_14_ASV4531	Unclassified_Saprospiraceae_14_ASV4531	Absence	Presence
160	Unclassified_Saprospiraceae_45_ASV4565	Unclassified_Saprospiraceae_45_ASV4565	Absence	Presence
161	Lewinella_ASV1259	Lewinella_ASV1259	Absence	Presence
162	Unclassified_Saprospiraceae_25_ASV4543	Unclassified_Saprospiraceae_25_ASV4543	Absence	Presence
163	Lewinella_ASV1261	Lewinella_ASV1261	Absence	Presence
164	Phaeodactylibacter_ASV1637	Phaeodactylibacter_ASV1637	Absence	Presence
165	Phaeodactylibacter_ASV1647	Phaeodactylibacter_ASV1647	Absence	Presence
166	Phaeodactylibacter_ASV1635	Phaeodactylibacter_ASV1635	Absence	Presence
167	Phaeodactylibacter_ASV1646	Phaeodactylibacter_ASV1646	Absence	Presence
168	Unclassified_Saprospiraceae_8_ASV4581	Unclassified_Saprospiraceae_8_ASV4581	Absence	Presence
169	Phaeodactylibacter_ASV1648	Phaeodactylibacter_ASV1648	Absence	Presence
170	Phaeodactylibacter_ASV1641	Phaeodactylibacter_ASV1641	Absence	Presence
171	Unclassified_Saprospiraceae_3_ASV4548	Unclassified_Saprospiraceae_3_ASV4548	Absence	Presence
172	Lewinella_ASV1260	Lewinella_ASV1260	Absence	Presence
173	Unclassified_Saprospiraceae_42_ASV4562	Unclassified_Saprospiraceae_42_ASV4562	Absence	Presence
174	Unclassified_Saprospiraceae_47_ASV4567	Unclassified_Saprospiraceae_47_ASV4567	Absence	Presence
175	Unclassified_Saprospiraceae_43_ASV4563	Unclassified_Saprospiraceae_43_ASV4563	Absence	Presence
176	Unclassified_Saprospiraceae_51_ASV4572	Unclassified_Saprospiraceae_51_ASV4572	Absence	Presence
177	Unclassified_Saprospiraceae_11_ASV4528	Unclassified_Saprospiraceae_11_ASV4528	Absence	Presence
178	Phaeodactylibacter_ASV1644	Phaeodactylibacter_ASV1644	Absence	Presence
179	Unclassified_Saprospiraceae_10_ASV4527	Unclassified_Saprospiraceae_10_ASV4527	Absence	Presence
180	Unclassified_Saprospiraceae_31_ASV4550	Unclassified_Saprospiraceae_31_ASV4550	Absence	Presence
181	Unclassified_Saprospiraceae_32_ASV4551	Unclassified_Saprospiraceae_32_ASV4551	Absence	Presence
182	Unclassified_Saprospiraceae_44_ASV4564	Unclassified_Saprospiraceae_44_ASV4564	Absence	Presence
183	Unclassified_Saprospiraceae_1_ASV4526	Unclassified_Saprospiraceae_1_ASV4526	Absence	Presence
184	Unclassified_Saprospiraceae_27_ASV4545	Unclassified_Saprospiraceae_27_ASV4545	Absence	Presence
185	Unclassified_Saprospiraceae_50_ASV4571	Unclassified_Saprospiraceae_50_ASV4571	Absence	Presence
186	Unclassified_Saprospiraceae_38_ASV4557	Unclassified_Saprospiraceae_38_ASV4557	Absence	Presence
187	Unclassified_Saprospiraceae_46_ASV4566	Unclassified_Saprospiraceae_46_ASV4566	Absence	Presence
188	Unclassified_Saprospiraceae_37_ASV4556	Unclassified_Saprospiraceae_37_ASV4556	Absence	Presence
189	Unclassified_Saprospiraceae_4_ASV4559	Unclassified_Saprospiraceae_4_ASV4559	Absence	Presence
190	Unclassified_Saprospiraceae_35_ASV4554	Unclassified_Saprospiraceae_35_ASV4554	Absence	Presence
191	Unclassified_Saprospiraceae_48_ASV4568	Unclassified_Saprospiraceae_48_ASV4568	Absence	Presence
192	Unclassified_Saprospiraceae_39_ASV4558	Unclassified_Saprospiraceae_39_ASV4558	Absence	Presence
193	Membranicola_ASV1347	Membranicola_ASV1347	Absence	Presence
194	Membranicola_ASV1349	Membranicola_ASV1349	Absence	Presence
195	Membranicola_ASV1348	Membranicola_ASV1348	Absence	Presence
196	Membranicola_ASV1344	Membranicola_ASV1344	Absence	Presence
197	Membranicola_ASV1346	Membranicola_ASV1346	Absence	Presence
198	Unclassified_Saprospiraceae_41_ASV4561	Unclassified_Saprospiraceae_41_ASV4561	Absence	Presence
199	Unclassified_Saprospiraceae_5_ASV4570	Unclassified_Saprospiraceae_5_ASV4570	Absence	Presence
200	Unclassified_Saprospiraceae_54_ASV4575	Unclassified_Saprospiraceae_54_ASV4575	Absence	Presence
201	Unclassified_Saprospiraceae_36_ASV4555	Unclassified_Saprospiraceae_36_ASV4555	Absence	Presence
202	OLB8_ASV1544	OLB8_ASV1544	Absence	Presence
203	Unclassified_Chitinophagaceae_19_ASV3020	Unclassified_Chitinophagaceae_19_ASV3020	Absence	Presence
204	Unclassified_Chitinophagaceae_9_ASV3032	Unclassified_Chitinophagaceae_9_ASV3032	Absence	Presence
205	Flavisolibacter_ASV945	Flavisolibacter_ASV945	Absence	Presence
206	Dinghuibacter_ASV843	Dinghuibacter_ASV843	Absence	Presence
207	Unclassified_Chitinophagaceae_13_ASV3014	Unclassified_Chitinophagaceae_13_ASV3014	Absence	Presence
208	Unclassified_Chitinophagaceae_12_ASV3013	Unclassified_Chitinophagaceae_12_ASV3013	Absence	Presence
209	Unclassified_Chitinophagaceae_18_ASV3019	Unclassified_Chitinophagaceae_18_ASV3019	Absence	Presence
210	Brumimicrobium_ASV374	Brumimicrobium_ASV374	Absence	Presence
211	Unclassified_Chitinophagales_9_ASV3042	Unclassified_Chitinophagales_9_ASV3042	Absence	Presence
212	Unclassified_Bacteroidia_4_ASV2754	Unclassified_Bacteroidia_4_ASV2754	Absence	Presence
213	Unclassified_Chitinophagales_6_ASV3039	Unclassified_Chitinophagales_6_ASV3039	Absence	Presence
214	Unclassified_Bacteroidia_3_ASV2753	Unclassified_Bacteroidia_3_ASV2753	Absence	Presence
215	Unclassified_Chitinophagales_3_ASV3036	Unclassified_Chitinophagales_3_ASV3036	Absence	Presence
216	Unclassified_SB-5_17_ASV4612	Unclassified_SB-5_17_ASV4612	Absence	Presence
217	Unclassified_SB-5_7_ASV4622	Unclassified_SB-5_7_ASV4622	Absence	Presence
218	Unclassified_SB-5_1_ASV4604	Unclassified_SB-5_1_ASV4604	Absence	Presence
219	Unclassified_Bacteroidetes_BD2-2_5_ASV2744	Unclassified_Bacteroidetes_BD2-2_5_ASV2744	Absence	Presence
220	Unclassified_SB-5_19_ASV4614	Unclassified_SB-5_19_ASV4614	Absence	Presence
221	Unclassified_Bacteroidales_8_ASV2722	Unclassified_Bacteroidales_8_ASV2722	Absence	Presence
222	Unclassified_Bacteroidetes_BD2-2_12_ASV2727	Unclassified_Bacteroidetes_BD2-2_12_ASV2727	Absence	Presence
223	Unclassified_Bacteroidales_14_ASV2714	Unclassified_Bacteroidales_14_ASV2714	Absence	Presence
224	Unclassified_Bacteroidetes_BD2-2_21_ASV2737	Unclassified_Bacteroidetes_BD2-2_21_ASV2737	Absence	Presence
225	Unclassified_Marinilabiliaceae_11_ASV3794	Unclassified_Marinilabiliaceae_11_ASV3794	Absence	Presence
226	Unclassified_Marinilabiliaceae_16_ASV3799	Unclassified_Marinilabiliaceae_16_ASV3799	Absence	Presence
227	Unclassified_Marinilabiliaceae_5_ASV3803	Unclassified_Marinilabiliaceae_5_ASV3803	Absence	Presence
228	Unclassified_Bacteroidetes_vadinHA17_2_ASV2750	Unclassified_Bacteroidetes_vadinHA17_2_ASV2750	Absence	Presence
229	Unclassified_Bacteroidales_7_ASV2721	Unclassified_Bacteroidales_7_ASV2721	Absence	Presence
230	Unclassified_SB-5_8_ASV4623	Unclassified_SB-5_8_ASV4623	Absence	Presence
231	Unclassified_SB-5_15_ASV4610	Unclassified_SB-5_15_ASV4610	Absence	Presence
232	Unclassified_SB-5_18_ASV4613	Unclassified_SB-5_18_ASV4613	Absence	Presence
233	Unclassified_SB-5_5_ASV4620	Unclassified_SB-5_5_ASV4620	Absence	Presence
234	Unclassified_SB-5_6_ASV4621	Unclassified_SB-5_6_ASV4621	Absence	Presence
235	Unclassified_SB-5_21_ASV4617	Unclassified_SB-5_21_ASV4617	Absence	Presence
236	Unclassified_SB-5_14_ASV4609	Unclassified_SB-5_14_ASV4609	Absence	Presence
237	Unclassified_SB-5_9_ASV4624	Unclassified_SB-5_9_ASV4624	Absence	Presence
238	Unclassified_SB-5_16_ASV4611	Unclassified_SB-5_16_ASV4611	Absence	Presence
239	Unclassified_SB-5_10_ASV4605	Unclassified_SB-5_10_ASV4605	Absence	Presence
240	Unclassified_Bacteroidales_3_ASV2717	Unclassified_Bacteroidales_3_ASV2717	Absence	Presence
241	Unclassified_Bacteroidetes_BD2-2_6_ASV2745	Unclassified_Bacteroidetes_BD2-2_6_ASV2745	Absence	Presence
242	Unclassified_Bacteroidetes_BD2-2_23_ASV2739	Unclassified_Bacteroidetes_BD2-2_23_ASV2739	Absence	Presence
243	Unclassified_Bacteroidetes_BD2-2_20_ASV2736	Unclassified_Bacteroidetes_BD2-2_20_ASV2736	Absence	Presence
244	Unclassified_Bacteroidetes_BD2-2_9_ASV2748	Unclassified_Bacteroidetes_BD2-2_9_ASV2748	Absence	Presence
245	Unclassified_Bacteroidetes_BD2-2_25_ASV2741	Unclassified_Bacteroidetes_BD2-2_25_ASV2741	Absence	Presence
246	Unclassified_Marinilabiliaceae_6_ASV3804	Unclassified_Marinilabiliaceae_6_ASV3804	Absence	Presence
247	Unclassified_SB-5_12_ASV4607	Unclassified_SB-5_12_ASV4607	Absence	Presence
248	Unclassified_SB-5_13_ASV4608	Unclassified_SB-5_13_ASV4608	Absence	Presence
249	Unclassified_SB-5_20_ASV4616	Unclassified_SB-5_20_ASV4616	Absence	Presence
250	Unclassified_Prolixibacteraceae_7_ASV4240	Unclassified_Prolixibacteraceae_7_ASV4240	Absence	Presence
251	Unclassified_Prolixibacteraceae_8_ASV4241	Unclassified_Prolixibacteraceae_8_ASV4241	Absence	Presence
252	Unclassified_Prolixibacteraceae_6_ASV4239	Unclassified_Prolixibacteraceae_6_ASV4239	Absence	Presence
253	Unclassified_Prolixibacteraceae_5_ASV4238	Unclassified_Prolixibacteraceae_5_ASV4238	Absence	Presence
254	Unclassified_Bacteroidales_4_ASV2718	Unclassified_Bacteroidales_4_ASV2718	Absence	Presence
255	Unclassified_Lentimicrobiaceae_5_ASV3762	Unclassified_Lentimicrobiaceae_5_ASV3762	Absence	Presence
256	Unclassified_Bacteroidetes_BD2-2_1_ASV2724	Unclassified_Bacteroidetes_BD2-2_1_ASV2724	Absence	Presence
257	Unclassified_SB-5_2_ASV4615	Unclassified_SB-5_2_ASV4615	Absence	Presence
258	Unclassified_Bacteroidales_13_ASV2713	Unclassified_Bacteroidales_13_ASV2713	Absence	Presence
259	Unclassified_Bacteroidetes_BD2-2_18_ASV2733	Unclassified_Bacteroidetes_BD2-2_18_ASV2733	Absence	Presence
260	Unclassified_Bacteroidetes_BD2-2_19_ASV2734	Unclassified_Bacteroidetes_BD2-2_19_ASV2734	Absence	Presence
261	Unclassified_Bacteroidetes_BD2-2_4_ASV2743	Unclassified_Bacteroidetes_BD2-2_4_ASV2743	Absence	Presence
262	Robiginitalea_ASV1890	Robiginitalea_ASV1890	Absence	Presence
263	Unclassified_Flavobacteriaceae_40_ASV3426	Unclassified_Flavobacteriaceae_40_ASV3426	Absence	Presence
264	Unclassified_Flavobacteriaceae_19_ASV3402	Unclassified_Flavobacteriaceae_19_ASV3402	Absence	Presence
265	Unclassified_Flavobacteriaceae_21_ASV3405	Unclassified_Flavobacteriaceae_21_ASV3405	Absence	Presence
266	Unclassified_Flavobacteriaceae_53_ASV3440	Unclassified_Flavobacteriaceae_53_ASV3440	Absence	Presence
267	Psychroflexus_ASV1792	Psychroflexus_ASV1792	Absence	Presence
268	Chryseobacterium_ASV549	Chryseobacterium_ASV549	Absence	Presence
269	Unclassified_Flavobacteriaceae_7_ASV3448	Unclassified_Flavobacteriaceae_7_ASV3448	Absence	Presence
270	Unclassified_Flavobacteriaceae_11_ASV3394	Unclassified_Flavobacteriaceae_11_ASV3394	Absence	Presence
271	Unclassified_Flavobacteriaceae_59_ASV3446	Unclassified_Flavobacteriaceae_59_ASV3446	Absence	Presence
272	Unclassified_Flavobacteriaceae_1_ASV3392	Unclassified_Flavobacteriaceae_1_ASV3392	Absence	Presence
273	Unclassified_Weeksellaceae_8_ASV4941	Unclassified_Weeksellaceae_8_ASV4941	Absence	Presence
274	Maribacter_ASV1302	Maribacter_ASV1302	Absence	Presence
275	Unclassified_Flavobacteriaceae_8_ASV3449	Unclassified_Flavobacteriaceae_8_ASV3449	Absence	Presence
276	Gramella_ASV1033	Gramella_ASV1033	Absence	Presence
277	Unclassified_Flavobacteriaceae_45_ASV3431	Unclassified_Flavobacteriaceae_45_ASV3431	Absence	Presence
278	Unclassified_Flavobacteriaceae_12_ASV3395	Unclassified_Flavobacteriaceae_12_ASV3395	Absence	Presence
279	Psychroflexus_ASV1793	Psychroflexus_ASV1793	Absence	Presence
280	NS5_marine_group_ASV1524	NS5_marine_group_ASV1524	Absence	Presence
281	NS5_marine_group_ASV1520	NS5_marine_group_ASV1520	Absence	Presence
282	NS5_marine_group_ASV1522	NS5_marine_group_ASV1522	Absence	Presence
283	NS5_marine_group_ASV1518	NS5_marine_group_ASV1518	Absence	Presence
284	NS5_marine_group_ASV1525	NS5_marine_group_ASV1525	Absence	Presence
285	Unclassified_Flavobacteriaceae_22_ASV3406	Unclassified_Flavobacteriaceae_22_ASV3406	Absence	Presence
286	Unclassified_Flavobacteriaceae_49_ASV3435	Unclassified_Flavobacteriaceae_49_ASV3435	Absence	Presence
287	Bergeyella_ASV310	Bergeyella_ASV310	Absence	Presence
288	Cloacibacterium_ASV563	Cloacibacterium_ASV563	Absence	Presence
289	Chryseobacterium_ASV550	Chryseobacterium_ASV550	Absence	Presence
290	Moheibacter_ASV1406	Moheibacter_ASV1406	Absence	Presence
291	Unclassified_Flavobacteriaceae_33_ASV3418	Unclassified_Flavobacteriaceae_33_ASV3418	Absence	Presence
292	Unclassified_Flavobacteriaceae_18_ASV3401	Unclassified_Flavobacteriaceae_18_ASV3401	Absence	Presence
293	Unclassified_Flavobacteriaceae_15_ASV3398	Unclassified_Flavobacteriaceae_15_ASV3398	Absence	Presence
294	Unclassified_Flavobacteriaceae_35_ASV3420	Unclassified_Flavobacteriaceae_35_ASV3420	Absence	Presence
295	Unclassified_Flavobacteriaceae_14_ASV3397	Unclassified_Flavobacteriaceae_14_ASV3397	Absence	Presence
296	Unclassified_Flavobacteriaceae_46_ASV3432	Unclassified_Flavobacteriaceae_46_ASV3432	Absence	Presence
297	Aequorivita_ASV95	Aequorivita_ASV95	Absence	Presence
298	Capnocytophaga_ASV492	Capnocytophaga_ASV492	Absence	Presence
299	Unclassified_Flavobacteriaceae_44_ASV3430	Unclassified_Flavobacteriaceae_44_ASV3430	Absence	Presence
300	Mesonia_ASV1350	Mesonia_ASV1350	Absence	Presence
301	Salegentibacter_ASV1966	Salegentibacter_ASV1966	Absence	Presence
302	Psychroflexus_ASV1788	Psychroflexus_ASV1788	Absence	Presence
303	Alloprevotella_ASV138	Alloprevotella_ASV138	Absence	Presence
304	Prevotellaceae_UCG-001_ASV1721	Prevotellaceae_UCG-001_ASV1721	Absence	Presence
305	Prevotella_ASV1711	Prevotella_ASV1711	Absence	Presence
306	Unclassified_Prevotellaceae_1_ASV4232	Unclassified_Prevotellaceae_1_ASV4232	Absence	Presence
307	Prevotella_ASV1712	Prevotella_ASV1712	Absence	Presence
308	Prevotella_9_ASV1718	Prevotella_9_ASV1718	Absence	Presence
309	Prevotella_9_ASV1719	Prevotella_9_ASV1719	Absence	Presence
310	Prevotellaceae_UCG-001_ASV1720	Prevotellaceae_UCG-001_ASV1720	Absence	Presence
311	Proteiniphilum_ASV1731	Proteiniphilum_ASV1731	Absence	Presence
312	Bacteroides_ASV273	Bacteroides_ASV273	Absence	Presence
313	Bacteroides_ASV275	Bacteroides_ASV275	Absence	Presence
314	Unclassified_Cytophagales_3_ASV3208	Unclassified_Cytophagales_3_ASV3208	Absence	Presence
315	Unclassified_Cytophagales_6_ASV3211	Unclassified_Cytophagales_6_ASV3211	Absence	Presence
316	Unclassified_Cyclobacteriaceae_5_ASV3199	Unclassified_Cyclobacteriaceae_5_ASV3199	Absence	Presence
317	Unclassified_Cyclobacteriaceae_9_ASV3203	Unclassified_Cyclobacteriaceae_9_ASV3203	Absence	Presence
318	Unclassified_Cytophagales_5_ASV3210	Unclassified_Cytophagales_5_ASV3210	Absence	Presence
319	Hymenobacter_ASV1105	Hymenobacter_ASV1105	Absence	Presence
320	Hymenobacter_ASV1103	Hymenobacter_ASV1103	Absence	Presence
321	Algoriphagus_ASV125	Algoriphagus_ASV125	Absence	Presence
322	Unclassified_Microscillaceae_1_ASV3871	Unclassified_Microscillaceae_1_ASV3871	Absence	Presence
323	Pseudarcicella_ASV1739	Pseudarcicella_ASV1739	Absence	Presence
324	OLB12_ASV1542	OLB12_ASV1542	Absence	Presence
325	Unclassified_Microscillaceae_3_ASV3873	Unclassified_Microscillaceae_3_ASV3873	Absence	Presence
326	Unclassified_Cyclobacteriaceae_22_ASV3186	Unclassified_Cyclobacteriaceae_22_ASV3186	Absence	Presence
327	Unclassified_Cyclobacteriaceae_21_ASV3185	Unclassified_Cyclobacteriaceae_21_ASV3185	Absence	Presence
328	Unclassified_Cyclobacteriaceae_32_ASV3197	Unclassified_Cyclobacteriaceae_32_ASV3197	Absence	Presence
329	Unclassified_Cyclobacteriaceae_14_ASV3177	Unclassified_Cyclobacteriaceae_14_ASV3177	Absence	Presence
330	Unclassified_Cyclobacteriaceae_7_ASV3201	Unclassified_Cyclobacteriaceae_7_ASV3201	Absence	Presence
331	Marinoscillum_ASV1323	Marinoscillum_ASV1323	Absence	Presence
332	Unclassified_Cytophagales_11_ASV3206	Unclassified_Cytophagales_11_ASV3206	Absence	Presence
333	Marinoscillum_ASV1322	Marinoscillum_ASV1322	Absence	Presence
334	Marinoscillum_ASV1326	Marinoscillum_ASV1326	Absence	Presence
335	Marinoscillum_ASV1325	Marinoscillum_ASV1325	Absence	Presence
336	Unclassified_Cyclobacteriaceae_19_ASV3182	Unclassified_Cyclobacteriaceae_19_ASV3182	Absence	Presence
337	Unclassified_Cyclobacteriaceae_4_ASV3198	Unclassified_Cyclobacteriaceae_4_ASV3198	Absence	Presence
338	Unclassified_Cyclobacteriaceae_10_ASV3173	Unclassified_Cyclobacteriaceae_10_ASV3173	Absence	Presence
339	Unclassified_Cyclobacteriaceae_1_ASV3172	Unclassified_Cyclobacteriaceae_1_ASV3172	Absence	Presence
340	Unclassified_Cyclobacteriaceae_3_ASV3194	Unclassified_Cyclobacteriaceae_3_ASV3194	Absence	Presence
341	Unclassified_Cyclobacteriaceae_26_ASV3190	Unclassified_Cyclobacteriaceae_26_ASV3190	Absence	Presence
342	Unclassified_Cyclobacteriaceae_8_ASV3202	Unclassified_Cyclobacteriaceae_8_ASV3202	Absence	Presence
343	Unclassified_Cytophagales_4_ASV3209	Unclassified_Cytophagales_4_ASV3209	Absence	Presence
344	Unclassified_Cyclobacteriaceae_30_ASV3195	Unclassified_Cyclobacteriaceae_30_ASV3195	Absence	Presence
345	Fulvivirga_ASV969	Fulvivirga_ASV969	Absence	Presence
346	Unclassified_Cyclobacteriaceae_29_ASV3193	Unclassified_Cyclobacteriaceae_29_ASV3193	Absence	Presence
347	Unclassified_Cyclobacteriaceae_16_ASV3179	Unclassified_Cyclobacteriaceae_16_ASV3179	Absence	Presence
348	Unclassified_Cyclobacteriaceae_18_ASV3181	Unclassified_Cyclobacteriaceae_18_ASV3181	Absence	Presence
349	Unclassified_Cyclobacteriaceae_28_ASV3192	Unclassified_Cyclobacteriaceae_28_ASV3192	Absence	Presence
350	Unclassified_Cyclobacteriaceae_20_ASV3184	Unclassified_Cyclobacteriaceae_20_ASV3184	Absence	Presence
351	Unclassified_Cytophagales_7_ASV3212	Unclassified_Cytophagales_7_ASV3212	Absence	Presence
352	Unclassified_Cyclobacteriaceae_25_ASV3189	Unclassified_Cyclobacteriaceae_25_ASV3189	Absence	Presence
353	Unclassified_Cyclobacteriaceae_17_ASV3180	Unclassified_Cyclobacteriaceae_17_ASV3180	Absence	Presence
354	Unclassified_Cyclobacteriaceae_31_ASV3196	Unclassified_Cyclobacteriaceae_31_ASV3196	Absence	Presence
355	Unclassified_Cyclobacteriaceae_6_ASV3200	Unclassified_Cyclobacteriaceae_6_ASV3200	Absence	Presence
356	Marinoscillum_ASV1324	Marinoscillum_ASV1324	Absence	Presence
357	Rubrivirga_ASV1944	Rubrivirga_ASV1944	Absence	Presence
358	Unclassified_Rhodothermaceae_18_ASV4468	Unclassified_Rhodothermaceae_18_ASV4468	Absence	Presence
359	Unclassified_Rhodothermaceae_14_ASV4464	Unclassified_Rhodothermaceae_14_ASV4464	Absence	Presence
360	Unclassified_Rhodothermaceae_19_ASV4469	Unclassified_Rhodothermaceae_19_ASV4469	Absence	Presence
361	Unclassified_Rhodothermaceae_1_ASV4459	Unclassified_Rhodothermaceae_1_ASV4459	Absence	Presence
362	Salinibacter_ASV1980	Salinibacter_ASV1980	Absence	Presence
363	Unclassified_Rhodothermaceae_4_ASV4476	Unclassified_Rhodothermaceae_4_ASV4476	Absence	Presence
364	Salinibacter_ASV1974	Salinibacter_ASV1974	Absence	Presence
365	Salinibacter_ASV1983	Salinibacter_ASV1983	Absence	Presence
366	Salinibacter_ASV1979	Salinibacter_ASV1979	Absence	Presence
367	Salinibacter_ASV1969	Salinibacter_ASV1969	Absence	Presence
368	Unclassified_Rhodothermaceae_15_ASV4465	Unclassified_Rhodothermaceae_15_ASV4465	Absence	Presence
369	Salinibacter_ASV1984	Salinibacter_ASV1984	Absence	Presence
370	Salinibacter_ASV1981	Salinibacter_ASV1981	Absence	Presence
371	Unclassified_Rhodothermaceae_6_ASV4478	Unclassified_Rhodothermaceae_6_ASV4478	Absence	Presence
372	Unclassified_Rhodothermaceae_5_ASV4477	Unclassified_Rhodothermaceae_5_ASV4477	Absence	Presence
373	Salinibacter_ASV1977	Salinibacter_ASV1977	Absence	Presence
374	Salinibacter_ASV1973	Salinibacter_ASV1973	Absence	Presence
375	Unclassified_Rhodothermaceae_3_ASV4475	Unclassified_Rhodothermaceae_3_ASV4475	Absence	Presence
376	Salinibacter_ASV1978	Salinibacter_ASV1978	Absence	Presence
377	Salinibacter_ASV1975	Salinibacter_ASV1975	Absence	Presence
378	Salisaeta_ASV2026	Salisaeta_ASV2026	Absence	Presence
379	Salinibacter_ASV1971	Salinibacter_ASV1971	Absence	Presence
380	Unclassified_Rhodothermaceae_2_ASV4470	Unclassified_Rhodothermaceae_2_ASV4470	Absence	Presence
381	Salinibacter_ASV1976	Salinibacter_ASV1976	Absence	Presence
382	Salisaeta_ASV2028	Salisaeta_ASV2028	Absence	Presence
383	Salinibacter_ASV1970	Salinibacter_ASV1970	Absence	Presence
384	Salinibacter_ASV1982	Salinibacter_ASV1982	Absence	Presence
385	Unclassified_Rhodothermaceae_16_ASV4466	Unclassified_Rhodothermaceae_16_ASV4466	Absence	Presence
386	Unclassified_Rhodothermaceae_8_ASV4480	Unclassified_Rhodothermaceae_8_ASV4480	Absence	Presence
387	Unclassified_Rhodothermaceae_23_ASV4474	Unclassified_Rhodothermaceae_23_ASV4474	Absence	Presence
388	Unclassified_Rhodothermaceae_9_ASV4481	Unclassified_Rhodothermaceae_9_ASV4481	Absence	Presence
389	Unclassified_Rhodothermaceae_17_ASV4467	Unclassified_Rhodothermaceae_17_ASV4467	Absence	Presence
390	Unclassified_Rhodothermaceae_21_ASV4472	Unclassified_Rhodothermaceae_21_ASV4472	Absence	Presence
391	Unclassified_Rhodothermaceae_10_ASV4460	Unclassified_Rhodothermaceae_10_ASV4460	Absence	Presence
392	Leptospira_ASV1243	Leptospira_ASV1243	Absence	Presence
393	Unclassified_Sumerlaeia_3_ASV4821	Unclassified_Sumerlaeia_3_ASV4821	Absence	Presence
394	Unclassified_Zixibacteria_12_ASV4976	Unclassified_Zixibacteria_12_ASV4976	Absence	Presence
395	Unclassified_Zixibacteria_2_ASV4984	Unclassified_Zixibacteria_2_ASV4984	Absence	Presence
396	Unclassified_Zixibacteria_28_ASV4993	Unclassified_Zixibacteria_28_ASV4993	Absence	Presence
397	Unclassified_Zixibacteria_4_ASV4996	Unclassified_Zixibacteria_4_ASV4996	Absence	Presence
398	Unclassified_Zixibacteria_21_ASV4986	Unclassified_Zixibacteria_21_ASV4986	Absence	Presence
399	Unclassified_Zixibacteria_9_ASV5001	Unclassified_Zixibacteria_9_ASV5001	Absence	Presence
400	Unclassified_Zixibacteria_15_ASV4979	Unclassified_Zixibacteria_15_ASV4979	Absence	Presence
401	Unclassified_WCHB1-41_4_ASV4916	Unclassified_WCHB1-41_4_ASV4916	Absence	Presence
402	Unclassified_Zixibacteria_27_ASV4992	Unclassified_Zixibacteria_27_ASV4992	Absence	Presence
403	Unclassified_Zixibacteria_14_ASV4978	Unclassified_Zixibacteria_14_ASV4978	Absence	Presence
404	Unclassified_Zixibacteria_1_ASV4973	Unclassified_Zixibacteria_1_ASV4973	Absence	Presence
405	Unclassified_Zixibacteria_19_ASV4983	Unclassified_Zixibacteria_19_ASV4983	Absence	Presence
406	Unclassified_Zixibacteria_26_ASV4991	Unclassified_Zixibacteria_26_ASV4991	Absence	Presence
407	Unclassified_Zixibacteria_24_ASV4989	Unclassified_Zixibacteria_24_ASV4989	Absence	Presence
408	Unclassified_Zixibacteria_25_ASV4990	Unclassified_Zixibacteria_25_ASV4990	Absence	Presence
409	Unclassified_Zixibacteria_18_ASV4982	Unclassified_Zixibacteria_18_ASV4982	Absence	Presence
410	Unclassified_Zixibacteria_10_ASV4974	Unclassified_Zixibacteria_10_ASV4974	Absence	Presence
411	Unclassified_Zixibacteria_22_ASV4987	Unclassified_Zixibacteria_22_ASV4987	Absence	Presence
412	Unclassified_Latescibacterota_2_ASV3736	Unclassified_Latescibacterota_2_ASV3736	Absence	Presence
413	Unclassified_Zixibacteria_5_ASV4997	Unclassified_Zixibacteria_5_ASV4997	Absence	Presence
414	Unclassified_Zixibacteria_16_ASV4980	Unclassified_Zixibacteria_16_ASV4980	Absence	Presence
415	Unclassified_Zixibacteria_11_ASV4975	Unclassified_Zixibacteria_11_ASV4975	Absence	Presence
416	Unclassified_Zixibacteria_13_ASV4977	Unclassified_Zixibacteria_13_ASV4977	Absence	Presence
417	Unclassified_Zixibacteria_20_ASV4985	Unclassified_Zixibacteria_20_ASV4985	Absence	Presence
418	Unclassified_Zixibacteria_3_ASV4995	Unclassified_Zixibacteria_3_ASV4995	Absence	Presence
419	Unclassified_Latescibacterota_7_ASV3742	Unclassified_Latescibacterota_7_ASV3742	Absence	Presence
420	Unclassified_Latescibacterota_9_ASV3744	Unclassified_Latescibacterota_9_ASV3744	Absence	Presence
421	Unclassified_WCHB1-41_3_ASV4915	Unclassified_WCHB1-41_3_ASV4915	Absence	Presence
422	Unclassified_WCHB1-41_8_ASV4920	Unclassified_WCHB1-41_8_ASV4920	Absence	Presence
423	Unclassified_WCHB1-41_5_ASV4917	Unclassified_WCHB1-41_5_ASV4917	Absence	Presence
424	Unclassified_WCHB1-41_9_ASV4921	Unclassified_WCHB1-41_9_ASV4921	Absence	Presence
425	Unclassified_WCHB1-41_2_ASV4914	Unclassified_WCHB1-41_2_ASV4914	Absence	Presence
426	Unclassified_WCHB1-41_7_ASV4919	Unclassified_WCHB1-41_7_ASV4919	Absence	Presence
427	Unclassified_Chitinivibrionia_1_ASV3009	Unclassified_Chitinivibrionia_1_ASV3009	Absence	Presence
428	Unclassified_Acidobacteriales_1_ASV2482	Unclassified_Acidobacteriales_1_ASV2482	Absence	Presence
429	Unclassified_Fermentibacteraceae_1_ASV3378	Unclassified_Fermentibacteraceae_1_ASV3378	Absence	Presence
430	Unclassified_Fermentibacteraceae_2_ASV3379	Unclassified_Fermentibacteraceae_2_ASV3379	Absence	Presence
431	RBG-16-49-21_ASV1810	RBG-16-49-21_ASV1810	Absence	Presence
432	Unclassified_LD1-PA32_ASV1195	Unclassified_LD1-PA32_ASV1195	Absence	Presence
433	Unclassified_0319-6G20_5_ASV2423	Unclassified_0319-6G20_5_ASV2423	Absence	Presence
434	Unclassified_CK-2C2-2_1_ASV3077	Unclassified_CK-2C2-2_1_ASV3077	Absence	Presence
435	Unclassified_Acidobacteriales_2_ASV2483	Unclassified_Acidobacteriales_2_ASV2483	Absence	Presence
436	Candidatus_Latescibacter_ASV438	Candidatus_Latescibacter_ASV438	Absence	Presence
437	Unclassified_Spirochaetaceae_8_ASV4776	Unclassified_Spirochaetaceae_8_ASV4776	Absence	Presence
438	Unclassified_Spirochaetaceae_15_ASV4767	Unclassified_Spirochaetaceae_15_ASV4767	Absence	Presence
439	Unclassified_Spirochaetaceae_10_ASV4762	Unclassified_Spirochaetaceae_10_ASV4762	Absence	Presence
440	Unclassified_Spirochaetaceae_9_ASV4777	Unclassified_Spirochaetaceae_9_ASV4777	Absence	Presence
441	Unclassified_Sva0485_3_ASV4827	Unclassified_Sva0485_3_ASV4827	Absence	Presence
442	Candidatus_Omnitrophus_ASV449	Candidatus_Omnitrophus_ASV449	Absence	Presence
443	Candidatus_Omnitrophus_ASV445	Candidatus_Omnitrophus_ASV445	Absence	Presence
444	Candidatus_Omnitrophus_ASV447	Candidatus_Omnitrophus_ASV447	Absence	Presence
445	Candidatus_Omnitrophus_ASV458	Candidatus_Omnitrophus_ASV458	Absence	Presence
446	Candidatus_Omnitrophus_ASV455	Candidatus_Omnitrophus_ASV455	Absence	Presence
447	Candidatus_Omnitrophus_ASV453	Candidatus_Omnitrophus_ASV453	Absence	Presence
448	Candidatus_Omnitrophus_ASV444	Candidatus_Omnitrophus_ASV444	Absence	Presence
449	Candidatus_Omnitrophus_ASV459	Candidatus_Omnitrophus_ASV459	Absence	Presence
450	Candidatus_Omnitrophus_ASV448	Candidatus_Omnitrophus_ASV448	Absence	Presence
451	Candidatus_Omnitrophus_ASV457	Candidatus_Omnitrophus_ASV457	Absence	Presence
452	Candidatus_Omnitrophus_ASV446	Candidatus_Omnitrophus_ASV446	Absence	Presence
453	Unclassified_Latescibacterota_10_ASV3734	Unclassified_Latescibacterota_10_ASV3734	Absence	Presence
454	Candidatus_Omnitrophus_ASV454	Candidatus_Omnitrophus_ASV454	Absence	Presence
455	Candidatus_Omnitrophus_ASV456	Candidatus_Omnitrophus_ASV456	Absence	Presence
456	Unclassified_Spirochaetaceae_14_ASV4766	Unclassified_Spirochaetaceae_14_ASV4766	Absence	Presence
457	Unclassified_Spirochaetaceae_16_ASV4768	Unclassified_Spirochaetaceae_16_ASV4768	Absence	Presence
458	Brachyspira_ASV353	Brachyspira_ASV353	Absence	Presence
459	Unclassified_Spirochaetaceae_5_ASV4773	Unclassified_Spirochaetaceae_5_ASV4773	Absence	Presence
460	Unclassified_Spirochaetaceae_12_ASV4764	Unclassified_Spirochaetaceae_12_ASV4764	Absence	Presence
461	Unclassified_Spirochaetaceae_7_ASV4775	Unclassified_Spirochaetaceae_7_ASV4775	Absence	Presence
462	Spirochaeta_ASV2159	Spirochaeta_ASV2159	Absence	Presence
463	Spirochaeta_ASV2162	Spirochaeta_ASV2162	Absence	Presence
464	Spirochaeta_ASV2147	Spirochaeta_ASV2147	Absence	Presence
465	Spirochaeta_ASV2168	Spirochaeta_ASV2168	Absence	Presence
466	Spirochaeta_ASV2169	Spirochaeta_ASV2169	Absence	Presence
467	Spirochaeta_ASV2151	Spirochaeta_ASV2151	Absence	Presence
468	Spirochaeta_ASV2161	Spirochaeta_ASV2161	Absence	Presence
469	Spirochaeta_ASV2163	Spirochaeta_ASV2163	Absence	Presence
470	Spirochaeta_ASV2156	Spirochaeta_ASV2156	Absence	Presence
471	Spirochaeta_ASV2170	Spirochaeta_ASV2170	Absence	Presence
472	Spirochaeta_ASV2153	Spirochaeta_ASV2153	Absence	Presence
473	Spirochaeta_ASV2148	Spirochaeta_ASV2148	Absence	Presence
474	Unclassified_Spirochaetaceae_6_ASV4774	Unclassified_Spirochaetaceae_6_ASV4774	Absence	Presence
475	Spirochaeta_2_ASV2180	Spirochaeta_2_ASV2180	Absence	Presence
476	Spirochaeta_ASV2165	Spirochaeta_ASV2165	Absence	Presence
477	Spirochaeta_ASV2150	Spirochaeta_ASV2150	Absence	Presence
478	Spirochaeta_ASV2164	Spirochaeta_ASV2164	Absence	Presence
479	Spirochaeta_ASV2172	Spirochaeta_ASV2172	Absence	Presence
480	Spirochaeta_ASV2171	Spirochaeta_ASV2171	Absence	Presence
481	Spirochaeta_2_ASV2188	Spirochaeta_2_ASV2188	Absence	Presence
482	Spirochaeta_2_ASV2187	Spirochaeta_2_ASV2187	Absence	Presence
483	Spirochaeta_2_ASV2204	Spirochaeta_2_ASV2204	Absence	Presence
484	Spirochaeta_2_ASV2189	Spirochaeta_2_ASV2189	Absence	Presence
485	Spirochaeta_2_ASV2182	Spirochaeta_2_ASV2182	Absence	Presence
486	Spirochaeta_2_ASV2174	Spirochaeta_2_ASV2174	Absence	Presence
487	Spirochaeta_ASV2167	Spirochaeta_ASV2167	Absence	Presence
488	Spirochaeta_ASV2166	Spirochaeta_ASV2166	Absence	Presence
489	Spirochaeta_ASV2149	Spirochaeta_ASV2149	Absence	Presence
490	Spirochaeta_ASV2157	Spirochaeta_ASV2157	Absence	Presence
491	Spirochaeta_ASV2160	Spirochaeta_ASV2160	Absence	Presence
492	Spirochaeta_2_ASV2205	Spirochaeta_2_ASV2205	Absence	Presence
493	Spirochaeta_2_ASV2194	Spirochaeta_2_ASV2194	Absence	Presence
494	Spirochaeta_2_ASV2210	Spirochaeta_2_ASV2210	Absence	Presence
495	Spirochaeta_2_ASV2178	Spirochaeta_2_ASV2178	Absence	Presence
496	Spirochaeta_2_ASV2199	Spirochaeta_2_ASV2199	Absence	Presence
497	Spirochaeta_2_ASV2186	Spirochaeta_2_ASV2186	Absence	Presence
498	Spirochaeta_2_ASV2173	Spirochaeta_2_ASV2173	Absence	Presence
499	Spirochaeta_2_ASV2179	Spirochaeta_2_ASV2179	Absence	Presence
500	Spirochaeta_2_ASV2176	Spirochaeta_2_ASV2176	Absence	Presence
501	Spirochaeta_2_ASV2201	Spirochaeta_2_ASV2201	Absence	Presence
502	Spirochaeta_2_ASV2200	Spirochaeta_2_ASV2200	Absence	Presence
503	Spirochaeta_2_ASV2184	Spirochaeta_2_ASV2184	Absence	Presence
504	Unclassified_Spirochaetaceae_1_ASV4761	Unclassified_Spirochaetaceae_1_ASV4761	Absence	Presence
505	Unclassified_Spirochaetaceae_2_ASV4770	Unclassified_Spirochaetaceae_2_ASV4770	Absence	Presence
506	Spirochaeta_2_ASV2191	Spirochaeta_2_ASV2191	Absence	Presence
507	Spirochaeta_2_ASV2206	Spirochaeta_2_ASV2206	Absence	Presence
508	Spirochaeta_2_ASV2203	Spirochaeta_2_ASV2203	Absence	Presence
509	Spirochaeta_2_ASV2196	Spirochaeta_2_ASV2196	Absence	Presence
510	Spirochaeta_2_ASV2197	Spirochaeta_2_ASV2197	Absence	Presence
511	Spirochaeta_2_ASV2208	Spirochaeta_2_ASV2208	Absence	Presence
512	Spirochaeta_2_ASV2211	Spirochaeta_2_ASV2211	Absence	Presence
513	Sediminispirochaeta_ASV2061	Sediminispirochaeta_ASV2061	Absence	Presence
514	Spirochaeta_2_ASV2190	Spirochaeta_2_ASV2190	Absence	Presence
515	Spirochaeta_ASV2154	Spirochaeta_ASV2154	Absence	Presence
516	Sediminispirochaeta_ASV2057	Sediminispirochaeta_ASV2057	Absence	Presence
517	Alkalispirochaeta_ASV134	Alkalispirochaeta_ASV134	Absence	Presence
518	Unclassified_Spirochaetaceae_3_ASV4771	Unclassified_Spirochaetaceae_3_ASV4771	Absence	Presence
519	Spirochaeta_2_ASV2192	Spirochaeta_2_ASV2192	Absence	Presence
520	Unclassified_Spirochaetaceae_4_ASV4772	Unclassified_Spirochaetaceae_4_ASV4772	Absence	Presence
521	Candidatus_Marispirochaeta_ASV441	Candidatus_Marispirochaeta_ASV441	Absence	Presence
522	Sediminispirochaeta_ASV2060	Sediminispirochaeta_ASV2060	Absence	Presence
523	Sediminispirochaeta_ASV2063	Sediminispirochaeta_ASV2063	Absence	Presence
524	Sediminispirochaeta_ASV2059	Sediminispirochaeta_ASV2059	Absence	Presence
525	Sediminispirochaeta_ASV2054	Sediminispirochaeta_ASV2054	Absence	Presence
526	GWE2-31-10_ASV1038	GWE2-31-10_ASV1038	Absence	Presence
527	GWE2-31-10_ASV1039	GWE2-31-10_ASV1039	Absence	Presence
528	GWE2-31-10_ASV1037	GWE2-31-10_ASV1037	Absence	Presence
529	Spirochaeta_2_ASV2185	Spirochaeta_2_ASV2185	Absence	Presence
530	Spirochaeta_2_ASV2181	Spirochaeta_2_ASV2181	Absence	Presence
531	Alkalispirochaeta_ASV133	Alkalispirochaeta_ASV133	Absence	Presence
532	Unclassified_cvE6_2_ASV3150	Unclassified_cvE6_2_ASV3150	Absence	Presence
533	Chlamydia_ASV511	Chlamydia_ASV511	Absence	Presence
534	Chlamydia_ASV510	Chlamydia_ASV510	Absence	Presence
535	Candidatus_Rhabdochlamydia_ASV465	Candidatus_Rhabdochlamydia_ASV465	Absence	Presence
536	Unclassified_Parachlamydiaceae_1_ASV4022	Unclassified_Parachlamydiaceae_1_ASV4022	Absence	Presence
537	Unclassified_Parachlamydiaceae_5_ASV4026	Unclassified_Parachlamydiaceae_5_ASV4026	Absence	Presence
538	Unclassified_Sumerlaeia_2_ASV4820	Unclassified_Sumerlaeia_2_ASV4820	Absence	Presence
539	Unclassified_Sumerlaeia_4_ASV4822	Unclassified_Sumerlaeia_4_ASV4822	Absence	Presence
540	Unclassified_Subgroup_22_7_ASV4810	Unclassified_Subgroup_22_7_ASV4810	Absence	Presence
541	Unclassified_Subgroup_22_8_ASV4811	Unclassified_Subgroup_22_8_ASV4811	Absence	Presence
542	Unclassified_Subgroup_22_3_ASV4806	Unclassified_Subgroup_22_3_ASV4806	Absence	Presence
543	Unclassified_Subgroup_22_6_ASV4809	Unclassified_Subgroup_22_6_ASV4809	Absence	Presence
544	Unclassified_vadinHA49_2_ASV4878	Unclassified_vadinHA49_2_ASV4878	Absence	Presence
545	Unclassified_vadinHA49_20_ASV4879	Unclassified_vadinHA49_20_ASV4879	Absence	Presence
546	Unclassified_vadinHA49_19_ASV4877	Unclassified_vadinHA49_19_ASV4877	Absence	Presence
547	Unclassified_Pla4_lineage_12_ASV4172	Unclassified_Pla4_lineage_12_ASV4172	Absence	Presence
548	Unclassified_Pla4_lineage_3_ASV4176	Unclassified_Pla4_lineage_3_ASV4176	Absence	Presence
549	Unclassified_Pla4_lineage_9_ASV4182	Unclassified_Pla4_lineage_9_ASV4182	Absence	Presence
550	Unclassified_Pla4_lineage_10_ASV4170	Unclassified_Pla4_lineage_10_ASV4170	Absence	Presence
551	Unclassified_Planctomycetota_9_ASV4220	Unclassified_Planctomycetota_9_ASV4220	Absence	Presence
552	Unclassified_Planctomycetota_2_ASV4213	Unclassified_Planctomycetota_2_ASV4213	Absence	Presence
553	Unclassified_Planctomycetota_14_ASV4209	Unclassified_Planctomycetota_14_ASV4209	Absence	Presence
554	Unclassified_Pla4_lineage_2_ASV4175	Unclassified_Pla4_lineage_2_ASV4175	Absence	Presence
555	Unclassified_OM190_12_ASV4003	Unclassified_OM190_12_ASV4003	Absence	Presence
556	Unclassified_Planctomycetota_6_ASV4217	Unclassified_Planctomycetota_6_ASV4217	Absence	Presence
557	Unclassified_Planctomycetota_16_ASV4211	Unclassified_Planctomycetota_16_ASV4211	Absence	Presence
558	Unclassified_Planctomycetota_13_ASV4208	Unclassified_Planctomycetota_13_ASV4208	Absence	Presence
559	Unclassified_Planctomycetota_8_ASV4219	Unclassified_Planctomycetota_8_ASV4219	Absence	Presence
560	Unclassified_Pla3_lineage_10_ASV4156	Unclassified_Pla3_lineage_10_ASV4156	Absence	Presence
561	Unclassified_Planctomycetota_17_ASV4212	Unclassified_Planctomycetota_17_ASV4212	Absence	Presence
562	Unclassified_Planctomycetota_7_ASV4218	Unclassified_Planctomycetota_7_ASV4218	Absence	Presence
563	Unclassified_Planctomycetota_10_ASV4205	Unclassified_Planctomycetota_10_ASV4205	Absence	Presence
564	Unclassified_Pla4_lineage_8_ASV4181	Unclassified_Pla4_lineage_8_ASV4181	Absence	Presence
565	Unclassified_Planctomycetota_5_ASV4216	Unclassified_Planctomycetota_5_ASV4216	Absence	Presence
566	Unclassified_DG-20_1_ASV3302	Unclassified_DG-20_1_ASV3302	Absence	Presence
567	Unclassified_DG-20_2_ASV3303	Unclassified_DG-20_2_ASV3303	Absence	Presence
568	Unclassified_ST-NAGAB-D1_ASV2235	Unclassified_ST-NAGAB-D1_ASV2235	Absence	Presence
569	Unclassified_SM23-30_1_ASV4733	Unclassified_SM23-30_1_ASV4733	Absence	Presence
570	Unclassified_SM23-30_2_ASV4734	Unclassified_SM23-30_2_ASV4734	Absence	Presence
571	Unclassified_SG8-4_1_ASV4715	Unclassified_SG8-4_1_ASV4715	Absence	Presence
572	Unclassified_SG8-4_3_ASV4717	Unclassified_SG8-4_3_ASV4717	Absence	Presence
573	Unclassified_SG8-4_5_ASV4719	Unclassified_SG8-4_5_ASV4719	Absence	Presence
574	Unclassified_SG8-4_7_ASV4721	Unclassified_SG8-4_7_ASV4721	Absence	Presence
575	Unclassified_SG8-4_8_ASV4722	Unclassified_SG8-4_8_ASV4722	Absence	Presence
576	Unclassified_SG8-4_4_ASV4718	Unclassified_SG8-4_4_ASV4718	Absence	Presence
577	Unclassified_4572-13_1_ASV2426	Unclassified_4572-13_1_ASV2426	Absence	Presence
578	SM1A02_ASV2099	SM1A02_ASV2099	Absence	Presence
579	SM1A02_ASV2097	SM1A02_ASV2097	Absence	Presence
580	Unclassified_Phycisphaeraceae_3_ASV4116	Unclassified_Phycisphaeraceae_3_ASV4116	Absence	Presence
581	CL500-3_ASV561	CL500-3_ASV561	Absence	Presence
582	Urania-1B-19_marine_sediment_group_ASV5024	Urania-1B-19_marine_sediment_group_ASV5024	Absence	Presence
583	Urania-1B-19_marine_sediment_group_ASV5026	Urania-1B-19_marine_sediment_group_ASV5026	Absence	Presence
584	Urania-1B-19_marine_sediment_group_ASV5022	Urania-1B-19_marine_sediment_group_ASV5022	Absence	Presence
585	Urania-1B-19_marine_sediment_group_ASV5021	Urania-1B-19_marine_sediment_group_ASV5021	Absence	Presence
586	Urania-1B-19_marine_sediment_group_ASV5020	Urania-1B-19_marine_sediment_group_ASV5020	Absence	Presence
587	Unclassified_Tepidisphaerales_1_ASV4843	Unclassified_Tepidisphaerales_1_ASV4843	Absence	Presence
588	Unclassified_WD2101_soil_group_5_ASV4926	Unclassified_WD2101_soil_group_5_ASV4926	Absence	Presence
589	Unclassified_WD2101_soil_group_4_ASV4925	Unclassified_WD2101_soil_group_4_ASV4925	Absence	Presence
590	Unclassified_Phycisphaeraceae_15_ASV4109	Unclassified_Phycisphaeraceae_15_ASV4109	Absence	Presence
591	Unclassified_Phycisphaeraceae_6_ASV4119	Unclassified_Phycisphaeraceae_6_ASV4119	Absence	Presence
592	Unclassified_Phycisphaeraceae_4_ASV4117	Unclassified_Phycisphaeraceae_4_ASV4117	Absence	Presence
593	Unclassified_Phycisphaeraceae_7_ASV4120	Unclassified_Phycisphaeraceae_7_ASV4120	Absence	Presence
594	Unclassified_Phycisphaeraceae_9_ASV4122	Unclassified_Phycisphaeraceae_9_ASV4122	Absence	Presence
595	Unclassified_Phycisphaeraceae_20_ASV4115	Unclassified_Phycisphaeraceae_20_ASV4115	Absence	Presence
596	Unclassified_Phycisphaeraceae_5_ASV4118	Unclassified_Phycisphaeraceae_5_ASV4118	Absence	Presence
597	Unclassified_Phycisphaerae_2_ASV4124	Unclassified_Phycisphaerae_2_ASV4124	Absence	Presence
598	Unclassified_Phycisphaeraceae_13_ASV4107	Unclassified_Phycisphaeraceae_13_ASV4107	Absence	Presence
599	Unclassified_Phycisphaeraceae_17_ASV4111	Unclassified_Phycisphaeraceae_17_ASV4111	Absence	Presence
600	Unclassified_Phycisphaeraceae_11_ASV4105	Unclassified_Phycisphaeraceae_11_ASV4105	Absence	Presence
601	Unclassified_Phycisphaeraceae_19_ASV4113	Unclassified_Phycisphaeraceae_19_ASV4113	Absence	Presence
602	Unclassified_Phycisphaeraceae_10_ASV4104	Unclassified_Phycisphaeraceae_10_ASV4104	Absence	Presence
603	Unclassified_Phycisphaeraceae_18_ASV4112	Unclassified_Phycisphaeraceae_18_ASV4112	Absence	Presence
604	Unclassified_Phycisphaeraceae_12_ASV4106	Unclassified_Phycisphaeraceae_12_ASV4106	Absence	Presence
605	Unclassified_Phycisphaeraceae_1_ASV4103	Unclassified_Phycisphaeraceae_1_ASV4103	Absence	Presence
606	Unclassified_Phycisphaeraceae_2_ASV4114	Unclassified_Phycisphaeraceae_2_ASV4114	Absence	Presence
607	Unclassified_L21-RPul-D3_ASV1148	Unclassified_L21-RPul-D3_ASV1148	Absence	Presence
608	Unclassified_AKAU3564_sediment_group_5_ASV2526	Unclassified_AKAU3564_sediment_group_5_ASV2526	Absence	Presence
609	Unclassified_AKAU3564_sediment_group_1_ASV2515	Unclassified_AKAU3564_sediment_group_1_ASV2515	Absence	Presence
610	Unclassified_AKAU3564_sediment_group_16_ASV2522	Unclassified_AKAU3564_sediment_group_16_ASV2522	Absence	Presence
611	Unclassified_AKAU3564_sediment_group_6_ASV2527	Unclassified_AKAU3564_sediment_group_6_ASV2527	Absence	Presence
612	Unclassified_AKAU3564_sediment_group_13_ASV2519	Unclassified_AKAU3564_sediment_group_13_ASV2519	Absence	Presence
613	Unclassified_AKAU3564_sediment_group_7_ASV2528	Unclassified_AKAU3564_sediment_group_7_ASV2528	Absence	Presence
614	Unclassified_AKAU3564_sediment_group_11_ASV2517	Unclassified_AKAU3564_sediment_group_11_ASV2517	Absence	Presence
615	Unclassified_AKAU3564_sediment_group_14_ASV2520	Unclassified_AKAU3564_sediment_group_14_ASV2520	Absence	Presence
616	Unclassified_AKAU3564_sediment_group_4_ASV2525	Unclassified_AKAU3564_sediment_group_4_ASV2525	Absence	Presence
617	Unclassified_AKAU3564_sediment_group_9_ASV2530	Unclassified_AKAU3564_sediment_group_9_ASV2530	Absence	Presence
618	Unclassified_AKAU3564_sediment_group_10_ASV2516	Unclassified_AKAU3564_sediment_group_10_ASV2516	Absence	Presence
619	Unclassified_AKAU3564_sediment_group_8_ASV2529	Unclassified_AKAU3564_sediment_group_8_ASV2529	Absence	Presence
620	Unclassified_AKAU3564_sediment_group_15_ASV2521	Unclassified_AKAU3564_sediment_group_15_ASV2521	Absence	Presence
621	Unclassified_AKAU3564_sediment_group_3_ASV2524	Unclassified_AKAU3564_sediment_group_3_ASV2524	Absence	Presence
622	Unclassified_AKAU3564_sediment_group_12_ASV2518	Unclassified_AKAU3564_sediment_group_12_ASV2518	Absence	Presence
623	Unclassified_Phycisphaerae_1_ASV4123	Unclassified_Phycisphaerae_1_ASV4123	Absence	Presence
624	Unclassified_mle1-8_4_ASV3890	Unclassified_mle1-8_4_ASV3890	Absence	Presence
625	Unclassified_mle1-8_2_ASV3888	Unclassified_mle1-8_2_ASV3888	Absence	Presence
626	Unclassified_mle1-8_1_ASV3887	Unclassified_mle1-8_1_ASV3887	Absence	Presence
627	Unclassified_mle1-8_7_ASV3893	Unclassified_mle1-8_7_ASV3893	Absence	Presence
628	Unclassified_mle1-8_6_ASV3892	Unclassified_mle1-8_6_ASV3892	Absence	Presence
629	Unclassified_CCM11a_1_ASV2999	Unclassified_CCM11a_1_ASV2999	Absence	Presence
630	Unclassified_CCM11a_6_ASV3004	Unclassified_CCM11a_6_ASV3004	Absence	Presence
631	Unclassified_CCM11a_2_ASV3000	Unclassified_CCM11a_2_ASV3000	Absence	Presence
632	Unclassified_CCM11a_5_ASV3003	Unclassified_CCM11a_5_ASV3003	Absence	Presence
633	Gemmata_ASV996	Gemmata_ASV996	Absence	Presence
634	Unclassified_Gemmataceae_11_ASV3557	Unclassified_Gemmataceae_11_ASV3557	Absence	Presence
635	Unclassified_Gemmataceae_7_ASV3568	Unclassified_Gemmataceae_7_ASV3568	Absence	Presence
636	Unclassified_Gemmataceae_12_ASV3558	Unclassified_Gemmataceae_12_ASV3558	Absence	Presence
637	Unclassified_Isosphaeraceae_6_ASV3648	Unclassified_Isosphaeraceae_6_ASV3648	Absence	Presence
638	Unclassified_Isosphaeraceae_5_ASV3647	Unclassified_Isosphaeraceae_5_ASV3647	Absence	Presence
639	Unclassified_Isosphaeraceae_4_ASV3646	Unclassified_Isosphaeraceae_4_ASV3646	Absence	Presence
640	Tundrisphaera_ASV2391	Tundrisphaera_ASV2391	Absence	Presence
641	Aquisphaera_ASV208	Aquisphaera_ASV208	Absence	Presence
642	Paludisphaera_ASV1584	Paludisphaera_ASV1584	Absence	Presence
643	Unclassified_Isosphaeraceae_8_ASV3650	Unclassified_Isosphaeraceae_8_ASV3650	Absence	Presence
644	Gemmata_ASV1002	Gemmata_ASV1002	Absence	Presence
645	Gemmata_ASV1000	Gemmata_ASV1000	Absence	Presence
646	Gemmata_ASV1001	Gemmata_ASV1001	Absence	Presence
647	Unclassified_Gemmataceae_10_ASV3556	Unclassified_Gemmataceae_10_ASV3556	Absence	Presence
648	Unclassified_Planctomycetes_2_ASV4203	Unclassified_Planctomycetes_2_ASV4203	Absence	Presence
649	Unclassified_Planctomycetales_16_ASV4190	Unclassified_Planctomycetales_16_ASV4190	Absence	Presence
650	Unclassified_Planctomycetales_7_ASV4199	Unclassified_Planctomycetales_7_ASV4199	Absence	Presence
651	Unclassified_Planctomycetales_1_ASV4183	Unclassified_Planctomycetales_1_ASV4183	Absence	Presence
652	Unclassified_Rubinisphaeraceae_3_ASV4486	Unclassified_Rubinisphaeraceae_3_ASV4486	Absence	Presence
653	Unclassified_Planctomycetales_5_ASV4197	Unclassified_Planctomycetales_5_ASV4197	Absence	Presence
654	SH-PL14_ASV2086	SH-PL14_ASV2086	Absence	Presence
655	SH-PL14_ASV2082	SH-PL14_ASV2082	Absence	Presence
656	SH-PL14_ASV2084	SH-PL14_ASV2084	Absence	Presence
657	Planctomicrobium_ASV1697	Planctomicrobium_ASV1697	Absence	Presence
658	Unclassified_Rubinisphaeraceae_1_ASV4484	Unclassified_Rubinisphaeraceae_1_ASV4484	Absence	Presence
659	Unclassified_Rubinisphaeraceae_2_ASV4485	Unclassified_Rubinisphaeraceae_2_ASV4485	Absence	Presence
660	Rubinisphaera_ASV1935	Rubinisphaera_ASV1935	Absence	Presence
661	Rubinisphaera_ASV1934	Rubinisphaera_ASV1934	Absence	Presence
662	Unclassified_Planctomycetales_9_ASV4201	Unclassified_Planctomycetales_9_ASV4201	Absence	Presence
663	Unclassified_Planctomycetales_15_ASV4189	Unclassified_Planctomycetales_15_ASV4189	Absence	Presence
664	Unclassified_Gimesiaceae_1_ASV3585	Unclassified_Gimesiaceae_1_ASV3585	Absence	Presence
665	Unclassified_Planctomycetales_13_ASV4187	Unclassified_Planctomycetales_13_ASV4187	Absence	Presence
666	Unclassified_Gimesiaceae_4_ASV3588	Unclassified_Gimesiaceae_4_ASV3588	Absence	Presence
667	Unclassified_Planctomycetales_4_ASV4196	Unclassified_Planctomycetales_4_ASV4196	Absence	Presence
668	Unclassified_Planctomycetales_19_ASV4193	Unclassified_Planctomycetales_19_ASV4193	Absence	Presence
669	Unclassified_Pirellulaceae_17_ASV4133	Unclassified_Pirellulaceae_17_ASV4133	Absence	Presence
670	Pir4_lineage_ASV1677	Pir4_lineage_ASV1677	Absence	Presence
671	Unclassified_Pirellulaceae_9_ASV4152	Unclassified_Pirellulaceae_9_ASV4152	Absence	Presence
672	Pirellula_ASV1690	Pirellula_ASV1690	Absence	Presence
673	Pirellula_ASV1696	Pirellula_ASV1696	Absence	Presence
674	Pir4_lineage_ASV1684	Pir4_lineage_ASV1684	Absence	Presence
675	Pir4_lineage_ASV1676	Pir4_lineage_ASV1676	Absence	Presence
676	Rhodopirellula_ASV1854	Rhodopirellula_ASV1854	Absence	Presence
677	Rhodopirellula_ASV1862	Rhodopirellula_ASV1862	Absence	Presence
678	Rubripirellula_ASV1940	Rubripirellula_ASV1940	Absence	Presence
679	Blastopirellula_ASV341	Blastopirellula_ASV341	Absence	Presence
680	Blastopirellula_ASV339	Blastopirellula_ASV339	Absence	Presence
681	Rhodopirellula_ASV1857	Rhodopirellula_ASV1857	Absence	Presence
682	Pirellula_ASV1693	Pirellula_ASV1693	Absence	Presence
683	Rhodopirellula_ASV1853	Rhodopirellula_ASV1853	Absence	Presence
684	Rhodopirellula_ASV1858	Rhodopirellula_ASV1858	Absence	Presence
685	Blastopirellula_ASV338	Blastopirellula_ASV338	Absence	Presence
686	Rhodopirellula_ASV1856	Rhodopirellula_ASV1856	Absence	Presence
687	Rhodopirellula_ASV1855	Rhodopirellula_ASV1855	Absence	Presence
688	Unclassified_Pirellulaceae_2_ASV4136	Unclassified_Pirellulaceae_2_ASV4136	Absence	Presence
689	Pir4_lineage_ASV1679	Pir4_lineage_ASV1679	Absence	Presence
690	Pir4_lineage_ASV1682	Pir4_lineage_ASV1682	Absence	Presence
691	Unclassified_Pirellulaceae_14_ASV4130	Unclassified_Pirellulaceae_14_ASV4130	Absence	Presence
692	Unclassified_Pirellulaceae_19_ASV4135	Unclassified_Pirellulaceae_19_ASV4135	Absence	Presence
693	Unclassified_Pirellulaceae_8_ASV4151	Unclassified_Pirellulaceae_8_ASV4151	Absence	Presence
694	Unclassified_Pirellulaceae_20_ASV4137	Unclassified_Pirellulaceae_20_ASV4137	Absence	Presence
695	Unclassified_Pirellulaceae_25_ASV4142	Unclassified_Pirellulaceae_25_ASV4142	Absence	Presence
696	Unclassified_Pirellulaceae_18_ASV4134	Unclassified_Pirellulaceae_18_ASV4134	Absence	Presence
697	Unclassified_Pirellulaceae_23_ASV4140	Unclassified_Pirellulaceae_23_ASV4140	Absence	Presence
698	Rhodopirellula_ASV1859	Rhodopirellula_ASV1859	Absence	Presence
699	Unclassified_OM190_9_ASV4014	Unclassified_OM190_9_ASV4014	Absence	Presence
700	Unclassified_Planctomycetota_4_ASV4215	Unclassified_Planctomycetota_4_ASV4215	Absence	Presence
701	Candidatus_Kuenenia_ASV437	Candidatus_Kuenenia_ASV437	Absence	Presence
702	Unclassified_OM190_1_ASV4000	Unclassified_OM190_1_ASV4000	Absence	Presence
703	Unclassified_OM190_11_ASV4002	Unclassified_OM190_11_ASV4002	Absence	Presence
704	Unclassified_OM190_8_ASV4013	Unclassified_OM190_8_ASV4013	Absence	Presence
705	Unclassified_OM190_15_ASV4006	Unclassified_OM190_15_ASV4006	Absence	Presence
706	Unclassified_OM190_4_ASV4009	Unclassified_OM190_4_ASV4009	Absence	Presence
707	Unclassified_OM190_7_ASV4012	Unclassified_OM190_7_ASV4012	Absence	Presence
708	Unclassified_OM190_10_ASV4001	Unclassified_OM190_10_ASV4001	Absence	Presence
709	Unclassified_OM190_3_ASV4008	Unclassified_OM190_3_ASV4008	Absence	Presence
710	Unclassified_028H05-P-BN-P5_ASV13	Unclassified_028H05-P-BN-P5_ASV13	Absence	Presence
711	Unclassified_Pla4_lineage_5_ASV4178	Unclassified_Pla4_lineage_5_ASV4178	Absence	Presence
712	Unclassified_Pla4_lineage_13_ASV4173	Unclassified_Pla4_lineage_13_ASV4173	Absence	Presence
713	Unclassified_Pla4_lineage_14_ASV4174	Unclassified_Pla4_lineage_14_ASV4174	Absence	Presence
714	Unclassified_Pla4_lineage_1_ASV4169	Unclassified_Pla4_lineage_1_ASV4169	Absence	Presence
715	Unclassified_Pla4_lineage_11_ASV4171	Unclassified_Pla4_lineage_11_ASV4171	Absence	Presence
716	Unclassified_BD7-11_3_ASV2873	Unclassified_BD7-11_3_ASV2873	Absence	Presence
717	Unclassified_BD7-11_4_ASV2874	Unclassified_BD7-11_4_ASV2874	Absence	Presence
718	Unclassified_Pla3_lineage_7_ASV4166	Unclassified_Pla3_lineage_7_ASV4166	Absence	Presence
719	Unclassified_Pla3_lineage_3_ASV4162	Unclassified_Pla3_lineage_3_ASV4162	Absence	Presence
720	Unclassified_OM190_13_ASV4004	Unclassified_OM190_13_ASV4004	Absence	Presence
721	Unclassified_Pla3_lineage_5_ASV4164	Unclassified_Pla3_lineage_5_ASV4164	Absence	Presence
722	Unclassified_Pla3_lineage_9_ASV4168	Unclassified_Pla3_lineage_9_ASV4168	Absence	Presence
723	Unclassified_Pla3_lineage_8_ASV4167	Unclassified_Pla3_lineage_8_ASV4167	Absence	Presence
724	Unclassified_Pla3_lineage_4_ASV4163	Unclassified_Pla3_lineage_4_ASV4163	Absence	Presence
725	Unclassified_Pla3_lineage_6_ASV4165	Unclassified_Pla3_lineage_6_ASV4165	Absence	Presence
726	Unclassified_Pla3_lineage_1_ASV4155	Unclassified_Pla3_lineage_1_ASV4155	Absence	Presence
727	Unclassified_Pla3_lineage_14_ASV4160	Unclassified_Pla3_lineage_14_ASV4160	Absence	Presence
728	Unclassified_Planctomycetota_15_ASV4210	Unclassified_Planctomycetota_15_ASV4210	Absence	Presence
729	Unclassified_Pla3_lineage_11_ASV4157	Unclassified_Pla3_lineage_11_ASV4157	Absence	Presence
730	Unclassified_Pla3_lineage_13_ASV4159	Unclassified_Pla3_lineage_13_ASV4159	Absence	Presence
731	Unclassified_Pla3_lineage_2_ASV4161	Unclassified_Pla3_lineage_2_ASV4161	Absence	Presence
732	Unclassified_Pla4_lineage_7_ASV4180	Unclassified_Pla4_lineage_7_ASV4180	Absence	Presence
733	Unclassified_Subgroup_9_2_ASV4818	Unclassified_Subgroup_9_2_ASV4818	Absence	Presence
734	Unclassified_Vicinamibacteraceae_3_ASV4899	Unclassified_Vicinamibacteraceae_3_ASV4899	Absence	Presence
735	Unclassified_Vicinamibacteraceae_4_ASV4900	Unclassified_Vicinamibacteraceae_4_ASV4900	Absence	Presence
736	Unclassified_Vicinamibacterales_6_ASV4909	Unclassified_Vicinamibacterales_6_ASV4909	Absence	Presence
737	Unclassified_Vicinamibacteraceae_5_ASV4901	Unclassified_Vicinamibacteraceae_5_ASV4901	Absence	Presence
738	Unclassified_Subgroup_22_1_ASV4804	Unclassified_Subgroup_22_1_ASV4804	Absence	Presence
739	Cerasicoccus_ASV506	Cerasicoccus_ASV506	Absence	Presence
740	Verruc-01_ASV5044	Verruc-01_ASV5044	Absence	Presence
741	Verruc-01_ASV5045	Verruc-01_ASV5045	Absence	Presence
742	Verruc-01_ASV5042	Verruc-01_ASV5042	Absence	Presence
743	Unclassified_Puniceicoccaceae_1_ASV4267	Unclassified_Puniceicoccaceae_1_ASV4267	Absence	Presence
744	Lentimonas_ASV1234	Lentimonas_ASV1234	Absence	Presence
745	Unclassified_Latescibacteraceae_10_ASV3724	Unclassified_Latescibacteraceae_10_ASV3724	Absence	Presence
746	Unclassified_Latescibacteraceae_8_ASV3731	Unclassified_Latescibacteraceae_8_ASV3731	Absence	Presence
747	Unclassified_Latescibacteraceae_6_ASV3729	Unclassified_Latescibacteraceae_6_ASV3729	Absence	Presence
748	Unclassified_Latescibacteraceae_9_ASV3732	Unclassified_Latescibacteraceae_9_ASV3732	Absence	Presence
749	Unclassified_Latescibacteraceae_4_ASV3727	Unclassified_Latescibacteraceae_4_ASV3727	Absence	Presence
750	Unclassified_Lenti-02_ASV1231	Unclassified_Lenti-02_ASV1231	Absence	Presence
751	Unclassified_SS1-B-02-17_1_ASV4786	Unclassified_SS1-B-02-17_1_ASV4786	Absence	Presence
752	Unclassified_Lentisphaeria_1_ASV3767	Unclassified_Lentisphaeria_1_ASV3767	Absence	Presence
753	Unclassified_Victivallales_1_ASV4911	Unclassified_Victivallales_1_ASV4911	Absence	Presence
754	Unclassified_SS1-B-02-17_6_ASV4791	Unclassified_SS1-B-02-17_6_ASV4791	Absence	Presence
755	Unclassified_SS1-B-02-17_4_ASV4789	Unclassified_SS1-B-02-17_4_ASV4789	Absence	Presence
756	Unclassified_SS1-B-02-17_2_ASV4787	Unclassified_SS1-B-02-17_2_ASV4787	Absence	Presence
757	LS-NOB_ASV1274	LS-NOB_ASV1274	Absence	Presence
758	Unclassified_Aminicenantales_3_ASV2582	Unclassified_Aminicenantales_3_ASV2582	Absence	Presence
759	Unclassified_Firmicutes_6_ASV3391	Unclassified_Firmicutes_6_ASV3391	Absence	Presence
760	Unclassified_Aminicenantales_2_ASV2581	Unclassified_Aminicenantales_2_ASV2581	Absence	Presence
761	Unclassified_Aminicenantales_5_ASV2584	Unclassified_Aminicenantales_5_ASV2584	Absence	Presence
762	Unclassified_Methylacidiphilaceae_4_ASV3830	Unclassified_Methylacidiphilaceae_4_ASV3830	Absence	Presence
763	Unclassified_Methylacidiphilaceae_3_ASV3829	Unclassified_Methylacidiphilaceae_3_ASV3829	Absence	Presence
764	Unclassified_Pedosphaeraceae_4_ASV4082	Unclassified_Pedosphaeraceae_4_ASV4082	Absence	Presence
765	Unclassified_Pedosphaeraceae_2_ASV4078	Unclassified_Pedosphaeraceae_2_ASV4078	Absence	Presence
766	Unclassified_Pedosphaeraceae_3_ASV4080	Unclassified_Pedosphaeraceae_3_ASV4080	Absence	Presence
767	Unclassified_Pedosphaeraceae_1_ASV4077	Unclassified_Pedosphaeraceae_1_ASV4077	Absence	Presence
768	Unclassified_Methylacidiphilaceae_1_ASV3827	Unclassified_Methylacidiphilaceae_1_ASV3827	Absence	Presence
769	Luteolibacter_ASV1285	Luteolibacter_ASV1285	Absence	Presence
770	Rubritalea_ASV1941	Rubritalea_ASV1941	Absence	Presence
771	Unclassified_Rubritaleaceae_1_ASV4487	Unclassified_Rubritaleaceae_1_ASV4487	Absence	Presence
772	Luteolibacter_ASV1290	Luteolibacter_ASV1290	Absence	Presence
773	Roseibacillus_ASV1903	Roseibacillus_ASV1903	Absence	Presence
774	Unclassified_DEV007_3_ASV3295	Unclassified_DEV007_3_ASV3295	Absence	Presence
775	Unclassified_DEV007_1_ASV3293	Unclassified_DEV007_1_ASV3293	Absence	Presence
776	Unclassified_DEV007_7_ASV3299	Unclassified_DEV007_7_ASV3299	Absence	Presence
777	Persicirhabdus_ASV1632	Persicirhabdus_ASV1632	Absence	Presence
778	Akkermansia_ASV106	Akkermansia_ASV106	Absence	Presence
779	Unclassified_Verrucomicrobiaceae_1_ASV4894	Unclassified_Verrucomicrobiaceae_1_ASV4894	Absence	Presence
780	Unclassified_DEV007_2_ASV3294	Unclassified_DEV007_2_ASV3294	Absence	Presence
781	Unclassified_DEV007_6_ASV3298	Unclassified_DEV007_6_ASV3298	Absence	Presence
782	Unclassified_Chthoniobacteraceae_1_ASV3071	Unclassified_Chthoniobacteraceae_1_ASV3071	Absence	Presence
783	Candidatus_Udaeobacter_ASV481	Candidatus_Udaeobacter_ASV481	Absence	Presence
784	Candidatus_Udaeobacter_ASV484	Candidatus_Udaeobacter_ASV484	Absence	Presence
785	Candidatus_Udaeobacter_ASV482	Candidatus_Udaeobacter_ASV482	Absence	Presence
786	Unclassified_Chthoniobacterales_5_ASV3076	Unclassified_Chthoniobacterales_5_ASV3076	Absence	Presence
787	Chthoniobacter_ASV553	Chthoniobacter_ASV553	Absence	Presence
788	Terrimicrobium_ASV2336	Terrimicrobium_ASV2336	Absence	Presence
789	LD29_ASV1203	LD29_ASV1203	Absence	Presence
790	Unclassified_Chthoniobacterales_3_ASV3074	Unclassified_Chthoniobacterales_3_ASV3074	Absence	Presence
791	Unclassified_Chthoniobacterales_2_ASV3073	Unclassified_Chthoniobacterales_2_ASV3073	Absence	Presence
792	Unclassified_Chthoniobacterales_4_ASV3075	Unclassified_Chthoniobacterales_4_ASV3075	Absence	Presence
793	Candidatus_Udaeobacter_ASV483	Candidatus_Udaeobacter_ASV483	Absence	Presence
794	Candidatus_Udaeobacter_ASV487	Candidatus_Udaeobacter_ASV487	Absence	Presence
795	Unclassified_TA06_ASV2317	Unclassified_TA06_ASV2317	Absence	Presence
796	Unclassified_Aminicenantales_4_ASV2583	Unclassified_Aminicenantales_4_ASV2583	Absence	Presence
797	Unclassified_Aminicenantales_1_ASV2580	Unclassified_Aminicenantales_1_ASV2580	Absence	Presence
798	Unclassified_vadinHA49_3_ASV4880	Unclassified_vadinHA49_3_ASV4880	Absence	Presence
799	Unclassified_vadinHA49_8_ASV4885	Unclassified_vadinHA49_8_ASV4885	Absence	Presence
800	Unclassified_vadinHA49_10_ASV4868	Unclassified_vadinHA49_10_ASV4868	Absence	Presence
801	Unclassified_vadinHA49_14_ASV4872	Unclassified_vadinHA49_14_ASV4872	Absence	Presence
802	Unclassified_vadinHA49_5_ASV4882	Unclassified_vadinHA49_5_ASV4882	Absence	Presence
803	Unclassified_Planctomycetota_11_ASV4206	Unclassified_Planctomycetota_11_ASV4206	Absence	Presence
804	Unclassified_vadinHA49_12_ASV4870	Unclassified_vadinHA49_12_ASV4870	Absence	Presence
805	Unclassified_Subgroup_18_1_ASV4801	Unclassified_Subgroup_18_1_ASV4801	Absence	Presence
806	Unclassified_Subgroup_18_2_ASV4802	Unclassified_Subgroup_18_2_ASV4802	Absence	Presence
807	Unclassified_Acidobacteriota_7_ASV2491	Unclassified_Acidobacteriota_7_ASV2491	Absence	Presence
808	Unclassified_Subgroup_18_3_ASV4803	Unclassified_Subgroup_18_3_ASV4803	Absence	Presence
809	Unclassified_Acidobacteriota_3_ASV2487	Unclassified_Acidobacteriota_3_ASV2487	Absence	Presence
810	Unclassified_Acidobacteriota_2_ASV2486	Unclassified_Acidobacteriota_2_ASV2486	Absence	Presence
811	Unclassified_Acidobacteriota_4_ASV2488	Unclassified_Acidobacteriota_4_ASV2488	Absence	Presence
812	Unclassified_Acidobacteriota_6_ASV2490	Unclassified_Acidobacteriota_6_ASV2490	Absence	Presence
813	Hydrogenispora_ASV1095	Hydrogenispora_ASV1095	Absence	Presence
814	Unclassified_Acidobacteriota_5_ASV2489	Unclassified_Acidobacteriota_5_ASV2489	Absence	Presence
815	Unclassified_DS-100_3_ASV3310	Unclassified_DS-100_3_ASV3310	Absence	Presence
816	Subgroup_10_ASV2266	Subgroup_10_ASV2266	Absence	Presence
817	Subgroup_10_ASV2264	Subgroup_10_ASV2264	Absence	Presence
818	Subgroup_10_ASV2261	Subgroup_10_ASV2261	Absence	Presence
819	Subgroup_10_ASV2262	Subgroup_10_ASV2262	Absence	Presence
820	Unclassified_Subgroup_7_2_ASV4816	Unclassified_Subgroup_7_2_ASV4816	Absence	Presence
821	Subgroup_10_ASV2268	Subgroup_10_ASV2268	Absence	Presence
822	Subgroup_10_ASV2263	Subgroup_10_ASV2263	Absence	Presence
823	Subgroup_10_ASV2265	Subgroup_10_ASV2265	Absence	Presence
824	Subgroup_10_ASV2267	Subgroup_10_ASV2267	Absence	Presence
825	Subgroup_10_ASV2260	Subgroup_10_ASV2260	Absence	Presence
826	Subgroup_23_ASV2271	Subgroup_23_ASV2271	Absence	Presence
827	Subgroup_23_ASV2270	Subgroup_23_ASV2270	Absence	Presence
828	Unclassified_Subgroup_22_4_ASV4807	Unclassified_Subgroup_22_4_ASV4807	Absence	Presence
829	Unclassified_SAR324_clade(Marine_group_B)_1_ASV4589	Unclassified_SAR324_clade(Marine_group_B)_1_ASV4589	Absence	Presence
830	Unclassified_Alphaproteobacteria_35_ASV2569	Unclassified_Alphaproteobacteria_35_ASV2569	Absence	Presence
831	Unclassified_VHS-B3-70_ASV5048	Unclassified_VHS-B3-70_ASV5048	Absence	Presence
832	Unclassified_Sumerlaeia_1_ASV4819	Unclassified_Sumerlaeia_1_ASV4819	Absence	Presence
833	Unclassified_Latescibacterota_4_ASV3739	Unclassified_Latescibacterota_4_ASV3739	Absence	Presence
834	Unclassified_Thermodesulfovibrionia_1_ASV4855	Unclassified_Thermodesulfovibrionia_1_ASV4855	Absence	Presence
835	Unclassified_Thermodesulfovibrionia_3_ASV4857	Unclassified_Thermodesulfovibrionia_3_ASV4857	Absence	Presence
836	Unclassified_Subgroup_26_3_ASV4814	Unclassified_Subgroup_26_3_ASV4814	Absence	Presence
837	Unclassified_Subgroup_26_1_ASV4812	Unclassified_Subgroup_26_1_ASV4812	Absence	Presence
838	Unclassified_Subgroup_26_2_ASV4813	Unclassified_Subgroup_26_2_ASV4813	Absence	Presence
839	Unclassified_bacteriap25_2_ASV2702	Unclassified_bacteriap25_2_ASV2702	Absence	Presence
840	Unclassified_Firmicutes_3_ASV3388	Unclassified_Firmicutes_3_ASV3388	Absence	Presence
841	RB41_ASV1807	RB41_ASV1807	Absence	Presence
842	Unclassified_Blastocatellaceae_4_ASV2915	Unclassified_Blastocatellaceae_4_ASV2915	Absence	Presence
843	Unclassified_Blastocatellaceae_3_ASV2914	Unclassified_Blastocatellaceae_3_ASV2914	Absence	Presence
844	Unclassified_JS1_1_ASV3664	Unclassified_JS1_1_ASV3664	Absence	Presence
845	Unclassified_JS1_2_ASV3665	Unclassified_JS1_2_ASV3665	Absence	Presence
846	Unclassified_JS1_3_ASV3666	Unclassified_JS1_3_ASV3666	Absence	Presence
847	Unclassified_Latescibacteraceae_1_ASV3723	Unclassified_Latescibacteraceae_1_ASV3723	Absence	Presence
848	Unclassified_Latescibacteraceae_5_ASV3728	Unclassified_Latescibacteraceae_5_ASV3728	Absence	Presence
849	Unclassified_Latescibacteraceae_2_ASV3725	Unclassified_Latescibacteraceae_2_ASV3725	Absence	Presence
850	Unclassified_KD4-96_ASV1136	Unclassified_KD4-96_ASV1136	Absence	Presence
851	Unclassified_S085_1_ASV4507	Unclassified_S085_1_ASV4507	Absence	Presence
852	Unclassified_OLB14_ASV1543	Unclassified_OLB14_ASV1543	Absence	Presence
853	Unclassified_TK10_1_ASV4861	Unclassified_TK10_1_ASV4861	Absence	Presence
854	Unclassified_TK10_2_ASV4862	Unclassified_TK10_2_ASV4862	Absence	Presence
855	Unclassified_SAR324_clade(Marine_group_B)_11_ASV4591	Unclassified_SAR324_clade(Marine_group_B)_11_ASV4591	Absence	Presence
856	Unclassified_SAR324_clade(Marine_group_B)_10_ASV4590	Unclassified_SAR324_clade(Marine_group_B)_10_ASV4590	Absence	Presence
857	Unclassified_SAR324_clade(Marine_group_B)_13_ASV4593	Unclassified_SAR324_clade(Marine_group_B)_13_ASV4593	Absence	Presence
858	Unclassified_SAR324_clade(Marine_group_B)_5_ASV4599	Unclassified_SAR324_clade(Marine_group_B)_5_ASV4599	Absence	Presence
859	Nitrospira_ASV1488	Nitrospira_ASV1488	Absence	Presence
860	Nitrospira_ASV1487	Nitrospira_ASV1487	Absence	Presence
861	Nitrospira_ASV1486	Nitrospira_ASV1486	Absence	Presence
862	Unclassified_Armatimonadota_1_ASV2657	Unclassified_Armatimonadota_1_ASV2657	Absence	Presence
863	Unclassified_JG30-KF-CM45_4_ASV3659	Unclassified_JG30-KF-CM45_4_ASV3659	Absence	Presence
864	Unclassified_JG30-KF-CM45_1_ASV3656	Unclassified_JG30-KF-CM45_1_ASV3656	Absence	Presence
865	Unclassified_JG30-KF-CM45_5_ASV3660	Unclassified_JG30-KF-CM45_5_ASV3660	Absence	Presence
866	Legionella_ASV1220	Legionella_ASV1220	Absence	Presence
867	Candidatus_Chlorothrix_ASV426	Candidatus_Chlorothrix_ASV426	Absence	Presence
868	Candidatus_Chlorothrix_ASV421	Candidatus_Chlorothrix_ASV421	Absence	Presence
869	Candidatus_Chlorothrix_ASV424	Candidatus_Chlorothrix_ASV424	Absence	Presence
870	Candidatus_Chlorothrix_ASV423	Candidatus_Chlorothrix_ASV423	Absence	Presence
871	Candidatus_Chlorothrix_ASV422	Candidatus_Chlorothrix_ASV422	Absence	Presence
872	Candidatus_Chlorothrix_ASV425	Candidatus_Chlorothrix_ASV425	Absence	Presence
873	Unclassified_Roseiflexaceae_1_ASV4483	Unclassified_Roseiflexaceae_1_ASV4483	Absence	Presence
874	Unclassified_SBR1031_23_ASV4641	Unclassified_SBR1031_23_ASV4641	Absence	Presence
875	Unclassified_SBR1031_72_ASV4695	Unclassified_SBR1031_72_ASV4695	Absence	Presence
876	Unclassified_SBR1031_33_ASV4652	Unclassified_SBR1031_33_ASV4652	Absence	Presence
877	Unclassified_SBR1031_57_ASV4678	Unclassified_SBR1031_57_ASV4678	Absence	Presence
878	Unclassified_SBR1031_28_ASV4646	Unclassified_SBR1031_28_ASV4646	Absence	Presence
879	Unclassified_SBR1031_44_ASV4664	Unclassified_SBR1031_44_ASV4664	Absence	Presence
880	Unclassified_SBR1031_45_ASV4665	Unclassified_SBR1031_45_ASV4665	Absence	Presence
881	Unclassified_SBR1031_26_ASV4644	Unclassified_SBR1031_26_ASV4644	Absence	Presence
882	Unclassified_SBR1031_1_ASV4625	Unclassified_SBR1031_1_ASV4625	Absence	Presence
883	Unclassified_SBR1031_85_ASV4709	Unclassified_SBR1031_85_ASV4709	Absence	Presence
884	Unclassified_SBR1031_15_ASV4632	Unclassified_SBR1031_15_ASV4632	Absence	Presence
885	Unclassified_SBR1031_84_ASV4708	Unclassified_SBR1031_84_ASV4708	Absence	Presence
886	Unclassified_SBR1031_34_ASV4653	Unclassified_SBR1031_34_ASV4653	Absence	Presence
887	Unclassified_SBR1031_35_ASV4654	Unclassified_SBR1031_35_ASV4654	Absence	Presence
888	Unclassified_SBR1031_52_ASV4673	Unclassified_SBR1031_52_ASV4673	Absence	Presence
889	Unclassified_SBR1031_8_ASV4703	Unclassified_SBR1031_8_ASV4703	Absence	Presence
890	Unclassified_SBR1031_86_ASV4710	Unclassified_SBR1031_86_ASV4710	Absence	Presence
891	Unclassified_A4b_22_ASV2444	Unclassified_A4b_22_ASV2444	Absence	Presence
892	Unclassified_A4b_23_ASV2445	Unclassified_A4b_23_ASV2445	Absence	Presence
893	Unclassified_A4b_9_ASV2460	Unclassified_A4b_9_ASV2460	Absence	Presence
894	Unclassified_A4b_25_ASV2447	Unclassified_A4b_25_ASV2447	Absence	Presence
895	Unclassified_A4b_13_ASV2434	Unclassified_A4b_13_ASV2434	Absence	Presence
896	Unclassified_A4b_4_ASV2455	Unclassified_A4b_4_ASV2455	Absence	Presence
897	Unclassified_A4b_14_ASV2435	Unclassified_A4b_14_ASV2435	Absence	Presence
898	Unclassified_A4b_29_ASV2451	Unclassified_A4b_29_ASV2451	Absence	Presence
899	Unclassified_A4b_18_ASV2439	Unclassified_A4b_18_ASV2439	Absence	Presence
900	Unclassified_A4b_8_ASV2459	Unclassified_A4b_8_ASV2459	Absence	Presence
901	Unclassified_A4b_27_ASV2449	Unclassified_A4b_27_ASV2449	Absence	Presence
902	Unclassified_A4b_10_ASV2431	Unclassified_A4b_10_ASV2431	Absence	Presence
903	Unclassified_A4b_19_ASV2440	Unclassified_A4b_19_ASV2440	Absence	Presence
904	Unclassified_A4b_17_ASV2438	Unclassified_A4b_17_ASV2438	Absence	Presence
905	Unclassified_A4b_26_ASV2448	Unclassified_A4b_26_ASV2448	Absence	Presence
906	Unclassified_A4b_1_ASV2430	Unclassified_A4b_1_ASV2430	Absence	Presence
907	Unclassified_A4b_30_ASV2453	Unclassified_A4b_30_ASV2453	Absence	Presence
908	Unclassified_A4b_21_ASV2443	Unclassified_A4b_21_ASV2443	Absence	Presence
909	Unclassified_A4b_28_ASV2450	Unclassified_A4b_28_ASV2450	Absence	Presence
910	Unclassified_A4b_7_ASV2458	Unclassified_A4b_7_ASV2458	Absence	Presence
911	Unclassified_A4b_11_ASV2432	Unclassified_A4b_11_ASV2432	Absence	Presence
912	Unclassified_A4b_24_ASV2446	Unclassified_A4b_24_ASV2446	Absence	Presence
913	Unclassified_SBR1031_68_ASV4690	Unclassified_SBR1031_68_ASV4690	Absence	Presence
914	Unclassified_SBR1031_50_ASV4671	Unclassified_SBR1031_50_ASV4671	Absence	Presence
915	Unclassified_SBR1031_42_ASV4662	Unclassified_SBR1031_42_ASV4662	Absence	Presence
916	Unclassified_SBR1031_2_ASV4637	Unclassified_SBR1031_2_ASV4637	Absence	Presence
917	Unclassified_SBR1031_79_ASV4702	Unclassified_SBR1031_79_ASV4702	Absence	Presence
918	Unclassified_SBR1031_60_ASV4682	Unclassified_SBR1031_60_ASV4682	Absence	Presence
919	Unclassified_SBR1031_6_ASV4681	Unclassified_SBR1031_6_ASV4681	Absence	Presence
920	Unclassified_SBR1031_16_ASV4633	Unclassified_SBR1031_16_ASV4633	Absence	Presence
921	Unclassified_SBR1031_46_ASV4666	Unclassified_SBR1031_46_ASV4666	Absence	Presence
922	Unclassified_SBR1031_29_ASV4647	Unclassified_SBR1031_29_ASV4647	Absence	Presence
923	Unclassified_SBR1031_66_ASV4688	Unclassified_SBR1031_66_ASV4688	Absence	Presence
924	Unclassified_SBR1031_4_ASV4659	Unclassified_SBR1031_4_ASV4659	Absence	Presence
925	Unclassified_SBR1031_17_ASV4634	Unclassified_SBR1031_17_ASV4634	Absence	Presence
926	Unclassified_Ardenticatenales_3_ASV2646	Unclassified_Ardenticatenales_3_ASV2646	Absence	Presence
927	Unclassified_Caldilineaceae_1_ASV2963	Unclassified_Caldilineaceae_1_ASV2963	Absence	Presence
928	Unclassified_Ardenticatenales_4_ASV2647	Unclassified_Ardenticatenales_4_ASV2647	Absence	Presence
929	Unclassified_Ardenticatenales_14_ASV2638	Unclassified_Ardenticatenales_14_ASV2638	Absence	Presence
930	Unclassified_Ardenticatenales_8_ASV2651	Unclassified_Ardenticatenales_8_ASV2651	Absence	Presence
931	Unclassified_Ardenticatenales_16_ASV2640	Unclassified_Ardenticatenales_16_ASV2640	Absence	Presence
932	Unclassified_Ardenticatenales_11_ASV2635	Unclassified_Ardenticatenales_11_ASV2635	Absence	Presence
933	Unclassified_Ardenticatenales_7_ASV2650	Unclassified_Ardenticatenales_7_ASV2650	Absence	Presence
934	Unclassified_Ardenticatenales_19_ASV2643	Unclassified_Ardenticatenales_19_ASV2643	Absence	Presence
935	Unclassified_Ardenticatenales_5_ASV2648	Unclassified_Ardenticatenales_5_ASV2648	Absence	Presence
936	Unclassified_Ardenticatenales_20_ASV2645	Unclassified_Ardenticatenales_20_ASV2645	Absence	Presence
937	Unclassified_Ardenticatenales_2_ASV2644	Unclassified_Ardenticatenales_2_ASV2644	Absence	Presence
938	Unclassified_Anaerolineae_1_ASV2623	Unclassified_Anaerolineae_1_ASV2623	Absence	Presence
939	Unclassified_Anaerolineae_3_ASV2625	Unclassified_Anaerolineae_3_ASV2625	Absence	Presence
940	Unclassified_Anaerolineae_2_ASV2624	Unclassified_Anaerolineae_2_ASV2624	Absence	Presence
941	Unclassified_SBR1031_80_ASV4704	Unclassified_SBR1031_80_ASV4704	Absence	Presence
942	Unclassified_SBR1031_39_ASV4658	Unclassified_SBR1031_39_ASV4658	Absence	Presence
943	Unclassified_SBR1031_83_ASV4707	Unclassified_SBR1031_83_ASV4707	Absence	Presence
944	Unclassified_SBR1031_78_ASV4701	Unclassified_SBR1031_78_ASV4701	Absence	Presence
945	Unclassified_SBR1031_22_ASV4640	Unclassified_SBR1031_22_ASV4640	Absence	Presence
946	Unclassified_SBR1031_38_ASV4657	Unclassified_SBR1031_38_ASV4657	Absence	Presence
947	Unclassified_SBR1031_36_ASV4655	Unclassified_SBR1031_36_ASV4655	Absence	Presence
948	Unclassified_SBR1031_77_ASV4700	Unclassified_SBR1031_77_ASV4700	Absence	Presence
949	Unclassified_SBR1031_61_ASV4683	Unclassified_SBR1031_61_ASV4683	Absence	Presence
950	Unclassified_SBR1031_58_ASV4679	Unclassified_SBR1031_58_ASV4679	Absence	Presence
951	Unclassified_SBR1031_51_ASV4672	Unclassified_SBR1031_51_ASV4672	Absence	Presence
952	Unclassified_SBR1031_48_ASV4668	Unclassified_SBR1031_48_ASV4668	Absence	Presence
953	Unclassified_SBR1031_75_ASV4698	Unclassified_SBR1031_75_ASV4698	Absence	Presence
954	Unclassified_SBR1031_13_ASV4630	Unclassified_SBR1031_13_ASV4630	Absence	Presence
955	Unclassified_SBR1031_14_ASV4631	Unclassified_SBR1031_14_ASV4631	Absence	Presence
956	Unclassified_SBR1031_54_ASV4675	Unclassified_SBR1031_54_ASV4675	Absence	Presence
957	Unclassified_SBR1031_62_ASV4684	Unclassified_SBR1031_62_ASV4684	Absence	Presence
958	Unclassified_SBR1031_5_ASV4670	Unclassified_SBR1031_5_ASV4670	Absence	Presence
959	Unclassified_SBR1031_64_ASV4686	Unclassified_SBR1031_64_ASV4686	Absence	Presence
960	Unclassified_SBR1031_37_ASV4656	Unclassified_SBR1031_37_ASV4656	Absence	Presence
961	Unclassified_SBR1031_25_ASV4643	Unclassified_SBR1031_25_ASV4643	Absence	Presence
962	Unclassified_SBR1031_18_ASV4635	Unclassified_SBR1031_18_ASV4635	Absence	Presence
963	Unclassified_SBR1031_55_ASV4676	Unclassified_SBR1031_55_ASV4676	Absence	Presence
964	Unclassified_SBR1031_63_ASV4685	Unclassified_SBR1031_63_ASV4685	Absence	Presence
965	Unclassified_SBR1031_7_ASV4692	Unclassified_SBR1031_7_ASV4692	Absence	Presence
966	Unclassified_SBR1031_31_ASV4650	Unclassified_SBR1031_31_ASV4650	Absence	Presence
967	Unclassified_SBR1031_11_ASV4628	Unclassified_SBR1031_11_ASV4628	Absence	Presence
968	Unclassified_SBR1031_20_ASV4638	Unclassified_SBR1031_20_ASV4638	Absence	Presence
969	Unclassified_SBR1031_56_ASV4677	Unclassified_SBR1031_56_ASV4677	Absence	Presence
970	Unclassified_SBR1031_41_ASV4661	Unclassified_SBR1031_41_ASV4661	Absence	Presence
971	Unclassified_SBR1031_10_ASV4627	Unclassified_SBR1031_10_ASV4627	Absence	Presence
972	Unclassified_SBR1031_43_ASV4663	Unclassified_SBR1031_43_ASV4663	Absence	Presence
973	Unclassified_SBR1031_76_ASV4699	Unclassified_SBR1031_76_ASV4699	Absence	Presence
974	Unclassified_SBR1031_21_ASV4639	Unclassified_SBR1031_21_ASV4639	Absence	Presence
975	Unclassified_SBR1031_73_ASV4696	Unclassified_SBR1031_73_ASV4696	Absence	Presence
976	Unclassified_Ardenticatenales_18_ASV2642	Unclassified_Ardenticatenales_18_ASV2642	Absence	Presence
977	Unclassified_Ardenticatenales_10_ASV2634	Unclassified_Ardenticatenales_10_ASV2634	Absence	Presence
978	Unclassified_Ardenticatenales_6_ASV2649	Unclassified_Ardenticatenales_6_ASV2649	Absence	Presence
979	Unclassified_Ardenticatenales_13_ASV2637	Unclassified_Ardenticatenales_13_ASV2637	Absence	Presence
980	Unclassified_Ardenticatenales_15_ASV2639	Unclassified_Ardenticatenales_15_ASV2639	Absence	Presence
981	Unclassified_Ardenticatenales_1_ASV2633	Unclassified_Ardenticatenales_1_ASV2633	Absence	Presence
982	Unclassified_Anaerolineaceae_21_ASV2598	Unclassified_Anaerolineaceae_21_ASV2598	Absence	Presence
983	Unclassified_Anaerolineaceae_26_ASV2603	Unclassified_Anaerolineaceae_26_ASV2603	Absence	Presence
984	Unclassified_Anaerolineaceae_22_ASV2599	Unclassified_Anaerolineaceae_22_ASV2599	Absence	Presence
985	Unclassified_Anaerolineaceae_15_ASV2591	Unclassified_Anaerolineaceae_15_ASV2591	Absence	Presence
986	Unclassified_Anaerolineaceae_9_ASV2622	Unclassified_Anaerolineaceae_9_ASV2622	Absence	Presence
987	Unclassified_Anaerolineaceae_32_ASV2610	Unclassified_Anaerolineaceae_32_ASV2610	Absence	Presence
988	Unclassified_Anaerolineaceae_17_ASV2593	Unclassified_Anaerolineaceae_17_ASV2593	Absence	Presence
989	Unclassified_Anaerolineaceae_12_ASV2588	Unclassified_Anaerolineaceae_12_ASV2588	Absence	Presence
990	Unclassified_Anaerolineaceae_1_ASV2585	Unclassified_Anaerolineaceae_1_ASV2585	Absence	Presence
991	Unclassified_Anaerolineaceae_14_ASV2590	Unclassified_Anaerolineaceae_14_ASV2590	Absence	Presence
992	Unclassified_Anaerolineaceae_37_ASV2615	Unclassified_Anaerolineaceae_37_ASV2615	Absence	Presence
993	Unclassified_Anaerolineaceae_31_ASV2609	Unclassified_Anaerolineaceae_31_ASV2609	Absence	Presence
994	Unclassified_Anaerolineaceae_27_ASV2604	Unclassified_Anaerolineaceae_27_ASV2604	Absence	Presence
995	Unclassified_Anaerolineaceae_29_ASV2606	Unclassified_Anaerolineaceae_29_ASV2606	Absence	Presence
996	Unclassified_Anaerolineaceae_33_ASV2611	Unclassified_Anaerolineaceae_33_ASV2611	Absence	Presence
997	Unclassified_Anaerolineaceae_18_ASV2594	Unclassified_Anaerolineaceae_18_ASV2594	Absence	Presence
998	Unclassified_Anaerolineaceae_30_ASV2608	Unclassified_Anaerolineaceae_30_ASV2608	Absence	Presence
999	Anaerolineaceae_UCG-001_ASV191	Anaerolineaceae_UCG-001_ASV191	Absence	Presence
1000	Unclassified_Anaerolineaceae_2_ASV2596	Unclassified_Anaerolineaceae_2_ASV2596	Absence	Presence
1001	Unclassified_Anaerolineaceae_20_ASV2597	Unclassified_Anaerolineaceae_20_ASV2597	Absence	Presence
1002	Unclassified_Anaerolineaceae_23_ASV2600	Unclassified_Anaerolineaceae_23_ASV2600	Absence	Presence
1003	Unclassified_Anaerolineaceae_38_ASV2616	Unclassified_Anaerolineaceae_38_ASV2616	Absence	Presence
1004	Unclassified_Anaerolineaceae_16_ASV2592	Unclassified_Anaerolineaceae_16_ASV2592	Absence	Presence
1005	Unclassified_SBR1031_69_ASV4691	Unclassified_SBR1031_69_ASV4691	Absence	Presence
1006	Pelolinea_ASV1618	Pelolinea_ASV1618	Absence	Presence
1007	ADurb.Bin120_ASV93	ADurb.Bin120_ASV93	Absence	Presence
1008	Unclassified_Anaerolineaceae_3_ASV2607	Unclassified_Anaerolineaceae_3_ASV2607	Absence	Presence
1009	Unclassified_Anaerolineaceae_8_ASV2621	Unclassified_Anaerolineaceae_8_ASV2621	Absence	Presence
1010	Unclassified_Anaerolineaceae_10_ASV2586	Unclassified_Anaerolineaceae_10_ASV2586	Absence	Presence
1011	Unclassified_Anaerolineaceae_24_ASV2601	Unclassified_Anaerolineaceae_24_ASV2601	Absence	Presence
1012	Unclassified_Anaerolineaceae_35_ASV2613	Unclassified_Anaerolineaceae_35_ASV2613	Absence	Presence
1013	Unclassified_Anaerolineaceae_4_ASV2617	Unclassified_Anaerolineaceae_4_ASV2617	Absence	Presence
1014	Unclassified_SBR1031_30_ASV4649	Unclassified_SBR1031_30_ASV4649	Absence	Presence
1015	Unclassified_SAR202_clade_6_ASV4588	Unclassified_SAR202_clade_6_ASV4588	Absence	Presence
1016	Unclassified_SAR202_clade_5_ASV4587	Unclassified_SAR202_clade_5_ASV4587	Absence	Presence
1017	Unclassified_SAR202_clade_2_ASV4584	Unclassified_SAR202_clade_2_ASV4584	Absence	Presence
1018	Unclassified_JG30-KF-CM66_1_ASV3661	Unclassified_JG30-KF-CM66_1_ASV3661	Absence	Presence
1019	Unclassified_SAR202_clade_3_ASV4585	Unclassified_SAR202_clade_3_ASV4585	Absence	Presence
1020	Unclassified_GIF9_ASV1013	Unclassified_GIF9_ASV1013	Absence	Presence
1021	Unclassified_AB-539-J10_1_ASV2462	Unclassified_AB-539-J10_1_ASV2462	Absence	Presence
1022	Unclassified_AB-539-J10_1_ASV2461	Unclassified_AB-539-J10_1_ASV2461	Absence	Presence
1023	Unclassified_Dehalococcoidia_4_ASV3229	Unclassified_Dehalococcoidia_4_ASV3229	Absence	Presence
1024	Unclassified_Dehalococcoidia_2_ASV3227	Unclassified_Dehalococcoidia_2_ASV3227	Absence	Presence
1025	Unclassified_Dehalococcoidia_3_ASV3228	Unclassified_Dehalococcoidia_3_ASV3228	Absence	Presence
1026	Unclassified_GIF3_1_ASV3583	Unclassified_GIF3_1_ASV3583	Absence	Presence
1027	Unclassified_SAR202_clade_4_ASV4586	Unclassified_SAR202_clade_4_ASV4586	Absence	Presence
1028	Candidatus_Koribacter_ASV436	Candidatus_Koribacter_ASV436	Absence	Presence
1029	Unclassified_Acidobacteriales_3_ASV2484	Unclassified_Acidobacteriales_3_ASV2484	Absence	Presence
1030	Unclassified_PAUC26f_ASV1608	Unclassified_PAUC26f_ASV1608	Absence	Presence
1031	Bryobacter_ASV380	Bryobacter_ASV380	Absence	Presence
1032	Bryobacter_ASV378	Bryobacter_ASV378	Absence	Presence
1033	CL500-29_marine_group_ASV560	CL500-29_marine_group_ASV560	Absence	Presence
1034	Iamia_ASV1121	Iamia_ASV1121	Absence	Presence
1035	Unclassified_Microtrichales_2_ASV3878	Unclassified_Microtrichales_2_ASV3878	Absence	Presence
1036	Unclassified_Microtrichales_6_ASV3882	Unclassified_Microtrichales_6_ASV3882	Absence	Presence
1037	Unclassified_Microtrichaceae_3_ASV3876	Unclassified_Microtrichaceae_3_ASV3876	Absence	Presence
1038	Unclassified_Actinomarinales_11_ASV2500	Unclassified_Actinomarinales_11_ASV2500	Absence	Presence
1039	Unclassified_Actinomarinales_5_ASV2508	Unclassified_Actinomarinales_5_ASV2508	Absence	Presence
1040	Unclassified_Actinomarinales_9_ASV2512	Unclassified_Actinomarinales_9_ASV2512	Absence	Presence
1041	Unclassified_Actinomarinales_12_ASV2501	Unclassified_Actinomarinales_12_ASV2501	Absence	Presence
1042	Unclassified_Actinomarinales_8_ASV2511	Unclassified_Actinomarinales_8_ASV2511	Absence	Presence
1043	Unclassified_Actinomarinales_10_ASV2499	Unclassified_Actinomarinales_10_ASV2499	Absence	Presence
1044	Unclassified_Actinomarinales_14_ASV2503	Unclassified_Actinomarinales_14_ASV2503	Absence	Presence
1045	Unclassified_Actinomarinales_2_ASV2505	Unclassified_Actinomarinales_2_ASV2505	Absence	Presence
1046	Unclassified_Actinomarinales_15_ASV2504	Unclassified_Actinomarinales_15_ASV2504	Absence	Presence
1047	Unclassified_Actinomarinales_4_ASV2507	Unclassified_Actinomarinales_4_ASV2507	Absence	Presence
1048	Unclassified_Actinomarinales_13_ASV2502	Unclassified_Actinomarinales_13_ASV2502	Absence	Presence
1049	Aeromicrobium_ASV101	Aeromicrobium_ASV101	Absence	Presence
1050	Aeromicrobium_ASV102	Aeromicrobium_ASV102	Absence	Presence
1051	Nocardioides_ASV1498	Nocardioides_ASV1498	Absence	Presence
1052	Unclassified_Frankiales_2_ASV3457	Unclassified_Frankiales_2_ASV3457	Absence	Presence
1053	Nakamurella_ASV1460	Nakamurella_ASV1460	Absence	Presence
1054	Unclassified_Pseudonocardiaceae_9_ASV4266	Unclassified_Pseudonocardiaceae_9_ASV4266	Absence	Presence
1055	Unclassified_Pseudonocardiaceae_6_ASV4263	Unclassified_Pseudonocardiaceae_6_ASV4263	Absence	Presence
1056	Actinomycetospora_ASV85	Actinomycetospora_ASV85	Absence	Presence
1057	Corynebacterium_ASV649	Corynebacterium_ASV649	Absence	Presence
1058	Rhodococcus_ASV1832	Rhodococcus_ASV1832	Absence	Presence
1059	Rhodococcus_ASV1838	Rhodococcus_ASV1838	Absence	Presence
1060	Corynebacterium_ASV664	Corynebacterium_ASV664	Absence	Presence
1061	Corynebacterium_ASV676	Corynebacterium_ASV676	Absence	Presence
1062	Corynebacterium_ASV660	Corynebacterium_ASV660	Absence	Presence
1063	Corynebacterium_ASV653	Corynebacterium_ASV653	Absence	Presence
1064	Corynebacterium_ASV670	Corynebacterium_ASV670	Absence	Presence
1065	Corynebacterium_ASV651	Corynebacterium_ASV651	Absence	Presence
1066	Corynebacterium_ASV674	Corynebacterium_ASV674	Absence	Presence
1067	Unclassified_Nocardiaceae_1_ASV3976	Unclassified_Nocardiaceae_1_ASV3976	Absence	Presence
1068	Mycobacterium_ASV1416	Mycobacterium_ASV1416	Absence	Presence
1069	Mycobacterium_ASV1431	Mycobacterium_ASV1431	Absence	Presence
1070	Mycobacterium_ASV1430	Mycobacterium_ASV1430	Absence	Presence
1071	Mycobacterium_ASV1420	Mycobacterium_ASV1420	Absence	Presence
1072	Unclassified_Frankiales_4_ASV3459	Unclassified_Frankiales_4_ASV3459	Absence	Presence
1073	Blastococcus_ASV335	Blastococcus_ASV335	Absence	Presence
1074	Unclassified_Micromonosporaceae_3_ASV3870	Unclassified_Micromonosporaceae_3_ASV3870	Absence	Presence
1075	Leucobacter_ASV1248	Leucobacter_ASV1248	Absence	Presence
1076	Unclassified_Microbacteriaceae_4_ASV3849	Unclassified_Microbacteriaceae_4_ASV3849	Absence	Presence
1077	Unclassified_Microbacteriaceae_8_ASV3853	Unclassified_Microbacteriaceae_8_ASV3853	Absence	Presence
1078	Curtobacterium_ASV691	Curtobacterium_ASV691	Absence	Presence
1079	Leucobacter_ASV1250	Leucobacter_ASV1250	Absence	Presence
1080	Leucobacter_ASV1249	Leucobacter_ASV1249	Absence	Presence
1081	Flaviflexus_ASV931	Flaviflexus_ASV931	Absence	Presence
1082	Unclassified_Micrococcales_2_ASV3862	Unclassified_Micrococcales_2_ASV3862	Absence	Presence
1083	Unclassified_Promicromonosporaceae_2_ASV4244	Unclassified_Promicromonosporaceae_2_ASV4244	Absence	Presence
1084	Unclassified_Promicromonosporaceae_1_ASV4243	Unclassified_Promicromonosporaceae_1_ASV4243	Absence	Presence
1085	Unclassified_Intrasporangiaceae_1_ASV3642	Unclassified_Intrasporangiaceae_1_ASV3642	Absence	Presence
1086	Brachybacterium_ASV349	Brachybacterium_ASV349	Absence	Presence
1087	Ornithinimicrobium_ASV1553	Ornithinimicrobium_ASV1553	Absence	Presence
1088	Kocuria_ASV1144	Kocuria_ASV1144	Absence	Presence
1089	Unclassified_Micrococcaceae_2_ASV3856	Unclassified_Micrococcaceae_2_ASV3856	Absence	Presence
1090	Micrococcus_ASV1394	Micrococcus_ASV1394	Absence	Presence
1091	Kocuria_ASV1139	Kocuria_ASV1139	Absence	Presence
1092	Brevibacterium_ASV359	Brevibacterium_ASV359	Absence	Presence
1093	Brevibacterium_ASV360	Brevibacterium_ASV360	Absence	Presence
1094	Brevibacterium_ASV358	Brevibacterium_ASV358	Absence	Presence
1095	Unclassified_Bogoriellaceae_1_ASV2919	Unclassified_Bogoriellaceae_1_ASV2919	Absence	Presence
1096	Unclassified_Nitriliruptoraceae_ASV1475	Unclassified_Nitriliruptoraceae_ASV1475	Absence	Presence
1097	Unclassified_WS1_ASV5106	Unclassified_WS1_ASV5106	Absence	Presence
1098	Raoultibacter_ASV1800	Raoultibacter_ASV1800	Absence	Presence
1099	Unclassified_Coriobacteriales_Incertae_Sedis_1_ASV3137	Unclassified_Coriobacteriales_Incertae_Sedis_1_ASV3137	Absence	Presence
1100	Unclassidied_67-14_3_ASV2413	Unclassidied_67-14_3_ASV2413	Absence	Presence
1101	Rubrobacter_ASV1947	Rubrobacter_ASV1947	Absence	Presence
1102	Unclassified_Gemmatimonadaceae_11_ASV3573	Unclassified_Gemmatimonadaceae_11_ASV3573	Absence	Presence
1103	Unclassified_Gemmatimonadaceae_4_ASV3576	Unclassified_Gemmatimonadaceae_4_ASV3576	Absence	Presence
1104	YC-ZSS-LKJ147_ASV5113	YC-ZSS-LKJ147_ASV5113	Absence	Presence
1105	Unclassified_Longimicrobiaceae_1_ASV3787	Unclassified_Longimicrobiaceae_1_ASV3787	Absence	Presence
1106	Unclassified_Longimicrobiaceae_1_ASV3786	Unclassified_Longimicrobiaceae_1_ASV3786	Absence	Presence
1107	Unclassified_BD2-11_terrestrial_group_3_ASV2861	Unclassified_BD2-11_terrestrial_group_3_ASV2861	Absence	Presence
1108	Unclassified_BD2-11_terrestrial_group_9_ASV2870	Unclassified_BD2-11_terrestrial_group_9_ASV2870	Absence	Presence
1109	Unclassified_BD2-11_terrestrial_group_2_ASV2850	Unclassified_BD2-11_terrestrial_group_2_ASV2850	Absence	Presence
1110	Unclassified_BD2-11_terrestrial_group_29_ASV2860	Unclassified_BD2-11_terrestrial_group_29_ASV2860	Absence	Presence
1111	Unclassified_BD2-11_terrestrial_group_12_ASV2842	Unclassified_BD2-11_terrestrial_group_12_ASV2842	Absence	Presence
1112	Unclassified_BD2-11_terrestrial_group_1_ASV2839	Unclassified_BD2-11_terrestrial_group_1_ASV2839	Absence	Presence
1113	Unclassified_BD2-11_terrestrial_group_32_ASV2864	Unclassified_BD2-11_terrestrial_group_32_ASV2864	Absence	Presence
1114	Unclassified_BD2-11_terrestrial_group_8_ASV2869	Unclassified_BD2-11_terrestrial_group_8_ASV2869	Absence	Presence
1115	Unclassified_BD2-11_terrestrial_group_27_ASV2858	Unclassified_BD2-11_terrestrial_group_27_ASV2858	Absence	Presence
1116	Unclassified_BD2-11_terrestrial_group_22_ASV2853	Unclassified_BD2-11_terrestrial_group_22_ASV2853	Absence	Presence
1117	Unclassified_BD2-11_terrestrial_group_20_ASV2851	Unclassified_BD2-11_terrestrial_group_20_ASV2851	Absence	Presence
1118	Unclassified_BD2-11_terrestrial_group_21_ASV2852	Unclassified_BD2-11_terrestrial_group_21_ASV2852	Absence	Presence
1119	Unclassified_BD2-11_terrestrial_group_24_ASV2855	Unclassified_BD2-11_terrestrial_group_24_ASV2855	Absence	Presence
1120	Unclassified_BD2-11_terrestrial_group_15_ASV2845	Unclassified_BD2-11_terrestrial_group_15_ASV2845	Absence	Presence
1121	Unclassified_BD2-11_terrestrial_group_18_ASV2848	Unclassified_BD2-11_terrestrial_group_18_ASV2848	Absence	Presence
1122	Unclassified_BD2-11_terrestrial_group_19_ASV2849	Unclassified_BD2-11_terrestrial_group_19_ASV2849	Absence	Presence
1123	Unclassified_BD2-11_terrestrial_group_11_ASV2841	Unclassified_BD2-11_terrestrial_group_11_ASV2841	Absence	Presence
1124	Unclassified_BD2-11_terrestrial_group_17_ASV2847	Unclassified_BD2-11_terrestrial_group_17_ASV2847	Absence	Presence
1125	Unclassified_BD2-11_terrestrial_group_6_ASV2867	Unclassified_BD2-11_terrestrial_group_6_ASV2867	Absence	Presence
1126	Unclassified_BD2-11_terrestrial_group_5_ASV2866	Unclassified_BD2-11_terrestrial_group_5_ASV2866	Absence	Presence
1127	Unclassified_BD2-11_terrestrial_group_10_ASV2840	Unclassified_BD2-11_terrestrial_group_10_ASV2840	Absence	Presence
1128	Unclassified_BD2-11_terrestrial_group_30_ASV2862	Unclassified_BD2-11_terrestrial_group_30_ASV2862	Absence	Presence
1129	Unclassified_BD2-11_terrestrial_group_28_ASV2859	Unclassified_BD2-11_terrestrial_group_28_ASV2859	Absence	Presence
1130	Unclassified_PAUC43f_marine_benthic_group_7_ASV4068	Unclassified_PAUC43f_marine_benthic_group_7_ASV4068	Absence	Presence
1131	Unclassified_PAUC43f_marine_benthic_group_12_ASV4058	Unclassified_PAUC43f_marine_benthic_group_12_ASV4058	Absence	Presence
1132	Unclassified_PAUC43f_marine_benthic_group_10_ASV4056	Unclassified_PAUC43f_marine_benthic_group_10_ASV4056	Absence	Presence
1133	Unclassified_PAUC43f_marine_benthic_group_6_ASV4067	Unclassified_PAUC43f_marine_benthic_group_6_ASV4067	Absence	Presence
1134	Unclassified_PAUC43f_marine_benthic_group_9_ASV4070	Unclassified_PAUC43f_marine_benthic_group_9_ASV4070	Absence	Presence
1135	Unclassified_PAUC43f_marine_benthic_group_5_ASV4066	Unclassified_PAUC43f_marine_benthic_group_5_ASV4066	Absence	Presence
1136	Unclassified_PAUC43f_marine_benthic_group_16_ASV4062	Unclassified_PAUC43f_marine_benthic_group_16_ASV4062	Absence	Presence
1137	Unclassified_PAUC43f_marine_benthic_group_11_ASV4057	Unclassified_PAUC43f_marine_benthic_group_11_ASV4057	Absence	Presence
1138	Unclassified_PAUC43f_marine_benthic_group_2_ASV4063	Unclassified_PAUC43f_marine_benthic_group_2_ASV4063	Absence	Presence
1139	Unclassified_PAUC43f_marine_benthic_group_15_ASV4061	Unclassified_PAUC43f_marine_benthic_group_15_ASV4061	Absence	Presence
1140	Unclassified_PAUC43f_marine_benthic_group_13_ASV4059	Unclassified_PAUC43f_marine_benthic_group_13_ASV4059	Absence	Presence
1141	Unclassified_PAUC43f_marine_benthic_group_1_ASV4055	Unclassified_PAUC43f_marine_benthic_group_1_ASV4055	Absence	Presence
1142	Unclassified_PAUC43f_marine_benthic_group_8_ASV4069	Unclassified_PAUC43f_marine_benthic_group_8_ASV4069	Absence	Presence
1143	Unclassified_PAUC43f_marine_benthic_group_14_ASV4060	Unclassified_PAUC43f_marine_benthic_group_14_ASV4060	Absence	Presence
1144	Unclassified_Moduliflexaceae_3_ASV3896	Unclassified_Moduliflexaceae_3_ASV3896	Absence	Presence
1145	Unclassified_Moduliflexaceae_1_ASV3894	Unclassified_Moduliflexaceae_1_ASV3894	Absence	Presence
1146	Unclassified_Moduliflexaceae_4_ASV3897	Unclassified_Moduliflexaceae_4_ASV3897	Absence	Presence
1147	Unclassified_Moduliflexaceae_5_ASV3898	Unclassified_Moduliflexaceae_5_ASV3898	Absence	Presence
1148	Unclassified_Moduliflexaceae_2_ASV3895	Unclassified_Moduliflexaceae_2_ASV3895	Absence	Presence
1149	Unclassified_Moduliflexaceae_6_ASV3899	Unclassified_Moduliflexaceae_6_ASV3899	Absence	Presence
1150	Unclassified_Gemmatimonadaceae_3_ASV3575	Unclassified_Gemmatimonadaceae_3_ASV3575	Absence	Presence
1151	Unclassified_Gemmatimonadaceae_6_ASV3578	Unclassified_Gemmatimonadaceae_6_ASV3578	Absence	Presence
1152	Unclassified_Latescibacterota_3_ASV3738	Unclassified_Latescibacterota_3_ASV3738	Absence	Presence
1153	Desulfatiglans_ASV751	Desulfatiglans_ASV751	Absence	Presence
1154	Unclassified_Calditrichaceae_9_ASV2983	Unclassified_Calditrichaceae_9_ASV2983	Absence	Presence
1155	Unclassified_Clostridia_1_ASV3079	Unclassified_Clostridia_1_ASV3079	Absence	Presence
1156	Unclassified_Calditrichaceae_4_ASV2973	Unclassified_Calditrichaceae_4_ASV2973	Absence	Presence
1157	Calorithrix_ASV399	Calorithrix_ASV399	Absence	Presence
1158	Calorithrix_ASV394	Calorithrix_ASV394	Absence	Presence
1159	Calorithrix_ASV397	Calorithrix_ASV397	Absence	Presence
1160	Calorithrix_ASV395	Calorithrix_ASV395	Absence	Presence
1161	Calorithrix_ASV398	Calorithrix_ASV398	Absence	Presence
1162	Unclassified_Calditrichaceae_7_ASV2979	Unclassified_Calditrichaceae_7_ASV2979	Absence	Presence
1163	Unclassified_Calditrichaceae_6_ASV2977	Unclassified_Calditrichaceae_6_ASV2977	Absence	Presence
1164	Unclassified_Calditrichaceae_2_ASV2969	Unclassified_Calditrichaceae_2_ASV2969	Absence	Presence
1165	Caldithrix_ASV388	Caldithrix_ASV388	Absence	Presence
1166	Caldithrix_ASV392	Caldithrix_ASV392	Absence	Presence
1167	Caldithrix_ASV393	Caldithrix_ASV393	Absence	Presence
1168	Caldithrix_ASV391	Caldithrix_ASV391	Absence	Presence
1169	Caldithrix_ASV386	Caldithrix_ASV386	Absence	Presence
1170	Unclassified_Calditrichaceae_5_ASV2975	Unclassified_Calditrichaceae_5_ASV2975	Absence	Presence
1171	Unclassified_Calditrichaceae_1_ASV2966	Unclassified_Calditrichaceae_1_ASV2966	Absence	Presence
1172	Unclassified_Calditrichaceae_1_ASV2965	Unclassified_Calditrichaceae_1_ASV2965	Absence	Presence
1173	Unclassified_Calditrichaceae_2_ASV2968	Unclassified_Calditrichaceae_2_ASV2968	Absence	Presence
1174	Unclassified_Calditrichaceae_10_ASV2967	Unclassified_Calditrichaceae_10_ASV2967	Absence	Presence
1175	Unclassified_bacteriap25_3_ASV2703	Unclassified_bacteriap25_3_ASV2703	Absence	Presence
1176	Unclassified_Desulfobacterota_2_ASV3242	Unclassified_Desulfobacterota_2_ASV3242	Absence	Presence
1177	Unclassified_Sva0485_8_ASV4832	Unclassified_Sva0485_8_ASV4832	Absence	Presence
1178	Unclassified_Desulfovibrionaceae_2_ASV3283	Unclassified_Desulfovibrionaceae_2_ASV3283	Absence	Presence
1179	MSBL7_ASV1413	MSBL7_ASV1413	Absence	Presence
1180	Desulfocapsa_ASV774	Desulfocapsa_ASV774	Absence	Presence
1181	Desulfopila_ASV792	Desulfopila_ASV792	Absence	Presence
1182	Unclassified_Desulfocapsaceae_6_ASV3255	Unclassified_Desulfocapsaceae_6_ASV3255	Absence	Presence
1183	Unclassified_Desulfocapsaceae_7_ASV3256	Unclassified_Desulfocapsaceae_7_ASV3256	Absence	Presence
1184	Desulfatiglans_ASV750	Desulfatiglans_ASV750	Absence	Presence
1185	Desulfatiglans_ASV755	Desulfatiglans_ASV755	Absence	Presence
1186	Desulfatiglans_ASV762	Desulfatiglans_ASV762	Absence	Presence
1187	Desulfatiglans_ASV740	Desulfatiglans_ASV740	Absence	Presence
1188	Desulfatiglans_ASV748	Desulfatiglans_ASV748	Absence	Presence
1189	Desulfatiglans_ASV736	Desulfatiglans_ASV736	Absence	Presence
1190	Desulfatiglans_ASV764	Desulfatiglans_ASV764	Absence	Presence
1191	Desulfatiglans_ASV761	Desulfatiglans_ASV761	Absence	Presence
1192	Desulfatiglans_ASV757	Desulfatiglans_ASV757	Absence	Presence
1193	Desulfatiglans_ASV759	Desulfatiglans_ASV759	Absence	Presence
1194	Desulfatiglans_ASV753	Desulfatiglans_ASV753	Absence	Presence
1195	Desulfatiglans_ASV756	Desulfatiglans_ASV756	Absence	Presence
1196	Desulfatiglans_ASV742	Desulfatiglans_ASV742	Absence	Presence
1197	Desulfatiglans_ASV738	Desulfatiglans_ASV738	Absence	Presence
1198	Desulfatiglans_ASV741	Desulfatiglans_ASV741	Absence	Presence
1199	Desulfatiglans_ASV765	Desulfatiglans_ASV765	Absence	Presence
1200	Candidatus_Paracaedibacter_ASV462	Candidatus_Paracaedibacter_ASV462	Absence	Presence
1201	Desulfatiglans_ASV737	Desulfatiglans_ASV737	Absence	Presence
1202	Desulfatiglans_ASV763	Desulfatiglans_ASV763	Absence	Presence
1203	Desulfatiglans_ASV760	Desulfatiglans_ASV760	Absence	Presence
1204	Unclassified_PS-B29_2_ASV4246	Unclassified_PS-B29_2_ASV4246	Absence	Presence
1205	Unclassified_Syntrophobacterales_1_ASV4842	Unclassified_Syntrophobacterales_1_ASV4842	Absence	Presence
1206	Unclassified_0319-6G20_6_ASV2424	Unclassified_0319-6G20_6_ASV2424	Absence	Presence
1207	P3OB-42_ASV1564	P3OB-42_ASV1564	Absence	Presence
1208	P3OB-42_ASV1571	P3OB-42_ASV1571	Absence	Presence
1209	Unclassified_Sva0485_5_ASV4829	Unclassified_Sva0485_5_ASV4829	Absence	Presence
1210	Unclassified_Syntrophobacteraceae_1_ASV4838	Unclassified_Syntrophobacteraceae_1_ASV4838	Absence	Presence
1211	Unclassified_Syntrophobacteraceae_3_ASV4840	Unclassified_Syntrophobacteraceae_3_ASV4840	Absence	Presence
1212	Unclassified_Syntrophobacteraceae_4_ASV4841	Unclassified_Syntrophobacteraceae_4_ASV4841	Absence	Presence
1213	Unclassified_Desulfobacterota_5_ASV3245	Unclassified_Desulfobacterota_5_ASV3245	Absence	Presence
1214	Unclassified_MBNT15_3_ASV3824	Unclassified_MBNT15_3_ASV3824	Absence	Presence
1215	Unclassified_MBNT15_2_ASV3823	Unclassified_MBNT15_2_ASV3823	Absence	Presence
1216	Unclassified_Desulfobacterota_1_ASV3237	Unclassified_Desulfobacterota_1_ASV3237	Absence	Presence
1217	P3OB-42_ASV1563	P3OB-42_ASV1563	Absence	Presence
1218	Sandaracinus_ASV2035	Sandaracinus_ASV2035	Absence	Presence
1219	Unclassified_Sandaracinaceae_11_ASV4514	Unclassified_Sandaracinaceae_11_ASV4514	Absence	Presence
1220	Sandaracinus_ASV2036	Sandaracinus_ASV2036	Absence	Presence
1221	Unclassified_Sandaracinaceae_13_ASV4516	Unclassified_Sandaracinaceae_13_ASV4516	Absence	Presence
1222	Unclassified_Sandaracinaceae_6_ASV4522	Unclassified_Sandaracinaceae_6_ASV4522	Absence	Presence
1223	Unclassified_Sandaracinaceae_12_ASV4515	Unclassified_Sandaracinaceae_12_ASV4515	Absence	Presence
1224	Unclassified_Sandaracinaceae_1_ASV4512	Unclassified_Sandaracinaceae_1_ASV4512	Absence	Presence
1225	Unclassified_Myxococcota_1_ASV3918	Unclassified_Myxococcota_1_ASV3918	Absence	Presence
1226	Unclassified_NB1-j_21_ASV3936	Unclassified_NB1-j_21_ASV3936	Absence	Presence
1227	Unclassified_NB1-j_18_ASV3932	Unclassified_NB1-j_18_ASV3932	Absence	Presence
1228	Unclassified_NB1-j_10_ASV3924	Unclassified_NB1-j_10_ASV3924	Absence	Presence
1229	Unclassified_NB1-j_6_ASV3941	Unclassified_NB1-j_6_ASV3941	Absence	Presence
1230	Unclassified_NB1-j_16_ASV3930	Unclassified_NB1-j_16_ASV3930	Absence	Presence
1231	Unclassified_NB1-j_8_ASV3943	Unclassified_NB1-j_8_ASV3943	Absence	Presence
1232	Unclassified_NB1-j_20_ASV3935	Unclassified_NB1-j_20_ASV3935	Absence	Presence
1233	Unclassified_NB1-j_14_ASV3928	Unclassified_NB1-j_14_ASV3928	Absence	Presence
1234	Unclassified_NB1-j_17_ASV3931	Unclassified_NB1-j_17_ASV3931	Absence	Presence
1235	Unclassified_NB1-j_3_ASV3938	Unclassified_NB1-j_3_ASV3938	Absence	Presence
1236	Unclassified_NB1-j_1_ASV3923	Unclassified_NB1-j_1_ASV3923	Absence	Presence
1237	Unclassified_NB1-j_7_ASV3942	Unclassified_NB1-j_7_ASV3942	Absence	Presence
1238	Unclassified_NB1-j_2_ASV3934	Unclassified_NB1-j_2_ASV3934	Absence	Presence
1239	Unclassified_NB1-j_22_ASV3937	Unclassified_NB1-j_22_ASV3937	Absence	Presence
1240	Unclassified_BIrii41_4_ASV2908	Unclassified_BIrii41_4_ASV2908	Absence	Presence
1241	Unclassified_BIrii41_1_ASV2905	Unclassified_BIrii41_1_ASV2905	Absence	Presence
1242	Unclassified_BIrii41_6_ASV2910	Unclassified_BIrii41_6_ASV2910	Absence	Presence
1243	Pajaroellobacter_ASV1580	Pajaroellobacter_ASV1580	Absence	Presence
1244	Phaselicystis_ASV1651	Phaselicystis_ASV1651	Absence	Presence
1245	Unclassified_BIrii41_5_ASV2909	Unclassified_BIrii41_5_ASV2909	Absence	Presence
1246	Unclassified_Polyangiales_1_ASV4230	Unclassified_Polyangiales_1_ASV4230	Absence	Presence
1247	Unclassified_NB1-j_5_ASV3940	Unclassified_NB1-j_5_ASV3940	Absence	Presence
1248	Unclassified_0319-6G20_2_ASV2420	Unclassified_0319-6G20_2_ASV2420	Absence	Presence
1249	Unclassified_0319-6G20_7_ASV2425	Unclassified_0319-6G20_7_ASV2425	Absence	Presence
1250	Unclassified_MidBa8_1_ASV3883	Unclassified_MidBa8_1_ASV3883	Absence	Presence
1251	Unclassified_MidBa8_2_ASV3884	Unclassified_MidBa8_2_ASV3884	Absence	Presence
1252	Desulfomonile_ASV787	Desulfomonile_ASV787	Absence	Presence
1253	Oceanicaulis_ASV1527	Oceanicaulis_ASV1527	Absence	Presence
1254	Reyranella_ASV1812	Reyranella_ASV1812	Absence	Presence
1255	SWB02_ASV2308	SWB02_ASV2308	Absence	Presence
1256	SWB02_ASV2306	SWB02_ASV2306	Absence	Presence
1257	SWB02_ASV2304	SWB02_ASV2304	Absence	Presence
1258	Unclassified_Hyphomonadaceae_6_ASV3634	Unclassified_Hyphomonadaceae_6_ASV3634	Absence	Presence
1259	Unclassified_Hyphomonadaceae_5_ASV3633	Unclassified_Hyphomonadaceae_5_ASV3633	Absence	Presence
1260	Unclassified_Alphaproteobacteria_14_ASV2546	Unclassified_Alphaproteobacteria_14_ASV2546	Absence	Presence
1261	Defluviicoccus_ASV726	Defluviicoccus_ASV726	Absence	Presence
1262	Unclassified_Rhodobacteraceae_89_ASV4435	Unclassified_Rhodobacteraceae_89_ASV4435	Absence	Presence
1263	Unclassified_Defluviicoccales_3_ASV3222	Unclassified_Defluviicoccales_3_ASV3222	Absence	Presence
1264	Hirschia_ASV1092	Hirschia_ASV1092	Absence	Presence
1265	Unclassified_Rhodobacteraceae_16_ASV4355	Unclassified_Rhodobacteraceae_16_ASV4355	Absence	Presence
1266	Unclassified_AT-s3-44_2_ASV2660	Unclassified_AT-s3-44_2_ASV2660	Absence	Presence
1267	Unclassified_Sphingomonadaceae_3_ASV4754	Unclassified_Sphingomonadaceae_3_ASV4754	Absence	Presence
1268	Unclassified_AT-s3-44_1_ASV2659	Unclassified_AT-s3-44_1_ASV2659	Absence	Presence
1269	Unclassified_Alphaproteobacteria_4_ASV2572	Unclassified_Alphaproteobacteria_4_ASV2572	Absence	Presence
1270	Unclassified_Alphaproteobacteria_15_ASV2547	Unclassified_Alphaproteobacteria_15_ASV2547	Absence	Presence
1271	Unclassified_Defluviicoccales_6_ASV3225	Unclassified_Defluviicoccales_6_ASV3225	Absence	Presence
1272	Unclassified_Defluviicoccales_2_ASV3221	Unclassified_Defluviicoccales_2_ASV3221	Absence	Presence
1273	Unclassified_Rhodobacteraceae_102_ASV4349	Unclassified_Rhodobacteraceae_102_ASV4349	Absence	Presence
1274	Unclassified_Rhodobacteraceae_99_ASV4446	Unclassified_Rhodobacteraceae_99_ASV4446	Absence	Presence
1275	Unclassified_Rhodobacteraceae_101_ASV4348	Unclassified_Rhodobacteraceae_101_ASV4348	Absence	Presence
1276	Unclassified_Rhodobacteraceae_96_ASV4443	Unclassified_Rhodobacteraceae_96_ASV4443	Absence	Presence
1277	Limibaculum_ASV1265	Limibaculum_ASV1265	Absence	Presence
1278	Rubribacterium_ASV1936	Rubribacterium_ASV1936	Absence	Presence
1279	Candidatus_Alysiosphaera_ASV405	Candidatus_Alysiosphaera_ASV405	Absence	Presence
1280	Unclassified_Alphaproteobacteria_36_ASV2570	Unclassified_Alphaproteobacteria_36_ASV2570	Absence	Presence
1281	Unclassified_Alphaproteobacteria_29_ASV2562	Unclassified_Alphaproteobacteria_29_ASV2562	Absence	Presence
1282	Unclassified_Alphaproteobacteria_33_ASV2567	Unclassified_Alphaproteobacteria_33_ASV2567	Absence	Presence
1283	Unclassified_Alphaproteobacteria_25_ASV2558	Unclassified_Alphaproteobacteria_25_ASV2558	Absence	Presence
1284	Candidatus_Alysiosphaera_ASV407	Candidatus_Alysiosphaera_ASV407	Absence	Presence
1285	Candidatus_Alysiosphaera_ASV404	Candidatus_Alysiosphaera_ASV404	Absence	Presence
1286	Unclassified_Geminicoccaceae_2_ASV3550	Unclassified_Geminicoccaceae_2_ASV3550	Absence	Presence
1287	Unclassified_Geminicoccaceae_5_ASV3553	Unclassified_Geminicoccaceae_5_ASV3553	Absence	Presence
1288	Unclassified_Geminicoccaceae_1_ASV3549	Unclassified_Geminicoccaceae_1_ASV3549	Absence	Presence
1289	Unclassified_Geminicoccaceae_6_ASV3554	Unclassified_Geminicoccaceae_6_ASV3554	Absence	Presence
1290	Unclassified_Geminicoccaceae_3_ASV3551	Unclassified_Geminicoccaceae_3_ASV3551	Absence	Presence
1291	Sneathiella_ASV2101	Sneathiella_ASV2101	Absence	Presence
1292	Unclassified_Alphaproteobacteria_19_ASV2551	Unclassified_Alphaproteobacteria_19_ASV2551	Absence	Presence
1293	Sneathiella_ASV2102	Sneathiella_ASV2102	Absence	Presence
1294	Unclassified_Alphaproteobacteria_18_ASV2550	Unclassified_Alphaproteobacteria_18_ASV2550	Absence	Presence
1295	Unclassified_SM2D12_3_ASV4737	Unclassified_SM2D12_3_ASV4737	Absence	Presence
1296	Unclassified_Rhodospirillales_4_ASV4458	Unclassified_Rhodospirillales_4_ASV4458	Absence	Presence
1297	Unclassified_Bacteriovoracaceae_1_ASV2706	Unclassified_Bacteriovoracaceae_1_ASV2706	Absence	Presence
1298	Unclassified_Bacteriovoracaceae_2_ASV2707	Unclassified_Bacteriovoracaceae_2_ASV2707	Absence	Presence
1299	Peredibacter_ASV1630	Peredibacter_ASV1630	Absence	Presence
1300	Peredibacter_ASV1631	Peredibacter_ASV1631	Absence	Presence
1301	Unclassified_Bacteriovoracaceae_3_ASV2708	Unclassified_Bacteriovoracaceae_3_ASV2708	Absence	Presence
1302	Unclassified_Defluviicoccales_5_ASV3224	Unclassified_Defluviicoccales_5_ASV3224	Absence	Presence
1303	Unclassified_Alphaproteobacteria_12_ASV2544	Unclassified_Alphaproteobacteria_12_ASV2544	Absence	Presence
1304	Unclassified_Thalassobaculales_3_ASV4851	Unclassified_Thalassobaculales_3_ASV4851	Absence	Presence
1305	Unclassified_Zavarziniales_1_ASV4972	Unclassified_Zavarziniales_1_ASV4972	Absence	Presence
1306	Unclassified_Alphaproteobacteria_1_ASV2541	Unclassified_Alphaproteobacteria_1_ASV2541	Absence	Presence
1307	Unclassified_Alphaproteobacteria_20_ASV2553	Unclassified_Alphaproteobacteria_20_ASV2553	Absence	Presence
1308	Bartonella_ASV277	Bartonella_ASV277	Absence	Presence
1309	Bartonella_ASV281	Bartonella_ASV281	Absence	Presence
1310	Unclassified_Rhizobiaceae_1_ASV4293	Unclassified_Rhizobiaceae_1_ASV4293	Absence	Presence
1311	Unclassified_Hyphomonadaceae_7_ASV3635	Unclassified_Hyphomonadaceae_7_ASV3635	Absence	Presence
1312	Unclassified_D05-2_3_ASV3217	Unclassified_D05-2_3_ASV3217	Absence	Presence
1313	Allorhizobium-Neorhizobium-Pararhizobium-Rhizobium_ASV153	Allorhizobium-Neorhizobium-Pararhizobium-Rhizobium_ASV153	Absence	Presence
1314	Unclassified_Rhizobiaceae_6_ASV4318	Unclassified_Rhizobiaceae_6_ASV4318	Absence	Presence
1315	Ochrobactrum_ASV1538	Ochrobactrum_ASV1538	Absence	Presence
1316	Ochrobactrum_ASV1540	Ochrobactrum_ASV1540	Absence	Presence
1317	Ochrobactrum_ASV1536	Ochrobactrum_ASV1536	Absence	Presence
1318	Allorhizobium-Neorhizobium-Pararhizobium-Rhizobium_ASV151	Allorhizobium-Neorhizobium-Pararhizobium-Rhizobium_ASV151	Absence	Presence
1319	Pseudochrobactrum_ASV1742	Pseudochrobactrum_ASV1742	Absence	Presence
1320	Unclassified_Rhizobiaceae_19_ASV4303	Unclassified_Rhizobiaceae_19_ASV4303	Absence	Presence
1321	Aureimonas_ASV236	Aureimonas_ASV236	Absence	Presence
1322	Aureimonas_ASV238	Aureimonas_ASV238	Absence	Presence
1323	Allorhizobium-Neorhizobium-Pararhizobium-Rhizobium_ASV142	Allorhizobium-Neorhizobium-Pararhizobium-Rhizobium_ASV142	Absence	Presence
1324	Allorhizobium-Neorhizobium-Pararhizobium-Rhizobium_ASV150	Allorhizobium-Neorhizobium-Pararhizobium-Rhizobium_ASV150	Absence	Presence
1325	Allorhizobium-Neorhizobium-Pararhizobium-Rhizobium_ASV149	Allorhizobium-Neorhizobium-Pararhizobium-Rhizobium_ASV149	Absence	Presence
1326	Unclassified_Rhizobiaceae_15_ASV4299	Unclassified_Rhizobiaceae_15_ASV4299	Absence	Presence
1327	Unclassified_Rhizobiaceae_3_ASV4315	Unclassified_Rhizobiaceae_3_ASV4315	Absence	Presence
1328	Unclassified_Rhizobiaceae_23_ASV4308	Unclassified_Rhizobiaceae_23_ASV4308	Absence	Presence
1329	Aureimonas_ASV241	Aureimonas_ASV241	Absence	Presence
1330	Allorhizobium-Neorhizobium-Pararhizobium-Rhizobium_ASV154	Allorhizobium-Neorhizobium-Pararhizobium-Rhizobium_ASV154	Absence	Presence
1331	Aureimonas_ASV245	Aureimonas_ASV245	Absence	Presence
1332	Aureimonas_ASV242	Aureimonas_ASV242	Absence	Presence
1333	Shinella_ASV2079	Shinella_ASV2079	Absence	Presence
1334	Allorhizobium-Neorhizobium-Pararhizobium-Rhizobium_ASV143	Allorhizobium-Neorhizobium-Pararhizobium-Rhizobium_ASV143	Absence	Presence
1335	Allorhizobium-Neorhizobium-Pararhizobium-Rhizobium_ASV157	Allorhizobium-Neorhizobium-Pararhizobium-Rhizobium_ASV157	Absence	Presence
1336	Allorhizobium-Neorhizobium-Pararhizobium-Rhizobium_ASV147	Allorhizobium-Neorhizobium-Pararhizobium-Rhizobium_ASV147	Absence	Presence
1337	Bartonella_ASV279	Bartonella_ASV279	Absence	Presence
1338	Bartonella_ASV288	Bartonella_ASV288	Absence	Presence
1339	Unclassified_Rhizobiaceae_27_ASV4312	Unclassified_Rhizobiaceae_27_ASV4312	Absence	Presence
1340	Unclassified_Rhizobiales_10_ASV4323	Unclassified_Rhizobiales_10_ASV4323	Absence	Presence
1341	Unclassified_Rhodobacteraceae_57_ASV4400	Unclassified_Rhodobacteraceae_57_ASV4400	Absence	Presence
1342	Unclassified_Hyphomonadaceae_2_ASV3630	Unclassified_Hyphomonadaceae_2_ASV3630	Absence	Presence
1343	Hyphomonas_ASV1119	Hyphomonas_ASV1119	Absence	Presence
1344	Unclassified_Rhodobacteraceae_75_ASV4420	Unclassified_Rhodobacteraceae_75_ASV4420	Absence	Presence
1345	Unclassified_Rhodobacteraceae_25_ASV4365	Unclassified_Rhodobacteraceae_25_ASV4365	Absence	Presence
1346	Oceanicaulis_ASV1528	Oceanicaulis_ASV1528	Absence	Presence
1347	Methyloceanibacter_ASV1375	Methyloceanibacter_ASV1375	Absence	Presence
1348	Methyloceanibacter_ASV1374	Methyloceanibacter_ASV1374	Absence	Presence
1349	Brevundimonas_ASV368	Brevundimonas_ASV368	Absence	Presence
1350	Brevundimonas_ASV370	Brevundimonas_ASV370	Absence	Presence
1351	Brevundimonas_ASV367	Brevundimonas_ASV367	Absence	Presence
1352	Bosea_ASV345	Bosea_ASV345	Absence	Presence
1353	Bosea_ASV344	Bosea_ASV344	Absence	Presence
1354	Methylobacterium-Methylorubrum_ASV1361	Methylobacterium-Methylorubrum_ASV1361	Absence	Presence
1355	Methylobacterium-Methylorubrum_ASV1357	Methylobacterium-Methylorubrum_ASV1357	Absence	Presence
1356	Methylobacterium-Methylorubrum_ASV1363	Methylobacterium-Methylorubrum_ASV1363	Absence	Presence
1357	Methylobacterium-Methylorubrum_ASV1367	Methylobacterium-Methylorubrum_ASV1367	Absence	Presence
1358	Bosea_ASV346	Bosea_ASV346	Absence	Presence
1359	Phreatobacter_ASV1674	Phreatobacter_ASV1674	Absence	Presence
1360	Unclassified_Beijerinckiaceae_19_ASV2887	Unclassified_Beijerinckiaceae_19_ASV2887	Absence	Presence
1361	Unclassified_Beijerinckiaceae_14_ASV2882	Unclassified_Beijerinckiaceae_14_ASV2882	Absence	Presence
1362	Unclassified_Beijerinckiaceae_10_ASV2878	Unclassified_Beijerinckiaceae_10_ASV2878	Absence	Presence
1363	Unclassified_Beijerinckiaceae_24_ASV2893	Unclassified_Beijerinckiaceae_24_ASV2893	Absence	Presence
1364	Methylobacterium-Methylorubrum_ASV1368	Methylobacterium-Methylorubrum_ASV1368	Absence	Presence
1365	Microvirga_ASV1399	Microvirga_ASV1399	Absence	Presence
1366	Unclassified_Beijerinckiaceae_15_ASV2883	Unclassified_Beijerinckiaceae_15_ASV2883	Absence	Presence
1367	Phreatobacter_ASV1673	Phreatobacter_ASV1673	Absence	Presence
1368	Unclassified_Xanthobacteraceae_1_ASV4950	Unclassified_Xanthobacteraceae_1_ASV4950	Absence	Presence
1369	Unclassified_Xanthobacteraceae_4_ASV4956	Unclassified_Xanthobacteraceae_4_ASV4956	Absence	Presence
1370	Unclassified_Xanthobacteraceae_12_ASV4953	Unclassified_Xanthobacteraceae_12_ASV4953	Absence	Presence
1371	Unclassified_Xanthobacteraceae_10_ASV4951	Unclassified_Xanthobacteraceae_10_ASV4951	Absence	Presence
1372	Unclassified_D05-2_1_ASV3215	Unclassified_D05-2_1_ASV3215	Absence	Presence
1373	Aureimonas_ASV243	Aureimonas_ASV243	Absence	Presence
1374	Camelimonas_ASV401	Camelimonas_ASV401	Absence	Presence
1375	1174-901-12_ASV16	1174-901-12_ASV16	Absence	Presence
1376	1174-901-12_ASV18	1174-901-12_ASV18	Absence	Presence
1377	1174-901-12_ASV15	1174-901-12_ASV15	Absence	Presence
1378	1174-901-12_ASV19	1174-901-12_ASV19	Absence	Presence
1379	1174-901-12_ASV17	1174-901-12_ASV17	Absence	Presence
1380	Rhodomicrobium_ASV1847	Rhodomicrobium_ASV1847	Absence	Presence
1381	Rhodomicrobium_ASV1848	Rhodomicrobium_ASV1848	Absence	Presence
1382	Rhodomicrobium_ASV1849	Rhodomicrobium_ASV1849	Absence	Presence
1383	Rhodomicrobium_ASV1850	Rhodomicrobium_ASV1850	Absence	Presence
1384	Rhodomicrobium_ASV1846	Rhodomicrobium_ASV1846	Absence	Presence
1385	Rhodomicrobium_ASV1842	Rhodomicrobium_ASV1842	Absence	Presence
1386	Pseudaminobacter_ASV1737	Pseudaminobacter_ASV1737	Absence	Presence
1387	Unclassified_Devosiaceae_2_ASV3301	Unclassified_Devosiaceae_2_ASV3301	Absence	Presence
1388	Devosia_ASV831	Devosia_ASV831	Absence	Presence
1389	Devosia_ASV828	Devosia_ASV828	Absence	Presence
1390	Blastochloris_ASV327	Blastochloris_ASV327	Absence	Presence
1391	Blastochloris_ASV332	Blastochloris_ASV332	Absence	Presence
1392	Blastochloris_ASV331	Blastochloris_ASV331	Absence	Presence
1393	Blastochloris_ASV326	Blastochloris_ASV326	Absence	Presence
1394	Devosia_ASV824	Devosia_ASV824	Absence	Presence
1395	Devosia_ASV832	Devosia_ASV832	Absence	Presence
1396	Devosia_ASV825	Devosia_ASV825	Absence	Presence
1397	Devosia_ASV829	Devosia_ASV829	Absence	Presence
1398	Devosia_ASV837	Devosia_ASV837	Absence	Presence
1399	Devosia_ASV827	Devosia_ASV827	Absence	Presence
1400	Devosia_ASV826	Devosia_ASV826	Absence	Presence
1401	Unclassified_Rhizobiales_Incertae_Sedis_2_ASV4333	Unclassified_Rhizobiales_Incertae_Sedis_2_ASV4333	Absence	Presence
1402	Mesorhizobium_ASV1355	Mesorhizobium_ASV1355	Absence	Presence
1403	Unclassified_Rhizobiaceae_14_ASV4298	Unclassified_Rhizobiaceae_14_ASV4298	Absence	Presence
1404	Unclassified_Rhizobiaceae_24_ASV4309	Unclassified_Rhizobiaceae_24_ASV4309	Absence	Presence
1405	Hyphomicrobium_ASV1109	Hyphomicrobium_ASV1109	Absence	Presence
1406	Hyphomicrobium_ASV1114	Hyphomicrobium_ASV1114	Absence	Presence
1407	Hyphomicrobium_ASV1115	Hyphomicrobium_ASV1115	Absence	Presence
1408	Unclassified_Beijerinckiaceae_1_ASV2877	Unclassified_Beijerinckiaceae_1_ASV2877	Absence	Presence
1409	Methylocystis_ASV1377	Methylocystis_ASV1377	Absence	Presence
1410	Unclassified_Stappiaceae_1_ASV4797	Unclassified_Stappiaceae_1_ASV4797	Absence	Presence
1411	Pseudovibrio_ASV1780	Pseudovibrio_ASV1780	Absence	Presence
1412	Hyphomicrobium_ASV1117	Hyphomicrobium_ASV1117	Absence	Presence
1413	Unclassified_Hyphomicrobiaceae_1_ASV3626	Unclassified_Hyphomicrobiaceae_1_ASV3626	Absence	Presence
1414	Chthonobacter_ASV556	Chthonobacter_ASV556	Absence	Presence
1415	Unknown_Family_Alphaproteobacteria_Incertae_Sedis_ASV5002	Unknown_Family_Alphaproteobacteria_Incertae_Sedis_ASV5002	Absence	Presence
1416	Unclassified_Rhodobacteraceae_69_ASV4413	Unclassified_Rhodobacteraceae_69_ASV4413	Absence	Presence
1417	Unclassified_Rhodobacteraceae_33_ASV4374	Unclassified_Rhodobacteraceae_33_ASV4374	Absence	Presence
1418	Unclassified_Rhodobacteraceae_64_ASV4408	Unclassified_Rhodobacteraceae_64_ASV4408	Absence	Presence
1419	Paracoccus_ASV1603	Paracoccus_ASV1603	Absence	Presence
1420	Paracoccus_ASV1598	Paracoccus_ASV1598	Absence	Presence
1421	Unclassified_Rhodobacteraceae_66_ASV4410	Unclassified_Rhodobacteraceae_66_ASV4410	Absence	Presence
1422	Paracoccus_ASV1602	Paracoccus_ASV1602	Absence	Presence
1423	Paracoccus_ASV1595	Paracoccus_ASV1595	Absence	Presence
1424	Paracoccus_ASV1594	Paracoccus_ASV1594	Absence	Presence
1425	Paracoccus_ASV1601	Paracoccus_ASV1601	Absence	Presence
1426	Unclassified_Rhodobacteraceae_1_ASV4345	Unclassified_Rhodobacteraceae_1_ASV4345	Absence	Presence
1427	Unclassified_Rhodobacteraceae_41_ASV4383	Unclassified_Rhodobacteraceae_41_ASV4383	Absence	Presence
1428	Unclassified_Rhodobacteraceae_53_ASV4396	Unclassified_Rhodobacteraceae_53_ASV4396	Absence	Presence
1429	Unclassified_Rhodobacteraceae_19_ASV4358	Unclassified_Rhodobacteraceae_19_ASV4358	Absence	Presence
1430	Roseovarius_ASV1918	Roseovarius_ASV1918	Absence	Presence
1431	Unclassified_Rhodobacteraceae_76_ASV4421	Unclassified_Rhodobacteraceae_76_ASV4421	Absence	Presence
1432	Unclassified_Rhodobacteraceae_98_ASV4445	Unclassified_Rhodobacteraceae_98_ASV4445	Absence	Presence
1433	Rubellimicrobium_ASV1932	Rubellimicrobium_ASV1932	Absence	Presence
1434	Rubellimicrobium_ASV1926	Rubellimicrobium_ASV1926	Absence	Presence
1435	Unclassified_Rhodobacteraceae_14_ASV4353	Unclassified_Rhodobacteraceae_14_ASV4353	Absence	Presence
1436	Unclassified_Rhodobacteraceae_7_ASV4414	Unclassified_Rhodobacteraceae_7_ASV4414	Absence	Presence
1437	Paracoccus_ASV1600	Paracoccus_ASV1600	Absence	Presence
1438	Paracoccus_ASV1597	Paracoccus_ASV1597	Absence	Presence
1439	Paracoccus_ASV1590	Paracoccus_ASV1590	Absence	Presence
1440	Paracoccus_ASV1593	Paracoccus_ASV1593	Absence	Presence
1441	Unclassified_Rhodobacteraceae_6_ASV4403	Unclassified_Rhodobacteraceae_6_ASV4403	Absence	Presence
1442	Unclassified_Rhodobacteraceae_70_ASV4415	Unclassified_Rhodobacteraceae_70_ASV4415	Absence	Presence
1443	Roseovarius_ASV1915	Roseovarius_ASV1915	Absence	Presence
1444	Sulfitobacter_ASV2273	Sulfitobacter_ASV2273	Absence	Presence
1445	Roseovarius_ASV1916	Roseovarius_ASV1916	Absence	Presence
1446	Unclassified_Rhodobacteraceae_49_ASV4391	Unclassified_Rhodobacteraceae_49_ASV4391	Absence	Presence
1447	Unclassified_Rhodobacteraceae_65_ASV4409	Unclassified_Rhodobacteraceae_65_ASV4409	Absence	Presence
1448	Unclassified_Rhodobacteraceae_18_ASV4357	Unclassified_Rhodobacteraceae_18_ASV4357	Absence	Presence
1449	Unclassified_Rhodobacteraceae_85_ASV4431	Unclassified_Rhodobacteraceae_85_ASV4431	Absence	Presence
1450	Unclassified_Rhodobacteraceae_84_ASV4430	Unclassified_Rhodobacteraceae_84_ASV4430	Absence	Presence
1451	Unclassified_Rhodobacteraceae_37_ASV4378	Unclassified_Rhodobacteraceae_37_ASV4378	Absence	Presence
1452	Unclassified_Rhodobacteraceae_51_ASV4394	Unclassified_Rhodobacteraceae_51_ASV4394	Absence	Presence
1453	Unclassified_Rhodobacteraceae_83_ASV4429	Unclassified_Rhodobacteraceae_83_ASV4429	Absence	Presence
1454	Unclassified_Rhodobacteraceae_68_ASV4412	Unclassified_Rhodobacteraceae_68_ASV4412	Absence	Presence
1455	Unclassified_Rhodobacteraceae_27_ASV4367	Unclassified_Rhodobacteraceae_27_ASV4367	Absence	Presence
1456	Unclassified_Rhodobacteraceae_2_ASV4359	Unclassified_Rhodobacteraceae_2_ASV4359	Absence	Presence
1457	Paracoccus_ASV1596	Paracoccus_ASV1596	Absence	Presence
1458	Rhodobacter_ASV1827	Rhodobacter_ASV1827	Absence	Presence
1459	Rhodobacter_ASV1825	Rhodobacter_ASV1825	Absence	Presence
1460	Rhodobacter_ASV1824	Rhodobacter_ASV1824	Absence	Presence
1461	Unclassified_Rhodobacteraceae_15_ASV4354	Unclassified_Rhodobacteraceae_15_ASV4354	Absence	Presence
1462	Unclassified_Rhodobacteraceae_59_ASV4402	Unclassified_Rhodobacteraceae_59_ASV4402	Absence	Presence
1463	Unclassified_Rhodobacteraceae_71_ASV4416	Unclassified_Rhodobacteraceae_71_ASV4416	Absence	Presence
1464	Unclassified_Rhodobacteraceae_26_ASV4366	Unclassified_Rhodobacteraceae_26_ASV4366	Absence	Presence
1465	Unclassified_Rhodobacteraceae_17_ASV4356	Unclassified_Rhodobacteraceae_17_ASV4356	Absence	Presence
1466	Unclassified_Rhodobacteraceae_80_ASV4426	Unclassified_Rhodobacteraceae_80_ASV4426	Absence	Presence
1467	Unclassified_Rhodobacteraceae_32_ASV4373	Unclassified_Rhodobacteraceae_32_ASV4373	Absence	Presence
1468	Gemmobacter_ASV1007	Gemmobacter_ASV1007	Absence	Presence
1469	Unclassified_Rhodobacteraceae_63_ASV4407	Unclassified_Rhodobacteraceae_63_ASV4407	Absence	Presence
1470	Unclassified_Rhodobacteraceae_95_ASV4442	Unclassified_Rhodobacteraceae_95_ASV4442	Absence	Presence
1471	Unclassified_Rhodobacteraceae_35_ASV4376	Unclassified_Rhodobacteraceae_35_ASV4376	Absence	Presence
1472	Unclassified_Rhodobacteraceae_60_ASV4404	Unclassified_Rhodobacteraceae_60_ASV4404	Absence	Presence
1473	Unclassified_Rhodobacteraceae_88_ASV4434	Unclassified_Rhodobacteraceae_88_ASV4434	Absence	Presence
1474	Unclassified_Rhodobacteraceae_21_ASV4361	Unclassified_Rhodobacteraceae_21_ASV4361	Absence	Presence
1475	Mesorhizobium_ASV1352	Mesorhizobium_ASV1352	Absence	Presence
1476	Unclassified_Rhizobiaceae_12_ASV4296	Unclassified_Rhizobiaceae_12_ASV4296	Absence	Presence
1477	Unclassified_Rhizobiaceae_8_ASV4320	Unclassified_Rhizobiaceae_8_ASV4320	Absence	Presence
1478	Unclassified_Rhizobiaceae_29_ASV4314	Unclassified_Rhizobiaceae_29_ASV4314	Absence	Presence
1479	Unclassified_Rhizobiaceae_16_ASV4300	Unclassified_Rhizobiaceae_16_ASV4300	Absence	Presence
1480	Unclassified_Rhizobiaceae_4_ASV4316	Unclassified_Rhizobiaceae_4_ASV4316	Absence	Presence
1481	Aquamicrobium_ASV202	Aquamicrobium_ASV202	Absence	Presence
1482	Aquamicrobium_ASV201	Aquamicrobium_ASV201	Absence	Presence
1483	Aquamicrobium_ASV203	Aquamicrobium_ASV203	Absence	Presence
1484	Dichotomicrobium_ASV840	Dichotomicrobium_ASV840	Absence	Presence
1485	Filomicrobium_ASV920	Filomicrobium_ASV920	Absence	Presence
1486	Filomicrobium_ASV921	Filomicrobium_ASV921	Absence	Presence
1487	Unclassified_Rhodobacteraceae_23_ASV4363	Unclassified_Rhodobacteraceae_23_ASV4363	Absence	Presence
1488	Unclassified_Methyloligellaceae_2_ASV3834	Unclassified_Methyloligellaceae_2_ASV3834	Absence	Presence
1489	Unclassified_Kiloniellaceae_4_ASV3676	Unclassified_Kiloniellaceae_4_ASV3676	Absence	Presence
1490	Unclassified_Alphaproteobacteria_9_ASV2577	Unclassified_Alphaproteobacteria_9_ASV2577	Absence	Presence
1491	Unclassified_Alphaproteobacteria_10_ASV2542	Unclassified_Alphaproteobacteria_10_ASV2542	Absence	Presence
1492	Unclassified_Rhodobacteraceae_3_ASV4370	Unclassified_Rhodobacteraceae_3_ASV4370	Absence	Presence
1493	Unclassified_Kiloniellaceae_7_ASV3679	Unclassified_Kiloniellaceae_7_ASV3679	Absence	Presence
1494	Unclassified_A0839_1_ASV2428	Unclassified_A0839_1_ASV2428	Absence	Presence
1495	Unclassified_A0839_2_ASV2429	Unclassified_A0839_2_ASV2429	Absence	Presence
1496	Unclassified_Terasakiellaceae_1_ASV4844	Unclassified_Terasakiellaceae_1_ASV4844	Absence	Presence
1497	Unclassified_Rhodospirillaceae_1_ASV4453	Unclassified_Rhodospirillaceae_1_ASV4453	Absence	Presence
1498	Unclassified_Terasakiellaceae_3_ASV4846	Unclassified_Terasakiellaceae_3_ASV4846	Absence	Presence
1499	Unclassified_Terasakiellaceae_2_ASV4845	Unclassified_Terasakiellaceae_2_ASV4845	Absence	Presence
1500	Unclassified_Kiloniellaceae_6_ASV3678	Unclassified_Kiloniellaceae_6_ASV3678	Absence	Presence
1501	Thalassospira_ASV2346	Thalassospira_ASV2346	Absence	Presence
1502	Thalassospira_ASV2347	Thalassospira_ASV2347	Absence	Presence
1503	Unclassified_Puniceispirillales_1_ASV4268	Unclassified_Puniceispirillales_1_ASV4268	Absence	Presence
1504	Unclassified_Reyranellaceae_1_ASV4269	Unclassified_Reyranellaceae_1_ASV4269	Absence	Presence
1505	Unclassified_Alphaproteobacteria_17_ASV2549	Unclassified_Alphaproteobacteria_17_ASV2549	Absence	Presence
1506	Unclassified_Alphaproteobacteria_3_ASV2563	Unclassified_Alphaproteobacteria_3_ASV2563	Absence	Presence
1507	Unclassified_Alphaproteobacteria_26_ASV2559	Unclassified_Alphaproteobacteria_26_ASV2559	Absence	Presence
1508	Unclassified_Alphaproteobacteria_32_ASV2566	Unclassified_Alphaproteobacteria_32_ASV2566	Absence	Presence
1509	Unclassified_Thalassobaculales_2_ASV4850	Unclassified_Thalassobaculales_2_ASV4850	Absence	Presence
1510	Unclassified_Alphaproteobacteria_7_ASV2575	Unclassified_Alphaproteobacteria_7_ASV2575	Absence	Presence
1511	Unclassified_Thalassobaculales_5_ASV4853	Unclassified_Thalassobaculales_5_ASV4853	Absence	Presence
1512	Unclassified_Thalassobaculales_4_ASV4852	Unclassified_Thalassobaculales_4_ASV4852	Absence	Presence
1513	Unclassified_Alphaproteobacteria_28_ASV2561	Unclassified_Alphaproteobacteria_28_ASV2561	Absence	Presence
1514	Unclassified_Acetobacteraceae_2_ASV2467	Unclassified_Acetobacteraceae_2_ASV2467	Absence	Presence
1515	Roseomonas_ASV1912	Roseomonas_ASV1912	Absence	Presence
1516	Unclassified_Acetobacteraceae_9_ASV2474	Unclassified_Acetobacteraceae_9_ASV2474	Absence	Presence
1517	Asaia_ASV225	Asaia_ASV225	Absence	Presence
1518	Unclassified_Azospirillaceae_2_ASV2662	Unclassified_Azospirillaceae_2_ASV2662	Absence	Presence
1519	Unclassified_Azospirillaceae_1_ASV2661	Unclassified_Azospirillaceae_1_ASV2661	Absence	Presence
1520	Unclassified_Alphaproteobacteria_22_ASV2555	Unclassified_Alphaproteobacteria_22_ASV2555	Absence	Presence
1521	Defluviicoccus_ASV720	Defluviicoccus_ASV720	Absence	Presence
1522	Unclassified_Defluviicoccales_1_ASV3220	Unclassified_Defluviicoccales_1_ASV3220	Absence	Presence
1523	Defluviicoccus_ASV721	Defluviicoccus_ASV721	Absence	Presence
1524	Unclassified_Alphaproteobacteria_16_ASV2548	Unclassified_Alphaproteobacteria_16_ASV2548	Absence	Presence
1525	Unclassified_Alphaproteobacteria_11_ASV2543	Unclassified_Alphaproteobacteria_11_ASV2543	Absence	Presence
1526	Unclassified_Kiloniellaceae_5_ASV3677	Unclassified_Kiloniellaceae_5_ASV3677	Absence	Presence
1527	Unclassified_Kiloniellaceae_3_ASV3675	Unclassified_Kiloniellaceae_3_ASV3675	Absence	Presence
1528	Tistlia_ASV2372	Tistlia_ASV2372	Absence	Presence
1529	Pelagibius_ASV1615	Pelagibius_ASV1615	Absence	Presence
1530	Unclassified_Kiloniellaceae_2_ASV3674	Unclassified_Kiloniellaceae_2_ASV3674	Absence	Presence
1531	Unclassified_Fodinicurvataceae_1_ASV3455	Unclassified_Fodinicurvataceae_1_ASV3455	Absence	Presence
1532	Unclassified_Kiloniellaceae_8_ASV3680	Unclassified_Kiloniellaceae_8_ASV3680	Absence	Presence
1533	Rhodovibrio_ASV1870	Rhodovibrio_ASV1870	Absence	Presence
1534	Rhodovibrio_ASV1873	Rhodovibrio_ASV1873	Absence	Presence
1535	Rhodovibrio_ASV1871	Rhodovibrio_ASV1871	Absence	Presence
1536	Unclassified_Kiloniellaceae_1_ASV3673	Unclassified_Kiloniellaceae_1_ASV3673	Absence	Presence
1537	Rhodovibrio_ASV1872	Rhodovibrio_ASV1872	Absence	Presence
1538	Rhodovibrio_ASV1874	Rhodovibrio_ASV1874	Absence	Presence
1539	Cardiobacterium_ASV495	Cardiobacterium_ASV495	Absence	Presence
1540	Unclassified_Bacteroidales_15_ASV2715	Unclassified_Bacteroidales_15_ASV2715	Absence	Presence
1541	Unclassified_Sphingomonadaceae_1_ASV4747	Unclassified_Sphingomonadaceae_1_ASV4747	Absence	Presence
1542	Ellin6055_ASV859	Ellin6055_ASV859	Absence	Presence
1543	Sphingomonas_ASV2124	Sphingomonas_ASV2124	Absence	Presence
1544	Sphingomonas_ASV2139	Sphingomonas_ASV2139	Absence	Presence
1545	Sphingomonas_ASV2136	Sphingomonas_ASV2136	Absence	Presence
1546	Sandaracinobacter_ASV2032	Sandaracinobacter_ASV2032	Absence	Presence
1547	Sandaracinobacter_ASV2031	Sandaracinobacter_ASV2031	Absence	Presence
1548	Sandaracinobacter_ASV2029	Sandaracinobacter_ASV2029	Absence	Presence
1549	Sphingoaurantiacus_ASV2112	Sphingoaurantiacus_ASV2112	Absence	Presence
1550	Sphingopyxis_ASV2145	Sphingopyxis_ASV2145	Absence	Presence
1551	Magnetospirillum_ASV1299	Magnetospirillum_ASV1299	Absence	Presence
1552	Unclassified_Micavibrionales_1_ASV3842	Unclassified_Micavibrionales_1_ASV3842	Absence	Presence
1553	Unclassified_Magnetospiraceae_2_ASV3790	Unclassified_Magnetospiraceae_2_ASV3790	Absence	Presence
1554	Unclassified_Micavibrionaceae_2_ASV3838	Unclassified_Micavibrionaceae_2_ASV3838	Absence	Presence
1555	Unclassified_Micavibrionaceae_3_ASV3839	Unclassified_Micavibrionaceae_3_ASV3839	Absence	Presence
1556	Unclassified_Micavibrionaceae_4_ASV3840	Unclassified_Micavibrionaceae_4_ASV3840	Absence	Presence
1557	Unclassified_Micavibrionaceae_5_ASV3841	Unclassified_Micavibrionaceae_5_ASV3841	Absence	Presence
1558	Unclassified_Micavibrionaceae_1_ASV3837	Unclassified_Micavibrionaceae_1_ASV3837	Absence	Presence
1559	Sphingobium_ASV2118	Sphingobium_ASV2118	Absence	Presence
1560	Unclassified_Sphingomonadaceae_13_ASV4751	Unclassified_Sphingomonadaceae_13_ASV4751	Absence	Presence
1561	Novosphingobium_ASV1511	Novosphingobium_ASV1511	Absence	Presence
1562	Sphingobium_ASV2117	Sphingobium_ASV2117	Absence	Presence
1563	Unclassified_Sphingomonadaceae_12_ASV4750	Unclassified_Sphingomonadaceae_12_ASV4750	Absence	Presence
1564	Unclassified_Sphingomonadaceae_9_ASV4760	Unclassified_Sphingomonadaceae_9_ASV4760	Absence	Presence
1565	Altererythrobacter_ASV164	Altererythrobacter_ASV164	Absence	Presence
1566	Unclassified_Alphaproteobacteria_6_ASV2574	Unclassified_Alphaproteobacteria_6_ASV2574	Absence	Presence
1567	Geothermobacter_ASV1012	Geothermobacter_ASV1012	Absence	Presence
1568	Unclassified_SAR324_clade(Marine_group_B)_7_ASV4601	Unclassified_SAR324_clade(Marine_group_B)_7_ASV4601	Absence	Presence
1569	Unclassified_SAR324_clade(Marine_group_B)_3_ASV4597	Unclassified_SAR324_clade(Marine_group_B)_3_ASV4597	Absence	Presence
1570	Unclassified_Sva0485_1_ASV4825	Unclassified_Sva0485_1_ASV4825	Absence	Presence
1571	Haliangium_ASV1050	Haliangium_ASV1050	Absence	Presence
1572	Haliangium_ASV1051	Haliangium_ASV1051	Absence	Presence
1573	Haliangium_ASV1049	Haliangium_ASV1049	Absence	Presence
1574	Haliangium_ASV1052	Haliangium_ASV1052	Absence	Presence
1575	P3OB-42_ASV1570	P3OB-42_ASV1570	Absence	Presence
1576	P3OB-42_ASV1561	P3OB-42_ASV1561	Absence	Presence
1577	P3OB-42_ASV1572	P3OB-42_ASV1572	Absence	Presence
1578	Unclassified_Nannocystaceae_3_ASV3921	Unclassified_Nannocystaceae_3_ASV3921	Absence	Presence
1579	Unclassified_Nannocystaceae_1_ASV3919	Unclassified_Nannocystaceae_1_ASV3919	Absence	Presence
1580	Desulfobacca_ASV769	Desulfobacca_ASV769	Absence	Presence
1581	SEEP-SRB1_ASV2070	SEEP-SRB1_ASV2070	Absence	Presence
1582	SEEP-SRB1_ASV2067	SEEP-SRB1_ASV2067	Absence	Presence
1583	Unclassified_Sva0485_2_ASV4826	Unclassified_Sva0485_2_ASV4826	Absence	Presence
1584	Unclassified_Sva0485_4_ASV4828	Unclassified_Sva0485_4_ASV4828	Absence	Presence
1585	Unclassified_Sva0485_7_ASV4831	Unclassified_Sva0485_7_ASV4831	Absence	Presence
1586	Desulfomonile_ASV789	Desulfomonile_ASV789	Absence	Presence
1587	Unclassified_NB1-j_11_ASV3925	Unclassified_NB1-j_11_ASV3925	Absence	Presence
1588	Unclassified_Desulfobacterota_7_ASV3247	Unclassified_Desulfobacterota_7_ASV3247	Absence	Presence
1589	Bdellovibrio_ASV300	Bdellovibrio_ASV300	Absence	Presence
1590	Bdellovibrio_ASV298	Bdellovibrio_ASV298	Absence	Presence
1591	Bdellovibrio_ASV294	Bdellovibrio_ASV294	Absence	Presence
1592	Bdellovibrio_ASV296	Bdellovibrio_ASV296	Absence	Presence
1593	Bdellovibrio_ASV297	Bdellovibrio_ASV297	Absence	Presence
1594	Bdellovibrio_ASV302	Bdellovibrio_ASV302	Absence	Presence
1595	Unclassified_Desulfobacterota_12_ASV3240	Unclassified_Desulfobacterota_12_ASV3240	Absence	Presence
1596	Unclassified_PB19_3_ASV4073	Unclassified_PB19_3_ASV4073	Absence	Presence
1597	Unclassified_mle1-27_2_ASV3886	Unclassified_mle1-27_2_ASV3886	Absence	Presence
1598	Unclassified_Desulfobacterota_10_ASV3238	Unclassified_Desulfobacterota_10_ASV3238	Absence	Presence
1599	Unclassified_PB19_2_ASV4072	Unclassified_PB19_2_ASV4072	Absence	Presence
1600	Unclassified_PB19_1_ASV4071	Unclassified_PB19_1_ASV4071	Absence	Presence
1601	Unclassified_SAR324_clade(Marine_group_B)_6_ASV4600	Unclassified_SAR324_clade(Marine_group_B)_6_ASV4600	Absence	Presence
1602	Unclassified_SAR324_clade(Marine_group_B)_2_ASV4596	Unclassified_SAR324_clade(Marine_group_B)_2_ASV4596	Absence	Presence
1603	Unclassified_SAR324_clade(Marine_group_B)_14_ASV4594	Unclassified_SAR324_clade(Marine_group_B)_14_ASV4594	Absence	Presence
1604	Unclassified_SAR324_clade(Marine_group_B)_8_ASV4602	Unclassified_SAR324_clade(Marine_group_B)_8_ASV4602	Absence	Presence
1605	Unclassified_bacteriap25_1_ASV2701	Unclassified_bacteriap25_1_ASV2701	Absence	Presence
1606	Unclassified_bacteriap25_4_ASV2704	Unclassified_bacteriap25_4_ASV2704	Absence	Presence
1607	Unclassified_Bradymonadaceae_12_ASV2923	Unclassified_Bradymonadaceae_12_ASV2923	Absence	Presence
1608	Unclassified_Bradymonadaceae_14_ASV2925	Unclassified_Bradymonadaceae_14_ASV2925	Absence	Presence
1609	Unclassified_Bradymonadaceae_2_ASV2931	Unclassified_Bradymonadaceae_2_ASV2931	Absence	Presence
1610	Unclassified_Bradymonadaceae_4_ASV2933	Unclassified_Bradymonadaceae_4_ASV2933	Absence	Presence
1611	Unclassified_Bradymonadaceae_8_ASV2937	Unclassified_Bradymonadaceae_8_ASV2937	Absence	Presence
1612	Unclassified_Bradymonadaceae_19_ASV2930	Unclassified_Bradymonadaceae_19_ASV2930	Absence	Presence
1613	Unclassified_Bradymonadaceae_7_ASV2936	Unclassified_Bradymonadaceae_7_ASV2936	Absence	Presence
1614	Unclassified_Bradymonadaceae_11_ASV2922	Unclassified_Bradymonadaceae_11_ASV2922	Absence	Presence
1615	Unclassified_Bradymonadaceae_5_ASV2934	Unclassified_Bradymonadaceae_5_ASV2934	Absence	Presence
1616	Unclassified_Bradymonadaceae_18_ASV2929	Unclassified_Bradymonadaceae_18_ASV2929	Absence	Presence
1617	Unclassified_Bradymonadales_3_ASV2948	Unclassified_Bradymonadales_3_ASV2948	Absence	Presence
1618	Unclassified_Bradymonadales_1_ASV2939	Unclassified_Bradymonadales_1_ASV2939	Absence	Presence
1619	Unclassified_Bradymonadales_10_ASV2941	Unclassified_Bradymonadales_10_ASV2941	Absence	Presence
1620	Unclassified_Bradymonadales_12_ASV2943	Unclassified_Bradymonadales_12_ASV2943	Absence	Presence
1621	Unclassified_Bradymonadales_7_ASV2952	Unclassified_Bradymonadales_7_ASV2952	Absence	Presence
1622	Unclassified_Bradymonadales_1_ASV2940	Unclassified_Bradymonadales_1_ASV2940	Absence	Presence
1623	Unclassified_Bradymonadaceae_10_ASV2921	Unclassified_Bradymonadaceae_10_ASV2921	Absence	Presence
1624	Unclassified_Bradymonadaceae_13_ASV2924	Unclassified_Bradymonadaceae_13_ASV2924	Absence	Presence
1625	Unclassified_Bradymonadaceae_17_ASV2928	Unclassified_Bradymonadaceae_17_ASV2928	Absence	Presence
1626	Unclassified_Bradymonadaceae_3_ASV2932	Unclassified_Bradymonadaceae_3_ASV2932	Absence	Presence
1627	Unclassified_Bradymonadaceae_1_ASV2920	Unclassified_Bradymonadaceae_1_ASV2920	Absence	Presence
1628	Unclassified_Bradymonadales_13_ASV2944	Unclassified_Bradymonadales_13_ASV2944	Absence	Presence
1629	Unclassified_Bradymonadales_14_ASV2945	Unclassified_Bradymonadales_14_ASV2945	Absence	Presence
1630	Unclassified_Bradymonadales_4_ASV2949	Unclassified_Bradymonadales_4_ASV2949	Absence	Presence
1631	Unclassified_Desulfobacterota_3_ASV3243	Unclassified_Desulfobacterota_3_ASV3243	Absence	Presence
1632	Unclassified_Bradymonadales_11_ASV2942	Unclassified_Bradymonadales_11_ASV2942	Absence	Presence
1633	Unclassified_Desulfobacterota_8_ASV3248	Unclassified_Desulfobacterota_8_ASV3248	Absence	Presence
1634	Unclassified_Bradymonadales_8_ASV2953	Unclassified_Bradymonadales_8_ASV2953	Absence	Presence
1635	Unclassified_Desulfovibrionaceae_1_ASV3278	Unclassified_Desulfovibrionaceae_1_ASV3278	Absence	Presence
1636	Desulfovibrio_ASV813	Desulfovibrio_ASV813	Absence	Presence
1637	Unclassified_Desulfovibrionales_1_ASV3291	Unclassified_Desulfovibrionales_1_ASV3291	Absence	Presence
1638	Desulfovermiculus_ASV801	Desulfovermiculus_ASV801	Absence	Presence
1639	Desulfovermiculus_ASV802	Desulfovermiculus_ASV802	Absence	Presence
1640	Desulfovermiculus_ASV800	Desulfovermiculus_ASV800	Absence	Presence
1641	Desulfovibrio_ASV818	Desulfovibrio_ASV818	Absence	Presence
1642	Desulfovibrio_ASV822	Desulfovibrio_ASV822	Absence	Presence
1643	Desulfovibrio_ASV812	Desulfovibrio_ASV812	Absence	Presence
1644	Desulfovibrio_ASV815	Desulfovibrio_ASV815	Absence	Presence
1645	Desulfovibrio_ASV816	Desulfovibrio_ASV816	Absence	Presence
1646	Desulfovibrio_ASV817	Desulfovibrio_ASV817	Absence	Presence
1647	Desulfovibrio_ASV809	Desulfovibrio_ASV809	Absence	Presence
1648	Desulfovibrio_ASV819	Desulfovibrio_ASV819	Absence	Presence
1649	Desulfovibrio_ASV807	Desulfovibrio_ASV807	Absence	Presence
1650	Desulfovibrio_ASV811	Desulfovibrio_ASV811	Absence	Presence
1651	Unclassified_Silvanigrellaceae_1_ASV4723	Unclassified_Silvanigrellaceae_1_ASV4723	Absence	Presence
1652	Unclassified_Oligoflexaceae_5_ASV3997	Unclassified_Oligoflexaceae_5_ASV3997	Absence	Presence
1653	Unclassified_Oligoflexaceae_1_ASV3993	Unclassified_Oligoflexaceae_1_ASV3993	Absence	Presence
1654	Unclassified_Hydrogenedensaceae_1_ASV3617	Unclassified_Hydrogenedensaceae_1_ASV3617	Absence	Presence
1655	Unclassified_Hydrogenedensaceae_4_ASV3620	Unclassified_Hydrogenedensaceae_4_ASV3620	Absence	Presence
1656	YC-ZSS-LKJ63_ASV5114	YC-ZSS-LKJ63_ASV5114	Absence	Presence
1657	Abditibacterium_ASV31	Abditibacterium_ASV31	Absence	Presence
1658	Unclassified_WPS-2_ASV5105	Unclassified_WPS-2_ASV5105	Absence	Presence
1659	Unclassified_vadinHA49_7_ASV4884	Unclassified_vadinHA49_7_ASV4884	Absence	Presence
1660	Acanthopleuribacter_ASV34	Acanthopleuribacter_ASV34	Absence	Presence
1661	Acanthopleuribacter_ASV33	Acanthopleuribacter_ASV33	Absence	Presence
1662	Unknown_Family_Gammaproteobacteria_Incertae_Sedis_1_ASV5003	Unknown_Family_Gammaproteobacteria_Incertae_Sedis_1_ASV5003	Absence	Presence
1663	Unclassified_Solimonadaceae_2_ASV4739	Unclassified_Solimonadaceae_2_ASV4739	Absence	Presence
1664	Pseudomonas_ASV1754	Pseudomonas_ASV1754	Absence	Presence
1665	Pseudofulvimonas_ASV1744	Pseudofulvimonas_ASV1744	Absence	Presence
1666	MND1_ASV1402	MND1_ASV1402	Absence	Presence
1667	Unclassified_Nitrosomonadaceae_2_ASV3975	Unclassified_Nitrosomonadaceae_2_ASV3975	Absence	Presence
1668	Unclassified_Sutterellaceae_2_ASV4824	Unclassified_Sutterellaceae_2_ASV4824	Absence	Presence
1669	Azoarcus_ASV247	Azoarcus_ASV247	Absence	Presence
1670	Unclassified_Rhodocyclaceae_4_ASV4450	Unclassified_Rhodocyclaceae_4_ASV4450	Absence	Presence
1671	Thauera_ASV2349	Thauera_ASV2349	Absence	Presence
1672	Unclassified_Rhodocyclaceae_3_ASV4449	Unclassified_Rhodocyclaceae_3_ASV4449	Absence	Presence
1673	Unclassified_Rhodocyclaceae_1_ASV4447	Unclassified_Rhodocyclaceae_1_ASV4447	Absence	Presence
1674	Unclassified_Rhodocyclaceae_2_ASV4448	Unclassified_Rhodocyclaceae_2_ASV4448	Absence	Presence
1675	Unclassified_B1-7BS_ASV248	Unclassified_B1-7BS_ASV248	Absence	Presence
1676	Unclassified_Burkholderiales_1_ASV2958	Unclassified_Burkholderiales_1_ASV2958	Absence	Presence
1677	Unclassified_Rhodocyclaceae_5_ASV4451	Unclassified_Rhodocyclaceae_5_ASV4451	Absence	Presence
1678	Thauera_ASV2348	Thauera_ASV2348	Absence	Presence
1679	Unclassified_Comamonadaceae_22_ASV3119	Unclassified_Comamonadaceae_22_ASV3119	Absence	Presence
1680	Unclassified_Comamonadaceae_5_ASV3132	Unclassified_Comamonadaceae_5_ASV3132	Absence	Presence
1681	Unclassified_Comamonadaceae_15_ASV3111	Unclassified_Comamonadaceae_15_ASV3111	Absence	Presence
1682	Unclassified_Comamonadaceae_32_ASV3130	Unclassified_Comamonadaceae_32_ASV3130	Absence	Presence
1683	Unclassified_Comamonadaceae_19_ASV3115	Unclassified_Comamonadaceae_19_ASV3115	Absence	Presence
1684	Unclassified_Comamonadaceae_11_ASV3107	Unclassified_Comamonadaceae_11_ASV3107	Absence	Presence
1685	Brachymonas_ASV351	Brachymonas_ASV351	Absence	Presence
1686	Comamonas_ASV637	Comamonas_ASV637	Absence	Presence
1687	Unclassified_Comamonadaceae_24_ASV3121	Unclassified_Comamonadaceae_24_ASV3121	Absence	Presence
1688	Unclassified_Comamonadaceae_12_ASV3108	Unclassified_Comamonadaceae_12_ASV3108	Absence	Presence
1689	Unclassified_Comamonadaceae_16_ASV3112	Unclassified_Comamonadaceae_16_ASV3112	Absence	Presence
1690	Unclassified_Comamonadaceae_25_ASV3122	Unclassified_Comamonadaceae_25_ASV3122	Absence	Presence
1691	Unclassified_Comamonadaceae_9_ASV3136	Unclassified_Comamonadaceae_9_ASV3136	Absence	Presence
1692	Unclassified_Comamonadaceae_10_ASV3106	Unclassified_Comamonadaceae_10_ASV3106	Absence	Presence
1693	Unclassified_Comamonadaceae_27_ASV3124	Unclassified_Comamonadaceae_27_ASV3124	Absence	Presence
1694	Comamonas_ASV638	Comamonas_ASV638	Absence	Presence
1695	Hydrogenophaga_ASV1098	Hydrogenophaga_ASV1098	Absence	Presence
1696	Unclassified_Comamonadaceae_21_ASV3118	Unclassified_Comamonadaceae_21_ASV3118	Absence	Presence
1697	Unclassified_Comamonadaceae_23_ASV3120	Unclassified_Comamonadaceae_23_ASV3120	Absence	Presence
1698	Methylotenera_ASV1392	Methylotenera_ASV1392	Absence	Presence
1699	Unclassified_Neisseriaceae_5_ASV3952	Unclassified_Neisseriaceae_5_ASV3952	Absence	Presence
1700	Unclassified_Neisseriaceae_7_ASV3954	Unclassified_Neisseriaceae_7_ASV3954	Absence	Presence
1701	Unclassified_Neisseriaceae_8_ASV3955	Unclassified_Neisseriaceae_8_ASV3955	Absence	Presence
1702	Unclassified_Neisseriaceae_6_ASV3953	Unclassified_Neisseriaceae_6_ASV3953	Absence	Presence
1703	Neisseria_ASV1466	Neisseria_ASV1466	Absence	Presence
1704	Neisseria_ASV1467	Neisseria_ASV1467	Absence	Presence
1705	Neisseria_ASV1465	Neisseria_ASV1465	Absence	Presence
1706	Neisseria_ASV1469	Neisseria_ASV1469	Absence	Presence
1707	Neisseria_ASV1468	Neisseria_ASV1468	Absence	Presence
1708	Snodgrassella_ASV2104	Snodgrassella_ASV2104	Absence	Presence
1709	Unclassified_Neisseriaceae_11_ASV3947	Unclassified_Neisseriaceae_11_ASV3947	Absence	Presence
1710	Alysiella_ASV170	Alysiella_ASV170	Absence	Presence
1711	Limnobacter_ASV1269	Limnobacter_ASV1269	Absence	Presence
1712	Lautropia_ASV1188	Lautropia_ASV1188	Absence	Presence
1713	Polynucleobacter_ASV1706	Polynucleobacter_ASV1706	Absence	Presence
1714	Castellaniella_ASV496	Castellaniella_ASV496	Absence	Presence
1715	Pusillimonas_ASV1795	Pusillimonas_ASV1795	Absence	Presence
1716	Pusillimonas_ASV1796	Pusillimonas_ASV1796	Absence	Presence
1717	Alcaligenes_ASV108	Alcaligenes_ASV108	Absence	Presence
1718	Unclassified_Alcaligenaceae_2_ASV2537	Unclassified_Alcaligenaceae_2_ASV2537	Absence	Presence
1719	GKS98_freshwater_group_ASV1019	GKS98_freshwater_group_ASV1019	Absence	Presence
1720	Unclassified_Hydrogenophilaceae_5_ASV3625	Unclassified_Hydrogenophilaceae_5_ASV3625	Absence	Presence
1721	Noviherbaspirillum_ASV1508	Noviherbaspirillum_ASV1508	Absence	Presence
1722	Lautropia_ASV1191	Lautropia_ASV1191	Absence	Presence
1723	Lautropia_ASV1190	Lautropia_ASV1190	Absence	Presence
1724	Nitrosomonas_ASV1483	Nitrosomonas_ASV1483	Absence	Presence
1725	Nitrosomonas_ASV1484	Nitrosomonas_ASV1484	Absence	Presence
1726	Nitrosomonas_ASV1482	Nitrosomonas_ASV1482	Absence	Presence
1727	Unclassified_Nitrosomonadaceae_1_ASV3974	Unclassified_Nitrosomonadaceae_1_ASV3974	Absence	Presence
1728	Salinisphaera_ASV2011	Salinisphaera_ASV2011	Absence	Presence
1729	Salinisphaera_ASV2017	Salinisphaera_ASV2017	Absence	Presence
1730	Salinisphaera_ASV2012	Salinisphaera_ASV2012	Absence	Presence
1731	Salinisphaera_ASV1989	Salinisphaera_ASV1989	Absence	Presence
1732	Salinisphaera_ASV2004	Salinisphaera_ASV2004	Absence	Presence
1733	Salinisphaera_ASV1988	Salinisphaera_ASV1988	Absence	Presence
1734	Salinisphaera_ASV2000	Salinisphaera_ASV2000	Absence	Presence
1735	Salinisphaera_ASV2021	Salinisphaera_ASV2021	Absence	Presence
1736	Unknown_Family_Gammaproteobacteria_Incertae_Sedis_16_ASV5010	Unknown_Family_Gammaproteobacteria_Incertae_Sedis_16_ASV5010	Absence	Presence
1737	Desulfosarcina_ASV795	Desulfosarcina_ASV795	Absence	Presence
1738	Desulfosarcina_ASV797	Desulfosarcina_ASV797	Absence	Presence
1739	Desulfosarcina_ASV794	Desulfosarcina_ASV794	Absence	Presence
1740	Unclassified_Desulfococcaceae_8_ASV3264	Unclassified_Desulfococcaceae_8_ASV3264	Absence	Presence
1741	Unclassified_Desulfosarcinaceae_9_ASV3277	Unclassified_Desulfosarcinaceae_9_ASV3277	Absence	Presence
1742	Unclassified_Desulfosarcinaceae_5_ASV3273	Unclassified_Desulfosarcinaceae_5_ASV3273	Absence	Presence
1743	Unclassified_Desulfovibrionaceae_9_ASV3290	Unclassified_Desulfovibrionaceae_9_ASV3290	Absence	Presence
1744	Unclassified_Desulfosarcinaceae_8_ASV3276	Unclassified_Desulfosarcinaceae_8_ASV3276	Absence	Presence
1745	Desulfobacter_ASV771	Desulfobacter_ASV771	Absence	Presence
1746	Desulfotignum_ASV799	Desulfotignum_ASV799	Absence	Presence
1747	Unclassified_Desulfosarcinaceae_2_ASV3270	Unclassified_Desulfosarcinaceae_2_ASV3270	Absence	Presence
1748	Unclassified_Desulfosarcinaceae_10_ASV3267	Unclassified_Desulfosarcinaceae_10_ASV3267	Absence	Presence
1749	Unclassified_Desulfovibrionaceae_4_ASV3285	Unclassified_Desulfovibrionaceae_4_ASV3285	Absence	Presence
1750	Unclassified_Desulfovibrionaceae_3_ASV3284	Unclassified_Desulfovibrionaceae_3_ASV3284	Absence	Presence
1751	Desulfatitalea_ASV767	Desulfatitalea_ASV767	Absence	Presence
1752	Desulfatitalea_ASV766	Desulfatitalea_ASV766	Absence	Presence
1753	Unclassified_Desulfobacterales_4_ASV3236	Unclassified_Desulfobacterales_4_ASV3236	Absence	Presence
1754	Unclassified_Desulfovibrionaceae_8_ASV3289	Unclassified_Desulfovibrionaceae_8_ASV3289	Absence	Presence
1755	Unclassified_Desulfococcaceae_9_ASV3265	Unclassified_Desulfococcaceae_9_ASV3265	Absence	Presence
1756	Unclassified_Desulfococcaceae_4_ASV3260	Unclassified_Desulfococcaceae_4_ASV3260	Absence	Presence
1757	Unclassified_Desulfococcaceae_6_ASV3262	Unclassified_Desulfococcaceae_6_ASV3262	Absence	Presence
1758	Unclassified_Desulfococcaceae_7_ASV3263	Unclassified_Desulfococcaceae_7_ASV3263	Absence	Presence
1759	Unclassified_Desulfococcaceae_3_ASV3259	Unclassified_Desulfococcaceae_3_ASV3259	Absence	Presence
1760	Desulfosalsimonas_ASV793	Desulfosalsimonas_ASV793	Absence	Presence
1761	Unclassified_Desulfosarcinaceae_4_ASV3272	Unclassified_Desulfosarcinaceae_4_ASV3272	Absence	Presence
1762	Unclassified_Desulfosarcinaceae_1_ASV3266	Unclassified_Desulfosarcinaceae_1_ASV3266	Absence	Presence
1763	Sva0081_sediment_group_ASV2296	Sva0081_sediment_group_ASV2296	Absence	Presence
1764	Sva0081_sediment_group_ASV2290	Sva0081_sediment_group_ASV2290	Absence	Presence
1765	Sva0081_sediment_group_ASV2291	Sva0081_sediment_group_ASV2291	Absence	Presence
1766	Unclassified_Desulfovibrionaceae_13_ASV3282	Unclassified_Desulfovibrionaceae_13_ASV3282	Absence	Presence
1767	Unclassified_Desulfococcaceae_1_ASV3257	Unclassified_Desulfococcaceae_1_ASV3257	Absence	Presence
1768	Desulfonema_ASV790	Desulfonema_ASV790	Absence	Presence
1769	Unclassified_Desulfococcaceae_5_ASV3261	Unclassified_Desulfococcaceae_5_ASV3261	Absence	Presence
1770	SEEP-SRB1_ASV2065	SEEP-SRB1_ASV2065	Absence	Presence
1771	Sva0081_sediment_group_ASV2294	Sva0081_sediment_group_ASV2294	Absence	Presence
1772	Sva0081_sediment_group_ASV2288	Sva0081_sediment_group_ASV2288	Absence	Presence
1773	Sva0081_sediment_group_ASV2295	Sva0081_sediment_group_ASV2295	Absence	Presence
1774	Sva0081_sediment_group_ASV2285	Sva0081_sediment_group_ASV2285	Absence	Presence
1775	Sva0081_sediment_group_ASV2299	Sva0081_sediment_group_ASV2299	Absence	Presence
1776	Unclassified_Desulfovibrionaceae_7_ASV3288	Unclassified_Desulfovibrionaceae_7_ASV3288	Absence	Presence
1777	Sva0081_sediment_group_ASV2284	Sva0081_sediment_group_ASV2284	Absence	Presence
1778	Sva0081_sediment_group_ASV2293	Sva0081_sediment_group_ASV2293	Absence	Presence
1779	Sva0081_sediment_group_ASV2287	Sva0081_sediment_group_ASV2287	Absence	Presence
1780	Sva0081_sediment_group_ASV2292	Sva0081_sediment_group_ASV2292	Absence	Presence
1781	Sva0081_sediment_group_ASV2286	Sva0081_sediment_group_ASV2286	Absence	Presence
1782	SEEP-SRB1_ASV2066	SEEP-SRB1_ASV2066	Absence	Presence
1783	Unclassified_Desulfovibrionaceae_12_ASV3281	Unclassified_Desulfovibrionaceae_12_ASV3281	Absence	Presence
1784	Unclassified_Gammaproteobacteria_40_ASV3496	Unclassified_Gammaproteobacteria_40_ASV3496	Absence	Presence
1785	Unclassified_Chromatiaceae_8_ASV3068	Unclassified_Chromatiaceae_8_ASV3068	Absence	Presence
1786	Unclassified_Gammaproteobacteria_39_ASV3494	Unclassified_Gammaproteobacteria_39_ASV3494	Absence	Presence
1787	Marinicella_ASV1305	Marinicella_ASV1305	Absence	Presence
1788	Marinicella_ASV1303	Marinicella_ASV1303	Absence	Presence
1789	Marinicella_ASV1304	Marinicella_ASV1304	Absence	Presence
1790	Unclassified_Gammaproteobacteria_56_ASV3513	Unclassified_Gammaproteobacteria_56_ASV3513	Absence	Presence
1791	Unclassified_Thiotrichaceae_2_ASV4860	Unclassified_Thiotrichaceae_2_ASV4860	Absence	Presence
1792	Dokdonella_ASV845	Dokdonella_ASV845	Absence	Presence
1793	Unclassified_Xanthomonadaceae_3_ASV4964	Unclassified_Xanthomonadaceae_3_ASV4964	Absence	Presence
1794	Xanthomonas_ASV5110	Xanthomonas_ASV5110	Absence	Presence
1795	Luteimonas_ASV1280	Luteimonas_ASV1280	Absence	Presence
1796	Thermomonas_ASV2351	Thermomonas_ASV2351	Absence	Presence
1797	Stenotrophomonas_ASV2228	Stenotrophomonas_ASV2228	Absence	Presence
1798	Stenotrophomonas_ASV2225	Stenotrophomonas_ASV2225	Absence	Presence
1799	Stenotrophomonas_ASV2223	Stenotrophomonas_ASV2223	Absence	Presence
1800	Stenotrophomonas_ASV2224	Stenotrophomonas_ASV2224	Absence	Presence
1801	Unclassified_Xanthomonadaceae_2_ASV4963	Unclassified_Xanthomonadaceae_2_ASV4963	Absence	Presence
1802	Unclassified_Xanthomonadaceae_1_ASV4962	Unclassified_Xanthomonadaceae_1_ASV4962	Absence	Presence
1803	Arenimonas_ASV214	Arenimonas_ASV214	Absence	Presence
1804	Arenimonas_ASV211	Arenimonas_ASV211	Absence	Presence
1805	Rhodanobacter_ASV1822	Rhodanobacter_ASV1822	Absence	Presence
1806	Luteibacter_ASV1277	Luteibacter_ASV1277	Absence	Presence
1807	Luteibacter_ASV1279	Luteibacter_ASV1279	Absence	Presence
1808	Rhodanobacter_ASV1820	Rhodanobacter_ASV1820	Absence	Presence
1809	Rhodanobacter_ASV1823	Rhodanobacter_ASV1823	Absence	Presence
1810	Rhodanobacter_ASV1821	Rhodanobacter_ASV1821	Absence	Presence
1811	Rhodanobacter_ASV1817	Rhodanobacter_ASV1817	Absence	Presence
1812	Dyella_ASV853	Dyella_ASV853	Absence	Presence
1813	Unclassified_Rhodanobacteraceae_2_ASV4341	Unclassified_Rhodanobacteraceae_2_ASV4341	Absence	Presence
1814	Rhodanobacter_ASV1818	Rhodanobacter_ASV1818	Absence	Presence
1815	Unclassified_Rhodanobacteraceae_3_ASV4342	Unclassified_Rhodanobacteraceae_3_ASV4342	Absence	Presence
1816	Tahibacter_ASV2318	Tahibacter_ASV2318	Absence	Presence
1817	Methylomicrobium_ASV1382	Methylomicrobium_ASV1382	Absence	Presence
1818	Methylomicrobium_ASV1383	Methylomicrobium_ASV1383	Absence	Presence
1819	Unclassified_Gammaproteobacteria_26_ASV3480	Unclassified_Gammaproteobacteria_26_ASV3480	Absence	Presence
1820	Unclassified_Gammaproteobacteria_14_ASV3467	Unclassified_Gammaproteobacteria_14_ASV3467	Absence	Presence
1821	Unclassified_Gammaproteobacteria_52_ASV3509	Unclassified_Gammaproteobacteria_52_ASV3509	Absence	Presence
1822	Woeseia_ASV5096	Woeseia_ASV5096	Absence	Presence
1823	Unclassified_Wohlfahrtiimonadaceae_3_ASV4949	Unclassified_Wohlfahrtiimonadaceae_3_ASV4949	Absence	Presence
1824	Unclassified_Wohlfahrtiimonadaceae_1_ASV4947	Unclassified_Wohlfahrtiimonadaceae_1_ASV4947	Absence	Presence
1825	Unclassified_Gammaproteobacteria_10_ASV3463	Unclassified_Gammaproteobacteria_10_ASV3463	Absence	Presence
1826	Unclassified_HOC36_1_ASV3610	Unclassified_HOC36_1_ASV3610	Absence	Presence
1827	Unclassified_Gammaproteobacteria_57_ASV3514	Unclassified_Gammaproteobacteria_57_ASV3514	Absence	Presence
1828	Unclassified_Gammaproteobacteria_47_ASV3503	Unclassified_Gammaproteobacteria_47_ASV3503	Absence	Presence
1829	Unclassified_Gammaproteobacteria_32_ASV3487	Unclassified_Gammaproteobacteria_32_ASV3487	Absence	Presence
1830	Methylohalomonas_ASV1381	Methylohalomonas_ASV1381	Absence	Presence
1831	Methylohalomonas_ASV1380	Methylohalomonas_ASV1380	Absence	Presence
1832	Woeseia_ASV5100	Woeseia_ASV5100	Absence	Presence
1833	Unclassified_Gammaproteobacteria_16_ASV3469	Unclassified_Gammaproteobacteria_16_ASV3469	Absence	Presence
1834	Unclassified_Gammaproteobacteria_22_ASV3476	Unclassified_Gammaproteobacteria_22_ASV3476	Absence	Presence
1835	Unclassified_HOC36_2_ASV3611	Unclassified_HOC36_2_ASV3611	Absence	Presence
1836	Unclassified_Gammaproteobacteria_15_ASV3468	Unclassified_Gammaproteobacteria_15_ASV3468	Absence	Presence
1837	Unclassified_HOC36_4_ASV3613	Unclassified_HOC36_4_ASV3613	Absence	Presence
1838	Unclassified_Gammaproteobacteria_45_ASV3501	Unclassified_Gammaproteobacteria_45_ASV3501	Absence	Presence
1839	Unclassified_Gammaproteobacteria_28_ASV3482	Unclassified_Gammaproteobacteria_28_ASV3482	Absence	Presence
1840	Unclassified_Gammaproteobacteria_41_ASV3497	Unclassified_Gammaproteobacteria_41_ASV3497	Absence	Presence
1841	Unclassified_Nitrococcaceae_5_ASV3963	Unclassified_Nitrococcaceae_5_ASV3963	Absence	Presence
1842	Unclassified_Arenicellaceae_2_ASV2654	Unclassified_Arenicellaceae_2_ASV2654	Absence	Presence
1843	Unclassified_Arenicellaceae_1_ASV2653	Unclassified_Arenicellaceae_1_ASV2653	Absence	Presence
1844	Unclassified_Arenicellaceae_3_ASV2655	Unclassified_Arenicellaceae_3_ASV2655	Absence	Presence
1845	Unclassified_Gammaproteobacteria_29_ASV3483	Unclassified_Gammaproteobacteria_29_ASV3483	Absence	Presence
1846	Unclassified_Chromatiaceae_1_ASV3052	Unclassified_Chromatiaceae_1_ASV3052	Absence	Presence
1847	Unclassified_Chromatiaceae_10_ASV3053	Unclassified_Chromatiaceae_10_ASV3053	Absence	Presence
1848	Unclassified_Chromatiaceae_12_ASV3055	Unclassified_Chromatiaceae_12_ASV3055	Absence	Presence
1849	Unclassified_Arenicellaceae_4_ASV2656	Unclassified_Arenicellaceae_4_ASV2656	Absence	Presence
1850	Unclassified_Chromatiaceae_18_ASV3061	Unclassified_Chromatiaceae_18_ASV3061	Absence	Presence
1851	Halochromatium_ASV1056	Halochromatium_ASV1056	Absence	Presence
1852	Unclassified_Chromatiaceae_3_ASV3063	Unclassified_Chromatiaceae_3_ASV3063	Absence	Presence
1853	Unclassified_Nitrococcaceae_2_ASV3960	Unclassified_Nitrococcaceae_2_ASV3960	Absence	Presence
1854	Thiohalocapsa_ASV2357	Thiohalocapsa_ASV2357	Absence	Presence
1855	Unclassified_Chromatiaceae_17_ASV3060	Unclassified_Chromatiaceae_17_ASV3060	Absence	Presence
1856	Unclassified_Chromatiaceae_16_ASV3059	Unclassified_Chromatiaceae_16_ASV3059	Absence	Presence
1857	Candidatus_Thiosymbion_ASV480	Candidatus_Thiosymbion_ASV480	Absence	Presence
1858	Woeseia_ASV5099	Woeseia_ASV5099	Absence	Presence
1859	Woeseia_ASV5098	Woeseia_ASV5098	Absence	Presence
1860	Woeseia_ASV5092	Woeseia_ASV5092	Absence	Presence
1861	Woeseia_ASV5097	Woeseia_ASV5097	Absence	Presence
1862	Coxiella_ASV681	Coxiella_ASV681	Absence	Presence
1863	Woeseia_ASV5101	Woeseia_ASV5101	Absence	Presence
1864	Woeseia_ASV5094	Woeseia_ASV5094	Absence	Presence
1865	Unclassified_Gammaproteobacteria_25_ASV3479	Unclassified_Gammaproteobacteria_25_ASV3479	Absence	Presence
1866	Woeseia_ASV5093	Woeseia_ASV5093	Absence	Presence
1867	Unclassified_Woeseiaceae_2_ASV4944	Unclassified_Woeseiaceae_2_ASV4944	Absence	Presence
1868	Marinobacterium_ASV1318	Marinobacterium_ASV1318	Absence	Presence
1869	Marinobacterium_ASV1317	Marinobacterium_ASV1317	Absence	Presence
1870	Marinomonas_ASV1320	Marinomonas_ASV1320	Absence	Presence
1871	Marinomonas_ASV1321	Marinomonas_ASV1321	Absence	Presence
1872	Marinobacter_ASV1314	Marinobacter_ASV1314	Absence	Presence
1873	Unclassified_Pseudomonadales_2_ASV4251	Unclassified_Pseudomonadales_2_ASV4251	Absence	Presence
1874	Unclassified_KI89A_clade_1_ASV3671	Unclassified_KI89A_clade_1_ASV3671	Absence	Presence
1875	Unclassified_KI89A_clade_2_ASV3672	Unclassified_KI89A_clade_2_ASV3672	Absence	Presence
1876	Saccharospirillum_ASV1965	Saccharospirillum_ASV1965	Absence	Presence
1877	Saccharospirillum_ASV1964	Saccharospirillum_ASV1964	Absence	Presence
1878	Unclassified_Cellvibrionaceae_1_ASV3007	Unclassified_Cellvibrionaceae_1_ASV3007	Absence	Presence
1879	Unclassified_Pseudomonadales_7_ASV4256	Unclassified_Pseudomonadales_7_ASV4256	Absence	Presence
1880	Pseudomonas_ASV1758	Pseudomonas_ASV1758	Absence	Presence
1881	Pseudomonas_ASV1775	Pseudomonas_ASV1775	Absence	Presence
1882	Pseudomonas_ASV1769	Pseudomonas_ASV1769	Absence	Presence
1883	Pseudomonas_ASV1772	Pseudomonas_ASV1772	Absence	Presence
1884	Pseudomonas_ASV1774	Pseudomonas_ASV1774	Absence	Presence
1885	Pseudomonas_ASV1753	Pseudomonas_ASV1753	Absence	Presence
1886	Pseudomonas_ASV1770	Pseudomonas_ASV1770	Absence	Presence
1887	Pseudomonas_ASV1763	Pseudomonas_ASV1763	Absence	Presence
1888	Pseudomonas_ASV1761	Pseudomonas_ASV1761	Absence	Presence
1889	Thiopseudomonas_ASV2362	Thiopseudomonas_ASV2362	Absence	Presence
1890	C1-B045_ASV385	C1-B045_ASV385	Absence	Presence
1891	Gilvimarinus_ASV1018	Gilvimarinus_ASV1018	Absence	Presence
1892	Cellvibrio_ASV504	Cellvibrio_ASV504	Absence	Presence
1893	Unclassified_Pseudomonadales_3_ASV4252	Unclassified_Pseudomonadales_3_ASV4252	Absence	Presence
1894	Unclassified_Pseudomonadales_6_ASV4255	Unclassified_Pseudomonadales_6_ASV4255	Absence	Presence
1895	Alteromonas_ASV169	Alteromonas_ASV169	Absence	Presence
1896	Unclassified_Steroidobacteraceae_1_ASV4799	Unclassified_Steroidobacteraceae_1_ASV4799	Absence	Presence
1897	Steroidobacter_ASV2232	Steroidobacter_ASV2232	Absence	Presence
1898	Acidibacter_ASV43	Acidibacter_ASV43	Absence	Presence
1899	Acidibacter_ASV45	Acidibacter_ASV45	Absence	Presence
1900	Unclassified_Gammaproteobacteria_51_ASV3508	Unclassified_Gammaproteobacteria_51_ASV3508	Absence	Presence
1901	Unclassified_Spongiibacteraceae_1_ASV4781	Unclassified_Spongiibacteraceae_1_ASV4781	Absence	Presence
1902	Unclassified_Spongiibacteraceae_2_ASV4782	Unclassified_Spongiibacteraceae_2_ASV4782	Absence	Presence
1903	Aeromonas_ASV103	Aeromonas_ASV103	Absence	Presence
1904	Gilliamella_ASV1015	Gilliamella_ASV1015	Absence	Presence
1905	Phocoenobacter_ASV1657	Phocoenobacter_ASV1657	Absence	Presence
1906	Haemophilus_ASV1040	Haemophilus_ASV1040	Absence	Presence
1907	Unclassified_Pasteurellaceae_8_ASV4053	Unclassified_Pasteurellaceae_8_ASV4053	Absence	Presence
1908	Unclassified_Pasteurellaceae_9_ASV4054	Unclassified_Pasteurellaceae_9_ASV4054	Absence	Presence
1909	Unclassified_Pasteurellaceae_11_ASV4046	Unclassified_Pasteurellaceae_11_ASV4046	Absence	Presence
1910	Pasteurella_ASV1606	Pasteurella_ASV1606	Absence	Presence
1911	Pasteurella_ASV1607	Pasteurella_ASV1607	Absence	Presence
1912	Providencia_ASV1734	Providencia_ASV1734	Absence	Presence
1913	Arsenophonus_ASV218	Arsenophonus_ASV218	Absence	Presence
1914	Arsenophonus_ASV217	Arsenophonus_ASV217	Absence	Presence
1915	Oceanospirillum_ASV1535	Oceanospirillum_ASV1535	Absence	Presence
1916	Idiomarina_ASV1123	Idiomarina_ASV1123	Absence	Presence
1917	Idiomarina_ASV1124	Idiomarina_ASV1124	Absence	Presence
1918	Shewanella_ASV2078	Shewanella_ASV2078	Absence	Presence
1919	Pseudoalteromonas_ASV1741	Pseudoalteromonas_ASV1741	Absence	Presence
1920	Oceanimonas_ASV1529	Oceanimonas_ASV1529	Absence	Presence
1921	Vibrio_ASV5054	Vibrio_ASV5054	Absence	Presence
1922	Vibrio_ASV5056	Vibrio_ASV5056	Absence	Presence
1923	Vibrio_ASV5062	Vibrio_ASV5062	Absence	Presence
1924	Vibrio_ASV5051	Vibrio_ASV5051	Absence	Presence
1925	Vibrio_ASV5061	Vibrio_ASV5061	Absence	Presence
1926	Vibrio_ASV5049	Vibrio_ASV5049	Absence	Presence
1927	Unclassified_Pectobacteriaceae_2_ASV4075	Unclassified_Pectobacteriaceae_2_ASV4075	Absence	Presence
1928	Unclassified_Pectobacteriaceae_1_ASV4074	Unclassified_Pectobacteriaceae_1_ASV4074	Absence	Presence
1929	Unclassified_Enterobacterales_6_ASV3325	Unclassified_Enterobacterales_6_ASV3325	Absence	Presence
1930	Unclassified_Yersiniaceae_2_ASV4970	Unclassified_Yersiniaceae_2_ASV4970	Absence	Presence
1931	Unclassified_Yersiniaceae_3_ASV4971	Unclassified_Yersiniaceae_3_ASV4971	Absence	Presence
1932	Plesiomonas_ASV1703	Plesiomonas_ASV1703	Absence	Presence
1933	Hafnia-Obesumbacterium_ASV1044	Hafnia-Obesumbacterium_ASV1044	Absence	Presence
1934	Escherichia-Shigella_ASV902	Escherichia-Shigella_ASV902	Absence	Presence
1935	Escherichia-Shigella_ASV890	Escherichia-Shigella_ASV890	Absence	Presence
1936	Escherichia-Shigella_ASV904	Escherichia-Shigella_ASV904	Absence	Presence
1937	Escherichia-Shigella_ASV897	Escherichia-Shigella_ASV897	Absence	Presence
1938	Escherichia-Shigella_ASV908	Escherichia-Shigella_ASV908	Absence	Presence
1939	Escherichia-Shigella_ASV892	Escherichia-Shigella_ASV892	Absence	Presence
1940	Escherichia-Shigella_ASV895	Escherichia-Shigella_ASV895	Absence	Presence
1941	Unclassified_Erwiniaceae_1_ASV3356	Unclassified_Erwiniaceae_1_ASV3356	Absence	Presence
1942	Unclassified_Enterobacterales_2_ASV3321	Unclassified_Enterobacterales_2_ASV3321	Absence	Presence
1943	Unclassified_Enterobacteriaceae_3_ASV3340	Unclassified_Enterobacteriaceae_3_ASV3340	Absence	Presence
1944	Unclassified_Erwiniaceae_7_ASV3362	Unclassified_Erwiniaceae_7_ASV3362	Absence	Presence
1945	Kosakonia_ASV1145	Kosakonia_ASV1145	Absence	Presence
1946	Unclassified_Enterobacteriaceae_10_ASV3327	Unclassified_Enterobacteriaceae_10_ASV3327	Absence	Presence
1947	Unclassified_Erwiniaceae_9_ASV3364	Unclassified_Erwiniaceae_9_ASV3364	Absence	Presence
1948	Unclassified_Erwiniaceae_4_ASV3359	Unclassified_Erwiniaceae_4_ASV3359	Absence	Presence
1949	Unclassified_Enterobacteriaceae_7_ASV3344	Unclassified_Enterobacteriaceae_7_ASV3344	Absence	Presence
1950	Serratia_ASV2075	Serratia_ASV2075	Absence	Presence
1951	Serratia_ASV2071	Serratia_ASV2071	Absence	Presence
1952	Unclassified_Morganellaceae_3_ASV3905	Unclassified_Morganellaceae_3_ASV3905	Absence	Presence
1953	Escherichia-Shigella_ASV891	Escherichia-Shigella_ASV891	Absence	Presence
1954	Unclassified_Gammaproteobacteria_30_ASV3485	Unclassified_Gammaproteobacteria_30_ASV3485	Absence	Presence
1955	Unclassified_Gammaproteobacteria_54_ASV3511	Unclassified_Gammaproteobacteria_54_ASV3511	Absence	Presence
1956	Unclassified_Gammaproteobacteria_13_ASV3466	Unclassified_Gammaproteobacteria_13_ASV3466	Absence	Presence
1957	Unclassified_Gammaproteobacteria_11_ASV3464	Unclassified_Gammaproteobacteria_11_ASV3464	Absence	Presence
1958	9M32_ASV22	9M32_ASV22	Absence	Presence
1959	Unclassified_Thiotrichaceae_1_ASV4859	Unclassified_Thiotrichaceae_1_ASV4859	Absence	Presence
1960	Psychrobacter_ASV1787	Psychrobacter_ASV1787	Absence	Presence
1961	Psychrobacter_ASV1783	Psychrobacter_ASV1783	Absence	Presence
1962	Acinetobacter_ASV53	Acinetobacter_ASV53	Absence	Presence
1963	Acinetobacter_ASV70	Acinetobacter_ASV70	Absence	Presence
1964	Acinetobacter_ASV62	Acinetobacter_ASV62	Absence	Presence
1965	Acinetobacter_ASV51	Acinetobacter_ASV51	Absence	Presence
1966	Acinetobacter_ASV65	Acinetobacter_ASV65	Absence	Presence
1967	Acinetobacter_ASV58	Acinetobacter_ASV58	Absence	Presence
1968	[Agitococcus]_lubricus_group_ASV1	[Agitococcus]_lubricus_group_ASV1	Absence	Presence
1969	Pseudohongiella_ASV1747	Pseudohongiella_ASV1747	Absence	Presence
1970	OM60(NOR5)_clade_ASV1549	OM60(NOR5)_clade_ASV1549	Absence	Presence
1971	Halioglobus_ASV1054	Halioglobus_ASV1054	Absence	Presence
1972	Unclassified_Halieaceae_5_ASV3602	Unclassified_Halieaceae_5_ASV3602	Absence	Presence
1973	Pseudohongiella_ASV1749	Pseudohongiella_ASV1749	Absence	Presence
1974	BD1-7_clade_ASV290	BD1-7_clade_ASV290	Absence	Presence
1975	BD1-7_clade_ASV293	BD1-7_clade_ASV293	Absence	Presence
1976	BD1-7_clade_ASV291	BD1-7_clade_ASV291	Absence	Presence
1977	Pseudohongiella_ASV1748	Pseudohongiella_ASV1748	Absence	Presence
1978	Unclassified_Pseudomonadales_1_ASV4250	Unclassified_Pseudomonadales_1_ASV4250	Absence	Presence
1979	Unclassified_OM182_clade_2_ASV3999	Unclassified_OM182_clade_2_ASV3999	Absence	Presence
1980	Unclassified_OM182_clade_1_ASV3998	Unclassified_OM182_clade_1_ASV3998	Absence	Presence
1981	Luminiphilus_ASV1275	Luminiphilus_ASV1275	Absence	Presence
1982	Unclassified_Halieaceae_1_ASV3598	Unclassified_Halieaceae_1_ASV3598	Absence	Presence
1983	Unclassified_Halieaceae_3_ASV3600	Unclassified_Halieaceae_3_ASV3600	Absence	Presence
1984	Unclassified_Halieaceae_2_ASV3599	Unclassified_Halieaceae_2_ASV3599	Absence	Presence
1985	BIyi10_ASV320	BIyi10_ASV320	Absence	Presence
1986	BIyi10_ASV321	BIyi10_ASV321	Absence	Presence
1987	Halomonas_ASV1065	Halomonas_ASV1065	Absence	Presence
1988	Halomonas_ASV1068	Halomonas_ASV1068	Absence	Presence
1989	Halomonas_ASV1076	Halomonas_ASV1076	Absence	Presence
1990	Halomonas_ASV1072	Halomonas_ASV1072	Absence	Presence
1991	Halomonas_ASV1069	Halomonas_ASV1069	Absence	Presence
1992	Halomonas_ASV1074	Halomonas_ASV1074	Absence	Presence
1993	Unclassified_Halomonadaceae_2_ASV3606	Unclassified_Halomonadaceae_2_ASV3606	Absence	Presence
1994	Halomonas_ASV1071	Halomonas_ASV1071	Absence	Presence
1995	Unclassified_Halomonadaceae_1_ASV3605	Unclassified_Halomonadaceae_1_ASV3605	Absence	Presence
1996	Unclassified_Halomonadaceae_3_ASV3607	Unclassified_Halomonadaceae_3_ASV3607	Absence	Presence
1997	Alcanivorax_ASV112	Alcanivorax_ASV112	Absence	Presence
1998	Unclassified_Nitrincolaceae_1_ASV3958	Unclassified_Nitrincolaceae_1_ASV3958	Absence	Presence
1999	Alcanivorax_ASV118	Alcanivorax_ASV118	Absence	Presence
[truncated: 333 more rows]

## Sheet: Structural_zero_male_tIgG_high
	Taxon	species	Low	High
1	Unclassified_Firmicutes_1_ASV3386	Unclassified_Firmicutes_1_ASV3386	Presence	Absence
2	Melioribacter_ASV1342	Melioribacter_ASV1342	Presence	Absence
3	Unclassified_MSB-3C8_ASV1412	Unclassified_MSB-3C8_ASV1412	Presence	Absence
4	Unclassified_Balneolaceae_18_ASV2766	Unclassified_Balneolaceae_18_ASV2766	Presence	Absence
5	Unclassified_Balneolaceae_52_ASV2804	Unclassified_Balneolaceae_52_ASV2804	Presence	Absence
6	Unclassified_Balneolaceae_58_ASV2810	Unclassified_Balneolaceae_58_ASV2810	Presence	Absence
7	Unclassified_Balneolaceae_68_ASV2821	Unclassified_Balneolaceae_68_ASV2821	Presence	Absence
8	Unclassified_Balneolaceae_79_ASV2833	Unclassified_Balneolaceae_79_ASV2833	Presence	Absence
9	Unclassified_Balneolaceae_77_ASV2831	Unclassified_Balneolaceae_77_ASV2831	Presence	Absence
10	Unclassified_Balneolaceae_57_ASV2809	Unclassified_Balneolaceae_57_ASV2809	Presence	Absence
11	Unclassified_Balneolaceae_41_ASV2792	Unclassified_Balneolaceae_41_ASV2792	Presence	Absence
12	Unclassified_Balneolaceae_72_ASV2826	Unclassified_Balneolaceae_72_ASV2826	Presence	Absence
13	Unclassified_Balneolaceae_74_ASV2828	Unclassified_Balneolaceae_74_ASV2828	Presence	Absence
14	Unclassified_Balneolaceae_30_ASV2780	Unclassified_Balneolaceae_30_ASV2780	Presence	Absence
15	Unclassified_Balneolaceae_28_ASV2777	Unclassified_Balneolaceae_28_ASV2777	Presence	Absence
16	Gracilimonas_ASV1027	Gracilimonas_ASV1027	Presence	Absence
17	Gracilimonas_ASV1028	Gracilimonas_ASV1028	Presence	Absence
18	Unclassified_Balneolaceae_23_ASV2772	Unclassified_Balneolaceae_23_ASV2772	Presence	Absence
19	Unclassified_Balneolaceae_3_ASV2779	Unclassified_Balneolaceae_3_ASV2779	Presence	Absence
20	Unclassified_Balneolaceae_8_ASV2834	Unclassified_Balneolaceae_8_ASV2834	Presence	Absence
21	Unclassified_Balneolaceae_9_ASV2838	Unclassified_Balneolaceae_9_ASV2838	Presence	Absence
22	Unclassified_Balneolaceae_45_ASV2796	Unclassified_Balneolaceae_45_ASV2796	Presence	Absence
23	Unclassified_Balneolaceae_20_ASV2769	Unclassified_Balneolaceae_20_ASV2769	Presence	Absence
24	Unclassified_Balneolaceae_24_ASV2773	Unclassified_Balneolaceae_24_ASV2773	Presence	Absence
25	Unclassified_Balneolaceae_46_ASV2797	Unclassified_Balneolaceae_46_ASV2797	Presence	Absence
26	Unclassified_Balneolaceae_54_ASV2806	Unclassified_Balneolaceae_54_ASV2806	Presence	Absence
27	Unclassified_Balneolaceae_25_ASV2774	Unclassified_Balneolaceae_25_ASV2774	Presence	Absence
28	Unclassified_Chitinophagales_2_ASV3035	Unclassified_Chitinophagales_2_ASV3035	Presence	Absence
29	Cryomorpha_ASV688	Cryomorpha_ASV688	Presence	Absence
30	Unclassified_Marinilabiliaceae_1_ASV3792	Unclassified_Marinilabiliaceae_1_ASV3792	Presence	Absence
31	Pedobacter_ASV1612	Pedobacter_ASV1612	Presence	Absence
32	Sphingobacterium_ASV2115	Sphingobacterium_ASV2115	Presence	Absence
33	Unclassified_Sphingobacteriaceae_3_ASV4744	Unclassified_Sphingobacteriaceae_3_ASV4744	Presence	Absence
34	Unclassified_Chitinophagales_8_ASV3041	Unclassified_Chitinophagales_8_ASV3041	Presence	Absence
35	Alistipes_ASV129	Alistipes_ASV129	Presence	Absence
36	Unclassified_Lentimicrobiaceae_14_ASV3756	Unclassified_Lentimicrobiaceae_14_ASV3756	Presence	Absence
37	Lentimicrobium_ASV1233	Lentimicrobium_ASV1233	Presence	Absence
38	Unclassified_env.OPS_17_ASV874	Unclassified_env.OPS_17_ASV874	Presence	Absence
39	Unclassified_Cryomorphaceae_1_ASV3145	Unclassified_Cryomorphaceae_1_ASV3145	Presence	Absence
40	Vicingus_ASV5064	Vicingus_ASV5064	Presence	Absence
41	Taibaiella_ASV2324	Taibaiella_ASV2324	Presence	Absence
42	Taibaiella_ASV2321	Taibaiella_ASV2321	Presence	Absence
43	Taibaiella_ASV2325	Taibaiella_ASV2325	Presence	Absence
44	Phaeodactylibacter_ASV1640	Phaeodactylibacter_ASV1640	Presence	Absence
45	Phaeodactylibacter_ASV1645	Phaeodactylibacter_ASV1645	Presence	Absence
46	Unclassified_Saprospiraceae_56_ASV4577	Unclassified_Saprospiraceae_56_ASV4577	Presence	Absence
47	Unclassified_Saprospiraceae_13_ASV4530	Unclassified_Saprospiraceae_13_ASV4530	Presence	Absence
48	Unclassified_Saprospiraceae_16_ASV4533	Unclassified_Saprospiraceae_16_ASV4533	Presence	Absence
49	Unclassified_Saprospiraceae_24_ASV4542	Unclassified_Saprospiraceae_24_ASV4542	Presence	Absence
50	Phaeodactylibacter_ASV1643	Phaeodactylibacter_ASV1643	Presence	Absence
51	Lewinella_ASV1262	Lewinella_ASV1262	Presence	Absence
52	Phaeodactylibacter_ASV1639	Phaeodactylibacter_ASV1639	Presence	Absence
53	Lewinella_ASV1263	Lewinella_ASV1263	Presence	Absence
54	Unclassified_Saprospiraceae_55_ASV4576	Unclassified_Saprospiraceae_55_ASV4576	Presence	Absence
55	Membranicola_ASV1345	Membranicola_ASV1345	Presence	Absence
56	Unclassified_Saprospiraceae_49_ASV4569	Unclassified_Saprospiraceae_49_ASV4569	Presence	Absence
57	Unclassified_Chitinophagaceae_8_ASV3031	Unclassified_Chitinophagaceae_8_ASV3031	Presence	Absence
58	Lacibacter_ASV1171	Lacibacter_ASV1171	Presence	Absence
59	Terrimonas_ASV2341	Terrimonas_ASV2341	Presence	Absence
60	Chitinophaga_ASV508	Chitinophaga_ASV508	Presence	Absence
61	Unclassified_Chitinophagaceae_10_ASV3011	Unclassified_Chitinophagaceae_10_ASV3011	Presence	Absence
62	Flavisolibacter_ASV935	Flavisolibacter_ASV935	Presence	Absence
63	Unclassified_Chitinophagaceae_16_ASV3017	Unclassified_Chitinophagaceae_16_ASV3017	Presence	Absence
64	Unclassified_Chitinophagaceae_23_ASV3025	Unclassified_Chitinophagaceae_23_ASV3025	Presence	Absence
65	Unclassified_Chitinophagaceae_17_ASV3018	Unclassified_Chitinophagaceae_17_ASV3018	Presence	Absence
66	Unclassified_Chitinophagaceae_15_ASV3016	Unclassified_Chitinophagaceae_15_ASV3016	Presence	Absence
67	Unclassified_Chitinophagaceae_3_ASV3026	Unclassified_Chitinophagaceae_3_ASV3026	Presence	Absence
68	Unclassified_Crocinitomicaceae_4_ASV3144	Unclassified_Crocinitomicaceae_4_ASV3144	Presence	Absence
69	Unclassified_Crocinitomicaceae_3_ASV3143	Unclassified_Crocinitomicaceae_3_ASV3143	Presence	Absence
70	Unclassified_Crocinitomicaceae_2_ASV3142	Unclassified_Crocinitomicaceae_2_ASV3142	Presence	Absence
71	Unclassified_Crocinitomicaceae_1_ASV3141	Unclassified_Crocinitomicaceae_1_ASV3141	Presence	Absence
72	Brumimicrobium_ASV376	Brumimicrobium_ASV376	Presence	Absence
73	Unclassified_NS11-12_marine_group_1_ASV3985	Unclassified_NS11-12_marine_group_1_ASV3985	Presence	Absence
74	Unclassified_Bacteroidia_5_ASV2755	Unclassified_Bacteroidia_5_ASV2755	Presence	Absence
75	Unclassified_Bacteroidetes_vadinHA17_1_ASV2749	Unclassified_Bacteroidetes_vadinHA17_1_ASV2749	Presence	Absence
76	Unclassified_Bacteroidales_10_ASV2710	Unclassified_Bacteroidales_10_ASV2710	Presence	Absence
77	Unclassified_Bacteroidetes_BD2-2_7_ASV2746	Unclassified_Bacteroidetes_BD2-2_7_ASV2746	Presence	Absence
78	Unclassified_Bacteroidetes_BD2-2_16_ASV2731	Unclassified_Bacteroidetes_BD2-2_16_ASV2731	Presence	Absence
79	Roseimarinus_ASV1904	Roseimarinus_ASV1904	Presence	Absence
80	Unclassified_Prolixibacteraceae_9_ASV4242	Unclassified_Prolixibacteraceae_9_ASV4242	Presence	Absence
81	Unclassified_Prolixibacteraceae_1_ASV4233	Unclassified_Prolixibacteraceae_1_ASV4233	Presence	Absence
82	Unclassified_Prolixibacteraceae_3_ASV4236	Unclassified_Prolixibacteraceae_3_ASV4236	Presence	Absence
83	Unclassified_Prolixibacteraceae_4_ASV4237	Unclassified_Prolixibacteraceae_4_ASV4237	Presence	Absence
84	Draconibacterium_ASV851	Draconibacterium_ASV851	Presence	Absence
85	Draconibacterium_ASV850	Draconibacterium_ASV850	Presence	Absence
86	Unclassified_Prolixibacteraceae_10_ASV4234	Unclassified_Prolixibacteraceae_10_ASV4234	Presence	Absence
87	Unclassified_Bacteroidetes_BD2-2_22_ASV2738	Unclassified_Bacteroidetes_BD2-2_22_ASV2738	Presence	Absence
88	Robiginitalea_ASV1889	Robiginitalea_ASV1889	Presence	Absence
89	Muricauda_ASV1415	Muricauda_ASV1415	Presence	Absence
90	Unclassified_Flavobacteriaceae_6_ASV3447	Unclassified_Flavobacteriaceae_6_ASV3447	Presence	Absence
91	Unclassified_Flavobacteriaceae_50_ASV3437	Unclassified_Flavobacteriaceae_50_ASV3437	Presence	Absence
92	Unclassified_Flavobacteriaceae_5_ASV3436	Unclassified_Flavobacteriaceae_5_ASV3436	Presence	Absence
93	Unclassified_Flavobacteriaceae_43_ASV3429	Unclassified_Flavobacteriaceae_43_ASV3429	Presence	Absence
94	Unclassified_Flavobacteriaceae_55_ASV3442	Unclassified_Flavobacteriaceae_55_ASV3442	Presence	Absence
95	Unclassified_Flavobacteriaceae_54_ASV3441	Unclassified_Flavobacteriaceae_54_ASV3441	Presence	Absence
96	Unclassified_Flavobacteriaceae_51_ASV3438	Unclassified_Flavobacteriaceae_51_ASV3438	Presence	Absence
97	Psychroflexus_ASV1789	Psychroflexus_ASV1789	Presence	Absence
98	Unclassified_Flavobacteriaceae_34_ASV3419	Unclassified_Flavobacteriaceae_34_ASV3419	Presence	Absence
99	Gramella_ASV1034	Gramella_ASV1034	Presence	Absence
100	Unclassified_Flavobacteriaceae_52_ASV3439	Unclassified_Flavobacteriaceae_52_ASV3439	Presence	Absence
101	NS5_marine_group_ASV1519	NS5_marine_group_ASV1519	Presence	Absence
102	Unclassified_Flavobacteriaceae_16_ASV3399	Unclassified_Flavobacteriaceae_16_ASV3399	Presence	Absence
103	Unclassified_Flavobacteriaceae_36_ASV3421	Unclassified_Flavobacteriaceae_36_ASV3421	Presence	Absence
104	Unclassified_Flavobacteriaceae_47_ASV3433	Unclassified_Flavobacteriaceae_47_ASV3433	Presence	Absence
105	Unclassified_Flavobacteriaceae_41_ASV3427	Unclassified_Flavobacteriaceae_41_ASV3427	Presence	Absence
106	Unclassified_Flavobacteriaceae_28_ASV3412	Unclassified_Flavobacteriaceae_28_ASV3412	Presence	Absence
107	Unclassified_Flavobacteriaceae_13_ASV3396	Unclassified_Flavobacteriaceae_13_ASV3396	Presence	Absence
108	Unclassified_Weeksellaceae_12_ASV4933	Unclassified_Weeksellaceae_12_ASV4933	Presence	Absence
109	Unclassified_Weeksellaceae_7_ASV4940	Unclassified_Weeksellaceae_7_ASV4940	Presence	Absence
110	Chryseobacterium_ASV548	Chryseobacterium_ASV548	Presence	Absence
111	Bergeyella_ASV314	Bergeyella_ASV314	Presence	Absence
112	Unclassified_Weeksellaceae_13_ASV4934	Unclassified_Weeksellaceae_13_ASV4934	Presence	Absence
113	Apibacter_ASV195	Apibacter_ASV195	Presence	Absence
114	Flavobacterium_ASV950	Flavobacterium_ASV950	Presence	Absence
115	Unclassified_Flavobacteriaceae_58_ASV3445	Unclassified_Flavobacteriaceae_58_ASV3445	Presence	Absence
116	Lutibacter_ASV1292	Lutibacter_ASV1292	Presence	Absence
117	Anaerophaga_ASV193	Anaerophaga_ASV193	Presence	Absence
118	Mangroviflexus_ASV1300	Mangroviflexus_ASV1300	Presence	Absence
119	Porphyromonas_ASV1710	Porphyromonas_ASV1710	Presence	Absence
120	Alloprevotella_ASV137	Alloprevotella_ASV137	Presence	Absence
121	Prevotella_7_ASV1715	Prevotella_7_ASV1715	Presence	Absence
122	Parabacteroides_ASV1587	Parabacteroides_ASV1587	Presence	Absence
123	Bacteroides_ASV269	Bacteroides_ASV269	Presence	Absence
124	Unclassified_Cytophagales_9_ASV3214	Unclassified_Cytophagales_9_ASV3214	Presence	Absence
125	Hymenobacter_ASV1104	Hymenobacter_ASV1104	Presence	Absence
126	Hymenobacter_ASV1101	Hymenobacter_ASV1101	Presence	Absence
127	Hymenobacter_ASV1107	Hymenobacter_ASV1107	Presence	Absence
128	Adhaeribacter_ASV89	Adhaeribacter_ASV89	Presence	Absence
129	Algoriphagus_ASV122	Algoriphagus_ASV122	Presence	Absence
130	Algoriphagus_ASV121	Algoriphagus_ASV121	Presence	Absence
131	Algoriphagus_ASV124	Algoriphagus_ASV124	Presence	Absence
132	Unclassified_Spirosomaceae_3_ASV4780	Unclassified_Spirosomaceae_3_ASV4780	Presence	Absence
133	Larkinella_ASV1186	Larkinella_ASV1186	Presence	Absence
134	Larkinella_ASV1185	Larkinella_ASV1185	Presence	Absence
135	Spirosoma_ASV2213	Spirosoma_ASV2213	Presence	Absence
136	Unclassified_Cyclobacteriaceae_13_ASV3176	Unclassified_Cyclobacteriaceae_13_ASV3176	Presence	Absence
137	Unclassified_Cyclobacteriaceae_12_ASV3175	Unclassified_Cyclobacteriaceae_12_ASV3175	Presence	Absence
138	Catalinimonas_ASV497	Catalinimonas_ASV497	Presence	Absence
139	Unclassified_Cyclobacteriaceae_11_ASV3174	Unclassified_Cyclobacteriaceae_11_ASV3174	Presence	Absence
140	Unclassified_Rhodothermaceae_11_ASV4461	Unclassified_Rhodothermaceae_11_ASV4461	Presence	Absence
141	Unclassified_Rhodothermaceae_20_ASV4471	Unclassified_Rhodothermaceae_20_ASV4471	Presence	Absence
142	Salinibacter_ASV1985	Salinibacter_ASV1985	Presence	Absence
143	Unclassified_Zixibacteria_17_ASV4981	Unclassified_Zixibacteria_17_ASV4981	Presence	Absence
144	Unclassified_Zixibacteria_8_ASV5000	Unclassified_Zixibacteria_8_ASV5000	Presence	Absence
145	Unclassified_Omnitrophales_1_ASV4015	Unclassified_Omnitrophales_1_ASV4015	Presence	Absence
146	Unclassified_Latescibacterota_5_ASV3740	Unclassified_Latescibacterota_5_ASV3740	Presence	Absence
147	Candidatus_Omnitrophus_ASV460	Candidatus_Omnitrophus_ASV460	Presence	Absence
148	Treponema_ASV2376	Treponema_ASV2376	Presence	Absence
149	Spirochaeta_2_ASV2209	Spirochaeta_2_ASV2209	Presence	Absence
150	Sphaerochaeta_ASV2111	Sphaerochaeta_ASV2111	Presence	Absence
151	Sediminispirochaeta_ASV2062	Sediminispirochaeta_ASV2062	Presence	Absence
152	Candidatus_Marispirochaeta_ASV442	Candidatus_Marispirochaeta_ASV442	Presence	Absence
153	Sediminispirochaeta_ASV2058	Sediminispirochaeta_ASV2058	Presence	Absence
154	Sediminispirochaeta_ASV2055	Sediminispirochaeta_ASV2055	Presence	Absence
155	Spirochaeta_2_ASV2193	Spirochaeta_2_ASV2193	Presence	Absence
156	Spirochaeta_2_ASV2183	Spirochaeta_2_ASV2183	Presence	Absence
157	Unclassified_Parachlamydiaceae_3_ASV4024	Unclassified_Parachlamydiaceae_3_ASV4024	Presence	Absence
158	Unclassified_Parachlamydiaceae_2_ASV4023	Unclassified_Parachlamydiaceae_2_ASV4023	Presence	Absence
159	Unclassified_OM190_6_ASV4011	Unclassified_OM190_6_ASV4011	Presence	Absence
160	Unclassified_Pla4_lineage_6_ASV4179	Unclassified_Pla4_lineage_6_ASV4179	Presence	Absence
161	Urania-1B-19_marine_sediment_group_ASV5023	Urania-1B-19_marine_sediment_group_ASV5023	Presence	Absence
162	Unclassified_WD2101_soil_group_7_ASV4928	Unclassified_WD2101_soil_group_7_ASV4928	Presence	Absence
163	Unclassified_WD2101_soil_group_8_ASV4929	Unclassified_WD2101_soil_group_8_ASV4929	Presence	Absence
164	Unclassified_Tepidisphaeraceae_ASV2329	Unclassified_Tepidisphaeraceae_ASV2329	Presence	Absence
165	Algisphaera_ASV119	Algisphaera_ASV119	Presence	Absence
166	Unclassified_Phycisphaeraceae_14_ASV4108	Unclassified_Phycisphaeraceae_14_ASV4108	Presence	Absence
167	Unclassified_Gemmataceae_4_ASV3565	Unclassified_Gemmataceae_4_ASV3565	Presence	Absence
168	Unclassified_Gemmataceae_2_ASV3563	Unclassified_Gemmataceae_2_ASV3563	Presence	Absence
169	Unclassified_Gemmataceae_6_ASV3567	Unclassified_Gemmataceae_6_ASV3567	Presence	Absence
170	Unclassified_Isosphaeraceae_2_ASV3644	Unclassified_Isosphaeraceae_2_ASV3644	Presence	Absence
171	Paludisphaera_ASV1583	Paludisphaera_ASV1583	Presence	Absence
172	Fimbriiglobus_ASV925	Fimbriiglobus_ASV925	Presence	Absence
173	Fimbriiglobus_ASV922	Fimbriiglobus_ASV922	Presence	Absence
174	Fimbriiglobus_ASV923	Fimbriiglobus_ASV923	Presence	Absence
175	Gemmata_ASV999	Gemmata_ASV999	Presence	Absence
176	Unclassified_Planctomycetales_8_ASV4200	Unclassified_Planctomycetales_8_ASV4200	Presence	Absence
177	Unclassified_Planctomycetales_14_ASV4188	Unclassified_Planctomycetales_14_ASV4188	Presence	Absence
178	Unclassified_Planctomycetales_3_ASV4195	Unclassified_Planctomycetales_3_ASV4195	Presence	Absence
179	Unclassified_Planctomycetales_2_ASV4194	Unclassified_Planctomycetales_2_ASV4194	Presence	Absence
180	Planctopirus_ASV1699	Planctopirus_ASV1699	Presence	Absence
181	Unclassified_Planctomycetales_12_ASV4186	Unclassified_Planctomycetales_12_ASV4186	Presence	Absence
182	Pir4_lineage_ASV1683	Pir4_lineage_ASV1683	Presence	Absence
183	Unclassified_Pirellulaceae_13_ASV4129	Unclassified_Pirellulaceae_13_ASV4129	Presence	Absence
184	Unclassified_BD7-11_1_ASV2871	Unclassified_BD7-11_1_ASV2871	Presence	Absence
185	Unclassified_Vicinamibacterales_1_ASV4904	Unclassified_Vicinamibacterales_1_ASV4904	Presence	Absence
186	Unclassified_Vicinamibacterales_2_ASV4905	Unclassified_Vicinamibacterales_2_ASV4905	Presence	Absence
187	Verruc-01_ASV5041	Verruc-01_ASV5041	Presence	Absence
188	Verruc-01_ASV5046	Verruc-01_ASV5046	Presence	Absence
189	Unclassified_Vicinamibacterales_4_ASV4907	Unclassified_Vicinamibacterales_4_ASV4907	Presence	Absence
190	Unclassified_SS1-B-02-17_7_ASV4792	Unclassified_SS1-B-02-17_7_ASV4792	Presence	Absence
191	Unclassified_SS1-B-02-17_3_ASV4788	Unclassified_SS1-B-02-17_3_ASV4788	Presence	Absence
192	Unclassified_Methylacidiphilaceae_2_ASV3828	Unclassified_Methylacidiphilaceae_2_ASV3828	Presence	Absence
193	Unclassified_Pedosphaeraceae_1_ASV4076	Unclassified_Pedosphaeraceae_1_ASV4076	Presence	Absence
194	Luteolibacter_ASV1286	Luteolibacter_ASV1286	Presence	Absence
195	Luteolibacter_ASV1284	Luteolibacter_ASV1284	Presence	Absence
196	Roseibacillus_ASV1902	Roseibacillus_ASV1902	Presence	Absence
197	Prosthecobacter_ASV1728	Prosthecobacter_ASV1728	Presence	Absence
198	Chthoniobacter_ASV554	Chthoniobacter_ASV554	Presence	Absence
199	Chthoniobacter_ASV552	Chthoniobacter_ASV552	Presence	Absence
200	Terrimicrobium_ASV2339	Terrimicrobium_ASV2339	Presence	Absence
201	Terrimicrobium_ASV2338	Terrimicrobium_ASV2338	Presence	Absence
202	Candidatus_Xiphinematobacter_ASV489	Candidatus_Xiphinematobacter_ASV489	Presence	Absence
203	Candidatus_Udaeobacter_ASV485	Candidatus_Udaeobacter_ASV485	Presence	Absence
204	Unclassified_Subgroup_22_2_ASV4805	Unclassified_Subgroup_22_2_ASV4805	Presence	Absence
205	Unclassified_SAR324_clade(Marine_group_B)_12_ASV4592	Unclassified_SAR324_clade(Marine_group_B)_12_ASV4592	Presence	Absence
206	RB41_ASV1805	RB41_ASV1805	Presence	Absence
207	Unclassified_Blastocatellaceae_2_ASV2913	Unclassified_Blastocatellaceae_2_ASV2913	Presence	Absence
208	Unclassified_Blastocatellaceae_6_ASV2917	Unclassified_Blastocatellaceae_6_ASV2917	Presence	Absence
209	Blastocatella_ASV322	Blastocatella_ASV322	Presence	Absence
210	Unclassified_Blastocatellaceae_7_ASV2918	Unclassified_Blastocatellaceae_7_ASV2918	Presence	Absence
211	Unclassified_C0119_2_ASV2962	Unclassified_C0119_2_ASV2962	Presence	Absence
212	Unclassified_Gitt-GS-136_2_ASV3590	Unclassified_Gitt-GS-136_2_ASV3590	Presence	Absence
213	Unclassified_JG30-KF-CM66_2_ASV3662	Unclassified_JG30-KF-CM66_2_ASV3662	Presence	Absence
214	Unclassified_S085_2_ASV4508	Unclassified_S085_2_ASV4508	Presence	Absence
215	Unclassified_SBR1031_3_ASV4648	Unclassified_SBR1031_3_ASV4648	Presence	Absence
216	Unclassified_A4b_15_ASV2436	Unclassified_A4b_15_ASV2436	Presence	Absence
217	Unclassified_A4b_20_ASV2442	Unclassified_A4b_20_ASV2442	Presence	Absence
218	Unclassified_SBR1031_49_ASV4669	Unclassified_SBR1031_49_ASV4669	Presence	Absence
219	Unclassified_SBR1031_32_ASV4651	Unclassified_SBR1031_32_ASV4651	Presence	Absence
220	Unclassified_SBR1031_70_ASV4693	Unclassified_SBR1031_70_ASV4693	Presence	Absence
221	Unclassified_SBR1031_67_ASV4689	Unclassified_SBR1031_67_ASV4689	Presence	Absence
222	Unclassified_SBR1031_53_ASV4674	Unclassified_SBR1031_53_ASV4674	Presence	Absence
223	Unclassified_Anaerolineaceae_25_ASV2602	Unclassified_Anaerolineaceae_25_ASV2602	Presence	Absence
224	Unclassified_Anaerolineaceae_11_ASV2587	Unclassified_Anaerolineaceae_11_ASV2587	Presence	Absence
225	Unclassified_Anaerolineaceae_19_ASV2595	Unclassified_Anaerolineaceae_19_ASV2595	Presence	Absence
226	Unclassified_Anaerolineaceae_13_ASV2589	Unclassified_Anaerolineaceae_13_ASV2589	Presence	Absence
227	Unclassified_Anaerolineaceae_36_ASV2614	Unclassified_Anaerolineaceae_36_ASV2614	Presence	Absence
228	Unclassified_C0119_1_ASV2961	Unclassified_C0119_1_ASV2961	Presence	Absence
229	Bryobacter_ASV379	Bryobacter_ASV379	Presence	Absence
230	Unclassified_IMCC26256_2_ASV3641	Unclassified_IMCC26256_2_ASV3641	Presence	Absence
231	Iamia_ASV1122	Iamia_ASV1122	Presence	Absence
232	Unclassified_Ilumatobacteraceae_1_ASV3638	Unclassified_Ilumatobacteraceae_1_ASV3638	Presence	Absence
233	Unclassified_Actinomarinales_7_ASV2510	Unclassified_Actinomarinales_7_ASV2510	Presence	Absence
234	Unclassified_Nocardioidaceae_2_ASV3978	Unclassified_Nocardioidaceae_2_ASV3978	Presence	Absence
235	Aeromicrobium_ASV100	Aeromicrobium_ASV100	Presence	Absence
236	Nocardioides_ASV1499	Nocardioides_ASV1499	Presence	Absence
237	Nocardioides_ASV1502	Nocardioides_ASV1502	Presence	Absence
238	Unclassified_PeM15_1_ASV4083	Unclassified_PeM15_1_ASV4083	Presence	Absence
239	Unclassified_Actinobacteriota_2_ASV2497	Unclassified_Actinobacteriota_2_ASV2497	Presence	Absence
240	Nakamurella_ASV1461	Nakamurella_ASV1461	Presence	Absence
241	Unclassified_Pseudonocardiaceae_5_ASV4262	Unclassified_Pseudonocardiaceae_5_ASV4262	Presence	Absence
242	Saccharopolyspora_ASV1960	Saccharopolyspora_ASV1960	Presence	Absence
243	Unclassified_Pseudonocardiaceae_3_ASV4260	Unclassified_Pseudonocardiaceae_3_ASV4260	Presence	Absence
244	Pseudonocardia_ASV1779	Pseudonocardia_ASV1779	Presence	Absence
245	Rhodococcus_ASV1830	Rhodococcus_ASV1830	Presence	Absence
246	Dietzia_ASV841	Dietzia_ASV841	Presence	Absence
247	Corynebacterium_ASV668	Corynebacterium_ASV668	Presence	Absence
248	Corynebacterium_ASV657	Corynebacterium_ASV657	Presence	Absence
249	Corynebacterium_ASV655	Corynebacterium_ASV655	Presence	Absence
250	Corynebacterium_ASV661	Corynebacterium_ASV661	Presence	Absence
251	Corynebacterium_ASV654	Corynebacterium_ASV654	Presence	Absence
252	Unclassified_Corynebacteriaceae_1_ASV3139	Unclassified_Corynebacteriaceae_1_ASV3139	Presence	Absence
253	Mycobacterium_ASV1433	Mycobacterium_ASV1433	Presence	Absence
254	Mycobacterium_ASV1432	Mycobacterium_ASV1432	Presence	Absence
255	Mycobacterium_ASV1434	Mycobacterium_ASV1434	Presence	Absence
256	Mycobacterium_ASV1435	Mycobacterium_ASV1435	Presence	Absence
257	Micromonospora_ASV1396	Micromonospora_ASV1396	Presence	Absence
258	Unclassified_Microbacteriaceae_5_ASV3850	Unclassified_Microbacteriaceae_5_ASV3850	Presence	Absence
259	Unclassified_Microbacteriaceae_1_ASV3843	Unclassified_Microbacteriaceae_1_ASV3843	Presence	Absence
260	Cellulomonas_ASV500	Cellulomonas_ASV500	Presence	Absence
261	Unclassified_Microbacteriaceae_11_ASV3845	Unclassified_Microbacteriaceae_11_ASV3845	Presence	Absence
262	Unclassified_Microbacteriaceae_12_ASV3846	Unclassified_Microbacteriaceae_12_ASV3846	Presence	Absence
263	Unclassified_Microbacteriaceae_9_ASV3854	Unclassified_Microbacteriaceae_9_ASV3854	Presence	Absence
264	Unclassified_Micrococcales_6_ASV3866	Unclassified_Micrococcales_6_ASV3866	Presence	Absence
265	Flaviflexus_ASV933	Flaviflexus_ASV933	Presence	Absence
266	Flaviflexus_ASV932	Flaviflexus_ASV932	Presence	Absence
267	Unclassified_Cellulomonadaceae_2_ASV3006	Unclassified_Cellulomonadaceae_2_ASV3006	Presence	Absence
268	Unclassified_Dermacoccaceae_1_ASV3231	Unclassified_Dermacoccaceae_1_ASV3231	Presence	Absence
269	Unclassified_Bifidobacteriaceae_1_ASV2904	Unclassified_Bifidobacteriaceae_1_ASV2904	Presence	Absence
270	Kocuria_ASV1140	Kocuria_ASV1140	Presence	Absence
271	Unclassified_Micrococcaceae_1_ASV3855	Unclassified_Micrococcaceae_1_ASV3855	Presence	Absence
272	Unclassified_Micrococcaceae_3_ASV3857	Unclassified_Micrococcaceae_3_ASV3857	Presence	Absence
273	Unclassified_Micrococcaceae_6_ASV3860	Unclassified_Micrococcaceae_6_ASV3860	Presence	Absence
274	Arthrobacter_ASV221	Arthrobacter_ASV221	Presence	Absence
275	Kocuria_ASV1141	Kocuria_ASV1141	Presence	Absence
276	Actinomadura_ASV74	Actinomadura_ASV74	Presence	Absence
277	Conexibacter_ASV643	Conexibacter_ASV643	Presence	Absence
278	Gaiella_ASV982	Gaiella_ASV982	Presence	Absence
279	Unclassified_Longimicrobiaceae_2_ASV3788	Unclassified_Longimicrobiaceae_2_ASV3788	Presence	Absence
280	Unclassified_BD2-11_terrestrial_group_16_ASV2846	Unclassified_BD2-11_terrestrial_group_16_ASV2846	Presence	Absence
281	Unclassified_BD2-11_terrestrial_group_14_ASV2844	Unclassified_BD2-11_terrestrial_group_14_ASV2844	Presence	Absence
282	Unclassified_S0134_terrestrial_group_ASV1955	Unclassified_S0134_terrestrial_group_ASV1955	Presence	Absence
283	Unclassified_Bacillales_4_ASV2697	Unclassified_Bacillales_4_ASV2697	Presence	Absence
284	Caldithrix_ASV387	Caldithrix_ASV387	Presence	Absence
285	Caldithrix_ASV390	Caldithrix_ASV390	Presence	Absence
286	Unclassified_Calditrichaceae_8_ASV2980	Unclassified_Calditrichaceae_8_ASV2980	Presence	Absence
287	Candidatus_Electrothrix_ASV433	Candidatus_Electrothrix_ASV433	Presence	Absence
288	Unclassified_Desulfocapsaceae_5_ASV3254	Unclassified_Desulfocapsaceae_5_ASV3254	Presence	Absence
289	Desulfofustis_ASV784	Desulfofustis_ASV784	Presence	Absence
290	Desulfofustis_ASV785	Desulfofustis_ASV785	Presence	Absence
291	Unclassified_Desulfocapsaceae_2_ASV3251	Unclassified_Desulfocapsaceae_2_ASV3251	Presence	Absence
292	Desulfatiglans_ASV745	Desulfatiglans_ASV745	Presence	Absence
293	Unclassified_Myxococcales_1_ASV3916	Unclassified_Myxococcales_1_ASV3916	Presence	Absence
294	Unclassified_PS-B29_1_ASV4245	Unclassified_PS-B29_1_ASV4245	Presence	Absence
295	Unclassified_Blfdi19_ASV343	Unclassified_Blfdi19_ASV343	Presence	Absence
296	P3OB-42_ASV1562	P3OB-42_ASV1562	Presence	Absence
297	P3OB-42_ASV1567	P3OB-42_ASV1567	Presence	Absence
298	Cystobacter_ASV714	Cystobacter_ASV714	Presence	Absence
299	Unclassified_Sandaracinaceae_9_ASV4525	Unclassified_Sandaracinaceae_9_ASV4525	Presence	Absence
300	Unclassified_Sandaracinaceae_8_ASV4524	Unclassified_Sandaracinaceae_8_ASV4524	Presence	Absence
301	Sandaracinus_ASV2034	Sandaracinus_ASV2034	Presence	Absence
302	Unclassified_NB1-j_9_ASV3944	Unclassified_NB1-j_9_ASV3944	Presence	Absence
303	Unclassified_NB1-j_12_ASV3926	Unclassified_NB1-j_12_ASV3926	Presence	Absence
304	Unclassified_Polyangiaceae_1_ASV4228	Unclassified_Polyangiaceae_1_ASV4228	Presence	Absence
305	Unclassified_BIrii41_3_ASV2907	Unclassified_BIrii41_3_ASV2907	Presence	Absence
306	Unclassified_BIrii41_7_ASV2911	Unclassified_BIrii41_7_ASV2911	Presence	Absence
307	Unclassified_BIrii41_2_ASV2906	Unclassified_BIrii41_2_ASV2906	Presence	Absence
308	Pajaroellobacter_ASV1579	Pajaroellobacter_ASV1579	Presence	Absence
309	SWB02_ASV2309	SWB02_ASV2309	Presence	Absence
310	Unclassified_Rhizobiales_3_ASV4325	Unclassified_Rhizobiales_3_ASV4325	Presence	Absence
311	SWB02_ASV2302	SWB02_ASV2302	Presence	Absence
312	SWB02_ASV2303	SWB02_ASV2303	Presence	Absence
313	SWB02_ASV2305	SWB02_ASV2305	Presence	Absence
314	SWB02_ASV2307	SWB02_ASV2307	Presence	Absence
315	Unclassified_Hyphomonadaceae_3_ASV3631	Unclassified_Hyphomonadaceae_3_ASV3631	Presence	Absence
316	Rickettsia_ASV1875	Rickettsia_ASV1875	Presence	Absence
317	Parvularcula_ASV1605	Parvularcula_ASV1605	Presence	Absence
318	Limibaculum_ASV1267	Limibaculum_ASV1267	Presence	Absence
319	Candidatus_Alysiosphaera_ASV406	Candidatus_Alysiosphaera_ASV406	Presence	Absence
320	Unclassified_Alphaproteobacteria_2_ASV2552	Unclassified_Alphaproteobacteria_2_ASV2552	Presence	Absence
321	Unclassified_0319-6G20_1_ASV2419	Unclassified_0319-6G20_1_ASV2419	Presence	Absence
322	Bartonella_ASV286	Bartonella_ASV286	Presence	Absence
323	Bartonella_ASV285	Bartonella_ASV285	Presence	Absence
324	Unclassified_Rhizobiaceae_28_ASV4313	Unclassified_Rhizobiaceae_28_ASV4313	Presence	Absence
325	Unclassified_Hyphomonadaceae_11_ASV3629	Unclassified_Hyphomonadaceae_11_ASV3629	Presence	Absence
326	Unclassified_Rhodobacteraceae_100_ASV4347	Unclassified_Rhodobacteraceae_100_ASV4347	Presence	Absence
327	Unclassified_D05-2_2_ASV3216	Unclassified_D05-2_2_ASV3216	Presence	Absence
328	Unclassified_Rhodobacteraceae_97_ASV4444	Unclassified_Rhodobacteraceae_97_ASV4444	Presence	Absence
329	Aureimonas_ASV240	Aureimonas_ASV240	Presence	Absence
330	Allorhizobium-Neorhizobium-Pararhizobium-Rhizobium_ASV141	Allorhizobium-Neorhizobium-Pararhizobium-Rhizobium_ASV141	Presence	Absence
331	Allorhizobium-Neorhizobium-Pararhizobium-Rhizobium_ASV156	Allorhizobium-Neorhizobium-Pararhizobium-Rhizobium_ASV156	Presence	Absence
332	Allorhizobium-Neorhizobium-Pararhizobium-Rhizobium_ASV159	Allorhizobium-Neorhizobium-Pararhizobium-Rhizobium_ASV159	Presence	Absence
333	Allorhizobium-Neorhizobium-Pararhizobium-Rhizobium_ASV148	Allorhizobium-Neorhizobium-Pararhizobium-Rhizobium_ASV148	Presence	Absence
334	Allorhizobium-Neorhizobium-Pararhizobium-Rhizobium_ASV144	Allorhizobium-Neorhizobium-Pararhizobium-Rhizobium_ASV144	Presence	Absence
335	Bartonella_ASV287	Bartonella_ASV287	Presence	Absence
336	Unclassified_Rhizobiales_9_ASV4331	Unclassified_Rhizobiales_9_ASV4331	Presence	Absence
337	Hyphomonas_ASV1120	Hyphomonas_ASV1120	Presence	Absence
338	Unclassified_Rhodobacteraceae_46_ASV4388	Unclassified_Rhodobacteraceae_46_ASV4388	Presence	Absence
339	Unclassified_Rhodobacteraceae_8_ASV4425	Unclassified_Rhodobacteraceae_8_ASV4425	Presence	Absence
340	Rhodomicrobium_ASV1845	Rhodomicrobium_ASV1845	Presence	Absence
341	Unclassified_Methyloligellaceae_1_ASV3833	Unclassified_Methyloligellaceae_1_ASV3833	Presence	Absence
342	Asticcacaulis_ASV227	Asticcacaulis_ASV227	Presence	Absence
343	Caulobacter_ASV498	Caulobacter_ASV498	Presence	Absence
344	Methylobacterium-Methylorubrum_ASV1370	Methylobacterium-Methylorubrum_ASV1370	Presence	Absence
345	Methylobacterium-Methylorubrum_ASV1365	Methylobacterium-Methylorubrum_ASV1365	Presence	Absence
346	Methylobacterium-Methylorubrum_ASV1362	Methylobacterium-Methylorubrum_ASV1362	Presence	Absence
347	Unclassified_Beijerinckiaceae_25_ASV2894	Unclassified_Beijerinckiaceae_25_ASV2894	Presence	Absence
348	Unclassified_Beijerinckiaceae_21_ASV2890	Unclassified_Beijerinckiaceae_21_ASV2890	Presence	Absence
349	Methylobacterium-Methylorubrum_ASV1366	Methylobacterium-Methylorubrum_ASV1366	Presence	Absence
350	Methylobacterium-Methylorubrum_ASV1360	Methylobacterium-Methylorubrum_ASV1360	Presence	Absence
351	Unclassified_Beijerinckiaceae_7_ASV2900	Unclassified_Beijerinckiaceae_7_ASV2900	Presence	Absence
352	Unclassified_Beijerinckiaceae_16_ASV2884	Unclassified_Beijerinckiaceae_16_ASV2884	Presence	Absence
353	Microvirga_ASV1400	Microvirga_ASV1400	Presence	Absence
354	Phreatobacter_ASV1675	Phreatobacter_ASV1675	Presence	Absence
355	Labrys_ASV1149	Labrys_ASV1149	Presence	Absence
356	Rhodopseudomonas_ASV1865	Rhodopseudomonas_ASV1865	Presence	Absence
357	Rhodomicrobium_ASV1844	Rhodomicrobium_ASV1844	Presence	Absence
358	Devosia_ASV833	Devosia_ASV833	Presence	Absence
359	Devosia_ASV836	Devosia_ASV836	Presence	Absence
360	Devosia_ASV835	Devosia_ASV835	Presence	Absence
361	Devosia_ASV830	Devosia_ASV830	Presence	Absence
362	Unclassified_Rhizobiaceae_10_ASV4294	Unclassified_Rhizobiaceae_10_ASV4294	Presence	Absence
363	Unclassified_Rhizobiales_7_ASV4329	Unclassified_Rhizobiales_7_ASV4329	Presence	Absence
364	Bauldia_ASV289	Bauldia_ASV289	Presence	Absence
365	Methylocystis_ASV1378	Methylocystis_ASV1378	Presence	Absence
366	Unclassified_Beijerinckiaceae_12_ASV2880	Unclassified_Beijerinckiaceae_12_ASV2880	Presence	Absence
367	Paracoccus_ASV1591	Paracoccus_ASV1591	Presence	Absence
368	Unclassified_Rhodobacteraceae_92_ASV4439	Unclassified_Rhodobacteraceae_92_ASV4439	Presence	Absence
369	Unclassified_Rhodobacteraceae_91_ASV4438	Unclassified_Rhodobacteraceae_91_ASV4438	Presence	Absence
370	Rubellimicrobium_ASV1927	Rubellimicrobium_ASV1927	Presence	Absence
371	Rubellimicrobium_ASV1929	Rubellimicrobium_ASV1929	Presence	Absence
372	Unclassified_Rhodobacteraceae_29_ASV4369	Unclassified_Rhodobacteraceae_29_ASV4369	Presence	Absence
373	Unclassified_Rhodobacteraceae_94_ASV4441	Unclassified_Rhodobacteraceae_94_ASV4441	Presence	Absence
374	Unclassified_Rhodobacteraceae_47_ASV4389	Unclassified_Rhodobacteraceae_47_ASV4389	Presence	Absence
375	Unclassified_Thalassobaculales_6_ASV4854	Unclassified_Thalassobaculales_6_ASV4854	Presence	Absence
376	Dongia_ASV848	Dongia_ASV848	Presence	Absence
377	Roseomonas_ASV1906	Roseomonas_ASV1906	Presence	Absence
378	Gluconobacter_ASV1022	Gluconobacter_ASV1022	Presence	Absence
379	Acidiphilium_ASV47	Acidiphilium_ASV47	Presence	Absence
380	Unclassified_Elsterales_1_ASV3319	Unclassified_Elsterales_1_ASV3319	Presence	Absence
381	Unclassified_Azospirillaceae_4_ASV2664	Unclassified_Azospirillaceae_4_ASV2664	Presence	Absence
382	Defluviicoccus_ASV723	Defluviicoccus_ASV723	Presence	Absence
383	Sphingomonas_ASV2133	Sphingomonas_ASV2133	Presence	Absence
384	Sphingomonas_ASV2140	Sphingomonas_ASV2140	Presence	Absence
385	Sphingomonas_ASV2134	Sphingomonas_ASV2134	Presence	Absence
386	Sphingomonas_ASV2138	Sphingomonas_ASV2138	Presence	Absence
387	Sphingomonas_ASV2131	Sphingomonas_ASV2131	Presence	Absence
388	Sphingomonas_ASV2135	Sphingomonas_ASV2135	Presence	Absence
389	Sphingomonas_ASV2130	Sphingomonas_ASV2130	Presence	Absence
390	Sphingomonas_ASV2122	Sphingomonas_ASV2122	Presence	Absence
391	Sphingomonas_ASV2128	Sphingomonas_ASV2128	Presence	Absence
392	Sphingomonas_ASV2127	Sphingomonas_ASV2127	Presence	Absence
393	Sphingomonas_ASV2141	Sphingomonas_ASV2141	Presence	Absence
394	Sphingomonas_ASV2123	Sphingomonas_ASV2123	Presence	Absence
395	Sphingomonas_ASV2125	Sphingomonas_ASV2125	Presence	Absence
396	Sphingobium_ASV2119	Sphingobium_ASV2119	Presence	Absence
397	Unclassified_Sphingomonadaceae_11_ASV4749	Unclassified_Sphingomonadaceae_11_ASV4749	Presence	Absence
398	Sphingopyxis_ASV2146	Sphingopyxis_ASV2146	Presence	Absence
399	Novosphingobium_ASV1515	Novosphingobium_ASV1515	Presence	Absence
400	Novosphingobium_ASV1510	Novosphingobium_ASV1510	Presence	Absence
401	Sphingobium_ASV2120	Sphingobium_ASV2120	Presence	Absence
402	Altererythrobacter_ASV165	Altererythrobacter_ASV165	Presence	Absence
403	Unclassified_Sphingomonadaceae_14_ASV4752	Unclassified_Sphingomonadaceae_14_ASV4752	Presence	Absence
404	Clostridium_sensu_stricto_1_ASV593	Clostridium_sensu_stricto_1_ASV593	Presence	Absence
405	Unclassified_Sva1033_ASV2301	Unclassified_Sva1033_ASV2301	Presence	Absence
406	Unclassified_Desulfuromonadaceae_1_ASV3292	Unclassified_Desulfuromonadaceae_1_ASV3292	Presence	Absence
407	Unclassified_Nannocystaceae_4_ASV3922	Unclassified_Nannocystaceae_4_ASV3922	Presence	Absence
408	SEEP-SRB1_ASV2064	SEEP-SRB1_ASV2064	Presence	Absence
409	Unclassified_Sva0485_6_ASV4830	Unclassified_Sva0485_6_ASV4830	Presence	Absence
410	Unclassified_SAR324_clade(Marine_group_B)_9_ASV4603	Unclassified_SAR324_clade(Marine_group_B)_9_ASV4603	Presence	Absence
411	Unclassified_Bradymonadaceae_6_ASV2935	Unclassified_Bradymonadaceae_6_ASV2935	Presence	Absence
412	Unclassified_Bradymonadaceae_9_ASV2938	Unclassified_Bradymonadaceae_9_ASV2938	Presence	Absence
413	Unclassified_Bradymonadales_9_ASV2954	Unclassified_Bradymonadales_9_ASV2954	Presence	Absence
414	Unclassified_Bradymonadales_2_ASV2946	Unclassified_Bradymonadales_2_ASV2946	Presence	Absence
415	Unclassified_Bradymonadales_6_ASV2951	Unclassified_Bradymonadales_6_ASV2951	Presence	Absence
416	Desulfovibrio_ASV804	Desulfovibrio_ASV804	Presence	Absence
417	Desulfovibrio_ASV814	Desulfovibrio_ASV814	Presence	Absence
418	Oligoflexus_ASV1546	Oligoflexus_ASV1546	Presence	Absence
419	Unclassified_Armatimonadales_ASV215	Unclassified_Armatimonadales_ASV215	Presence	Absence
420	Abditibacterium_ASV29	Abditibacterium_ASV29	Presence	Absence
421	Abditibacterium_ASV27	Abditibacterium_ASV27	Presence	Absence
422	Unclassified_Fimbriimonadaceae_1_ASV3384	Unclassified_Fimbriimonadaceae_1_ASV3384	Presence	Absence
423	Unclassified_Moraxellaceae_3_ASV3902	Unclassified_Moraxellaceae_3_ASV3902	Presence	Absence
424	Unknown_Family_Gammaproteobacteria_Incertae_Sedis_4_ASV5014	Unknown_Family_Gammaproteobacteria_Incertae_Sedis_4_ASV5014	Presence	Absence
425	Unclassified_Gammaproteobacteria_2_ASV3473	Unclassified_Gammaproteobacteria_2_ASV3473	Presence	Absence
426	Unclassified_Solimonadaceae_1_ASV4738	Unclassified_Solimonadaceae_1_ASV4738	Presence	Absence
427	Candidatus_Competibacter_ASV430	Candidatus_Competibacter_ASV430	Presence	Absence
428	Candidatus_Competibacter_ASV432	Candidatus_Competibacter_ASV432	Presence	Absence
429	Candidatus_Competibacter_ASV431	Candidatus_Competibacter_ASV431	Presence	Absence
430	Candidatus_Competibacter_ASV429	Candidatus_Competibacter_ASV429	Presence	Absence
431	Burkholderia-Caballeronia-Paraburkholderia_ASV382	Burkholderia-Caballeronia-Paraburkholderia_ASV382	Presence	Absence
432	Unclassified_Comamonadaceae_1_ASV3105	Unclassified_Comamonadaceae_1_ASV3105	Presence	Absence
433	Unclassified_Comamonadaceae_26_ASV3123	Unclassified_Comamonadaceae_26_ASV3123	Presence	Absence
434	Comamonas_ASV636	Comamonas_ASV636	Presence	Absence
435	Unclassified_Comamonadaceae_8_ASV3135	Unclassified_Comamonadaceae_8_ASV3135	Presence	Absence
436	Hydrogenophaga_ASV1096	Hydrogenophaga_ASV1096	Presence	Absence
437	Polaromonas_ASV1704	Polaromonas_ASV1704	Presence	Absence
438	Unclassified_Comamonadaceae_20_ASV3117	Unclassified_Comamonadaceae_20_ASV3117	Presence	Absence
439	Unclassified_Comamonadaceae_31_ASV3129	Unclassified_Comamonadaceae_31_ASV3129	Presence	Absence
440	Methylotenera_ASV1393	Methylotenera_ASV1393	Presence	Absence
441	Unclassified_Sutterellaceae_1_ASV4823	Unclassified_Sutterellaceae_1_ASV4823	Presence	Absence
442	Unclassified_Alcaligenaceae_3_ASV2538	Unclassified_Alcaligenaceae_3_ASV2538	Presence	Absence
443	Unclassified_Alcaligenaceae_5_ASV2540	Unclassified_Alcaligenaceae_5_ASV2540	Presence	Absence
444	Achromobacter_ASV42	Achromobacter_ASV42	Presence	Absence
445	Unclassified_Hydrogenophilaceae_4_ASV3624	Unclassified_Hydrogenophilaceae_4_ASV3624	Presence	Absence
446	Unclassified_Burkholderiaceae_3_ASV2957	Unclassified_Burkholderiaceae_3_ASV2957	Presence	Absence
447	Nitrosospira_ASV1485	Nitrosospira_ASV1485	Presence	Absence
448	Salinisphaera_ASV2019	Salinisphaera_ASV2019	Presence	Absence
449	Salinisphaera_ASV2020	Salinisphaera_ASV2020	Presence	Absence
450	Salinisphaera_ASV2007	Salinisphaera_ASV2007	Presence	Absence
451	Salinisphaera_ASV2005	Salinisphaera_ASV2005	Presence	Absence
452	Salinisphaera_ASV2015	Salinisphaera_ASV2015	Presence	Absence
453	Salinisphaera_ASV1993	Salinisphaera_ASV1993	Presence	Absence
454	Salinisphaera_ASV1999	Salinisphaera_ASV1999	Presence	Absence
455	Salinisphaera_ASV2023	Salinisphaera_ASV2023	Presence	Absence
456	Salinisphaera_ASV2013	Salinisphaera_ASV2013	Presence	Absence
457	Salinisphaera_ASV1997	Salinisphaera_ASV1997	Presence	Absence
458	Salinisphaera_ASV2018	Salinisphaera_ASV2018	Presence	Absence
459	Salinisphaera_ASV1994	Salinisphaera_ASV1994	Presence	Absence
460	Salinisphaera_ASV2006	Salinisphaera_ASV2006	Presence	Absence
461	Desulfosarcina_ASV796	Desulfosarcina_ASV796	Presence	Absence
462	Desulfobacterium_ASV773	Desulfobacterium_ASV773	Presence	Absence
463	Unclassified_Desulfobacteraceae_1_ASV3232	Unclassified_Desulfobacteraceae_1_ASV3232	Presence	Absence
464	Desulfobacter_ASV772	Desulfobacter_ASV772	Presence	Absence
465	Unclassified_Desulfovibrionaceae_11_ASV3280	Unclassified_Desulfovibrionaceae_11_ASV3280	Presence	Absence
466	Unclassified_Desulfovibrionaceae_5_ASV3286	Unclassified_Desulfovibrionaceae_5_ASV3286	Presence	Absence
467	Unclassified_Desulfosarcinaceae_6_ASV3274	Unclassified_Desulfosarcinaceae_6_ASV3274	Presence	Absence
468	Sva0081_sediment_group_ASV2297	Sva0081_sediment_group_ASV2297	Presence	Absence
469	Desulfocella_ASV782	Desulfocella_ASV782	Presence	Absence
470	Desulfocella_ASV779	Desulfocella_ASV779	Presence	Absence
471	Desulfocella_ASV778	Desulfocella_ASV778	Presence	Absence
472	Desulfocella_ASV781	Desulfocella_ASV781	Presence	Absence
473	Desulfocella_ASV776	Desulfocella_ASV776	Presence	Absence
474	Desulfocella_ASV777	Desulfocella_ASV777	Presence	Absence
475	Unclassified_Gammaproteobacteria_7_ASV3528	Unclassified_Gammaproteobacteria_7_ASV3528	Presence	Absence
476	Unclassified_Gammaproteobacteria_43_ASV3499	Unclassified_Gammaproteobacteria_43_ASV3499	Presence	Absence
477	Silanimonas_ASV2087	Silanimonas_ASV2087	Presence	Absence
478	Arenimonas_ASV212	Arenimonas_ASV212	Presence	Absence
479	Arenimonas_ASV213	Arenimonas_ASV213	Presence	Absence
480	Unclassified_Xanthomonadaceae_4_ASV4965	Unclassified_Xanthomonadaceae_4_ASV4965	Presence	Absence
481	Stenotrophomonas_ASV2230	Stenotrophomonas_ASV2230	Presence	Absence
482	Stenotrophomonas_ASV2227	Stenotrophomonas_ASV2227	Presence	Absence
483	Pseudoxanthomonas_ASV1782	Pseudoxanthomonas_ASV1782	Presence	Absence
484	Unclassified_Rhodanobacteraceae_4_ASV4343	Unclassified_Rhodanobacteraceae_4_ASV4343	Presence	Absence
485	Unclassified_Rhodanobacteraceae_5_ASV4344	Unclassified_Rhodanobacteraceae_5_ASV4344	Presence	Absence
486	Alcanivorax_ASV114	Alcanivorax_ASV114	Presence	Absence
487	Unclassified_Gammaproteobacteria_19_ASV3472	Unclassified_Gammaproteobacteria_19_ASV3472	Presence	Absence
488	Unclassified_Gammaproteobacteria_8_ASV3534	Unclassified_Gammaproteobacteria_8_ASV3534	Presence	Absence
489	Unclassified_Wohlfahrtiimonadaceae_2_ASV4948	Unclassified_Wohlfahrtiimonadaceae_2_ASV4948	Presence	Absence
490	Unclassified_Gammaproteobacteria_17_ASV3470	Unclassified_Gammaproteobacteria_17_ASV3470	Presence	Absence
491	Unclassified_UBA10353_marine_group_ASV2401	Unclassified_UBA10353_marine_group_ASV2401	Presence	Absence
492	Unclassified_Chromatiaceae_15_ASV3058	Unclassified_Chromatiaceae_15_ASV3058	Presence	Absence
493	Woeseia_ASV5102	Woeseia_ASV5102	Presence	Absence
494	Unclassified_Gammaproteobacteria_48_ASV3504	Unclassified_Gammaproteobacteria_48_ASV3504	Presence	Absence
495	Marinobacter_ASV1313	Marinobacter_ASV1313	Presence	Absence
496	Marinobacter_ASV1312	Marinobacter_ASV1312	Presence	Absence
497	Marinobacter_ASV1307	Marinobacter_ASV1307	Presence	Absence
498	Marinobacter_ASV1315	Marinobacter_ASV1315	Presence	Absence
499	Pseudomonas_ASV1767	Pseudomonas_ASV1767	Presence	Absence
500	Pseudomonas_ASV1752	Pseudomonas_ASV1752	Presence	Absence
501	Pseudomonas_ASV1757	Pseudomonas_ASV1757	Presence	Absence
502	Pseudomonas_ASV1755	Pseudomonas_ASV1755	Presence	Absence
503	Gilvimarinus_ASV1017	Gilvimarinus_ASV1017	Presence	Absence
504	Marinimicrobium_ASV1306	Marinimicrobium_ASV1306	Presence	Absence
505	Cellvibrio_ASV503	Cellvibrio_ASV503	Presence	Absence
506	C1-B045_ASV384	C1-B045_ASV384	Presence	Absence
507	Alteromonas_ASV168	Alteromonas_ASV168	Presence	Absence
508	Unclassified_Gammaproteobacteria_60_ASV3518	Unclassified_Gammaproteobacteria_60_ASV3518	Presence	Absence
509	Unclassified_Enterobacterales_4_ASV3323	Unclassified_Enterobacterales_4_ASV3323	Presence	Absence
510	Gilliamella_ASV1014	Gilliamella_ASV1014	Presence	Absence
511	Unclassified_Pasteurellaceae_7_ASV4052	Unclassified_Pasteurellaceae_7_ASV4052	Presence	Absence
512	Unclassified_Pasteurellaceae_2_ASV4047	Unclassified_Pasteurellaceae_2_ASV4047	Presence	Absence
513	Agarivorans_ASV104	Agarivorans_ASV104	Presence	Absence
514	Vibrio_ASV5050	Vibrio_ASV5050	Presence	Absence
515	Vibrio_ASV5059	Vibrio_ASV5059	Presence	Absence
516	Unclassified_Yersiniaceae_1_ASV4969	Unclassified_Yersiniaceae_1_ASV4969	Presence	Absence
517	Unclassified_Enterobacteriaceae_16_ASV3333	Unclassified_Enterobacteriaceae_16_ASV3333	Presence	Absence
518	Unclassified_Enterobacteriaceae_4_ASV3341	Unclassified_Enterobacteriaceae_4_ASV3341	Presence	Absence
519	Unclassified_Enterobacteriaceae_19_ASV3336	Unclassified_Enterobacteriaceae_19_ASV3336	Presence	Absence
520	Unclassified_Enterobacteriaceae_11_ASV3328	Unclassified_Enterobacteriaceae_11_ASV3328	Presence	Absence
521	Unclassified_Enterobacteriaceae_20_ASV3338	Unclassified_Enterobacteriaceae_20_ASV3338	Presence	Absence
522	Unclassified_Enterobacteriaceae_12_ASV3329	Unclassified_Enterobacteriaceae_12_ASV3329	Presence	Absence
523	Unclassified_Enterobacteriaceae_8_ASV3345	Unclassified_Enterobacteriaceae_8_ASV3345	Presence	Absence
524	Unclassified_Morganellaceae_2_ASV3904	Unclassified_Morganellaceae_2_ASV3904	Presence	Absence
525	Ketobacter_ASV1138	Ketobacter_ASV1138	Presence	Absence
526	9M32_ASV24	9M32_ASV24	Presence	Absence
527	Psychrobacter_ASV1784	Psychrobacter_ASV1784	Presence	Absence
528	Acinetobacter_ASV69	Acinetobacter_ASV69	Presence	Absence
529	[Agitococcus]_lubricus_group_ASV3	[Agitococcus]_lubricus_group_ASV3	Presence	Absence
530	Arsenophonus_ASV216	Arsenophonus_ASV216	Presence	Absence
531	Unclassified_Halieaceae_6_ASV3603	Unclassified_Halieaceae_6_ASV3603	Presence	Absence
532	Pseudohaliea_ASV1746	Pseudohaliea_ASV1746	Presence	Absence
533	Halomonas_ASV1078	Halomonas_ASV1078	Presence	Absence
534	Halomonas_ASV1070	Halomonas_ASV1070	Presence	Absence
535	Alcanivorax_ASV111	Alcanivorax_ASV111	Presence	Absence
536	Alcanivorax_ASV117	Alcanivorax_ASV117	Presence	Absence
537	Alcanivorax_ASV110	Alcanivorax_ASV110	Presence	Absence
538	Unclassified_Gammaproteobacteria_4_ASV3495	Unclassified_Gammaproteobacteria_4_ASV3495	Presence	Absence
539	Unclassified_Gammaproteobacteria_55_ASV3512	Unclassified_Gammaproteobacteria_55_ASV3512	Presence	Absence
540	Unclassified_Gammaproteobacteria_49_ASV3505	Unclassified_Gammaproteobacteria_49_ASV3505	Presence	Absence
541	Unclassified_EPR3968-O8a-Bc78_7_ASV3353	Unclassified_EPR3968-O8a-Bc78_7_ASV3353	Presence	Absence
542	Unclassified_EPR3968-O8a-Bc78_3_ASV3349	Unclassified_EPR3968-O8a-Bc78_3_ASV3349	Presence	Absence
543	Unclassified_Gammaproteobacteria_3_ASV3484	Unclassified_Gammaproteobacteria_3_ASV3484	Presence	Absence
544	Unclassified_Gammaproteobacteria_67_ASV3525	Unclassified_Gammaproteobacteria_67_ASV3525	Presence	Absence
545	Unclassified_Gammaproteobacteria_71_ASV3530	Unclassified_Gammaproteobacteria_71_ASV3530	Presence	Absence
546	Unclassified_Gammaproteobacteria_68_ASV3526	Unclassified_Gammaproteobacteria_68_ASV3526	Presence	Absence
547	Wenzhouxiangella_ASV5088	Wenzhouxiangella_ASV5088	Presence	Absence
548	Nitrosococcus_ASV1480	Nitrosococcus_ASV1480	Presence	Absence
549	Unclassified_Nitrosococcaceae_7_ASV3971	Unclassified_Nitrosococcaceae_7_ASV3971	Presence	Absence
550	Nitrococcus_ASV1479	Nitrococcus_ASV1479	Presence	Absence
551	Methylophaga_ASV1387	Methylophaga_ASV1387	Presence	Absence
552	Candidatus_Thiobios_ASV478	Candidatus_Thiobios_ASV478	Presence	Absence
553	Unknown_Family_Gammaproteobacteria_Incertae_Sedis_7_ASV5017	Unknown_Family_Gammaproteobacteria_Incertae_Sedis_7_ASV5017	Presence	Absence
554	Aquicella_ASV206	Aquicella_ASV206	Presence	Absence
555	Legionella_ASV1217	Legionella_ASV1217	Presence	Absence
556	Legionella_ASV1211	Legionella_ASV1211	Presence	Absence
557	Legionella_ASV1230	Legionella_ASV1230	Presence	Absence
558	Campylobacter_ASV403	Campylobacter_ASV403	Presence	Absence
559	Helicobacter_ASV1089	Helicobacter_ASV1089	Presence	Absence
560	Helicobacter_ASV1087	Helicobacter_ASV1087	Presence	Absence
561	Unclassified_Babeliales_2_ASV2669	Unclassified_Babeliales_2_ASV2669	Presence	Absence
562	Unclassified_Absconditabacteriales_(SR1)_1_ASV2463	Unclassified_Absconditabacteriales_(SR1)_1_ASV2463	Presence	Absence
563	Unclassified_Gracilibacteria_3_ASV3594	Unclassified_Gracilibacteria_3_ASV3594	Presence	Absence
564	Candidatus_Falkowbacteria_ASV434	Candidatus_Falkowbacteria_ASV434	Presence	Absence
565	Unclassified_Parcubacteria_14_ASV4032	Unclassified_Parcubacteria_14_ASV4032	Presence	Absence
566	Unclassified_Parcubacteria_13_ASV4031	Unclassified_Parcubacteria_13_ASV4031	Presence	Absence
567	Unclassified_Parcubacteria_1_ASV4027	Unclassified_Parcubacteria_1_ASV4027	Presence	Absence
568	Candidatus_Paceibacter_ASV461	Candidatus_Paceibacter_ASV461	Presence	Absence
569	Unclassified_Parcubacteria_11_ASV4029	Unclassified_Parcubacteria_11_ASV4029	Presence	Absence
570	Mycoplasma_ASV1438	Mycoplasma_ASV1438	Presence	Absence
571	Mycoplasma_ASV1443	Mycoplasma_ASV1443	Presence	Absence
572	Mycoplasma_ASV1439	Mycoplasma_ASV1439	Presence	Absence
573	Mycoplasma_ASV1437	Mycoplasma_ASV1437	Presence	Absence
574	Mycoplasma_ASV1448	Mycoplasma_ASV1448	Presence	Absence
575	Izimaplasma_ASV1129	Izimaplasma_ASV1129	Presence	Absence
576	Unclassified_Izemoplasmataceae_2_ASV3653	Unclassified_Izemoplasmataceae_2_ASV3653	Presence	Absence
577	Unclassified_Izemoplasmataceae_4_ASV3655	Unclassified_Izemoplasmataceae_4_ASV3655	Presence	Absence
578	Deinococcus_ASV731	Deinococcus_ASV731	Presence	Absence
579	Truepera_ASV2388	Truepera_ASV2388	Presence	Absence
580	Truepera_ASV2387	Truepera_ASV2387	Presence	Absence
581	Truepera_ASV2380	Truepera_ASV2380	Presence	Absence
582	Leptotrichia_ASV1244	Leptotrichia_ASV1244	Presence	Absence
583	Streptobacillus_ASV2236	Streptobacillus_ASV2236	Presence	Absence
584	Facklamia_ASV913	Facklamia_ASV913	Presence	Absence
585	Unclassified_Carnobacteriaceae_1_ASV2995	Unclassified_Carnobacteriaceae_1_ASV2995	Presence	Absence
586	Atopostipes_ASV232	Atopostipes_ASV232	Presence	Absence
587	Atopostipes_ASV230	Atopostipes_ASV230	Presence	Absence
588	Atopostipes_ASV229	Atopostipes_ASV229	Presence	Absence
589	Unclassified_Lactobacillales_1_ASV3721	Unclassified_Lactobacillales_1_ASV3721	Presence	Absence
590	Enterococcus_ASV866	Enterococcus_ASV866	Presence	Absence
591	Aerococcus_ASV96	Aerococcus_ASV96	Presence	Absence
592	Unclassified_Aerococcaceae_1_ASV2514	Unclassified_Aerococcaceae_1_ASV2514	Presence	Absence
593	Enterococcus_ASV870	Enterococcus_ASV870	Presence	Absence
594	Unclassified_Lactobacillales_2_ASV3722	Unclassified_Lactobacillales_2_ASV3722	Presence	Absence
595	Granulicatella_ASV1036	Granulicatella_ASV1036	Presence	Absence
596	Staphylococcus_ASV2219	Staphylococcus_ASV2219	Presence	Absence
597	Staphylococcus_ASV2214	Staphylococcus_ASV2214	Presence	Absence
598	Staphylococcus_ASV2222	Staphylococcus_ASV2222	Presence	Absence
599	Unclassified_Staphylococcaceae_2_ASV4796	Unclassified_Staphylococcaceae_2_ASV4796	Presence	Absence
600	Nosocomiicoccus_ASV1507	Nosocomiicoccus_ASV1507	Presence	Absence
601	Jeotgalicoccus_ASV1132	Jeotgalicoccus_ASV1132	Presence	Absence
602	Bacillus_ASV261	Bacillus_ASV261	Presence	Absence
603	Unclassified_Bacillales_6_ASV2699	Unclassified_Bacillales_6_ASV2699	Presence	Absence
604	Unclassified_Bacillales_1_ASV2694	Unclassified_Bacillales_1_ASV2694	Presence	Absence
605	Exiguobacterium_ASV910	Exiguobacterium_ASV910	Presence	Absence
606	Gemella_ASV985	Gemella_ASV985	Presence	Absence
607	Unclassified_Bacillales_5_ASV2698	Unclassified_Bacillales_5_ASV2698	Presence	Absence
608	Unclassified_Bacillales_2_ASV2695	Unclassified_Bacillales_2_ASV2695	Presence	Absence
609	Unclassified_Marinococcaceae_5_ASV3812	Unclassified_Marinococcaceae_5_ASV3812	Presence	Absence
610	Marinococcus_ASV1319	Marinococcus_ASV1319	Presence	Absence
611	Unclassified_Marinococcaceae_9_ASV3816	Unclassified_Marinococcaceae_9_ASV3816	Presence	Absence
612	Unclassified_Sporolactobacillaceae_1_ASV4784	Unclassified_Sporolactobacillaceae_1_ASV4784	Presence	Absence
613	Unclassified_Bacillales_3_ASV2696	Unclassified_Bacillales_3_ASV2696	Presence	Absence
614	Unclassified_Bacillaceae_1_ASV2677	Unclassified_Bacillaceae_1_ASV2677	Presence	Absence
615	Unclassified_Bacillaceae_5_ASV2689	Unclassified_Bacillaceae_5_ASV2689	Presence	Absence
616	Oceanobacillus_ASV1533	Oceanobacillus_ASV1533	Presence	Absence
617	Virgibacillus_ASV5073	Virgibacillus_ASV5073	Presence	Absence
618	Unclassified_Bacillaceae_4_ASV2688	Unclassified_Bacillaceae_4_ASV2688	Presence	Absence
619	Unclassified_Bacillaceae_2_ASV2686	Unclassified_Bacillaceae_2_ASV2686	Presence	Absence
620	Unclassified_Bacillaceae_9_ASV2693	Unclassified_Bacillaceae_9_ASV2693	Presence	Absence
621	Oceanobacillus_ASV1531	Oceanobacillus_ASV1531	Presence	Absence
622	Bacillus_ASV249	Bacillus_ASV249	Presence	Absence
623	Bacillus_ASV260	Bacillus_ASV260	Presence	Absence
624	Fructobacillus_ASV967	Fructobacillus_ASV967	Presence	Absence
625	Companilactobacillus_ASV642	Companilactobacillus_ASV642	Presence	Absence
626	Limosilactobacillus_ASV1271	Limosilactobacillus_ASV1271	Presence	Absence
627	Pediococcus_ASV1610	Pediococcus_ASV1610	Presence	Absence
628	Unclassified_Bacilli_1_ASV2700	Unclassified_Bacilli_1_ASV2700	Presence	Absence
629	Unclassified_Nodosilineaceae_3_ASV3981	Unclassified_Nodosilineaceae_3_ASV3981	Presence	Absence
630	Phormidium_MBIC10003_ASV1658	Phormidium_MBIC10003_ASV1658	Presence	Absence
631	Dactylococcopsis_PCC-8305_ASV717	Dactylococcopsis_PCC-8305_ASV717	Presence	Absence
632	Leptolyngbya_ANT.L52.2_ASV1236	Leptolyngbya_ANT.L52.2_ASV1236	Presence	Absence
633	Xenococcus_PCC-7305_ASV5111	Xenococcus_PCC-7305_ASV5111	Presence	Absence
634	Scytonema_VB-61278_ASV2046	Scytonema_VB-61278_ASV2046	Presence	Absence
635	Scytonema_VB-61278_ASV2042	Scytonema_VB-61278_ASV2042	Presence	Absence
636	Cyanobium_PCC-6307_ASV693	Cyanobium_PCC-6307_ASV693	Presence	Absence
637	Unclassified_Obscuribacteraceae_2_ASV3990	Unclassified_Obscuribacteraceae_2_ASV3990	Presence	Absence
638	Unclassified_Sericytochromatia_3_ASV4714	Unclassified_Sericytochromatia_3_ASV4714	Presence	Absence
639	Solobacterium_ASV2109	Solobacterium_ASV2109	Presence	Absence
640	Erysipelatoclostridium_ASV879	Erysipelatoclostridium_ASV879	Presence	Absence
641	Erysipelothrix_ASV884	Erysipelothrix_ASV884	Presence	Absence
642	Erysipelothrix_ASV883	Erysipelothrix_ASV883	Presence	Absence
643	Erysipelothrix_ASV885	Erysipelothrix_ASV885	Presence	Absence
644	Acholeplasma_ASV39	Acholeplasma_ASV39	Presence	Absence
645	Acholeplasma_ASV40	Acholeplasma_ASV40	Presence	Absence
646	Unclassified_Erysipelotrichaceae_2_ASV3366	Unclassified_Erysipelotrichaceae_2_ASV3366	Presence	Absence
647	Streptococcus_ASV2238	Streptococcus_ASV2238	Presence	Absence
648	Streptococcus_ASV2254	Streptococcus_ASV2254	Presence	Absence
649	Streptococcus_ASV2244	Streptococcus_ASV2244	Presence	Absence
650	Streptococcus_ASV2241	Streptococcus_ASV2241	Presence	Absence
651	Mycoplasma_ASV1444	Mycoplasma_ASV1444	Presence	Absence
652	Ureaplasma_ASV5030	Ureaplasma_ASV5030	Presence	Absence
653	Ureaplasma_ASV5031	Ureaplasma_ASV5031	Presence	Absence
654	Unclassified_Anaerovoracaceae_1_ASV2626	Unclassified_Anaerovoracaceae_1_ASV2626	Presence	Absence
655	Anaerococcus_ASV183	Anaerococcus_ASV183	Presence	Absence
656	Anaerococcus_ASV178	Anaerococcus_ASV178	Presence	Absence
657	Anaerococcus_ASV179	Anaerococcus_ASV179	Presence	Absence
658	Peptoniphilus_ASV1622	Peptoniphilus_ASV1622	Presence	Absence
659	Peptoniphilus_ASV1623	Peptoniphilus_ASV1623	Presence	Absence
660	Tissierella_ASV2370	Tissierella_ASV2370	Presence	Absence
661	Tissierella_ASV2369	Tissierella_ASV2369	Presence	Absence
662	ZOR0006_ASV5117	ZOR0006_ASV5117	Presence	Absence
663	Unclassified_LCP-89_4_ASV3748	Unclassified_LCP-89_4_ASV3748	Presence	Absence
664	Halanaerobium_ASV1045	Halanaerobium_ASV1045	Presence	Absence
665	Halanaerobium_ASV1048	Halanaerobium_ASV1048	Presence	Absence
666	Unclassified_Clostridia_2_ASV3080	Unclassified_Clostridia_2_ASV3080	Presence	Absence
667	Unclassified_Christensenellaceae_4_ASV3049	Unclassified_Christensenellaceae_4_ASV3049	Presence	Absence
668	Saccharibacillus_ASV1956	Saccharibacillus_ASV1956	Presence	Absence
669	Unclassified_Christensenellaceae_5_ASV3050	Unclassified_Christensenellaceae_5_ASV3050	Presence	Absence
670	Unclassified_MBA03_ASV1340	Unclassified_MBA03_ASV1340	Presence	Absence
671	Unclassified_Christensenellaceae_3_ASV3048	Unclassified_Christensenellaceae_3_ASV3048	Presence	Absence
672	Unclassified_Peptostreptococcales-Tissierellales_1_ASV4101	Unclassified_Peptostreptococcales-Tissierellales_1_ASV4101	Presence	Absence
673	Fusibacter_ASV973	Fusibacter_ASV973	Presence	Absence
674	Fusibacter_ASV970	Fusibacter_ASV970	Presence	Absence
675	Fusibacter_ASV972	Fusibacter_ASV972	Presence	Absence
676	Fusibacter_ASV974	Fusibacter_ASV974	Presence	Absence
677	Unclassified_Peptostreptococcaceae_2_ASV4098	Unclassified_Peptostreptococcaceae_2_ASV4098	Presence	Absence
678	Defluviitaleaceae_UCG-011_ASV728	Defluviitaleaceae_UCG-011_ASV728	Presence	Absence
679	Epulopiscium_ASV878	Epulopiscium_ASV878	Presence	Absence
680	Lachnospiraceae_NK4A136_group_ASV1165	Lachnospiraceae_NK4A136_group_ASV1165	Presence	Absence
681	Unclassified_Lachnospiraceae_15_ASV3688	Unclassified_Lachnospiraceae_15_ASV3688	Presence	Absence
682	Lachnospiraceae_UCG-001_ASV1166	Lachnospiraceae_UCG-001_ASV1166	Presence	Absence
683	Unclassified_Lachnospiraceae_10_ASV3683	Unclassified_Lachnospiraceae_10_ASV3683	Presence	Absence
684	Unclassified_Lachnospiraceae_7_ASV3710	Unclassified_Lachnospiraceae_7_ASV3710	Presence	Absence
685	Lachnoclostridium_ASV1159	Lachnoclostridium_ASV1159	Presence	Absence
686	Tyzzerella_ASV2397	Tyzzerella_ASV2397	Presence	Absence
687	Monoglobus_ASV1409	Monoglobus_ASV1409	Presence	Absence
688	Incertae_Sedis_ASV1128	Incertae_Sedis_ASV1128	Presence	Absence
689	Ruminococcus_ASV1954	Ruminococcus_ASV1954	Presence	Absence
690	Unclassified_Ruminococcaceae_11_ASV4491	Unclassified_Ruminococcaceae_11_ASV4491	Presence	Absence
691	Unclassified_Ruminococcaceae_15_ASV4495	Unclassified_Ruminococcaceae_15_ASV4495	Presence	Absence
692	Ruminiclostridium_ASV1950	Ruminiclostridium_ASV1950	Presence	Absence
693	Clostridium_sensu_stricto_1_ASV588	Clostridium_sensu_stricto_1_ASV588	Presence	Absence
694	Clostridium_sensu_stricto_1_ASV572	Clostridium_sensu_stricto_1_ASV572	Presence	Absence
695	Clostridium_sensu_stricto_1_ASV615	Clostridium_sensu_stricto_1_ASV615	Presence	Absence
696	Clostridium_sensu_stricto_1_ASV592	Clostridium_sensu_stricto_1_ASV592	Presence	Absence
697	Clostridium_sensu_stricto_1_ASV576	Clostridium_sensu_stricto_1_ASV576	Presence	Absence
698	Clostridium_sensu_stricto_1_ASV596	Clostridium_sensu_stricto_1_ASV596	Presence	Absence
699	Clostridium_sensu_stricto_1_ASV566	Clostridium_sensu_stricto_1_ASV566	Presence	Absence
700	Clostridium_sensu_stricto_1_ASV581	Clostridium_sensu_stricto_1_ASV581	Presence	Absence
701	Clostridium_sensu_stricto_1_ASV617	Clostridium_sensu_stricto_1_ASV617	Presence	Absence
702	Christensenellaceae_R-7_group_ASV528	Christensenellaceae_R-7_group_ASV528	Presence	Absence
